# Supplementary material for: Cell-type-specific inhibitory circuitry from a connectomic census of mouse visual cortex
Source: PubMed Central journal article supplement (PMC9900837; doi:10.1101/2023.01.23.525290), 2023-01-24

# Group 1

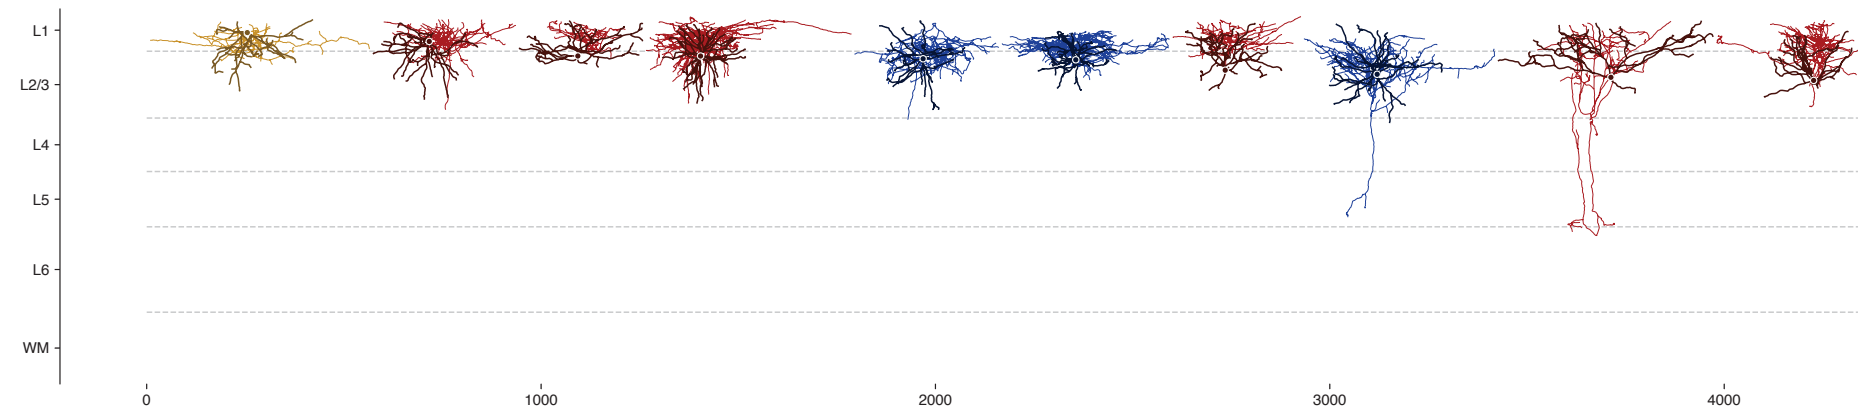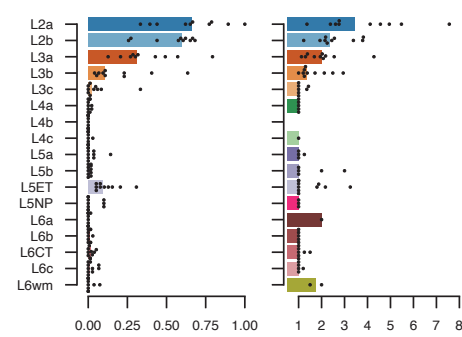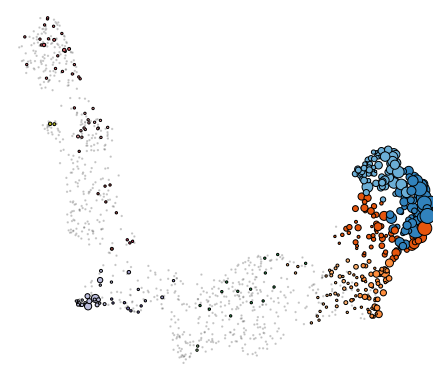

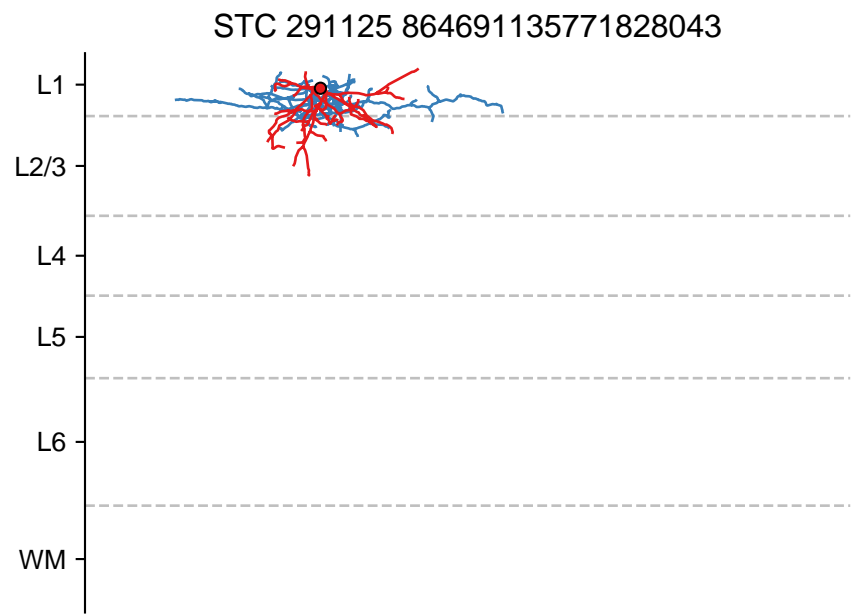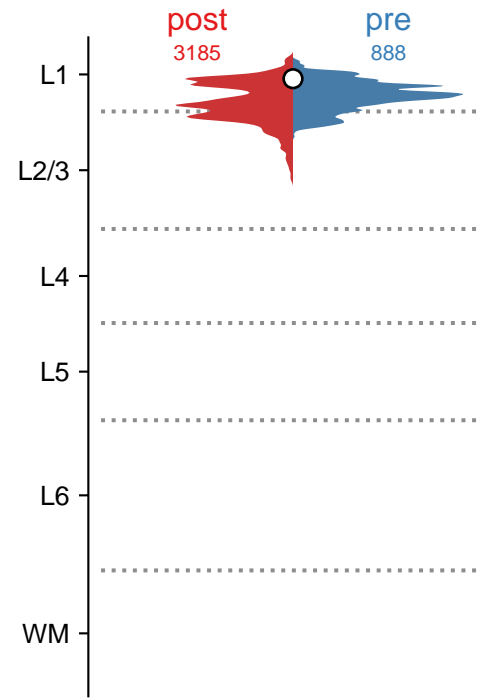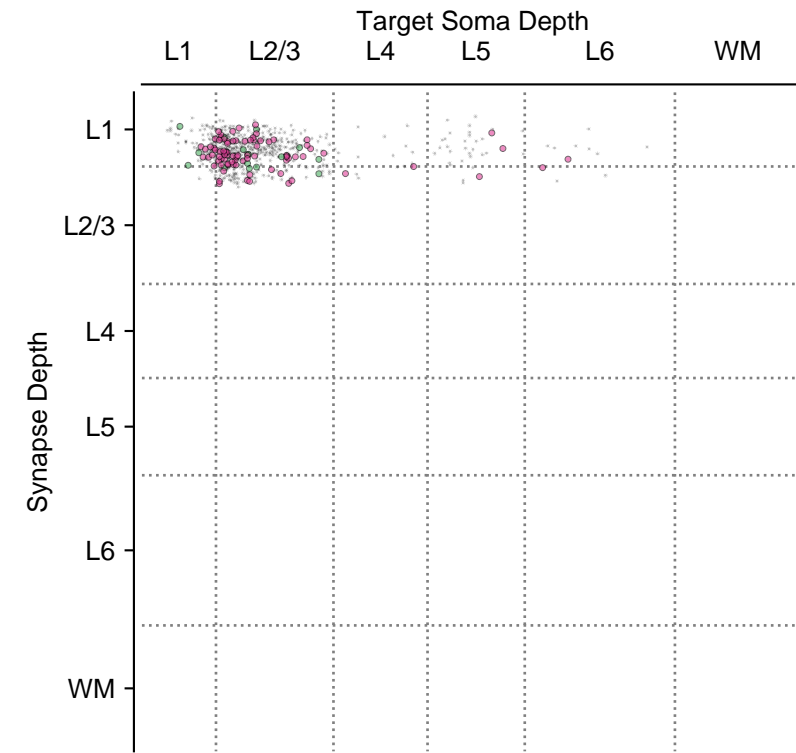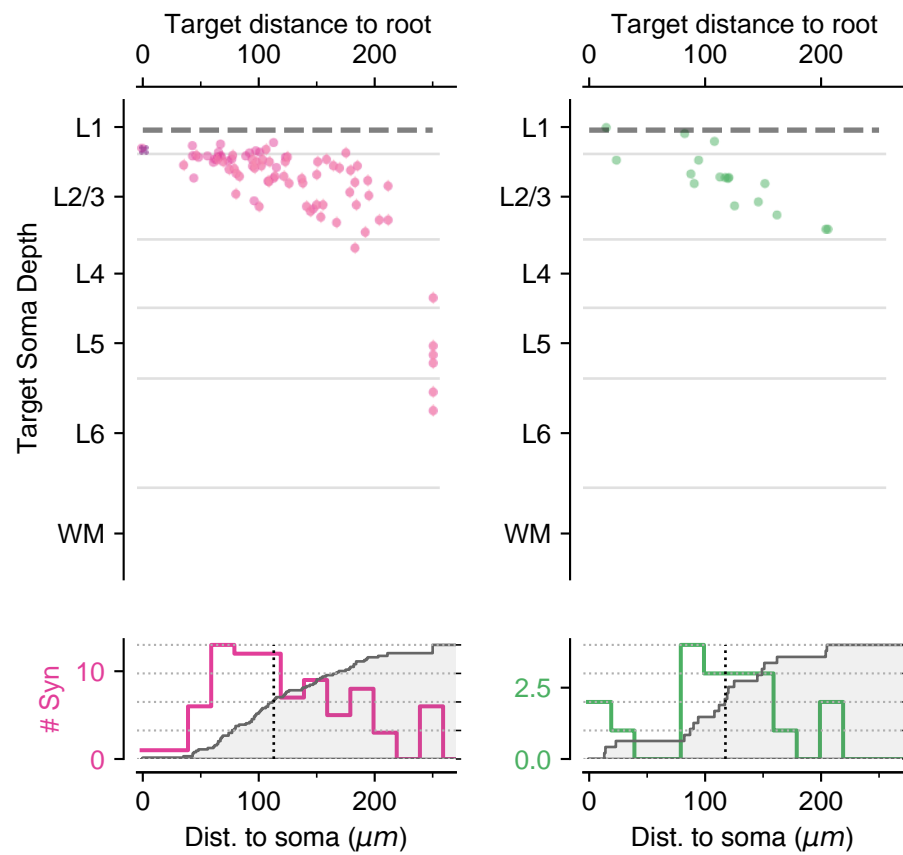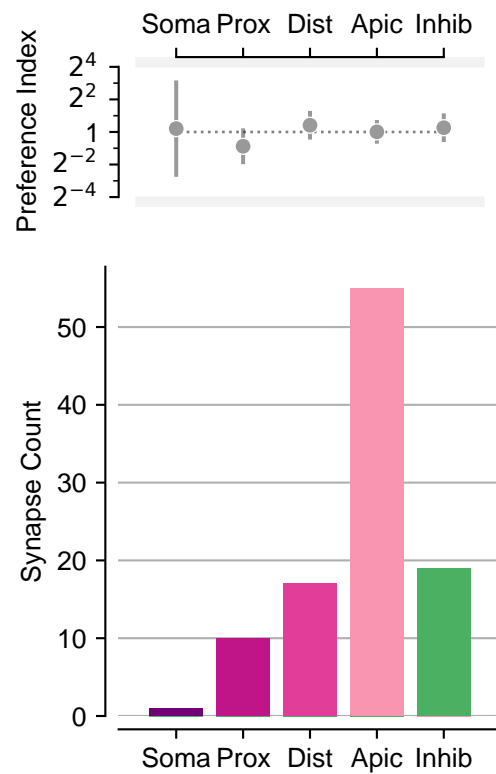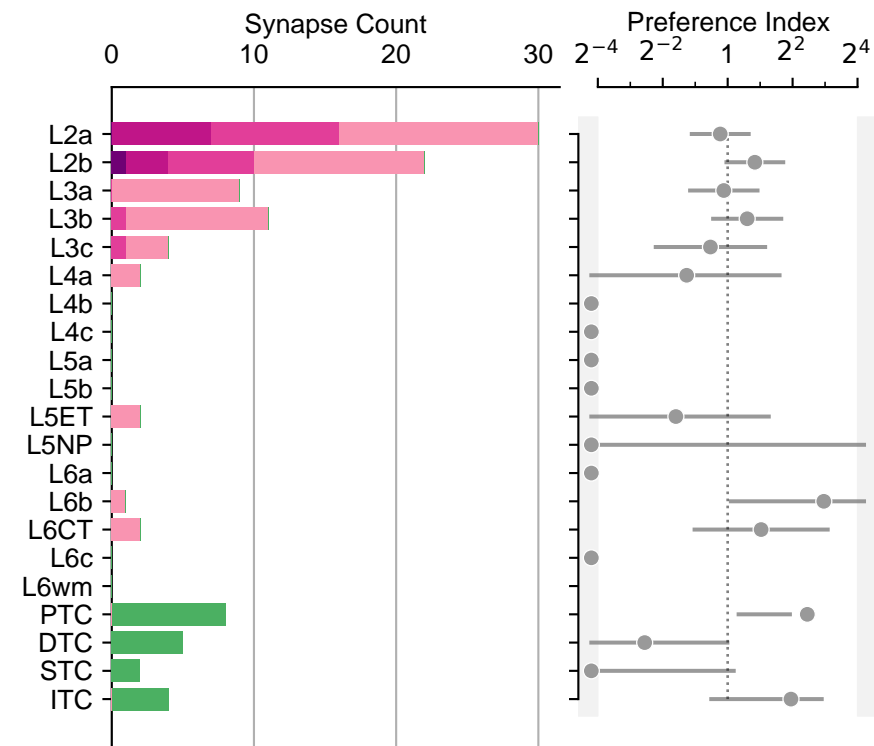



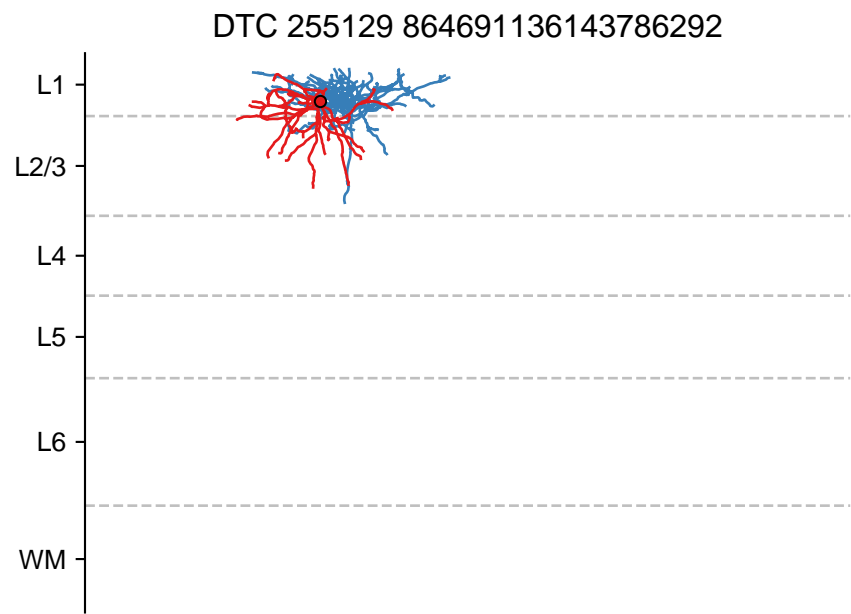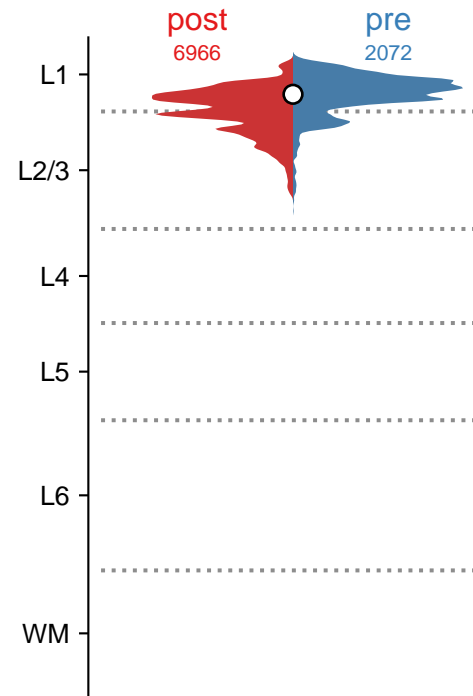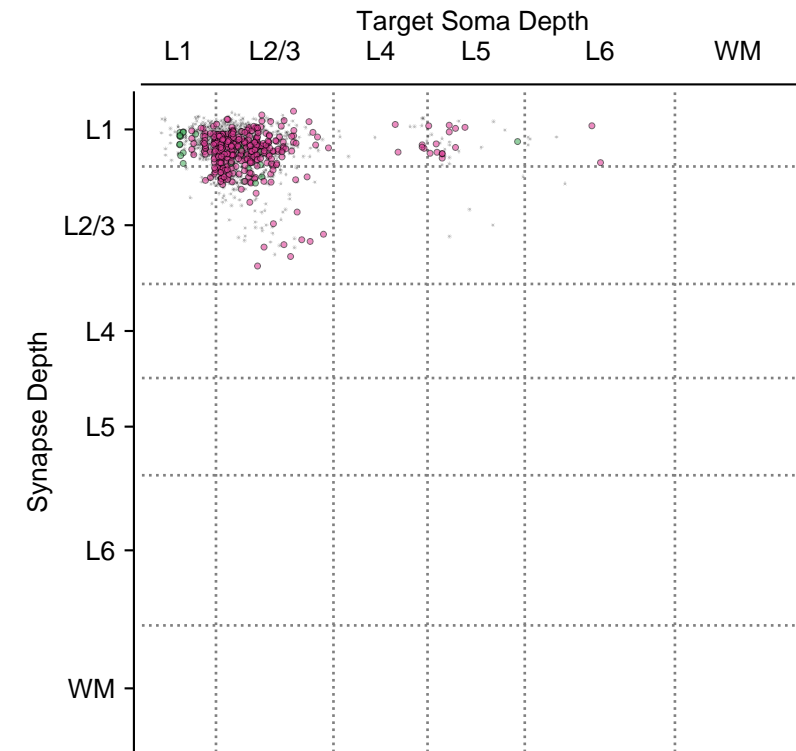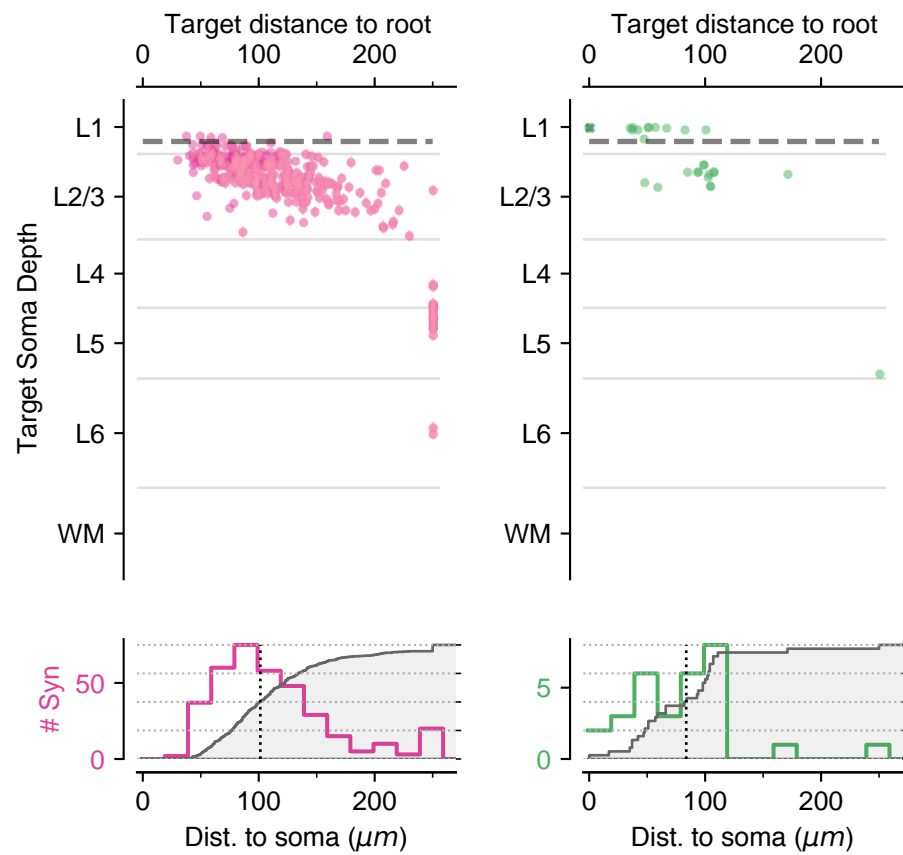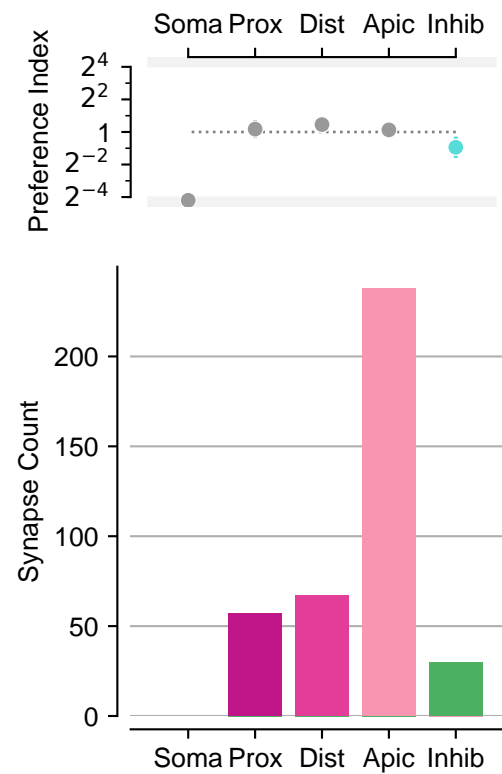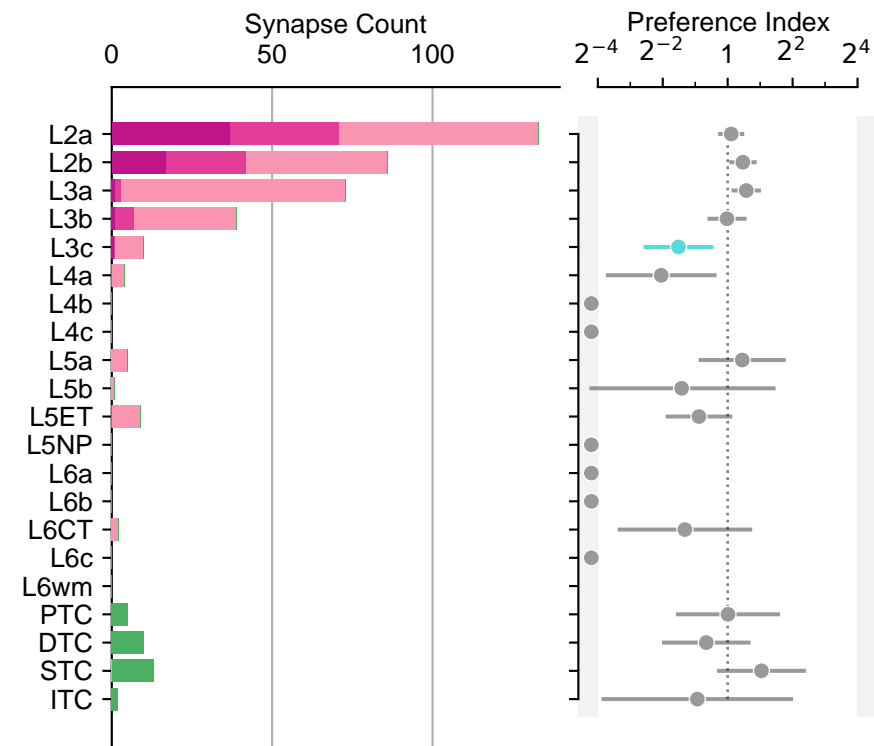

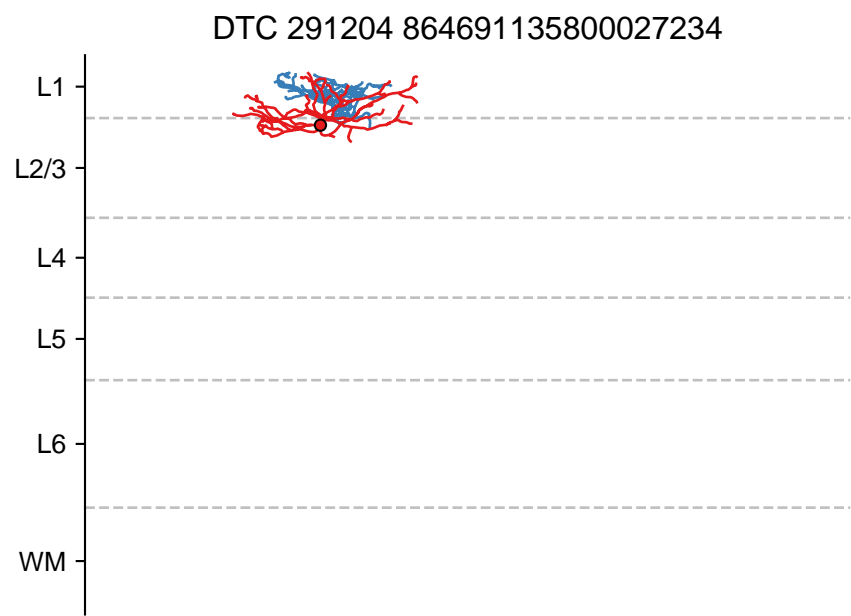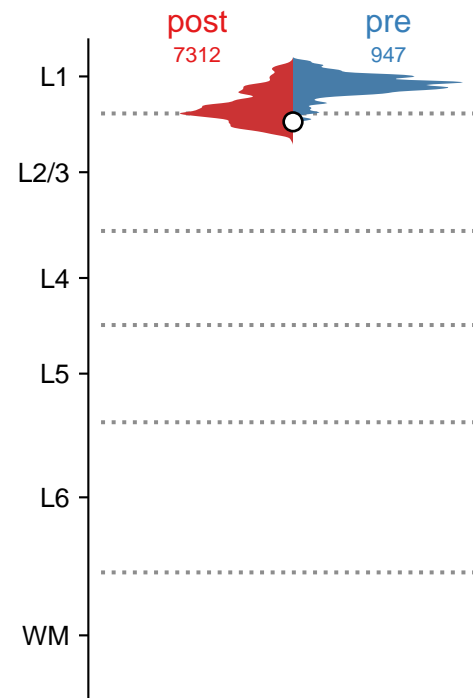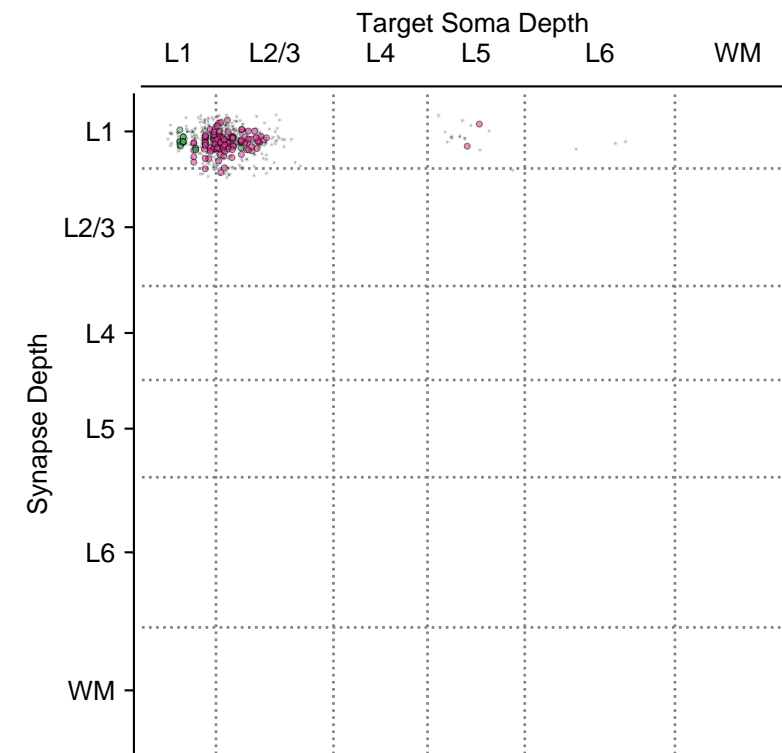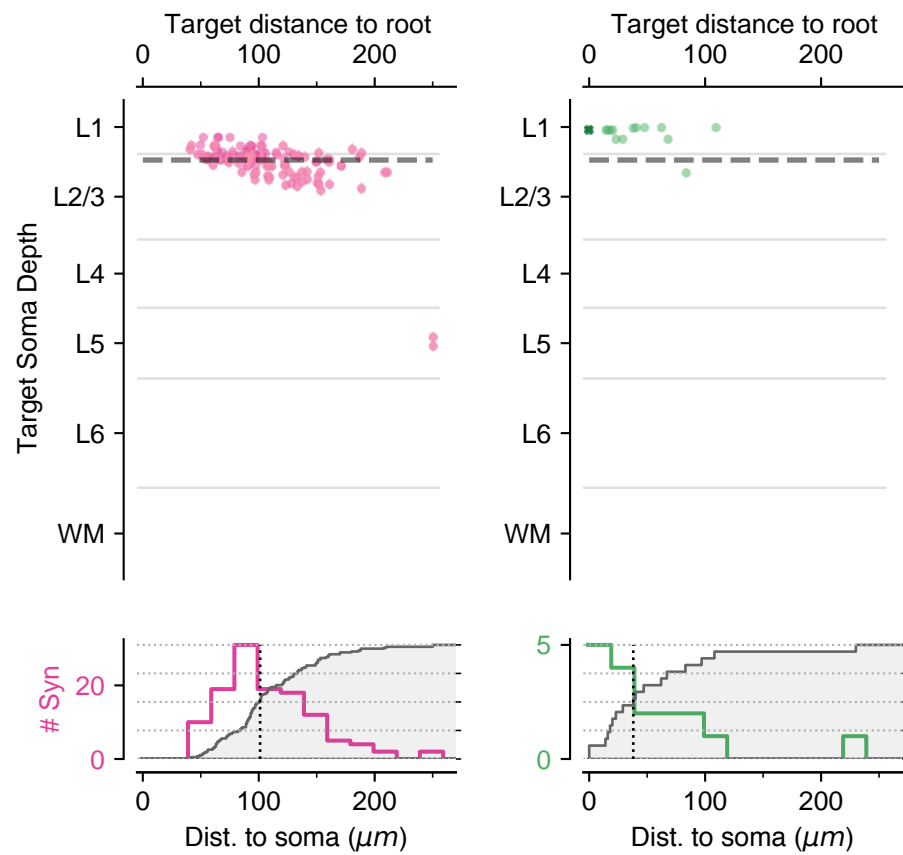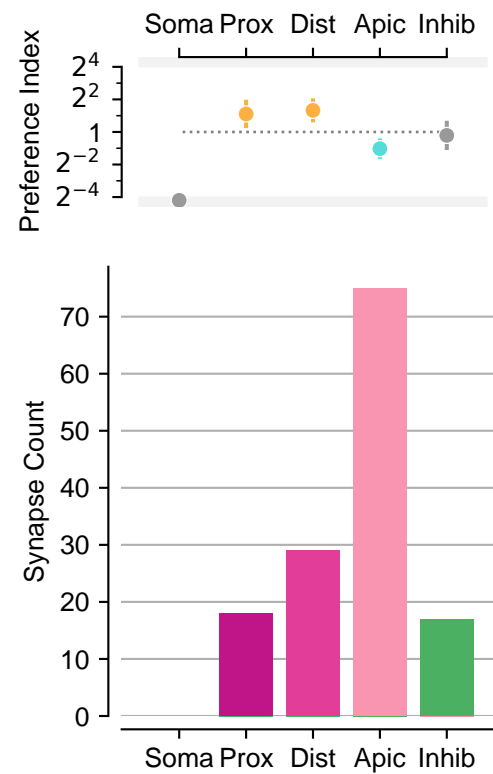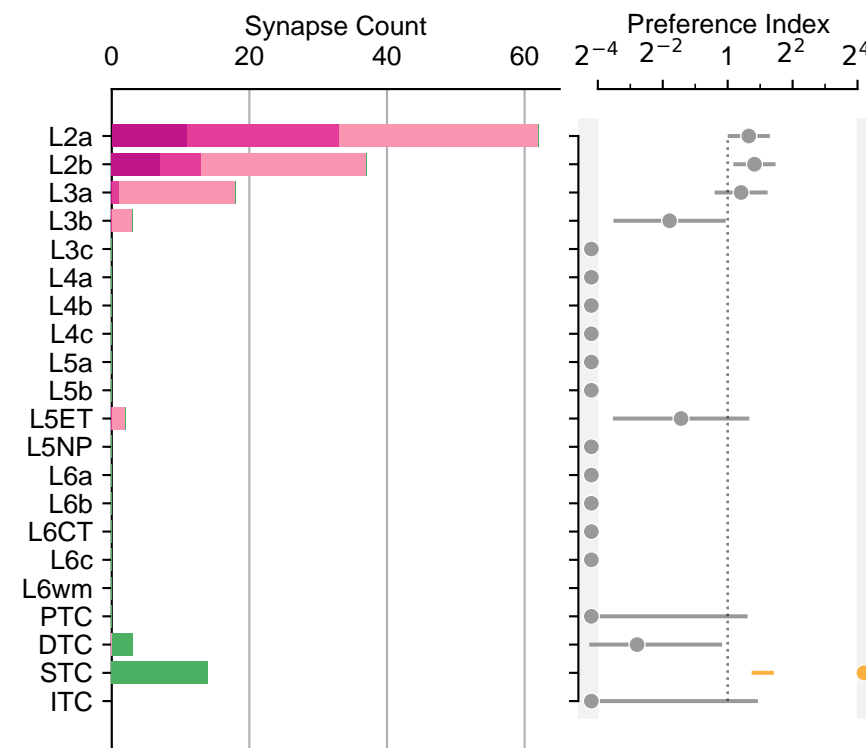

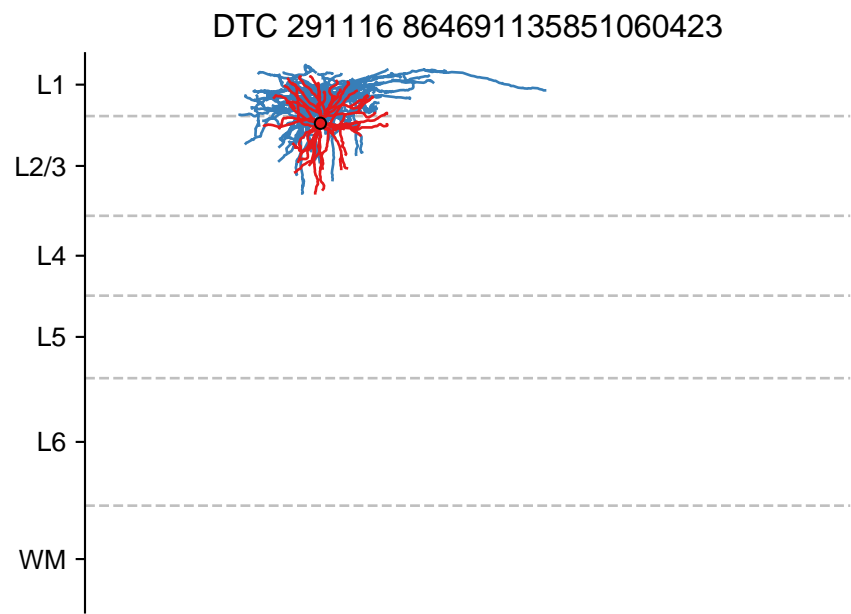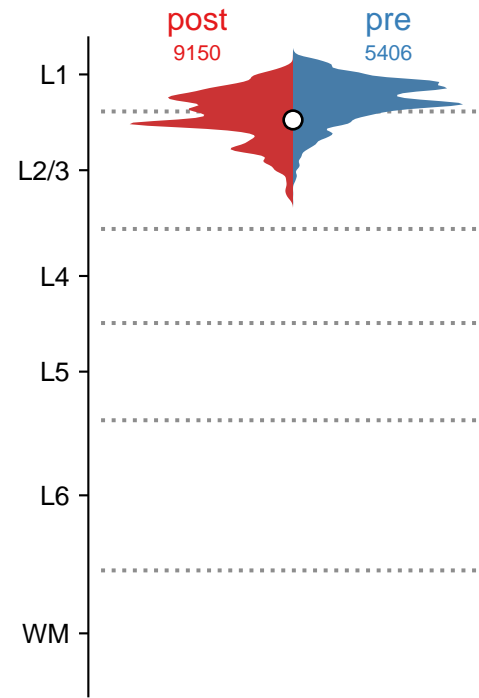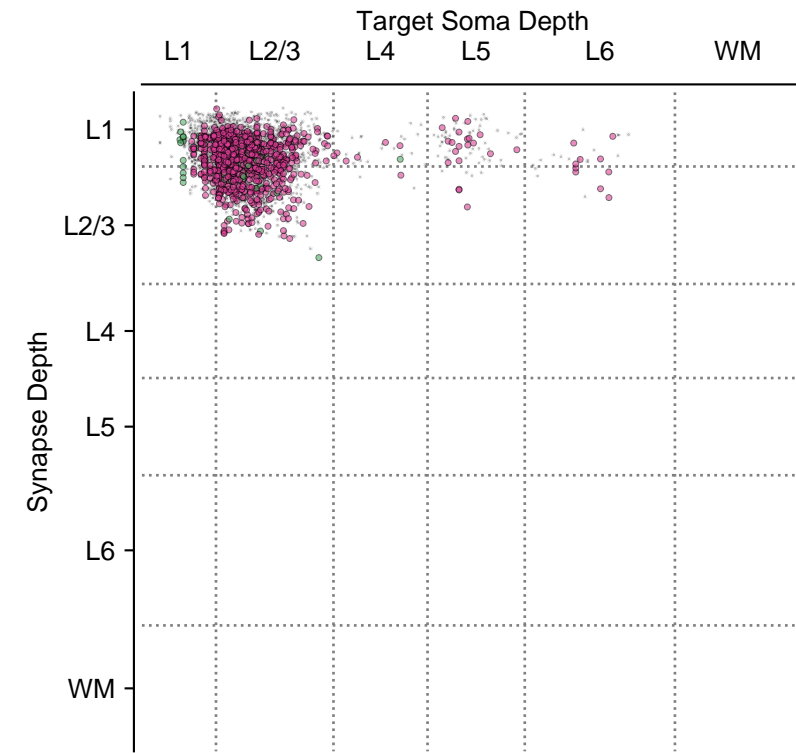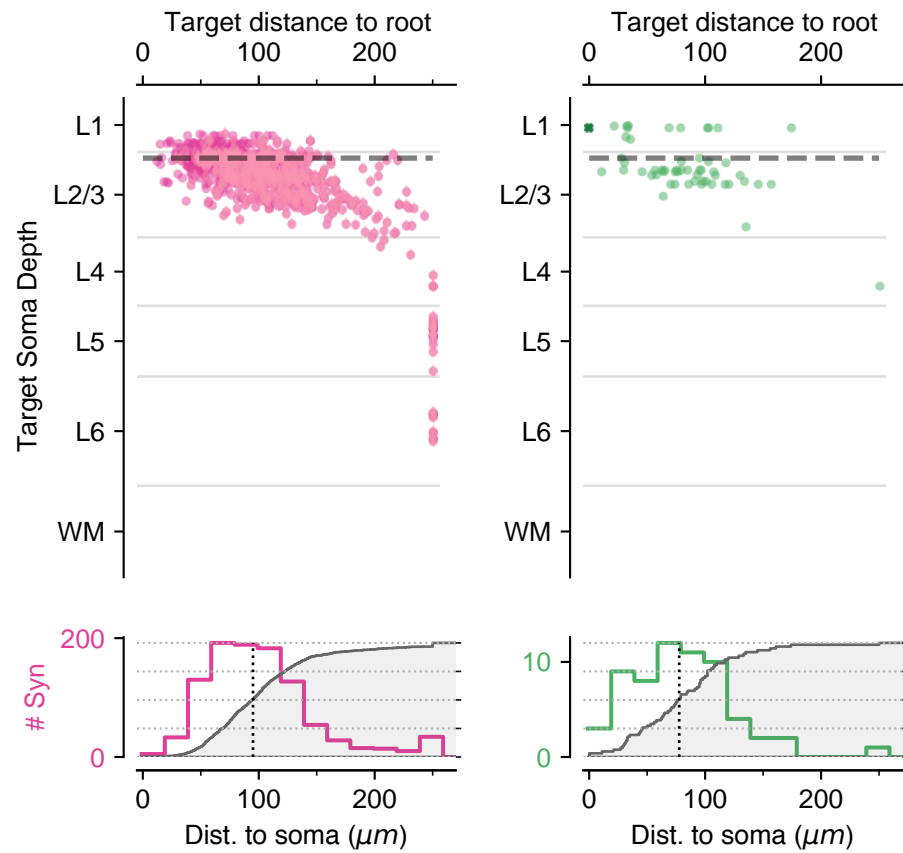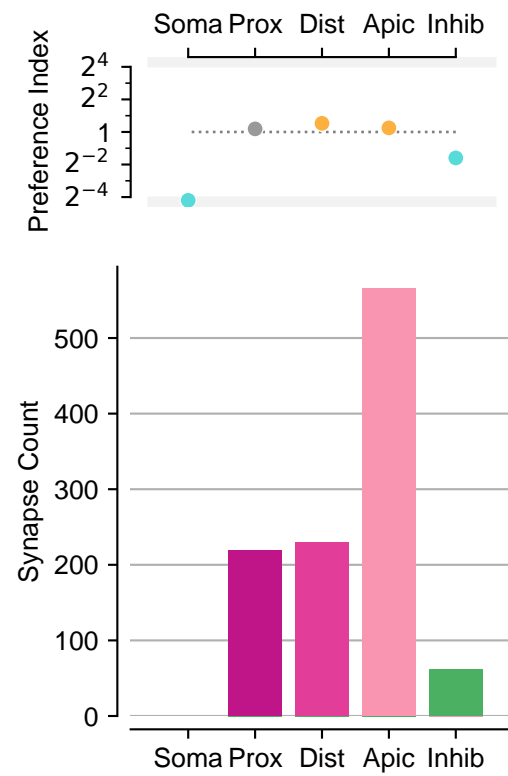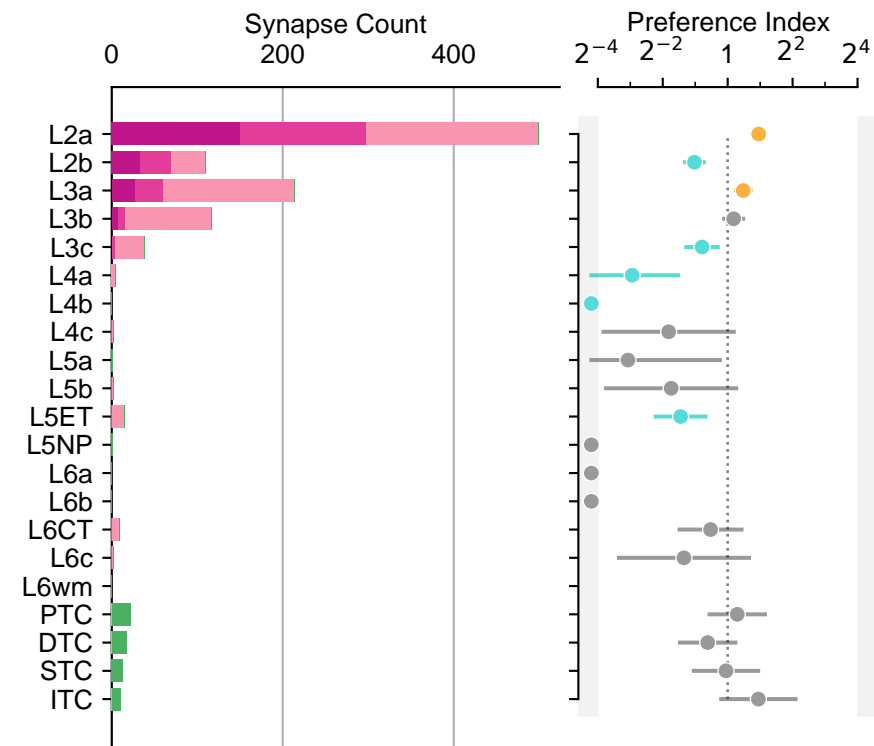

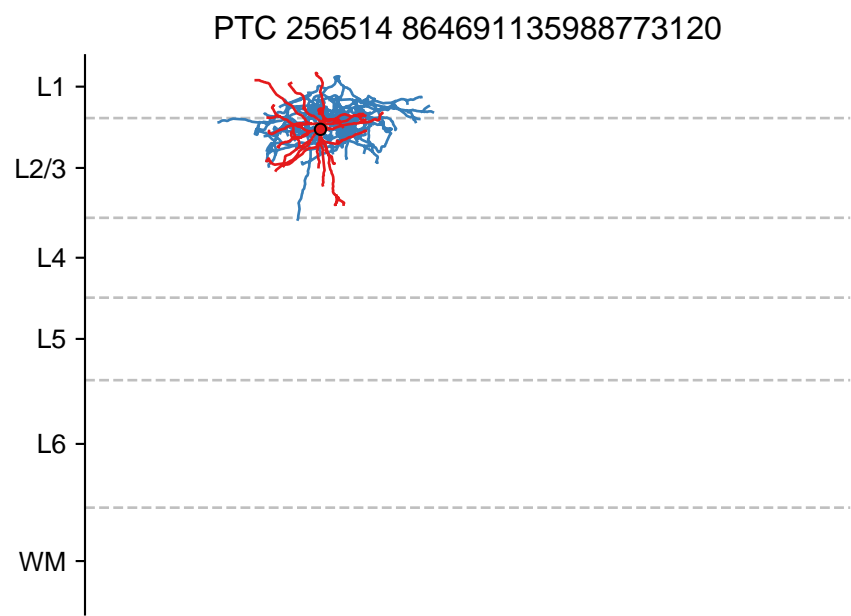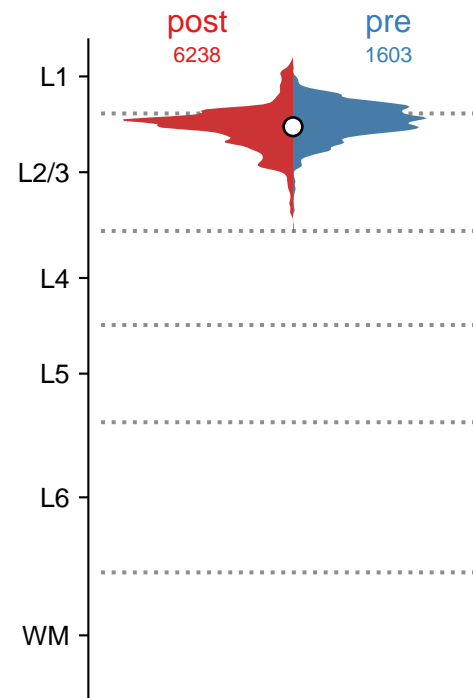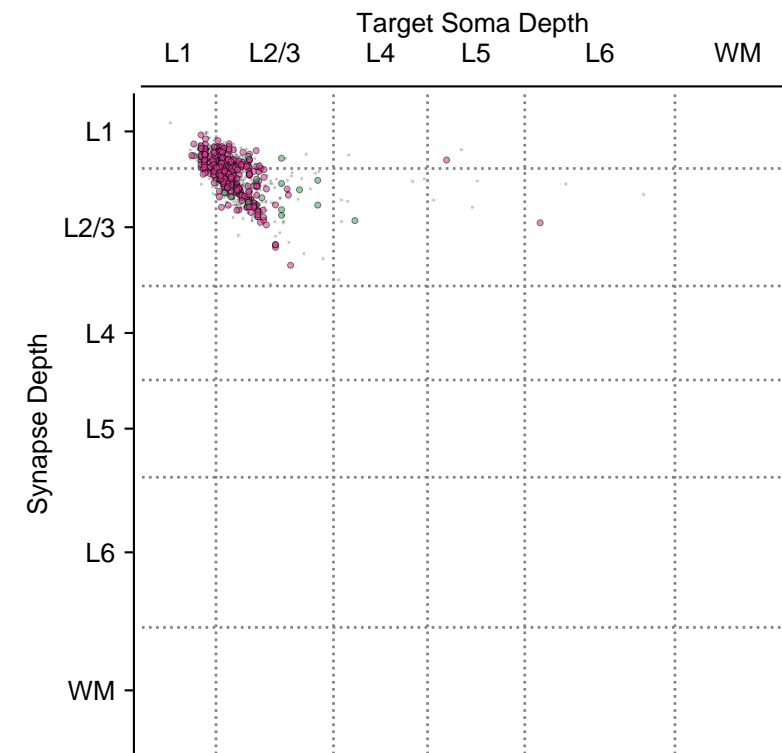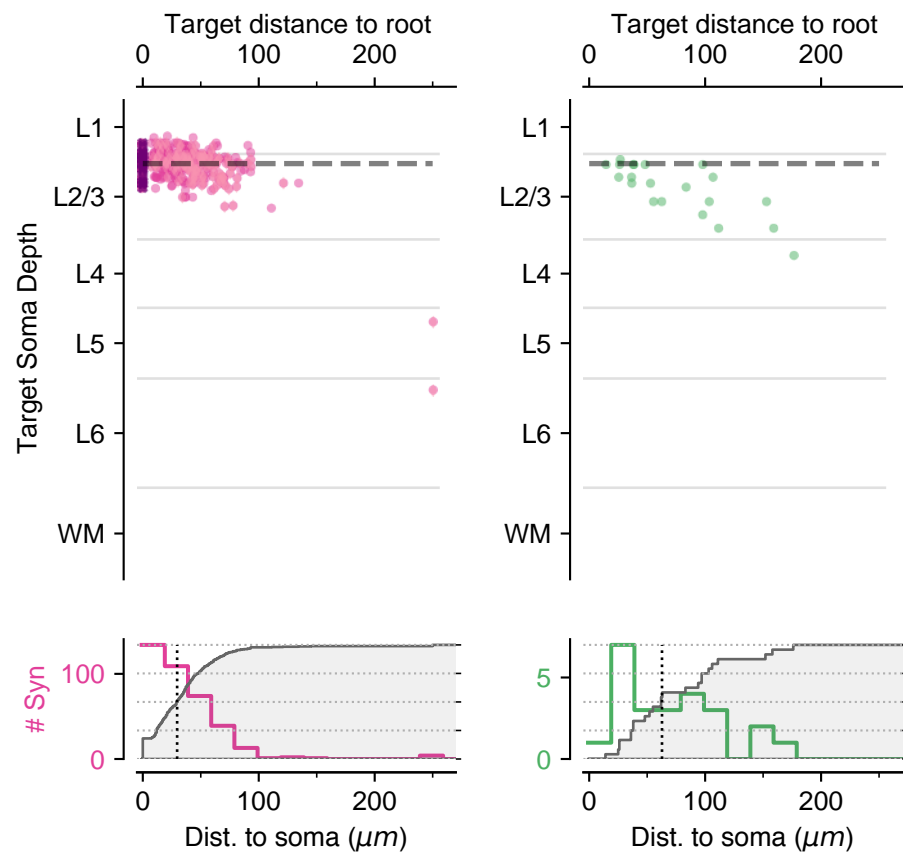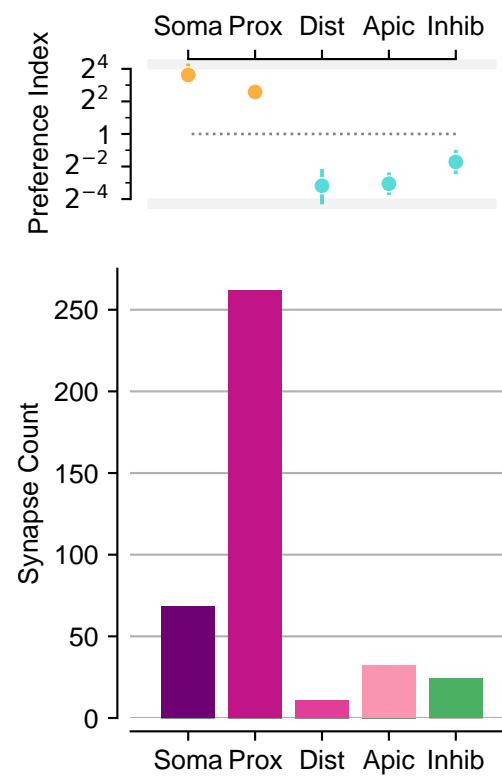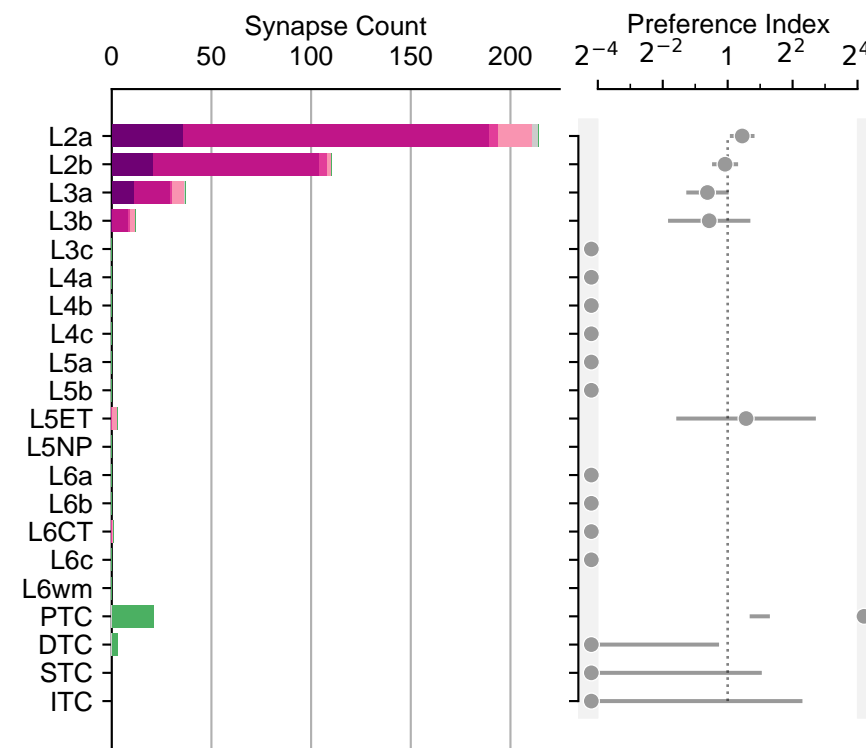

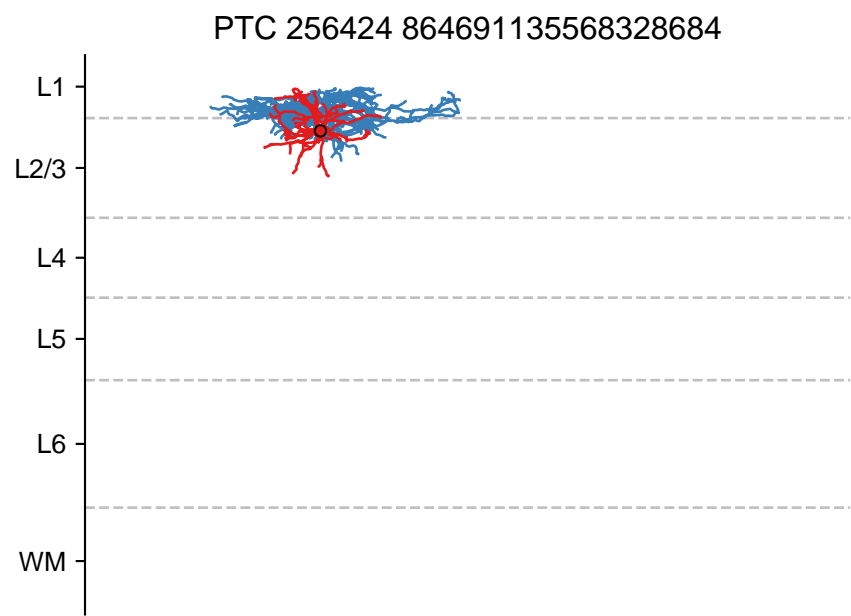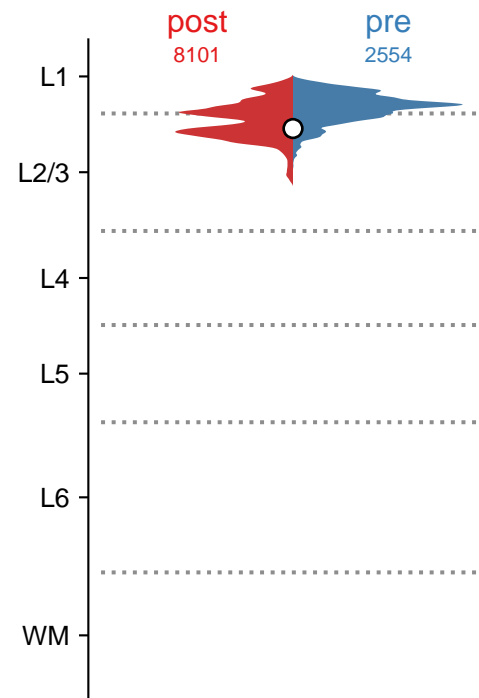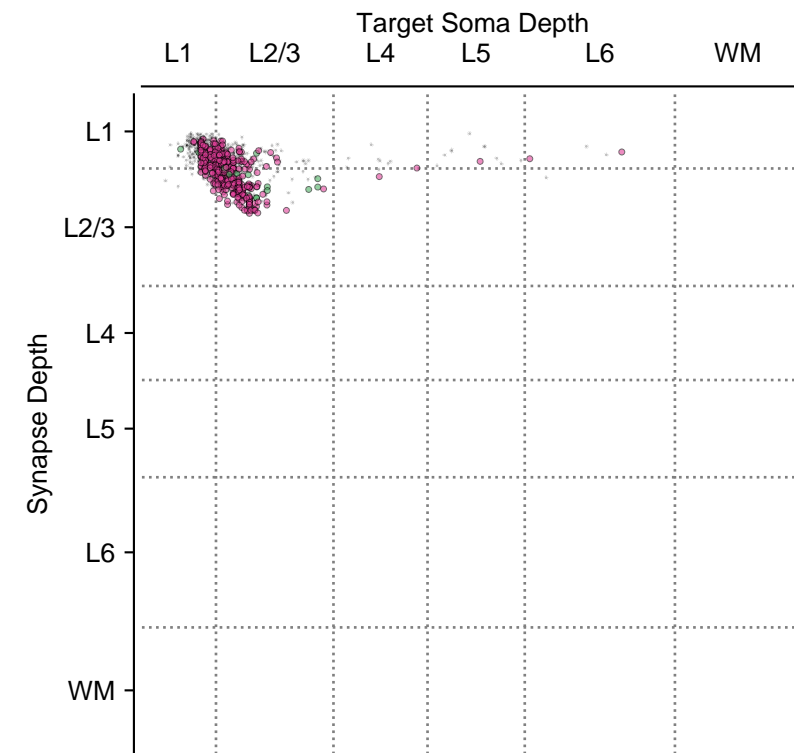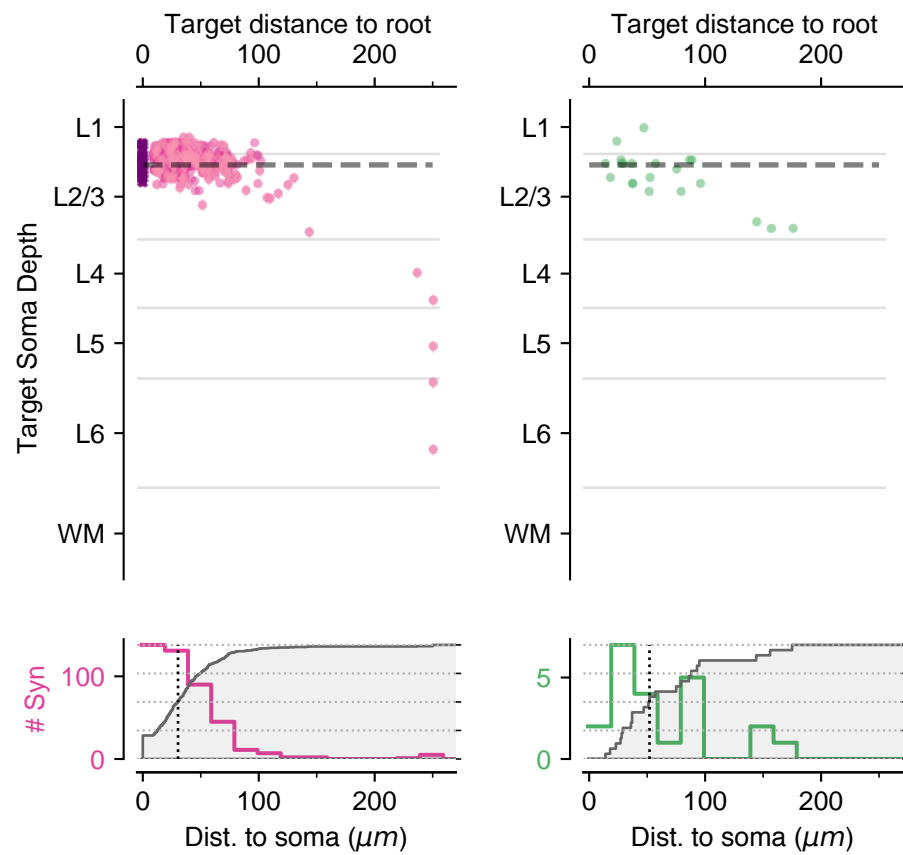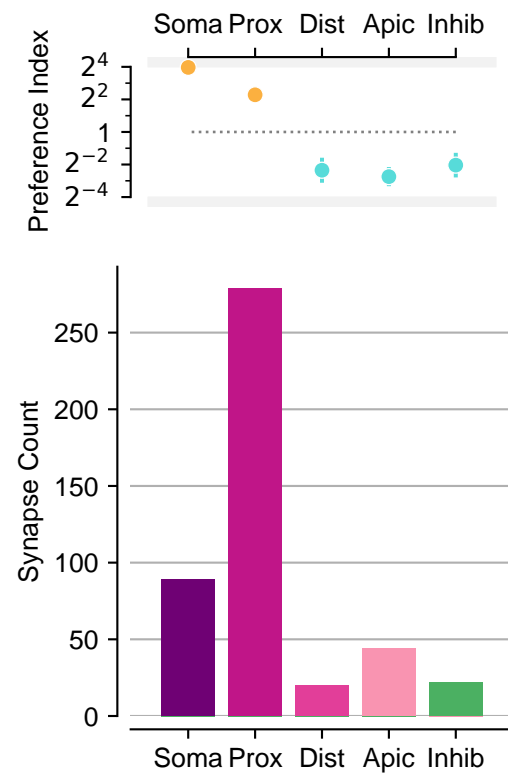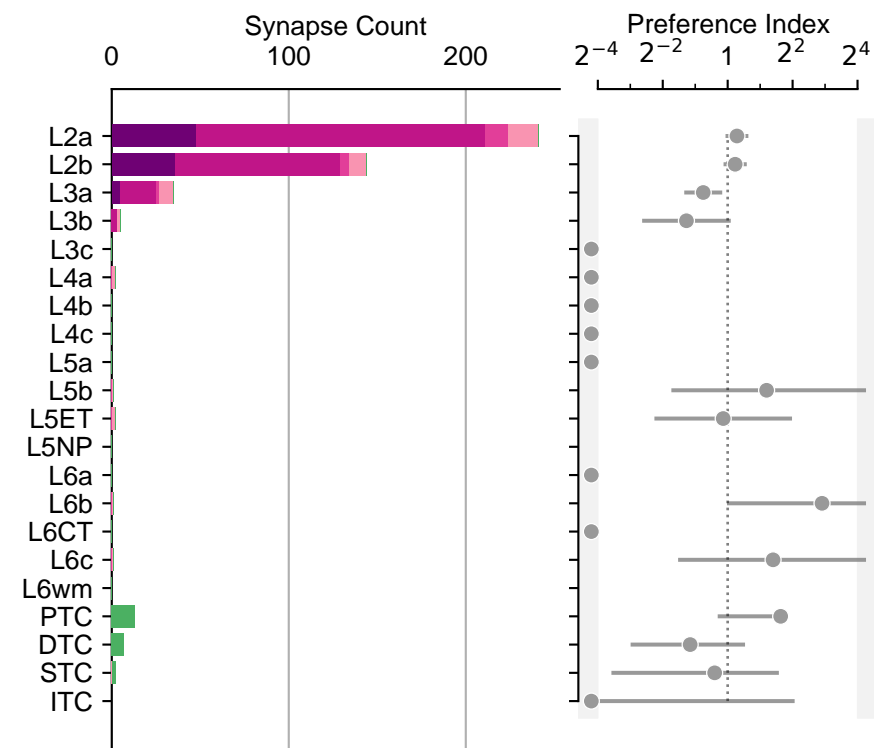

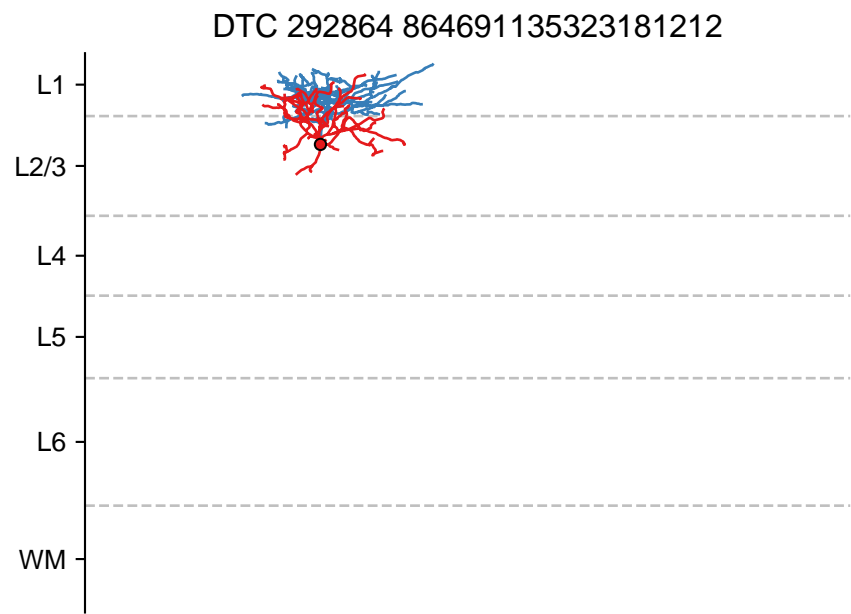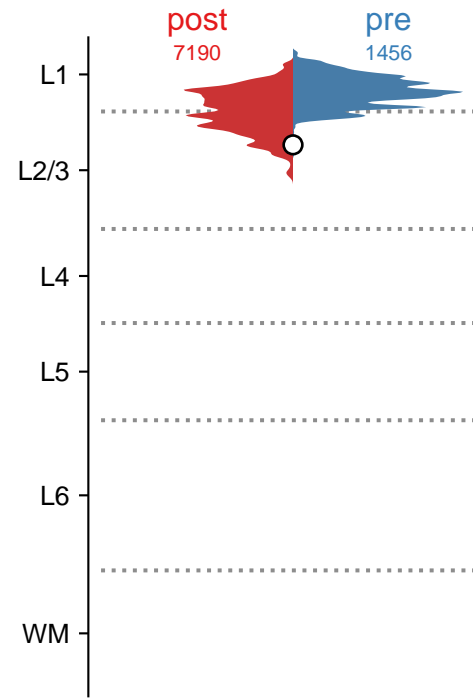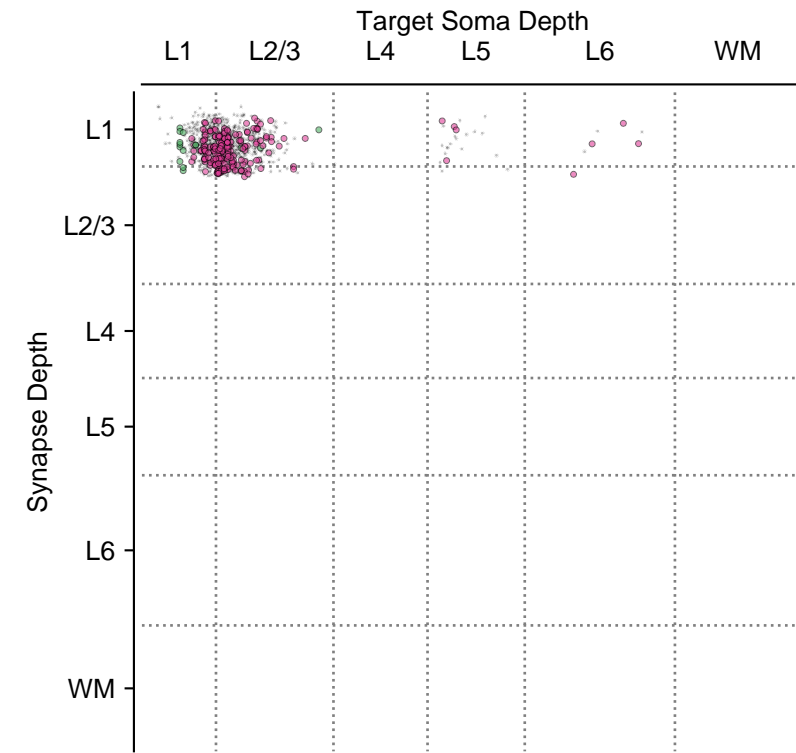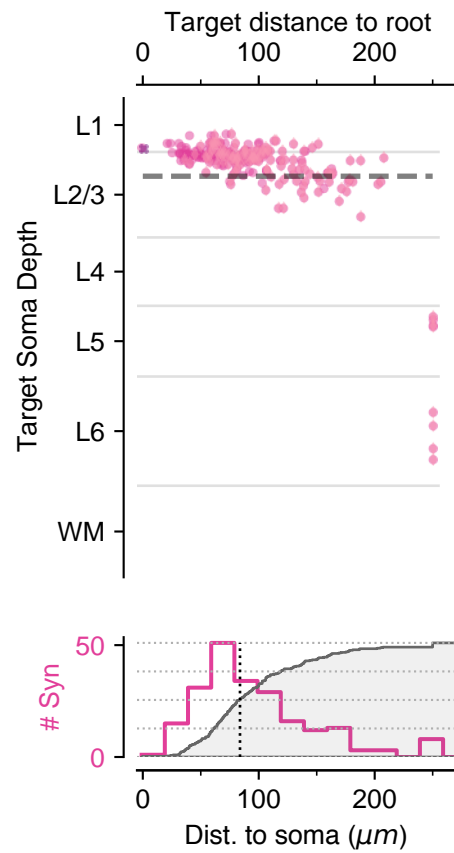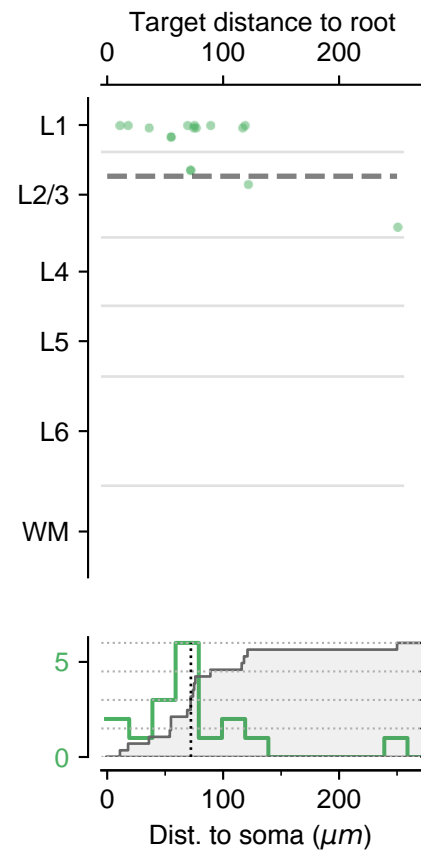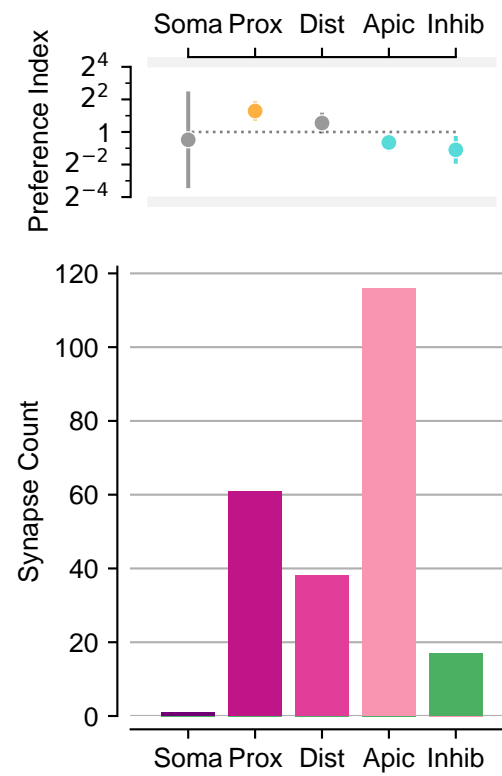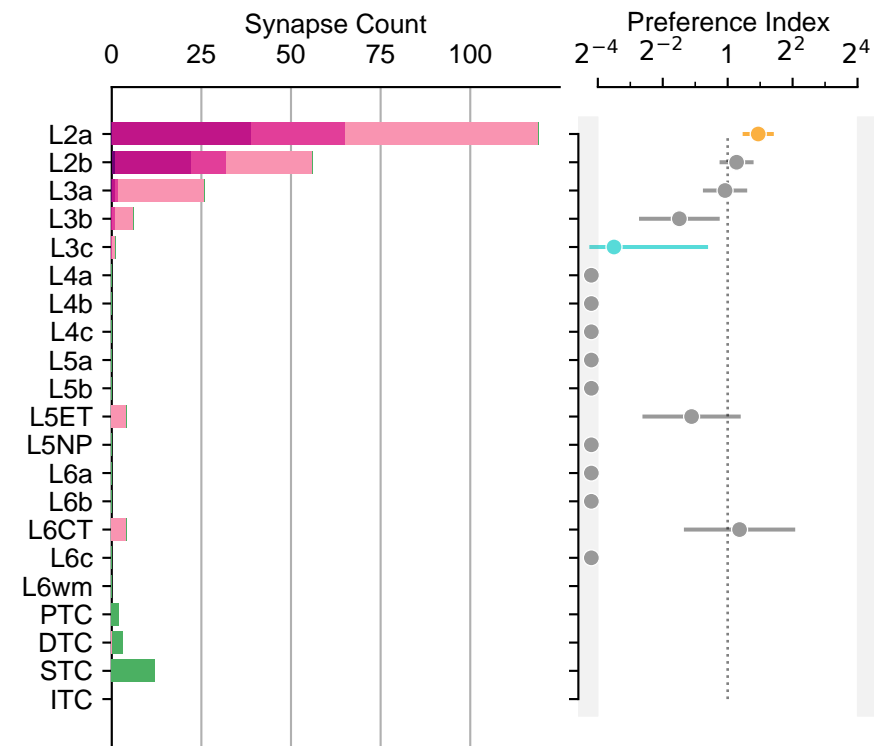

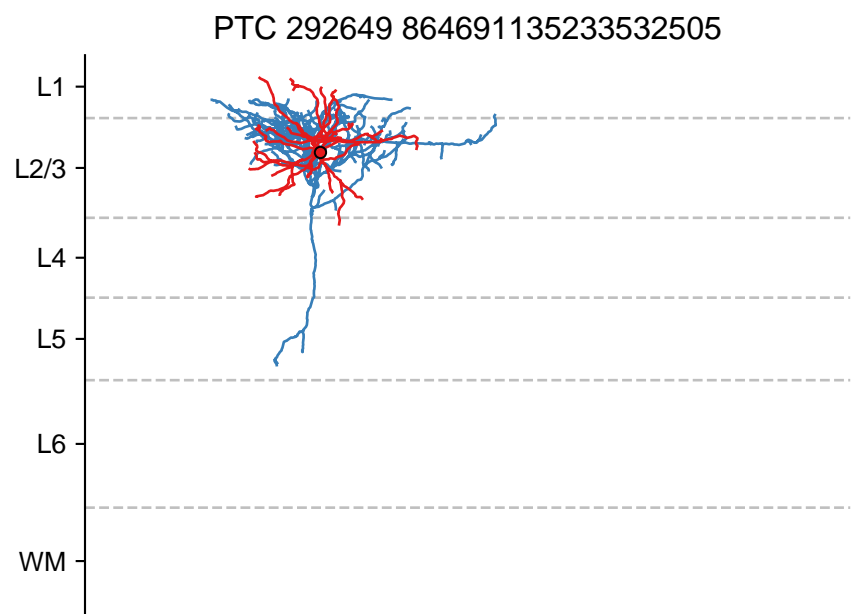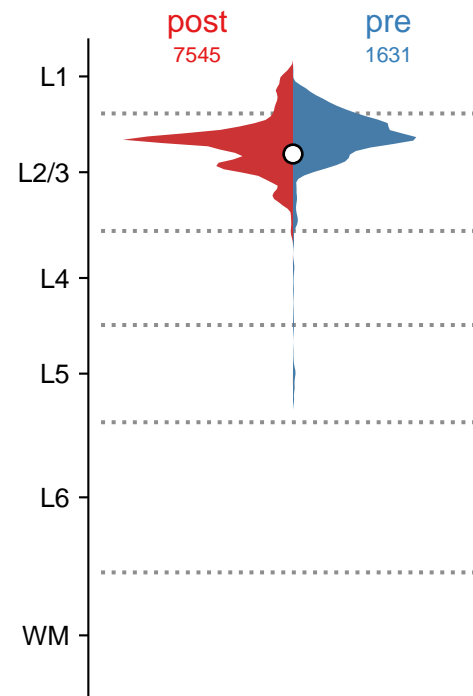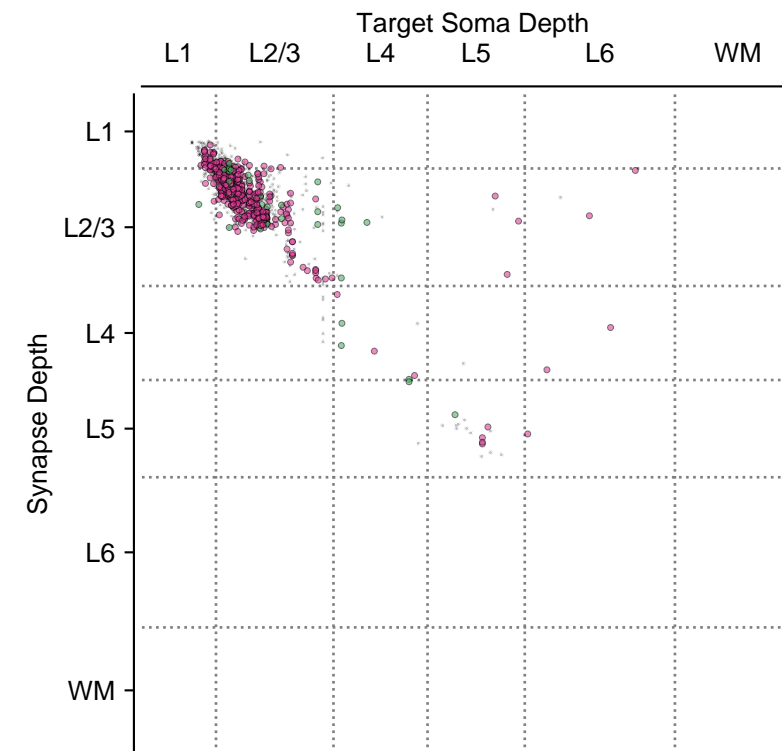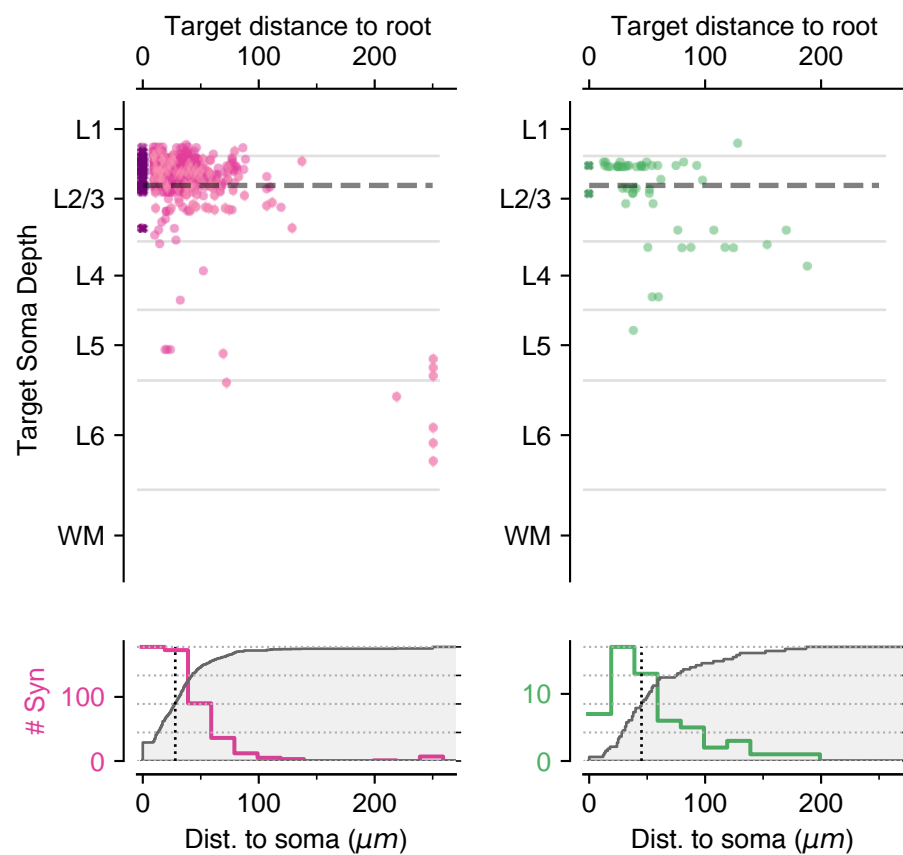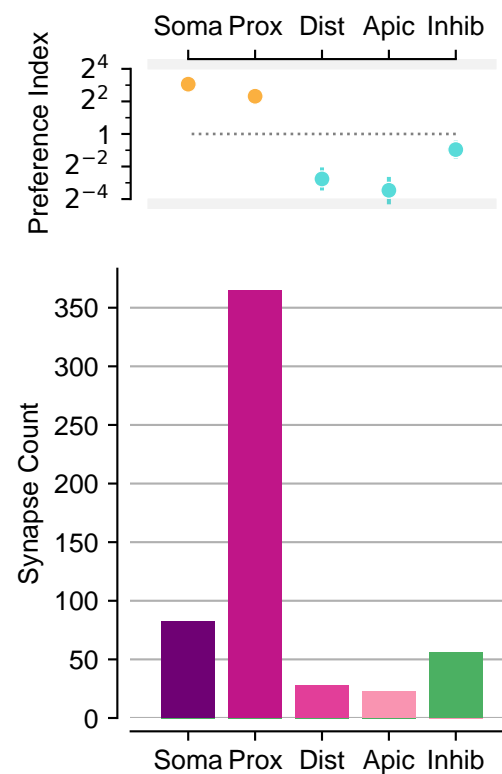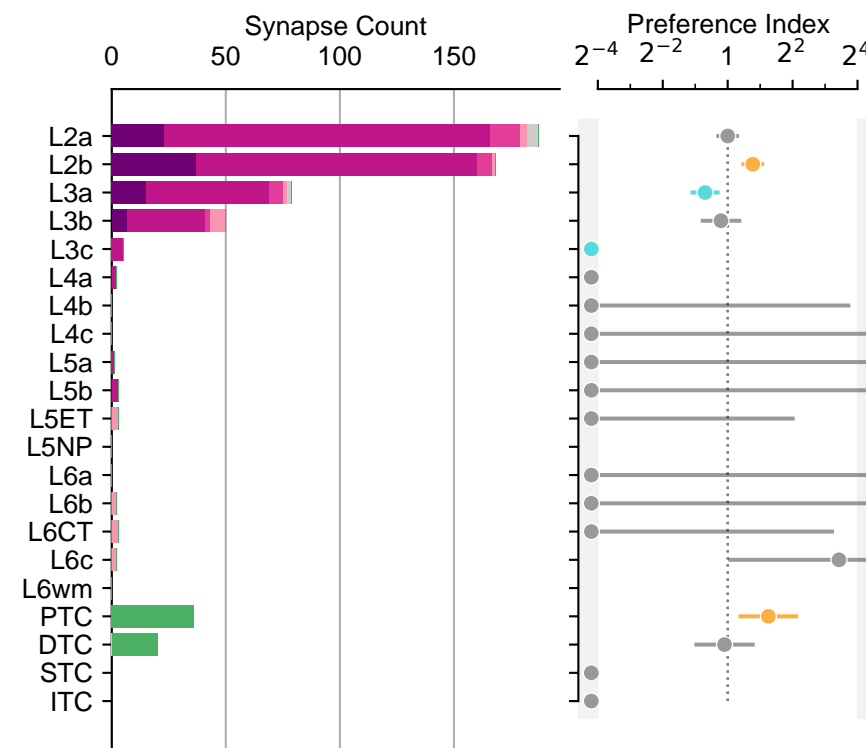

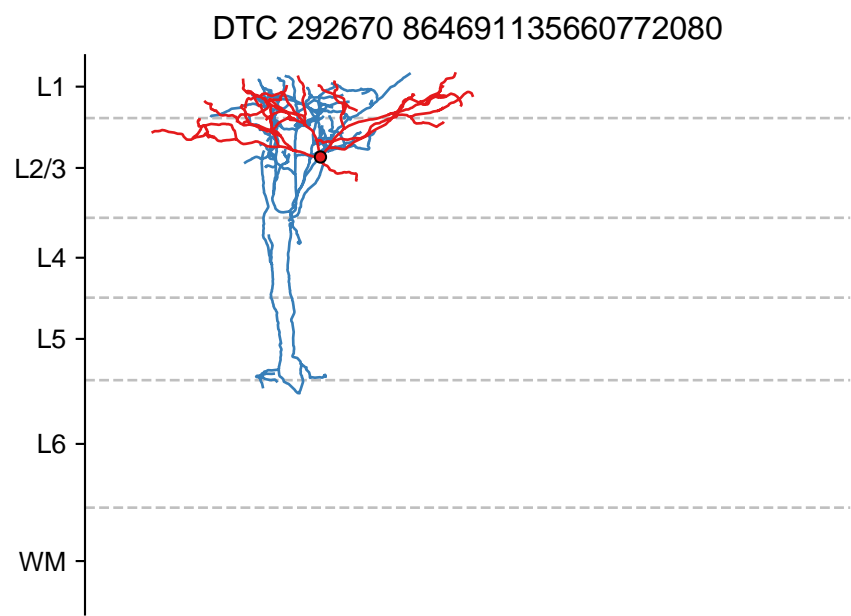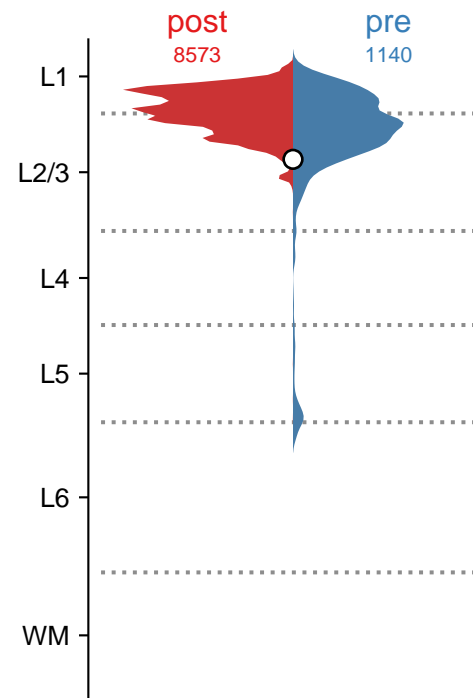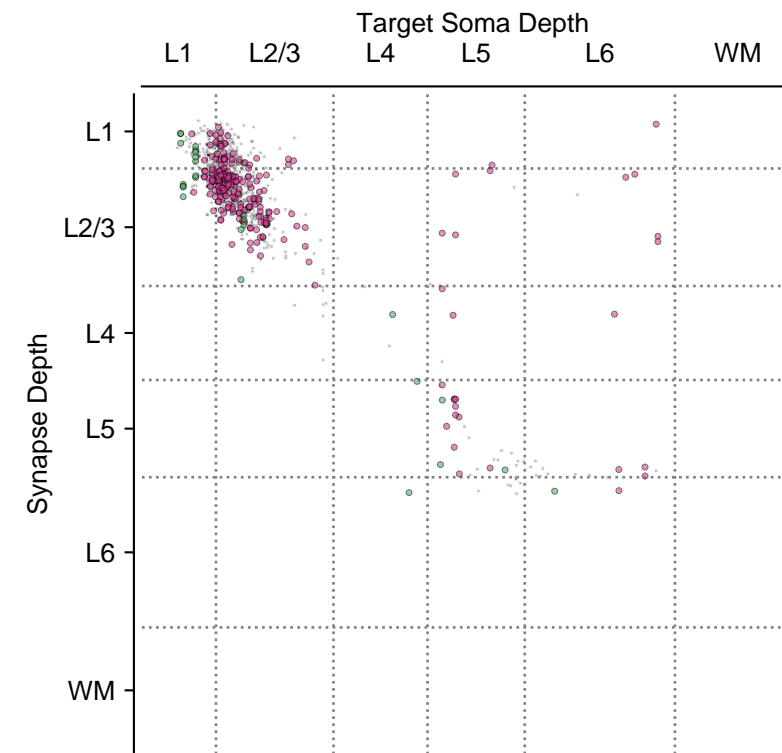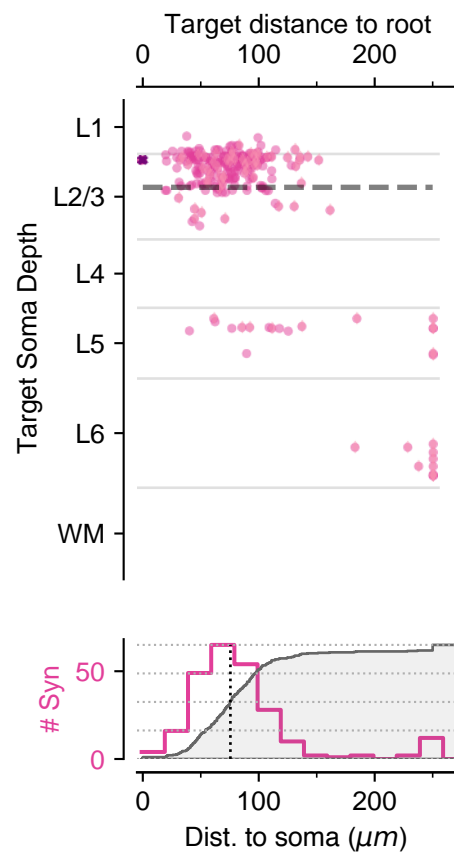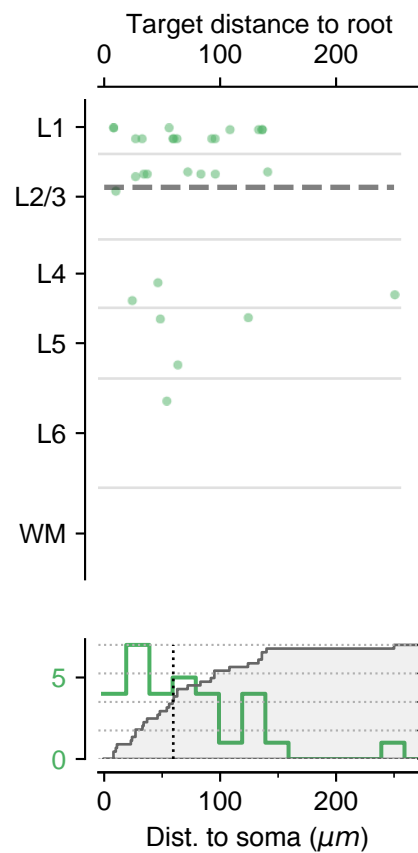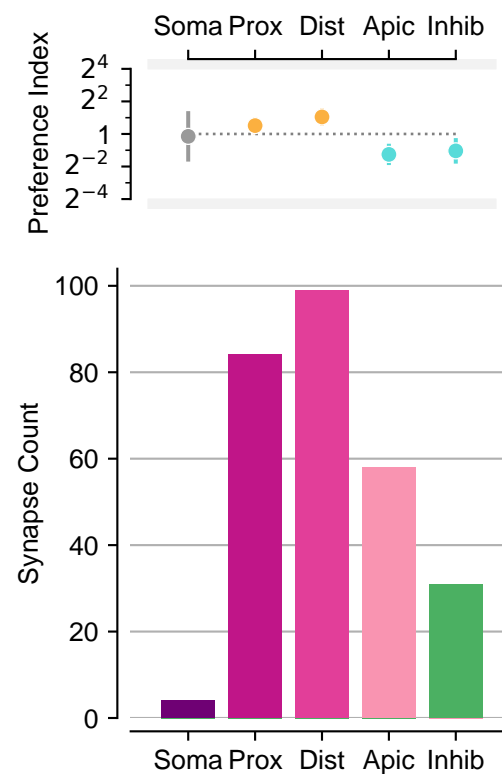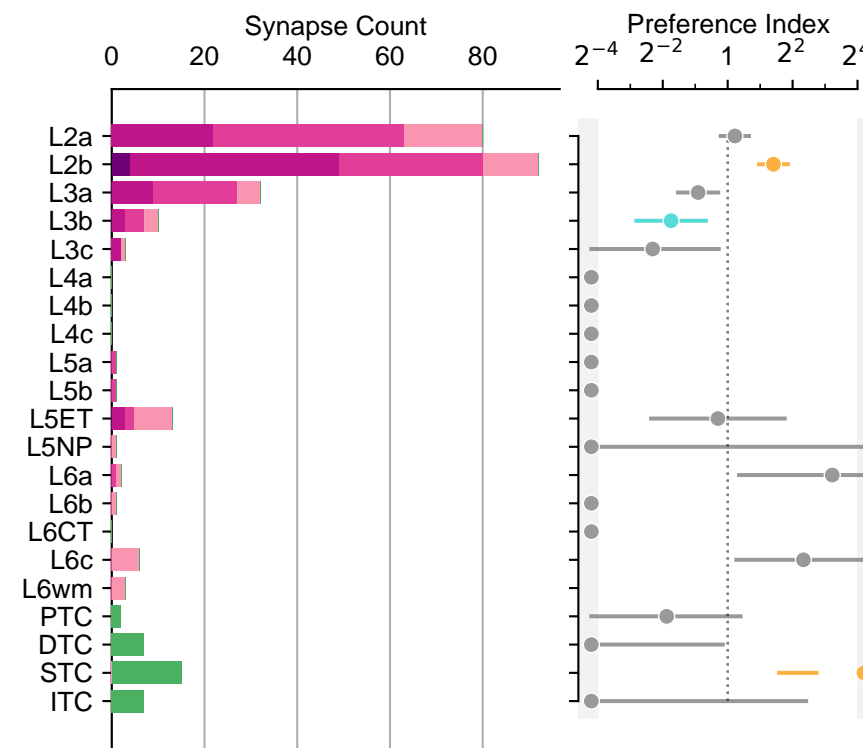



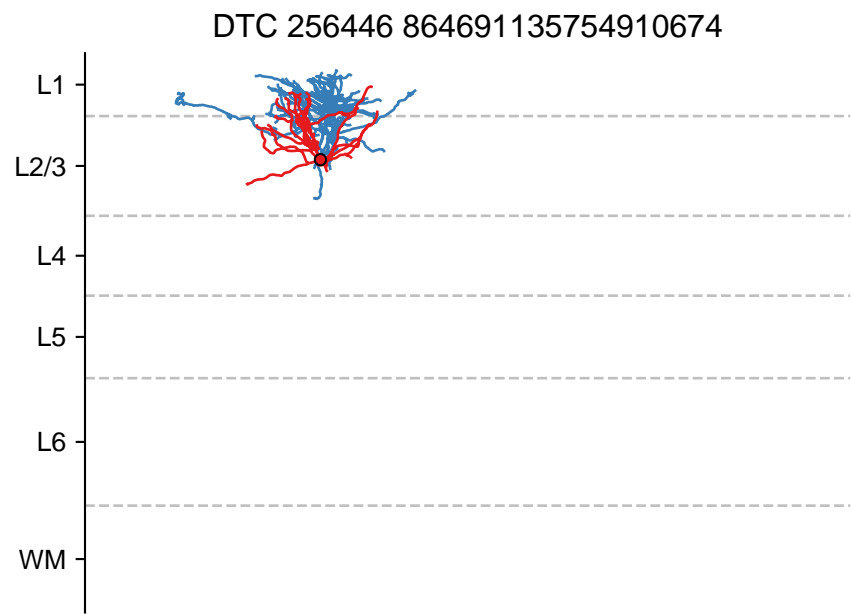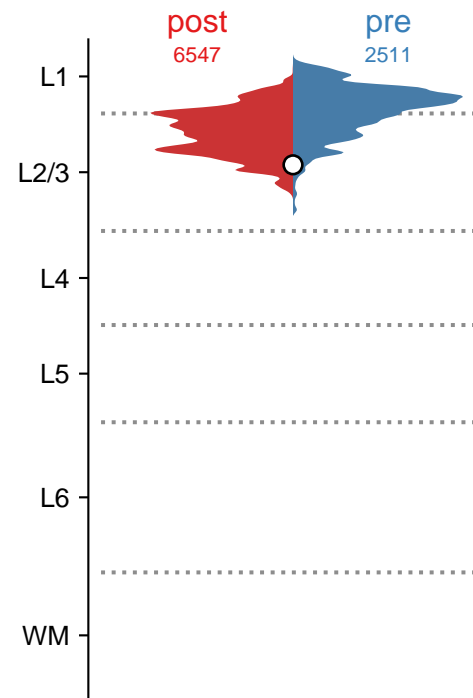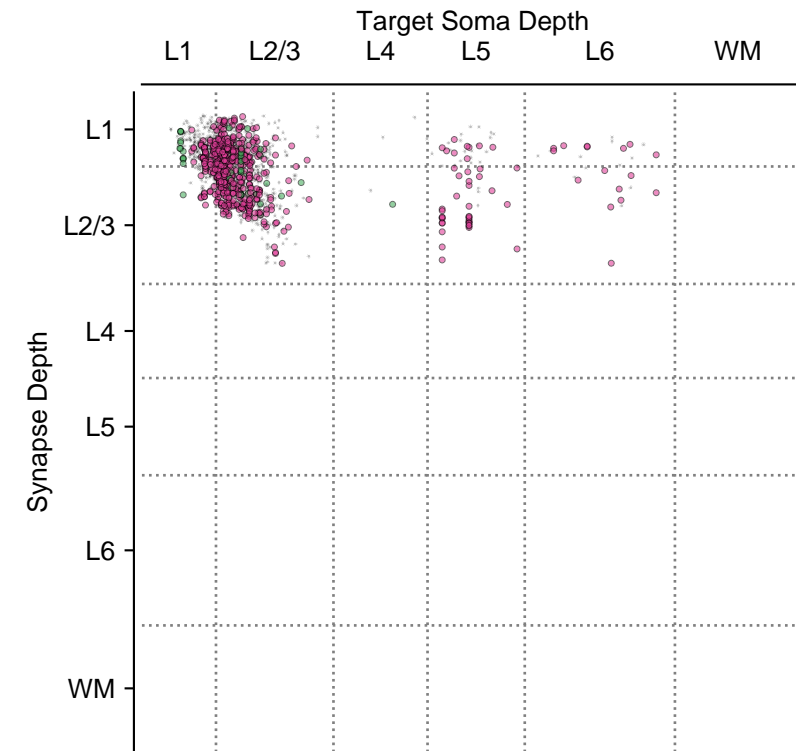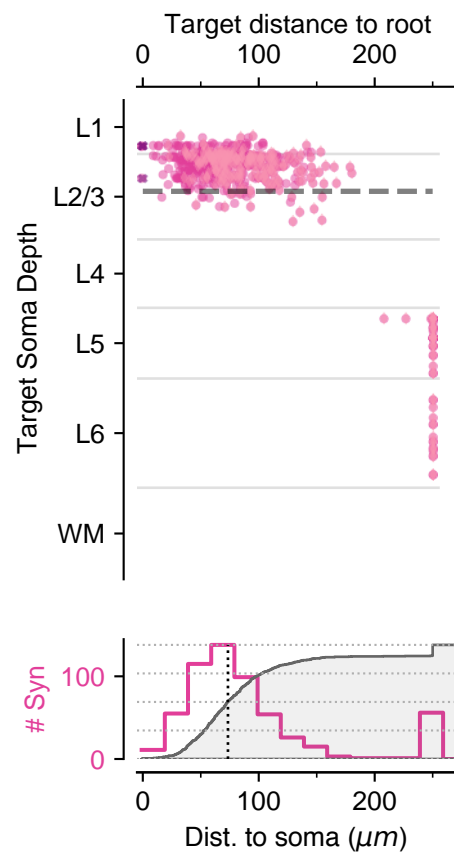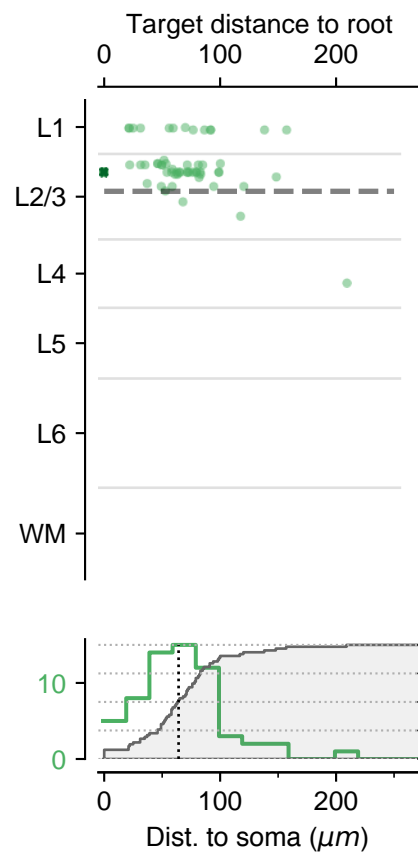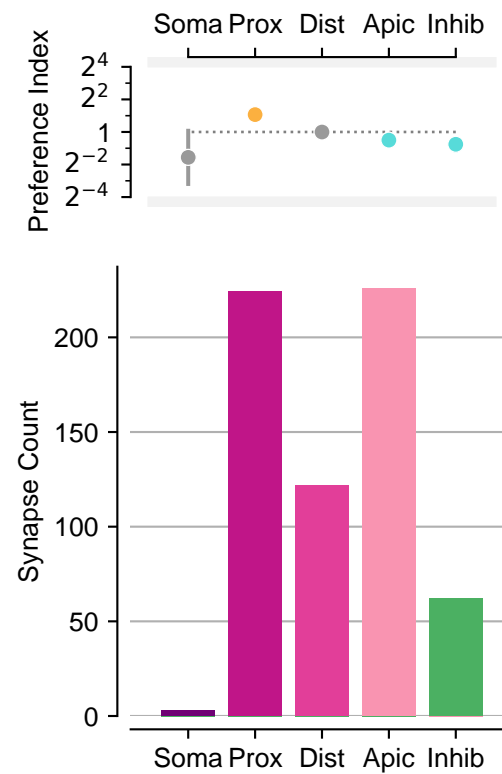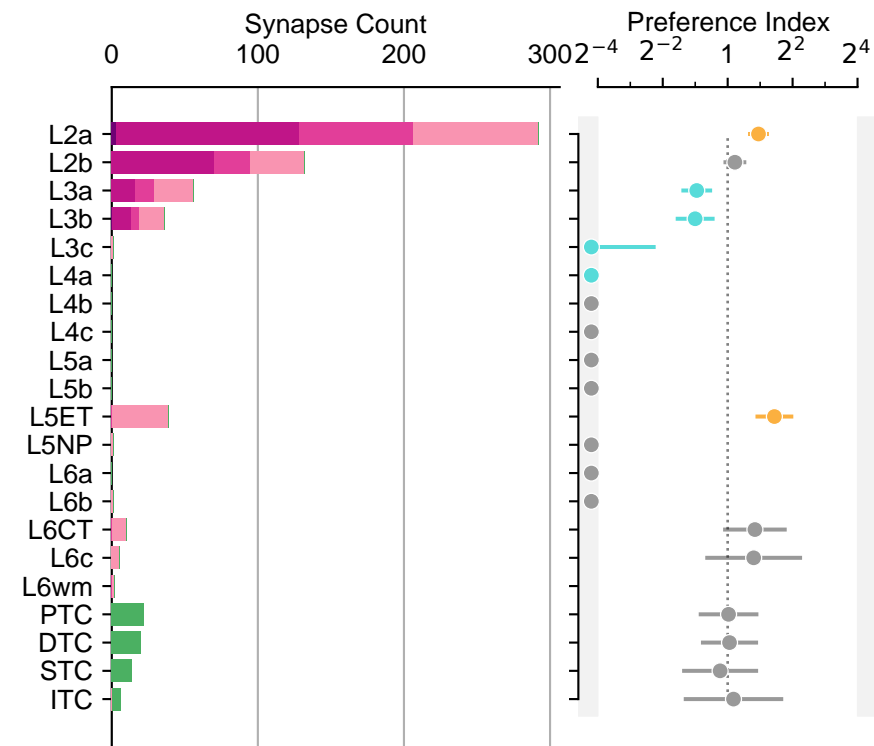

# Group 2

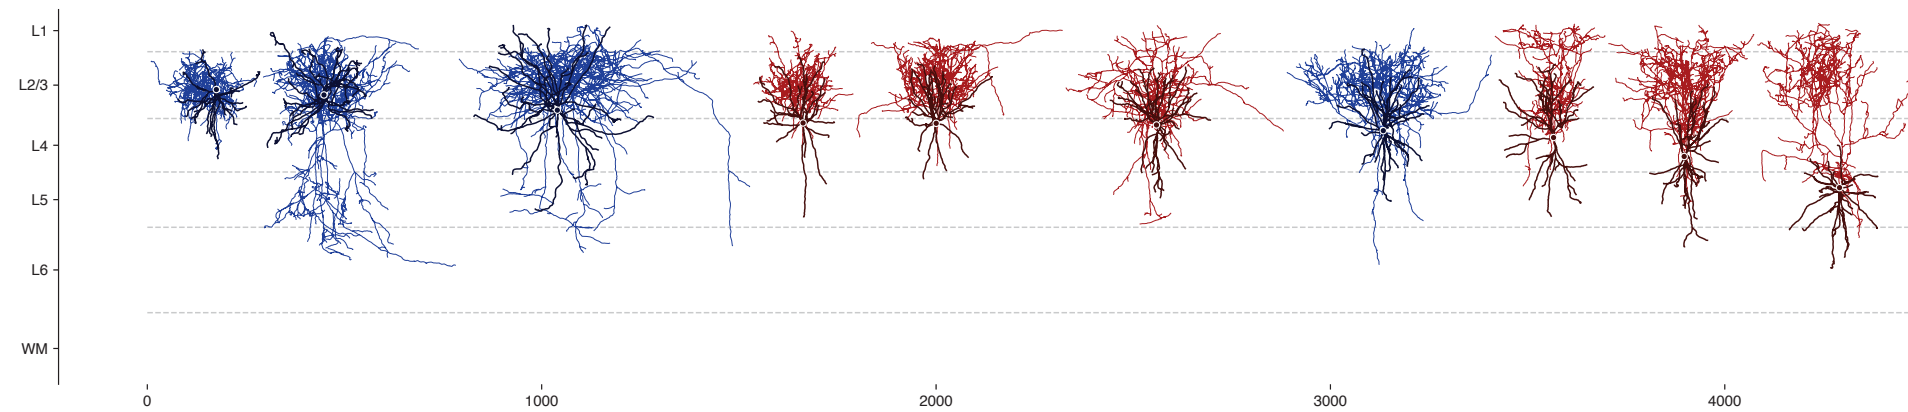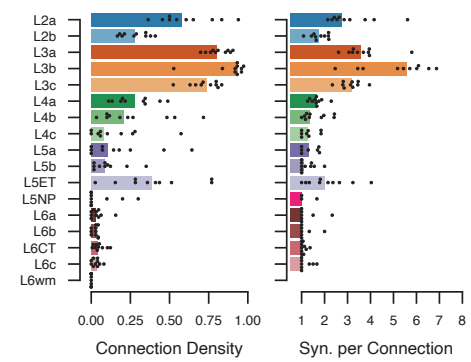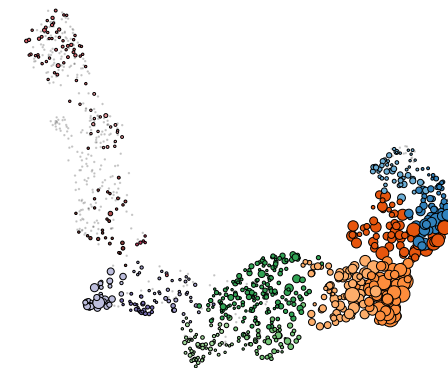

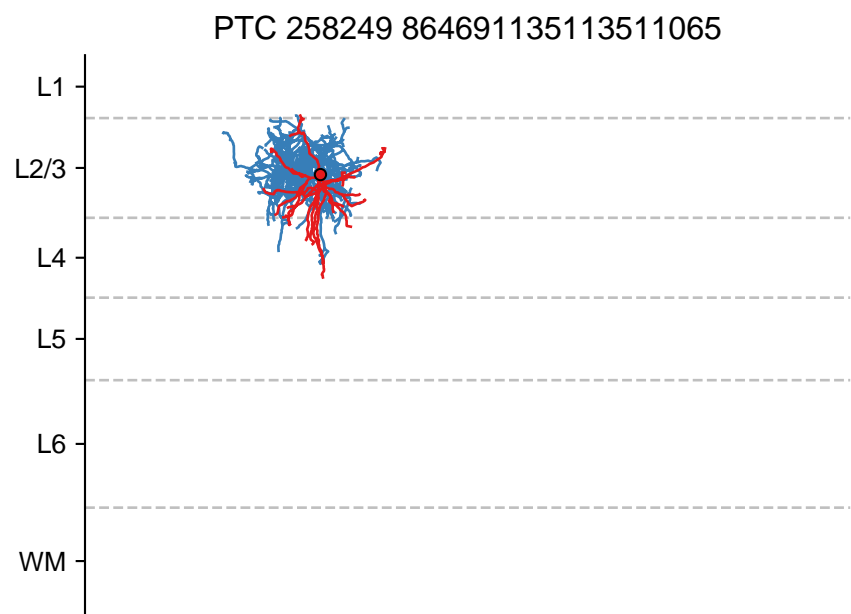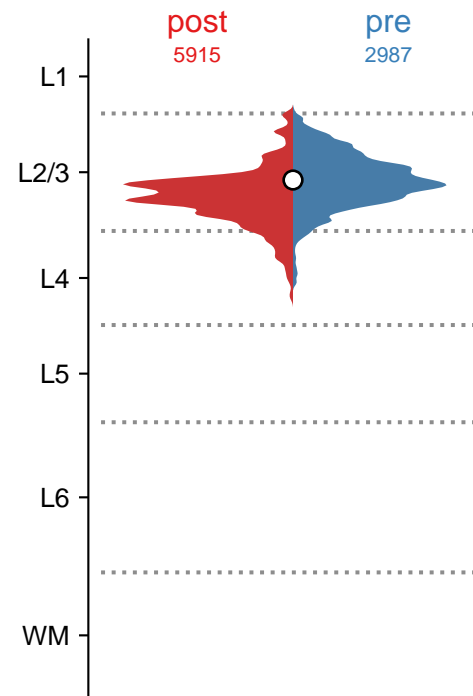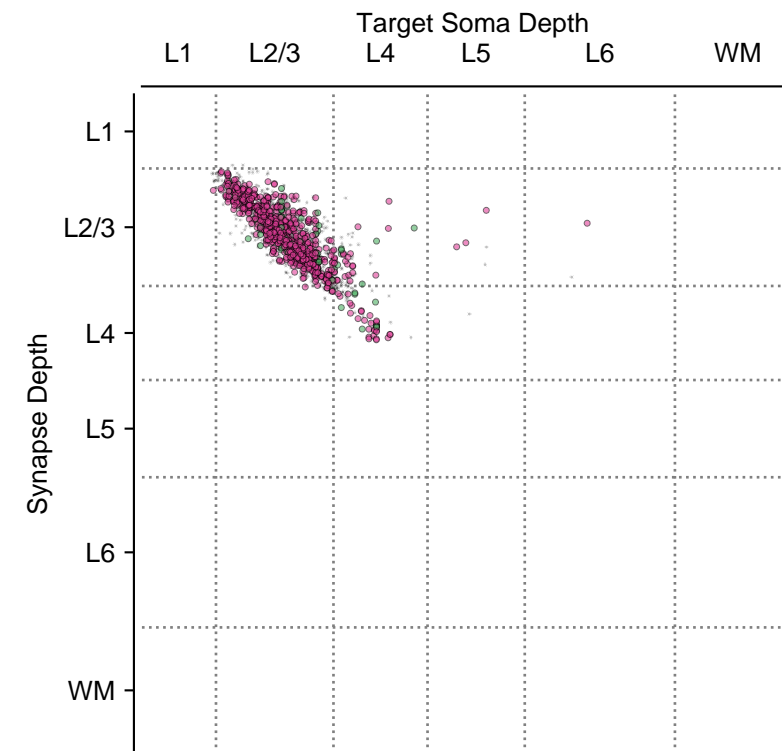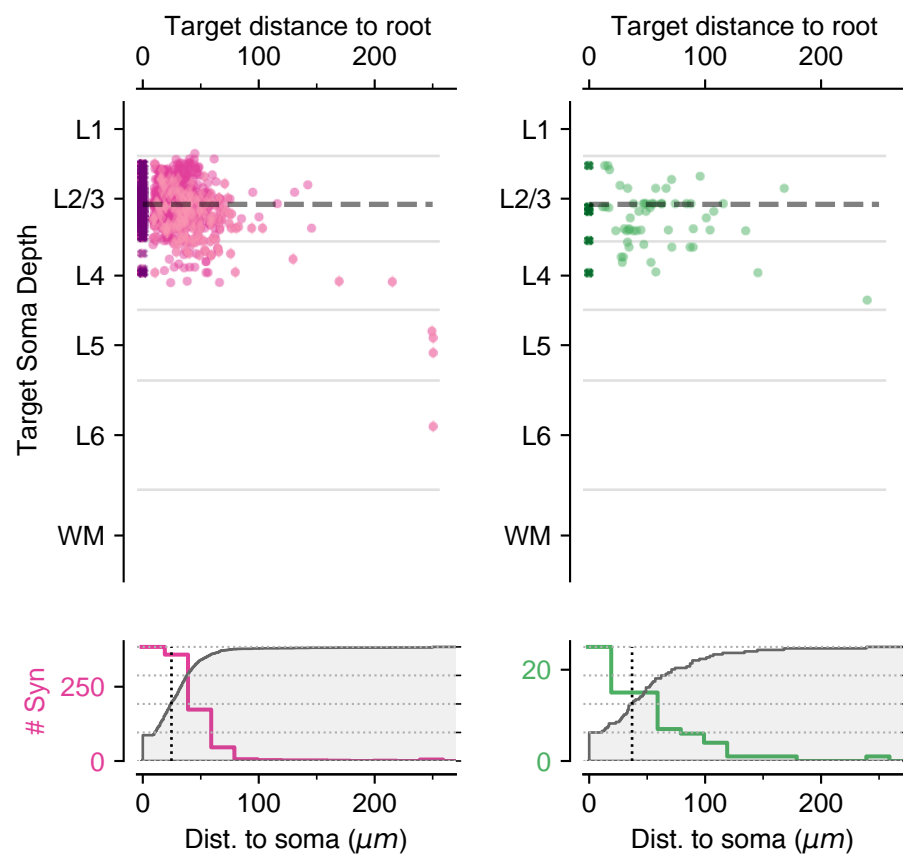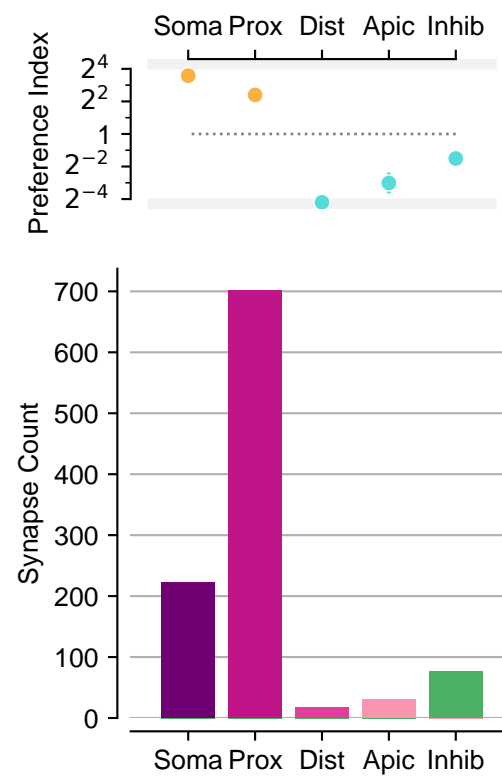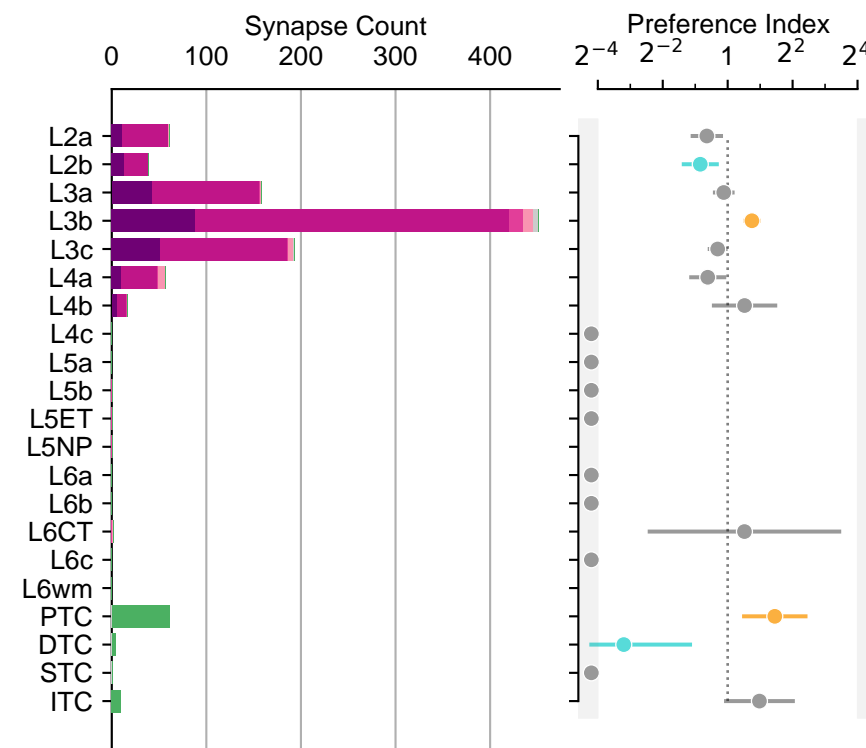

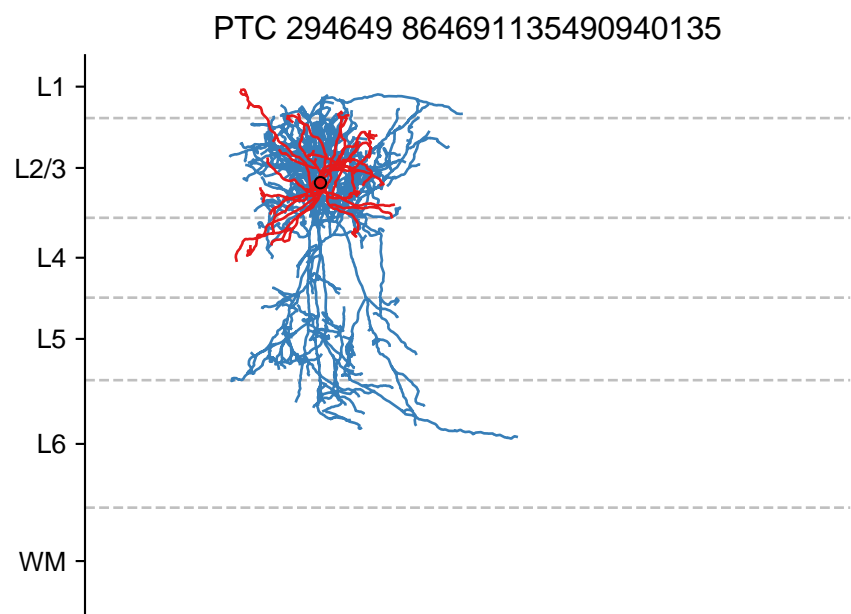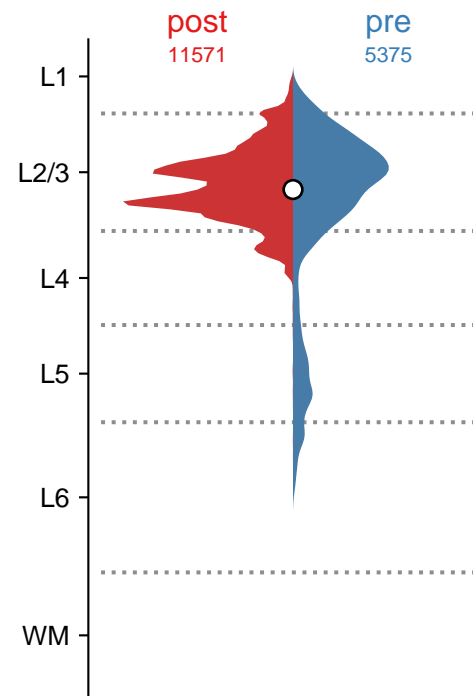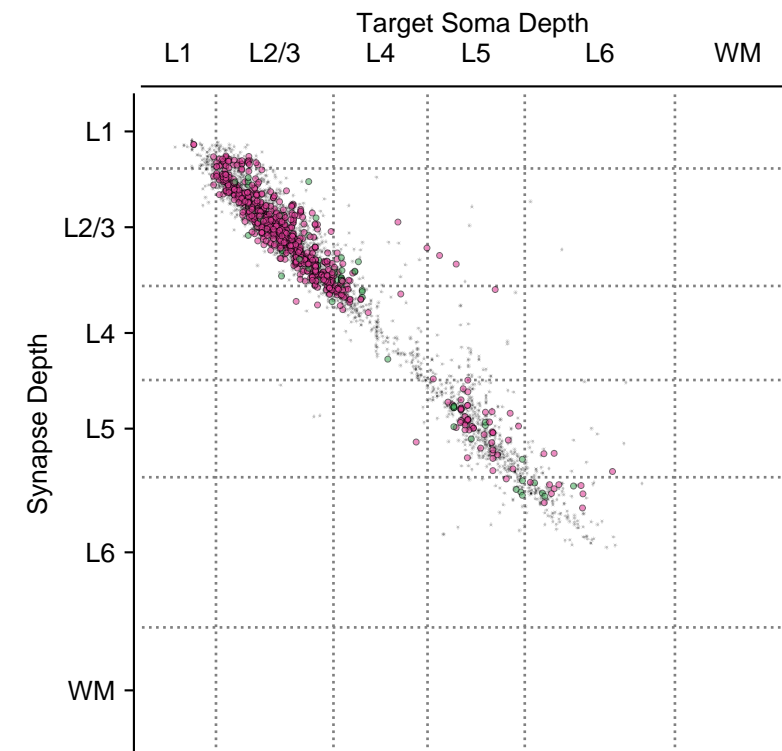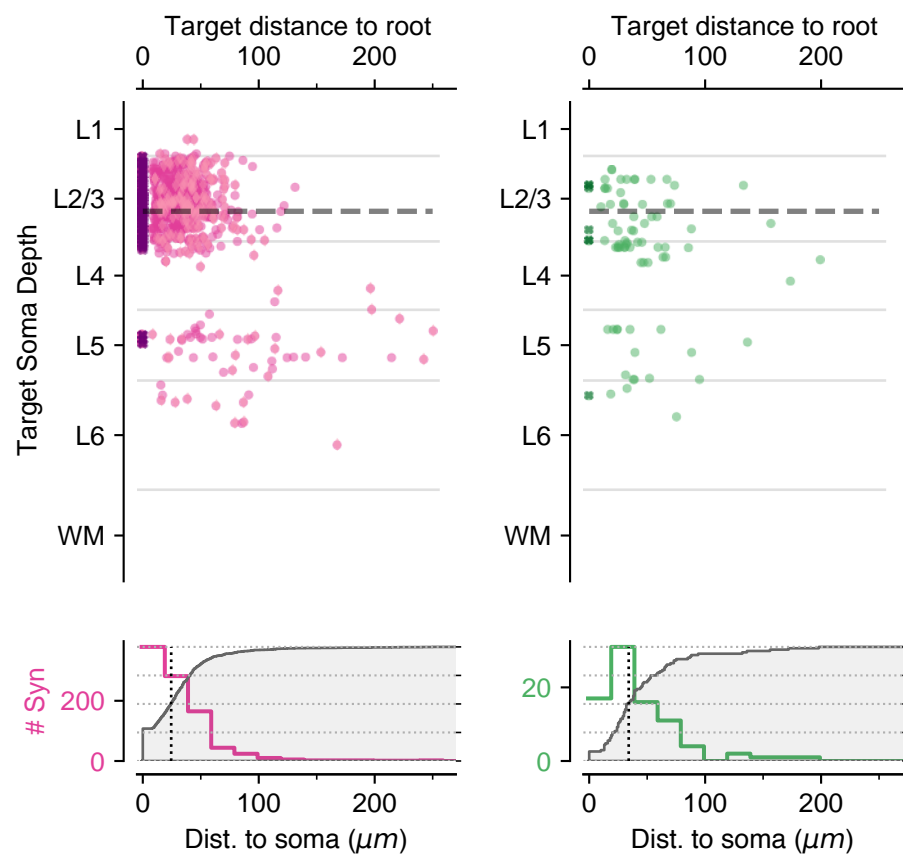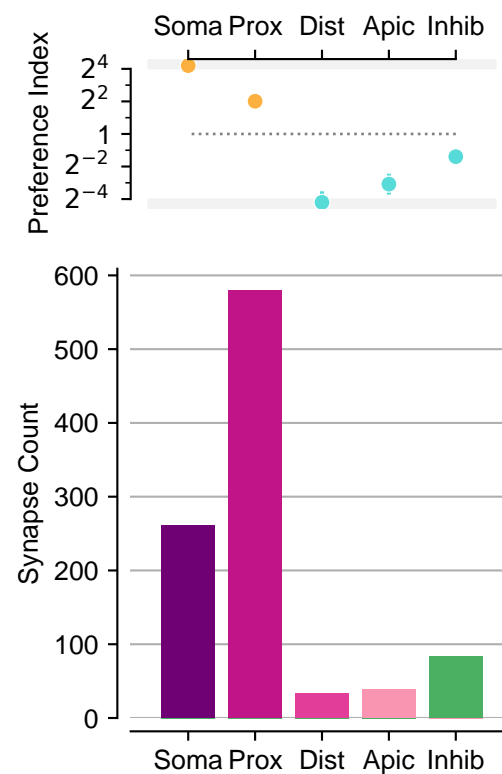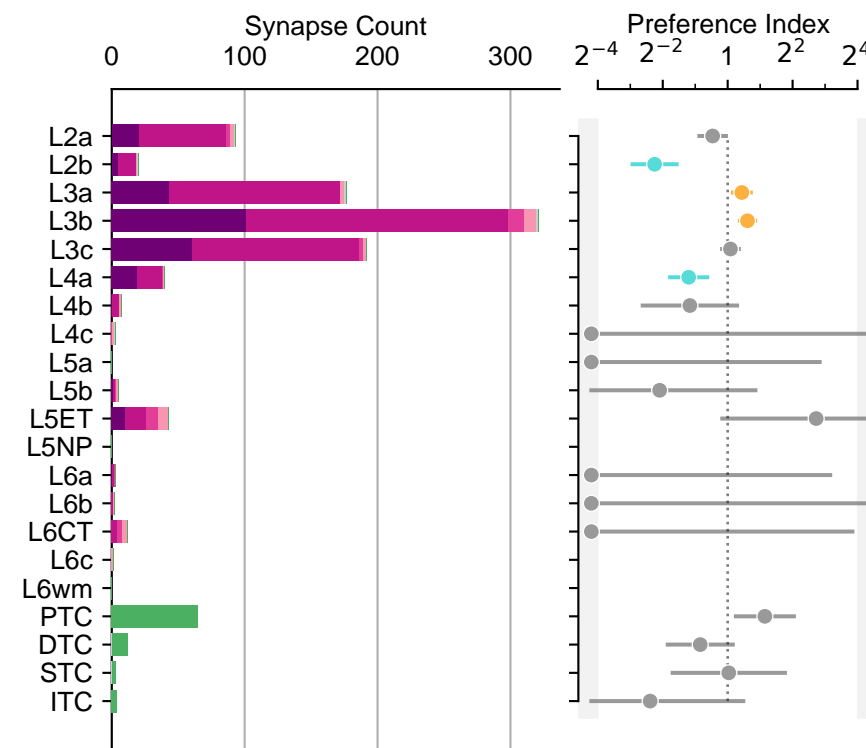

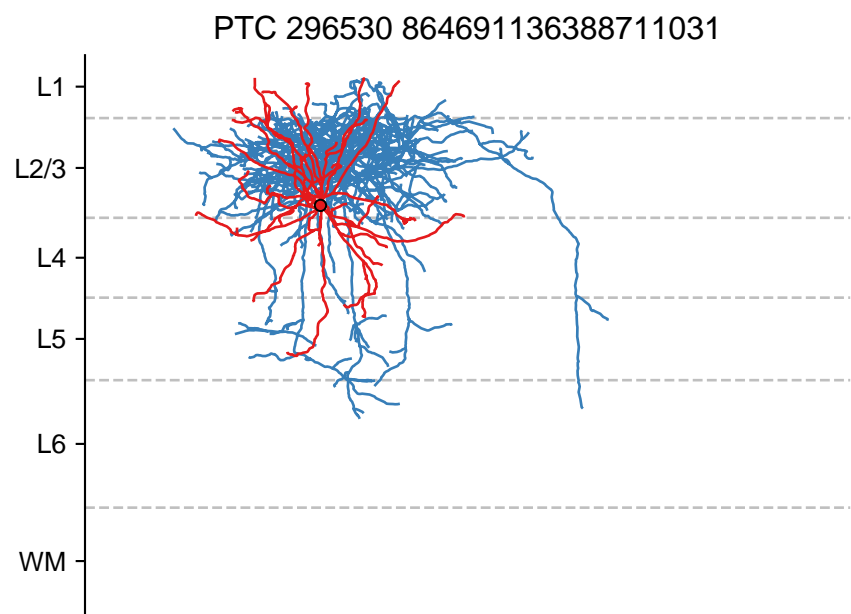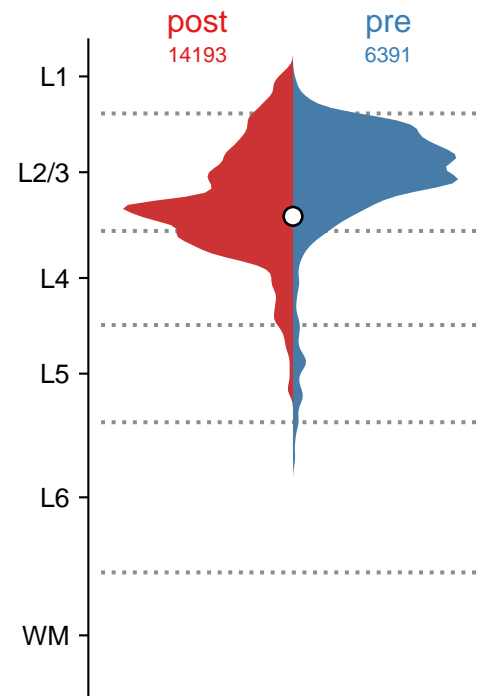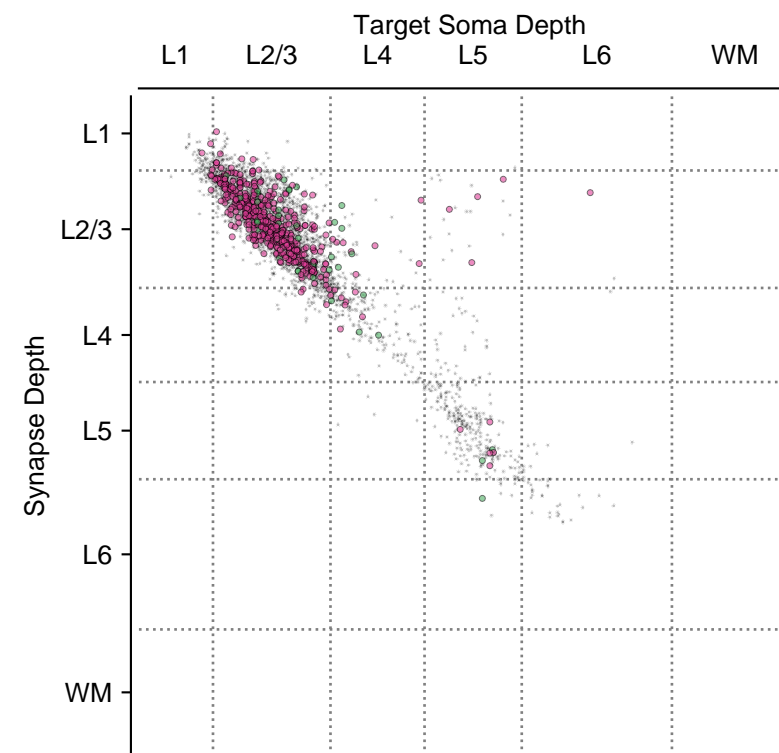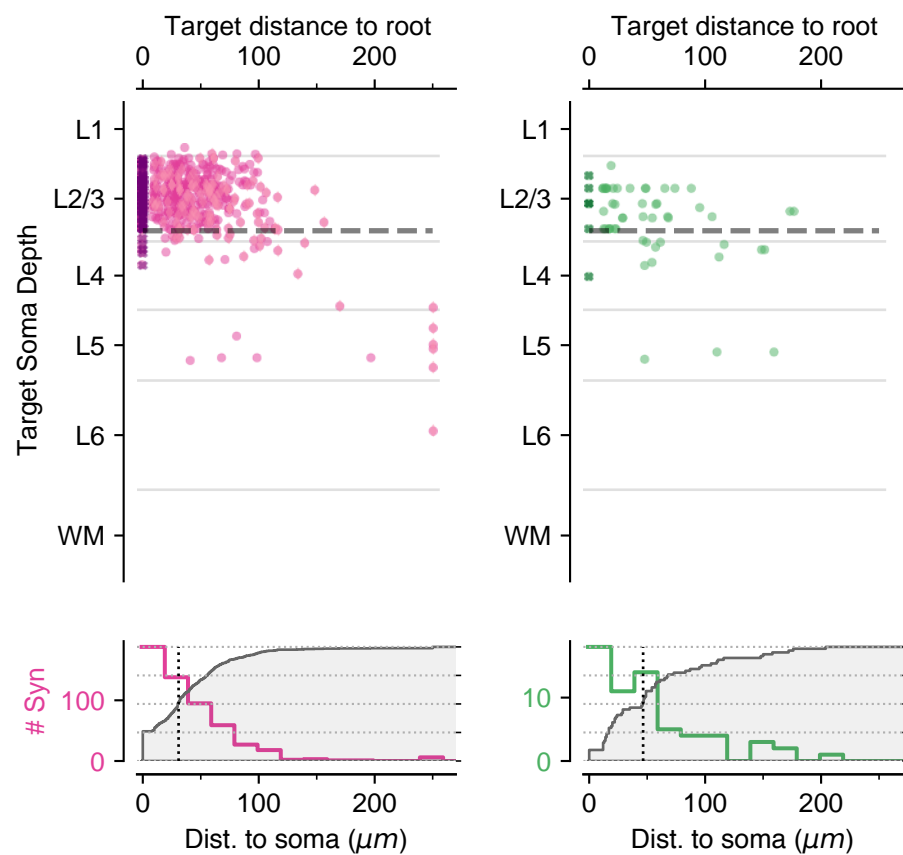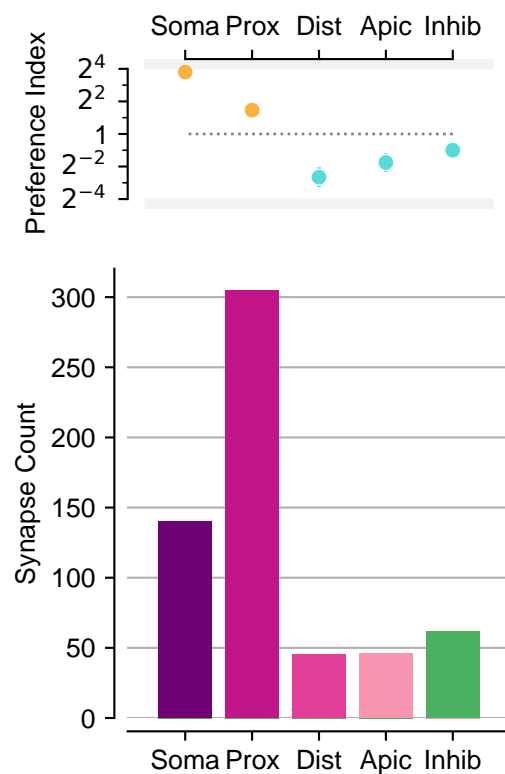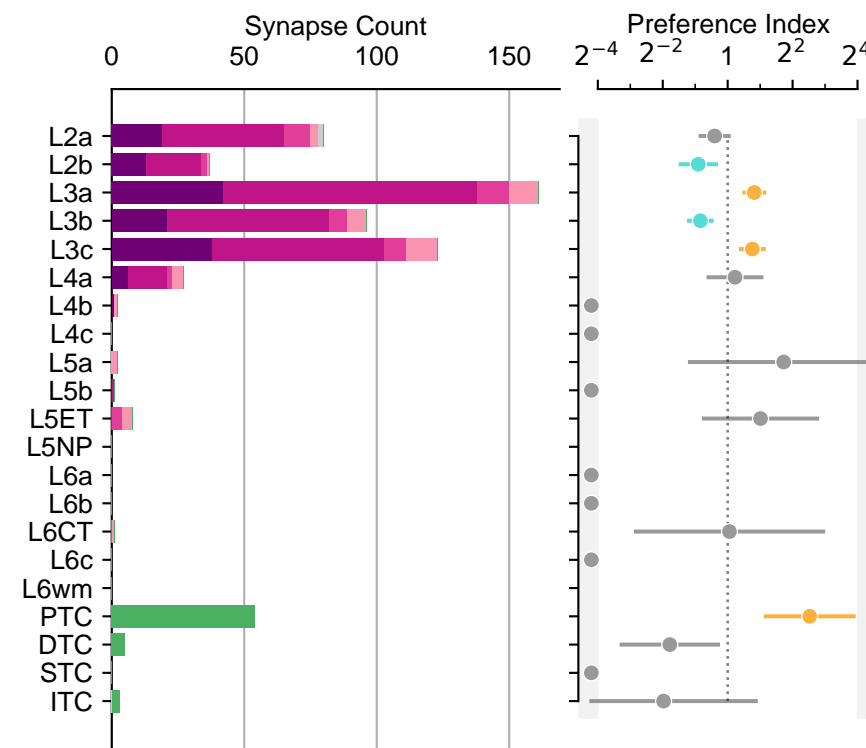

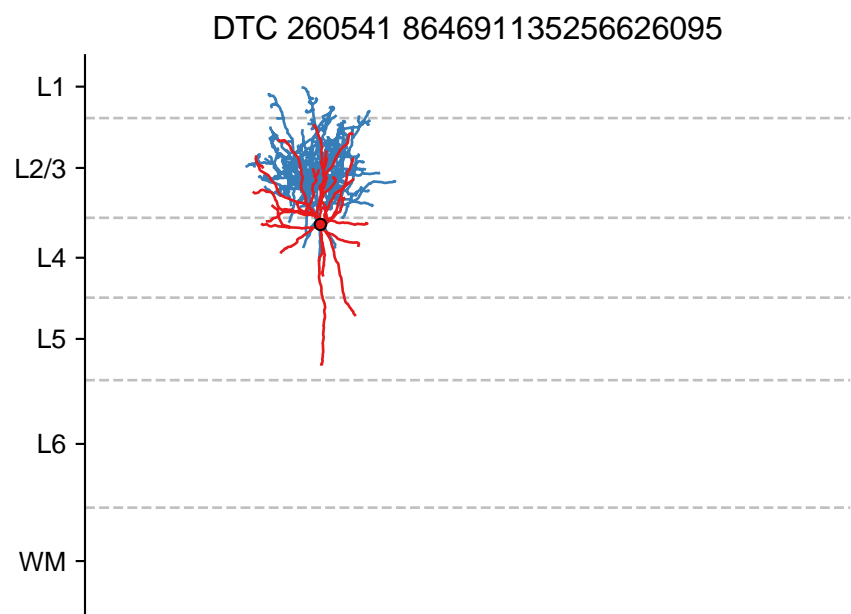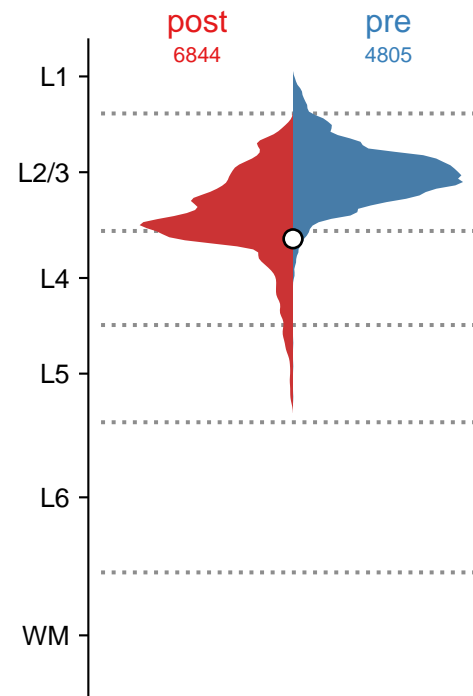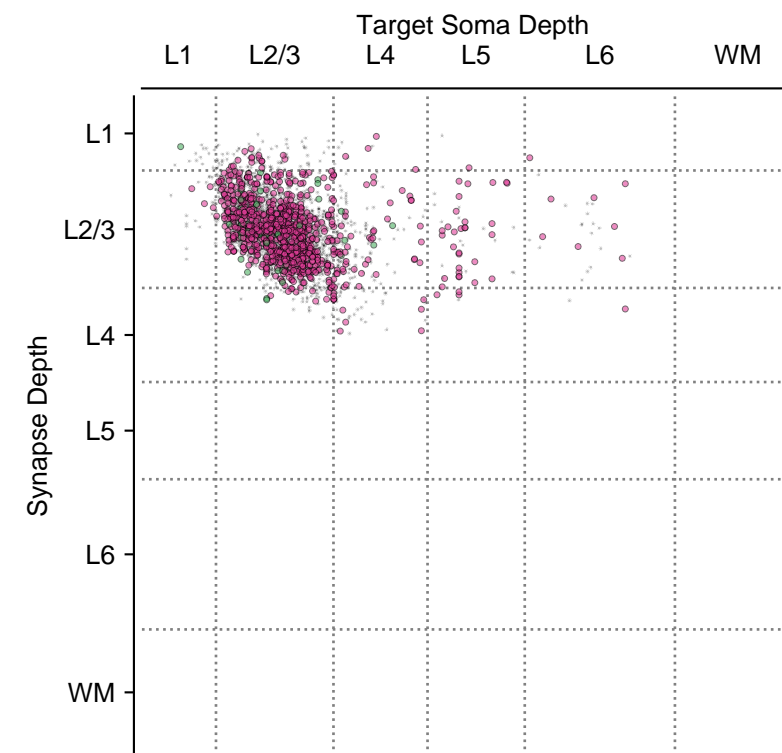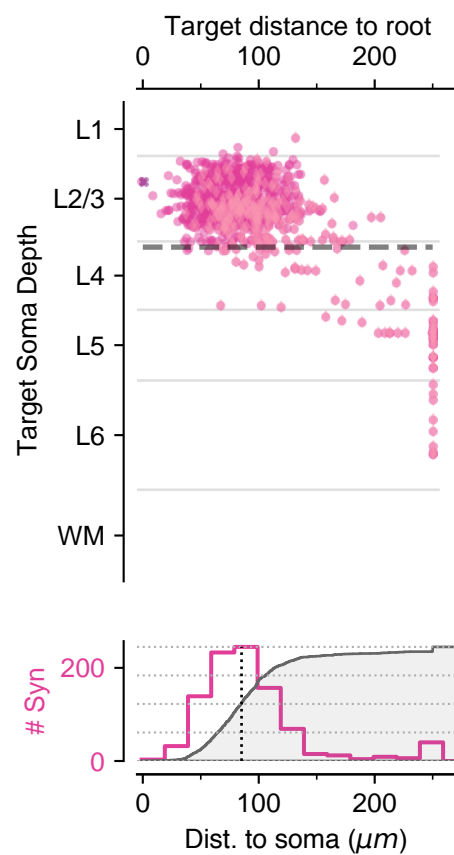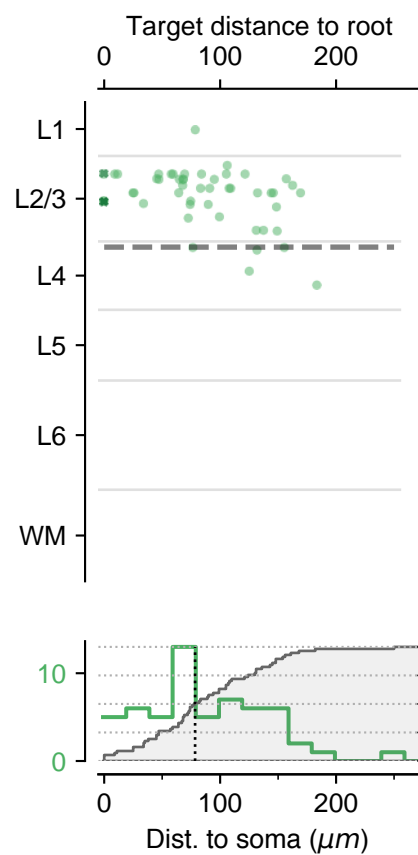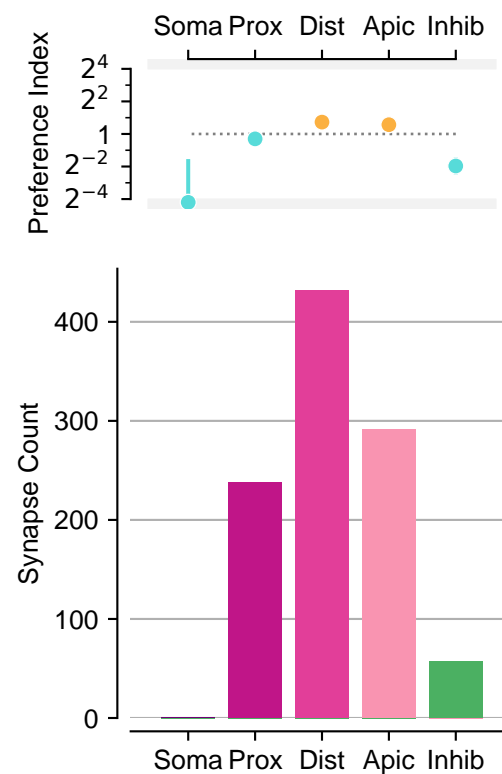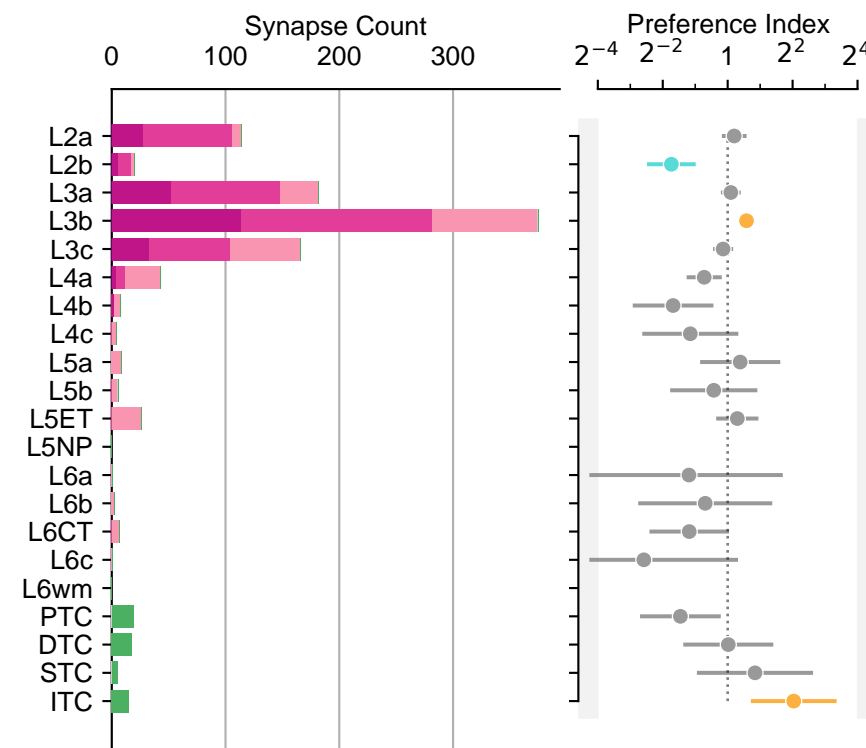

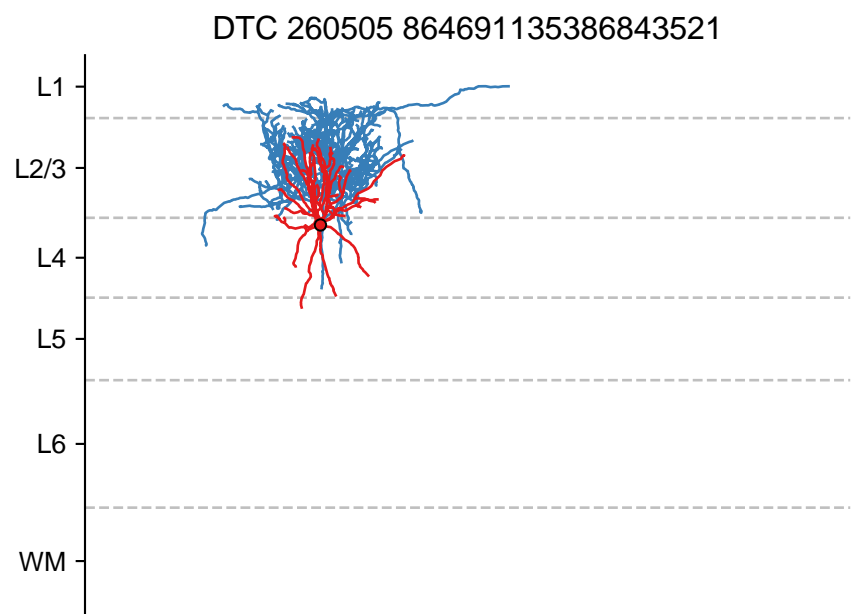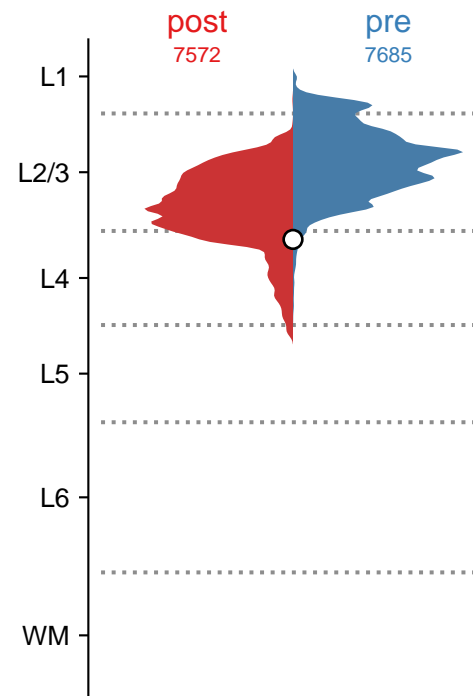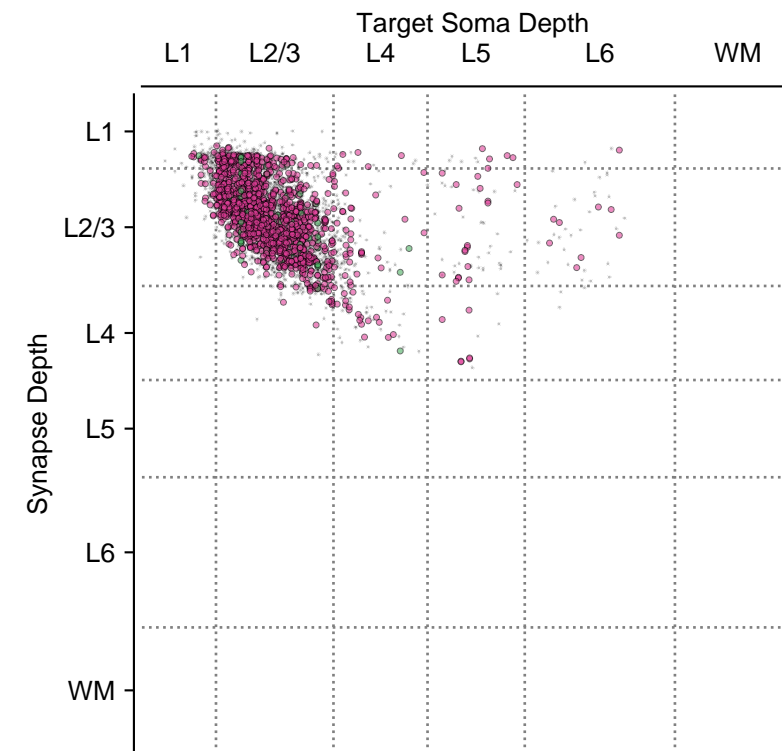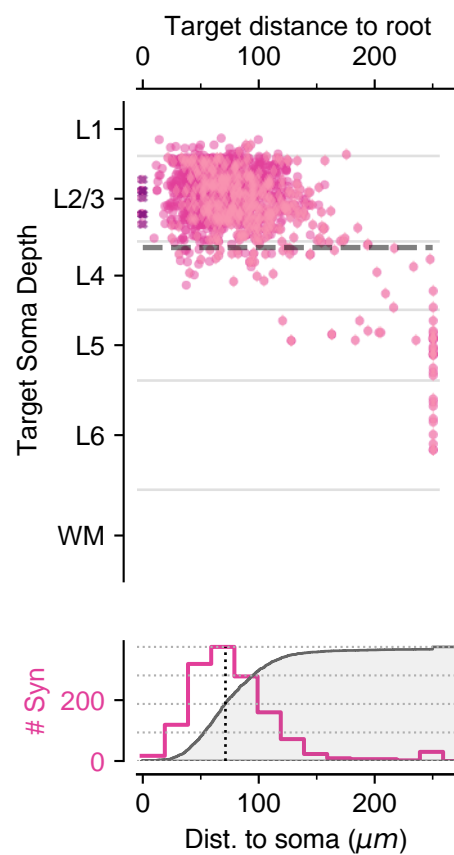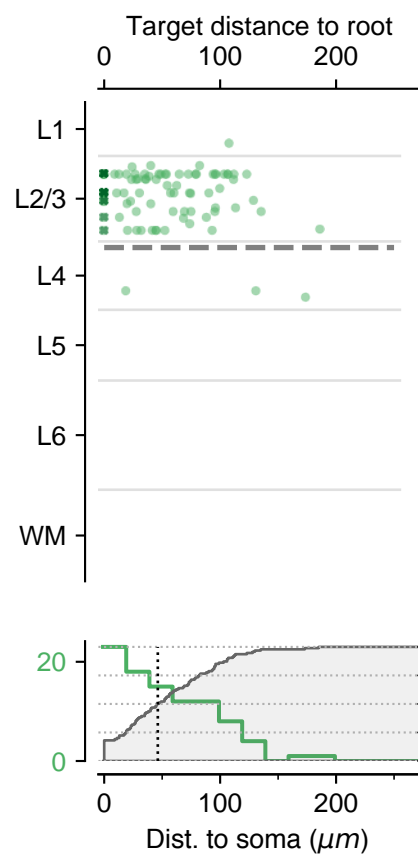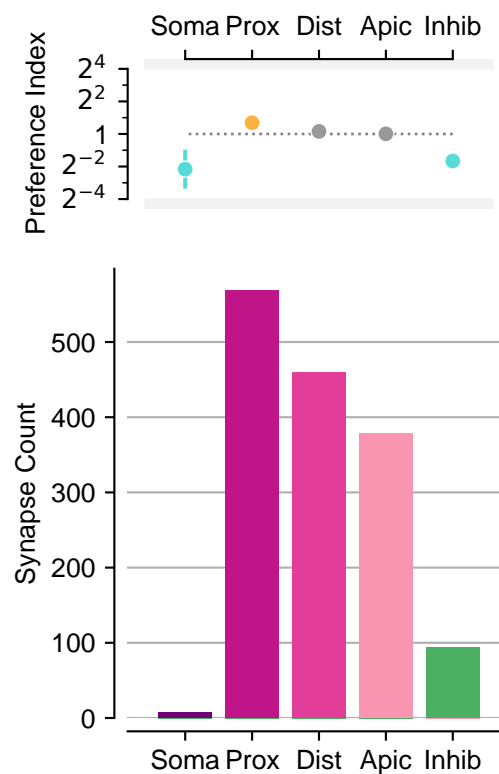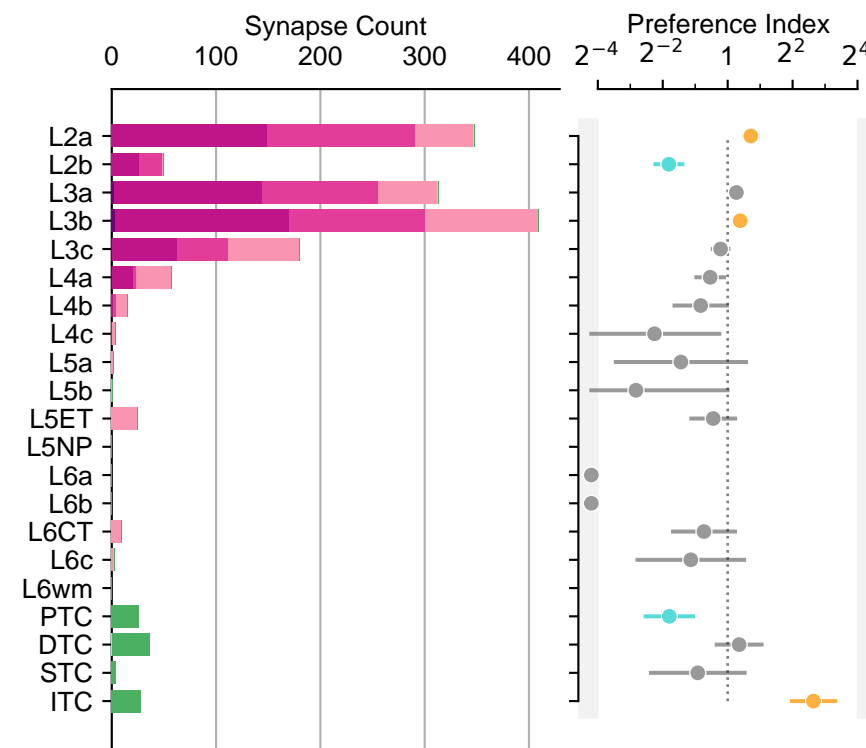

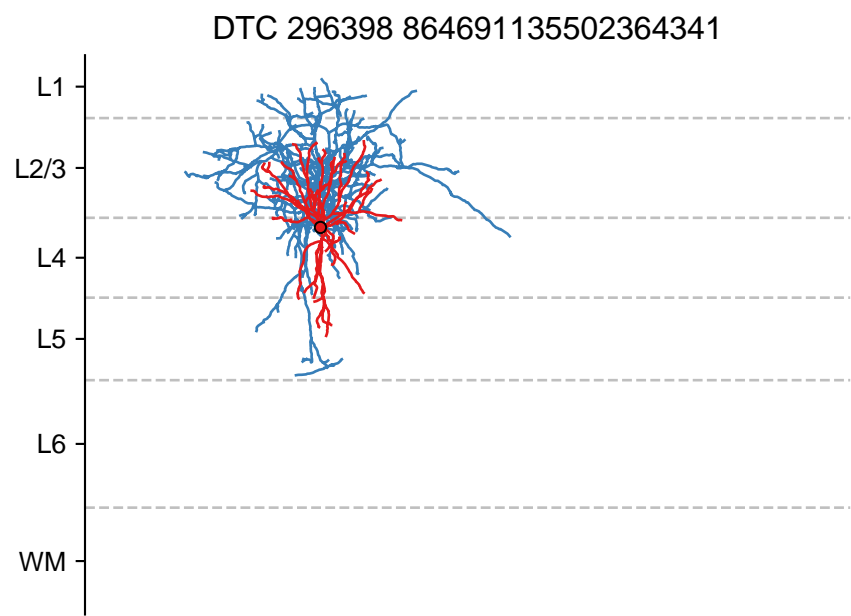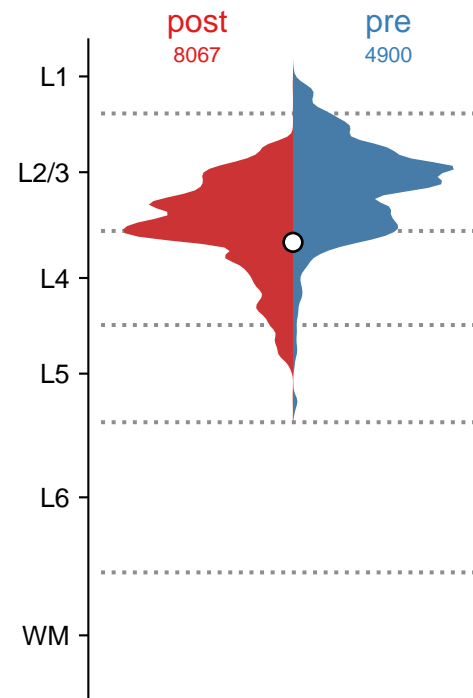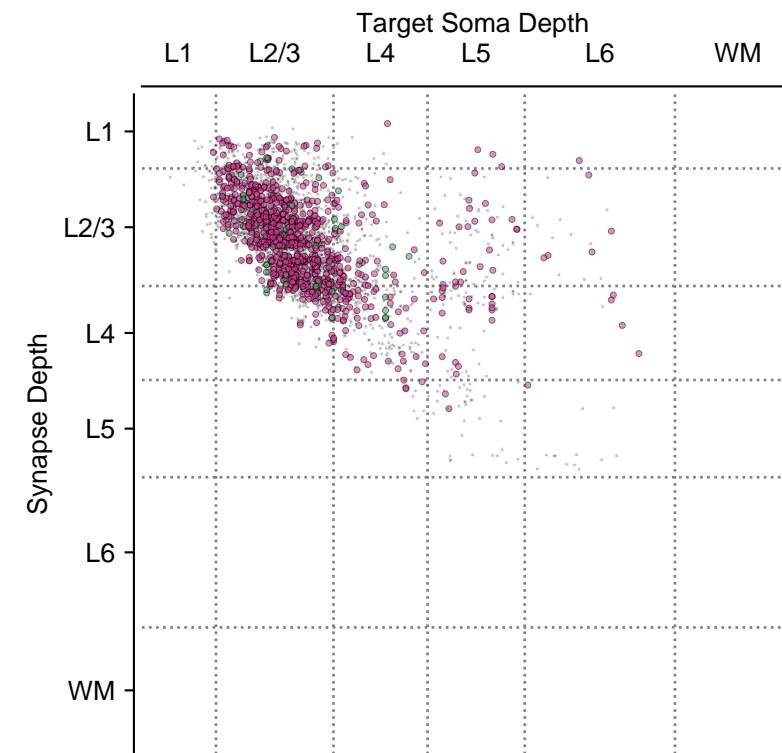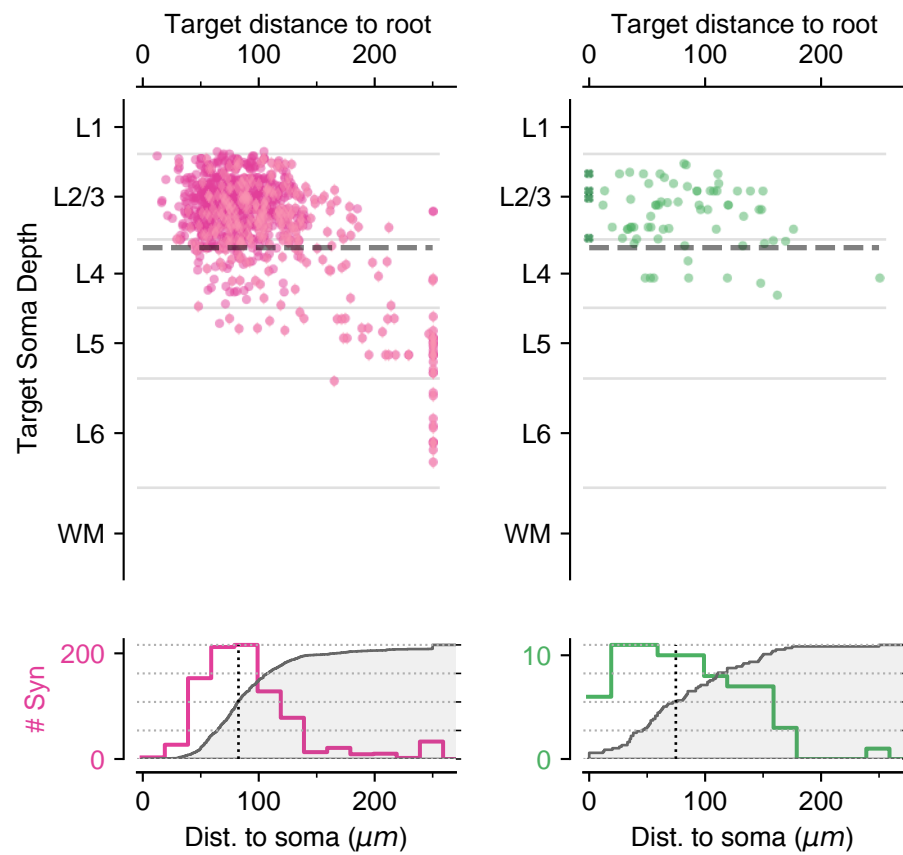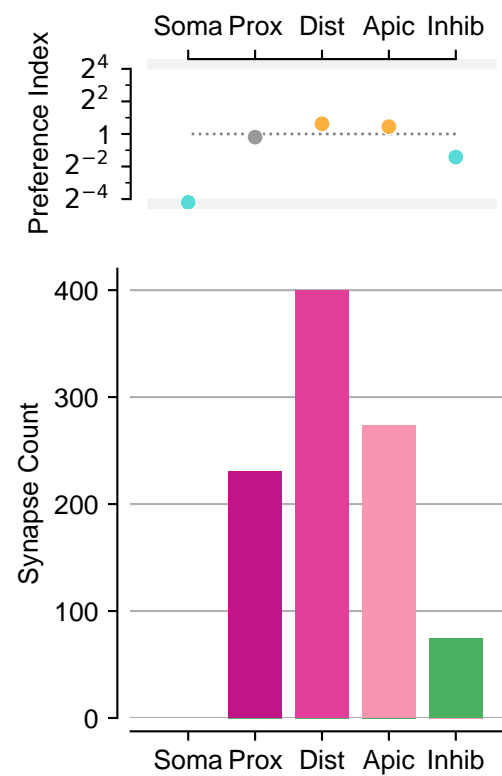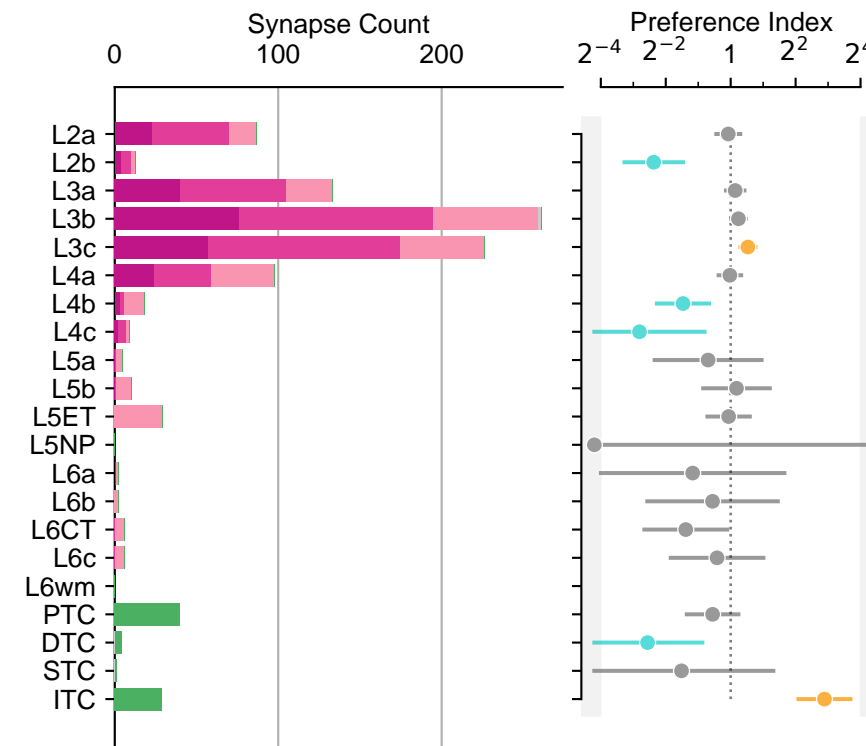



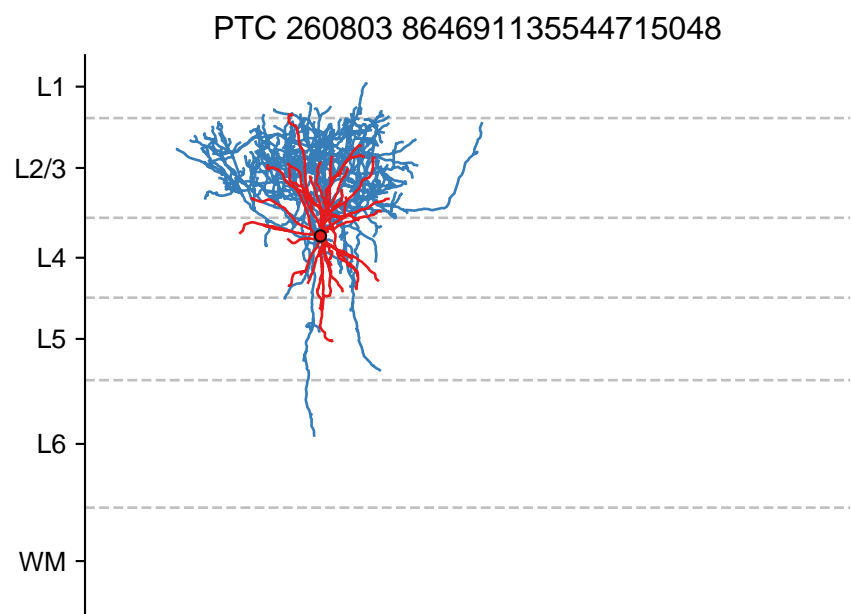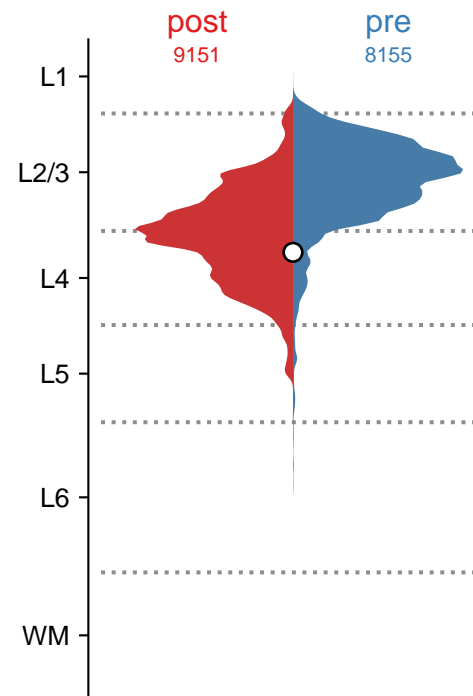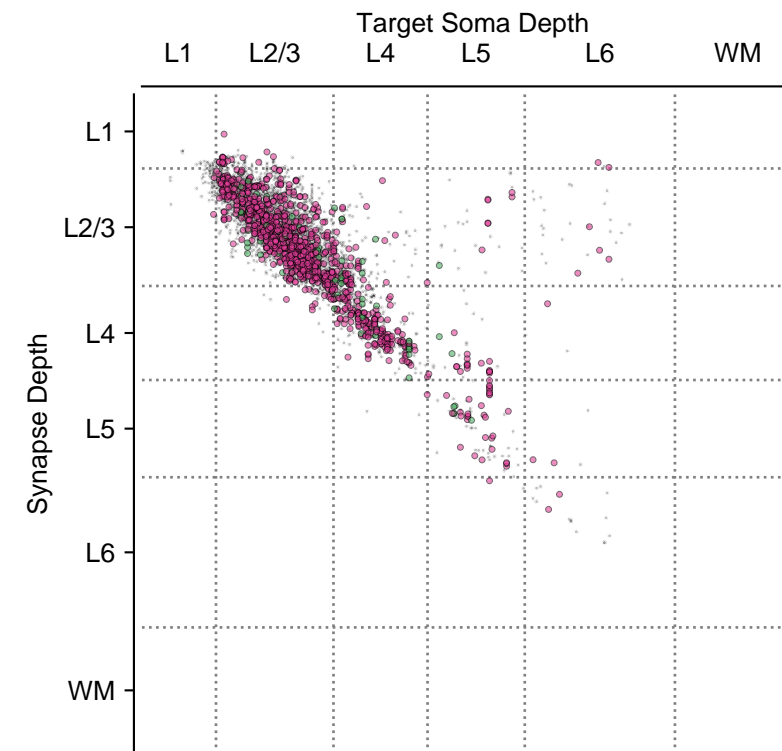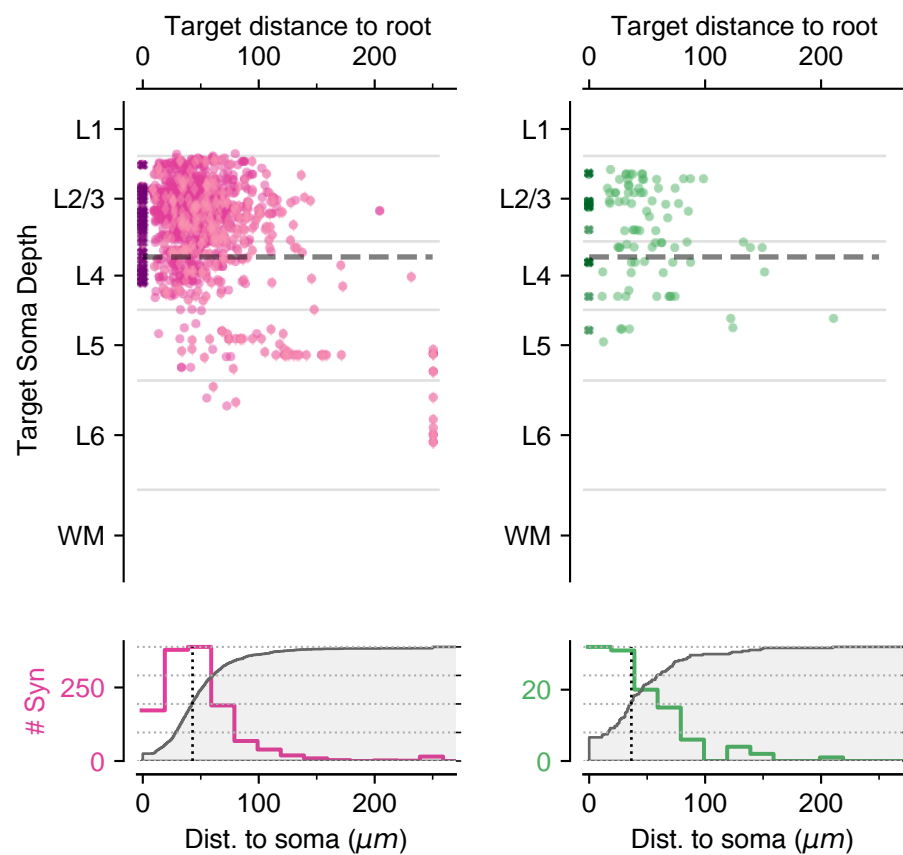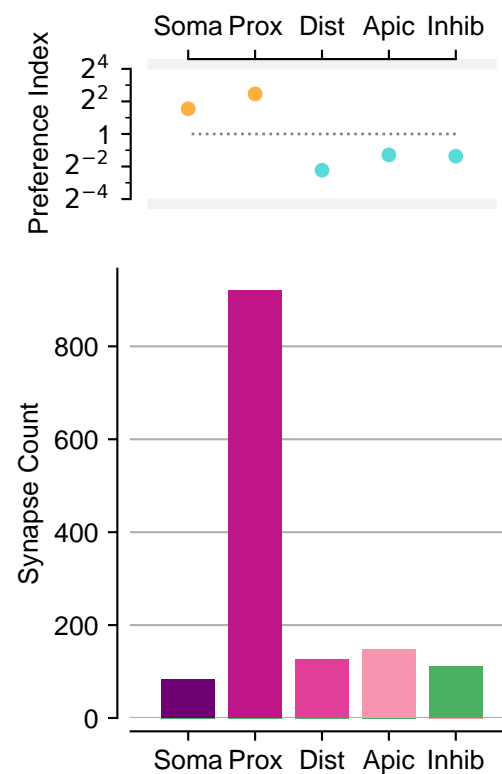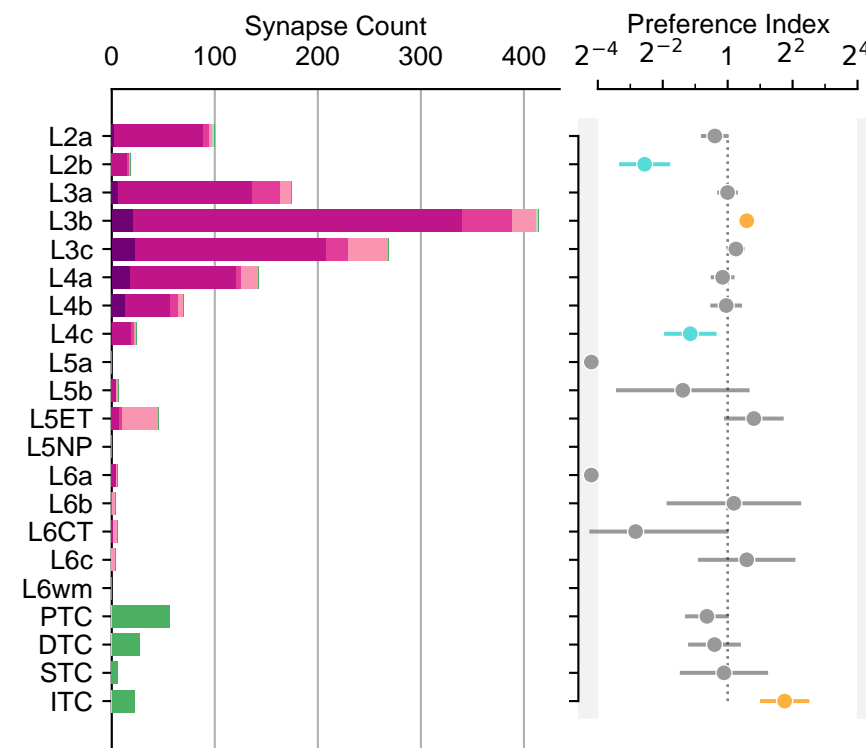

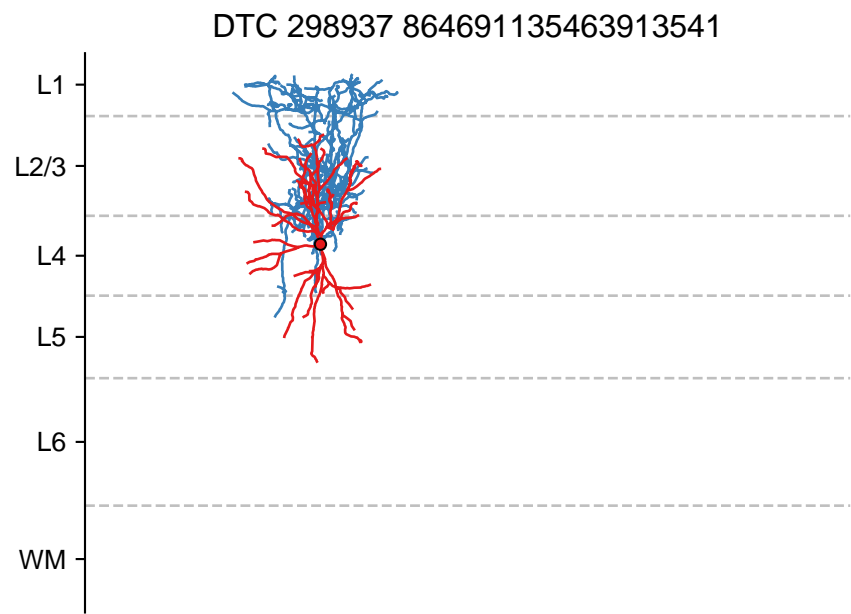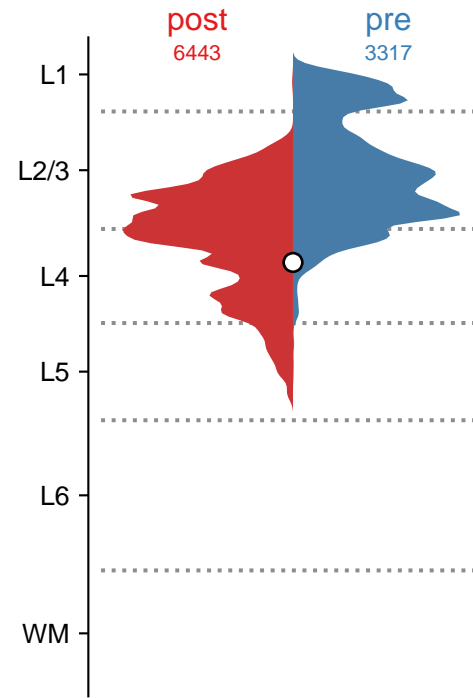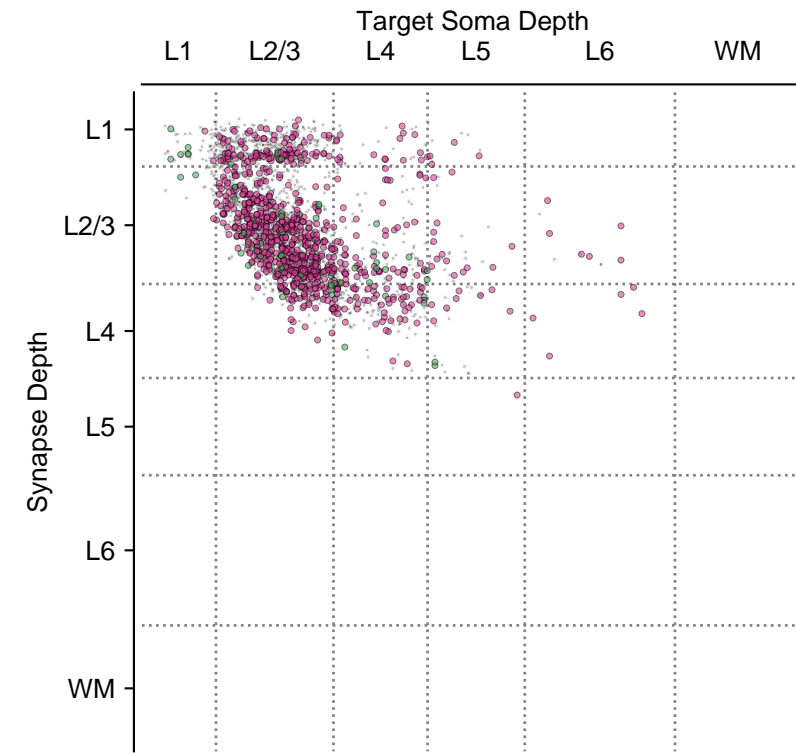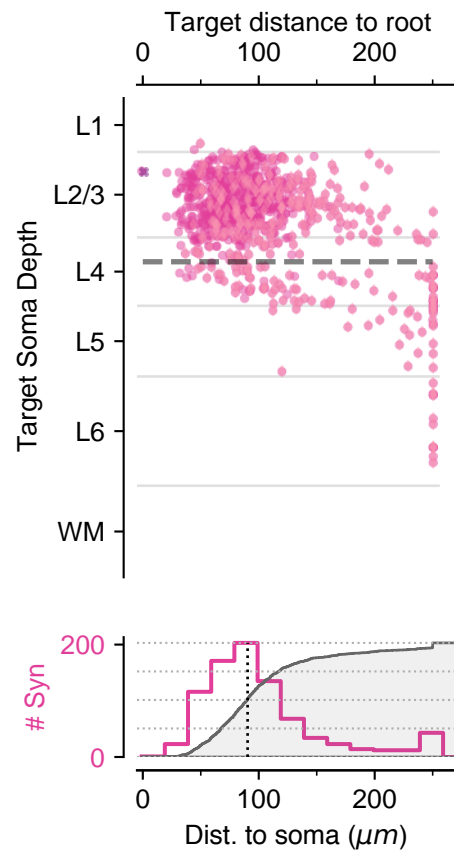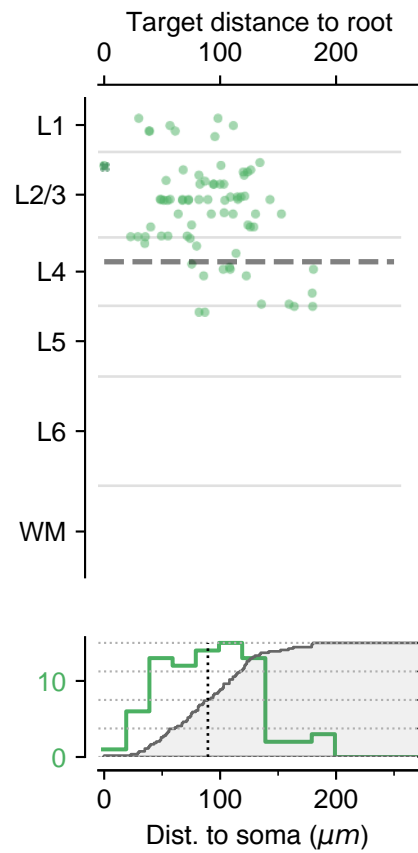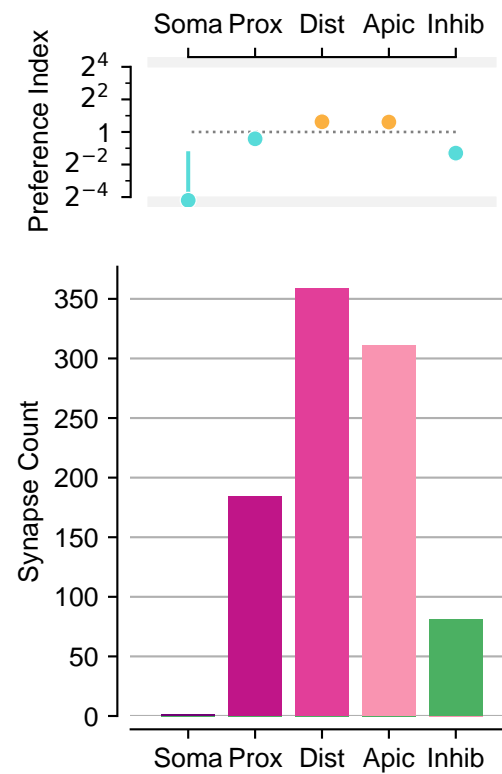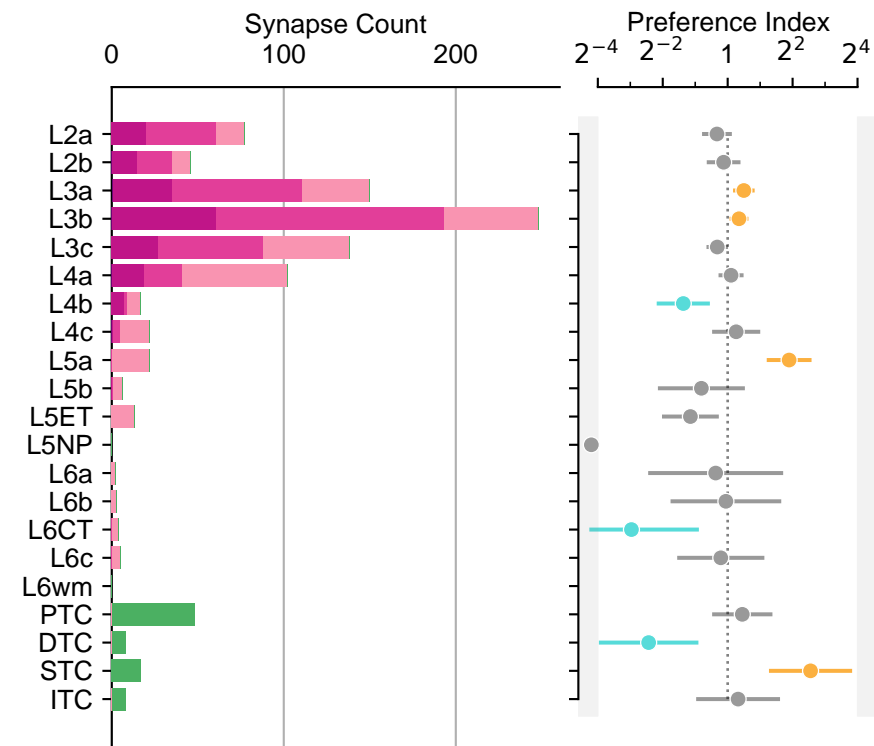

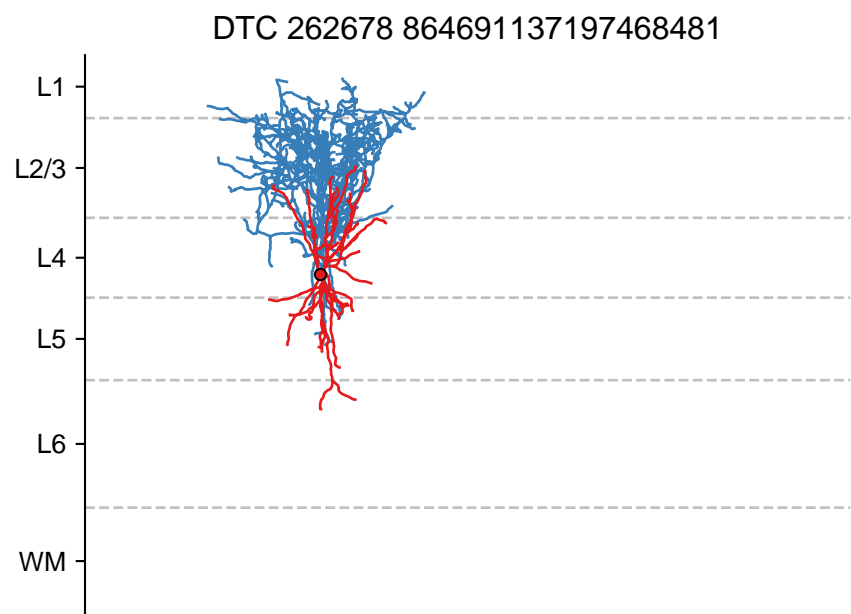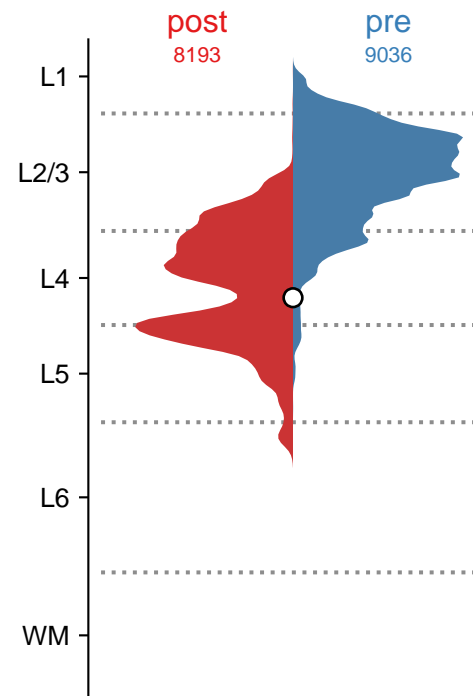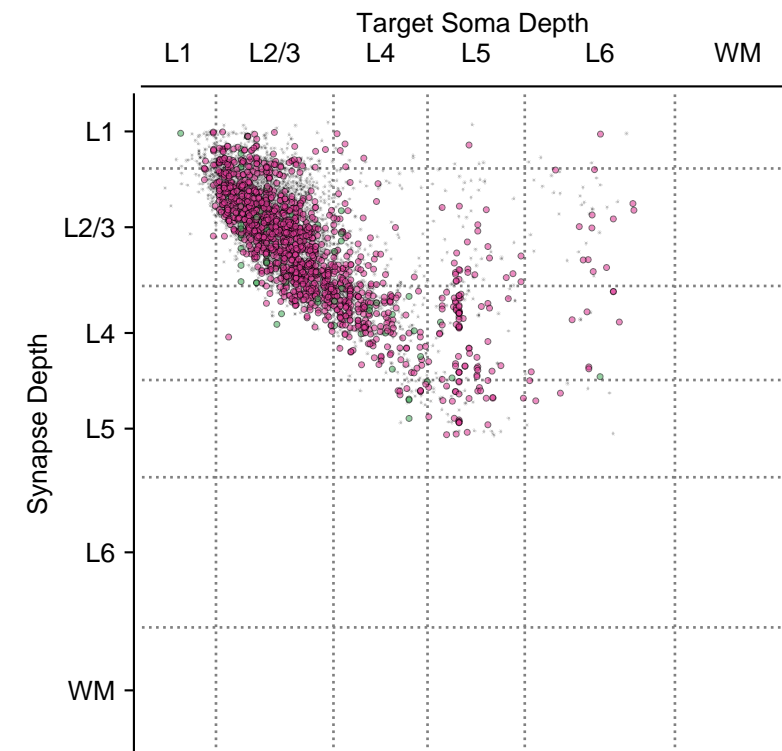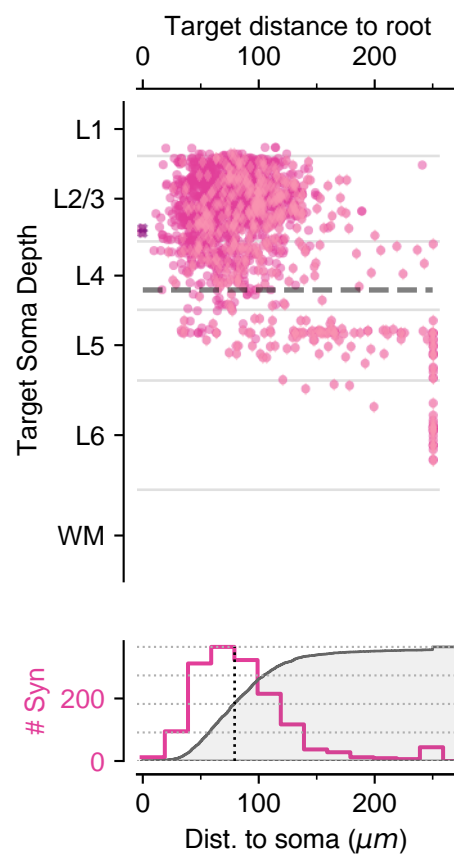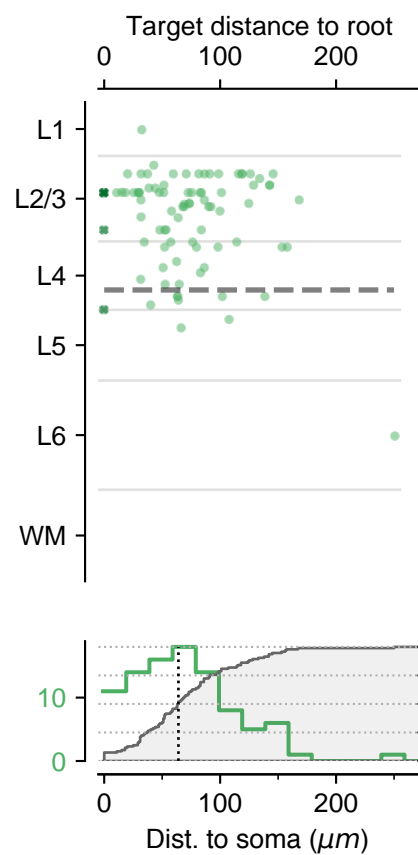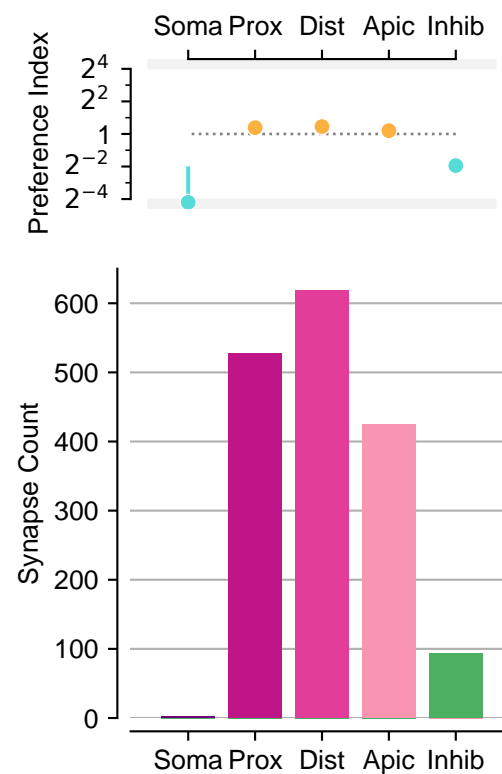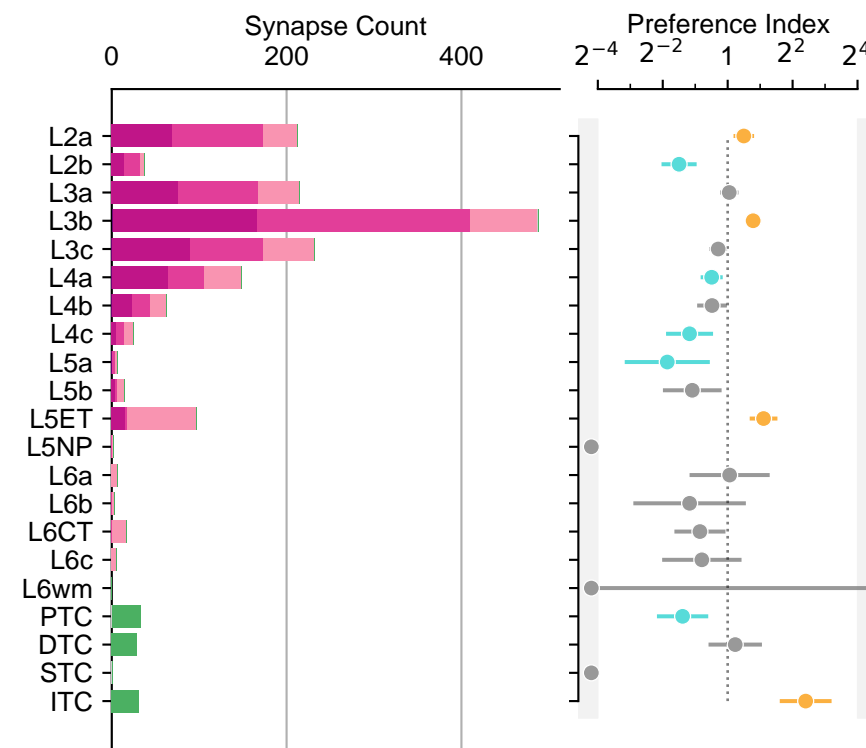

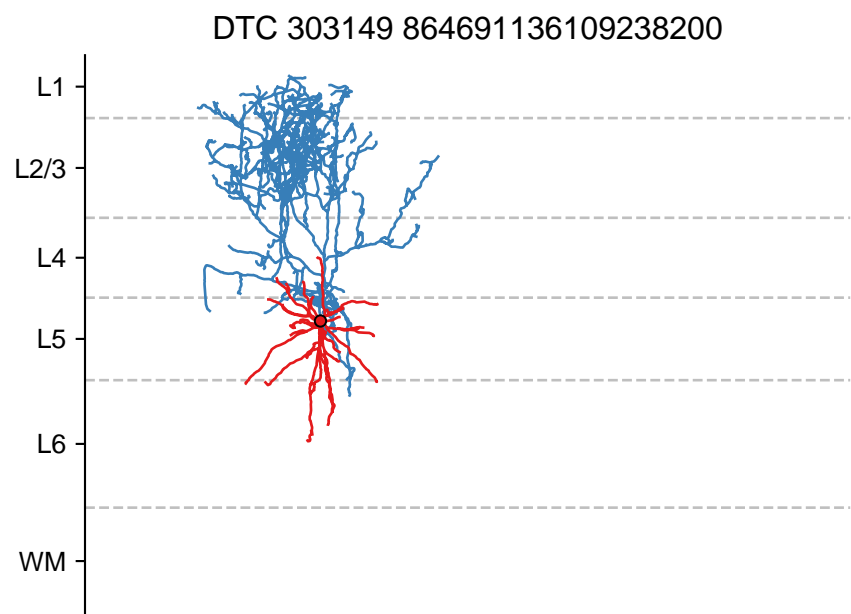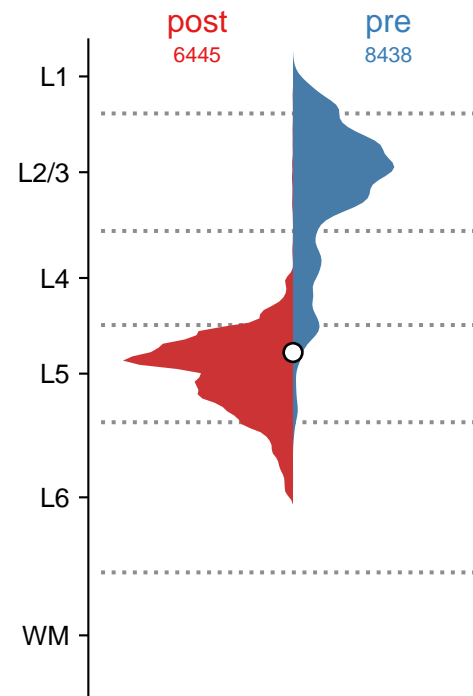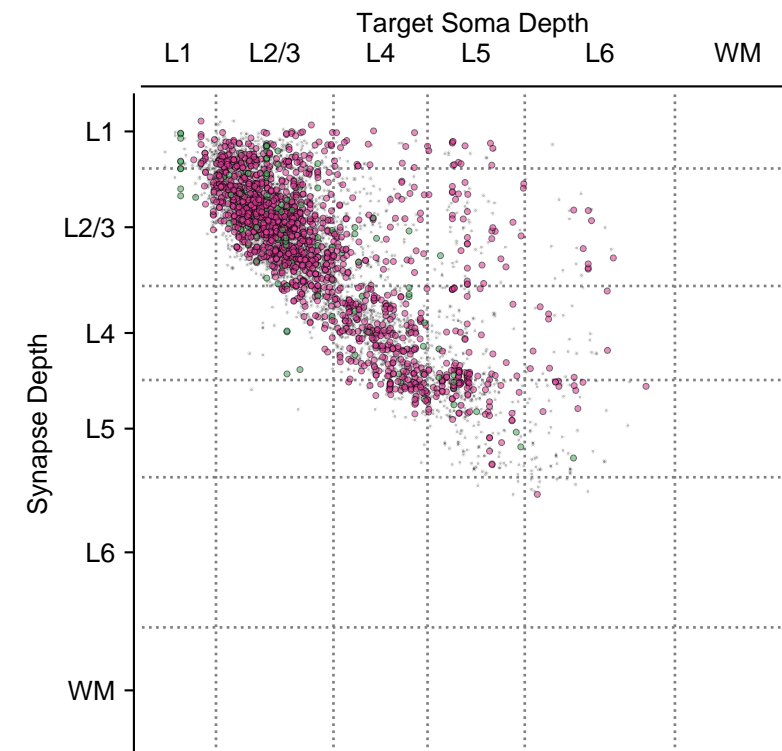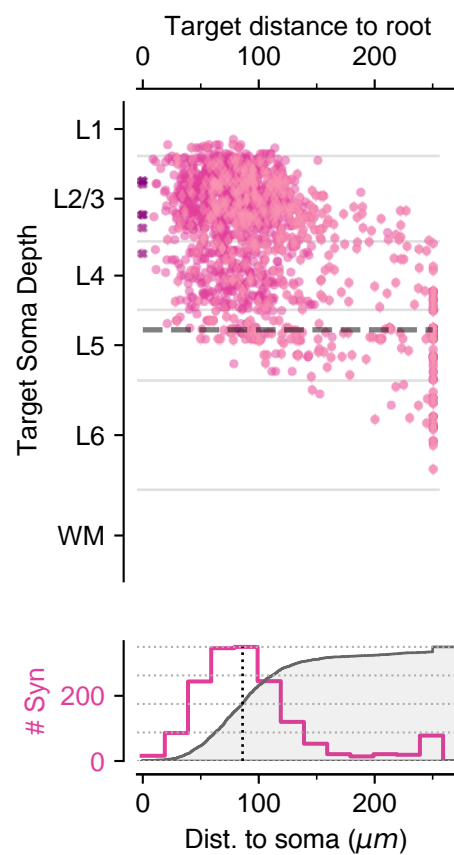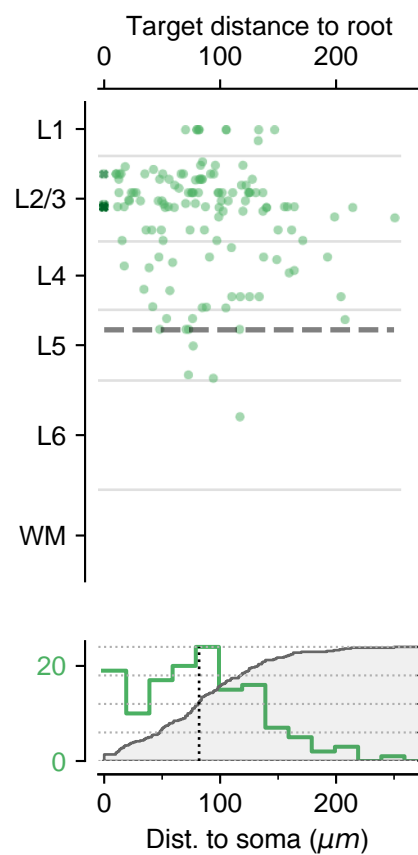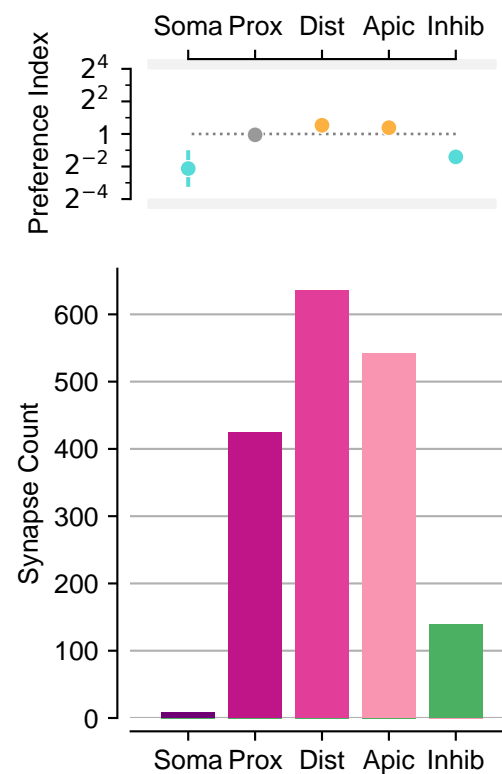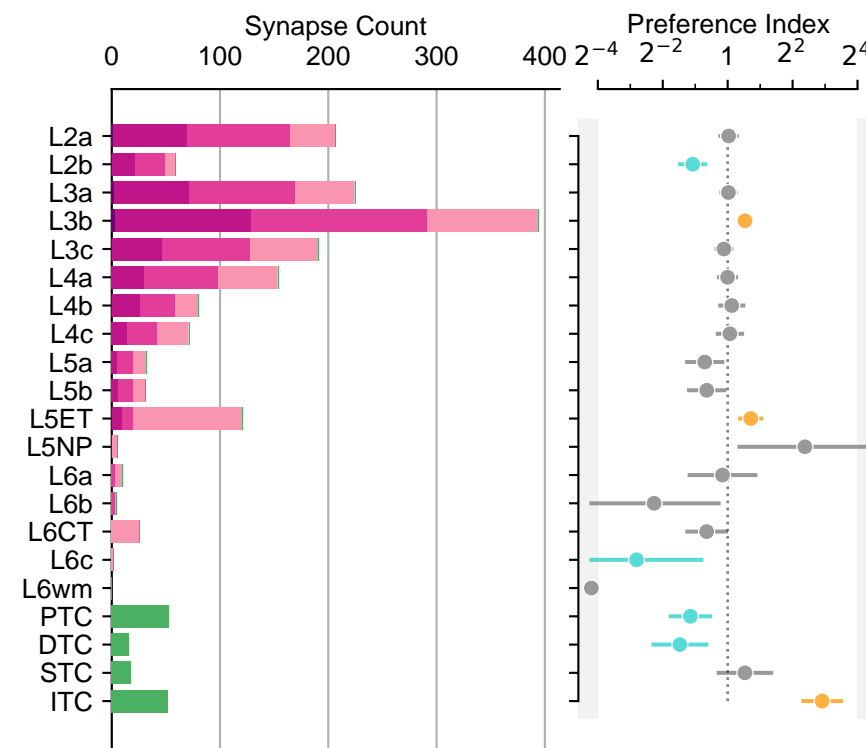

# Group 3

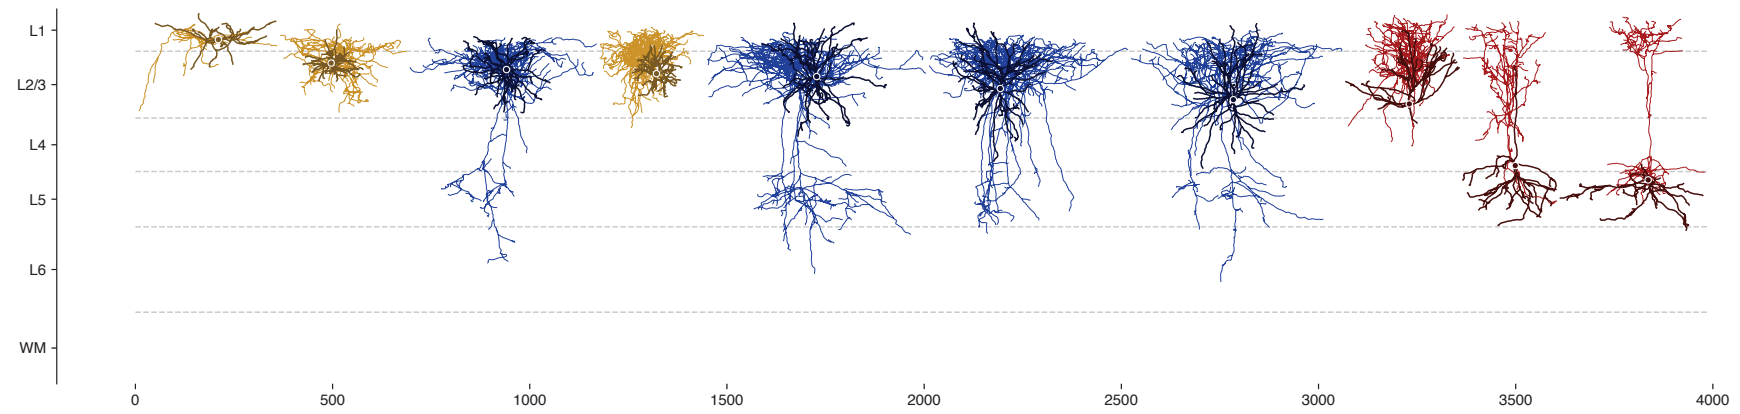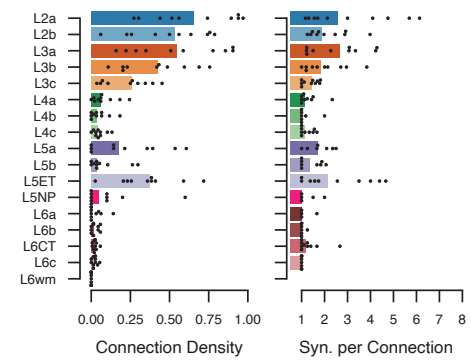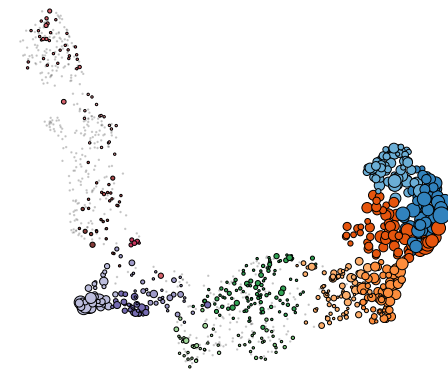

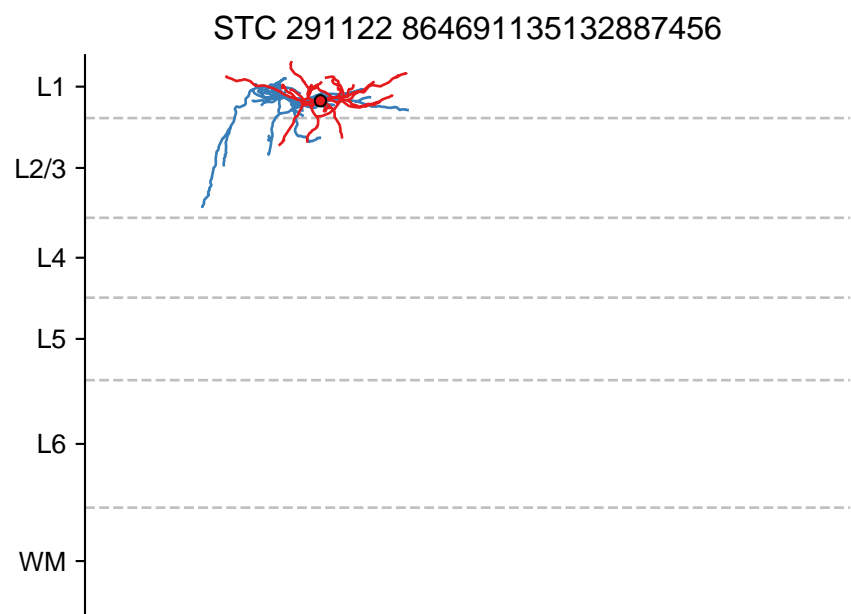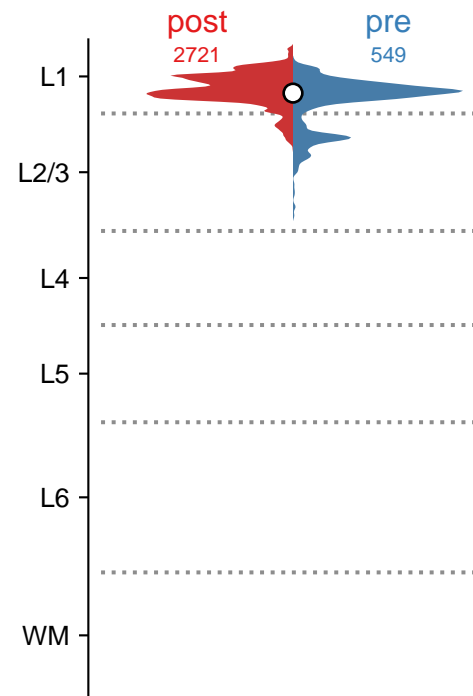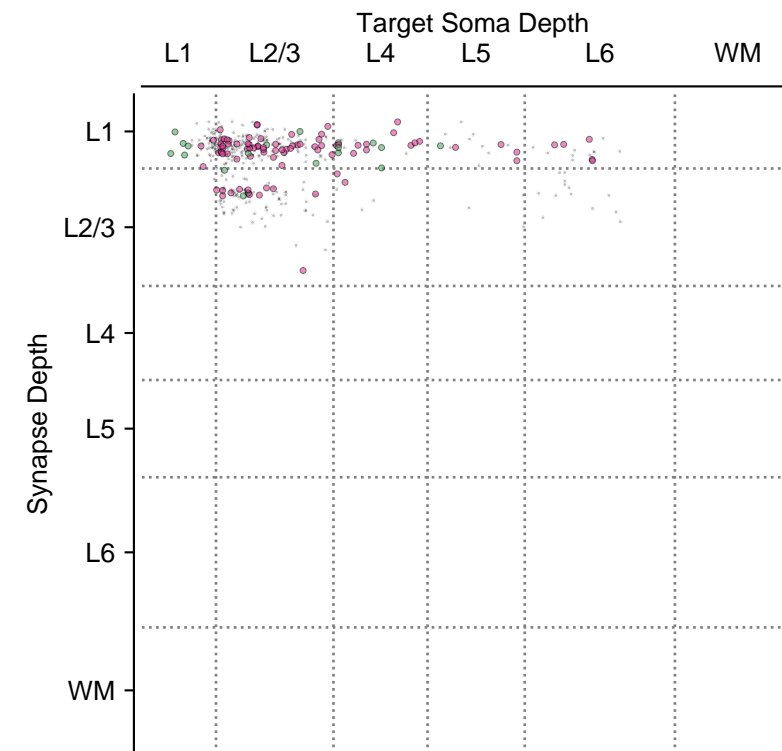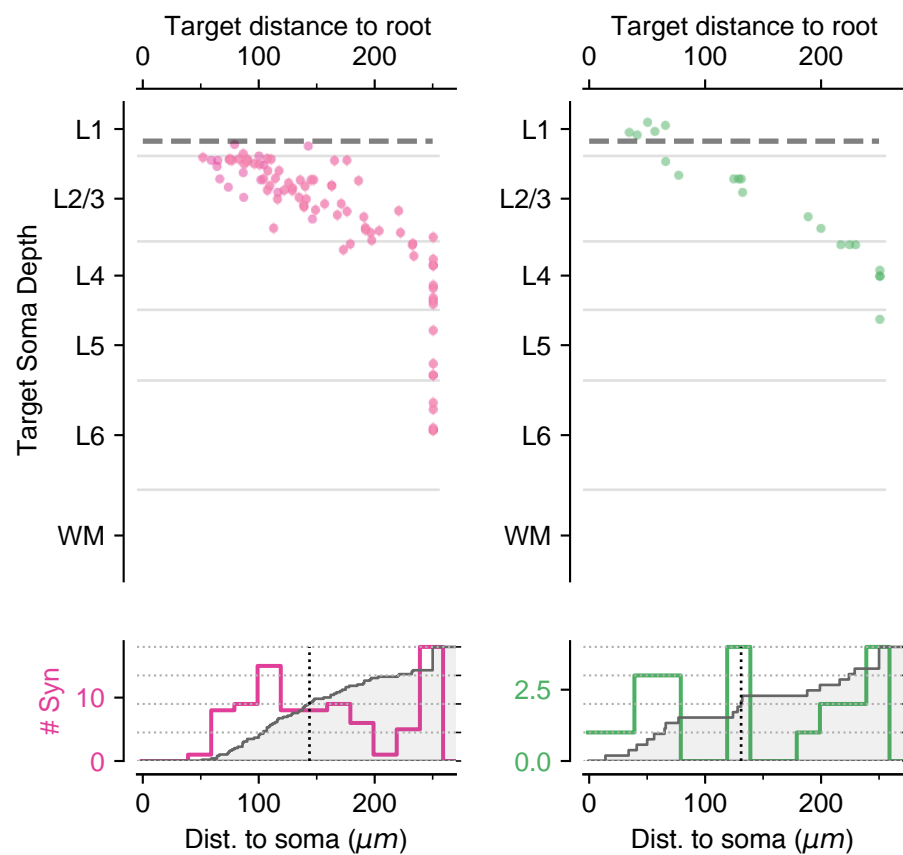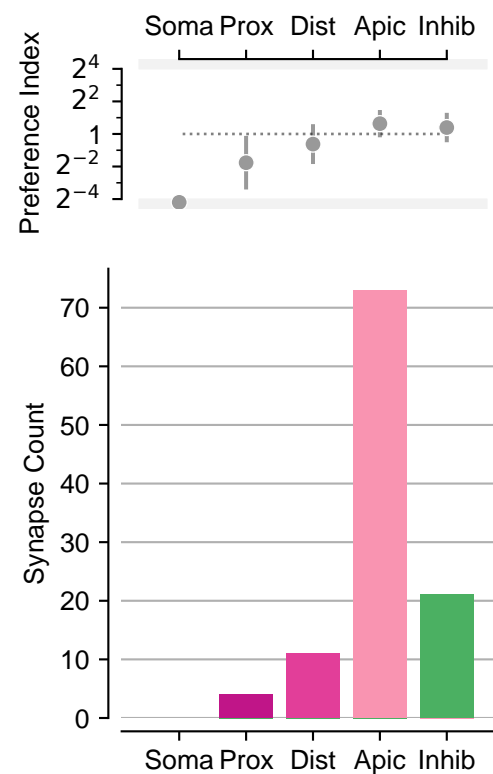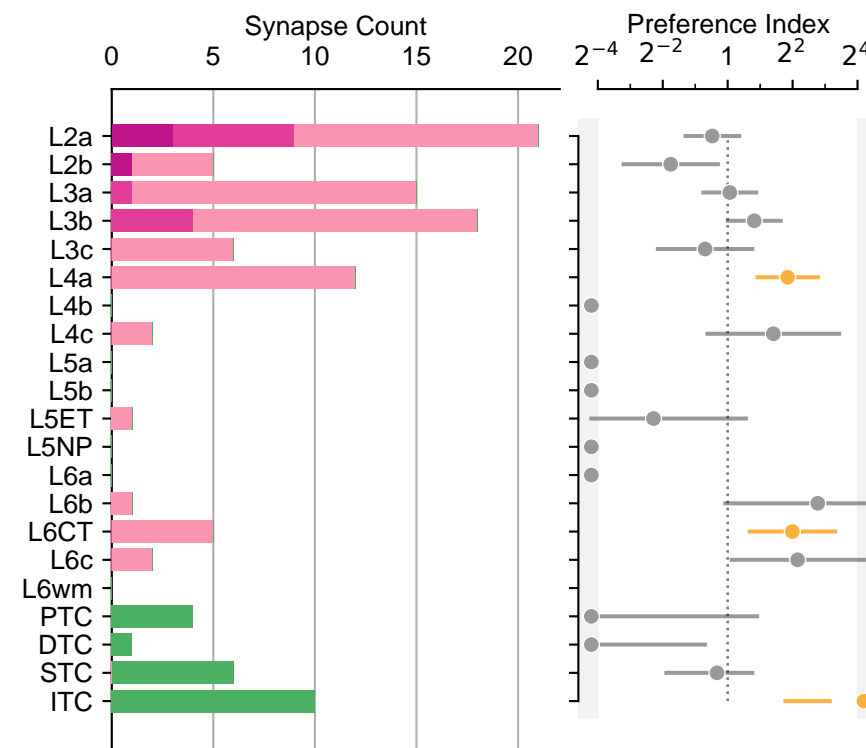

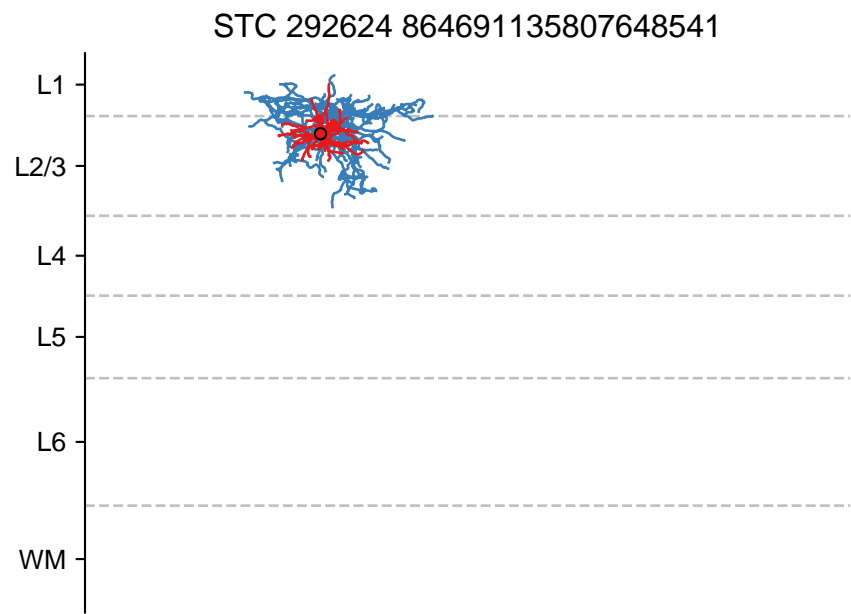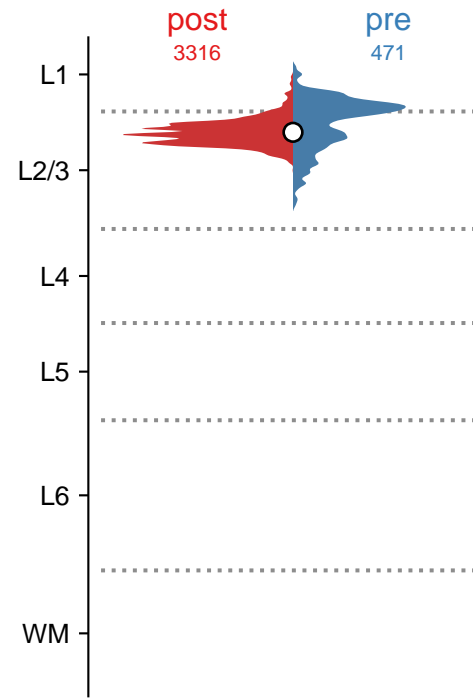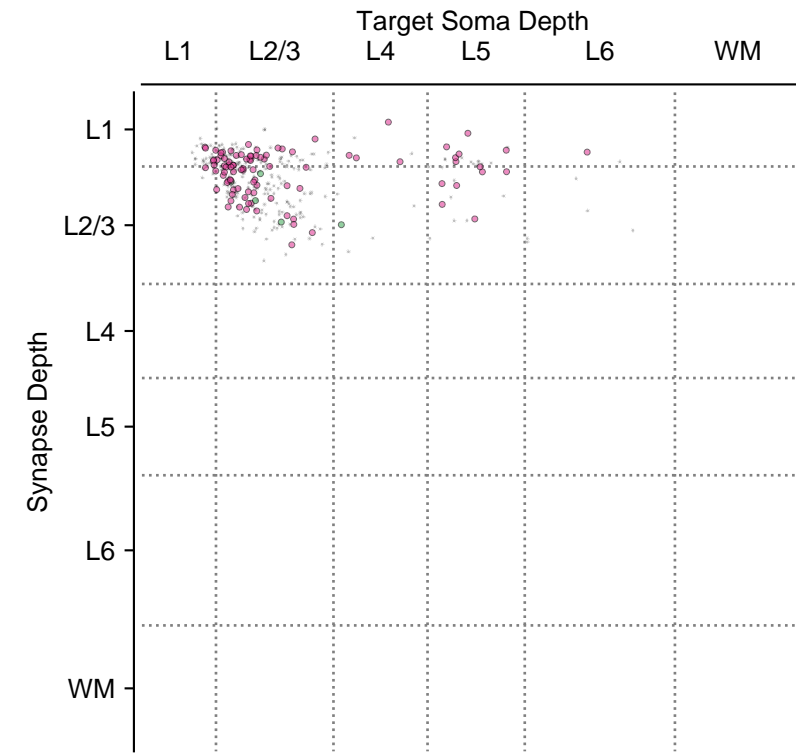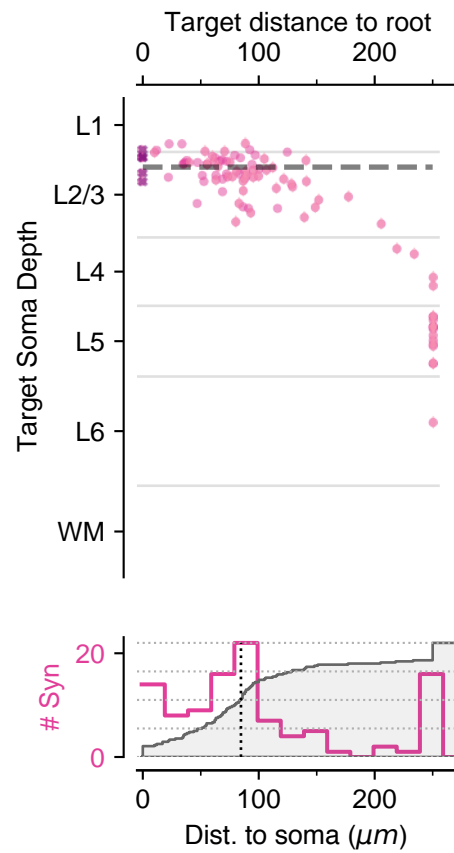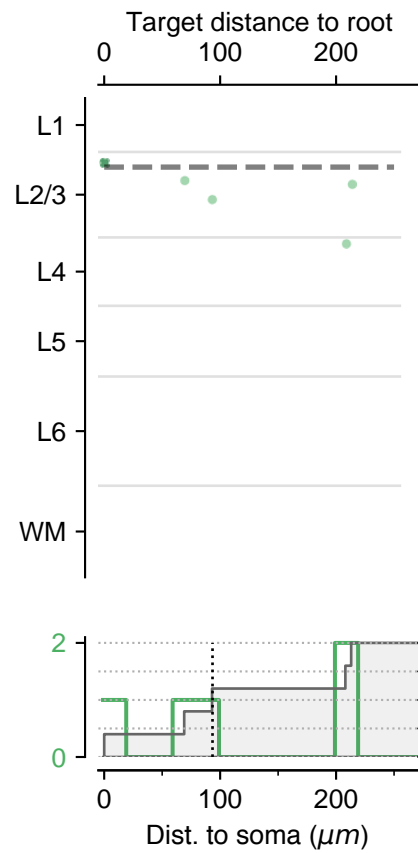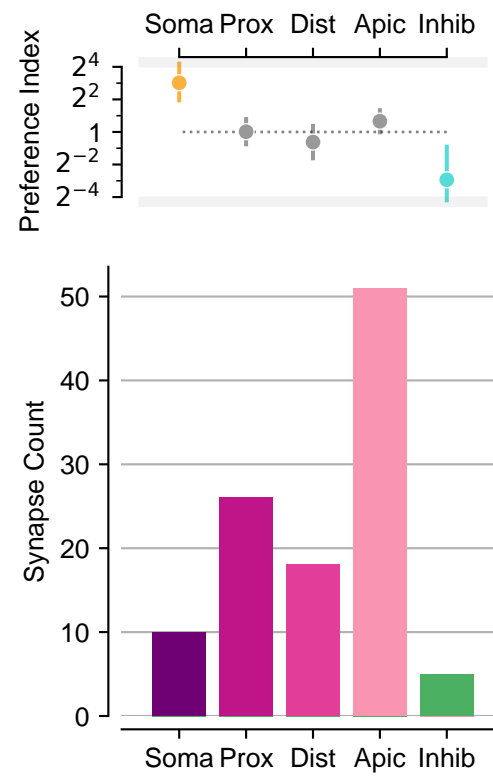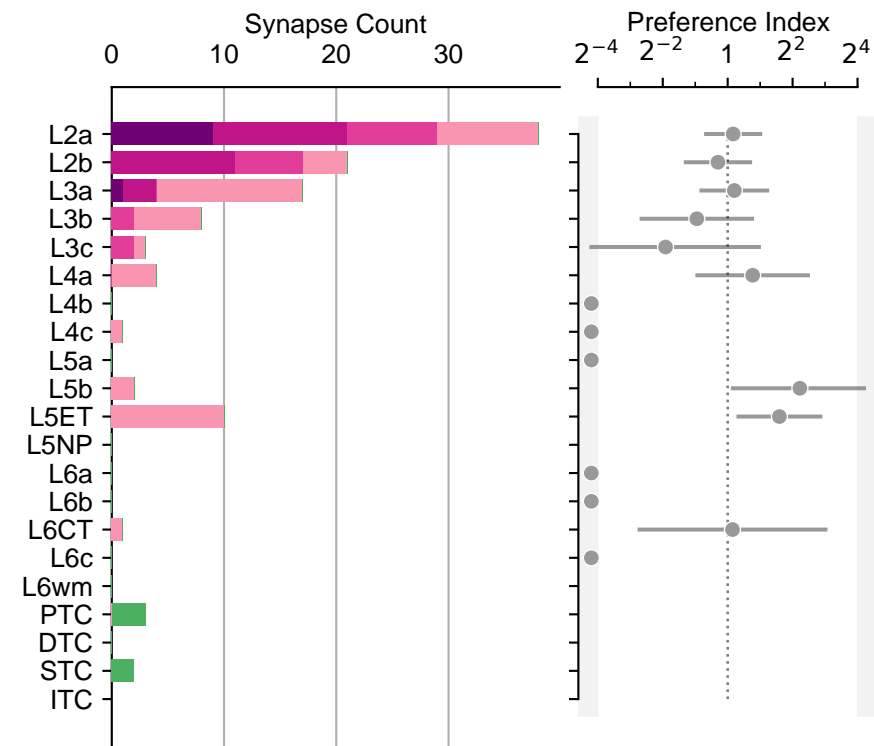

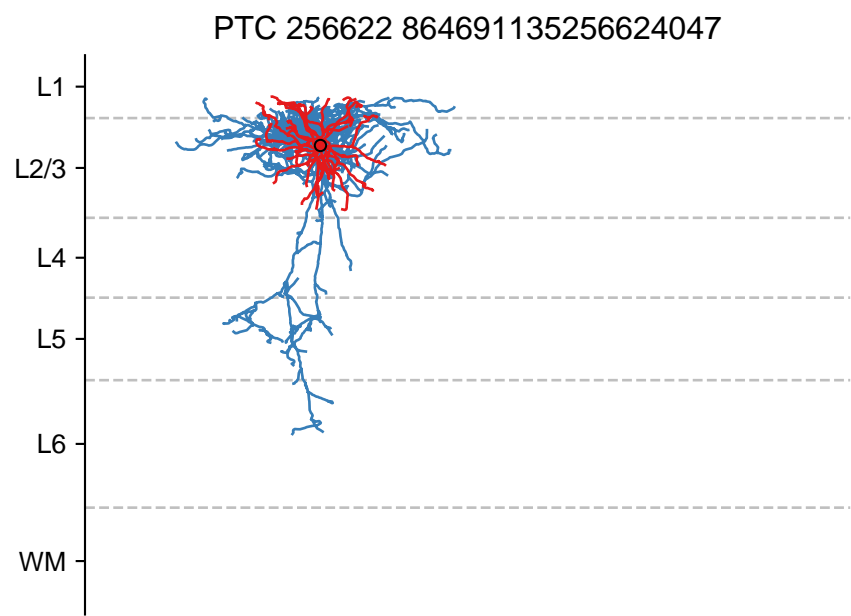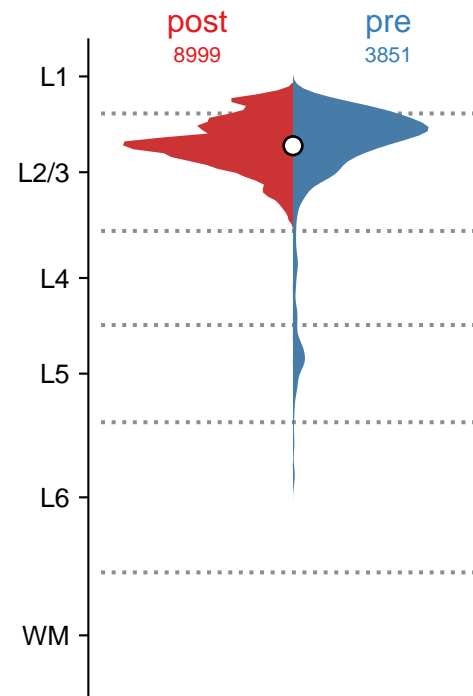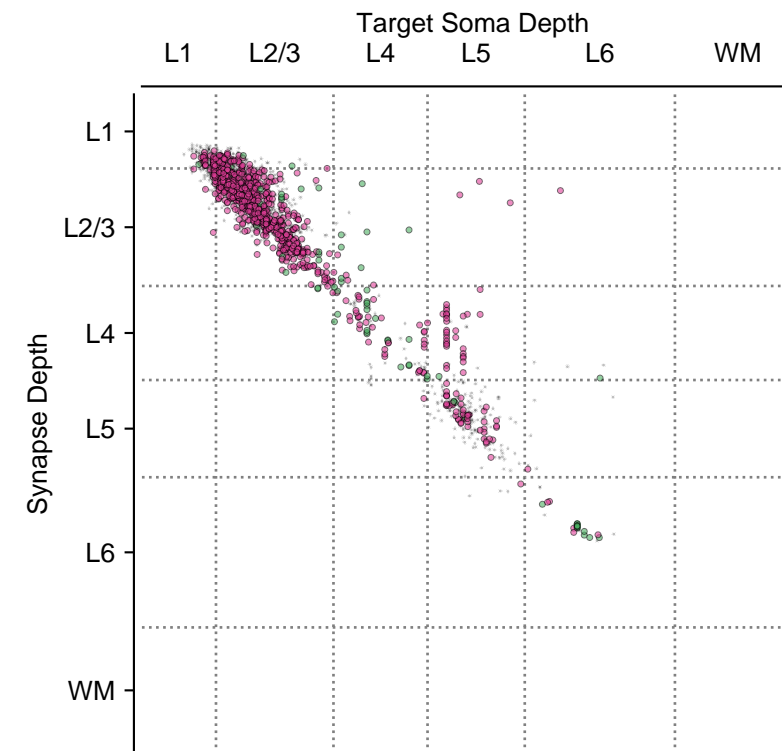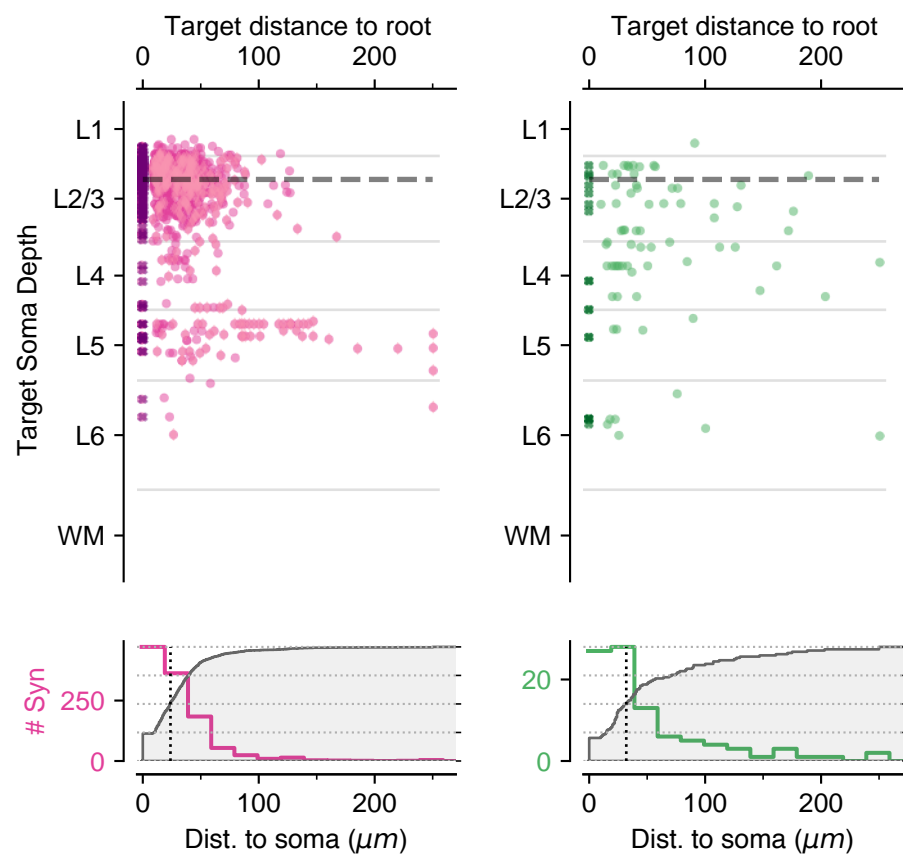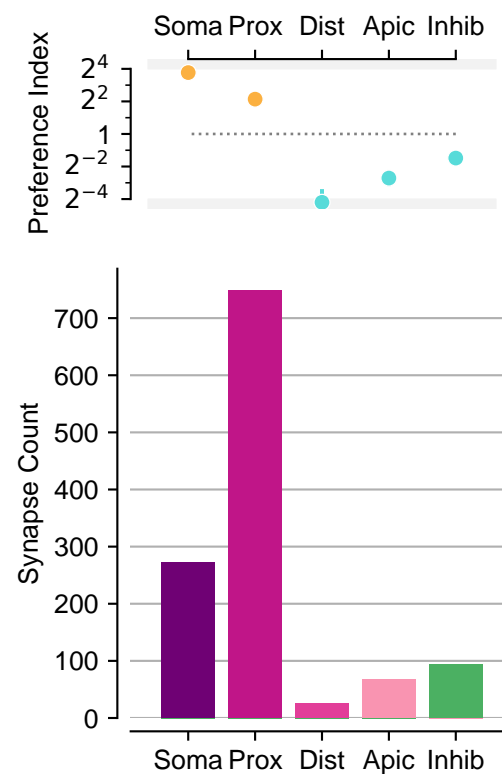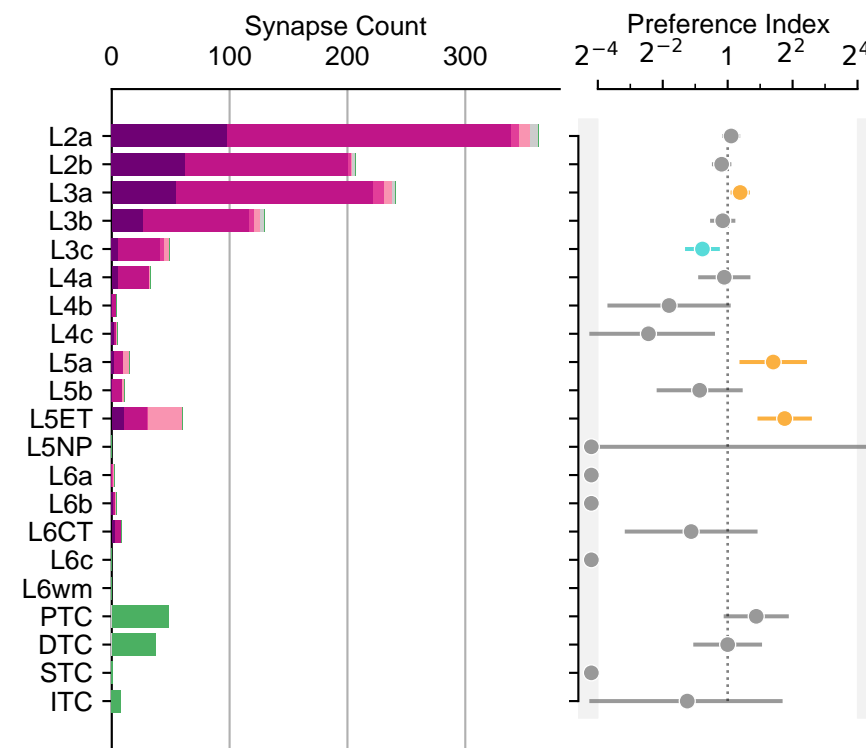



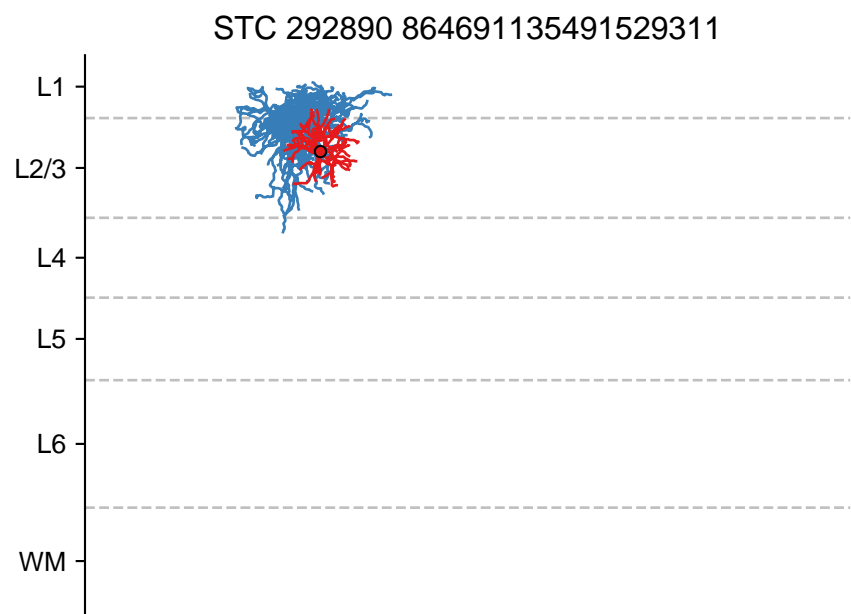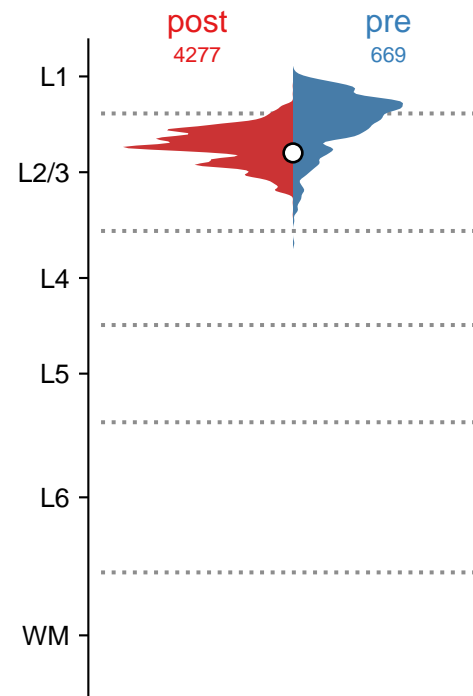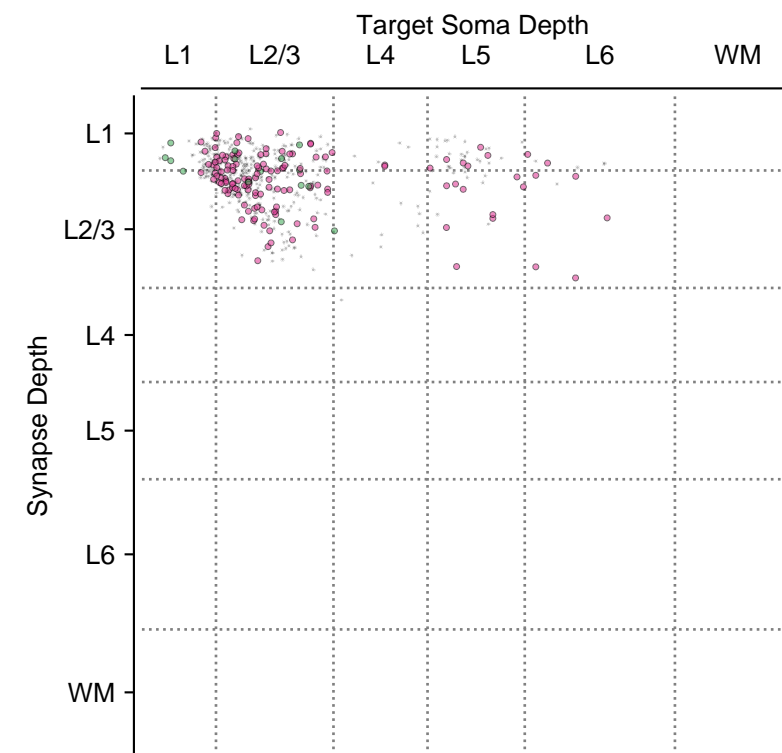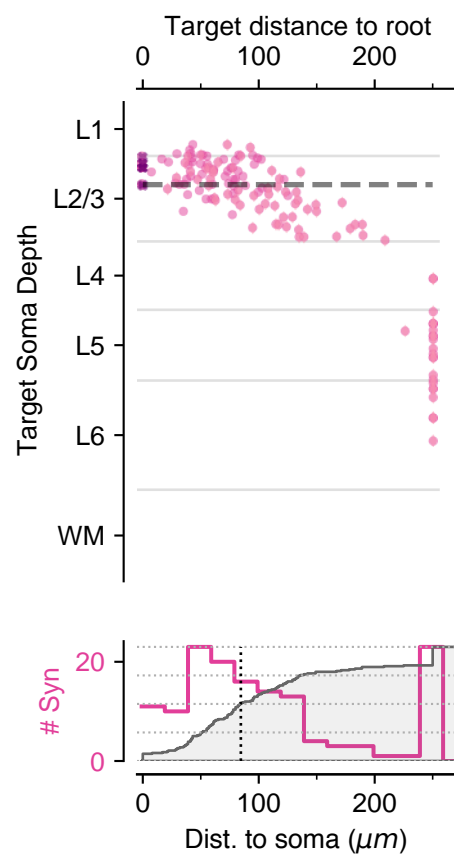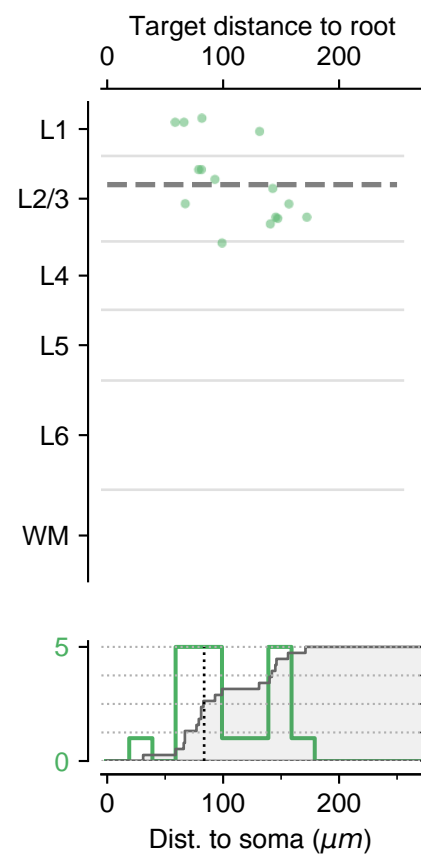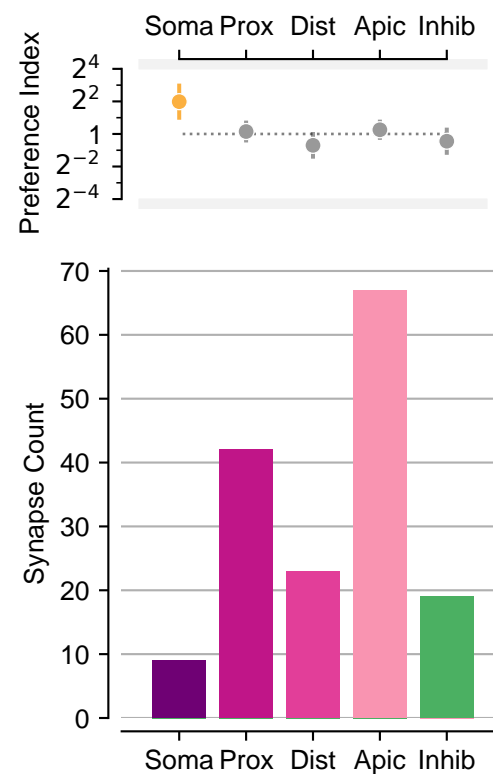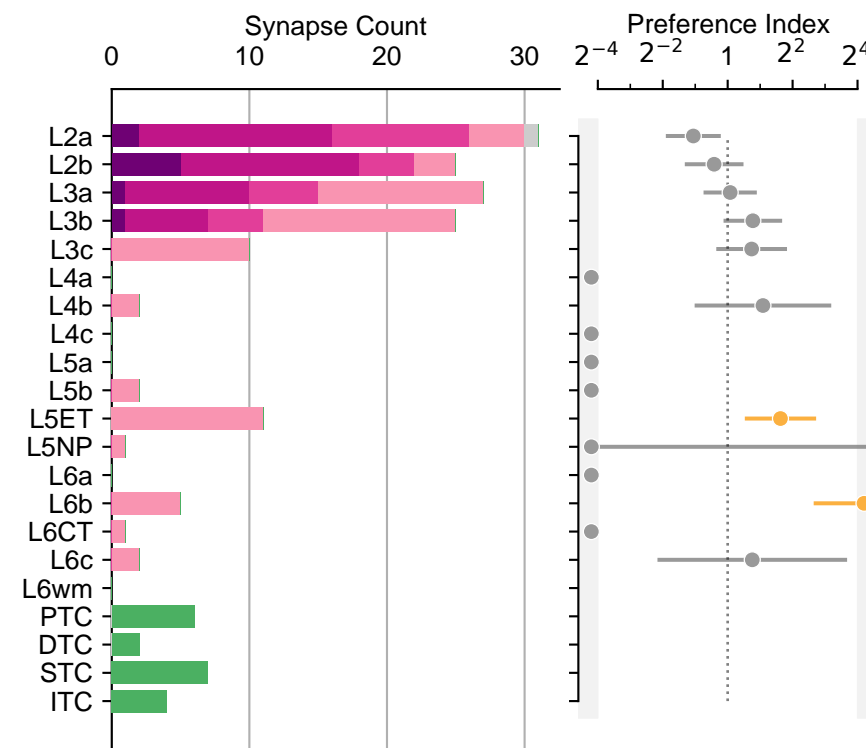

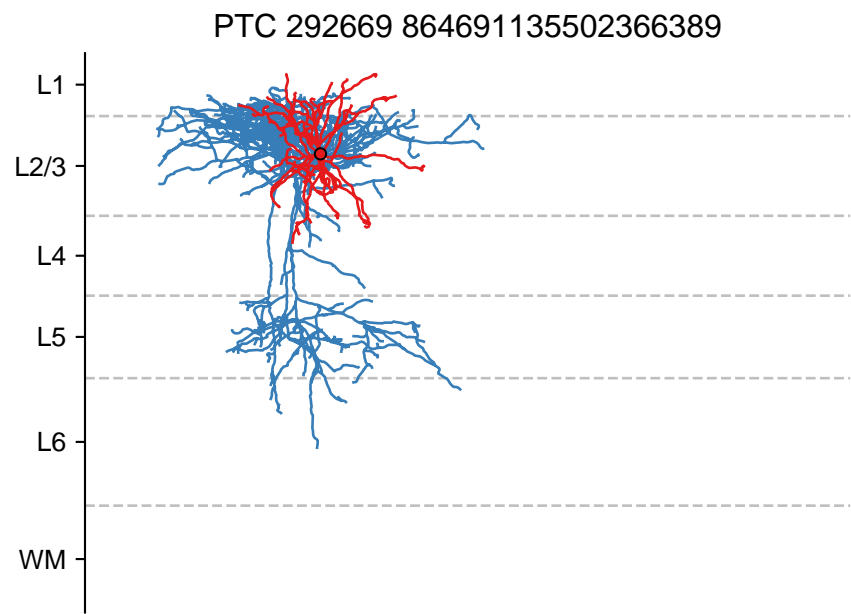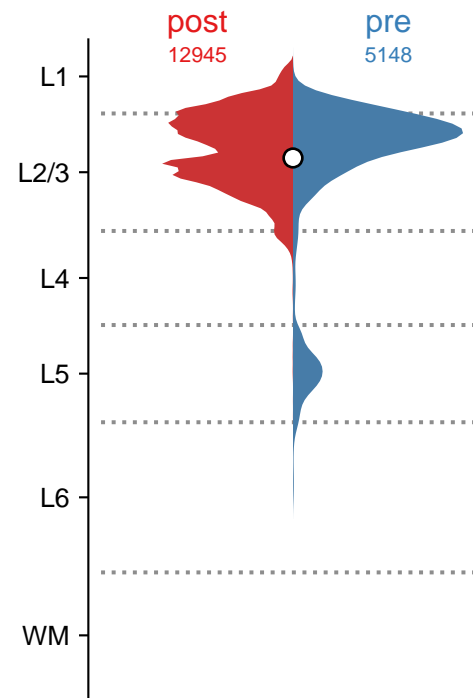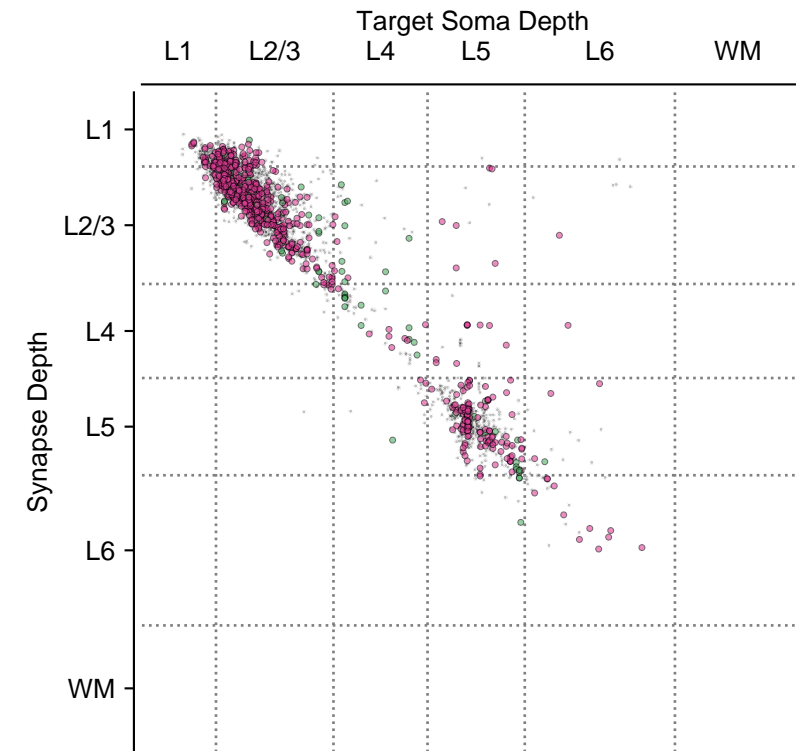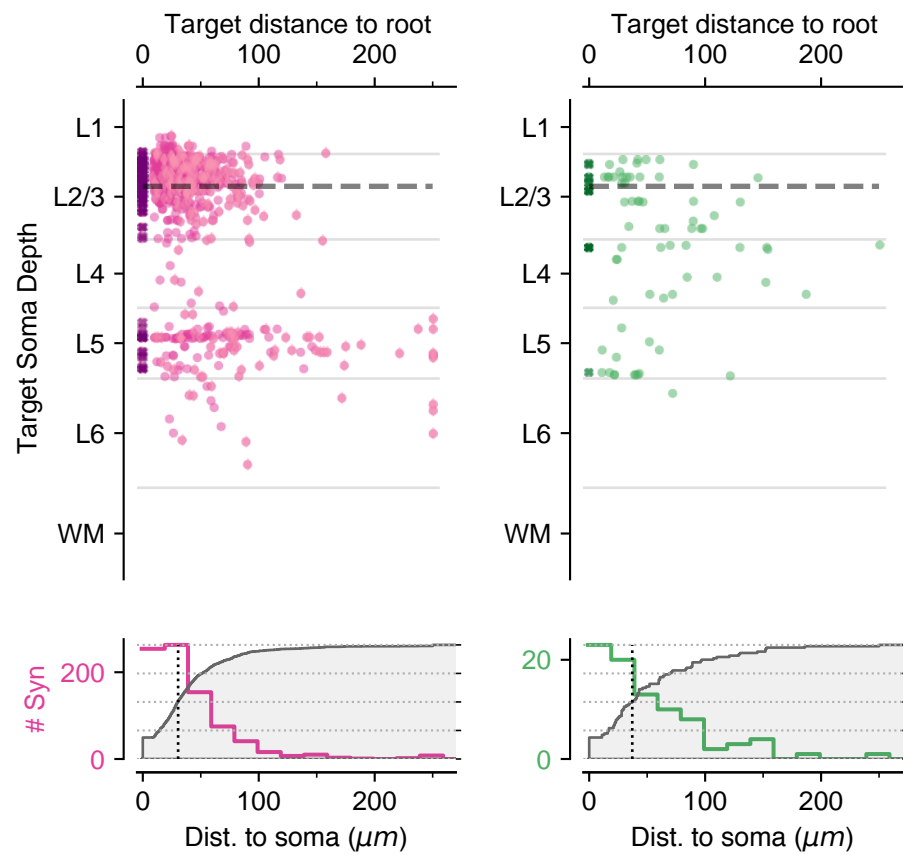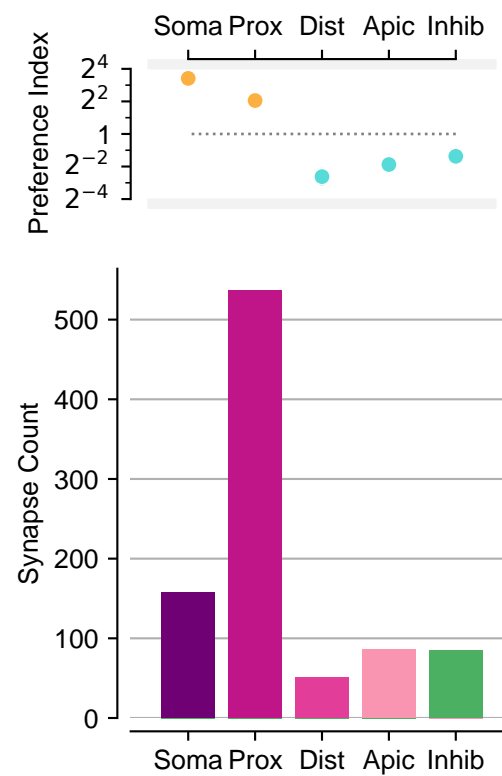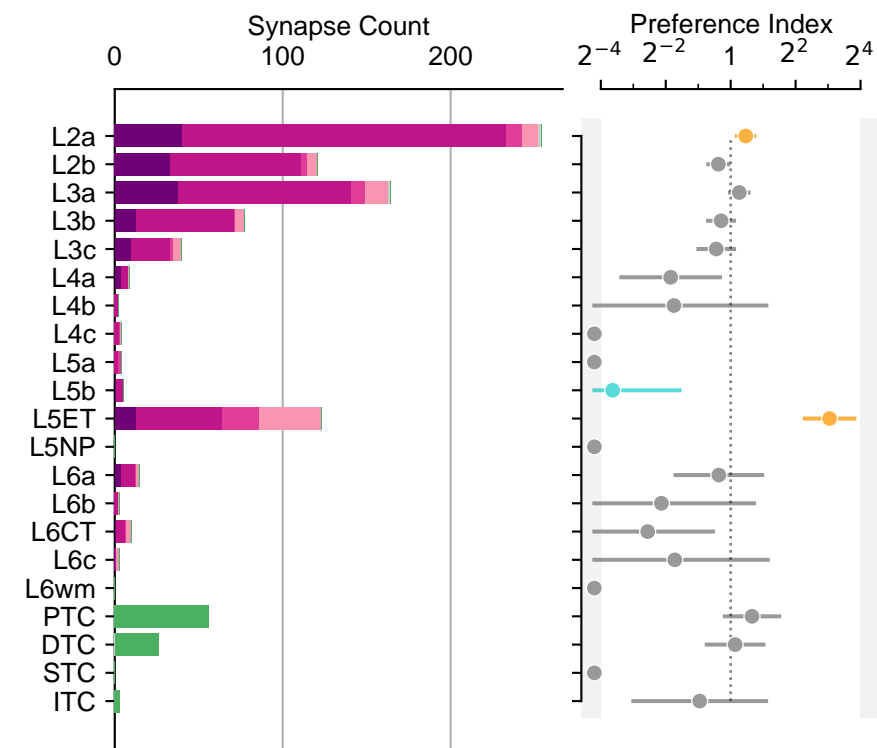

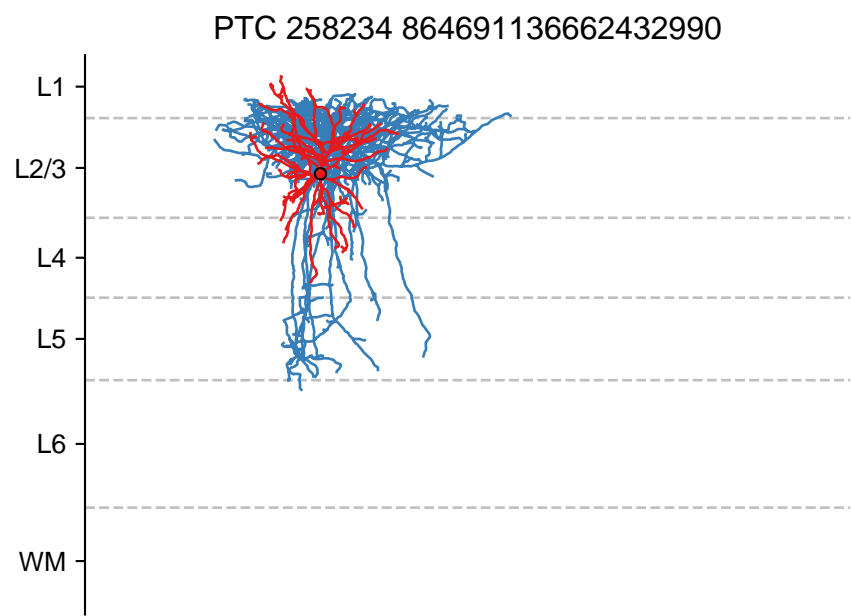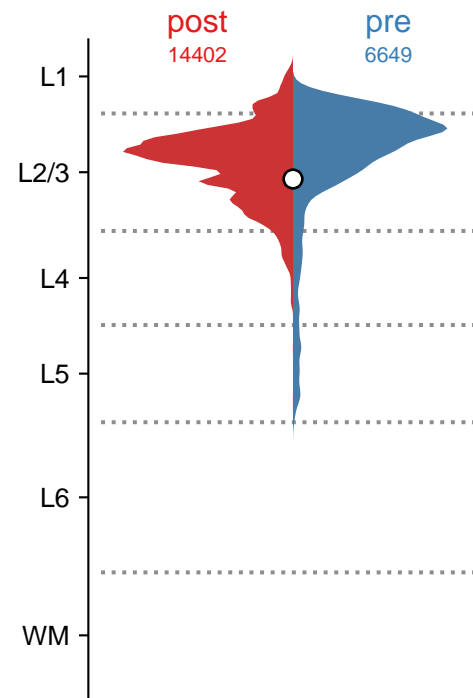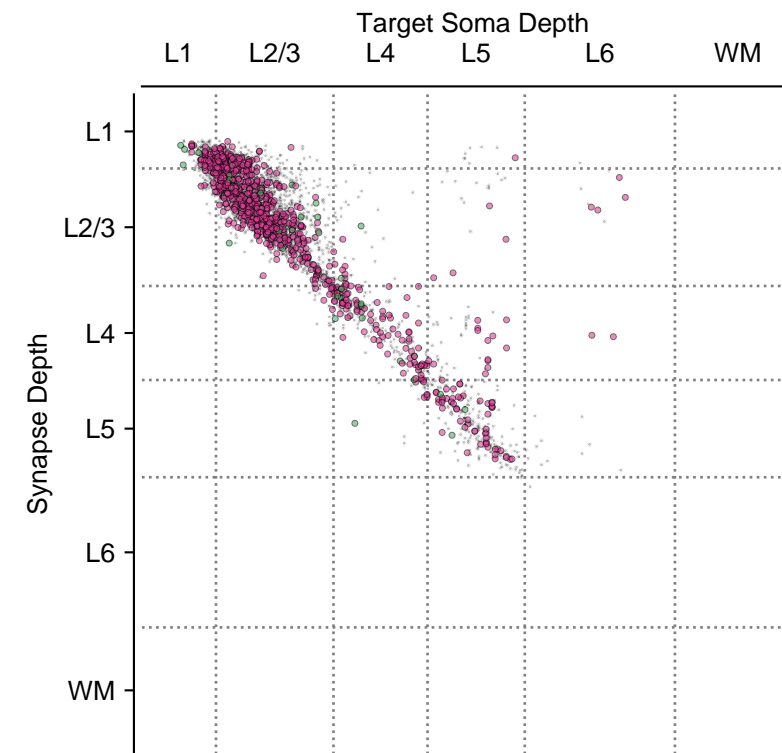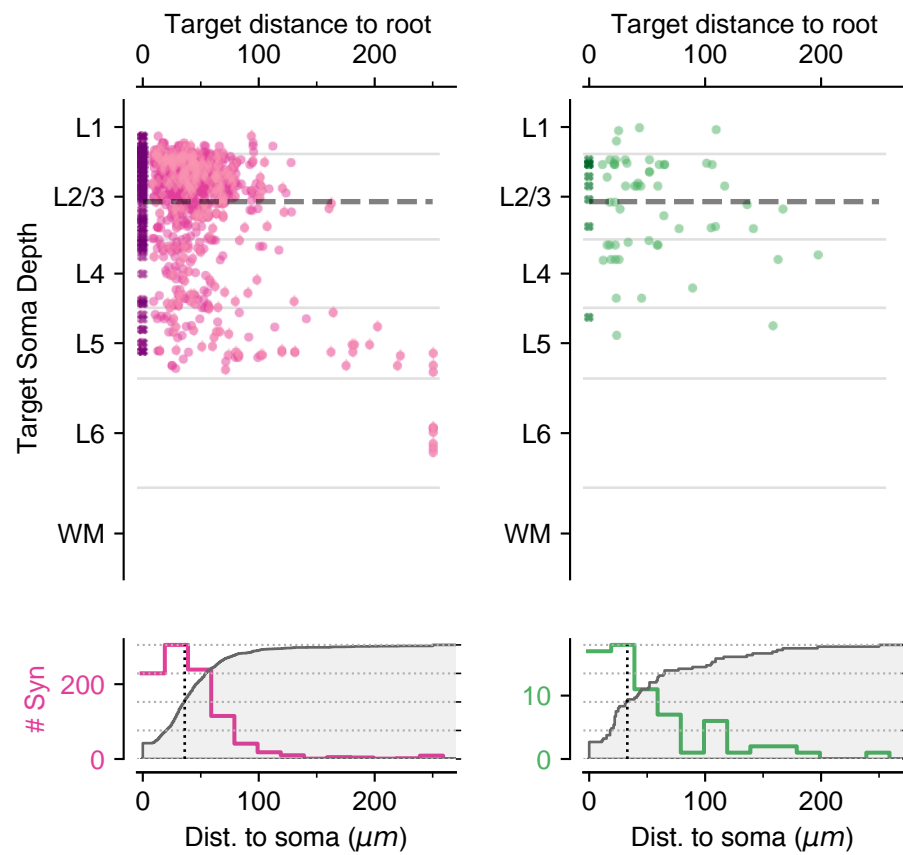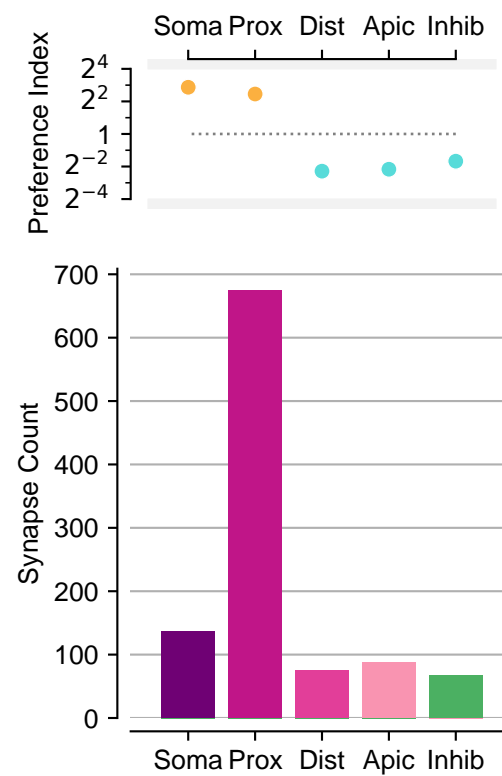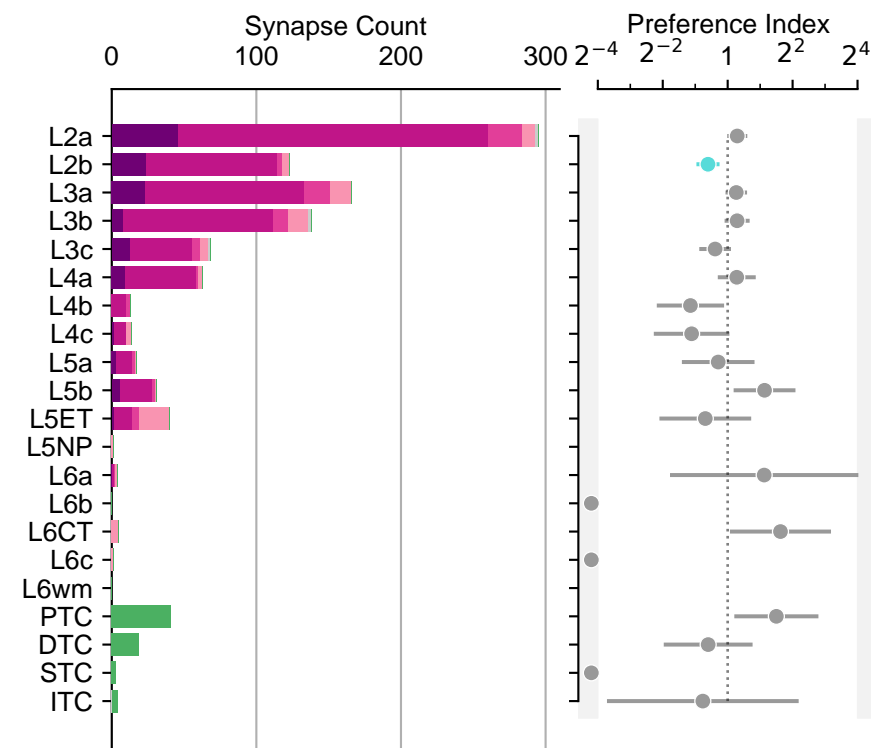

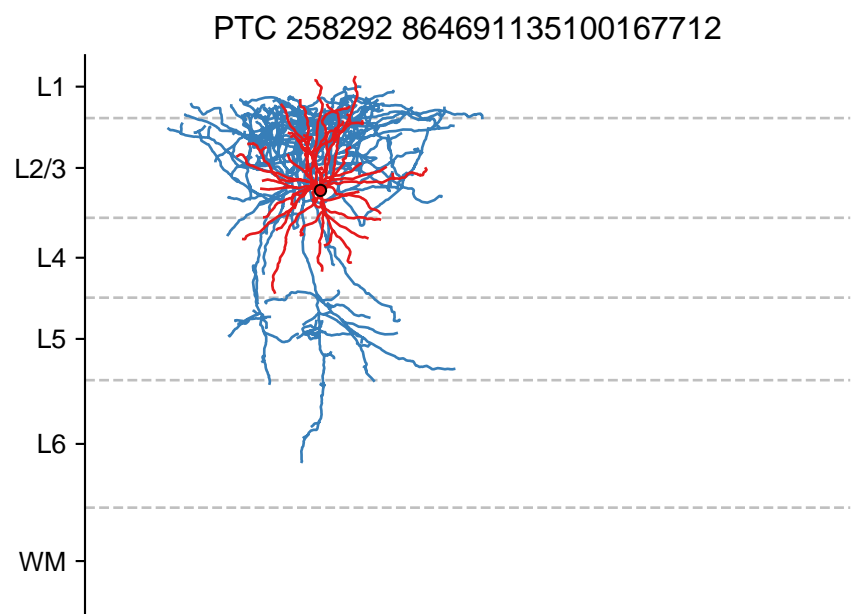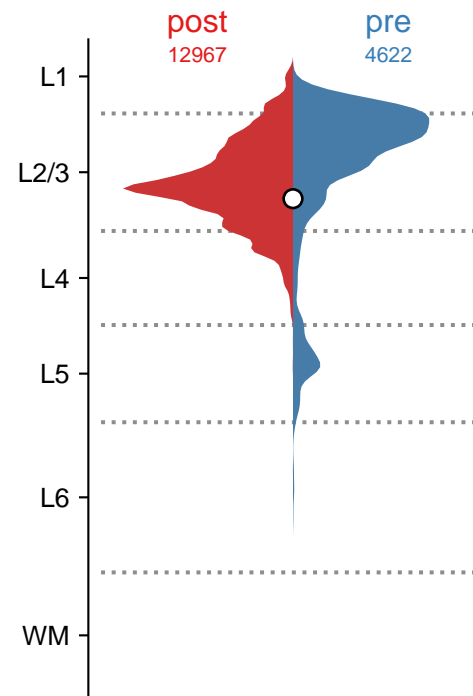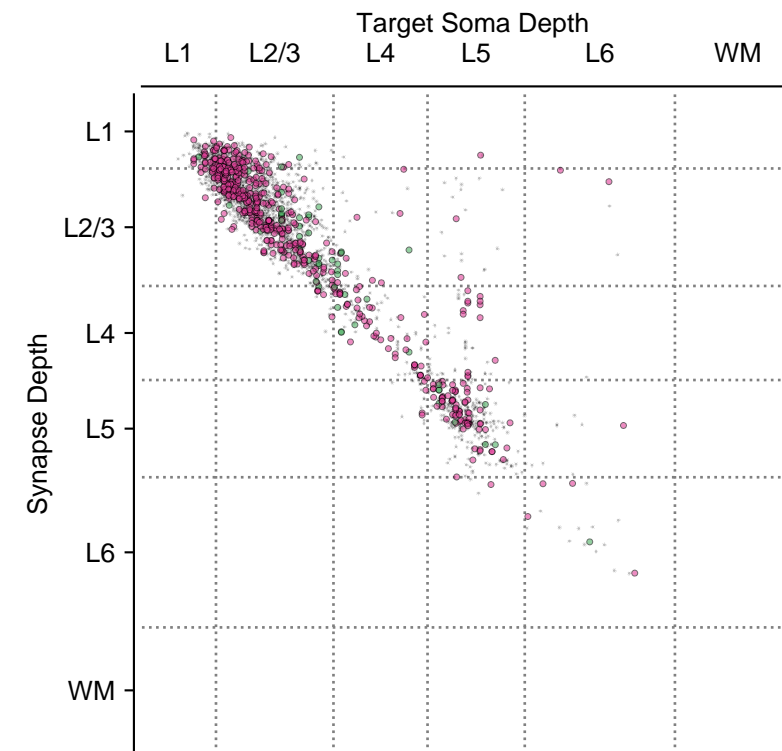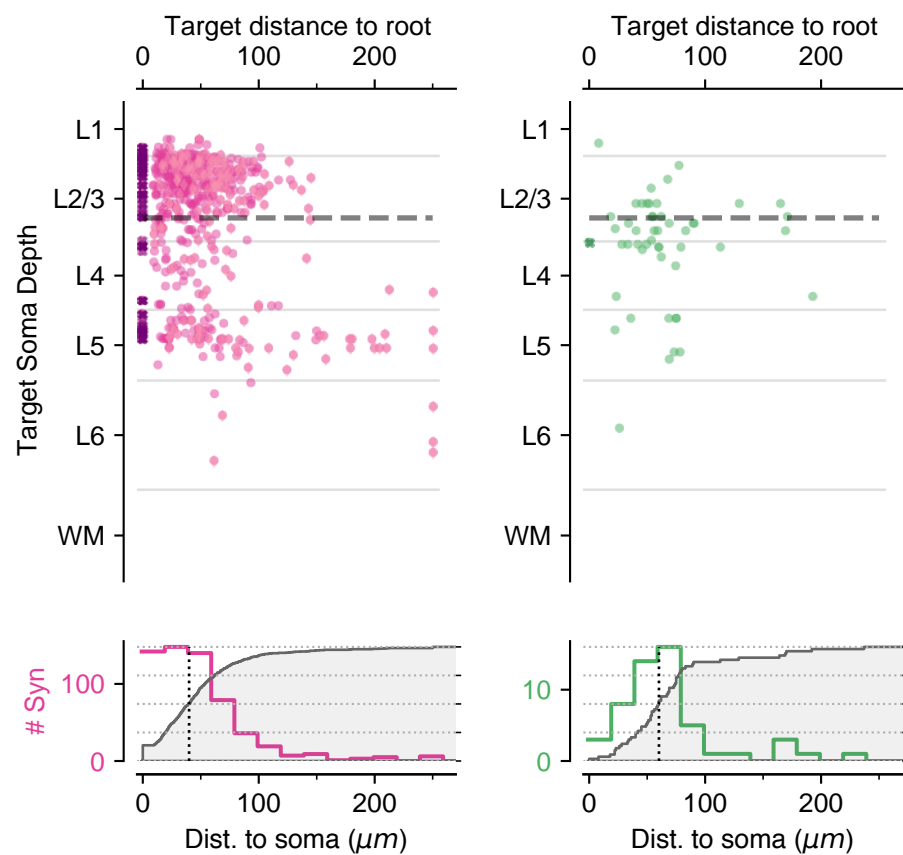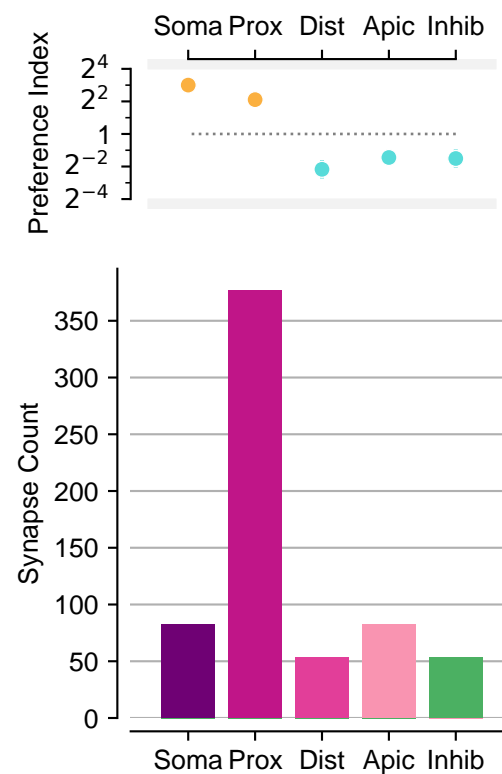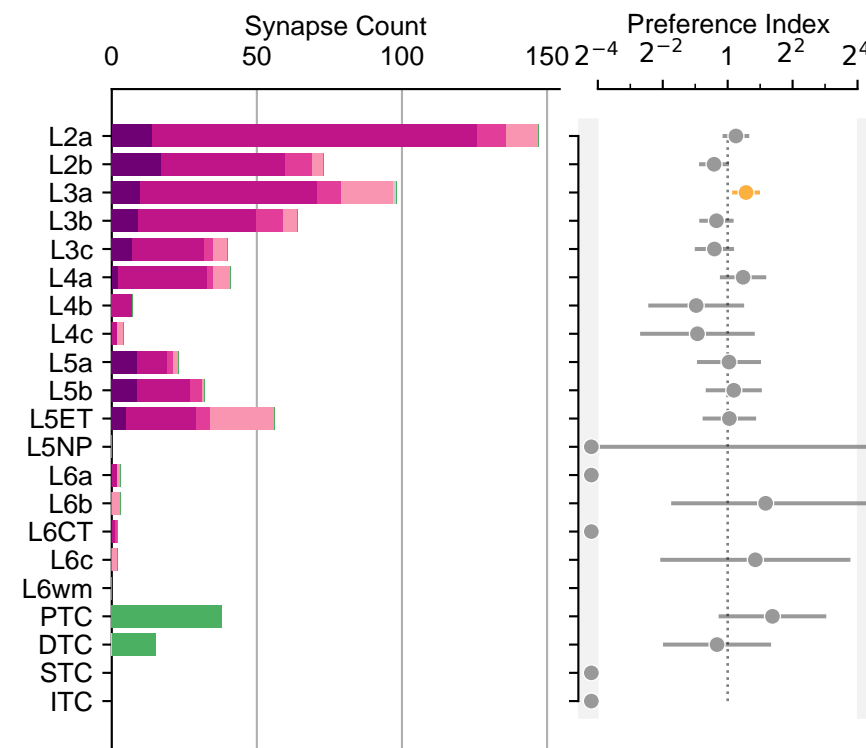

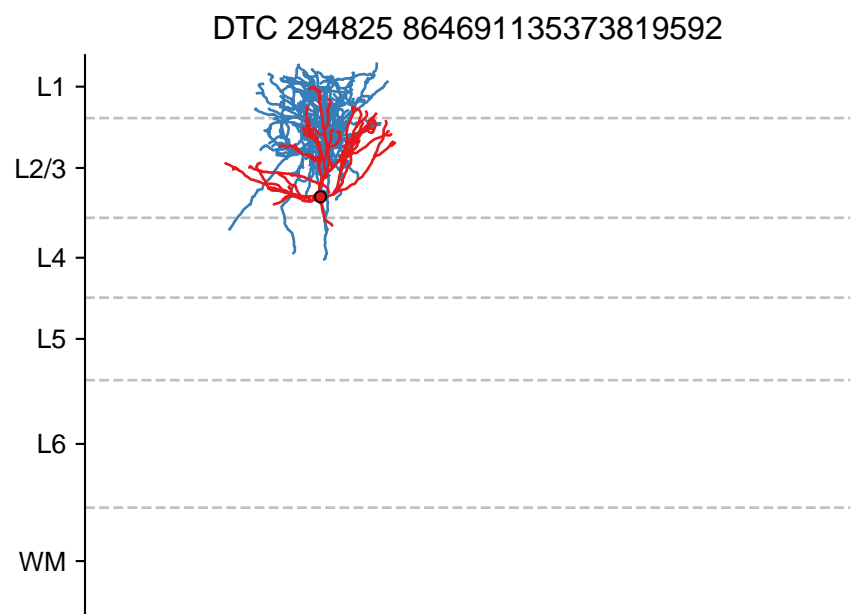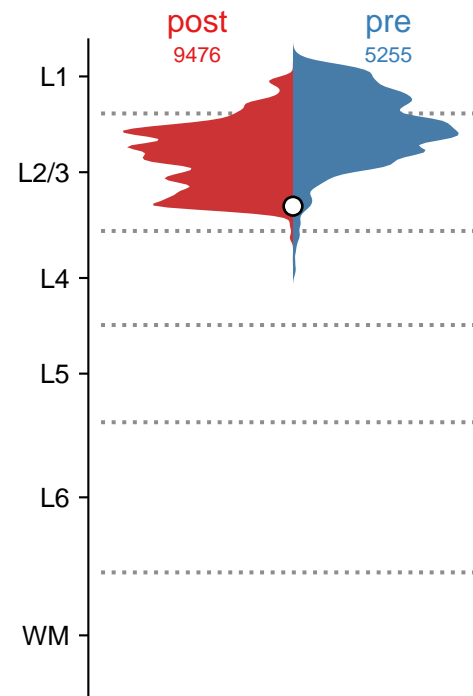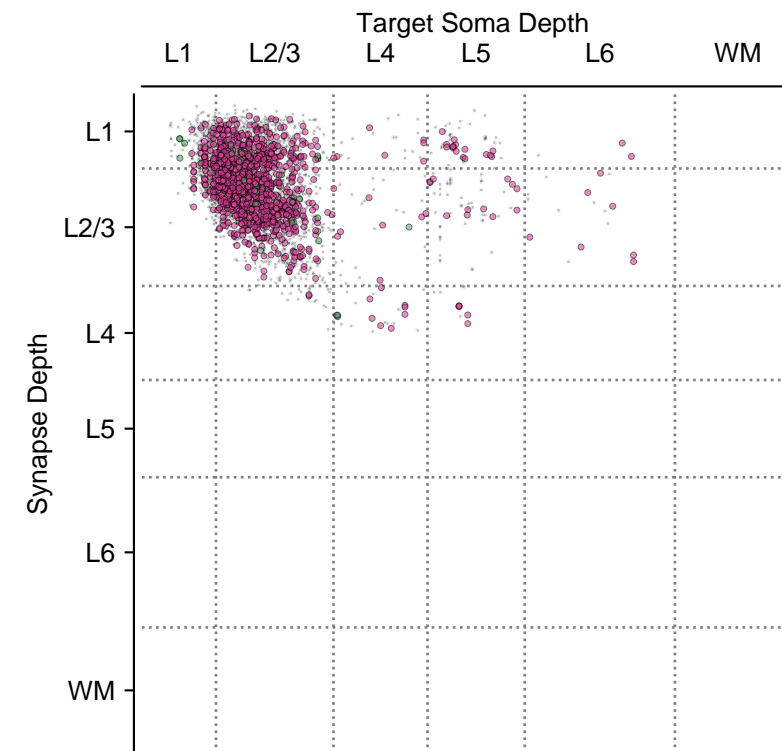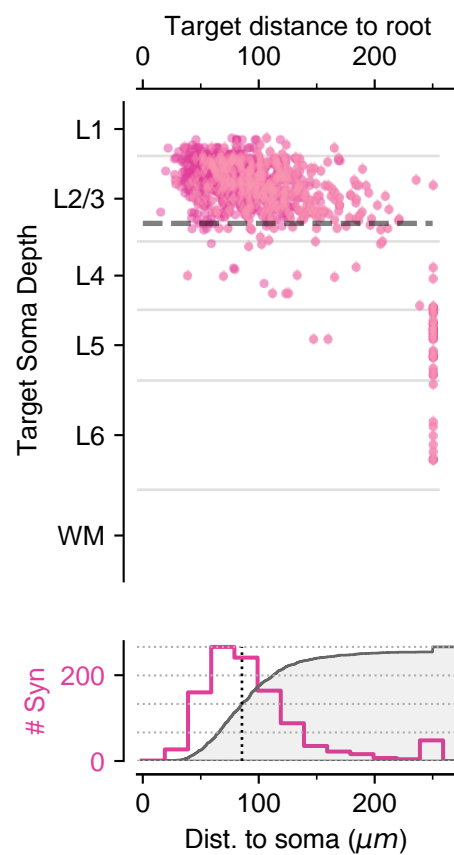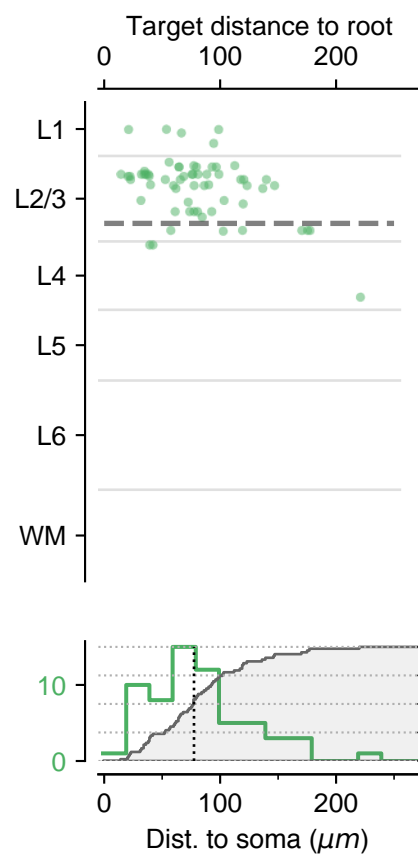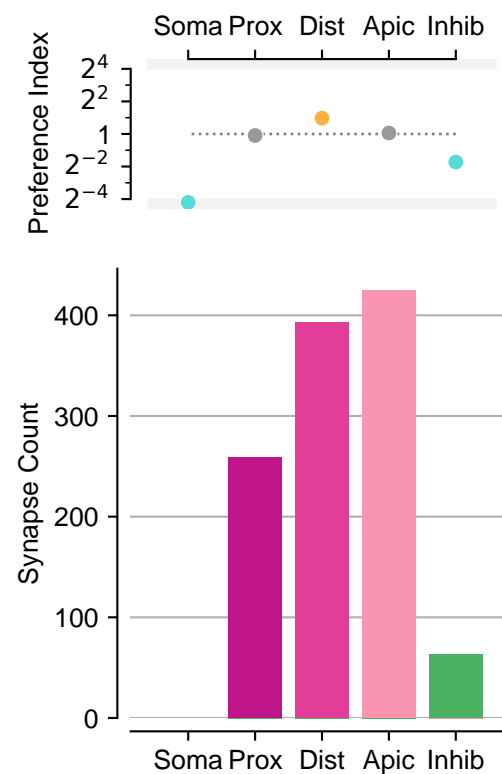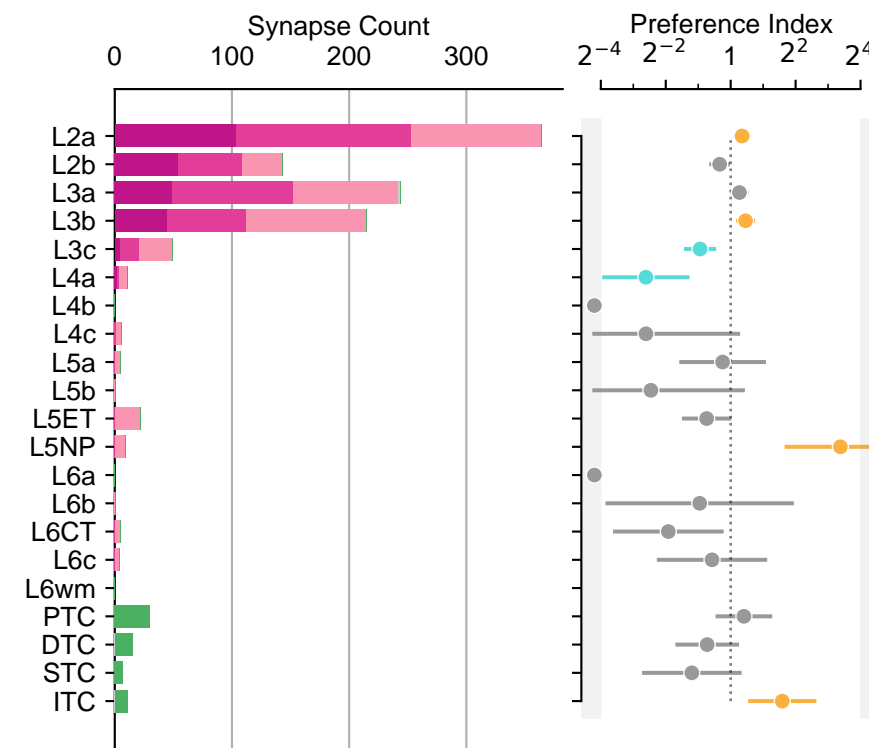

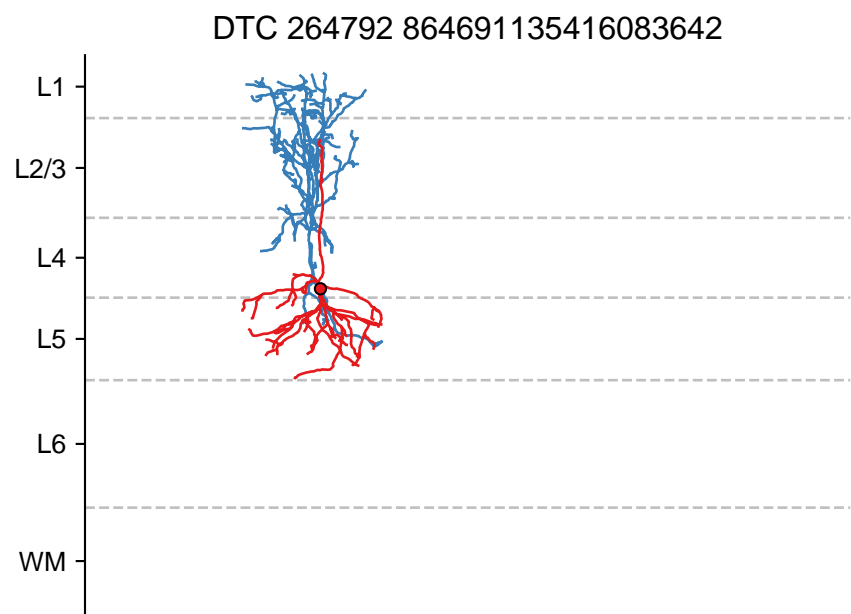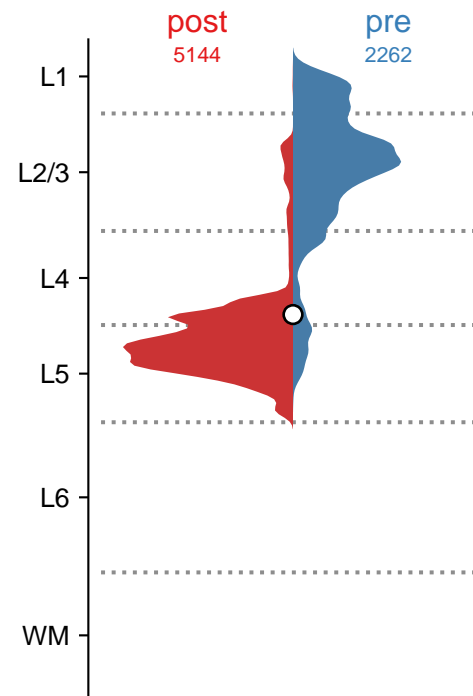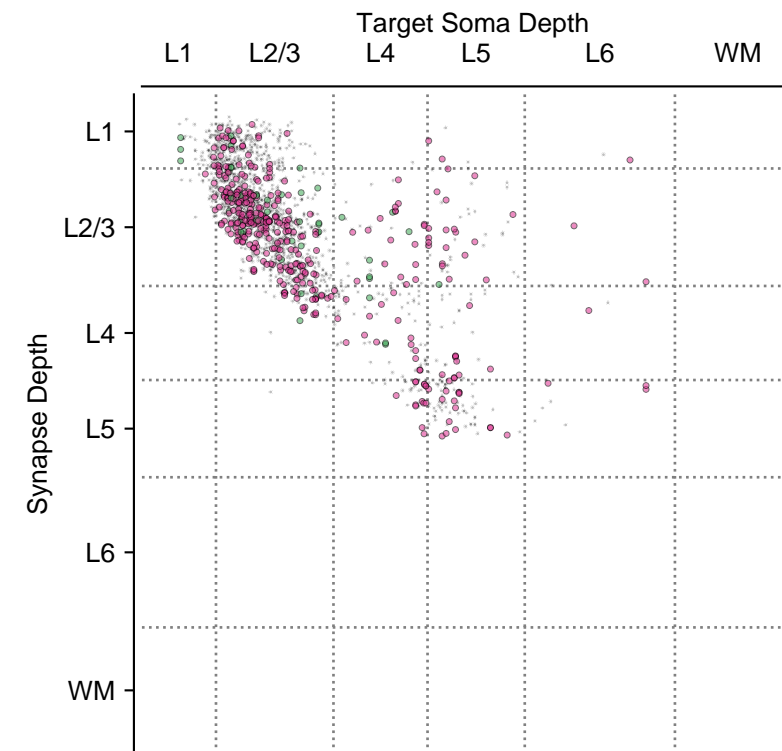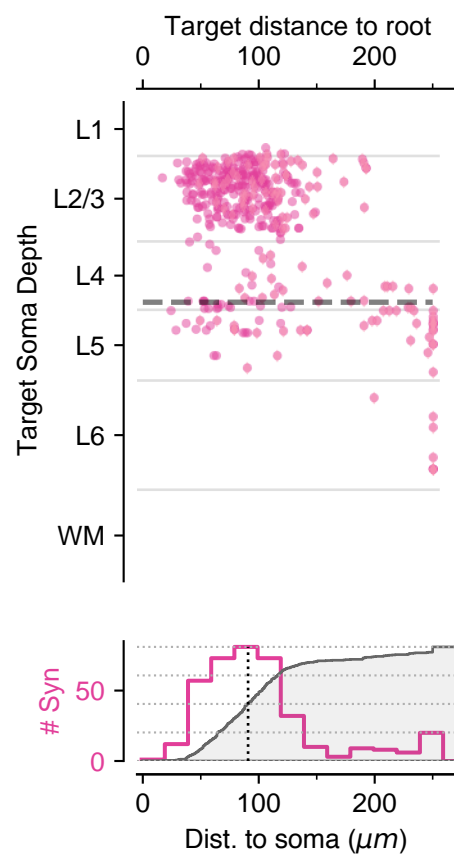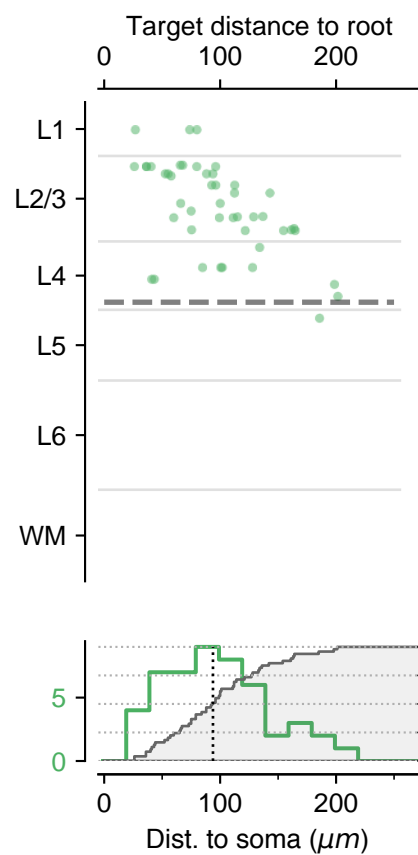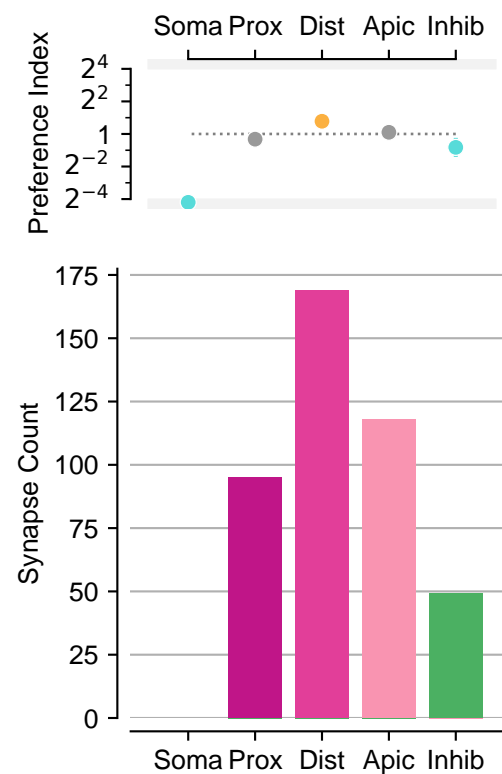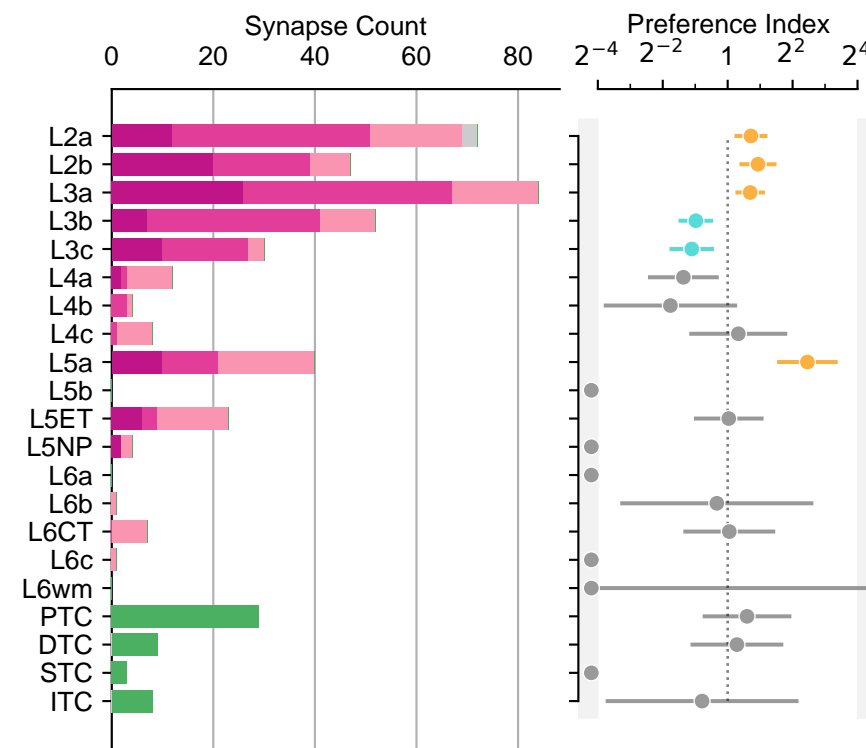

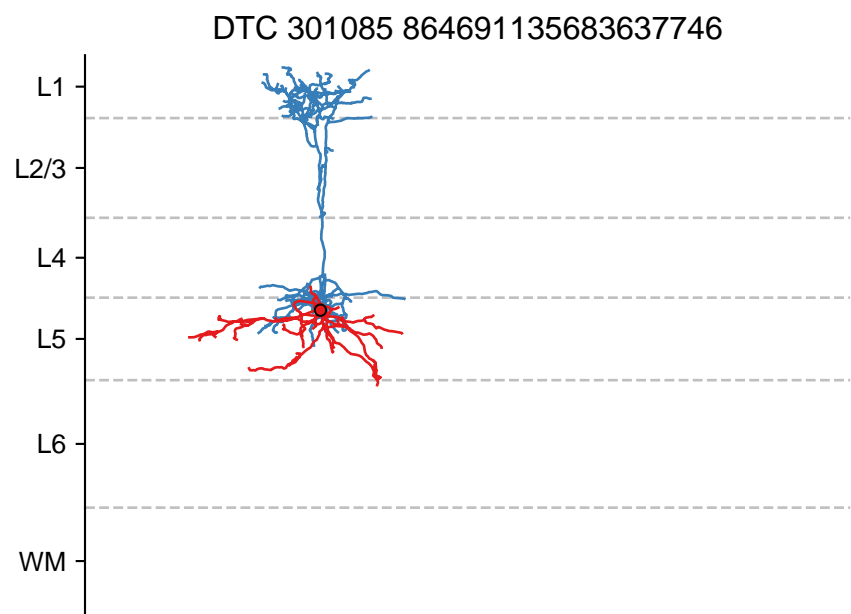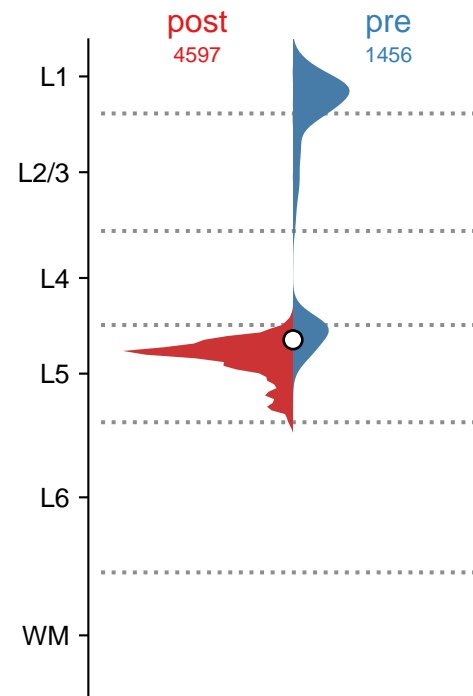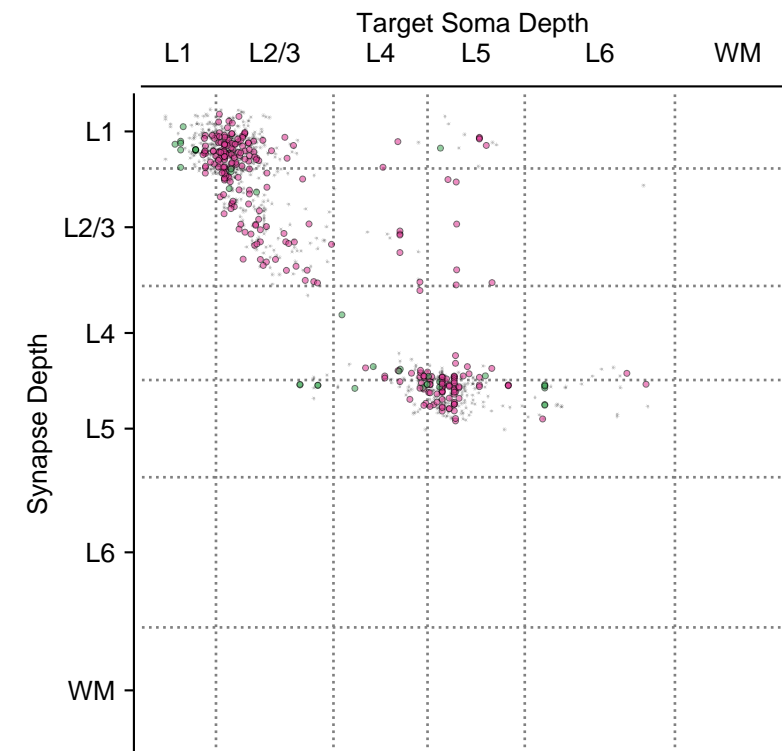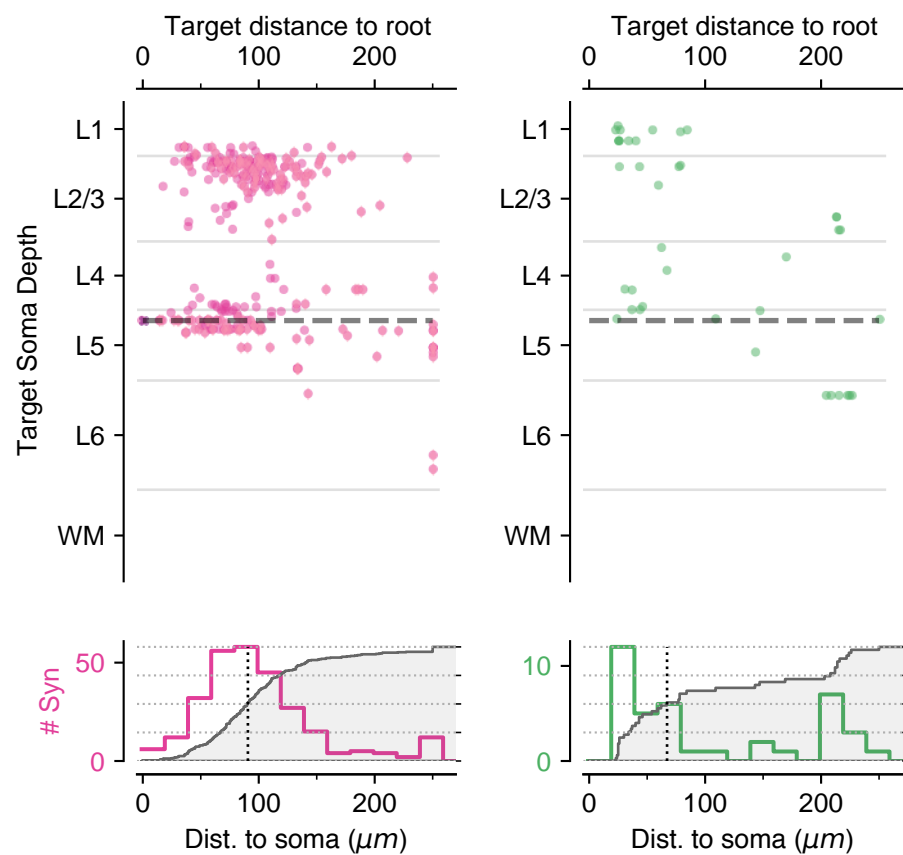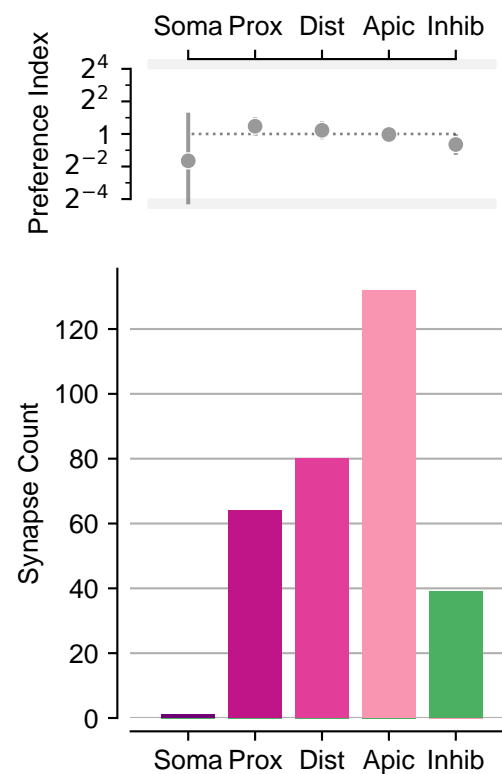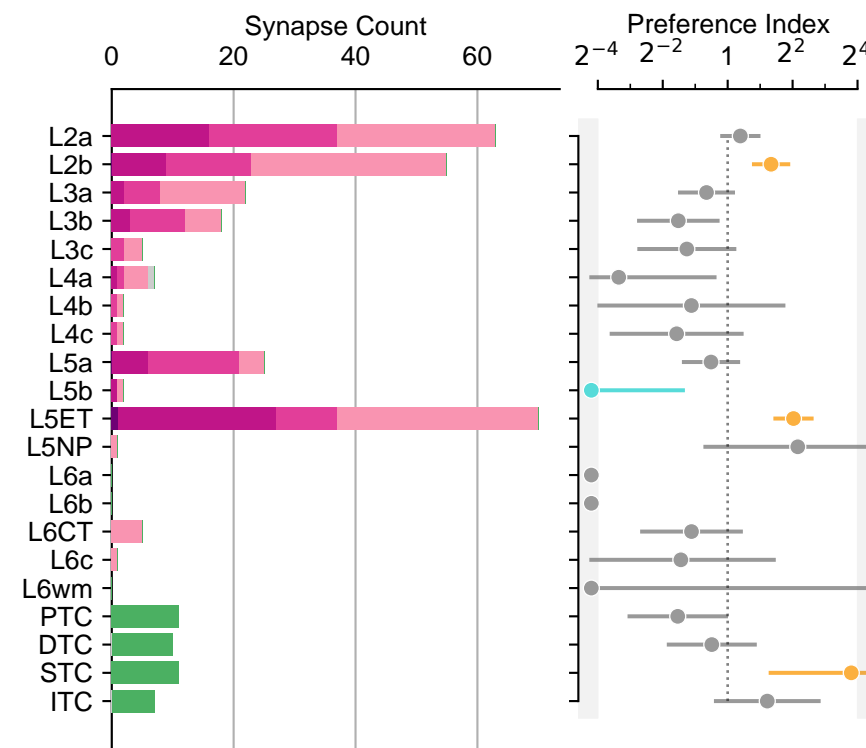

# Group 4

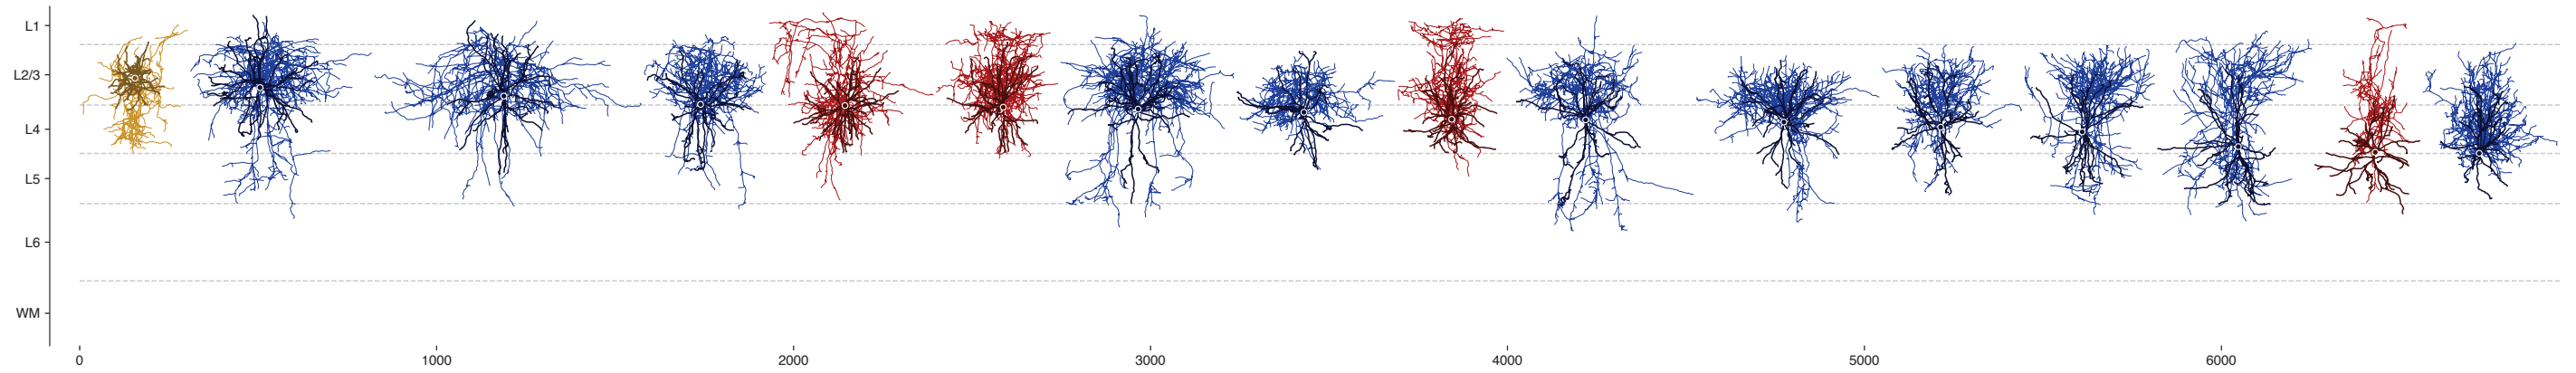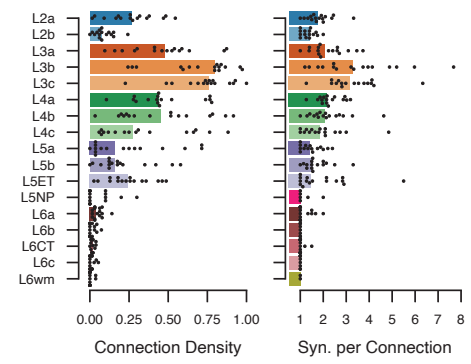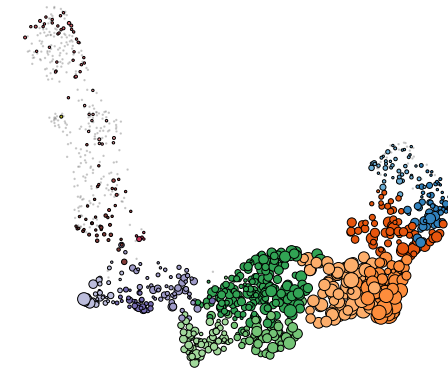



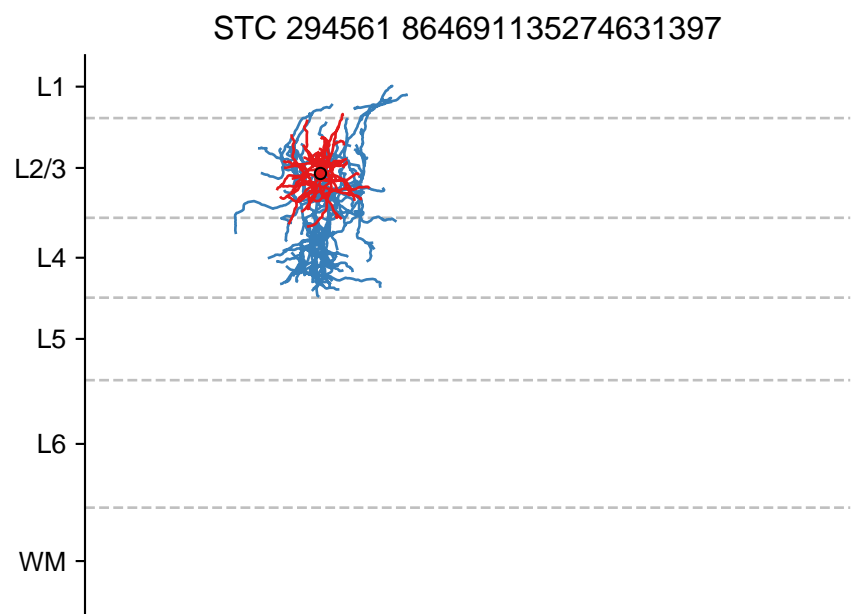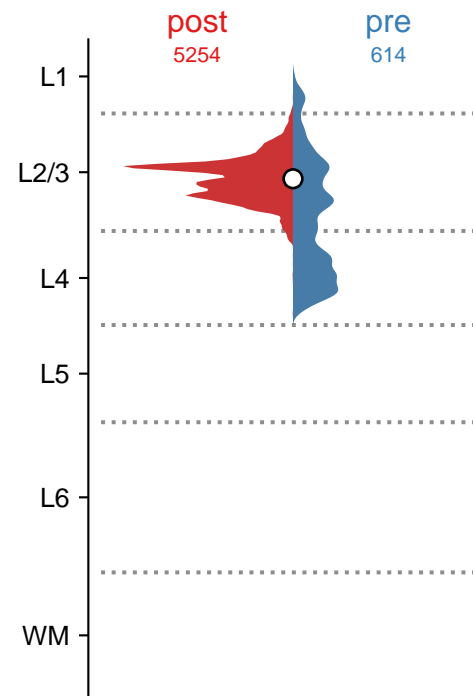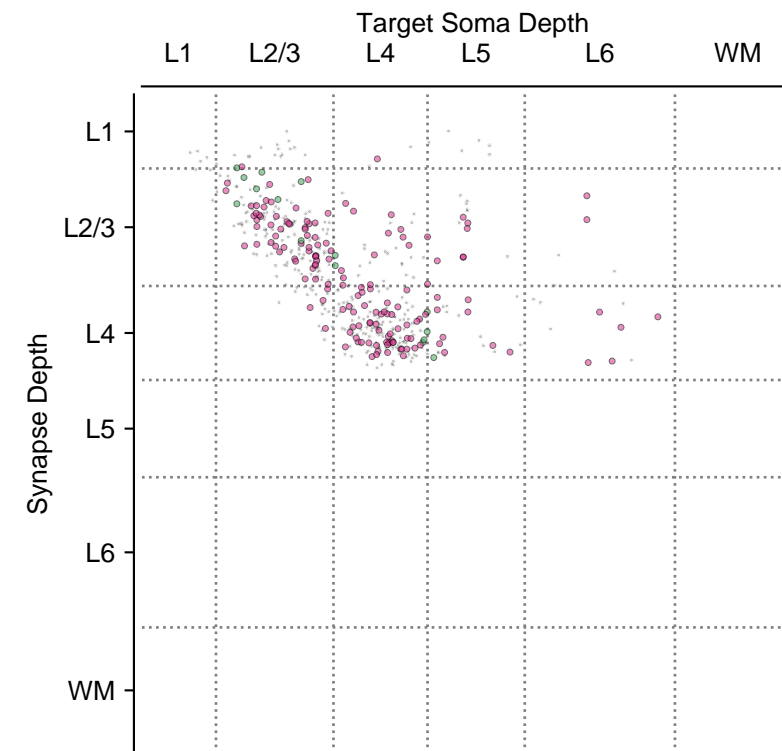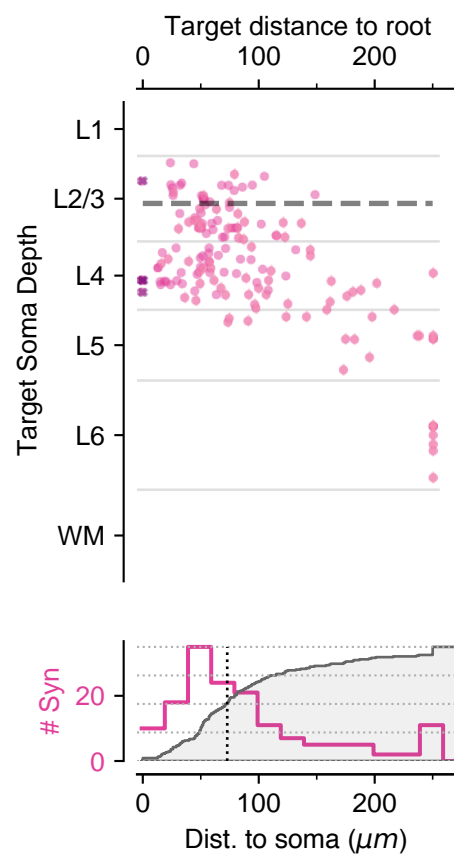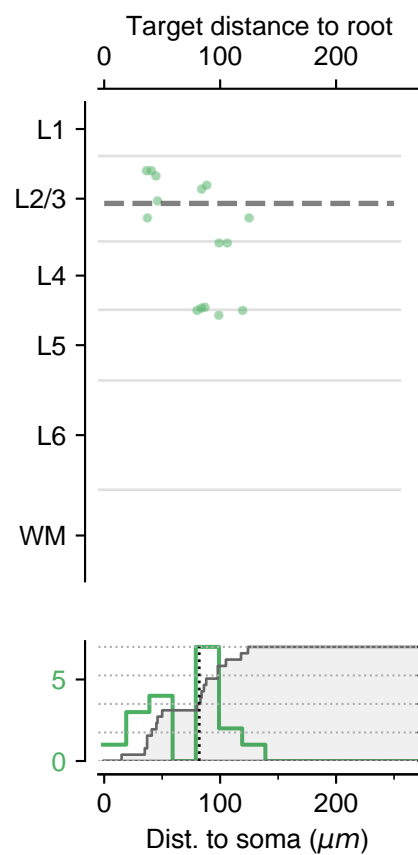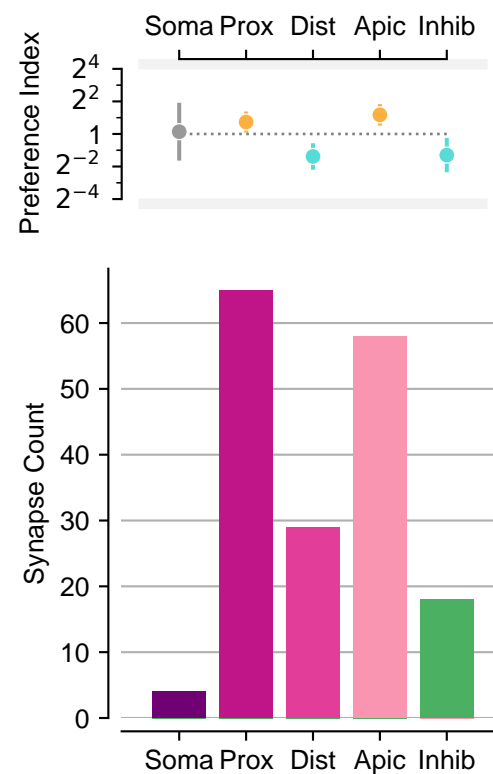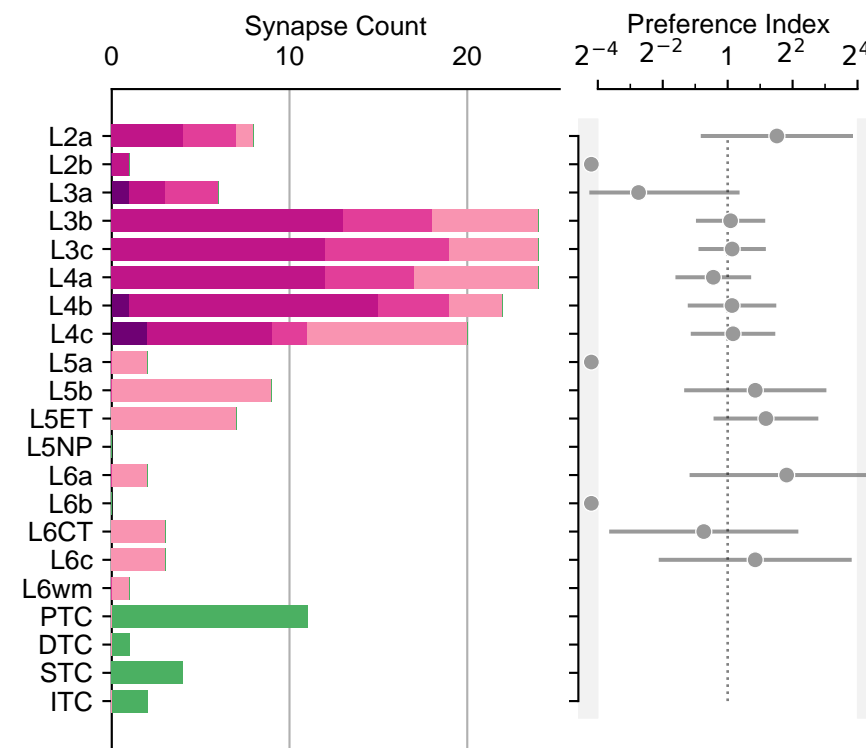

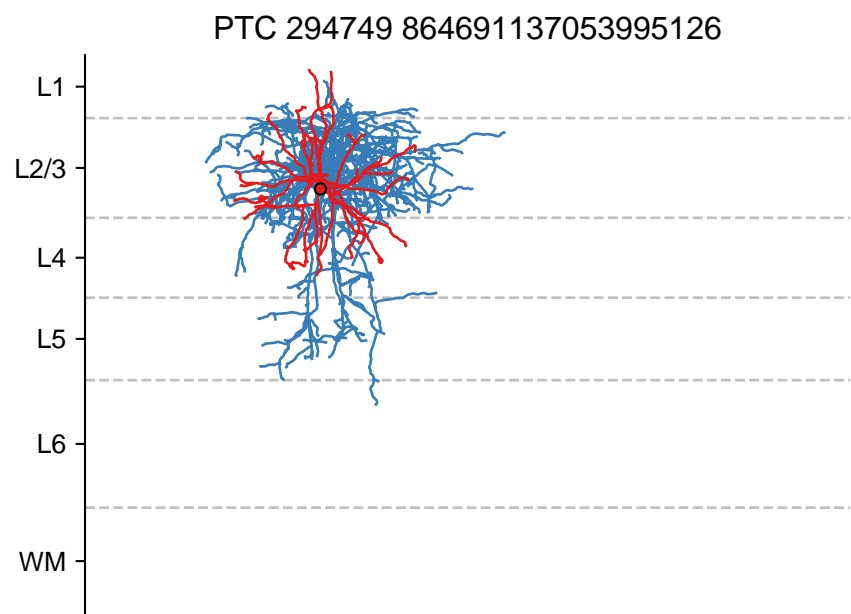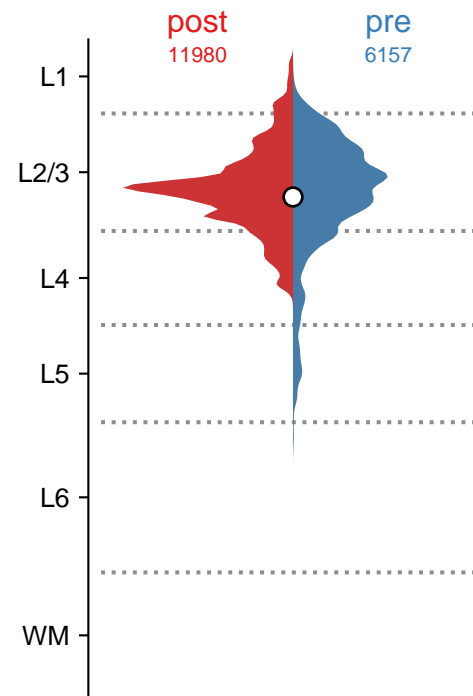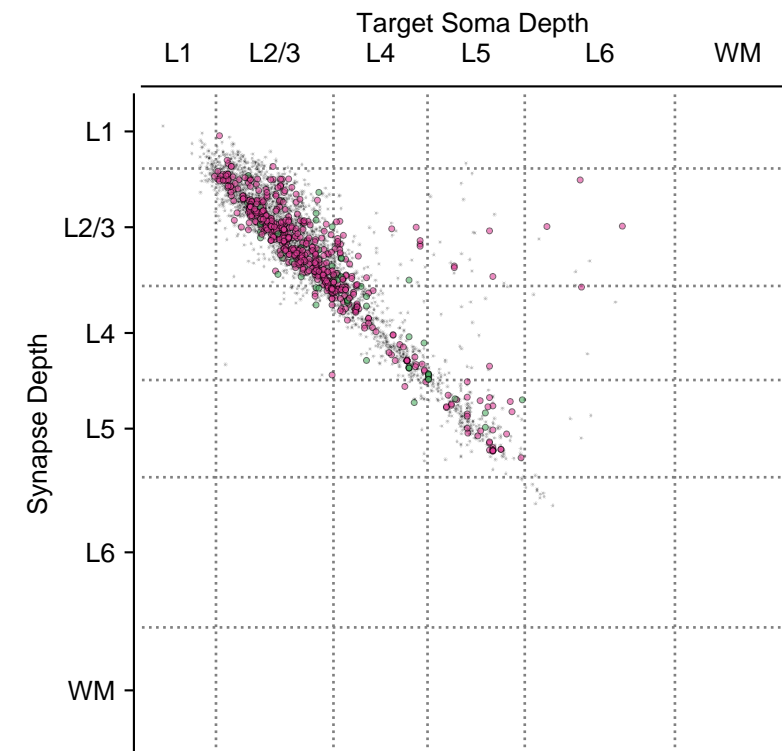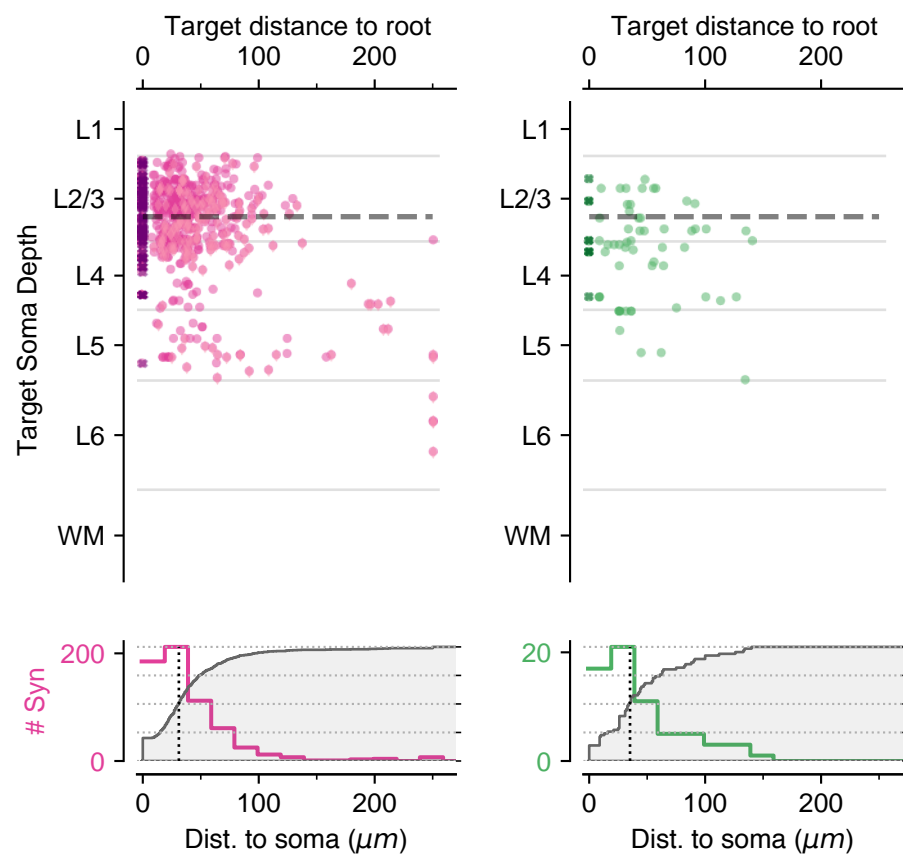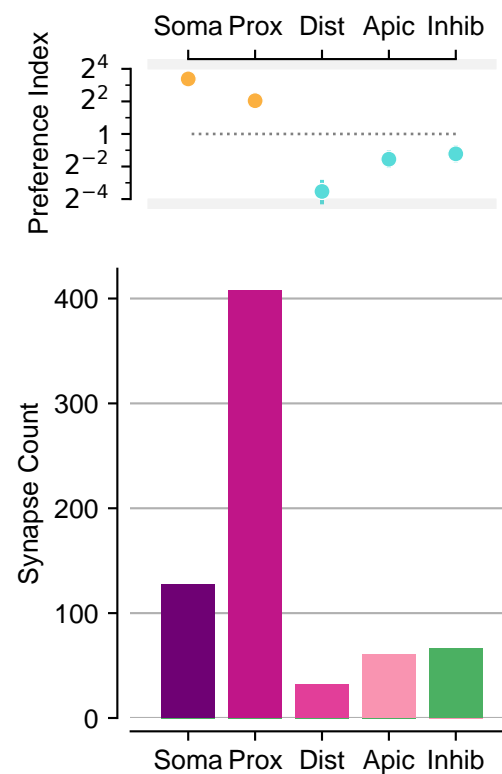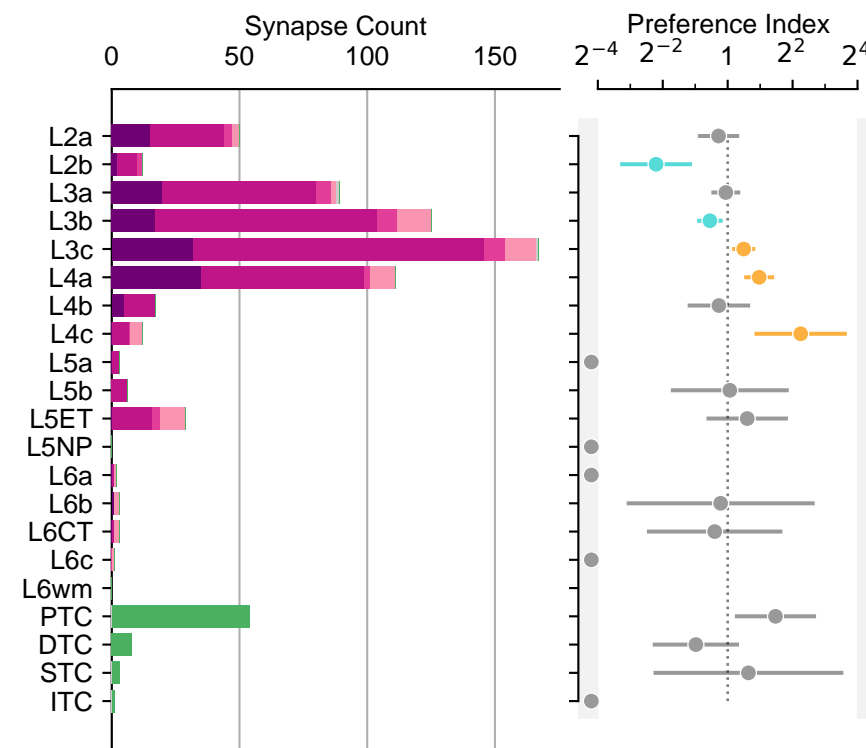

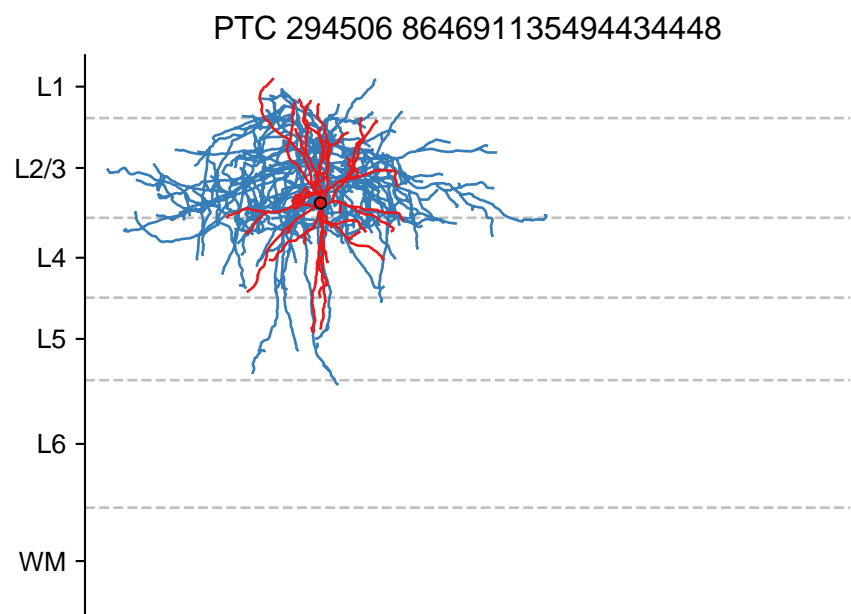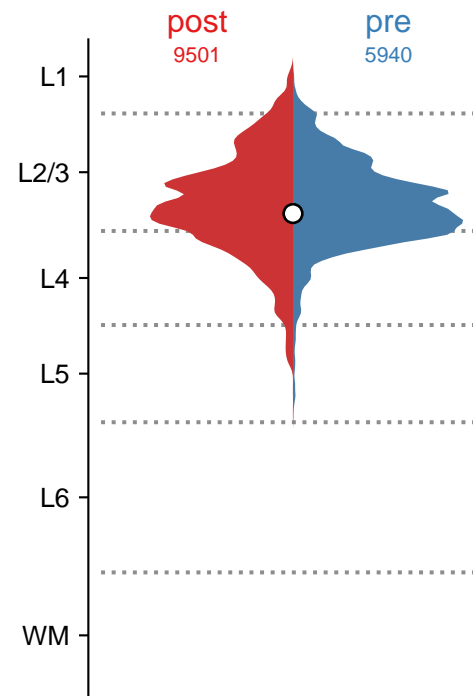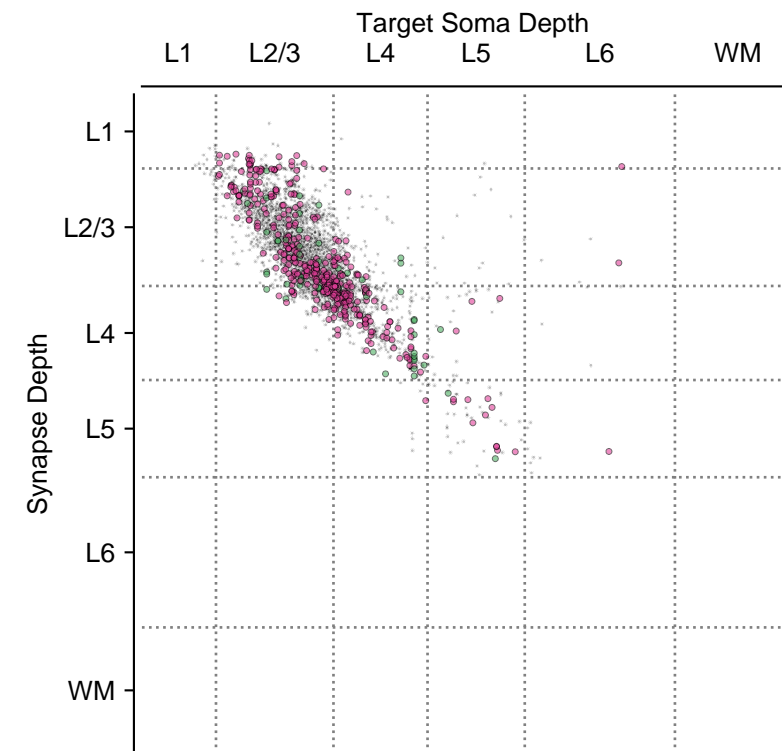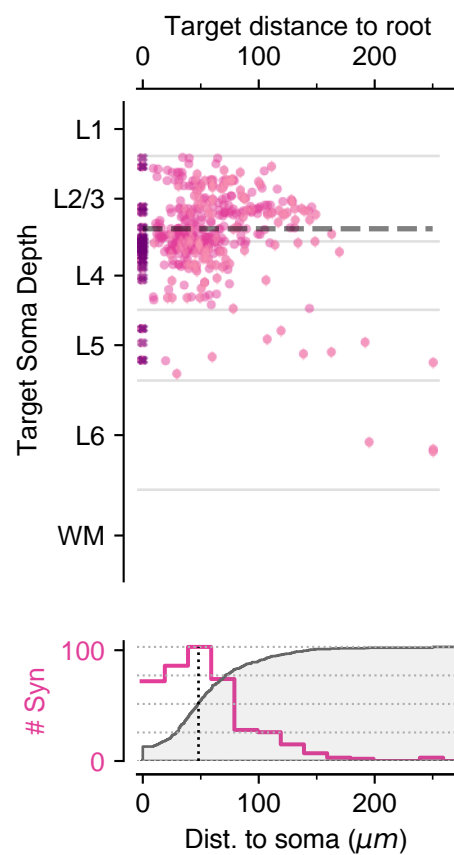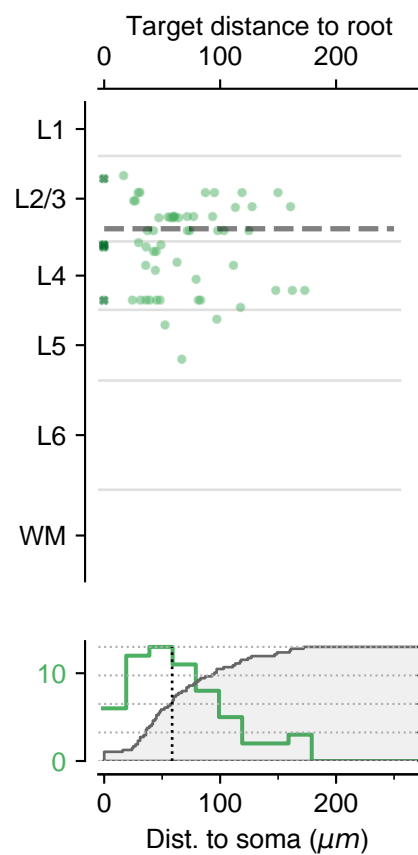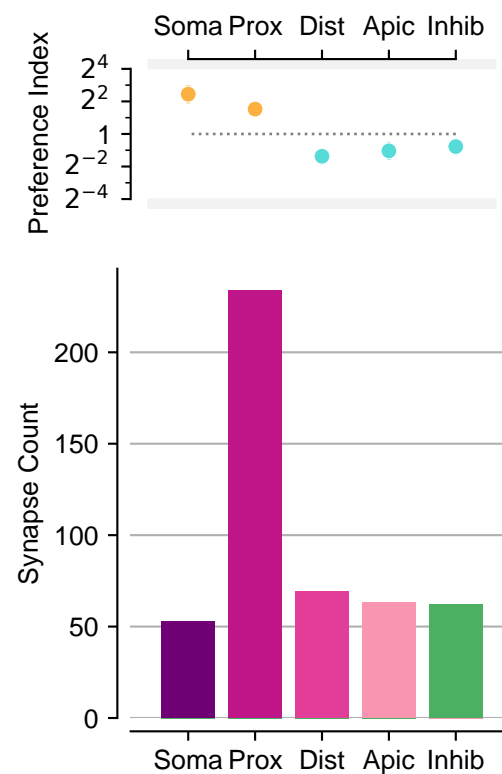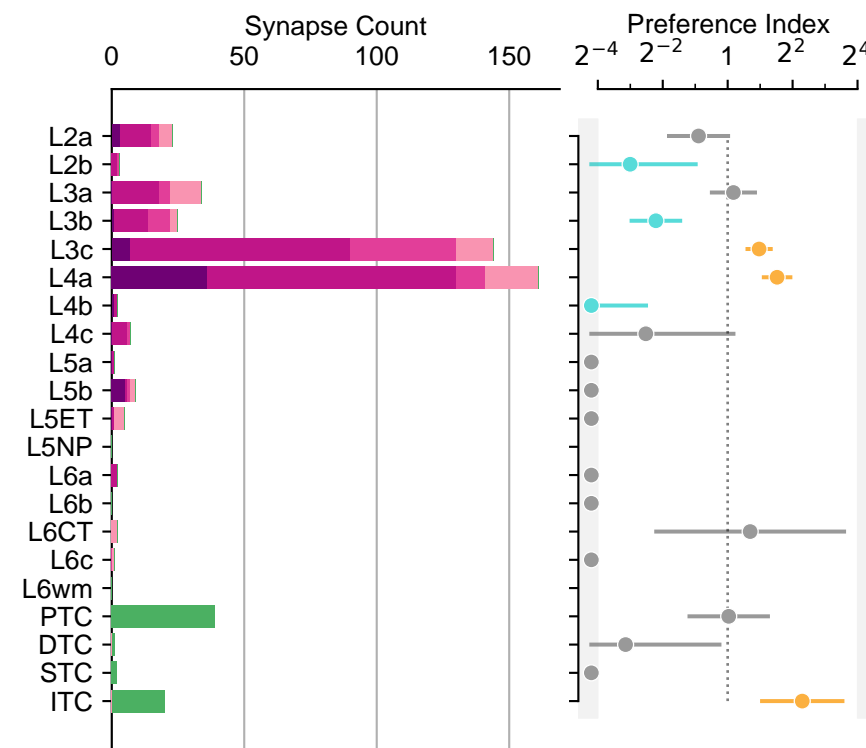

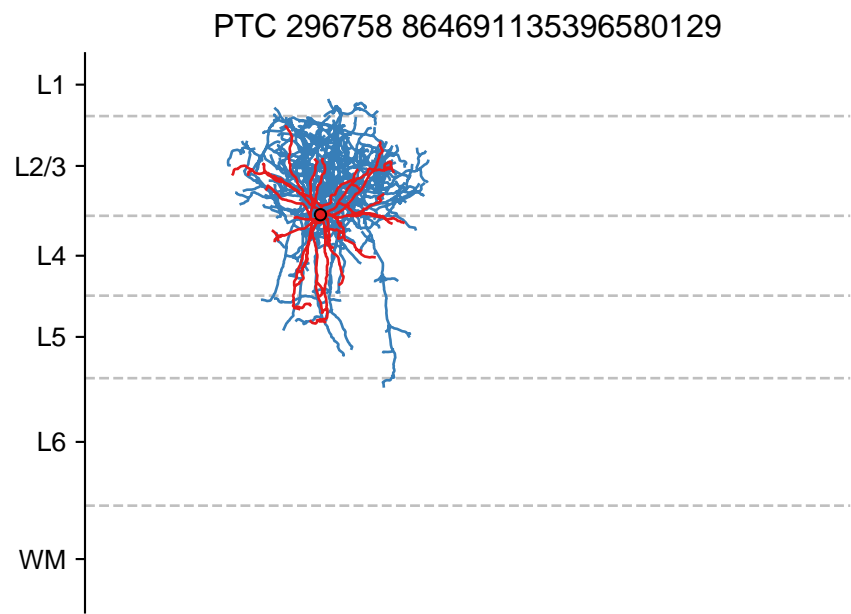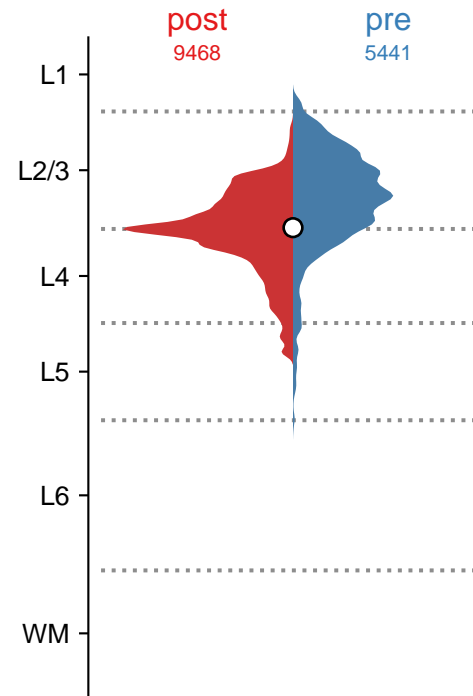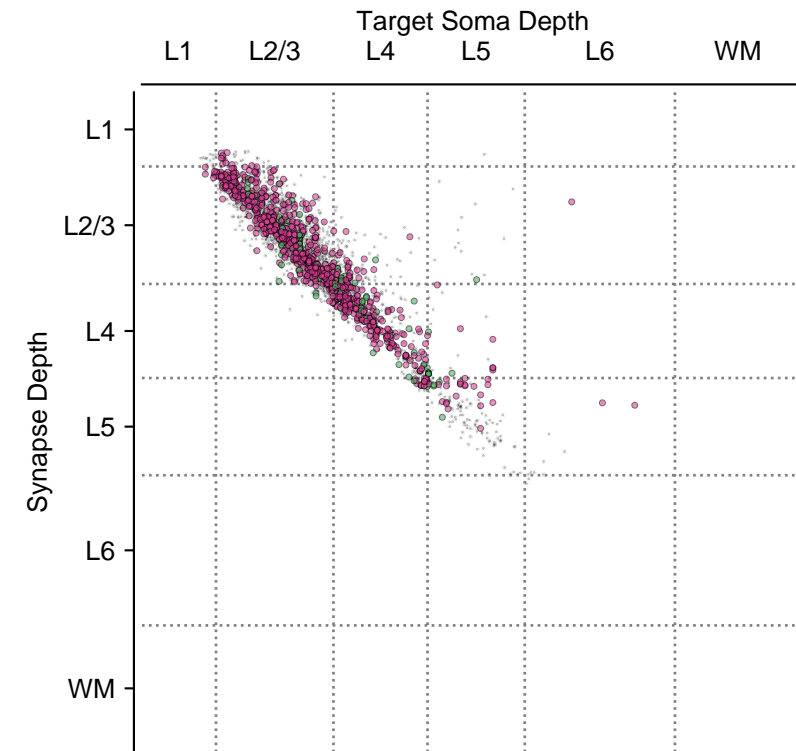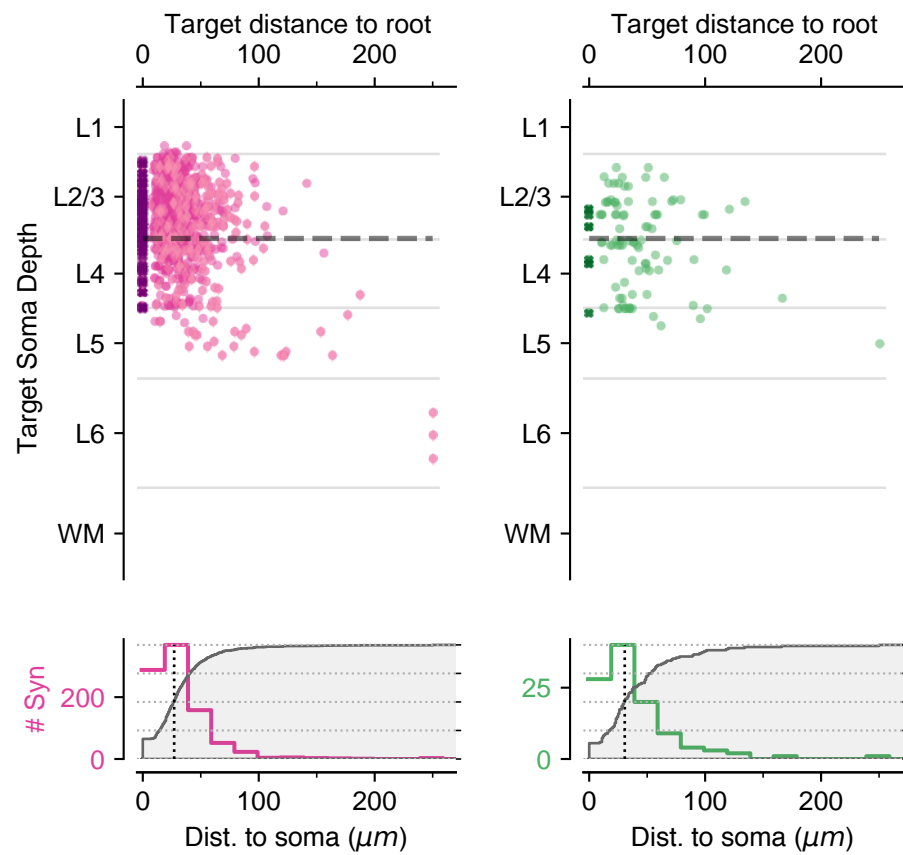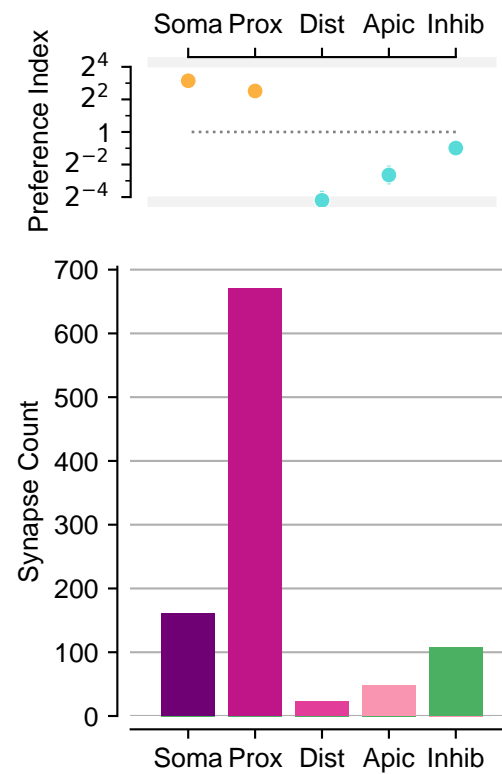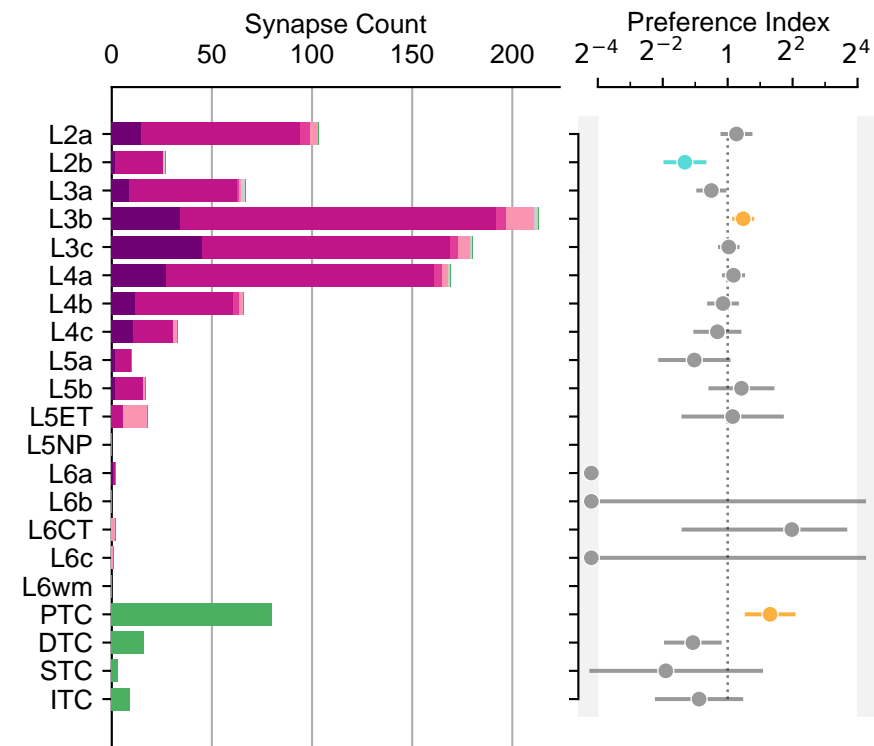

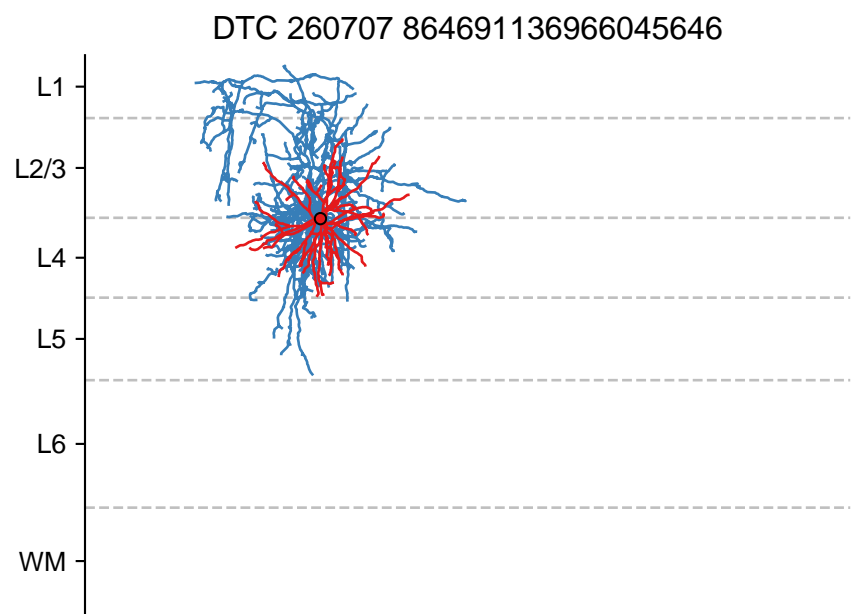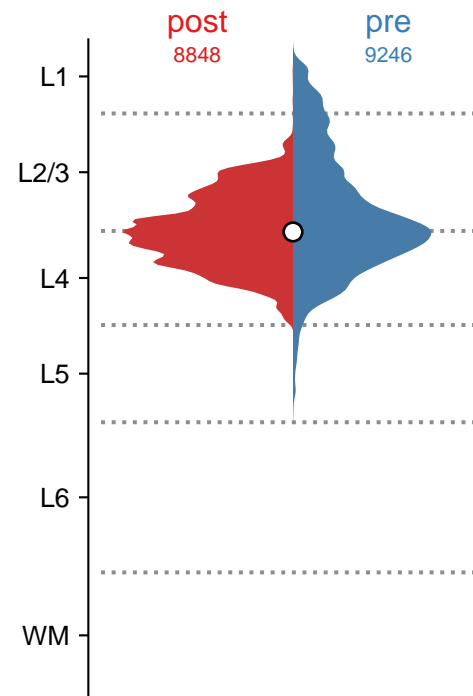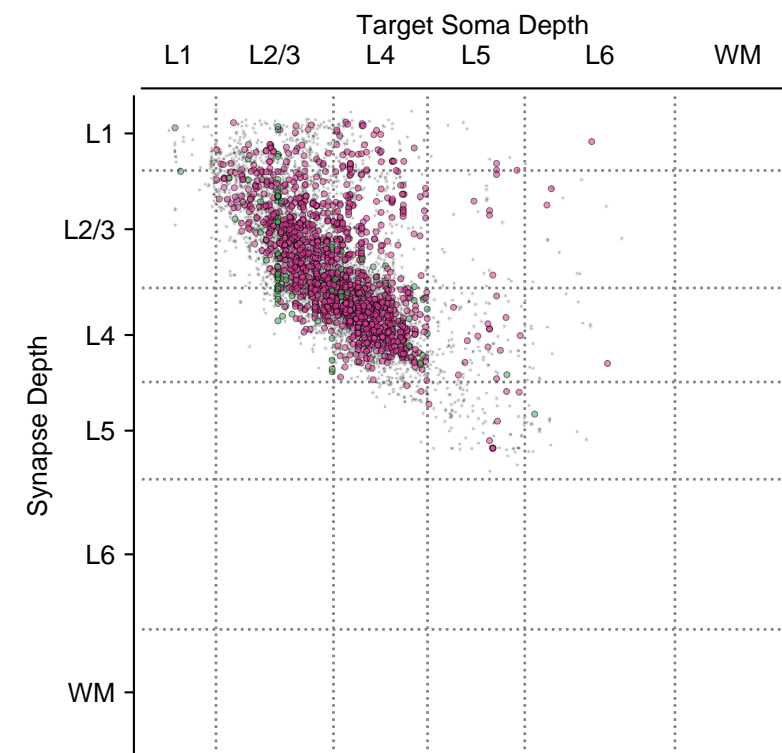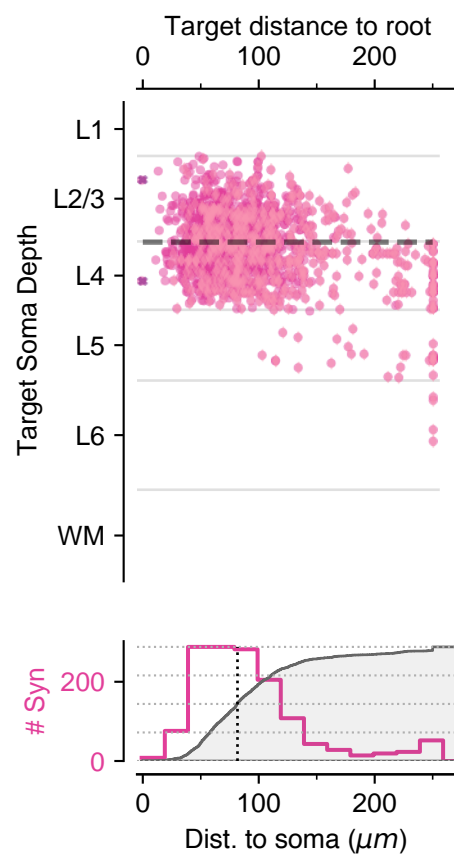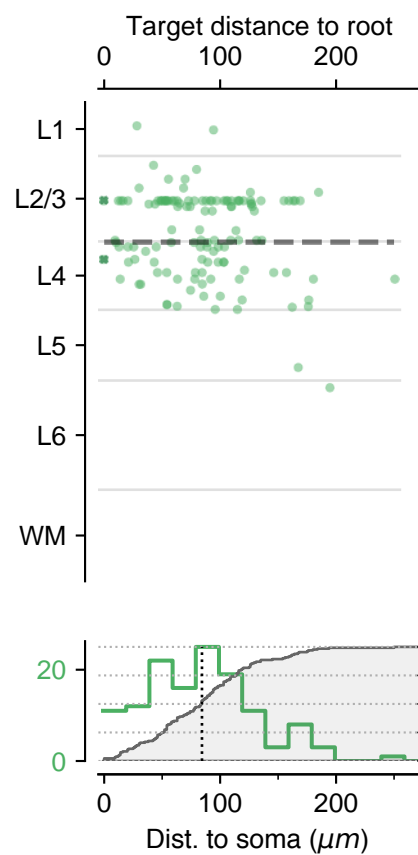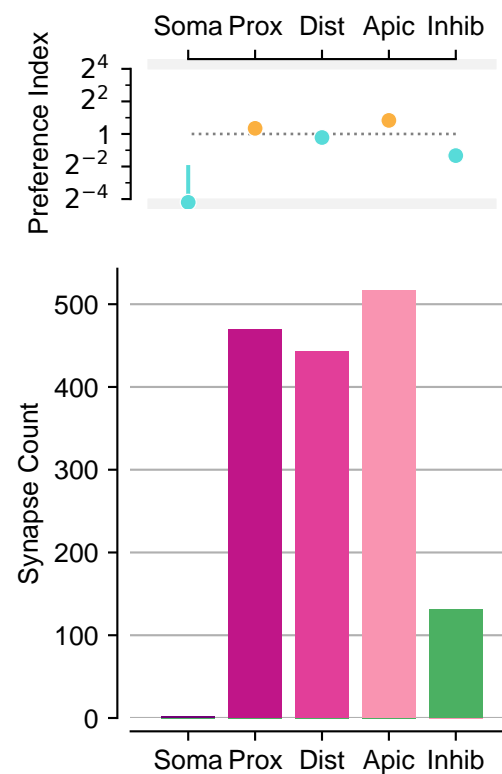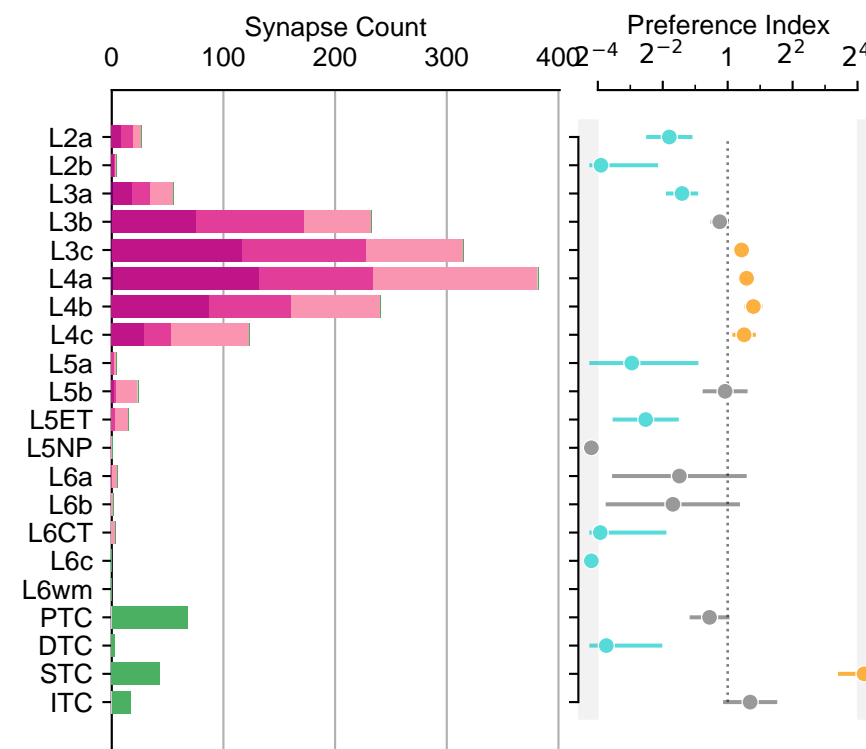

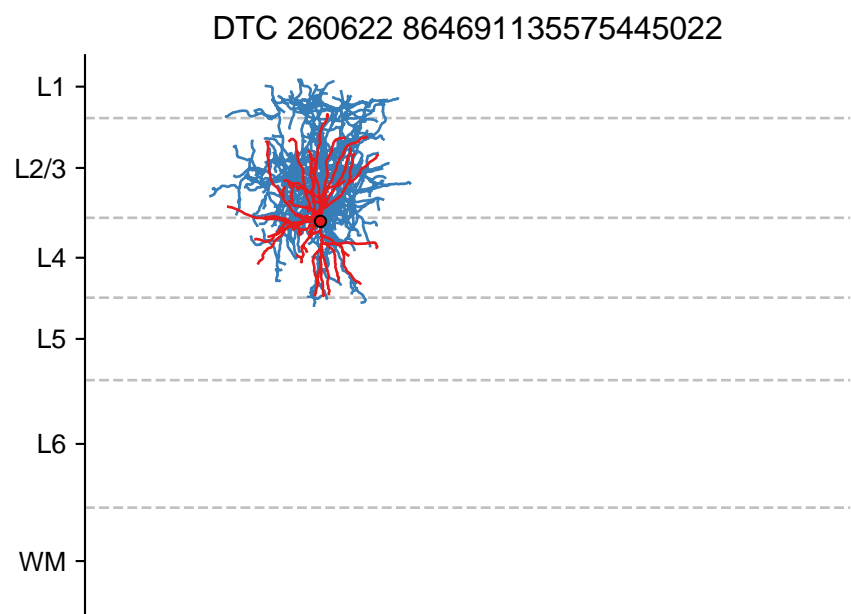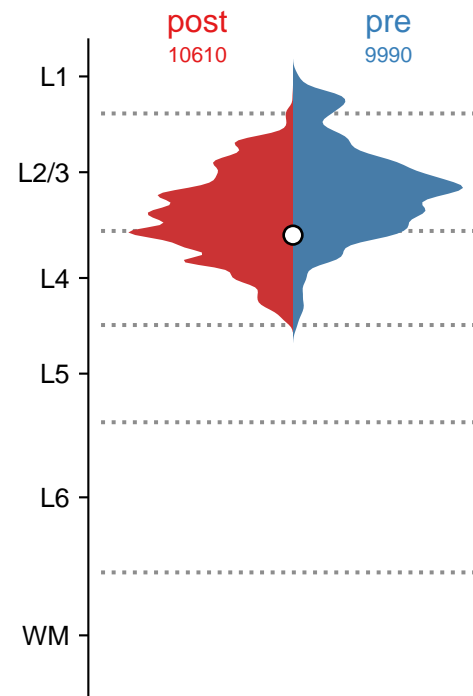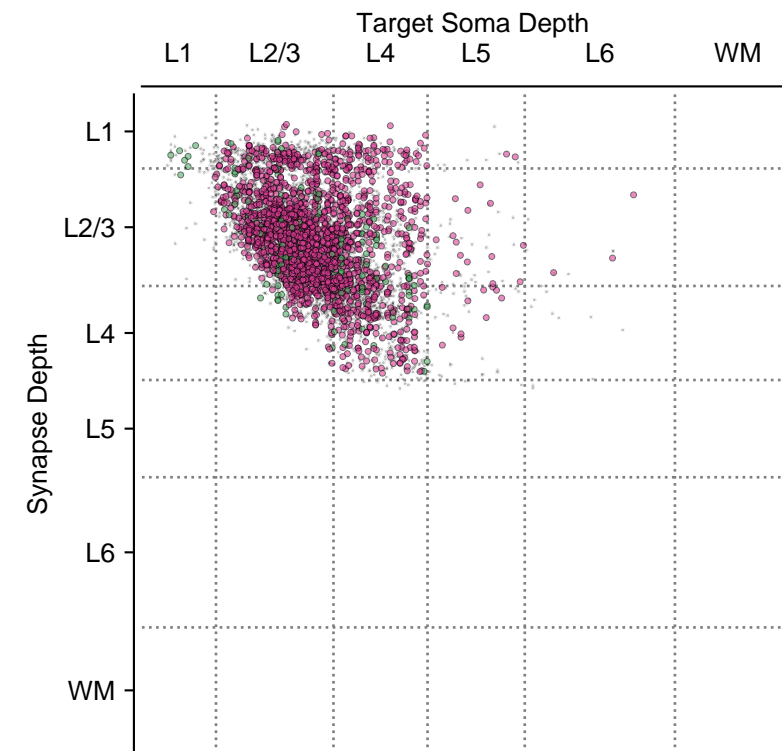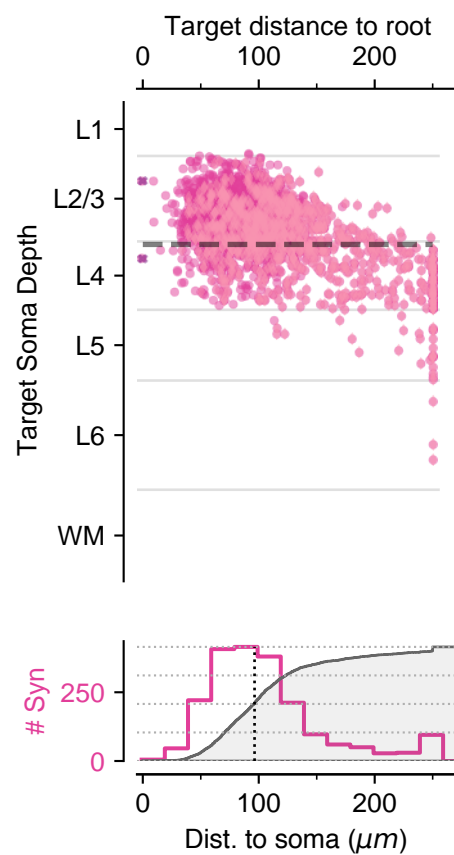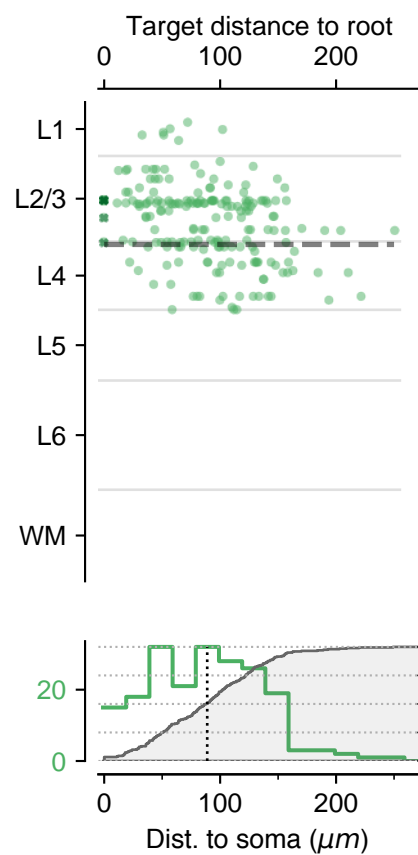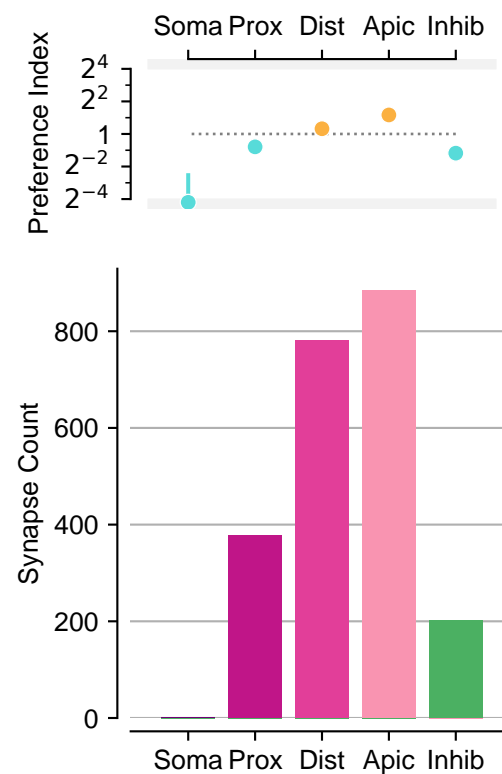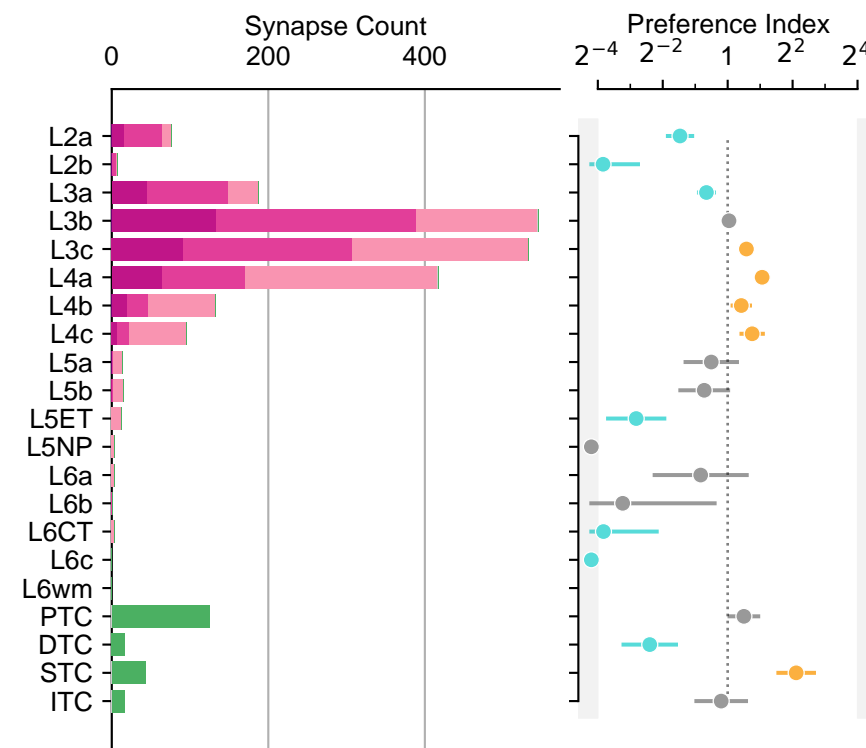

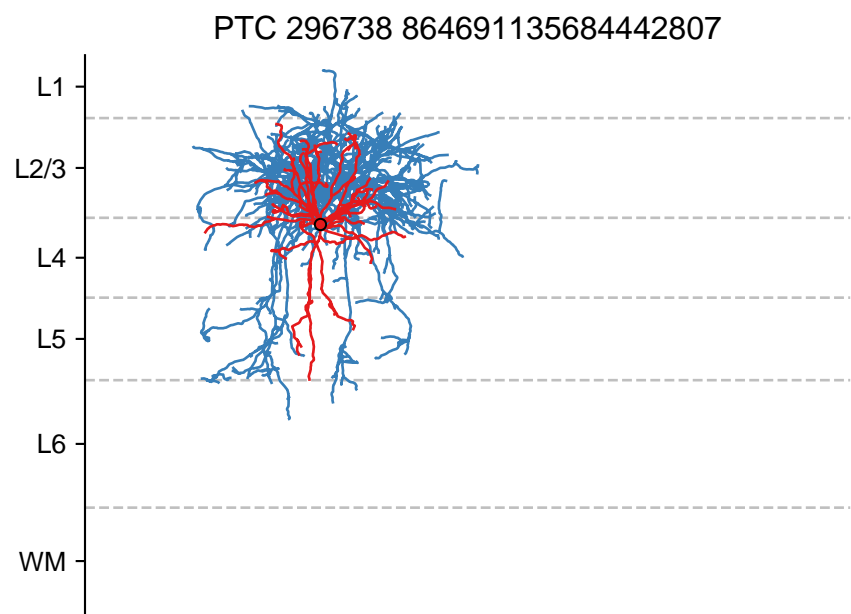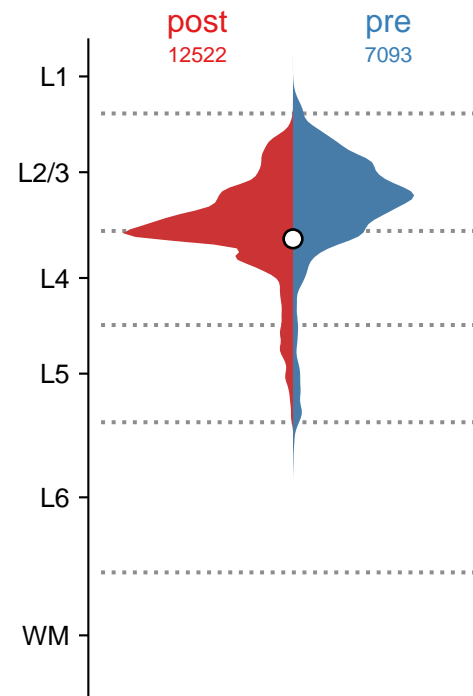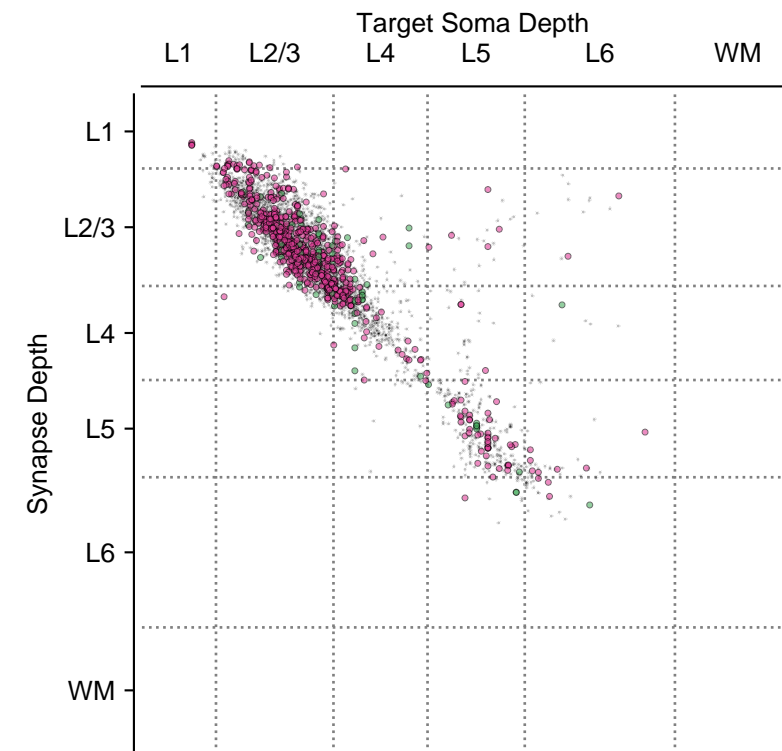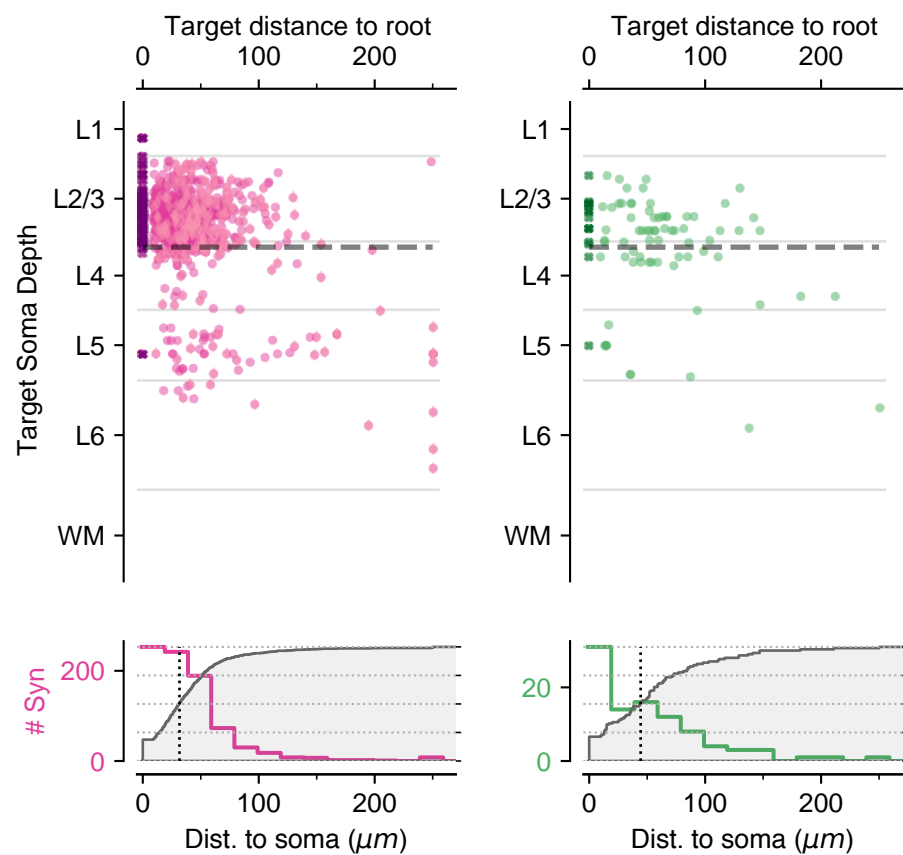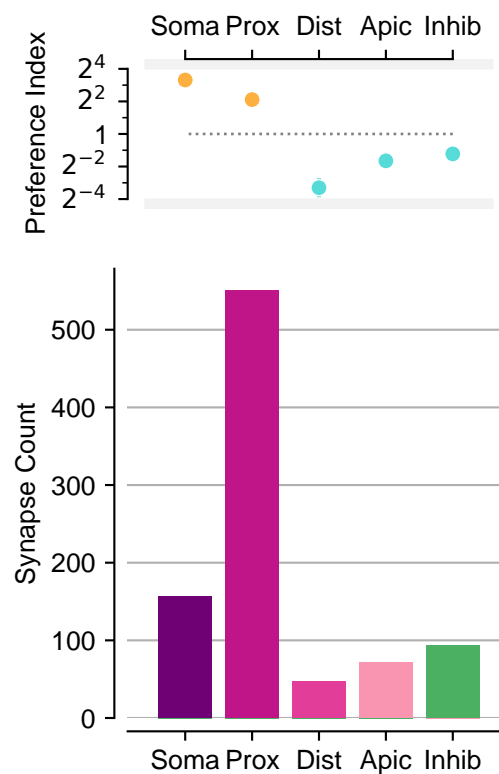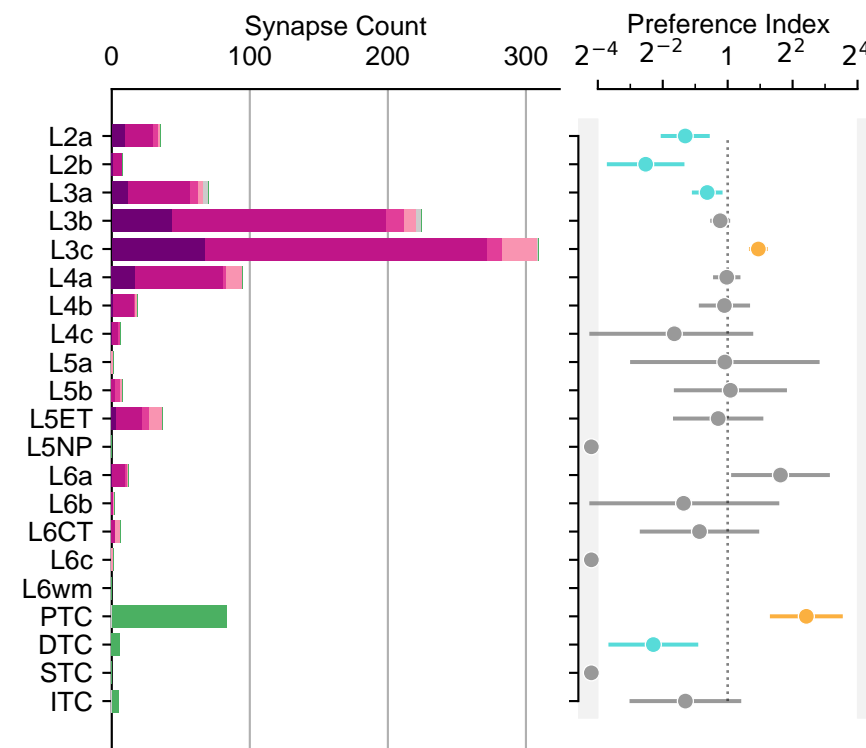

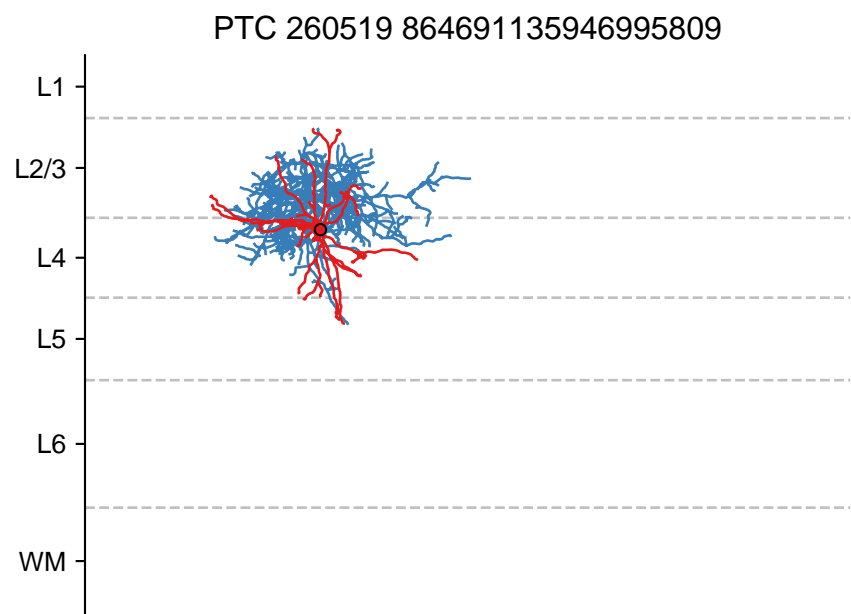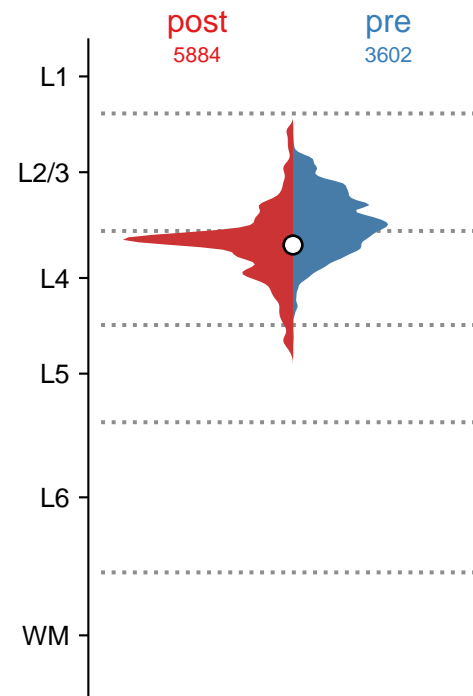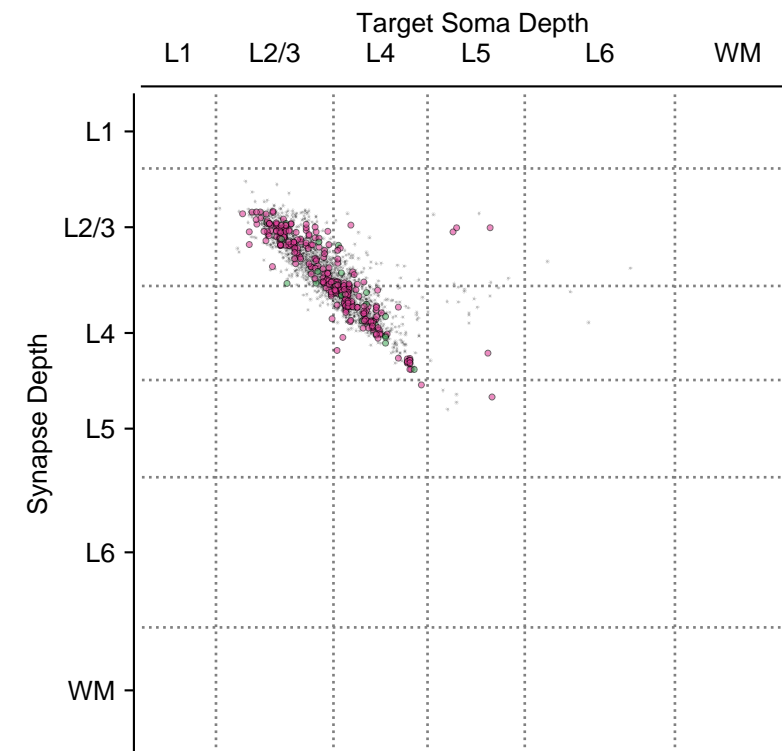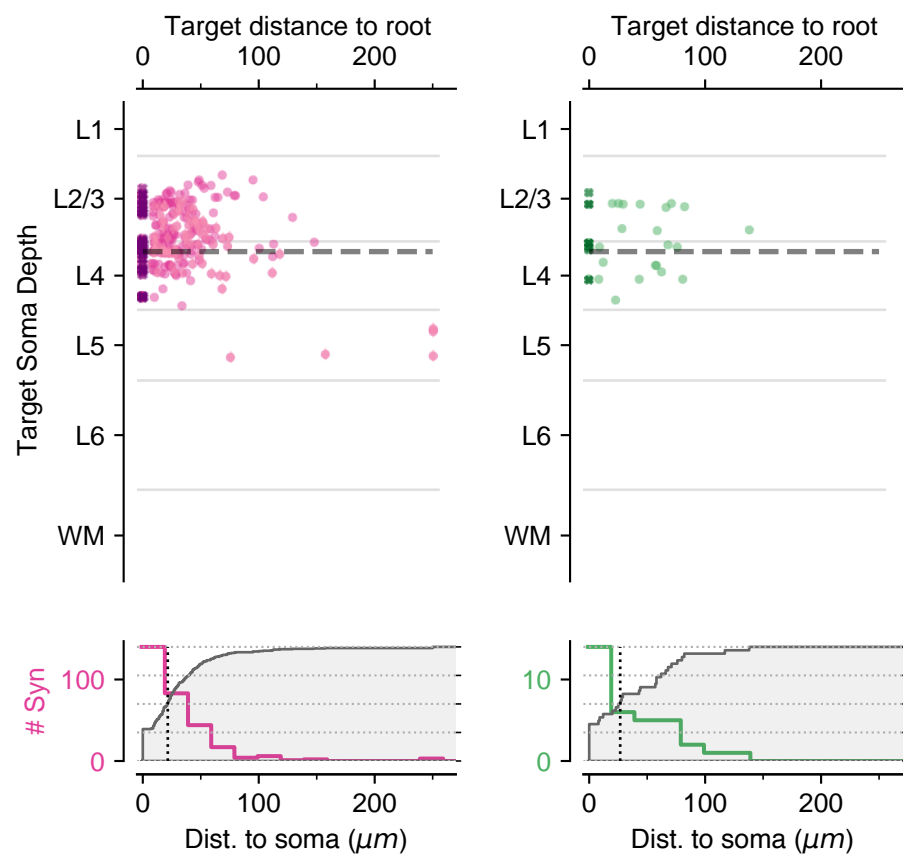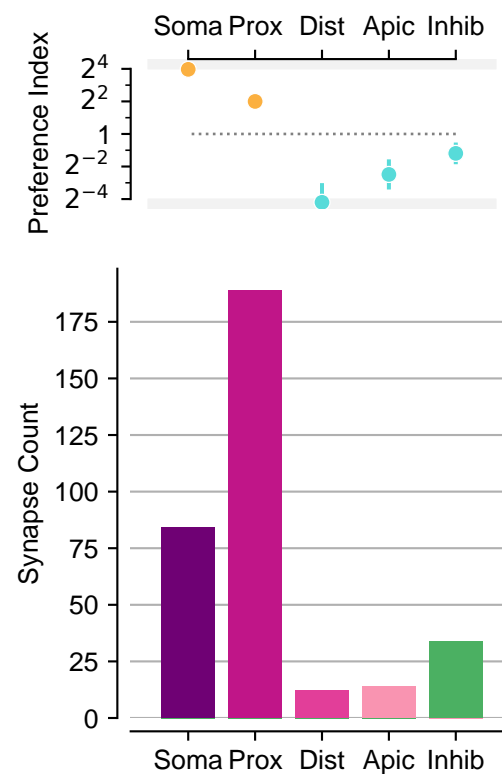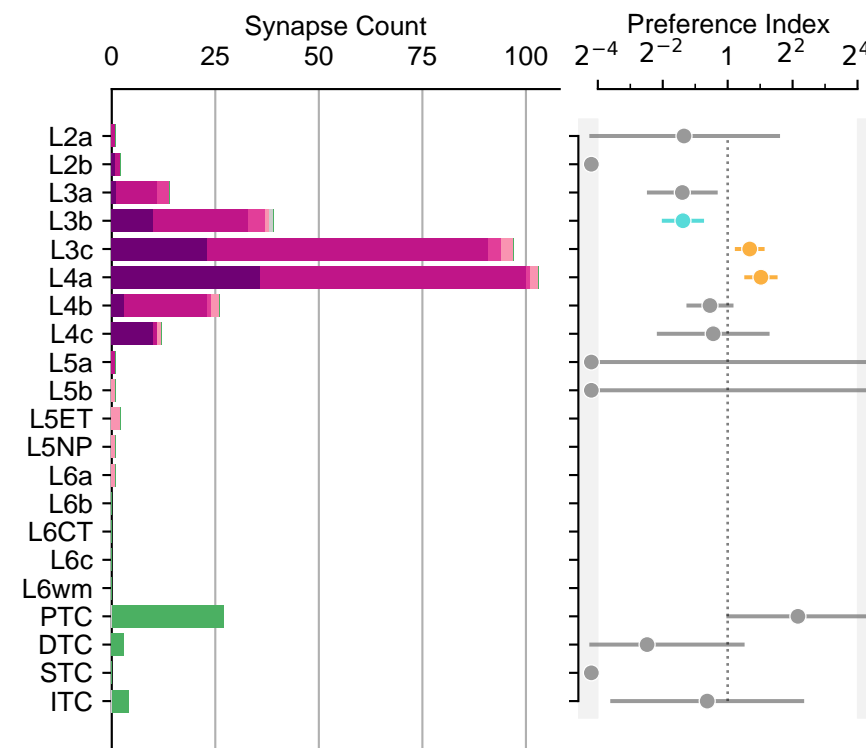



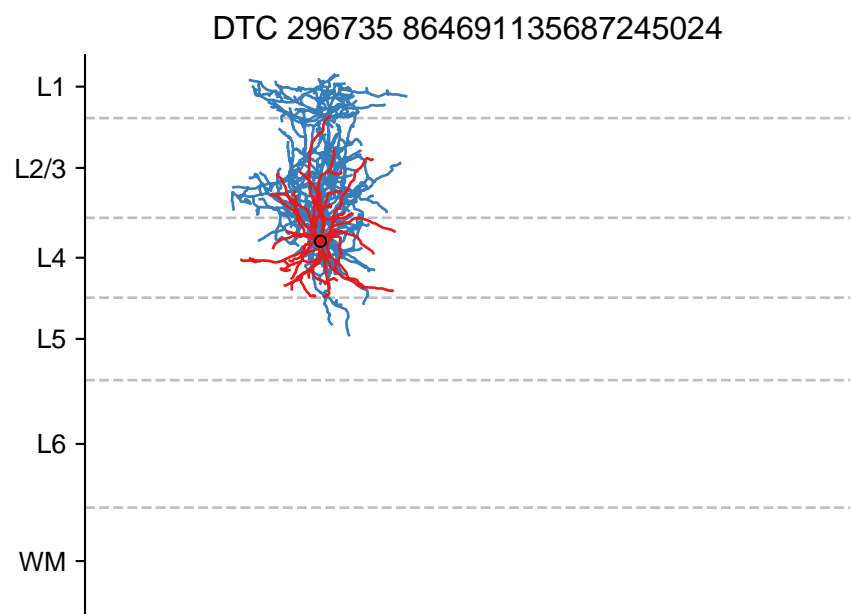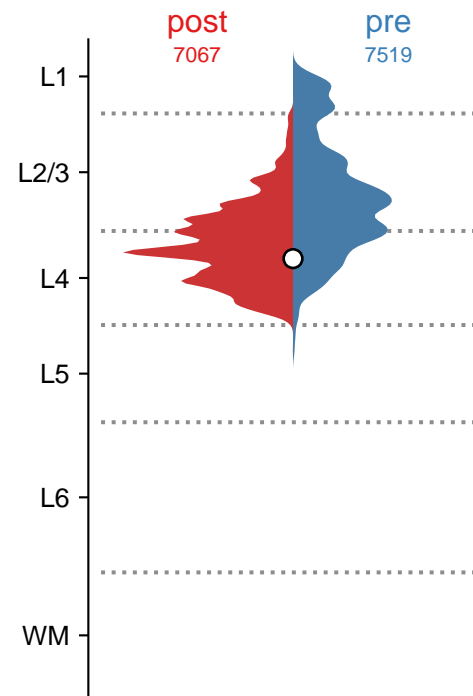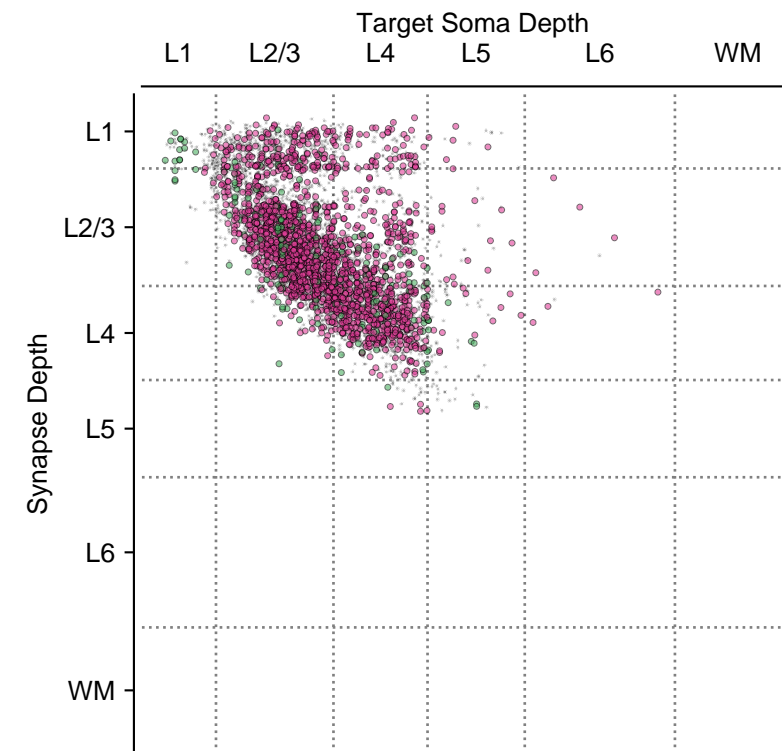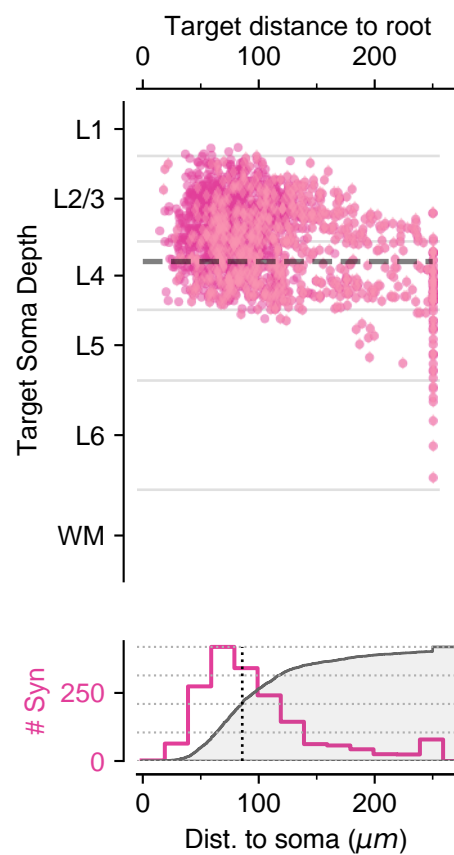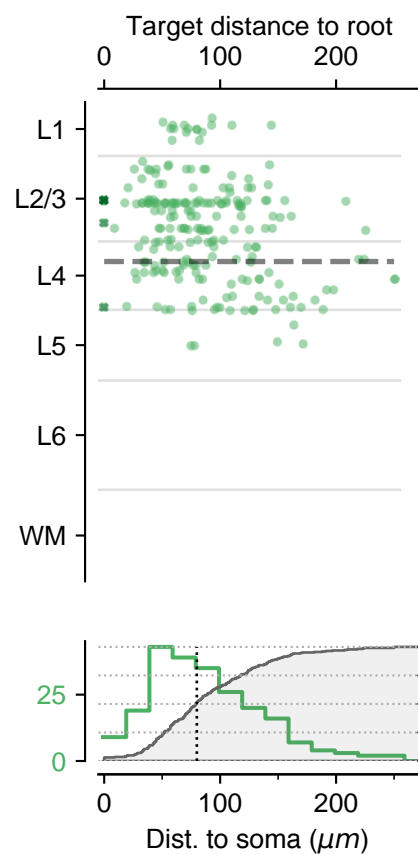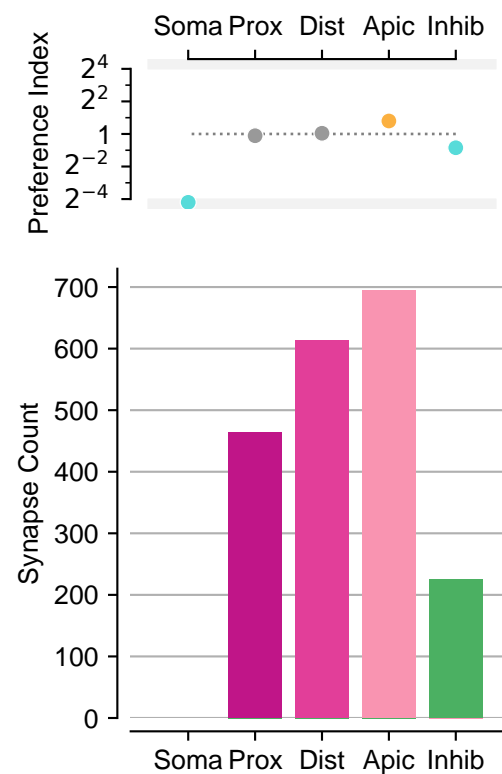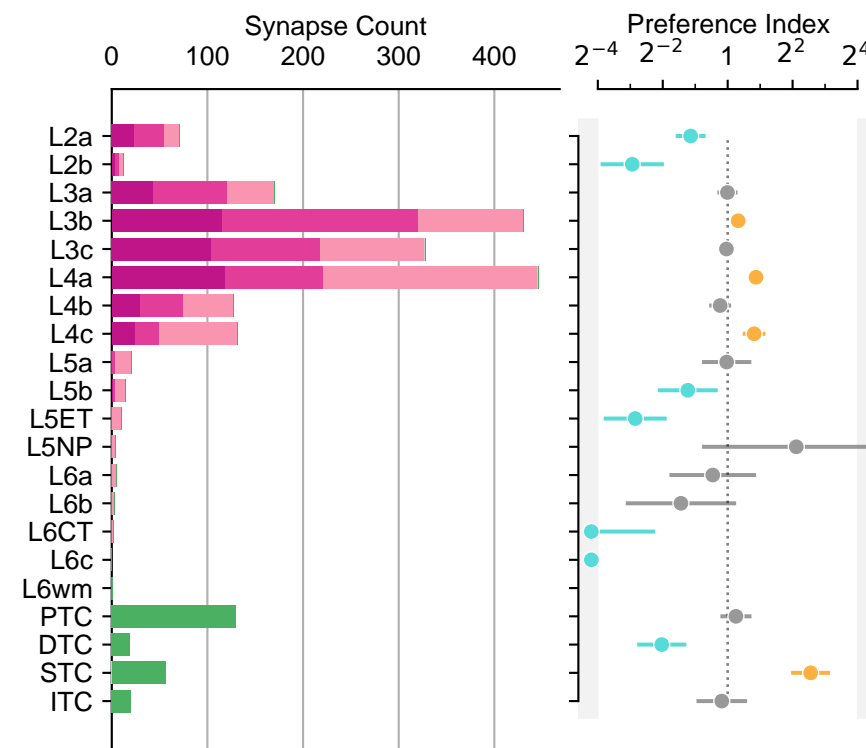

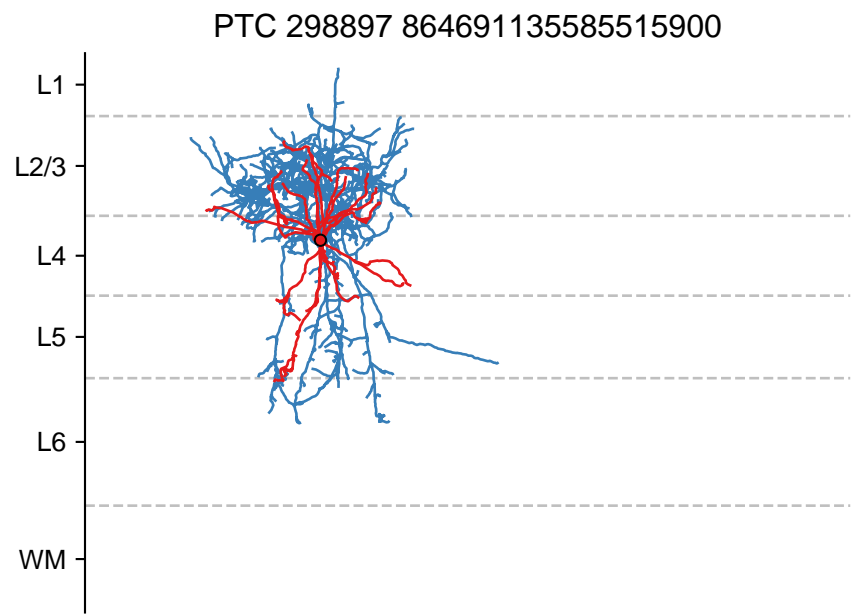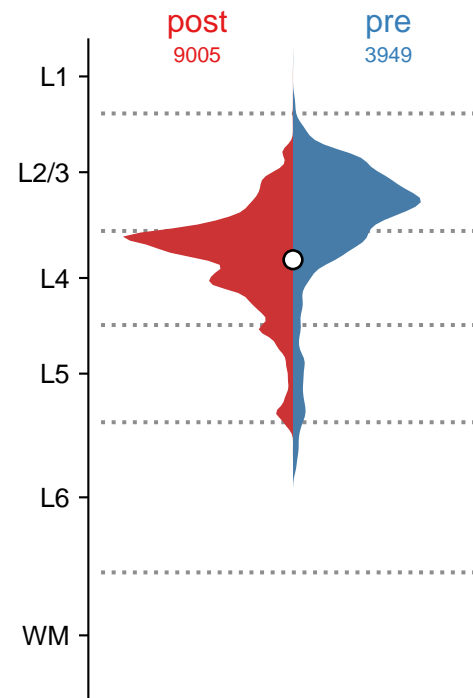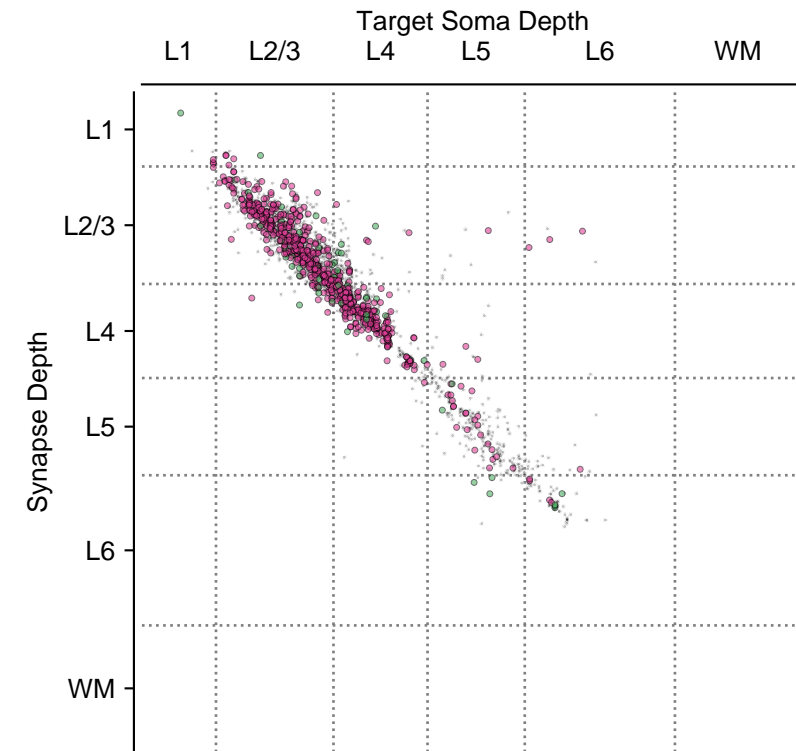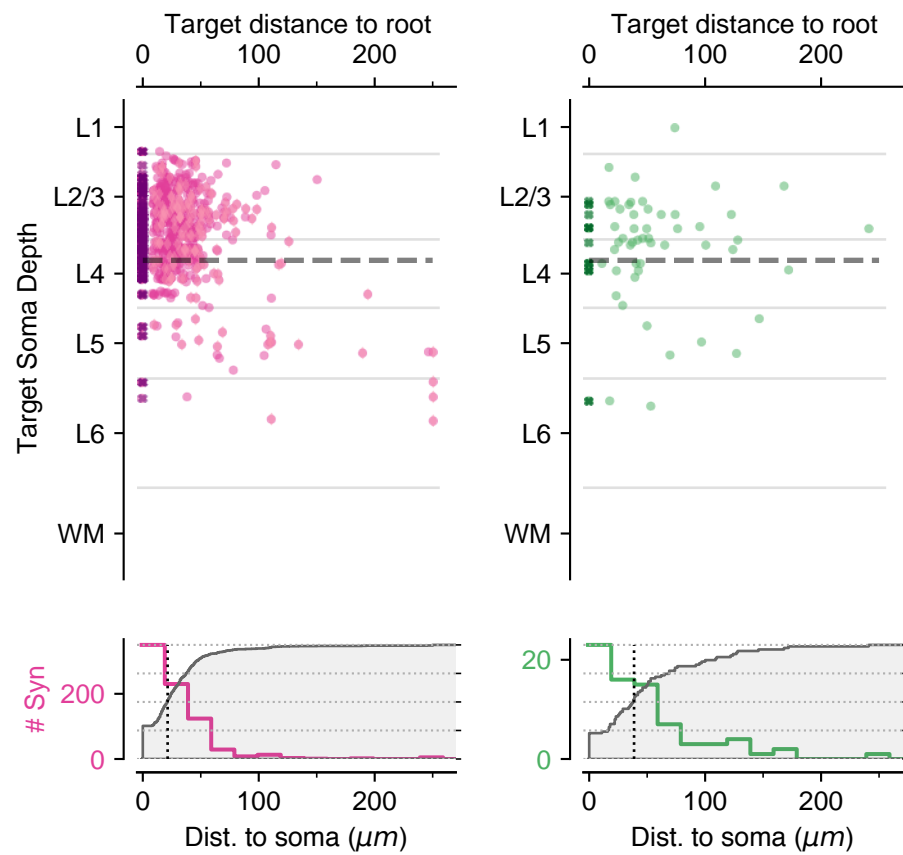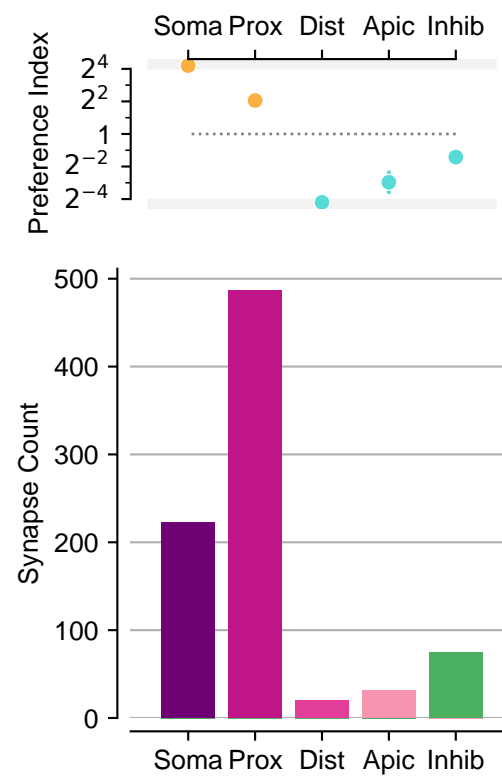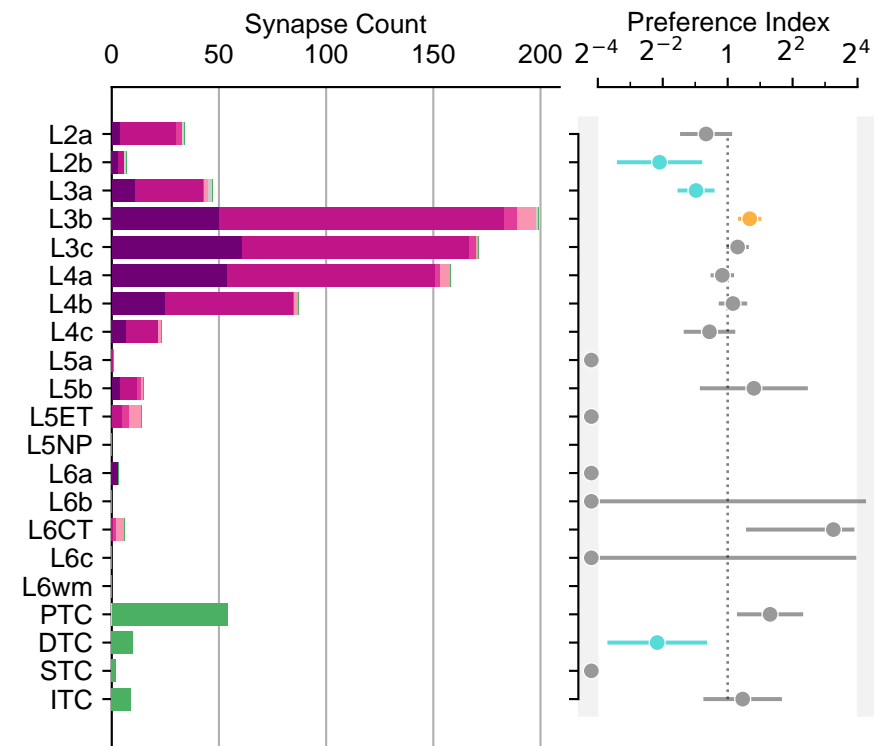

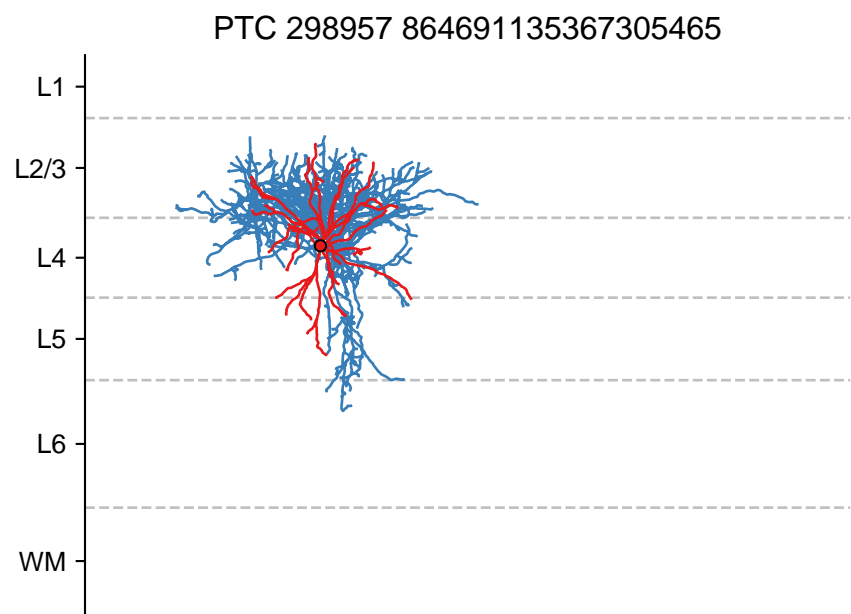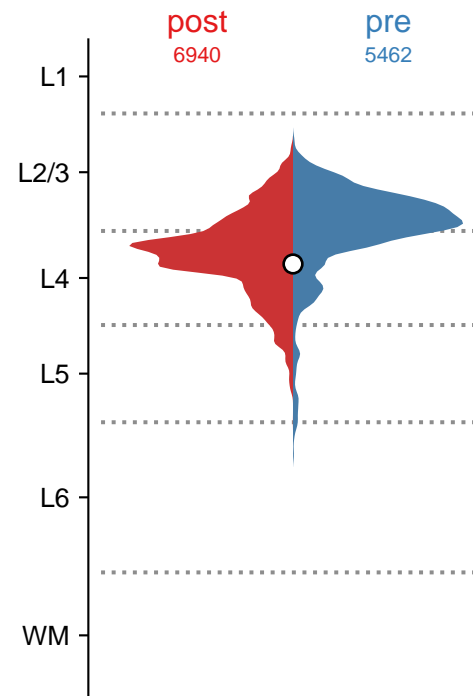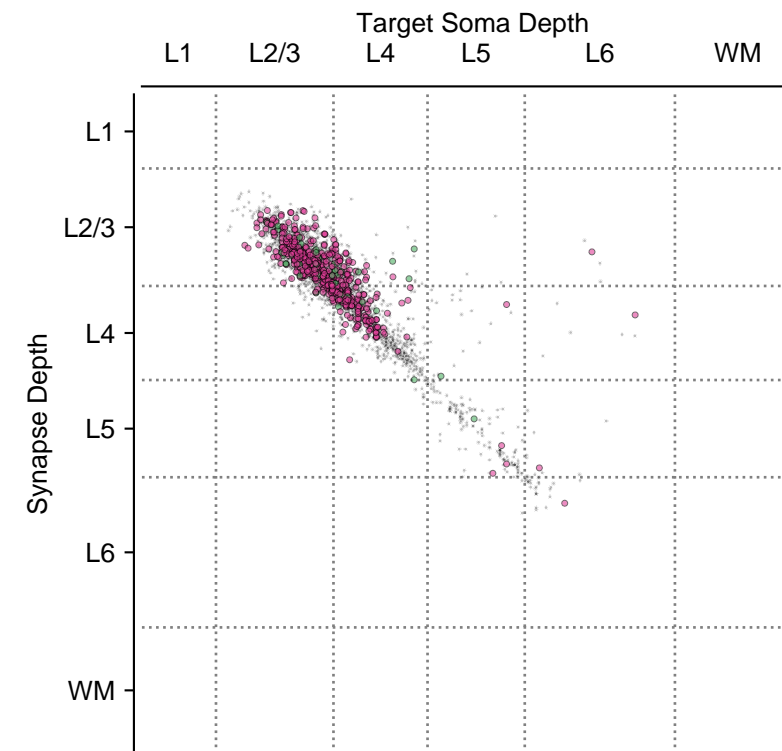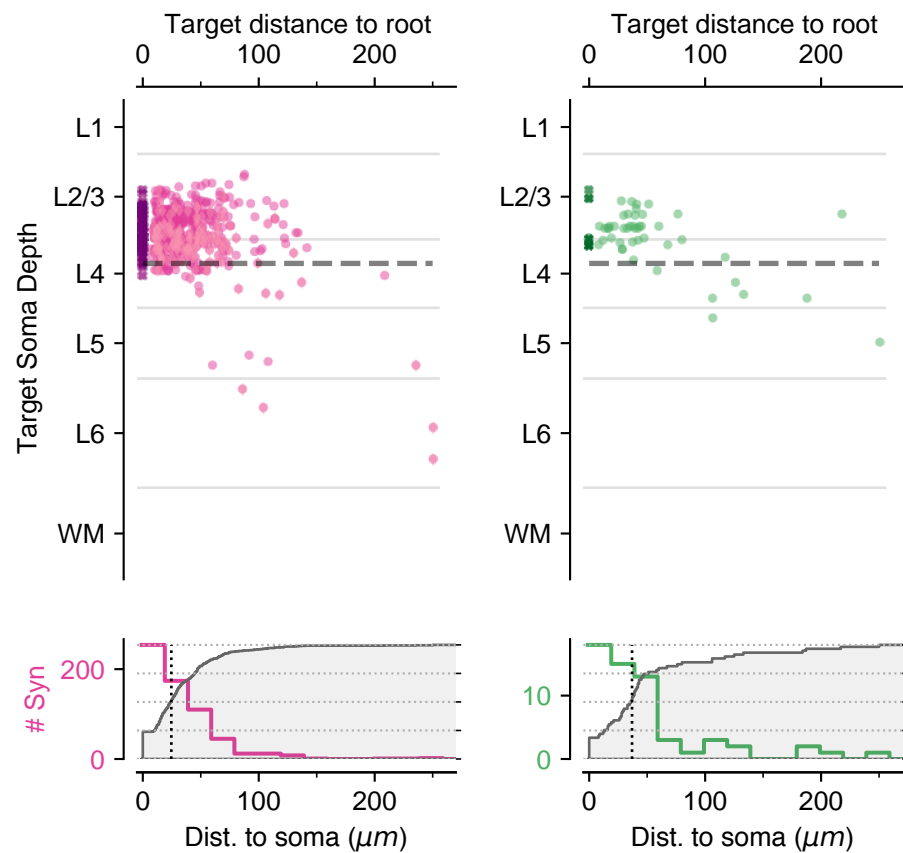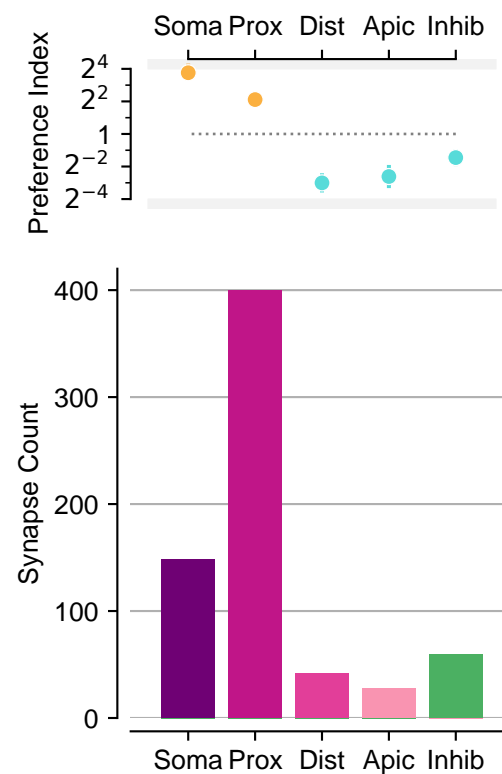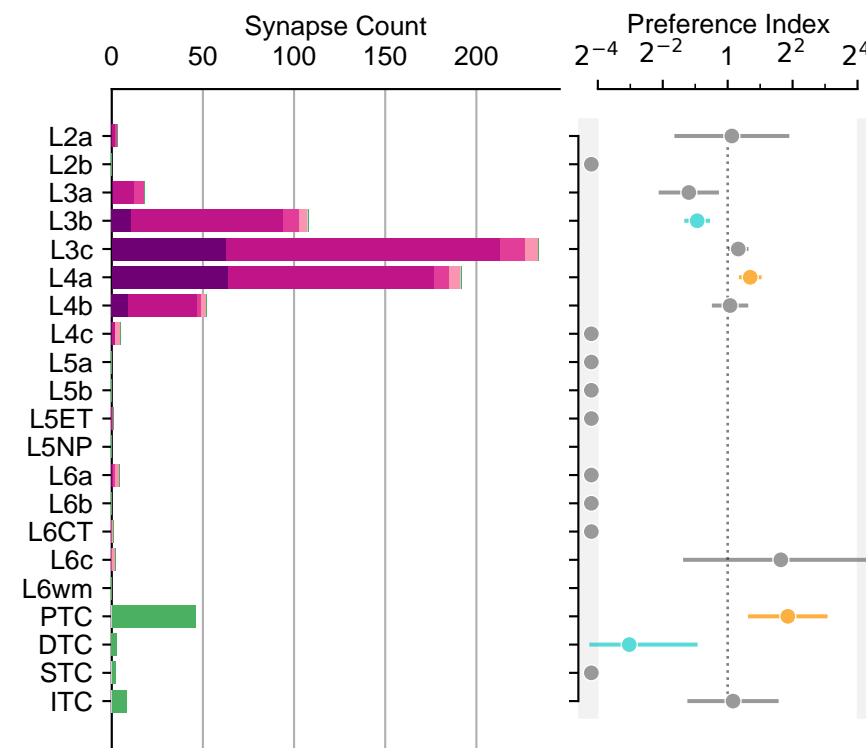

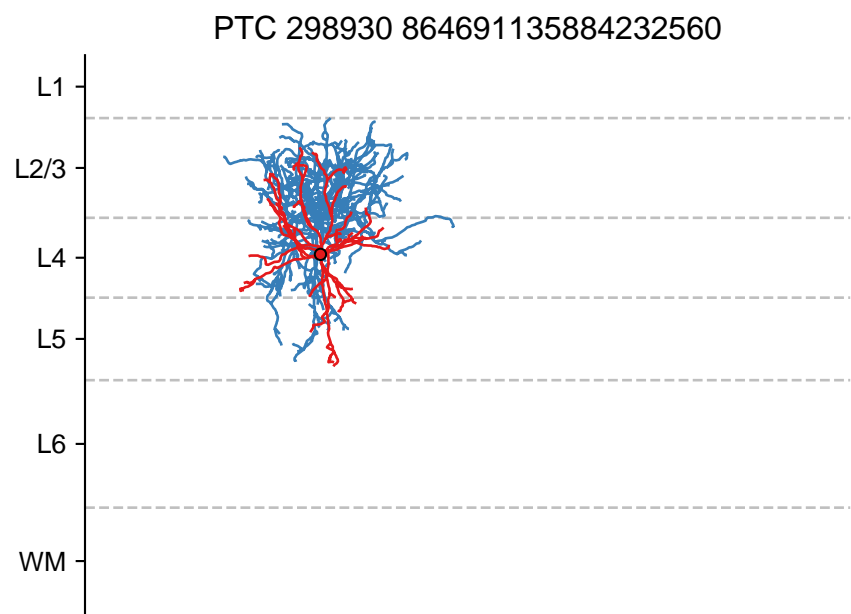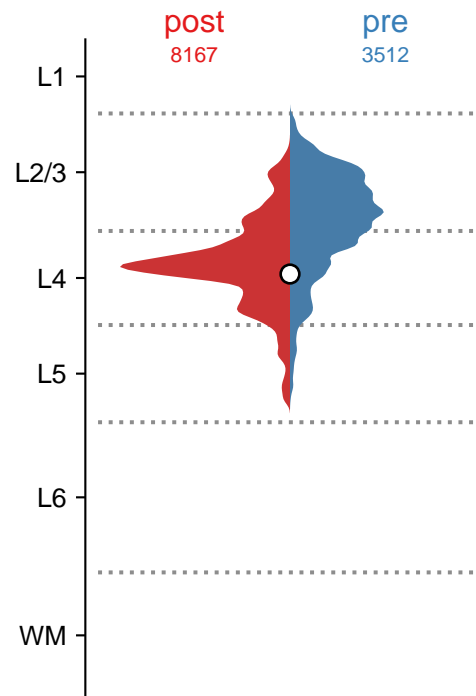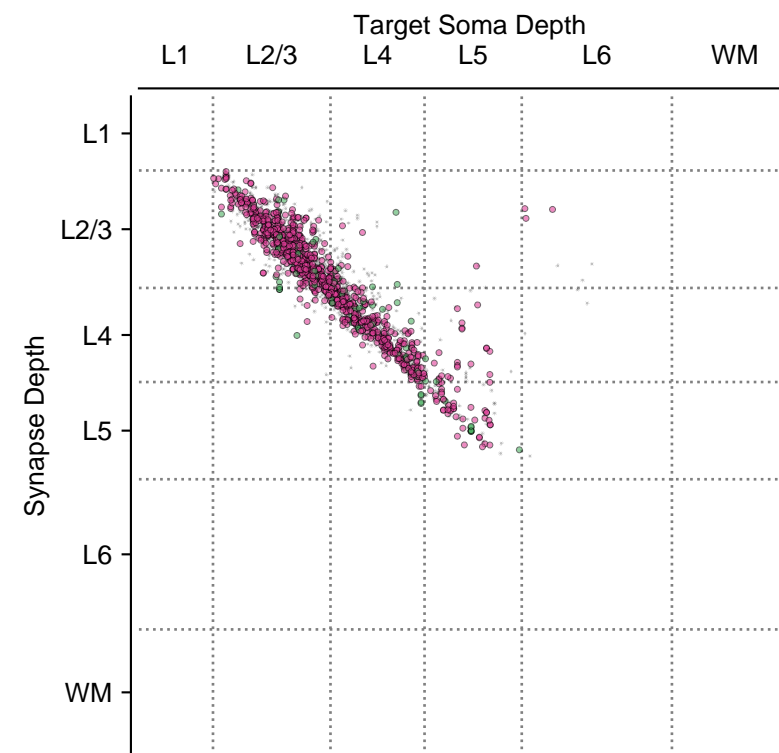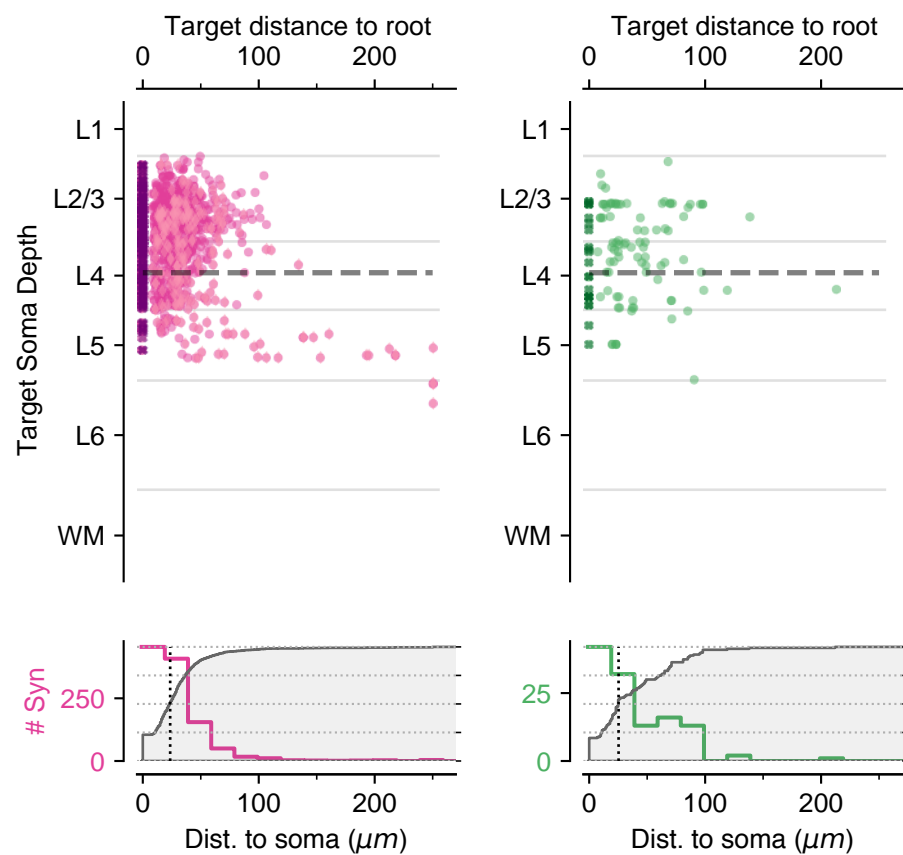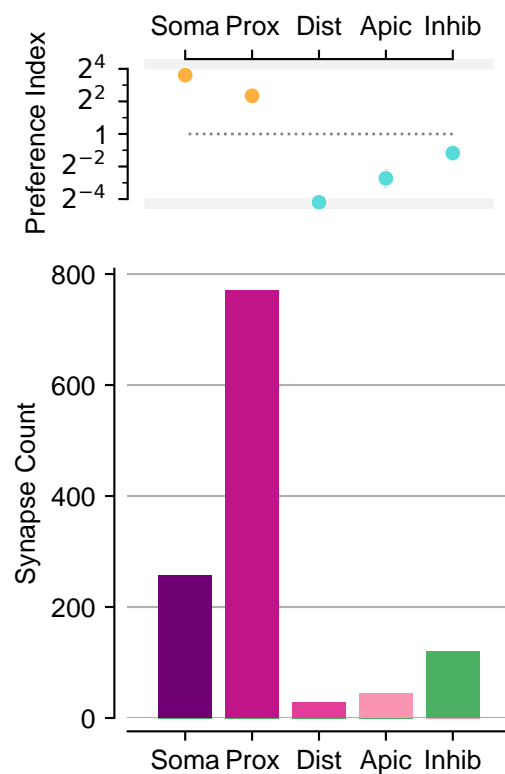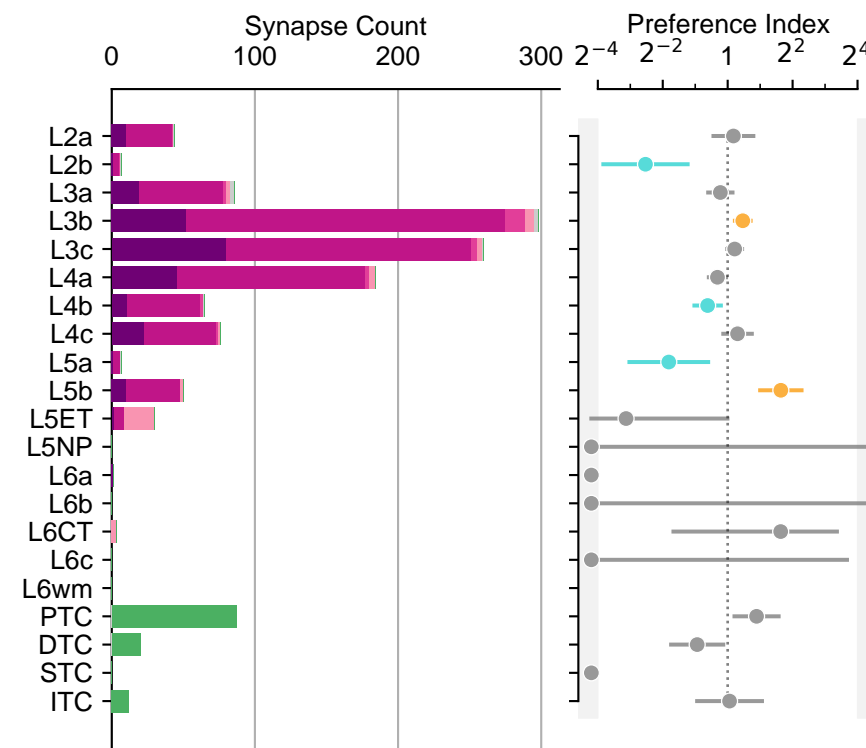

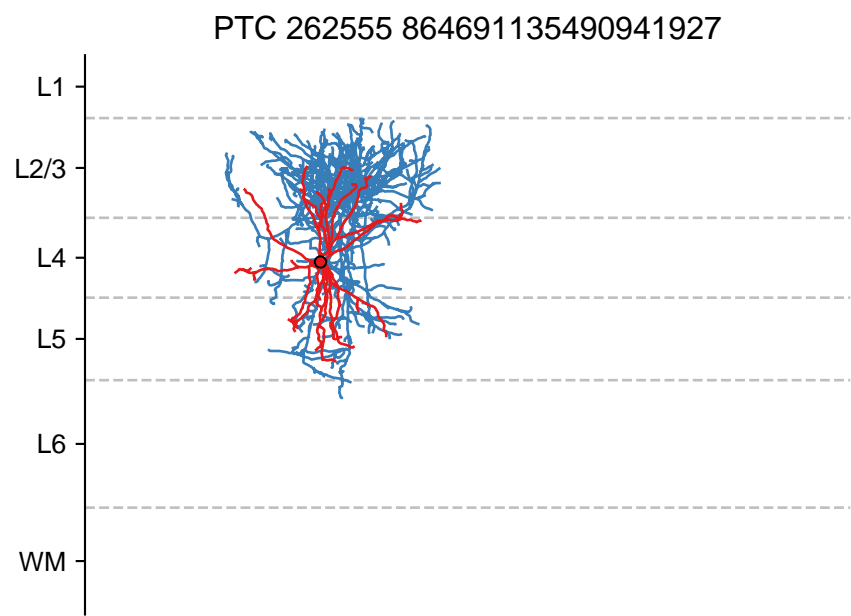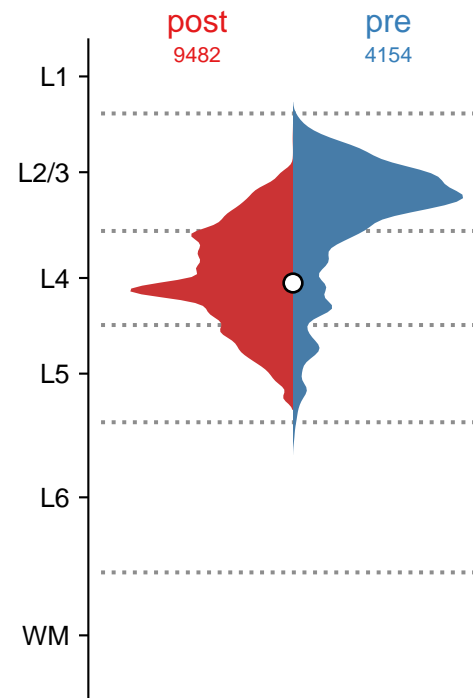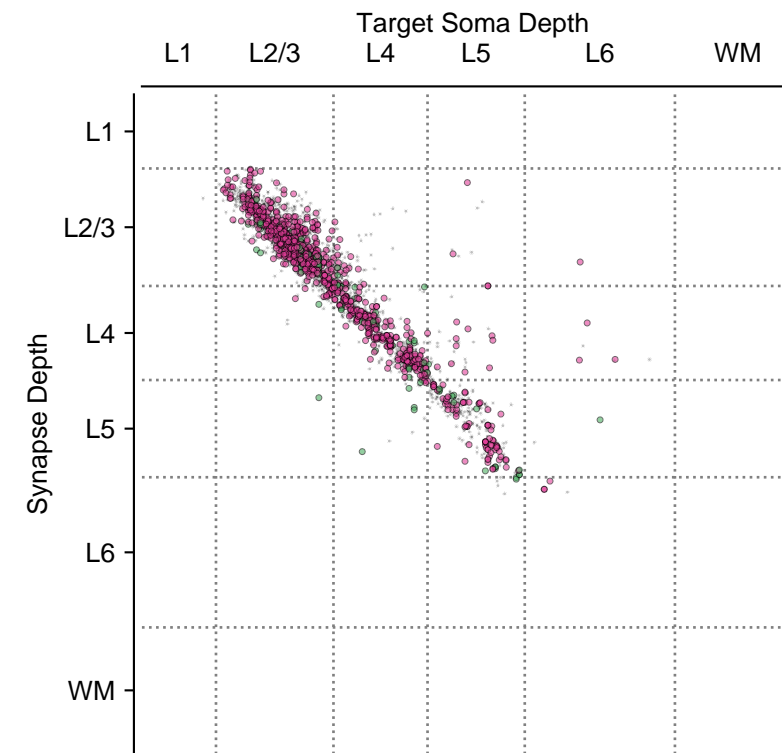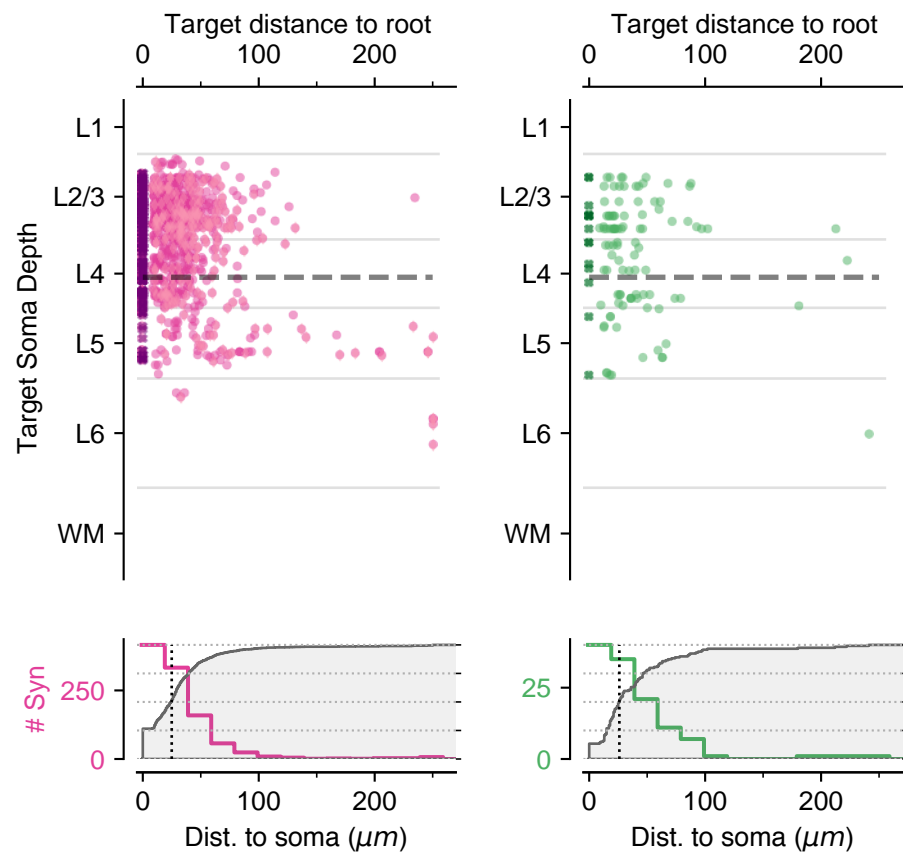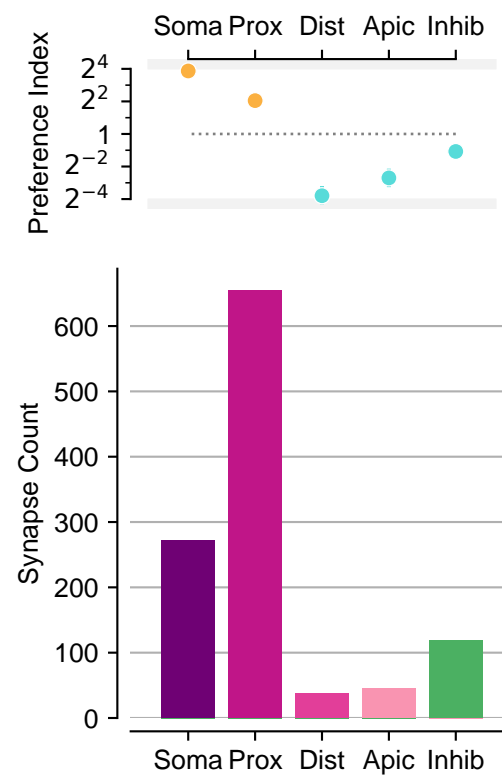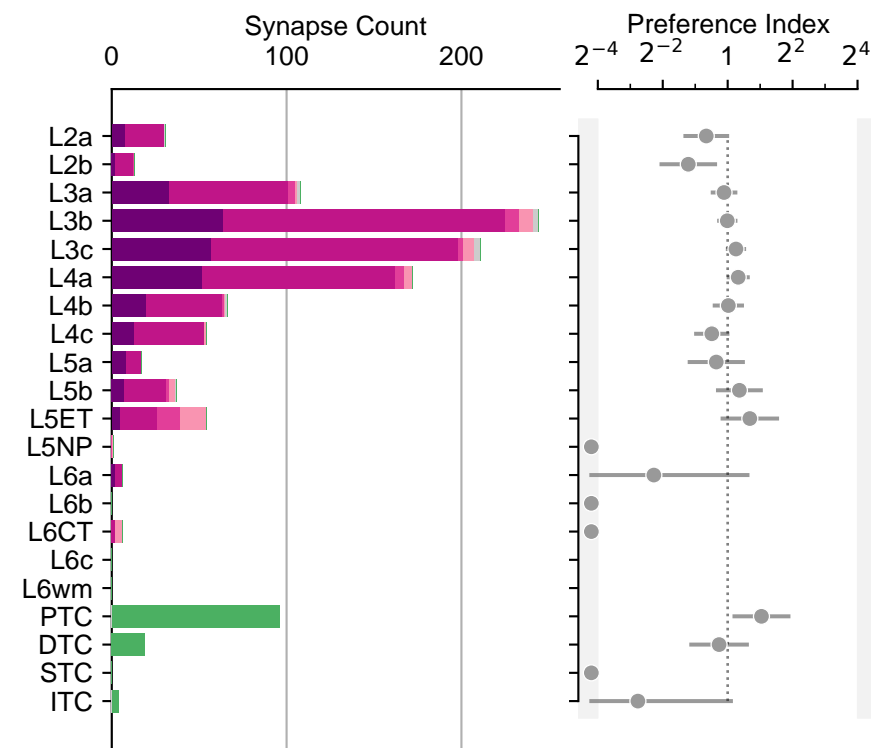

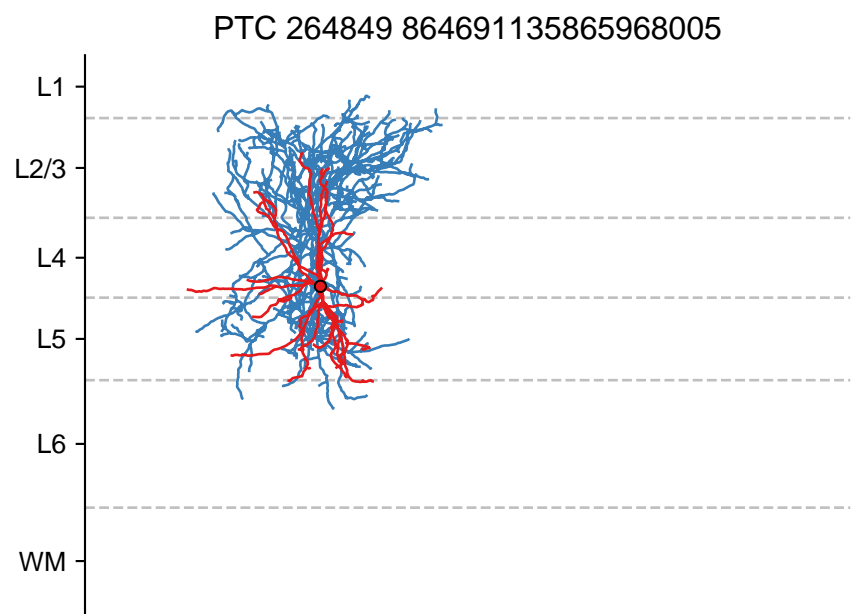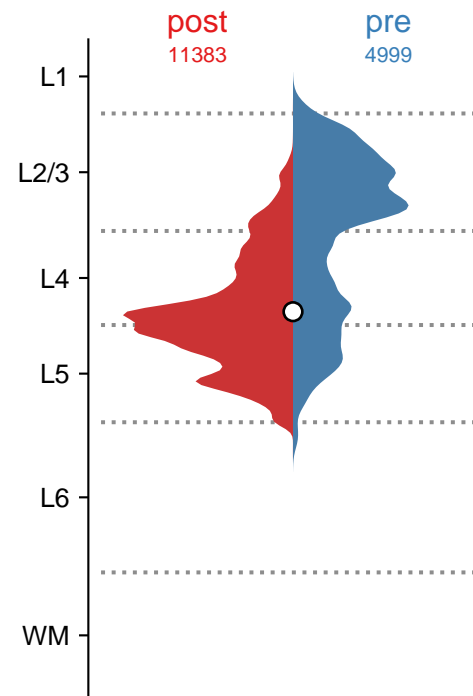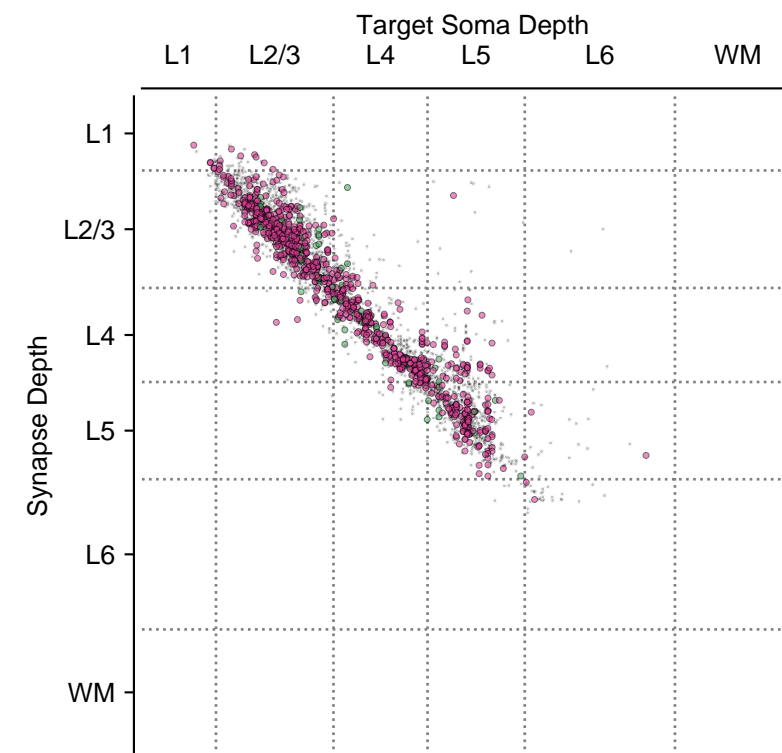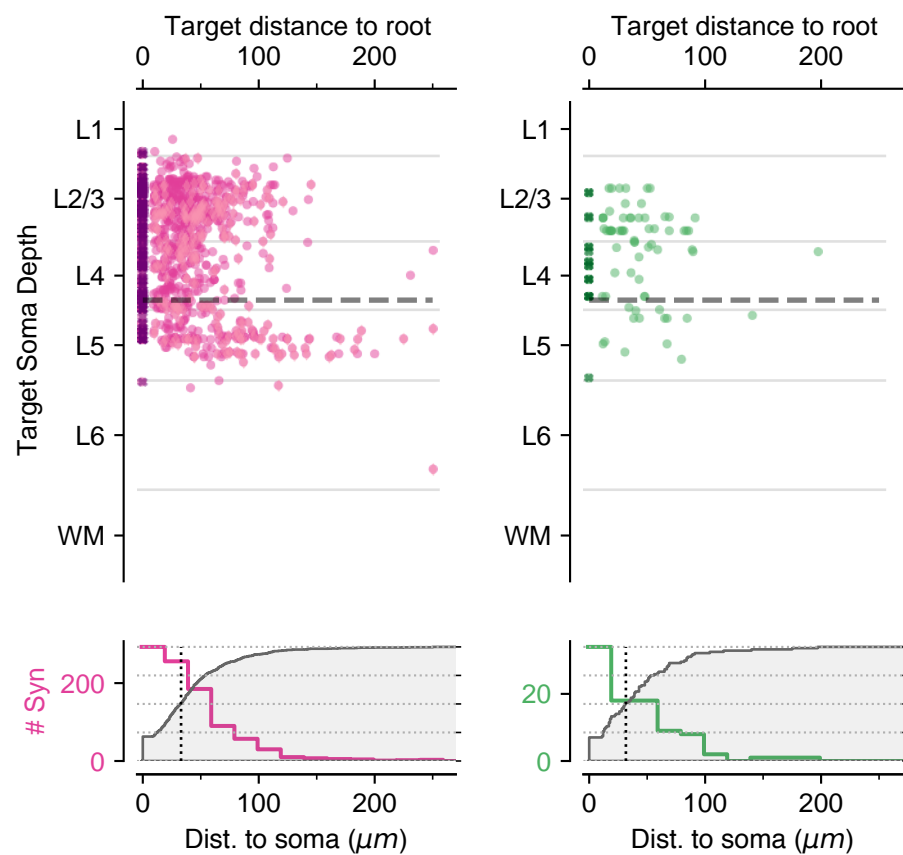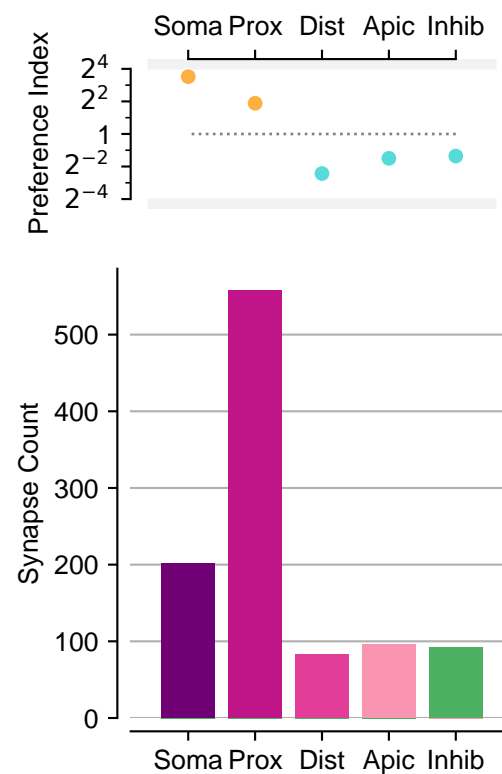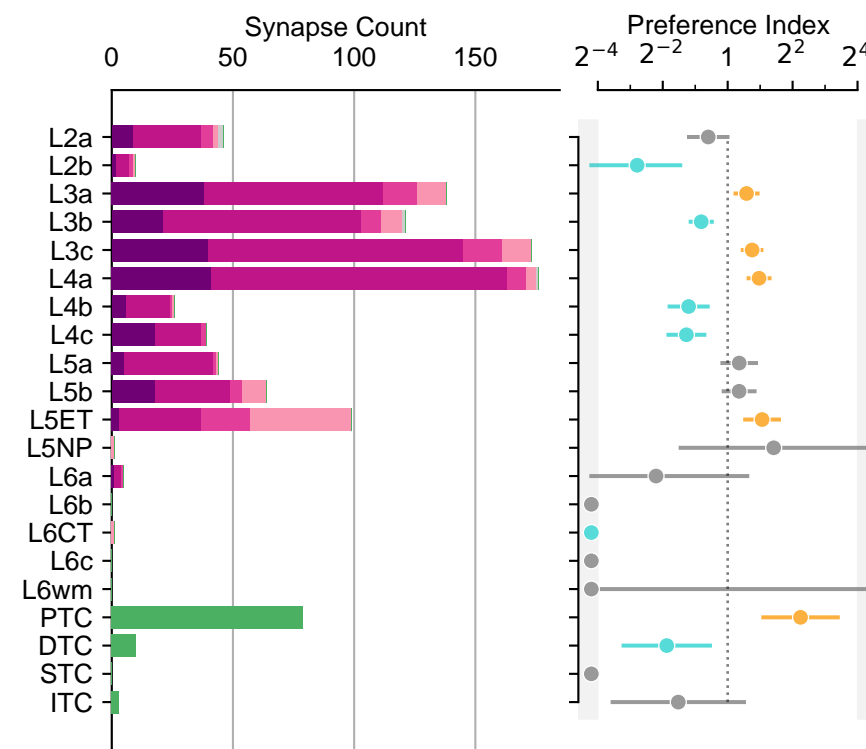

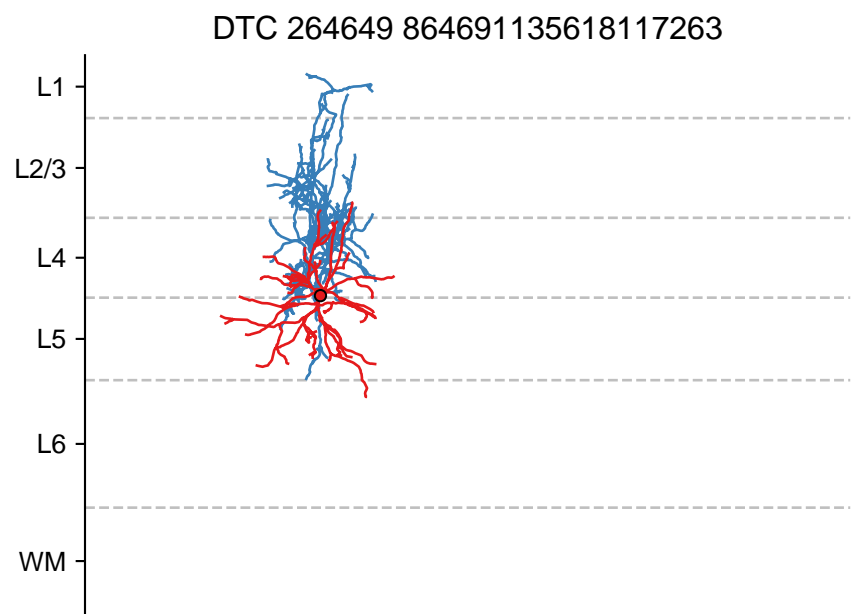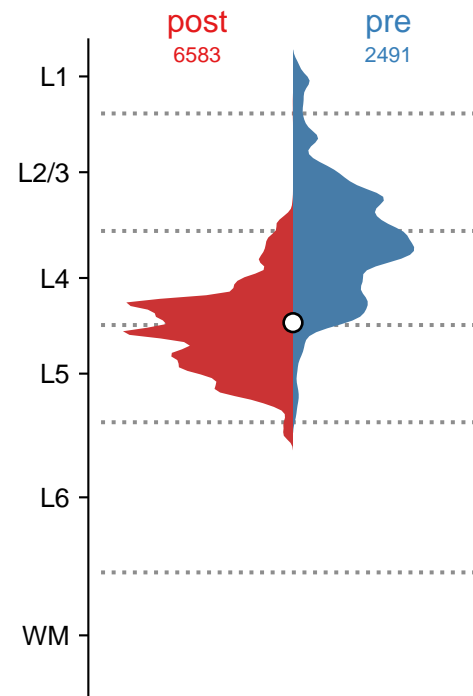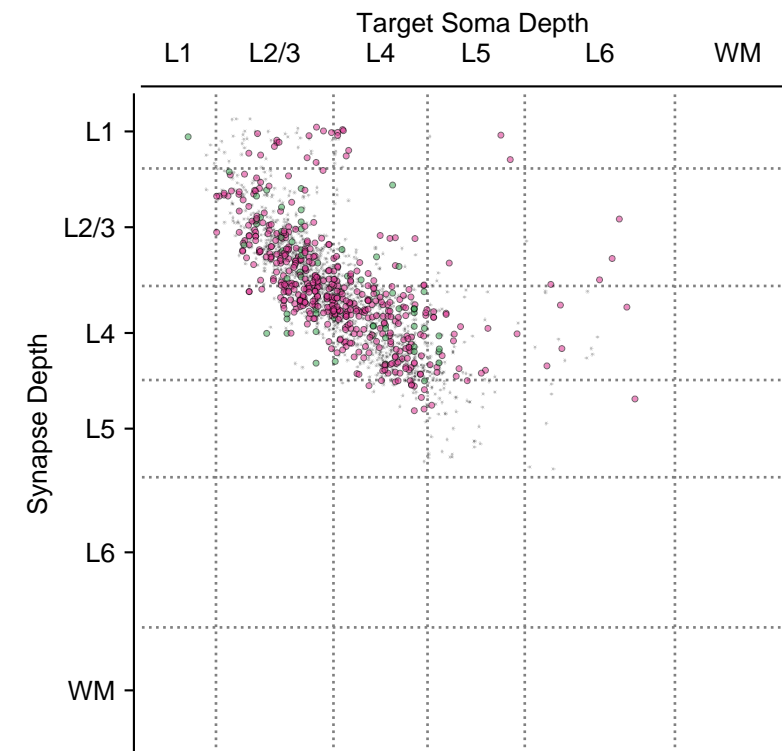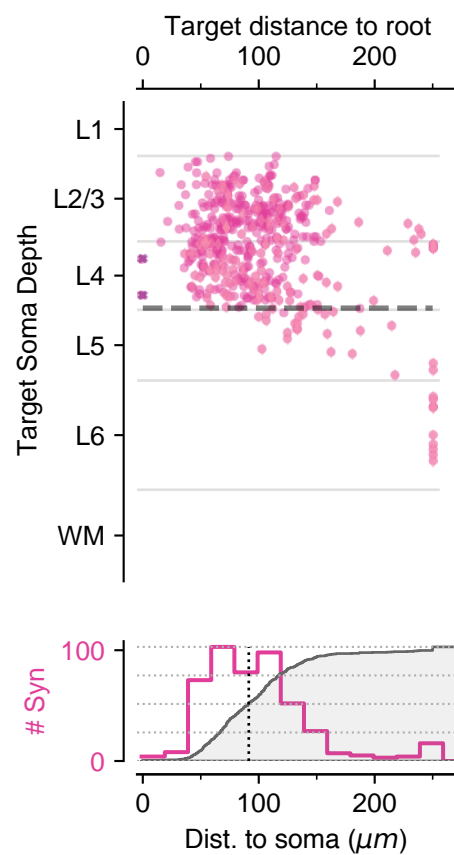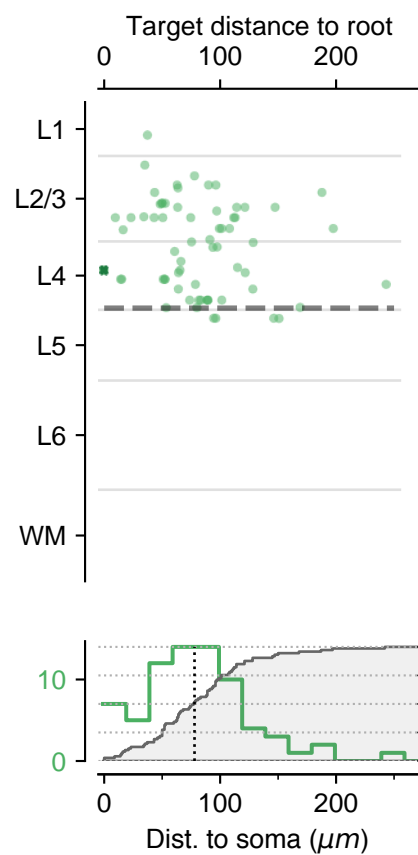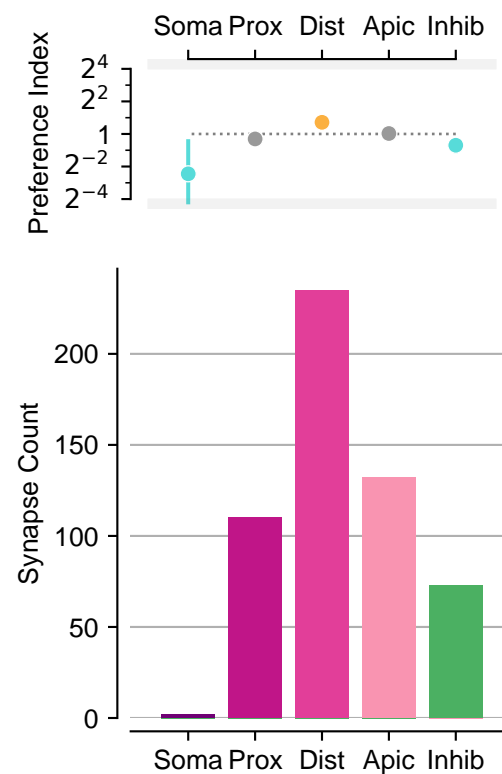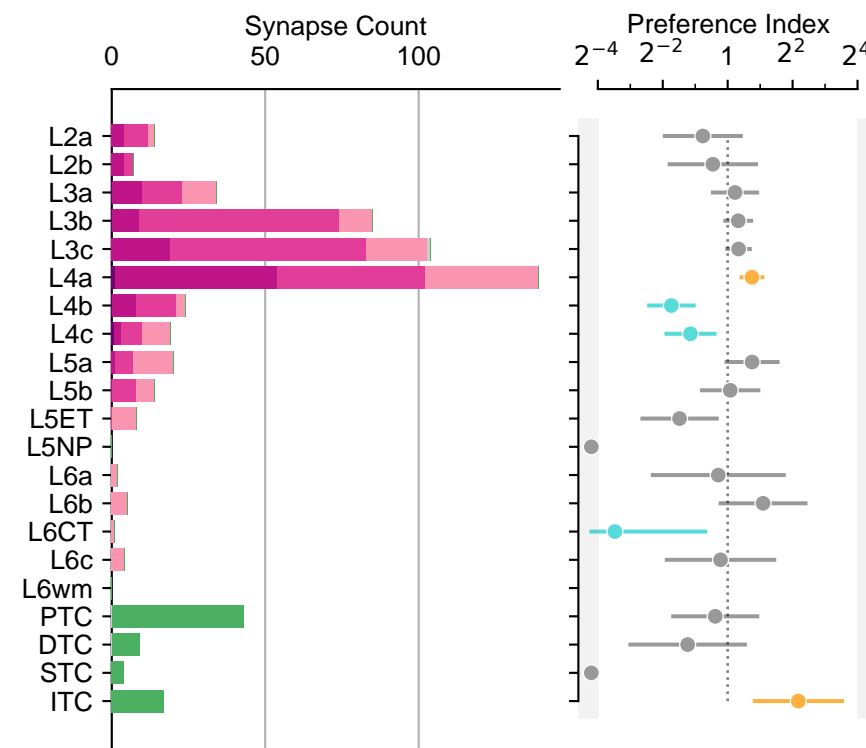

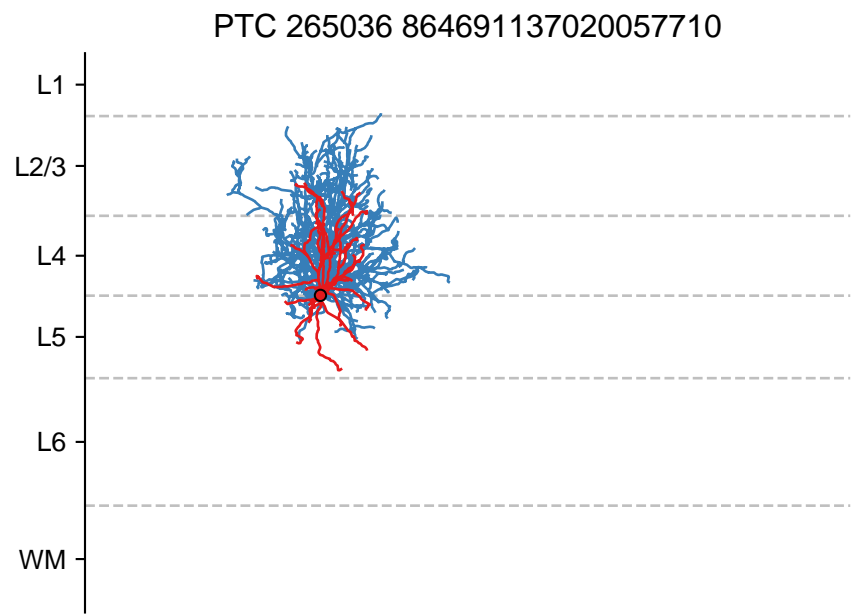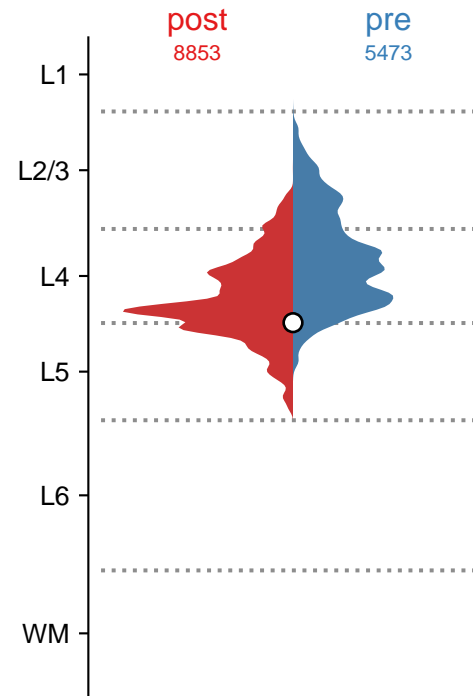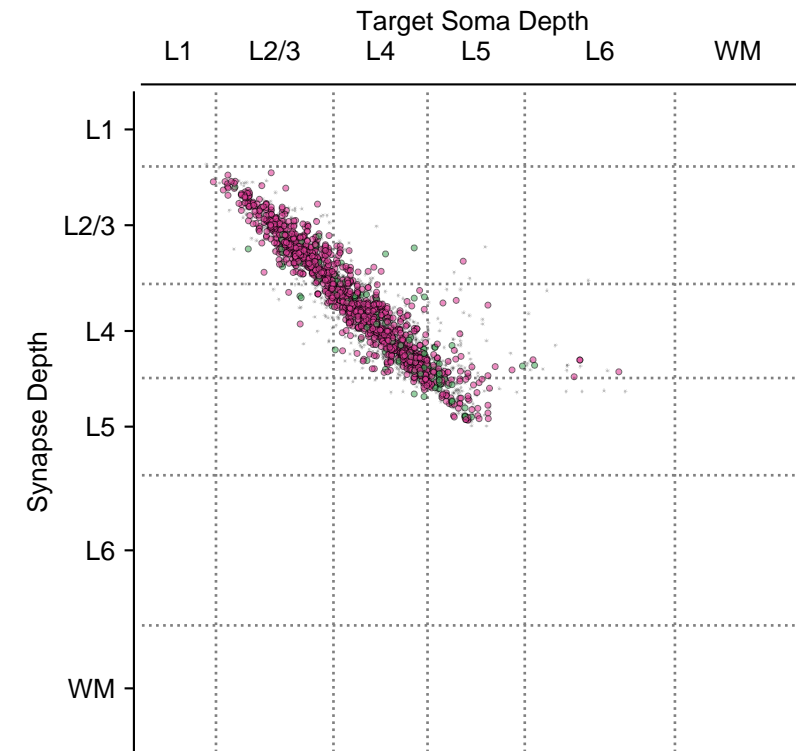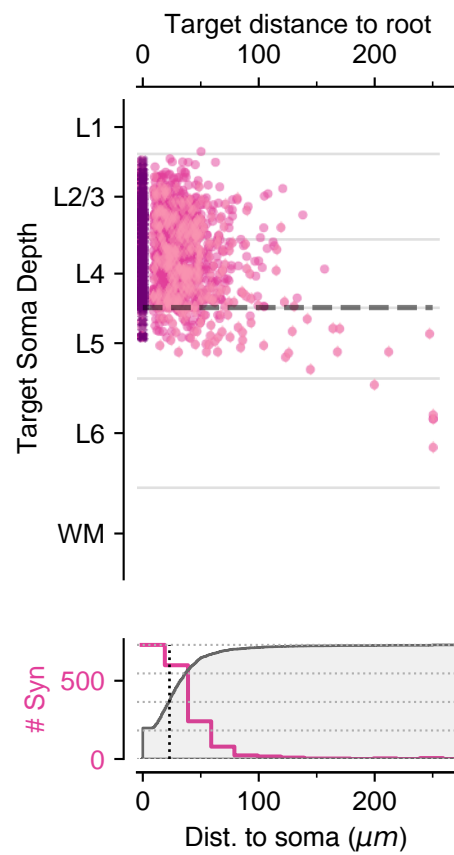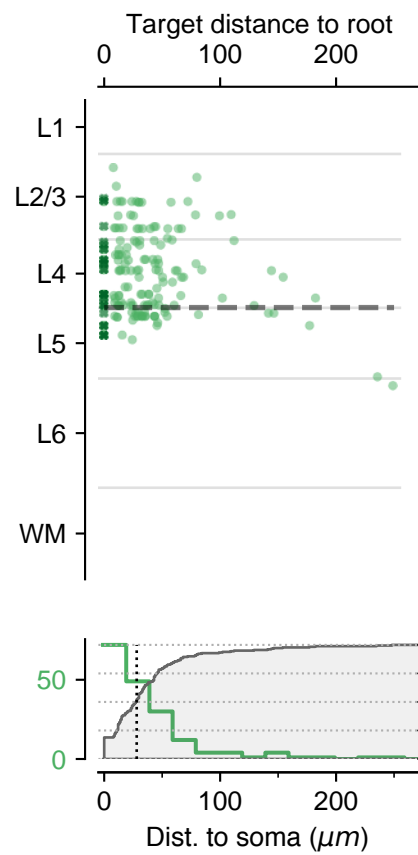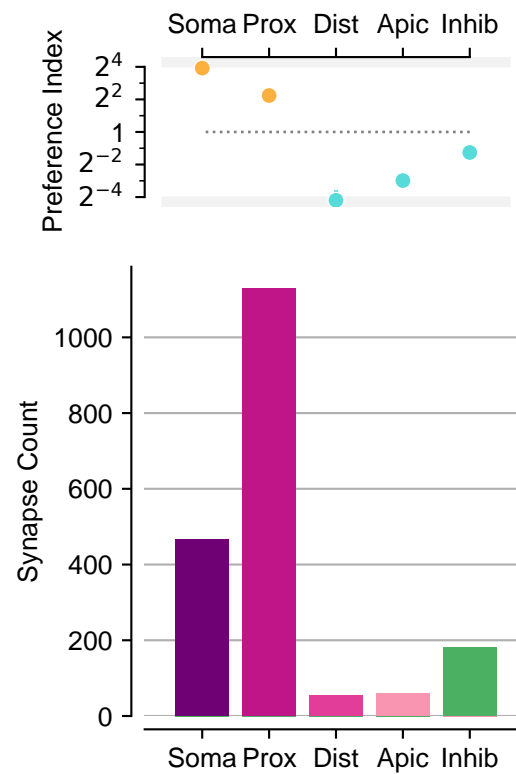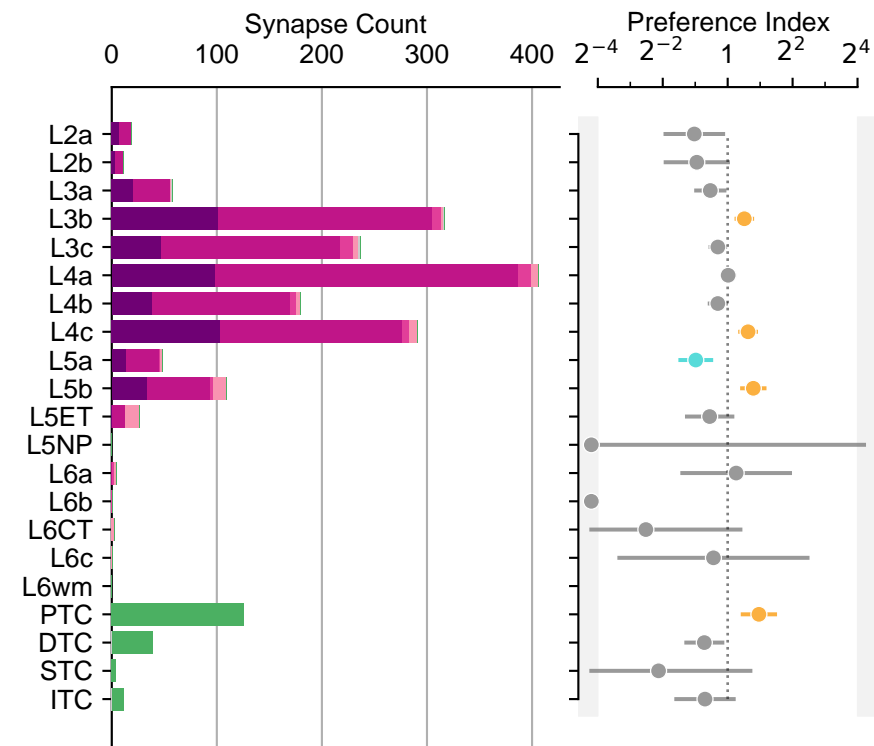



# Group 5

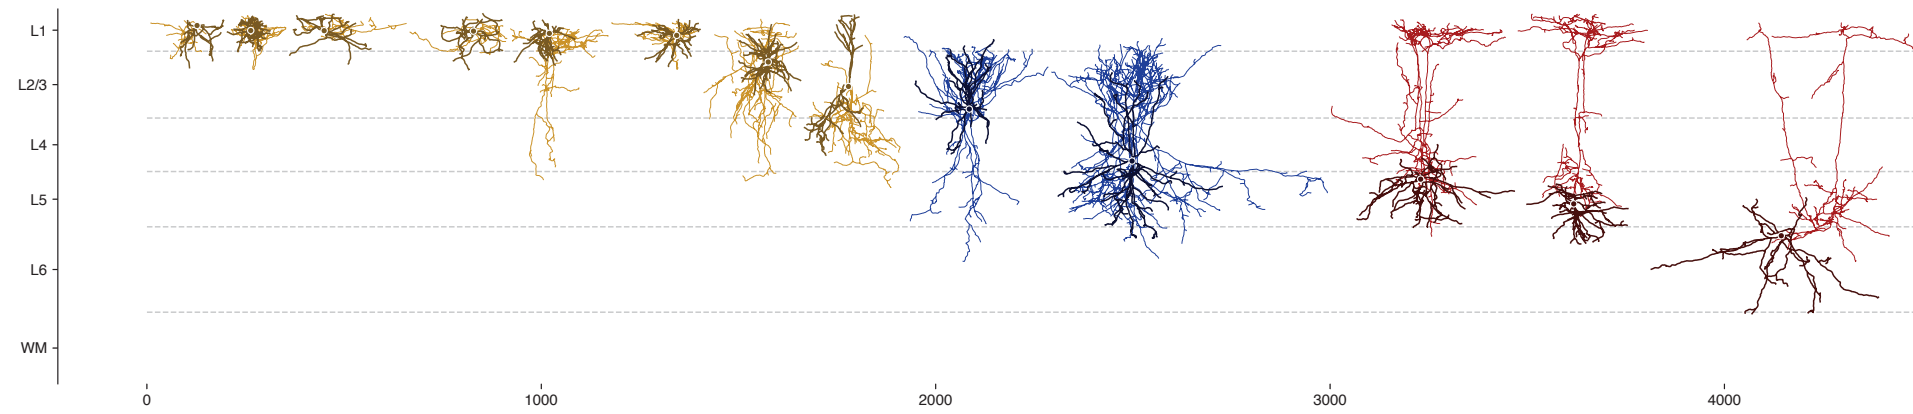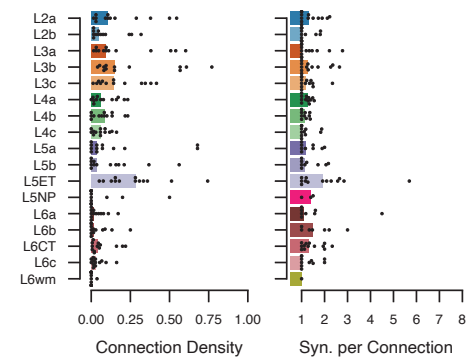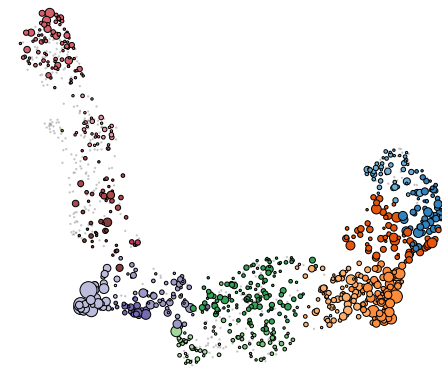

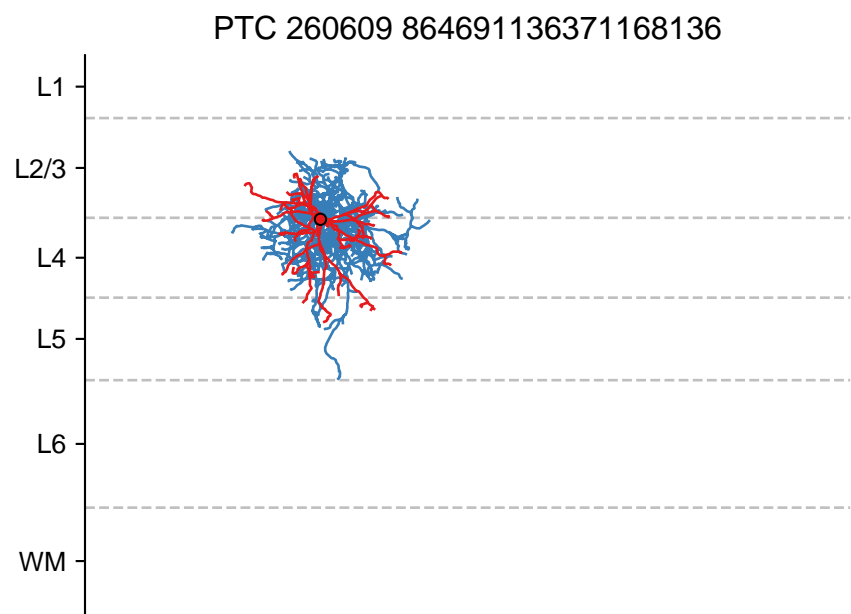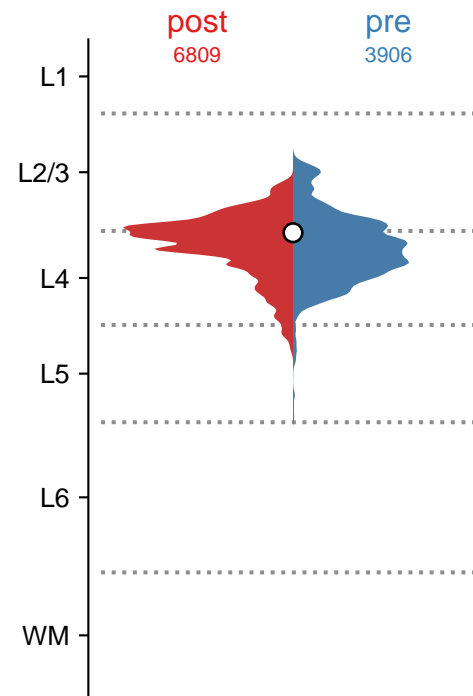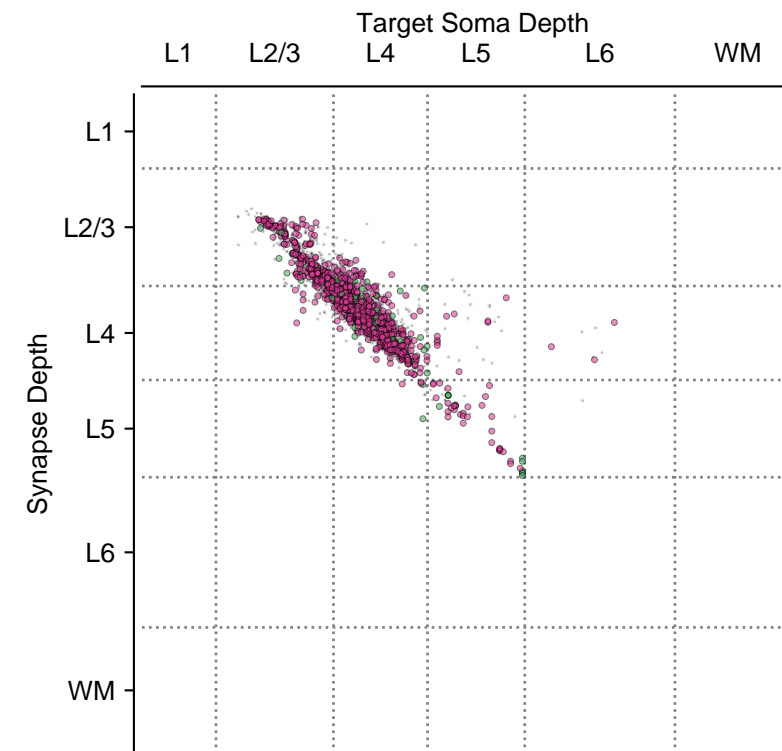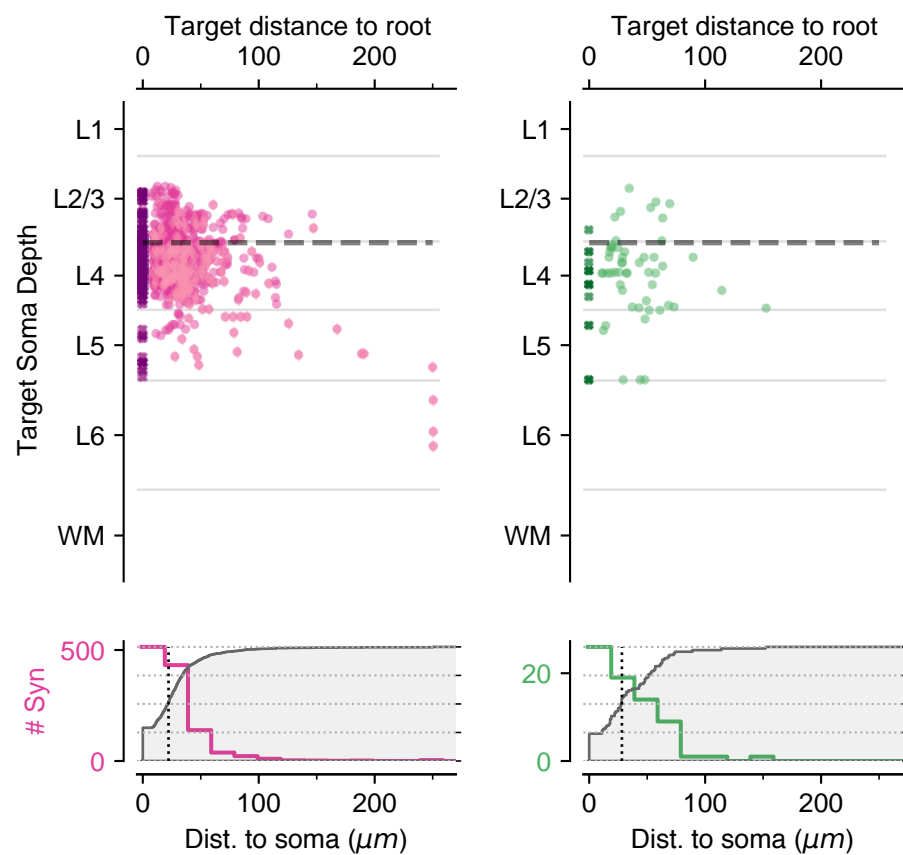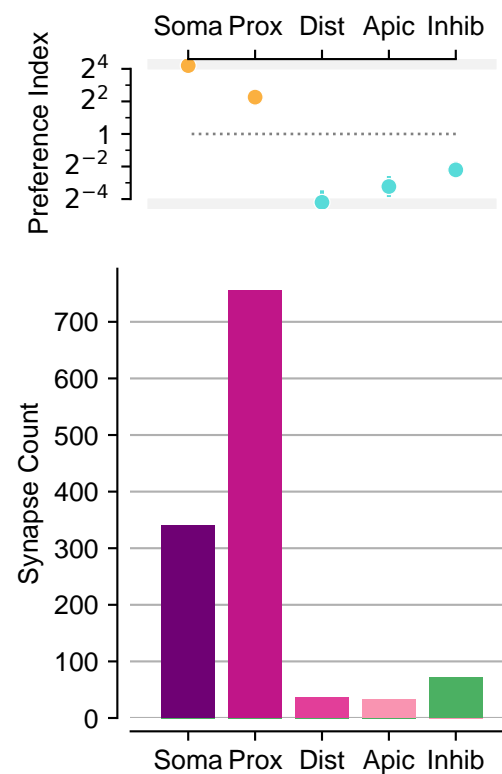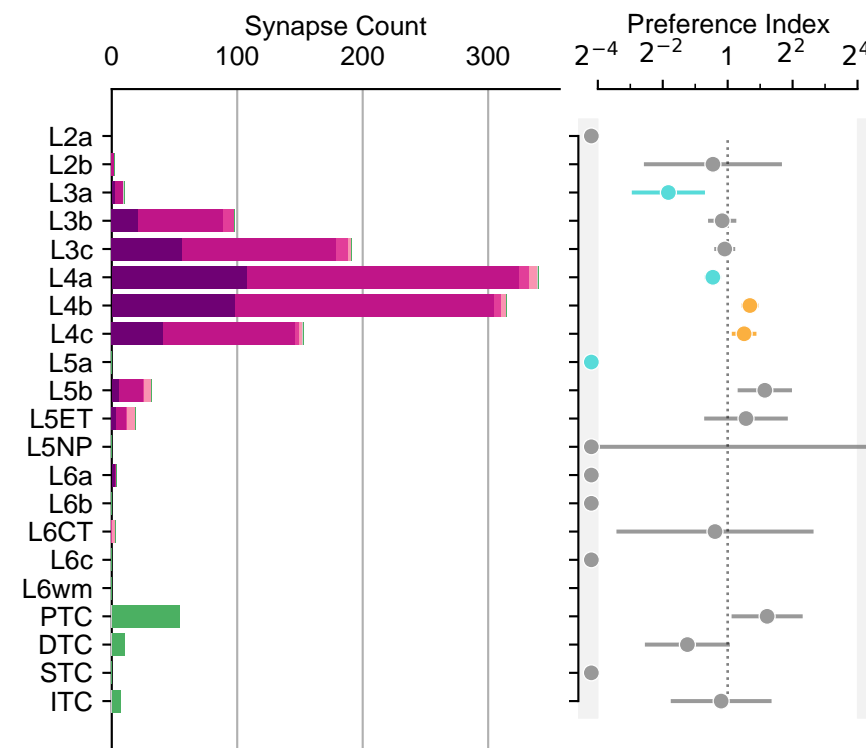

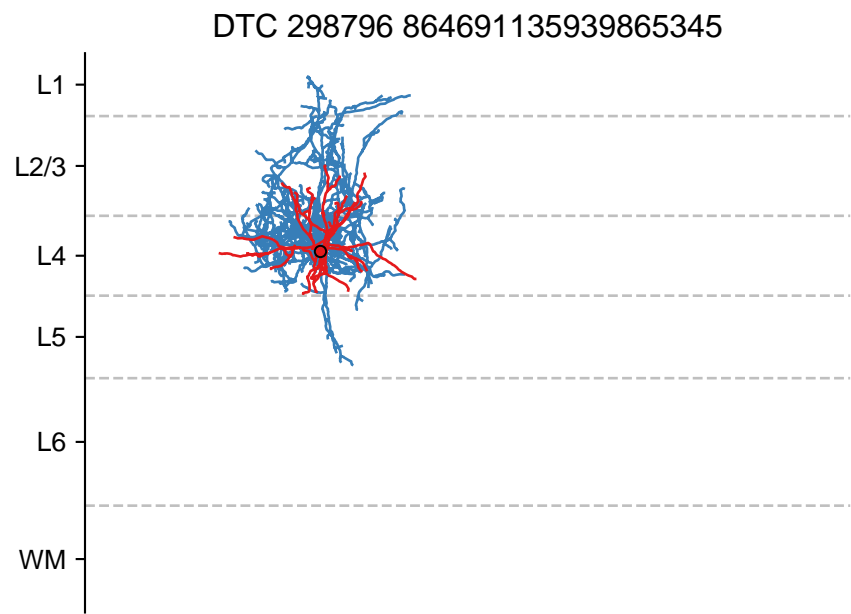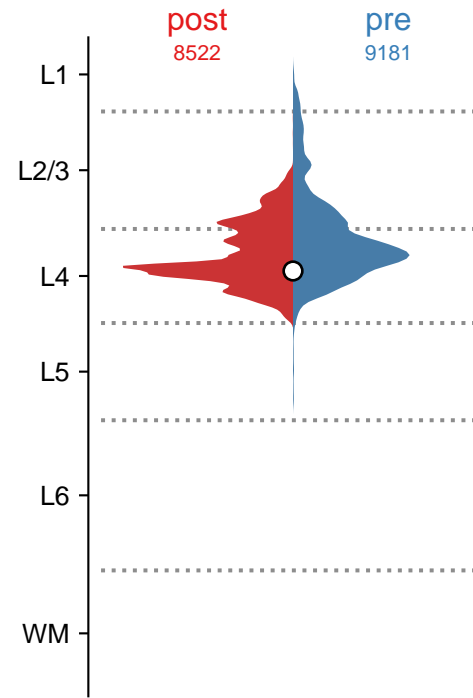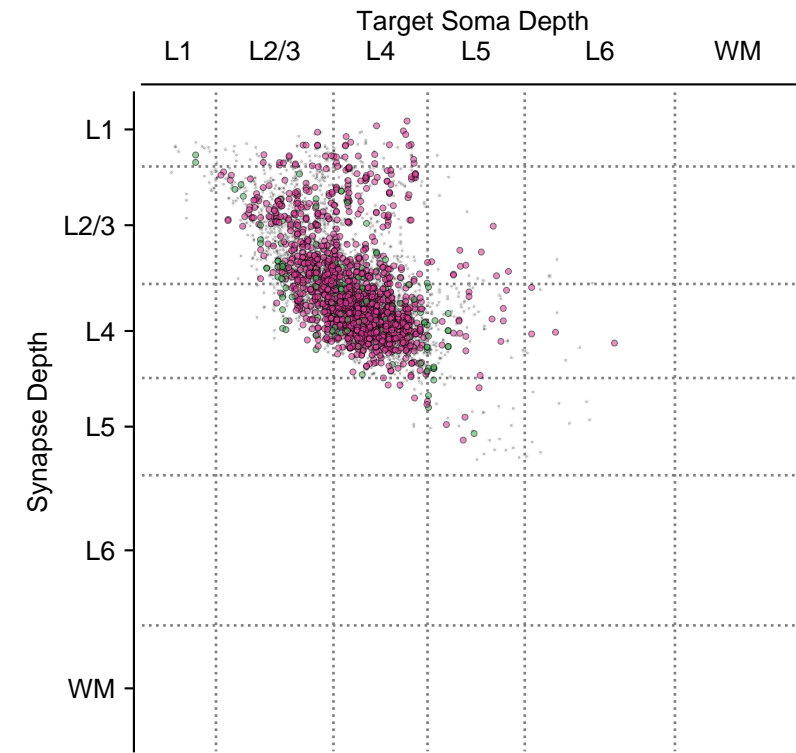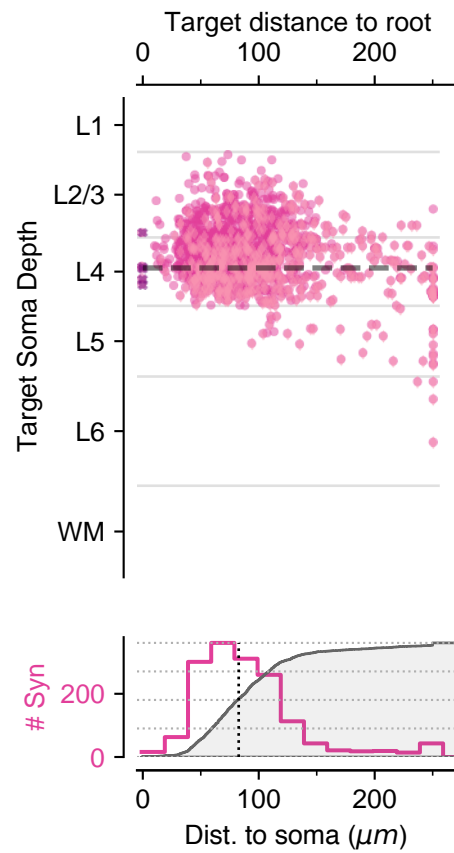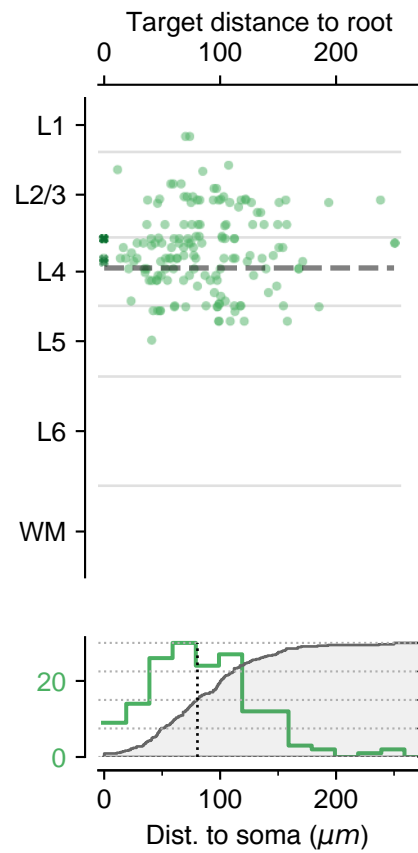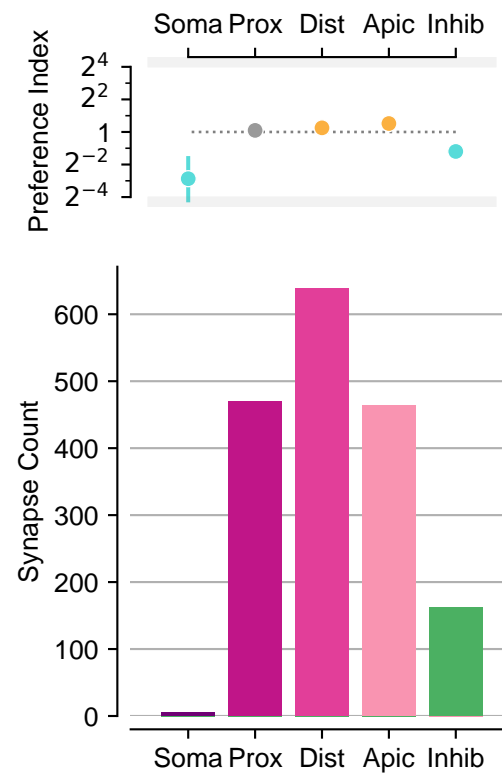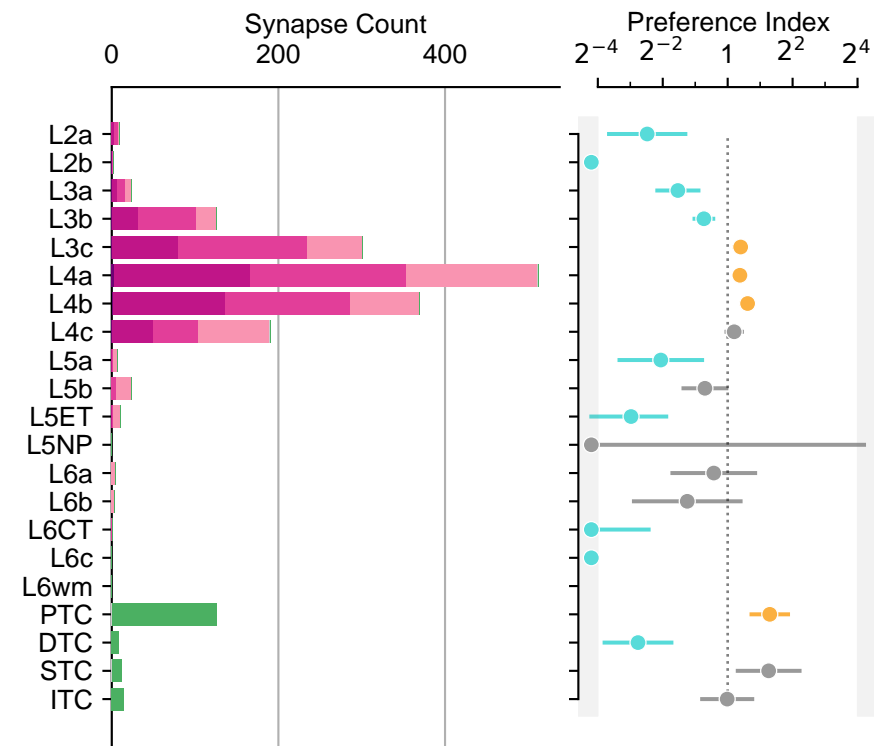

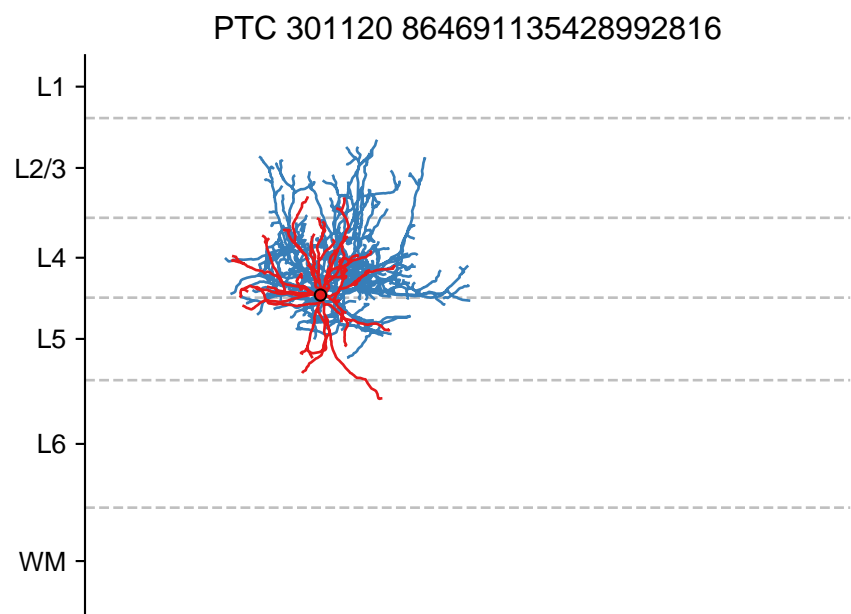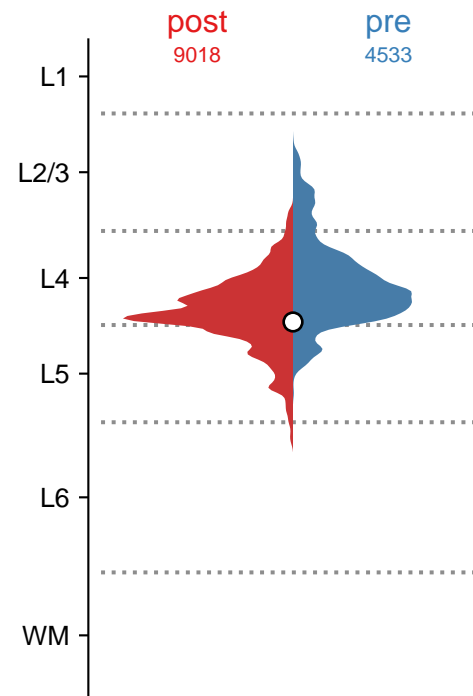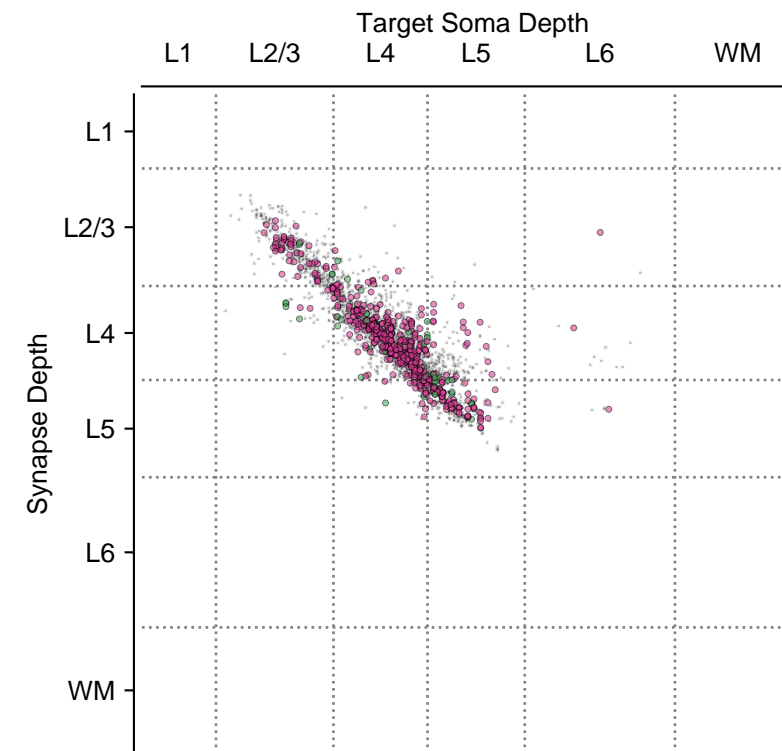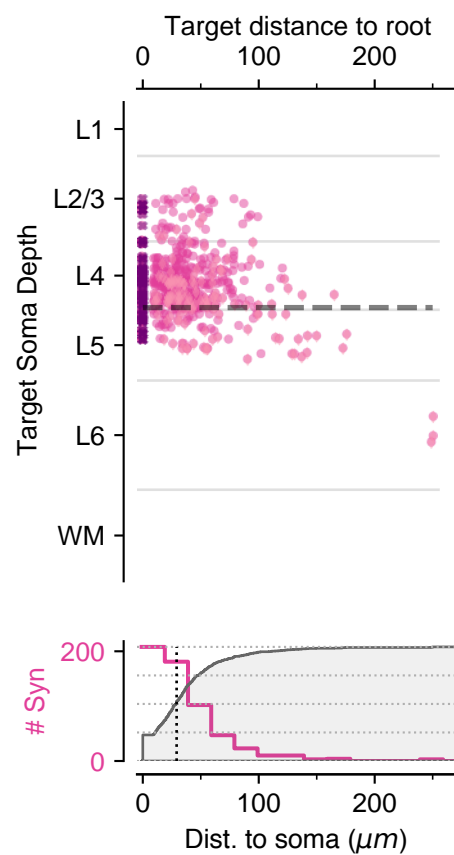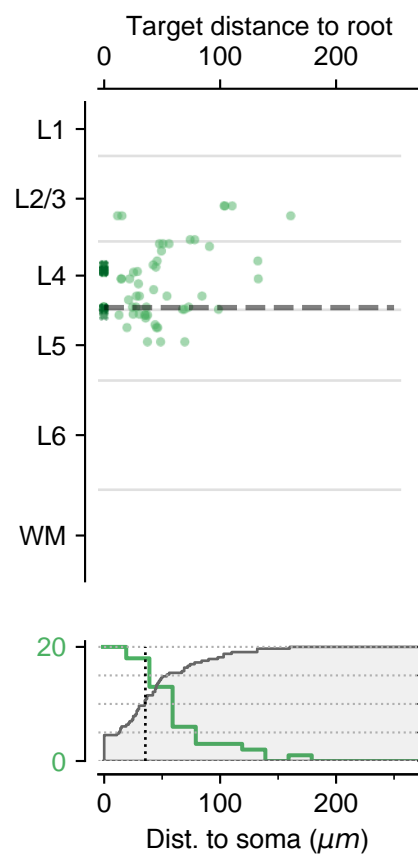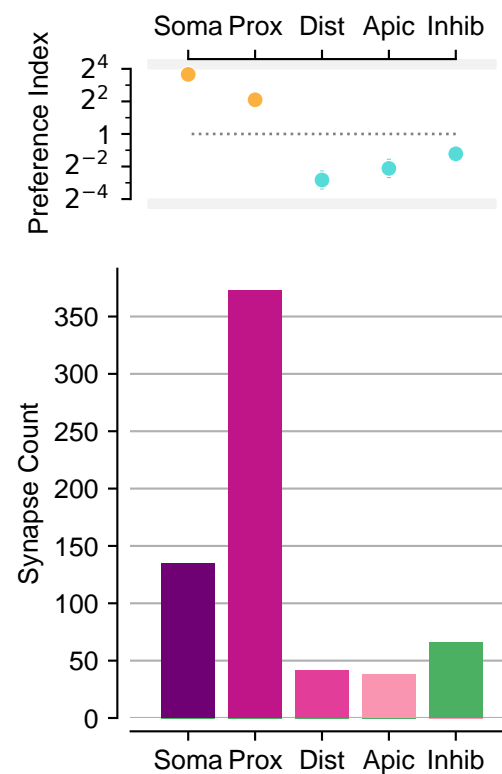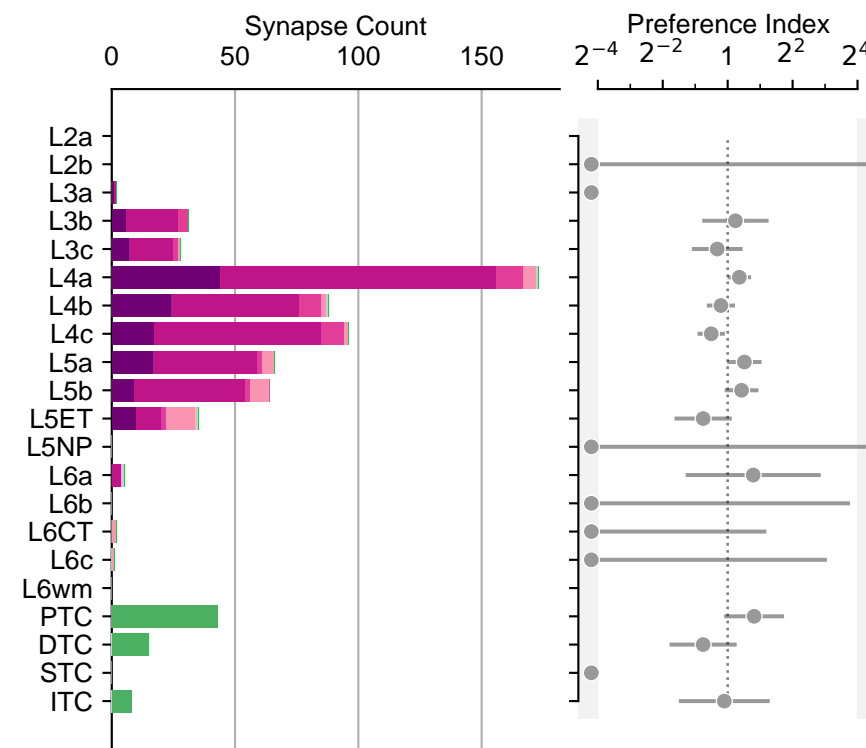

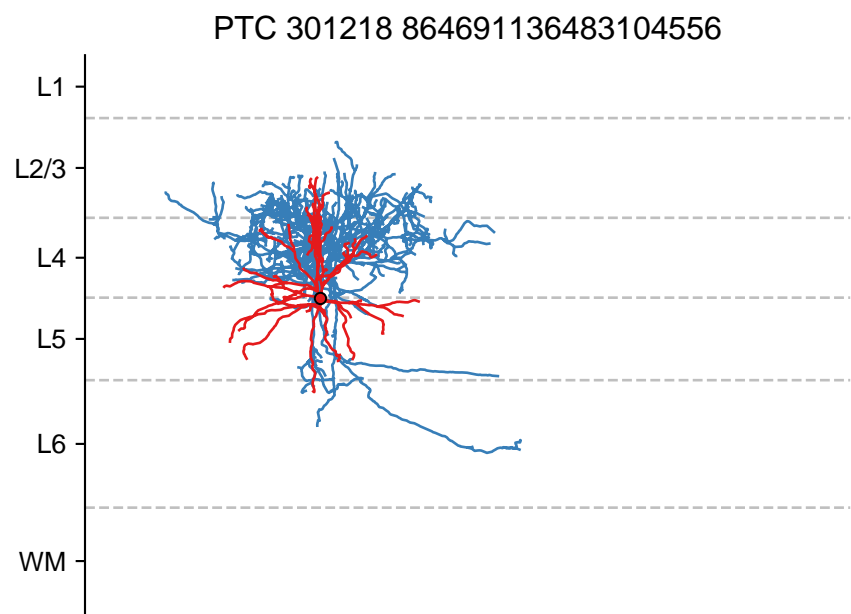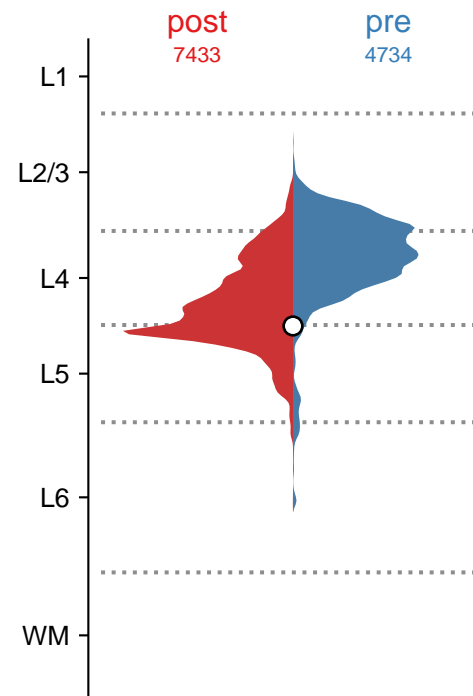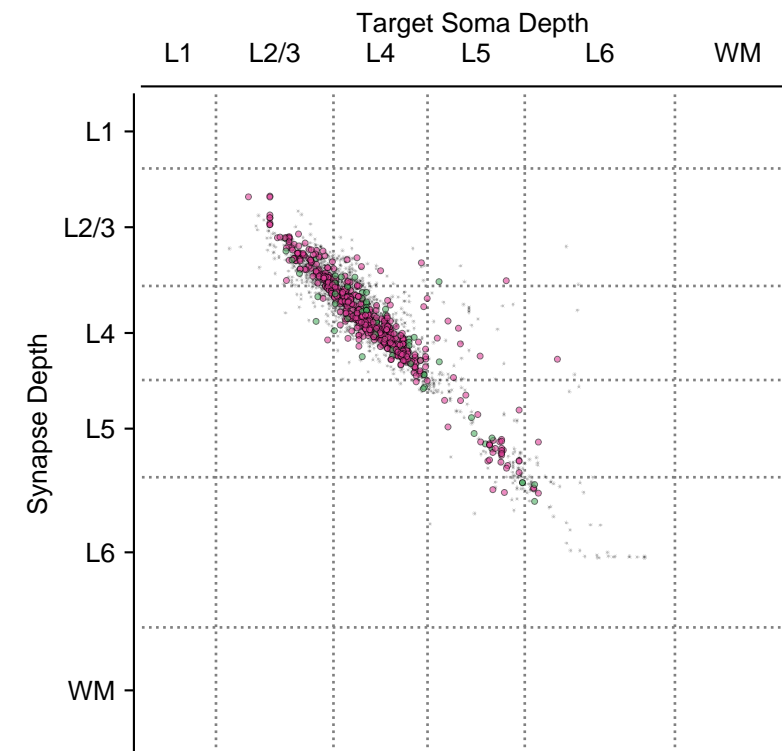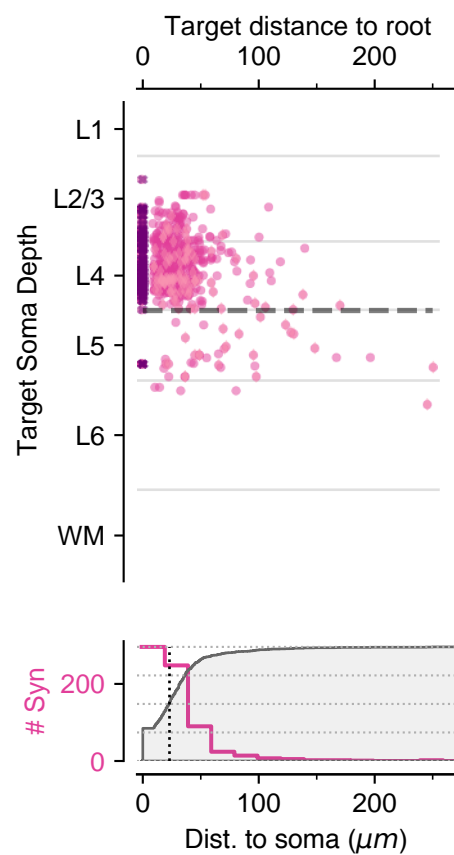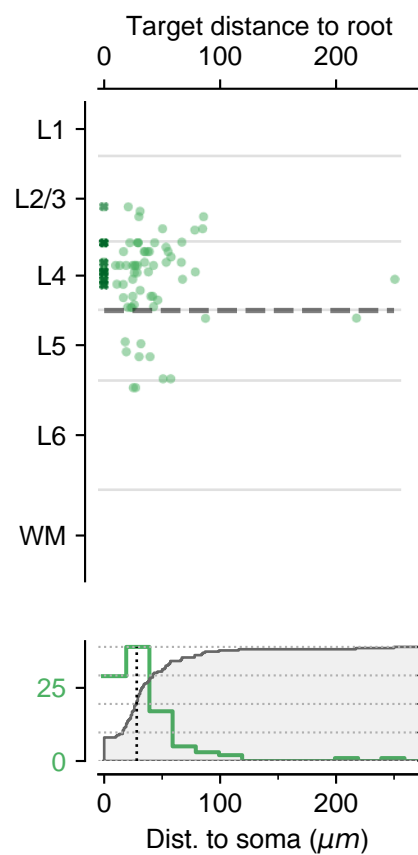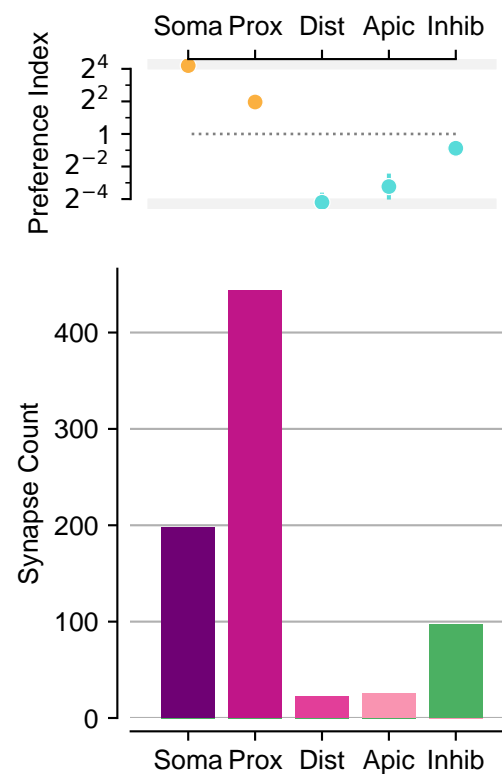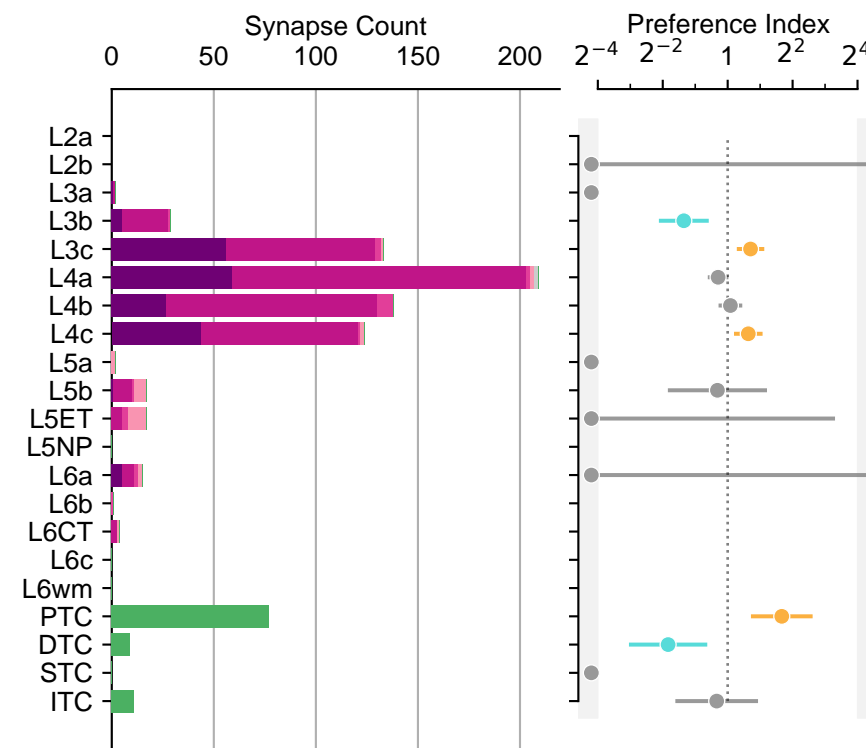

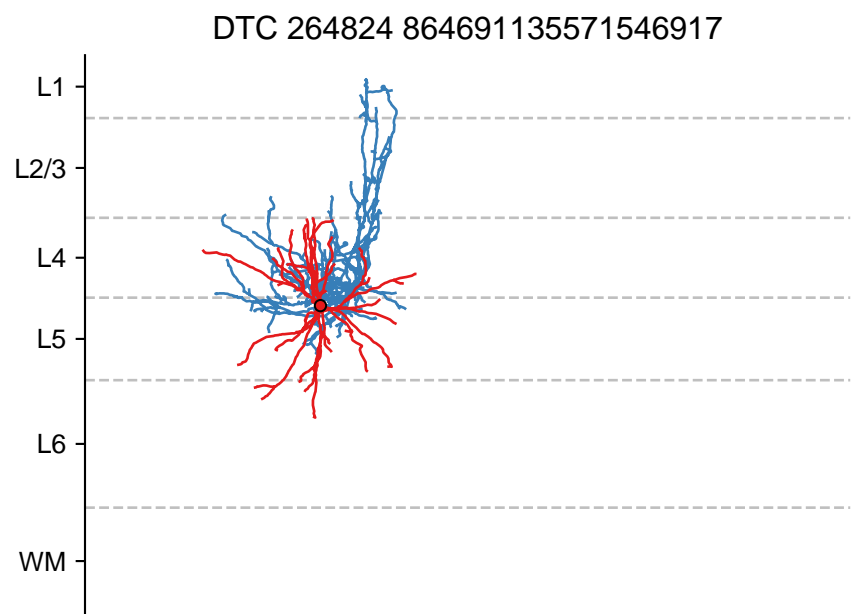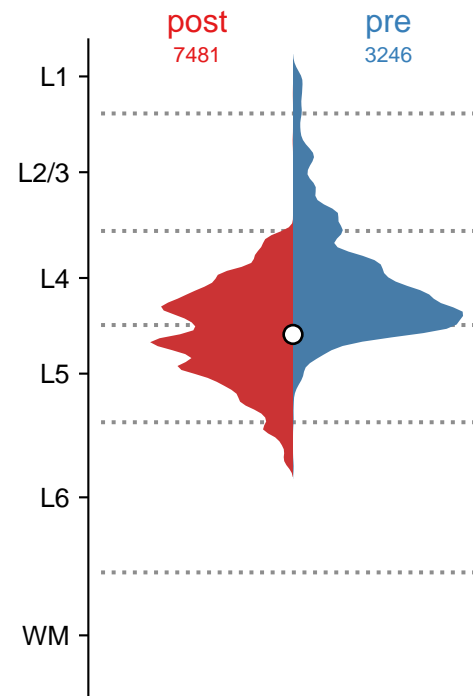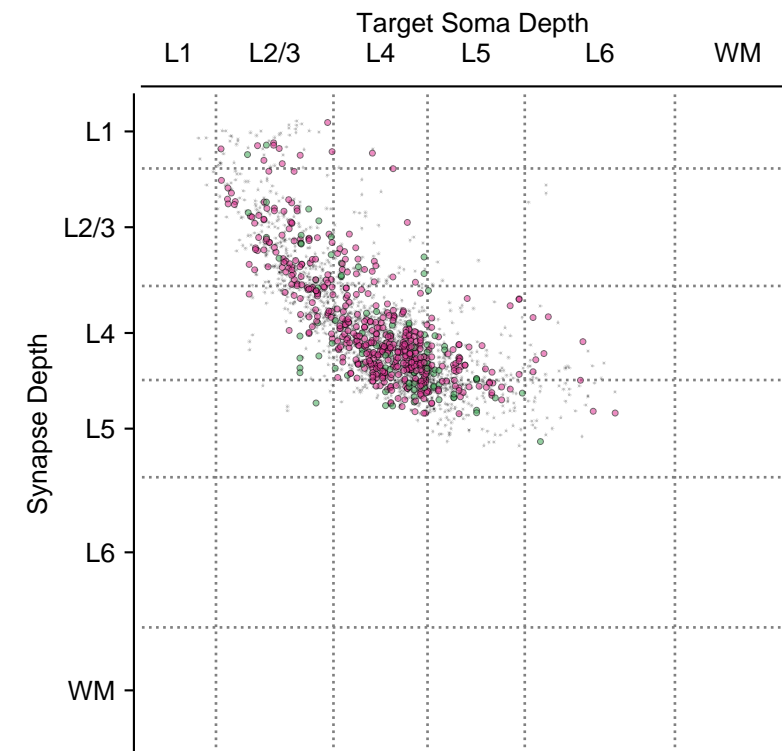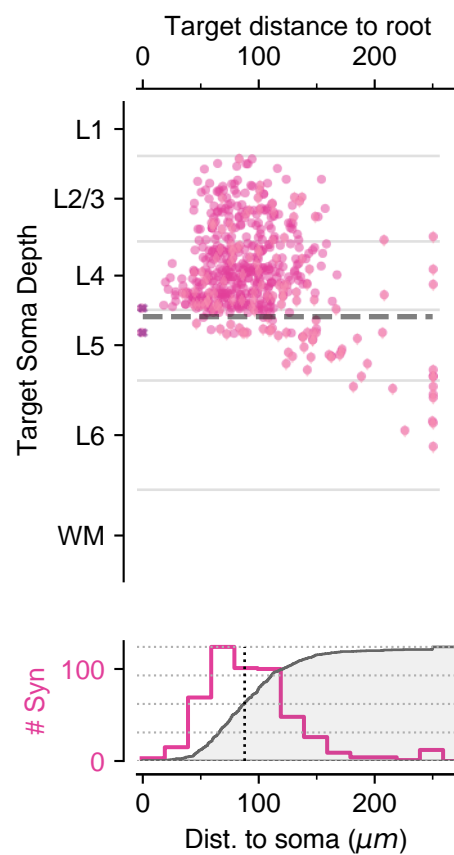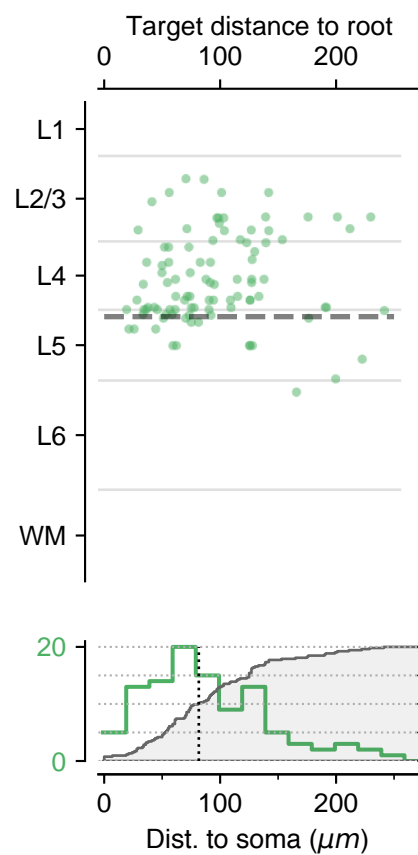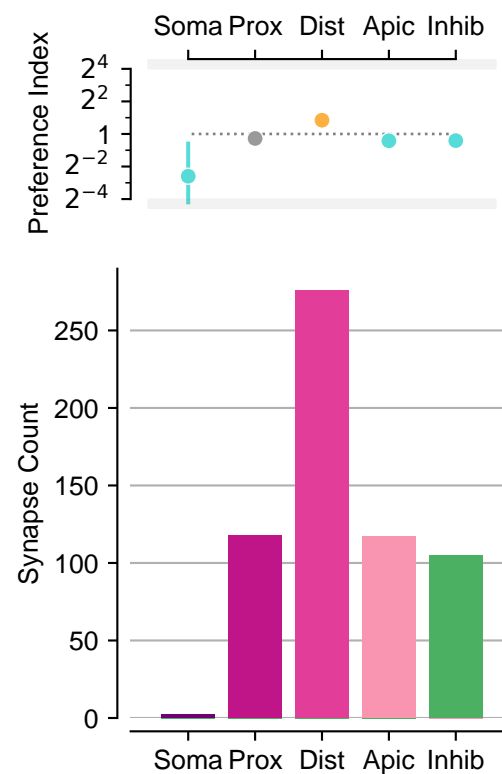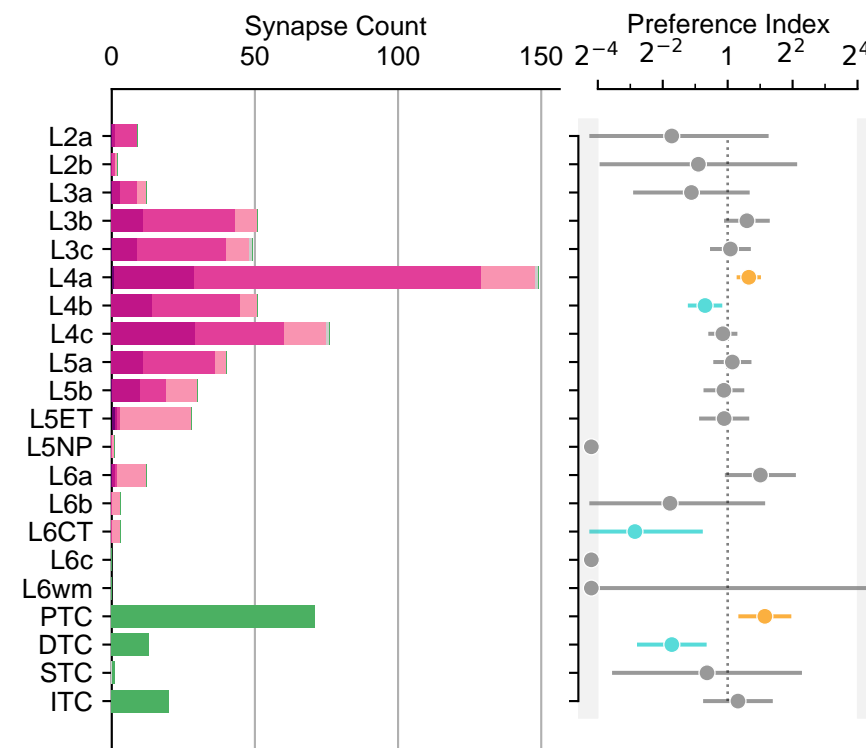

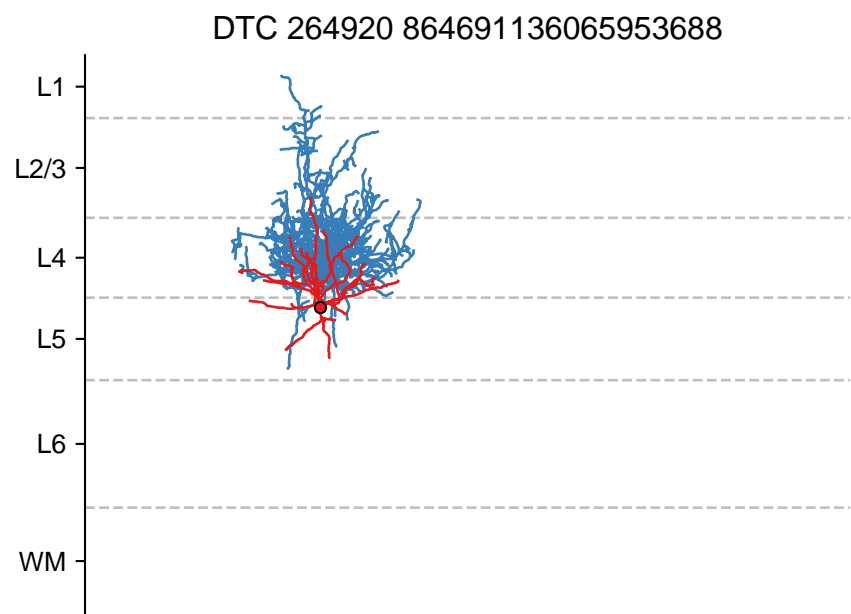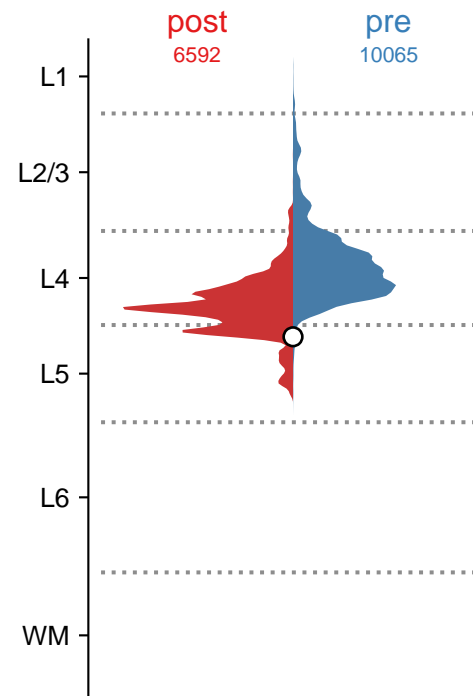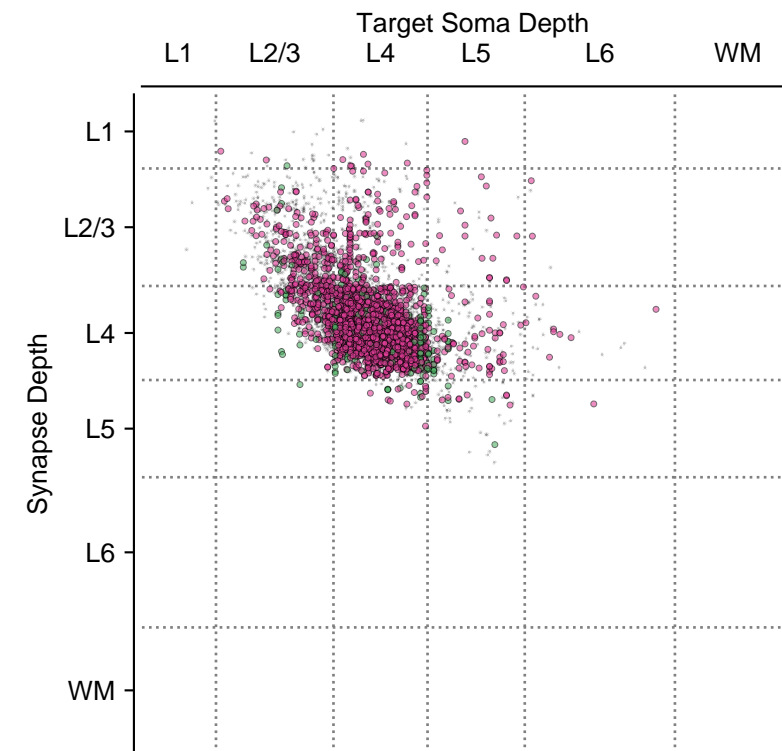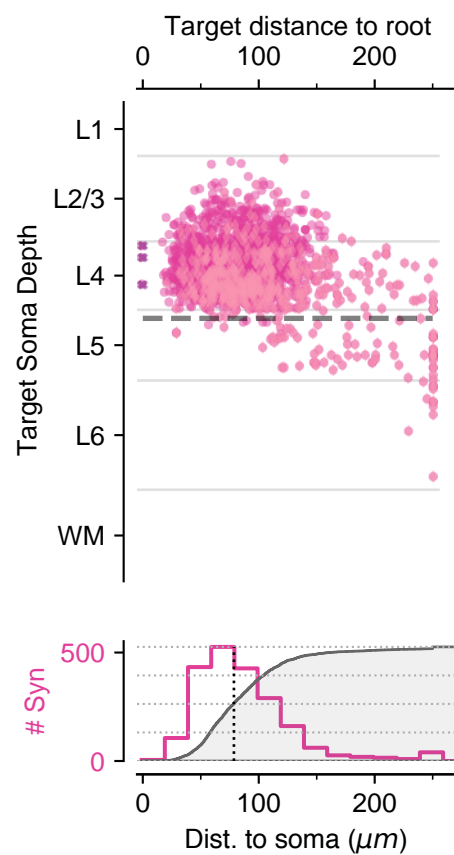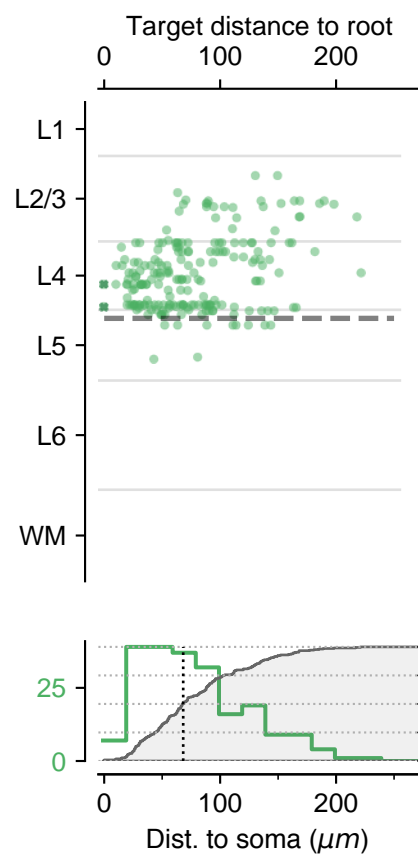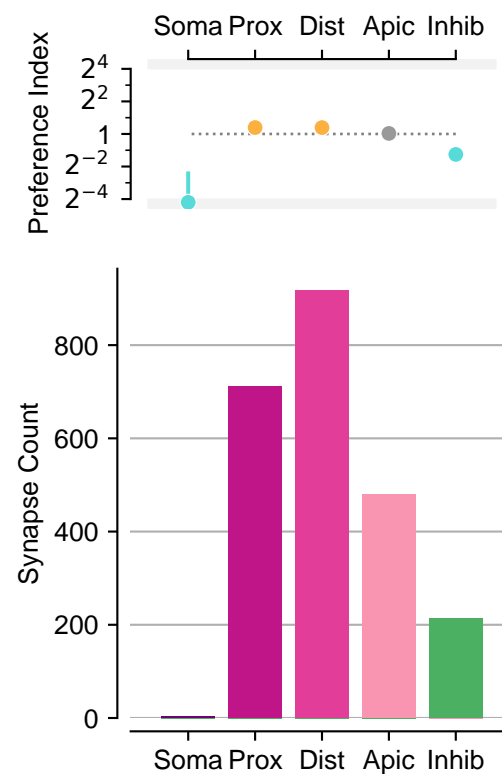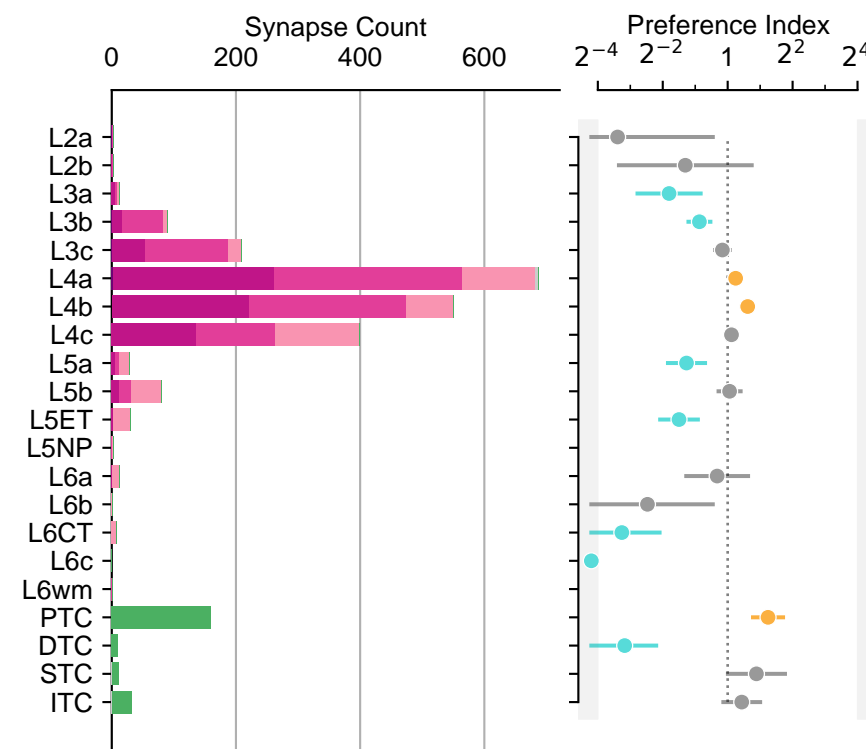

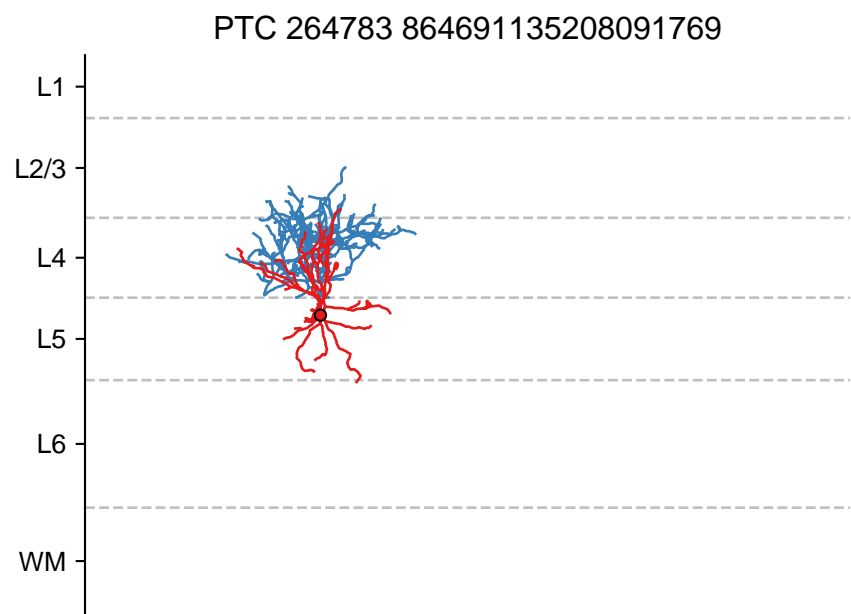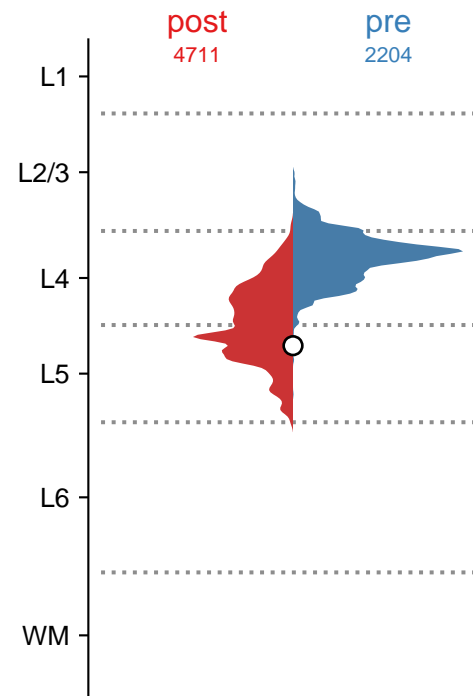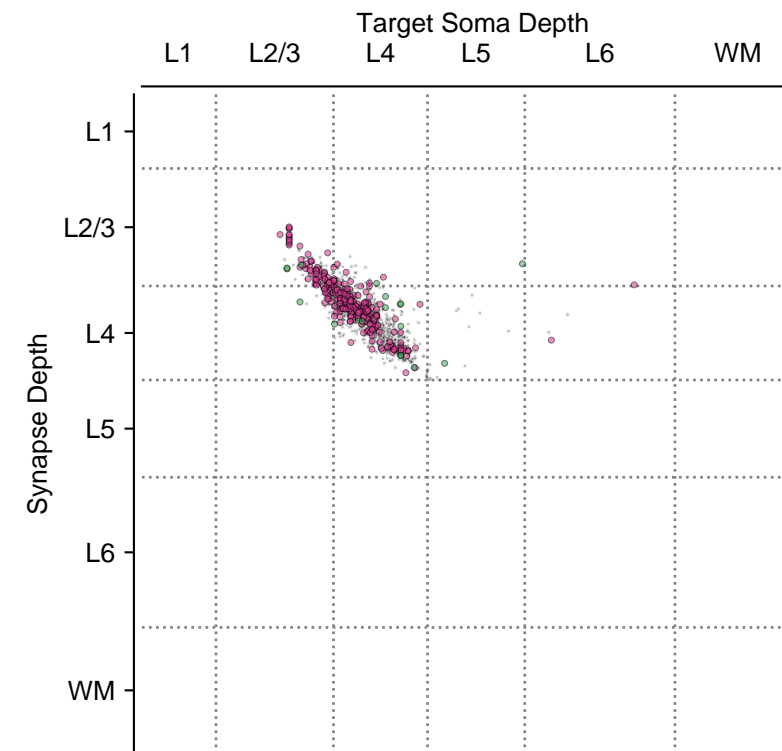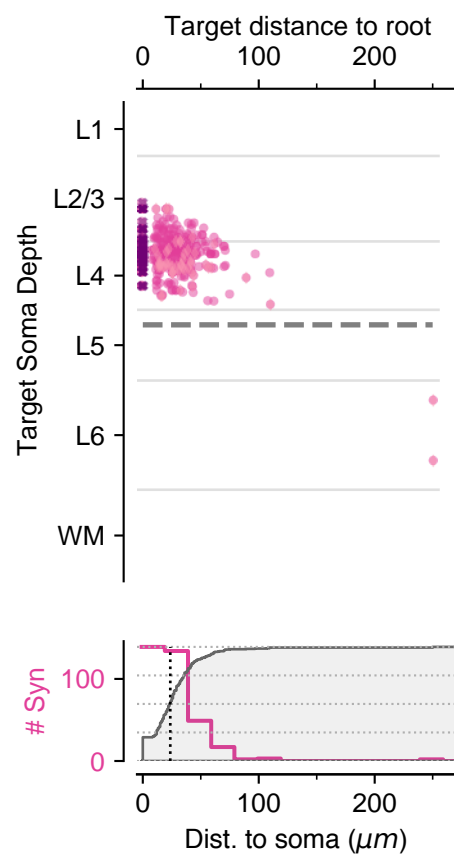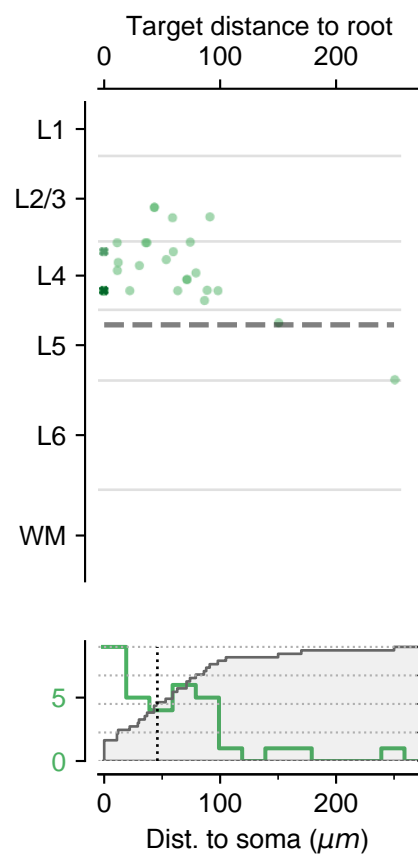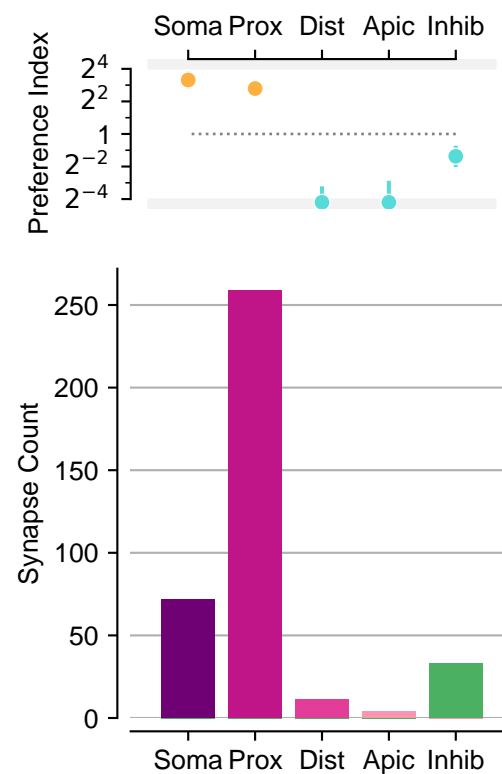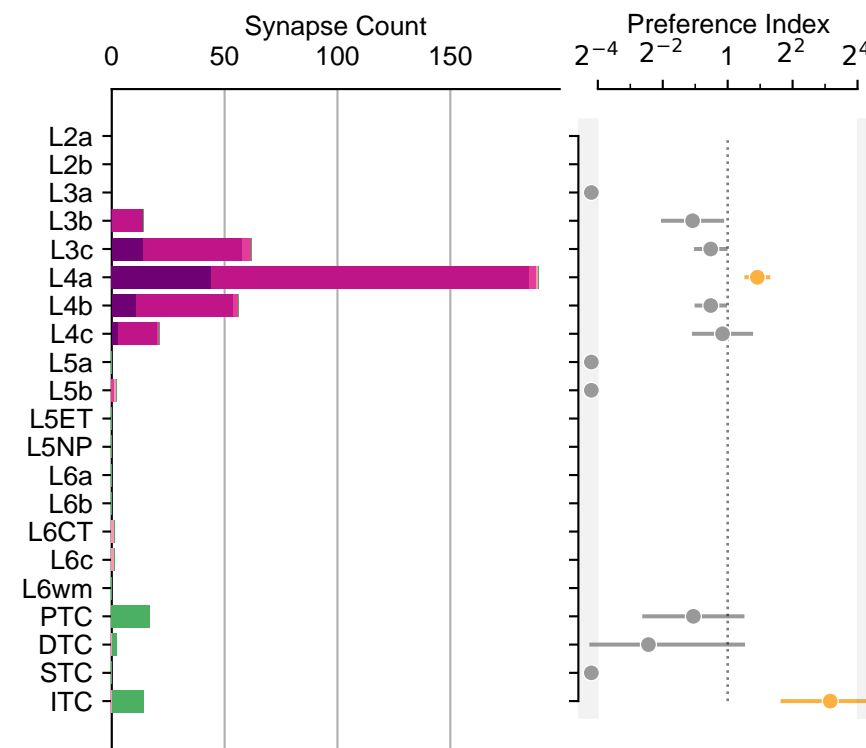



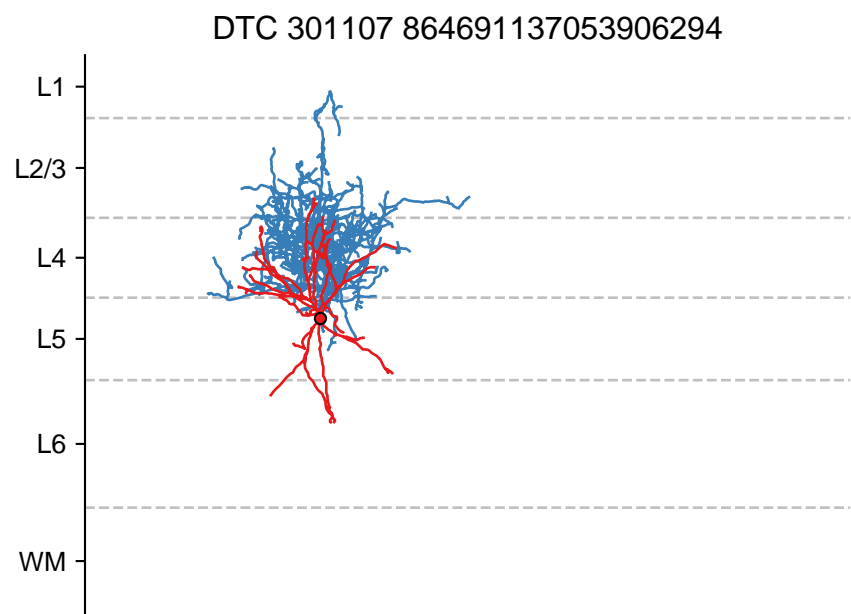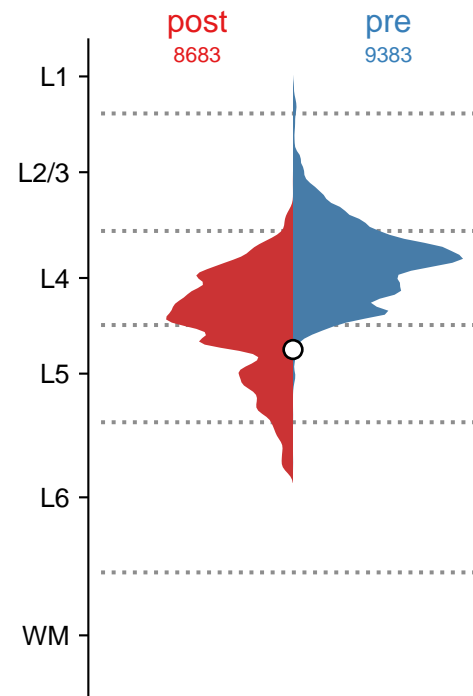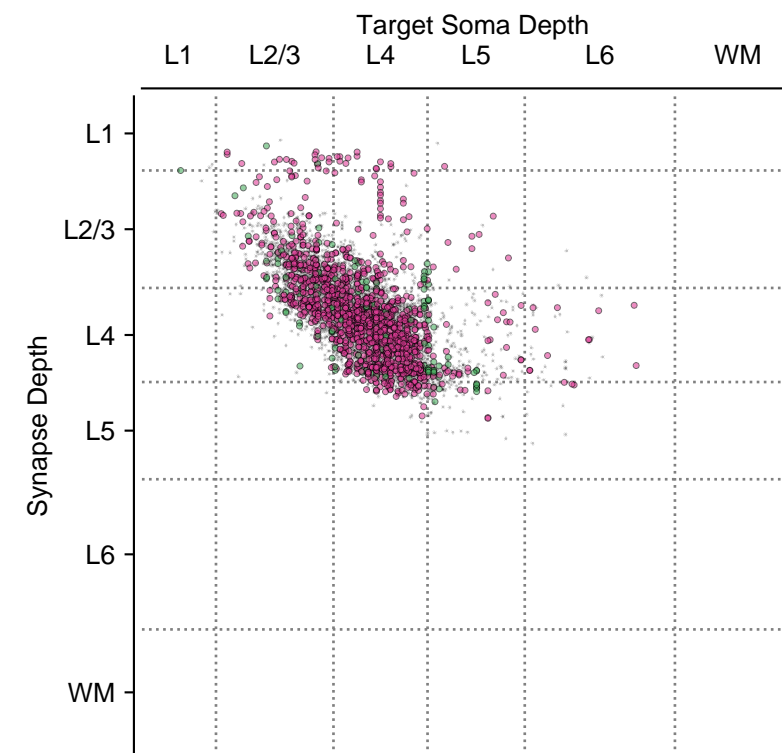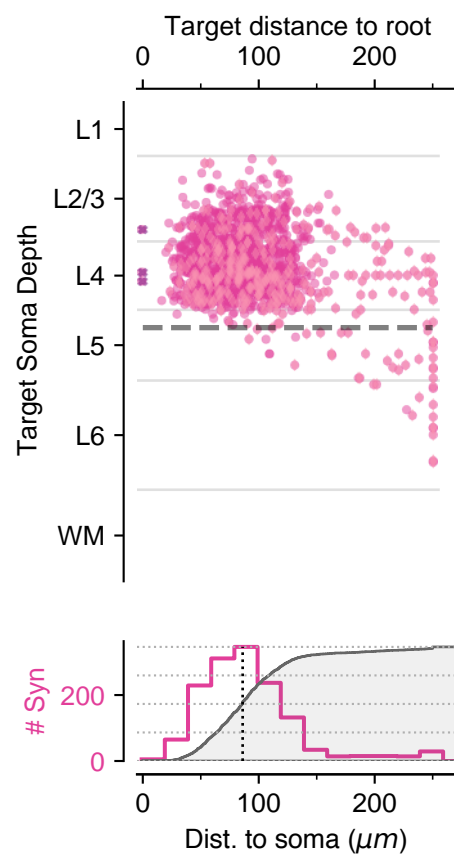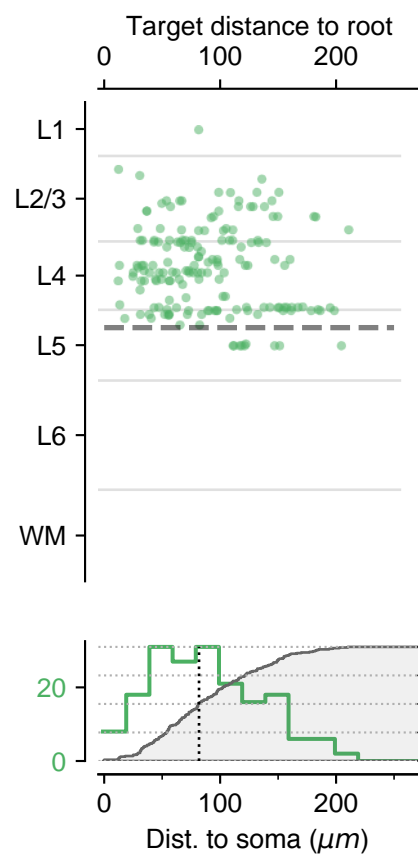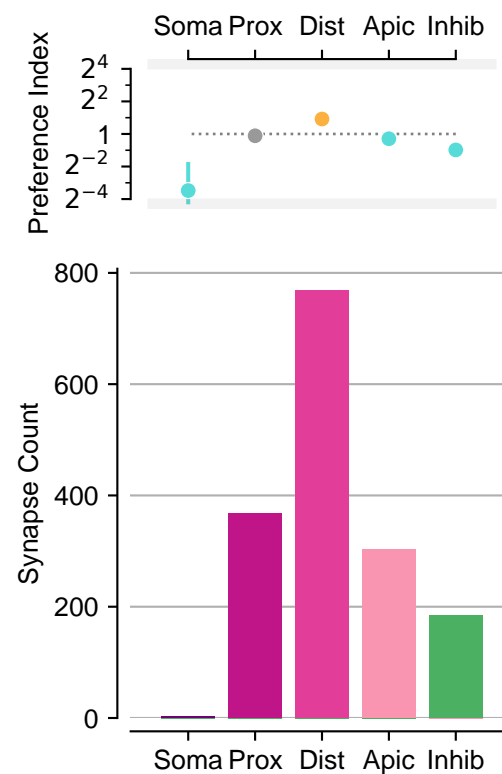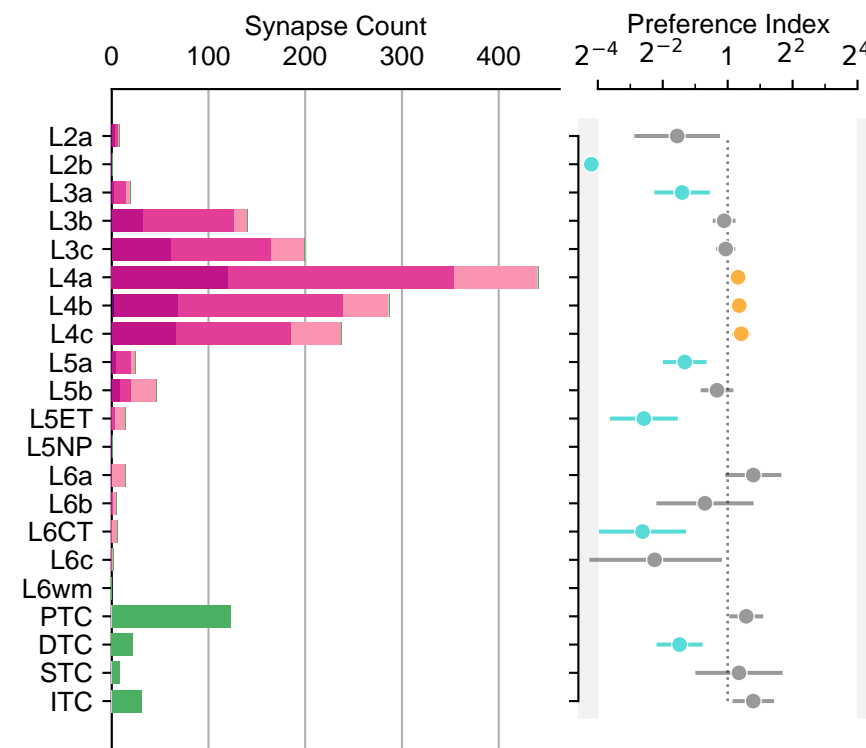

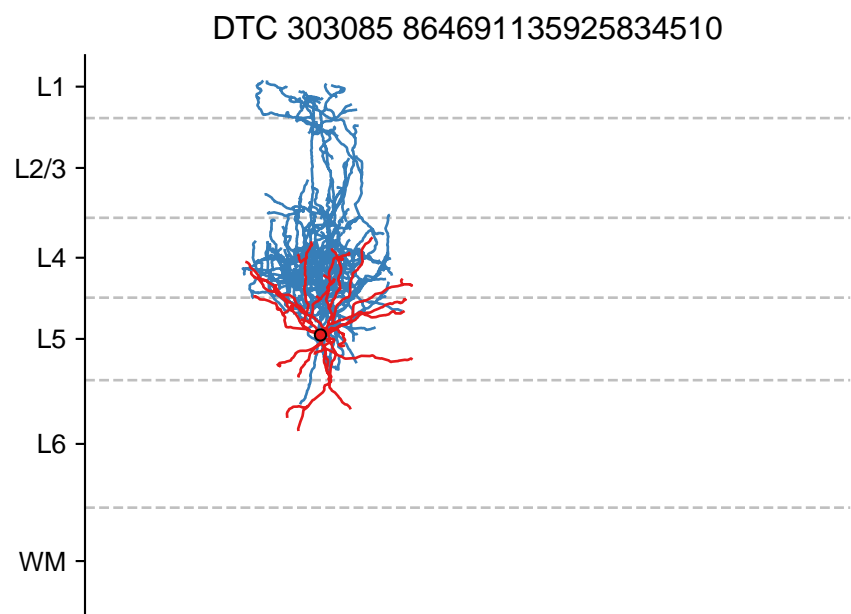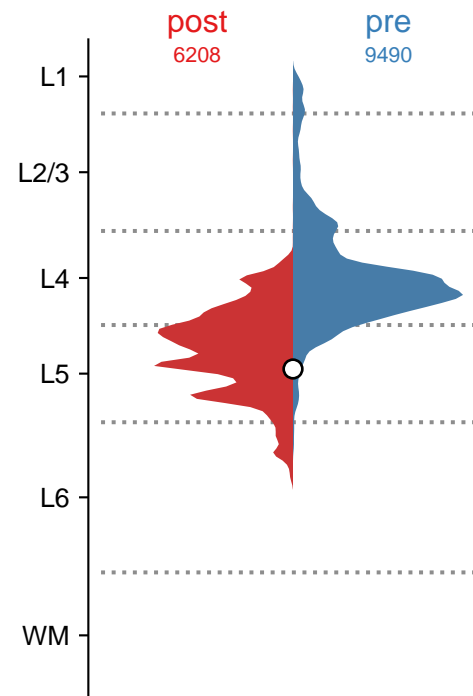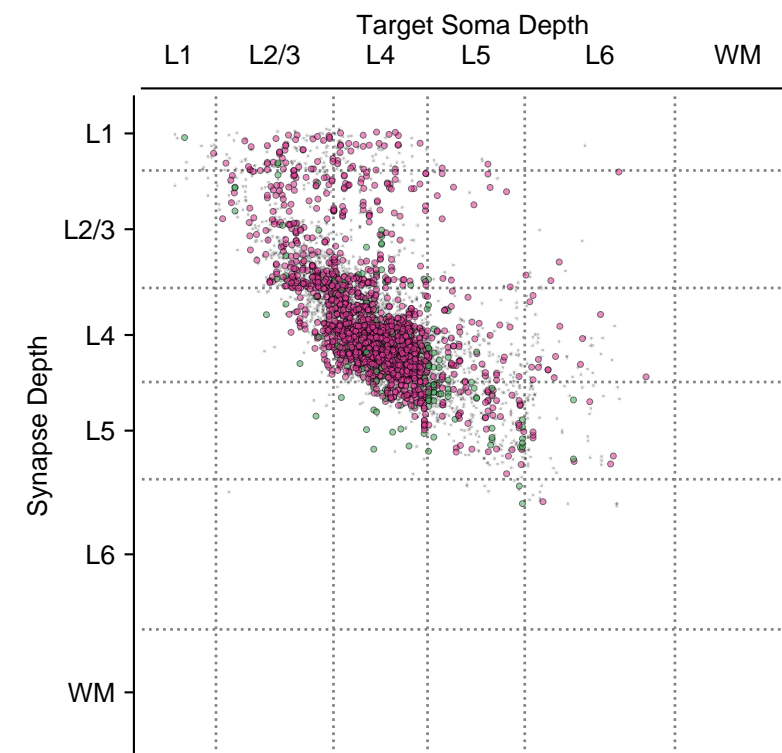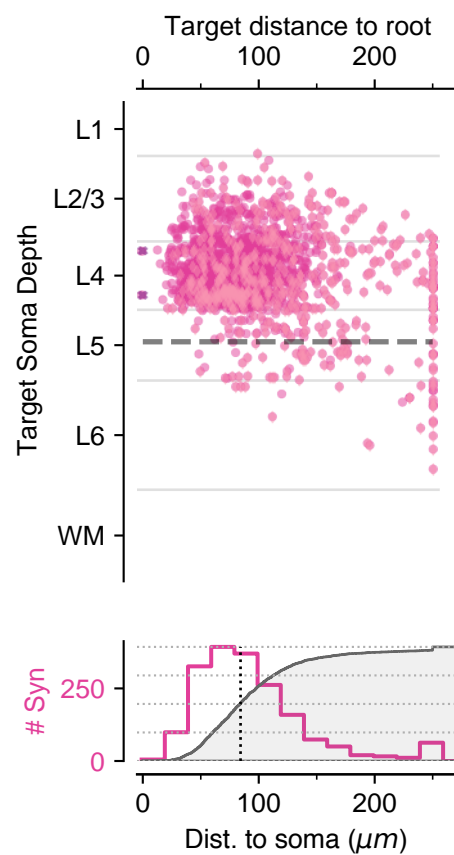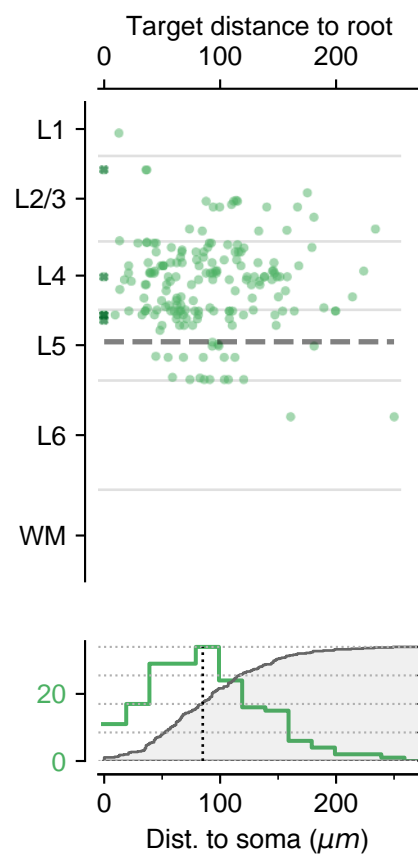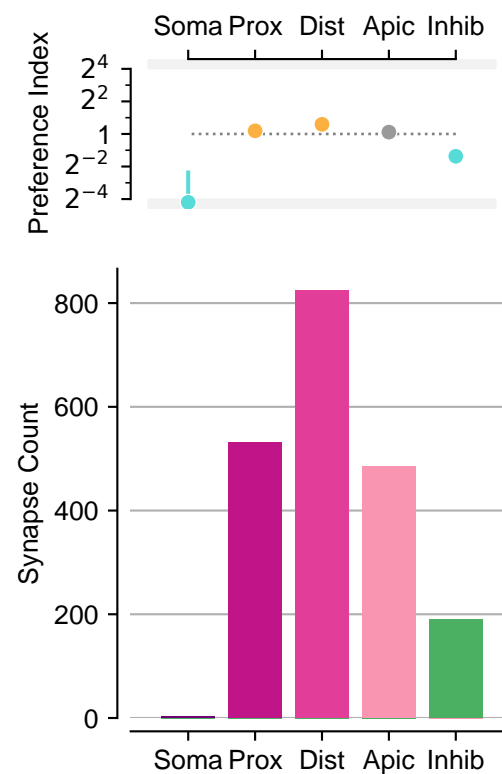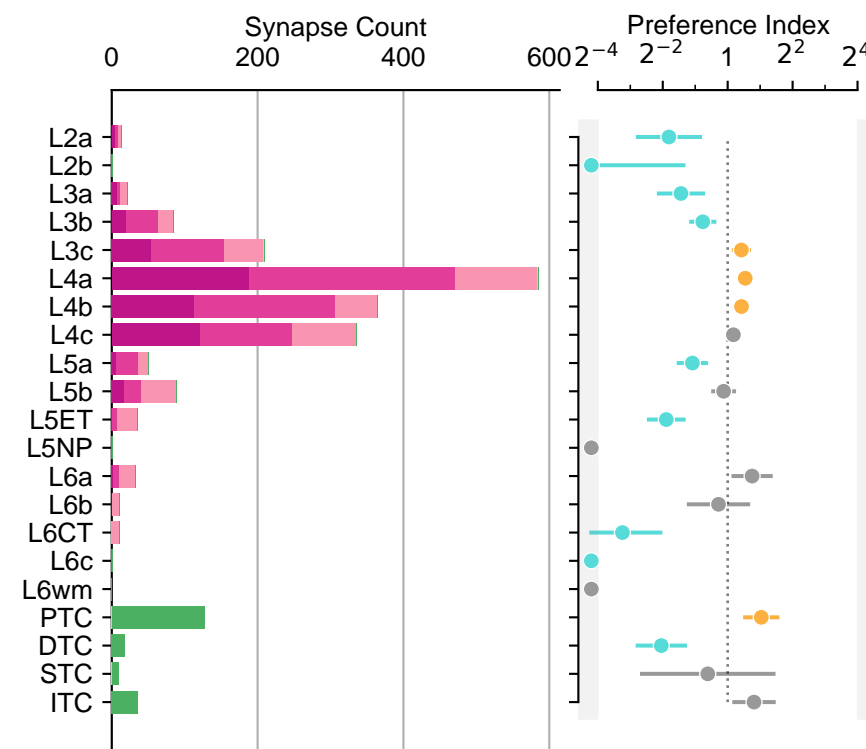

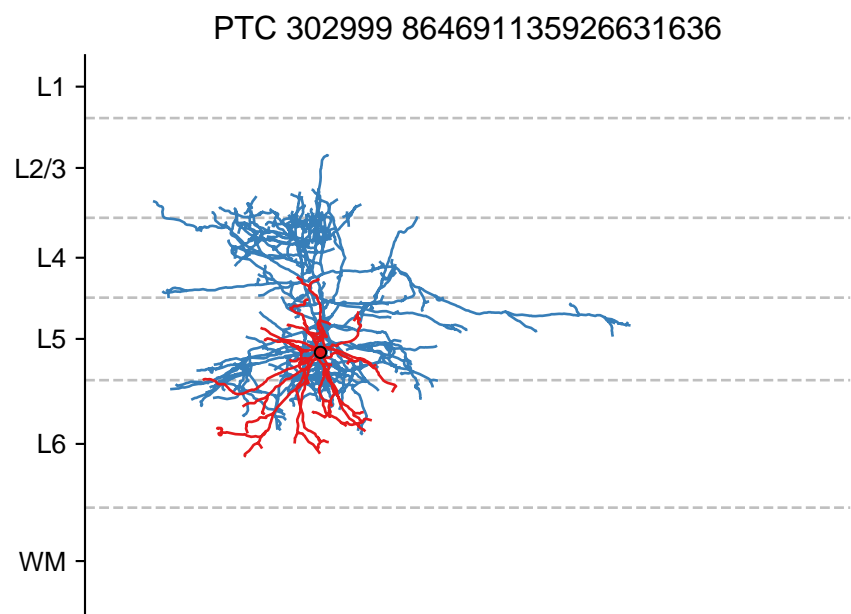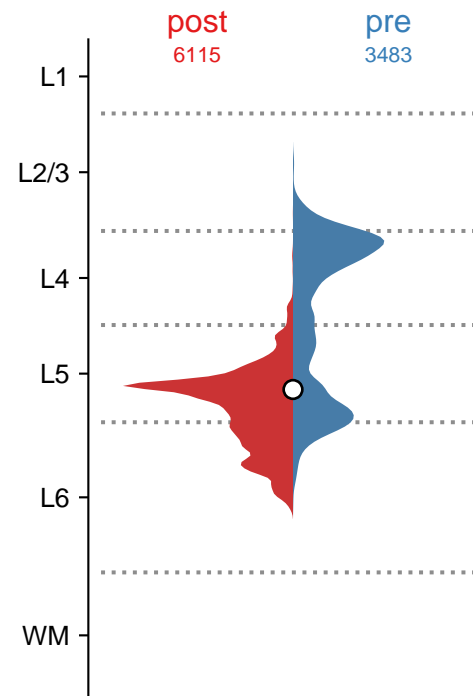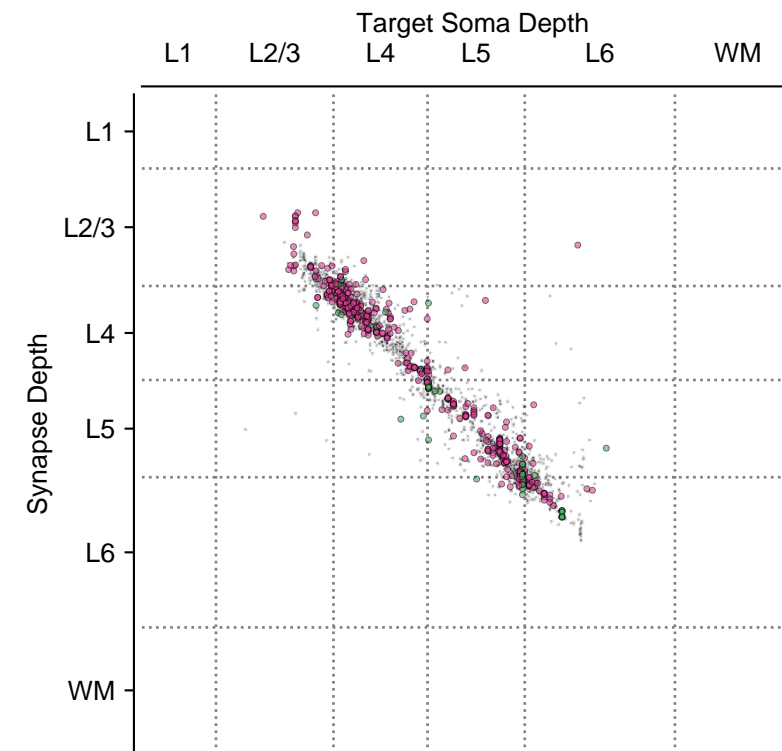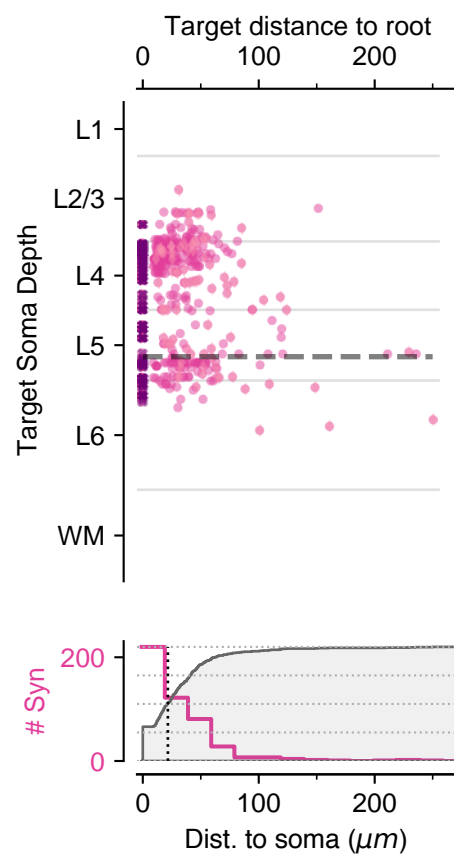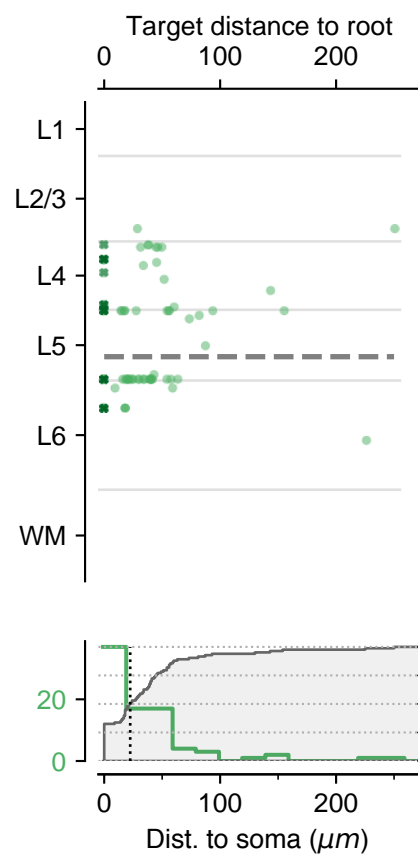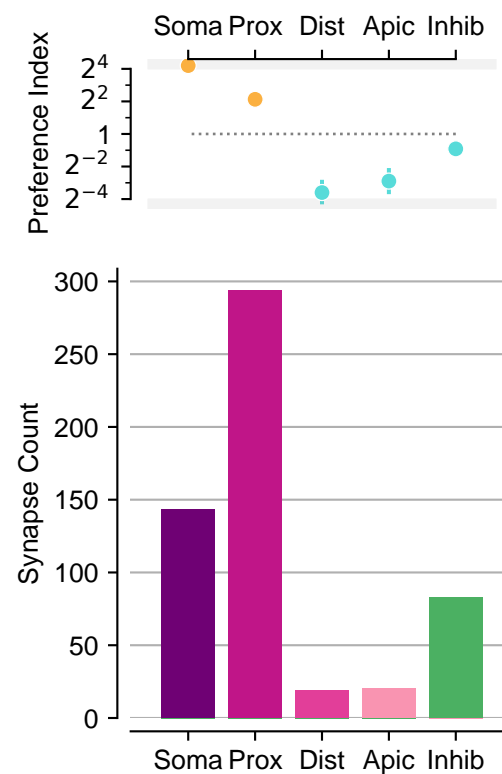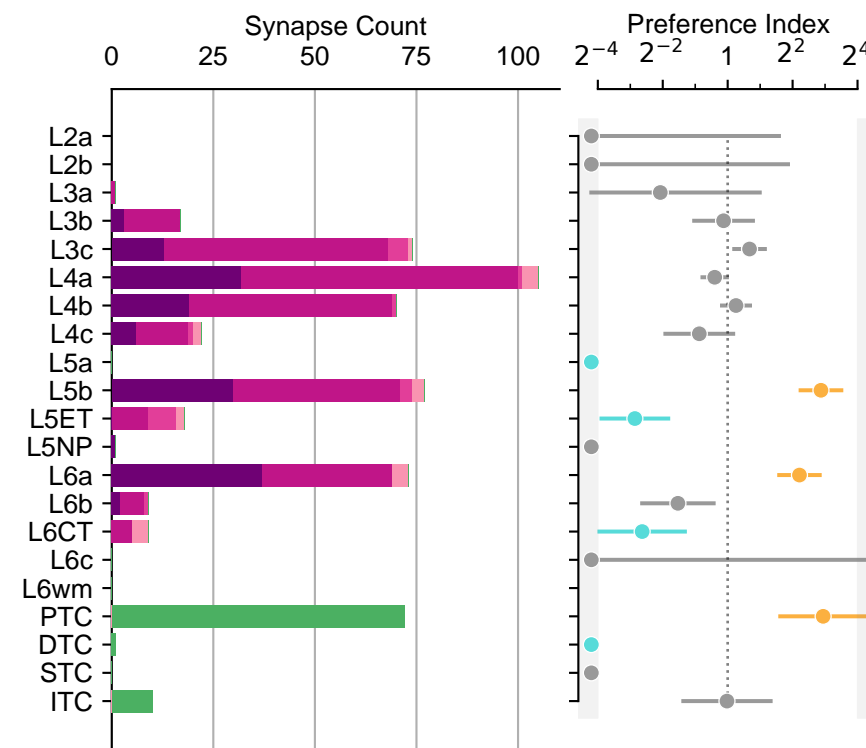

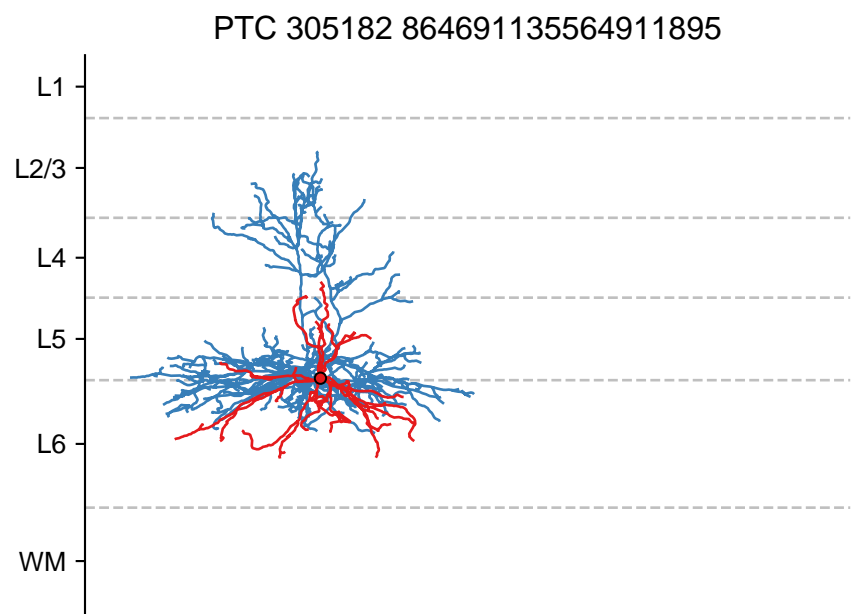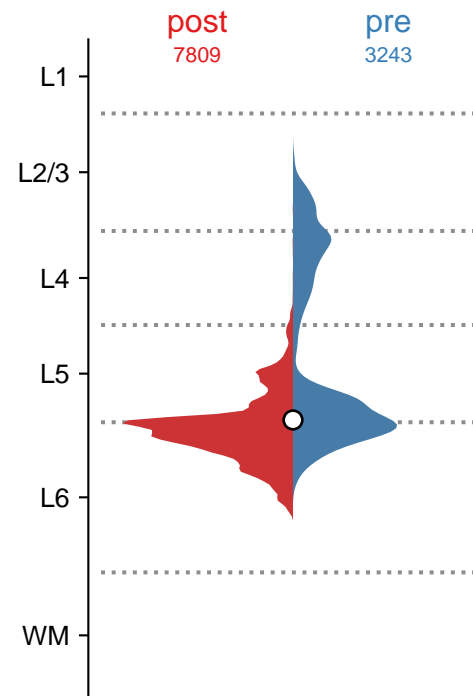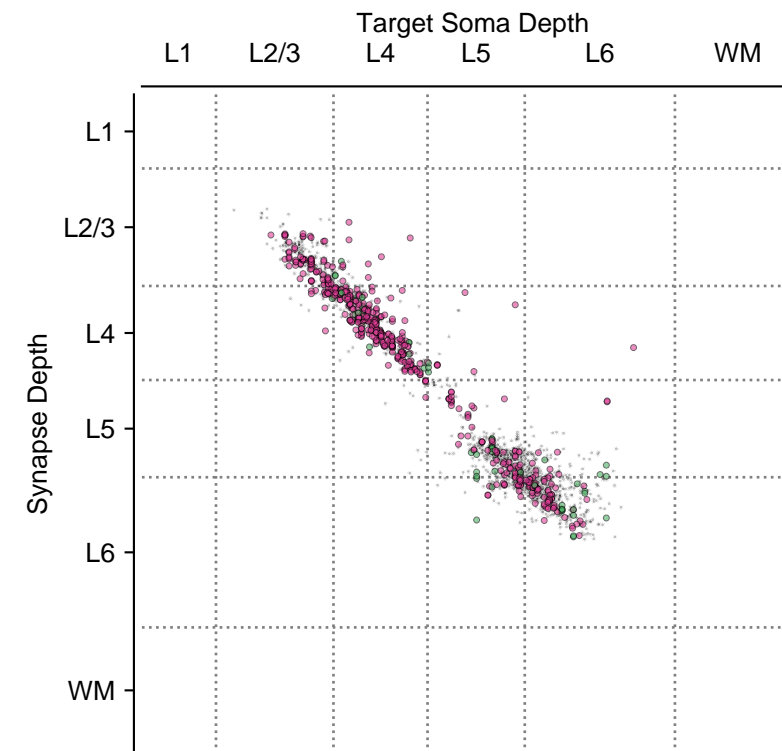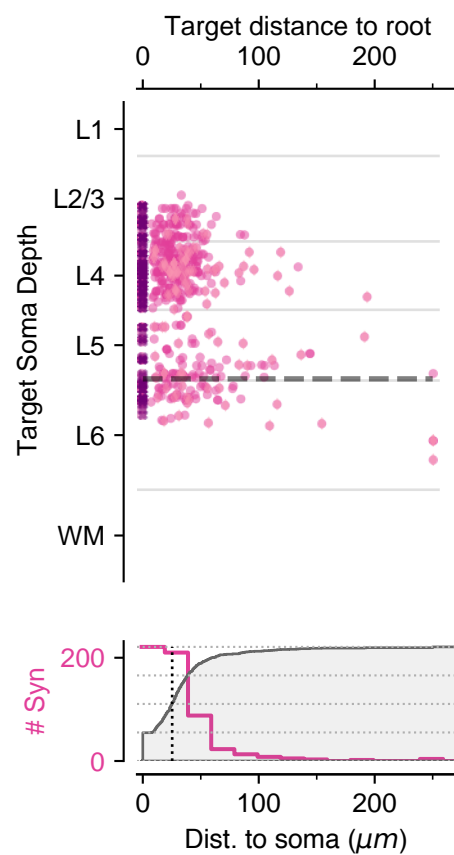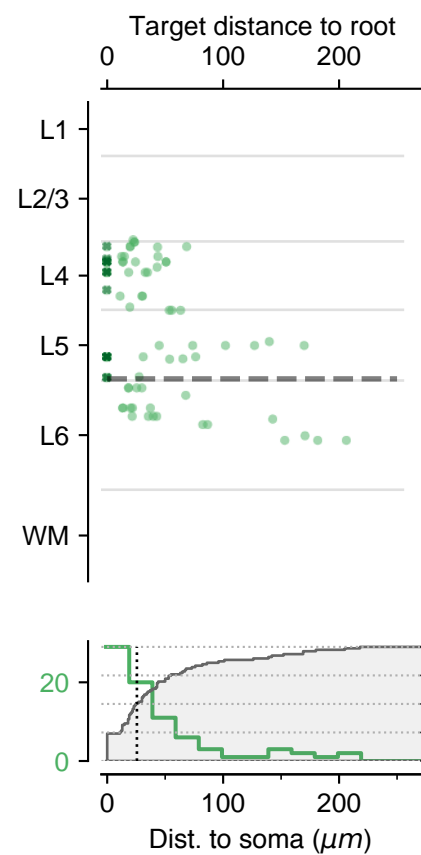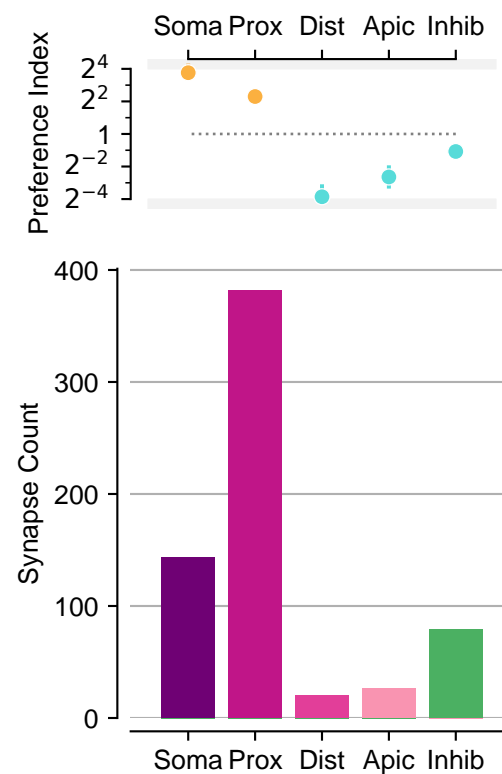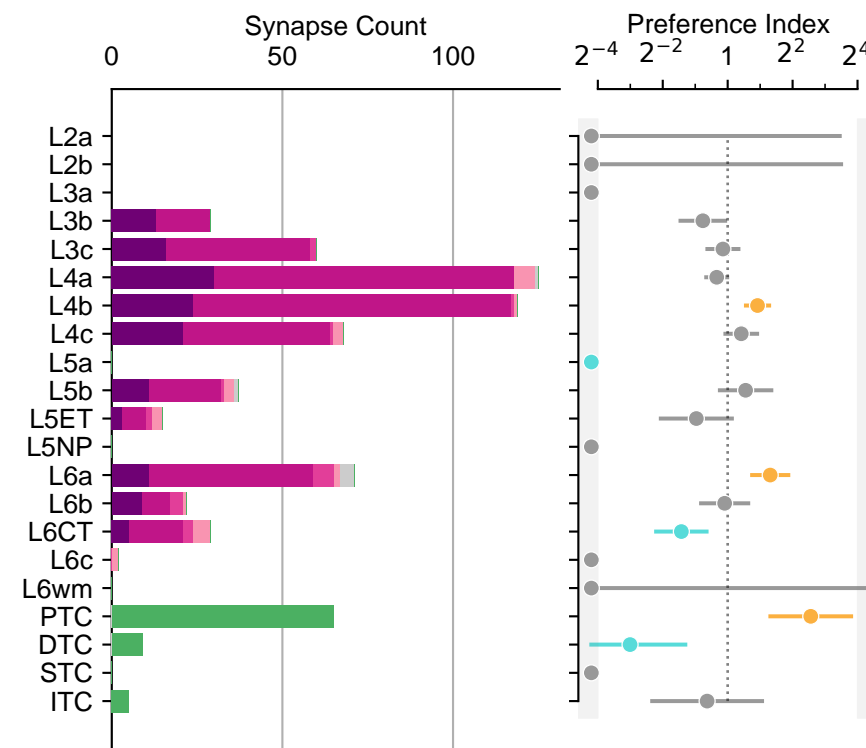

# Group 6

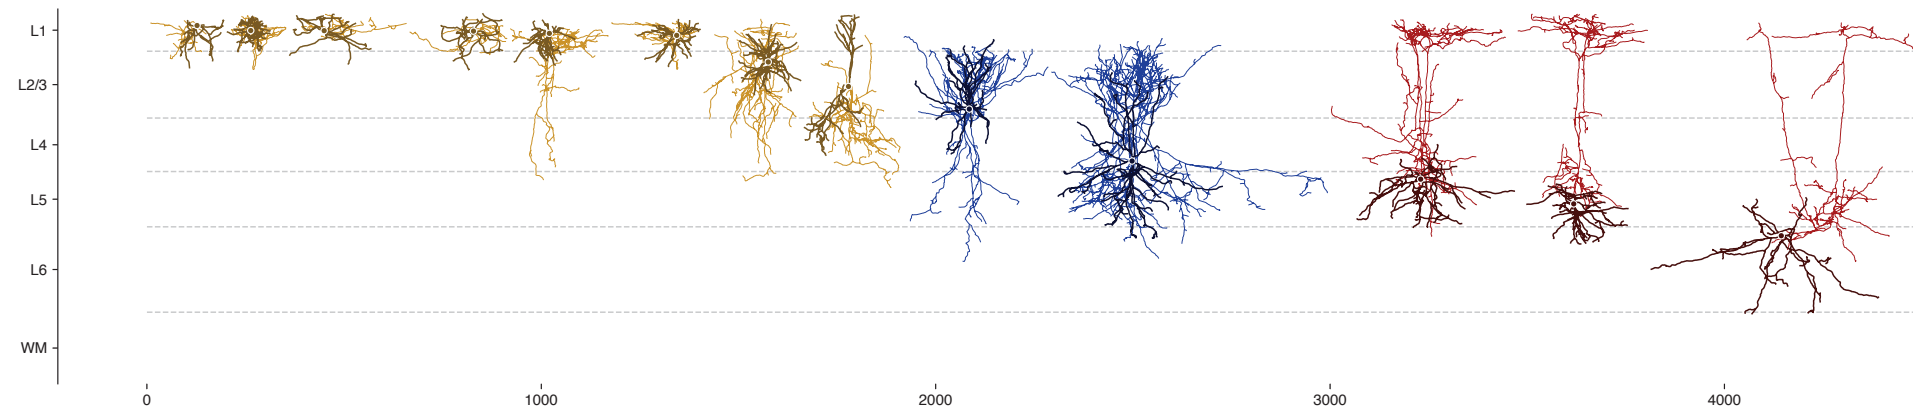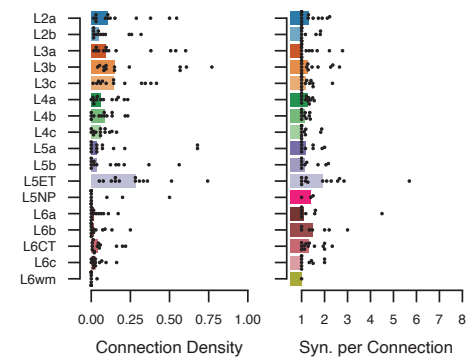

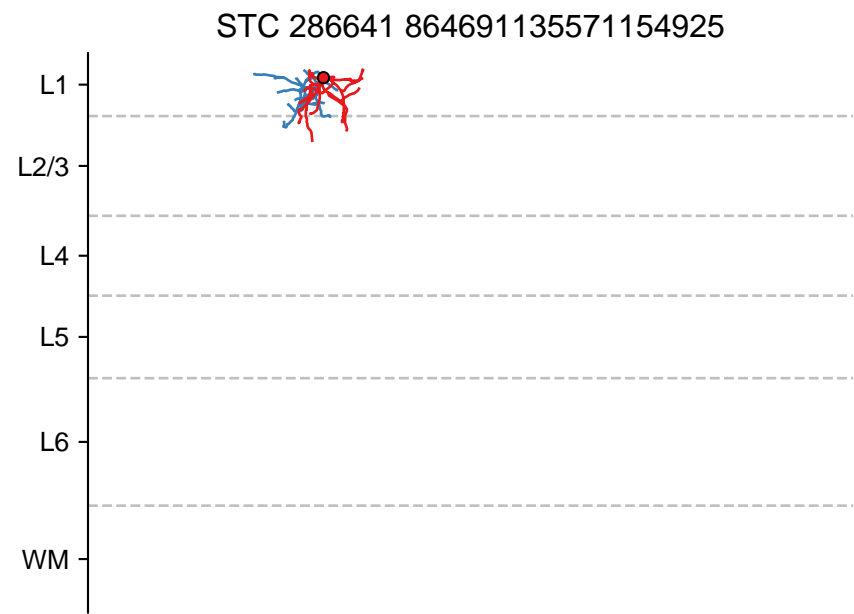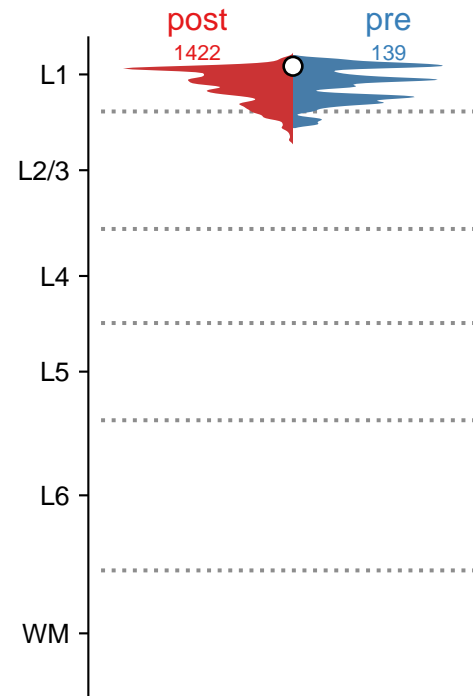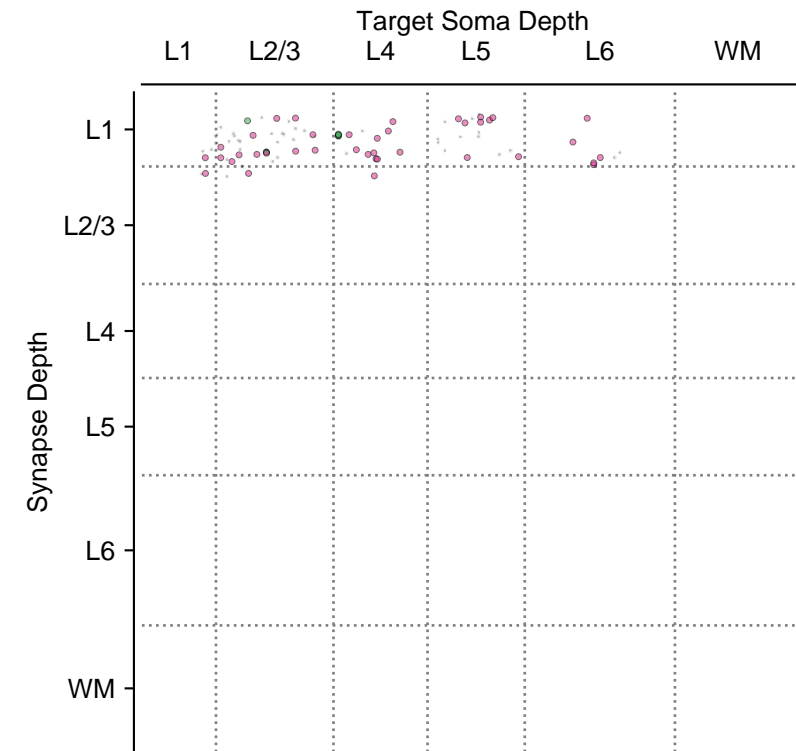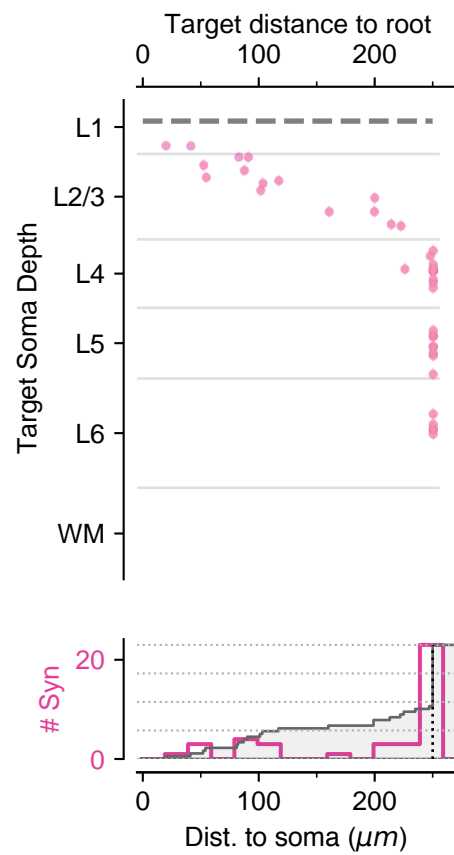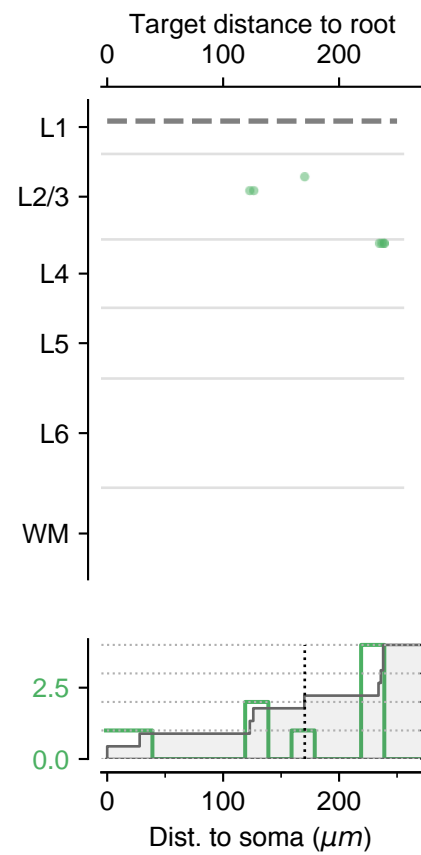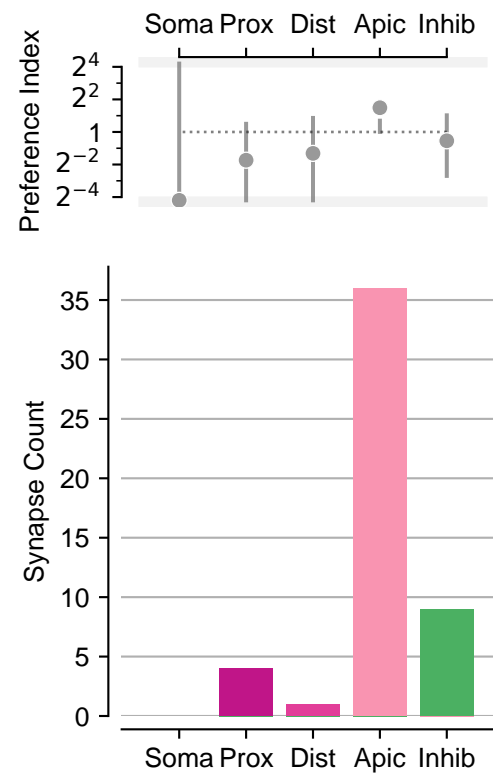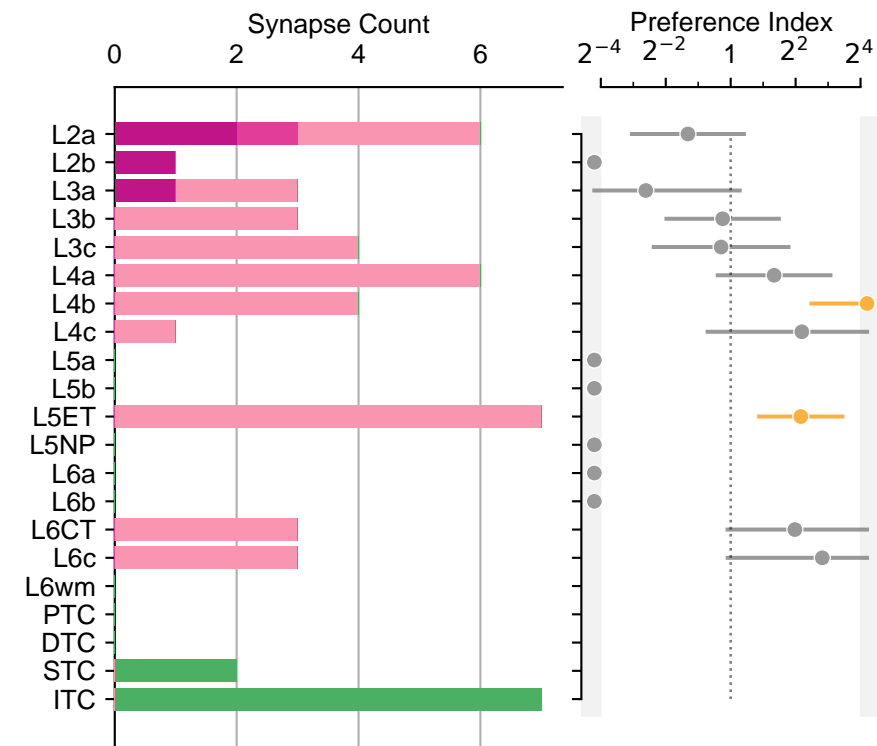

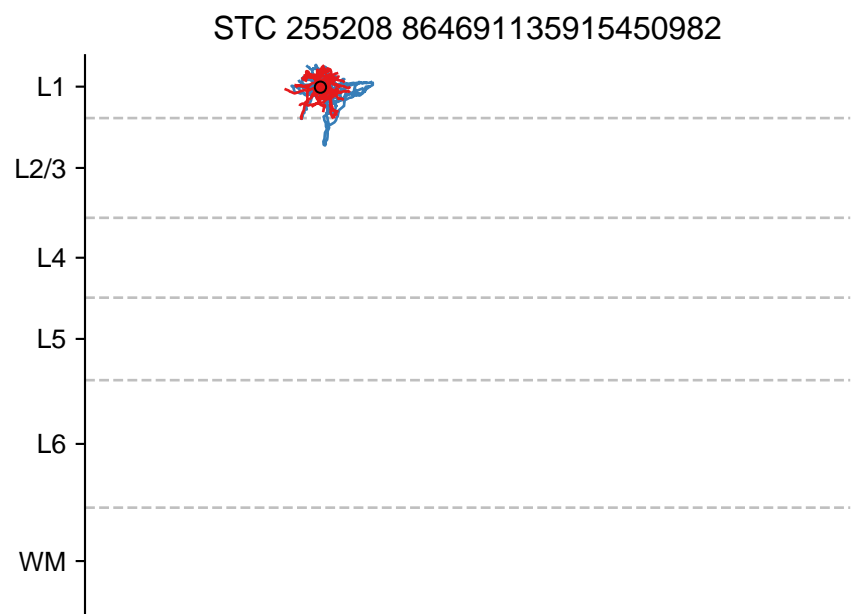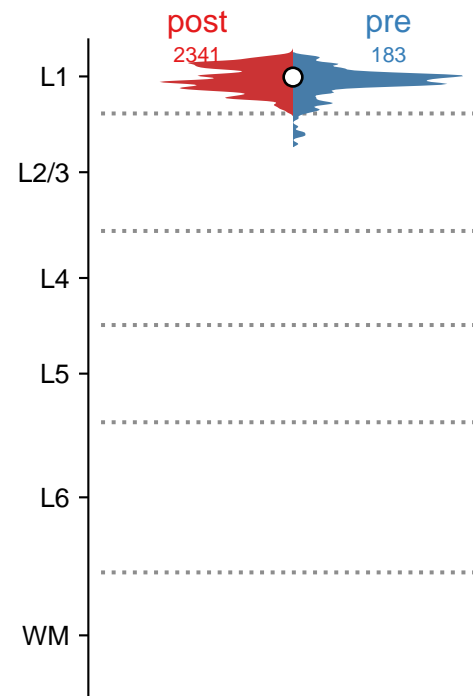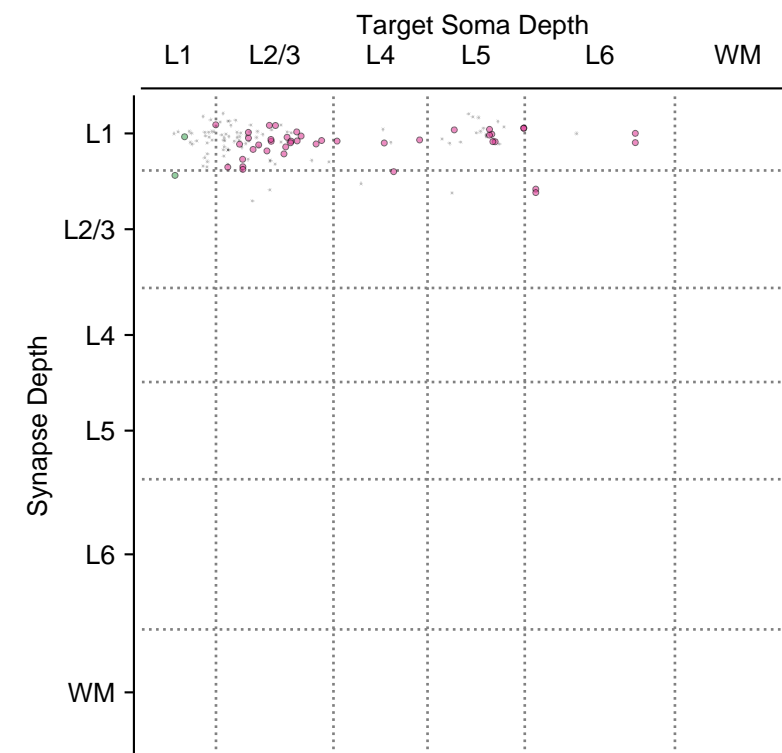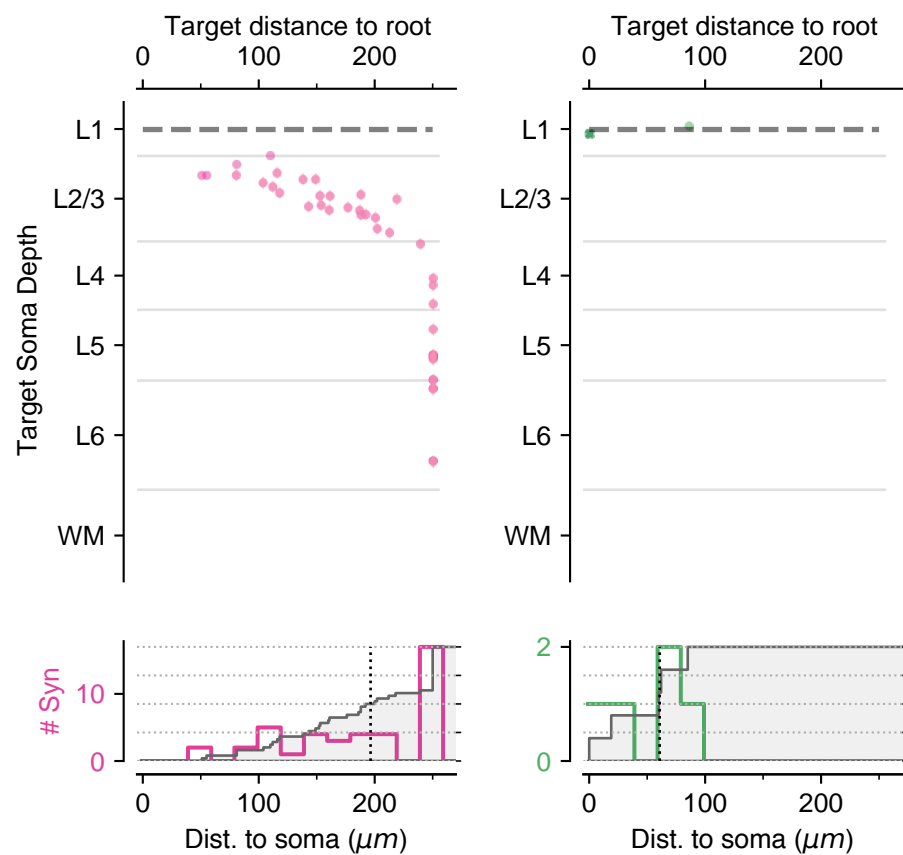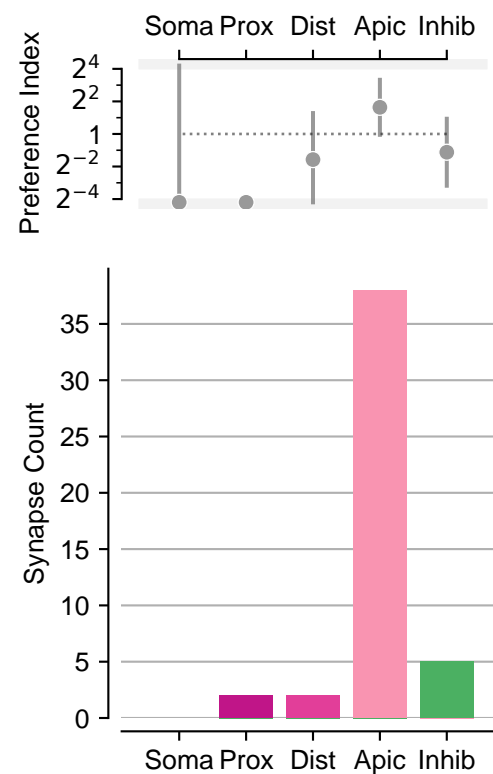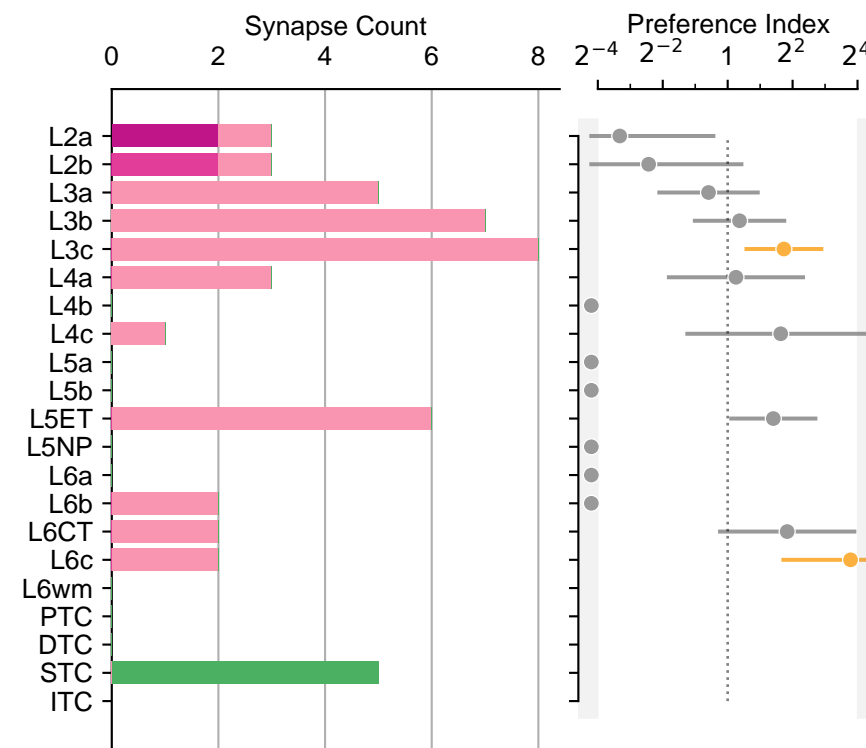

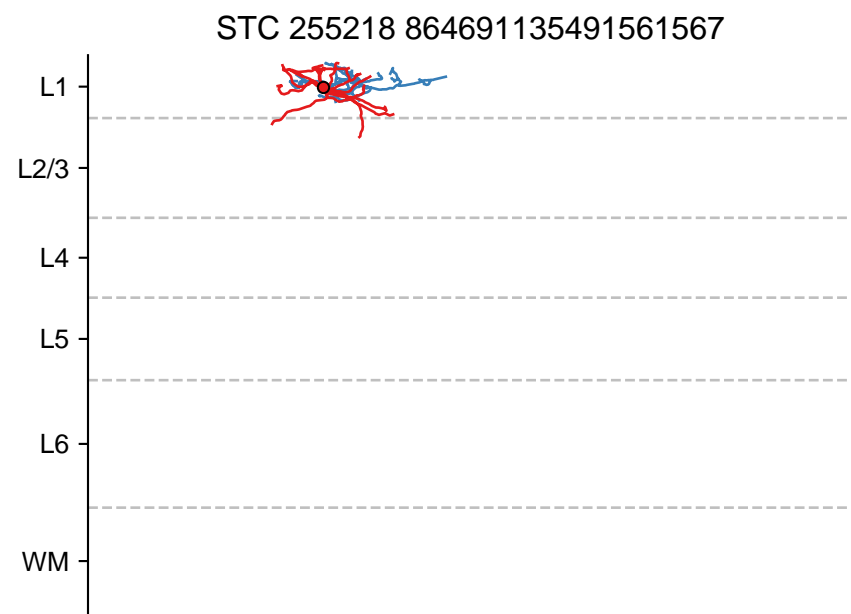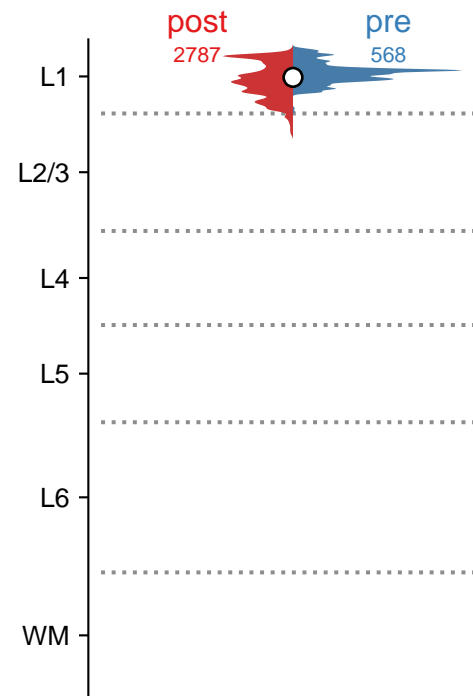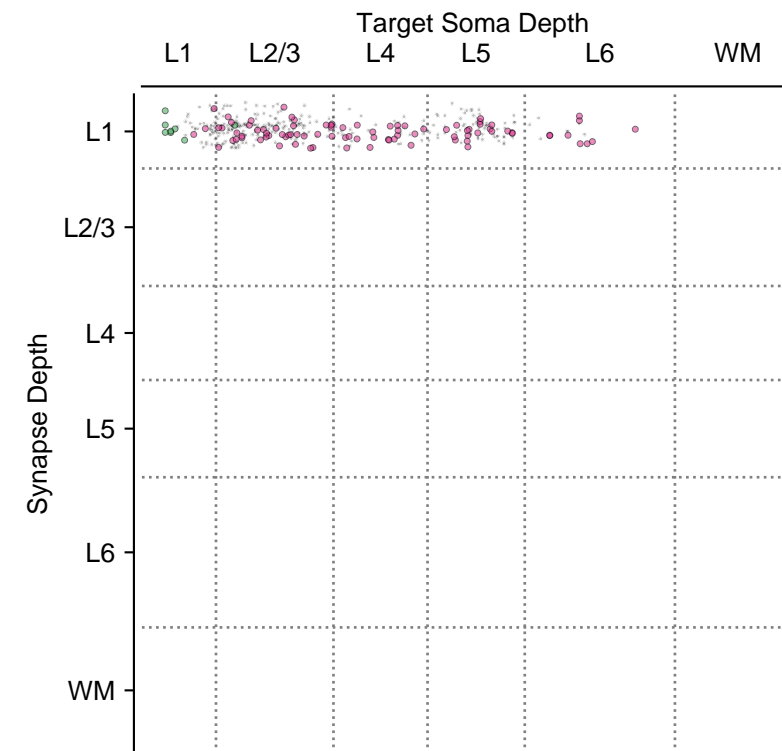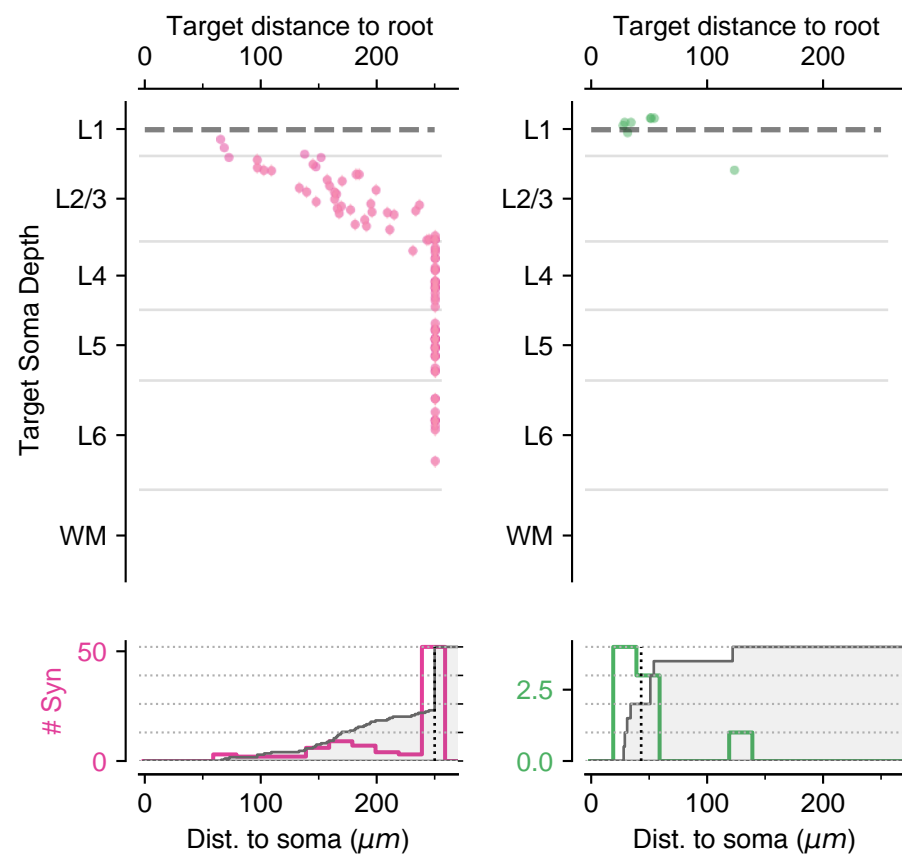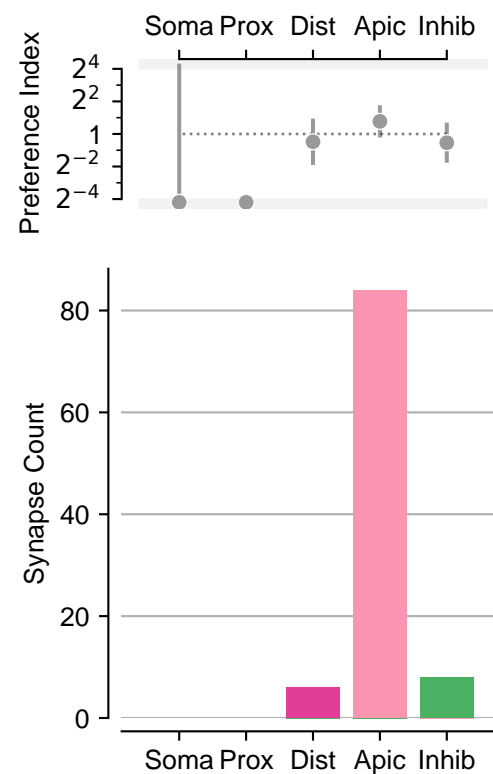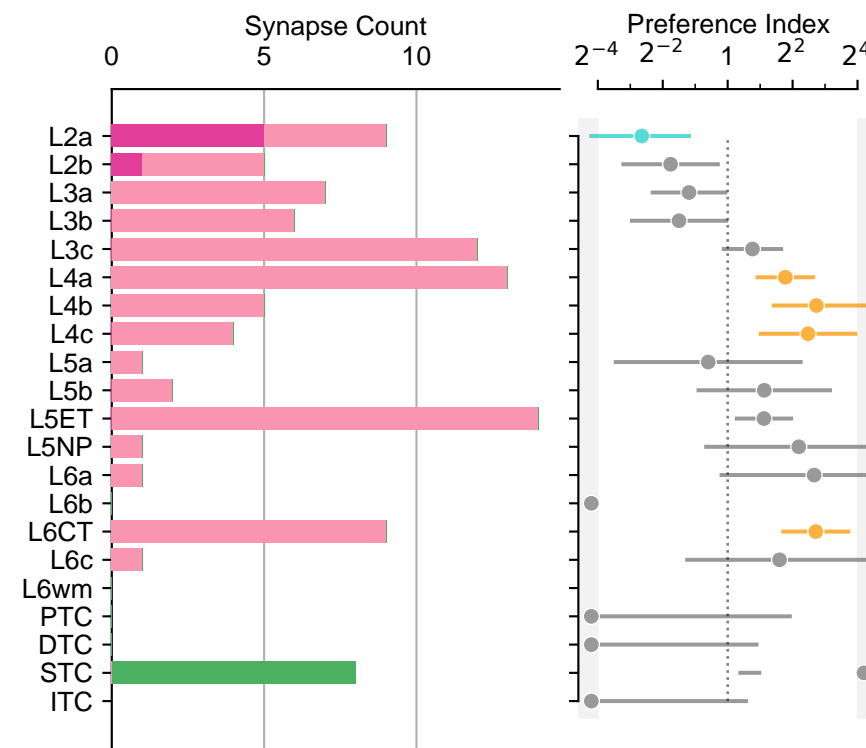



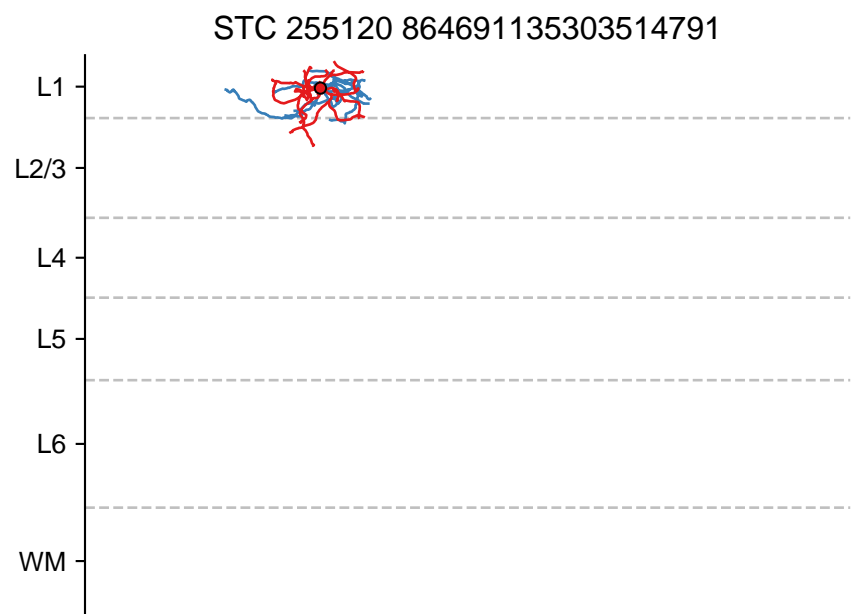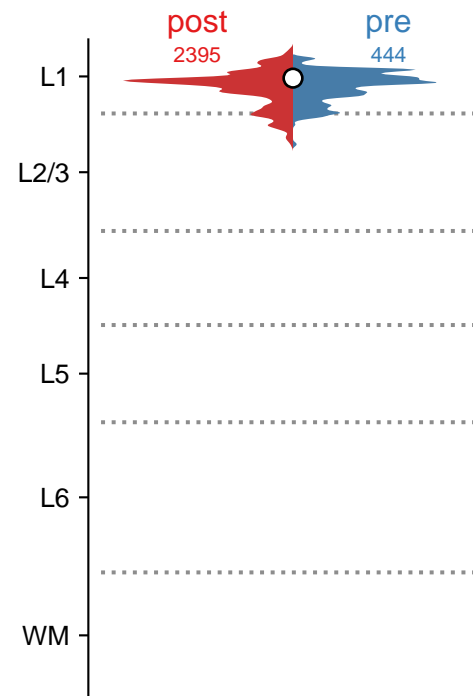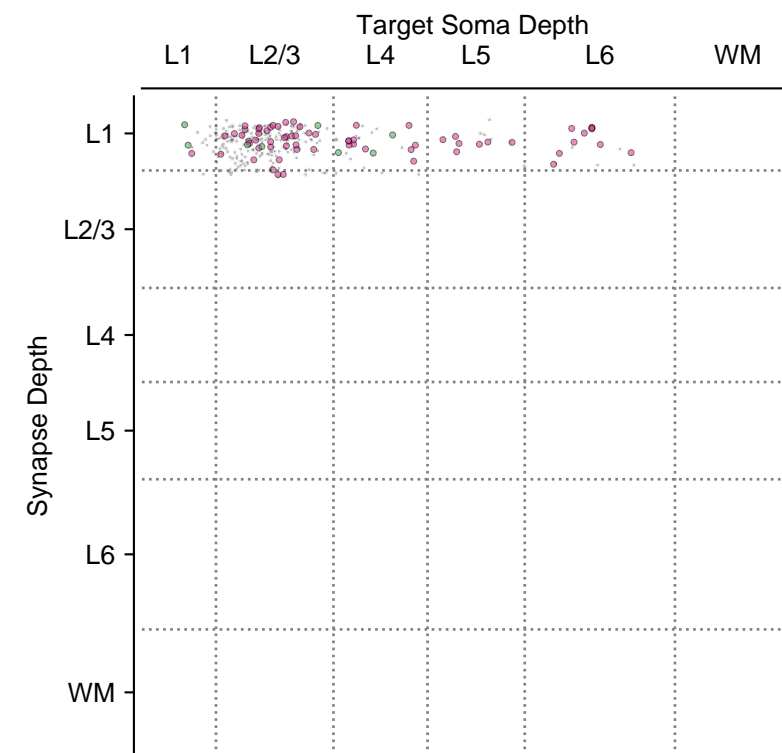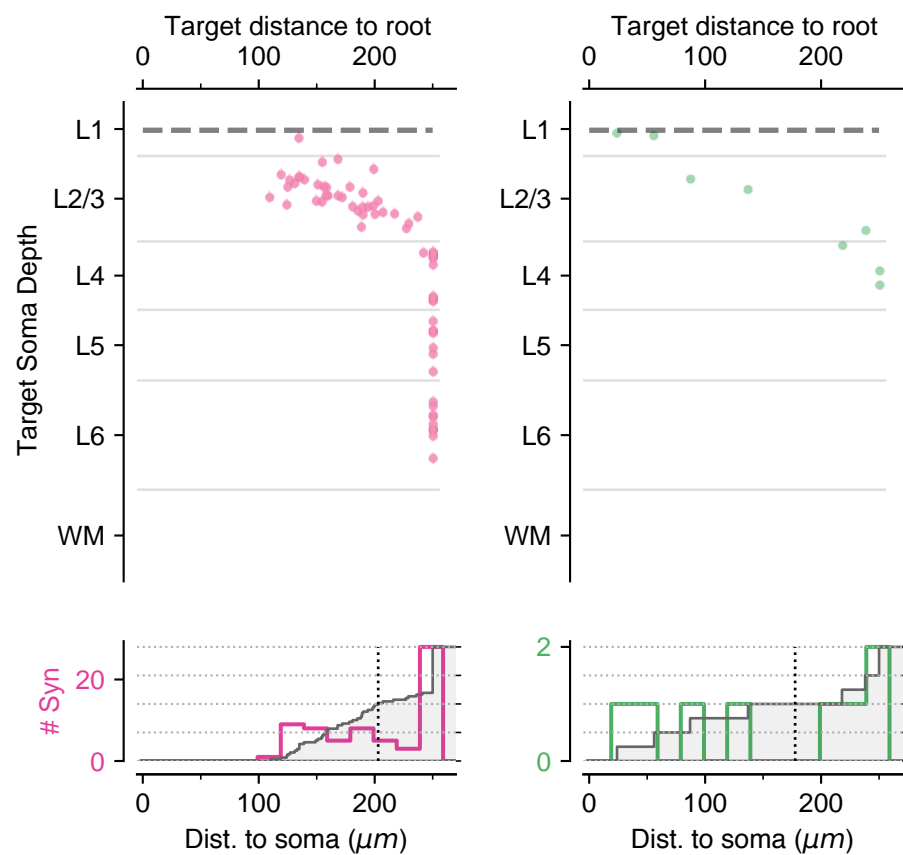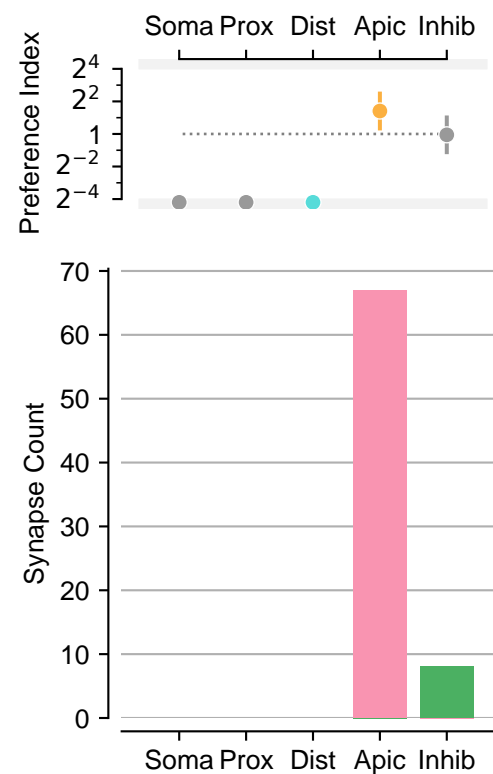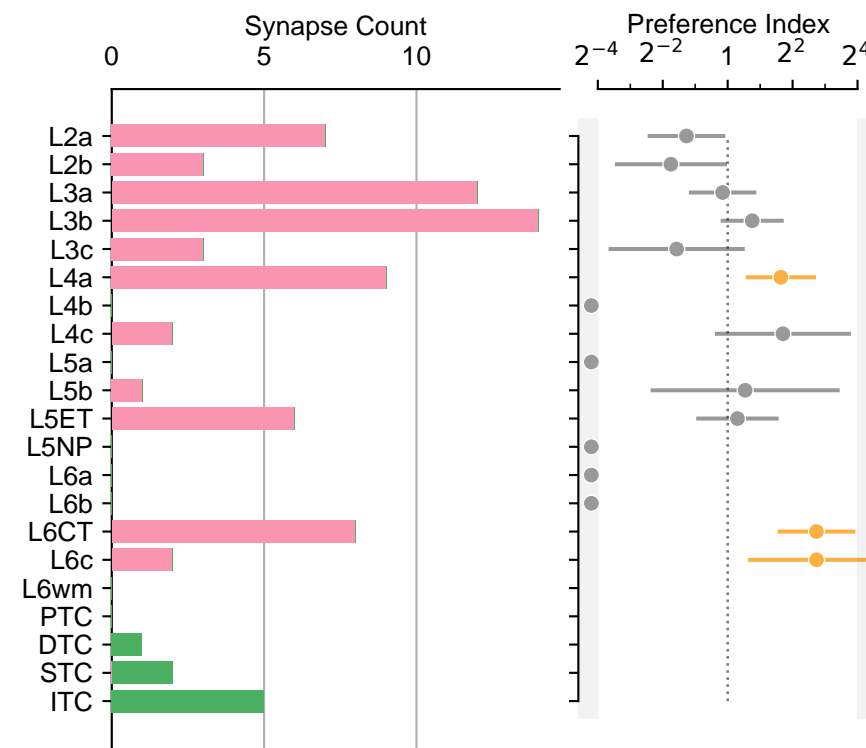

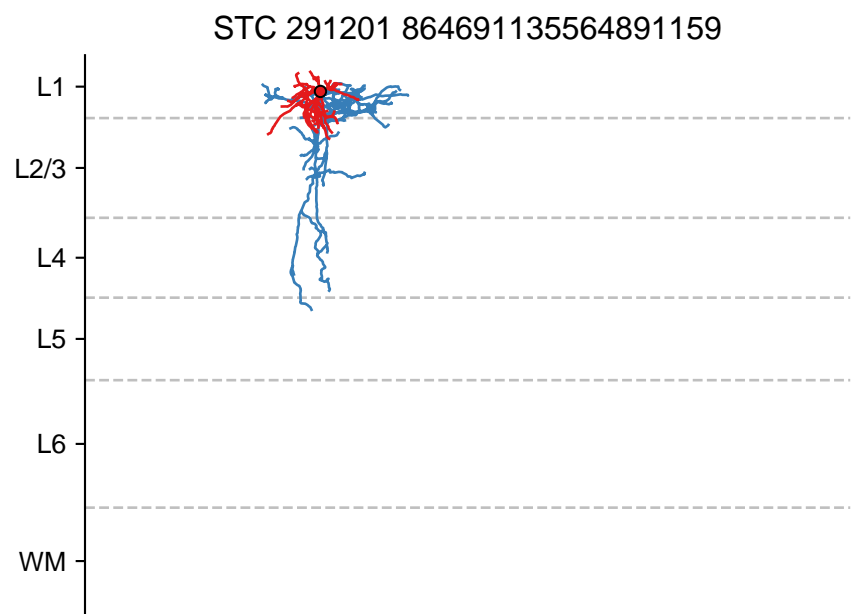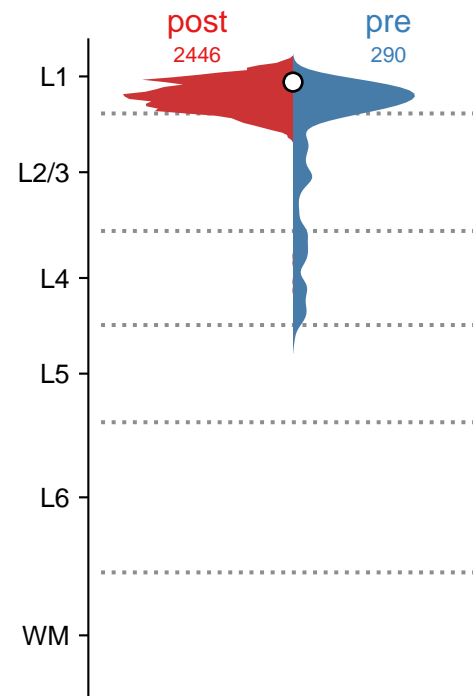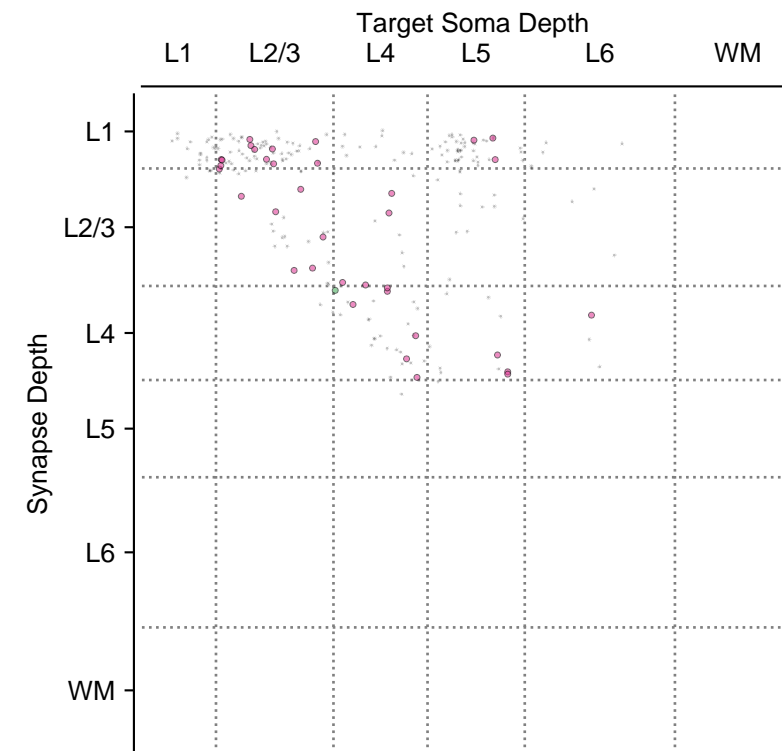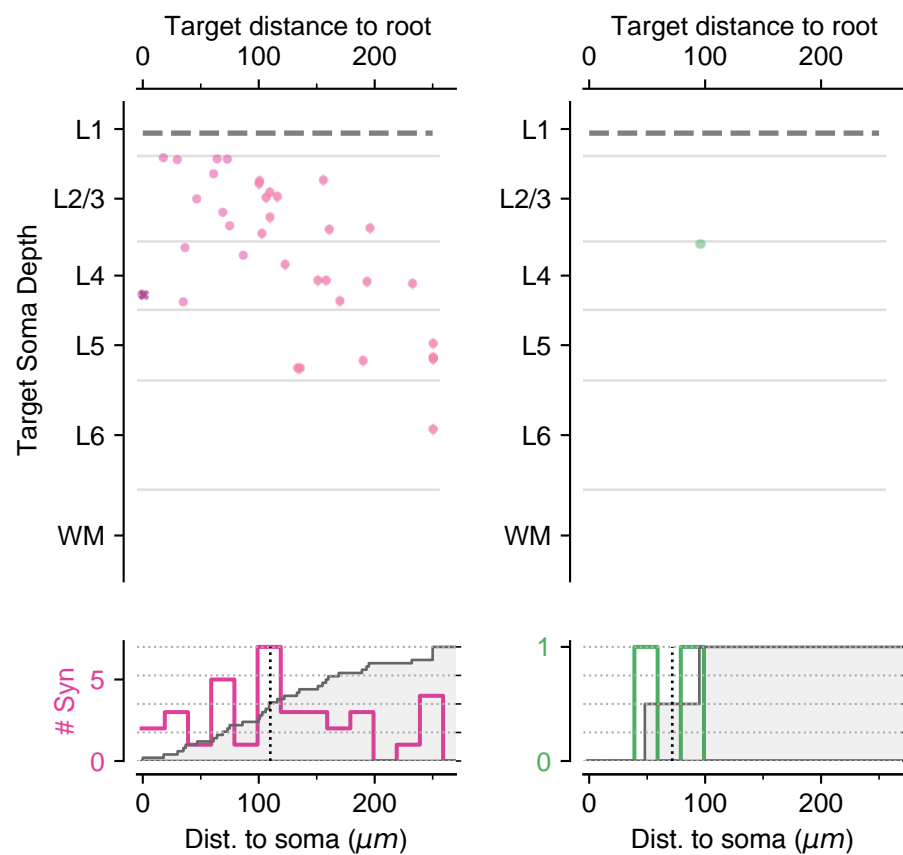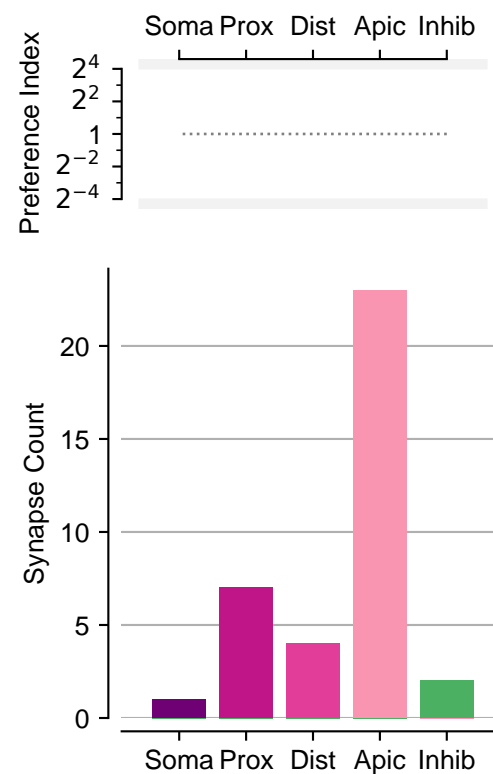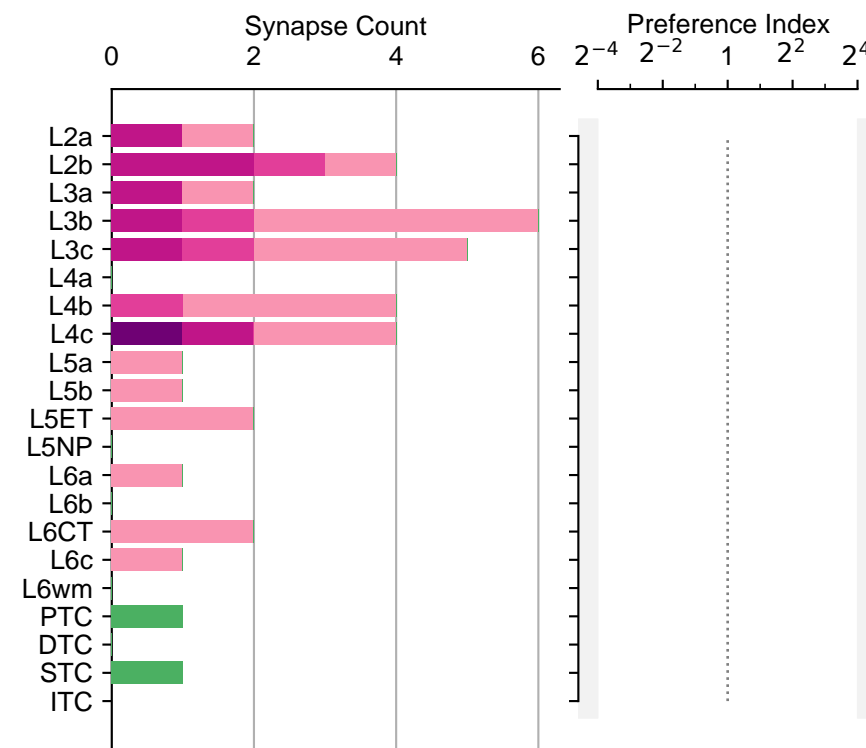

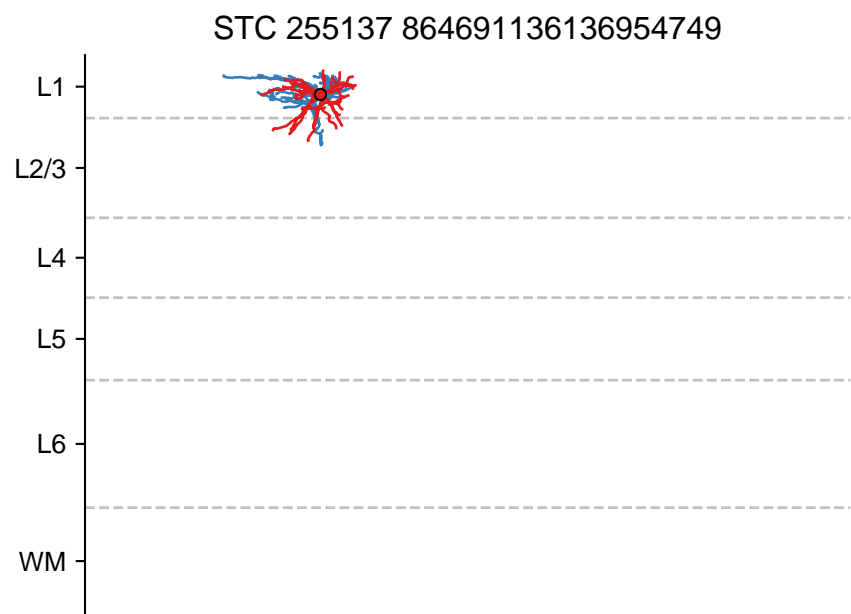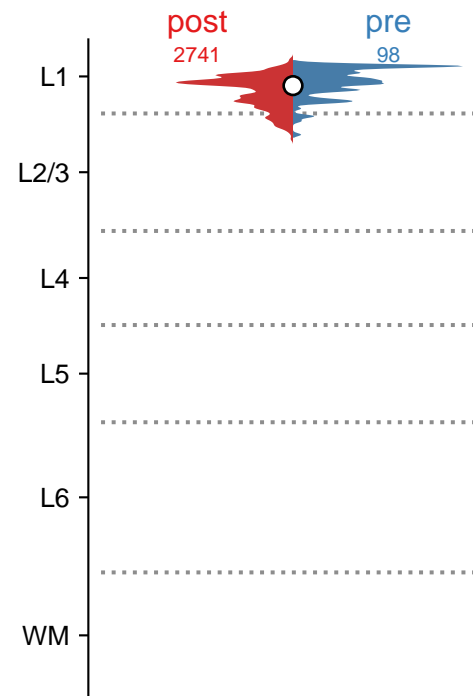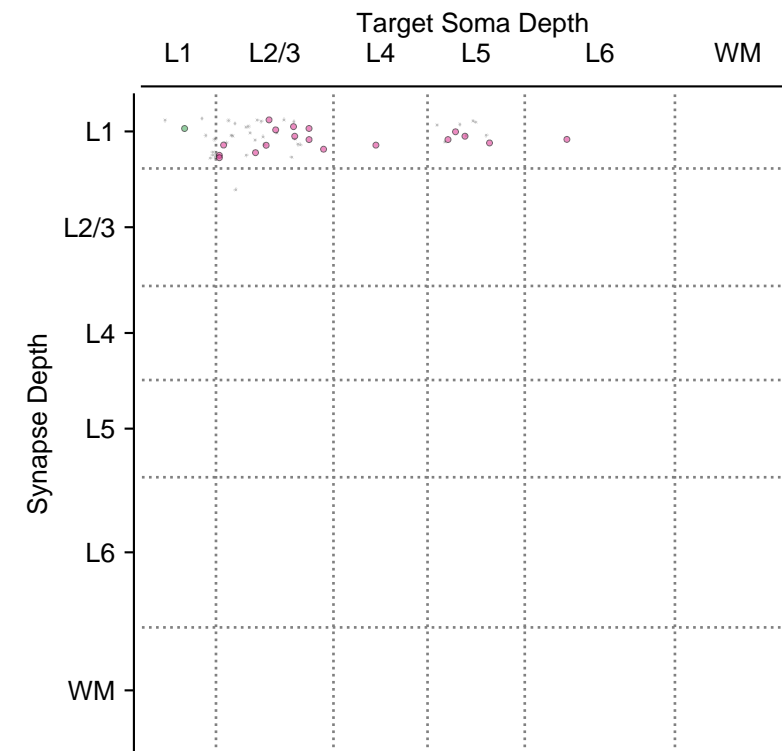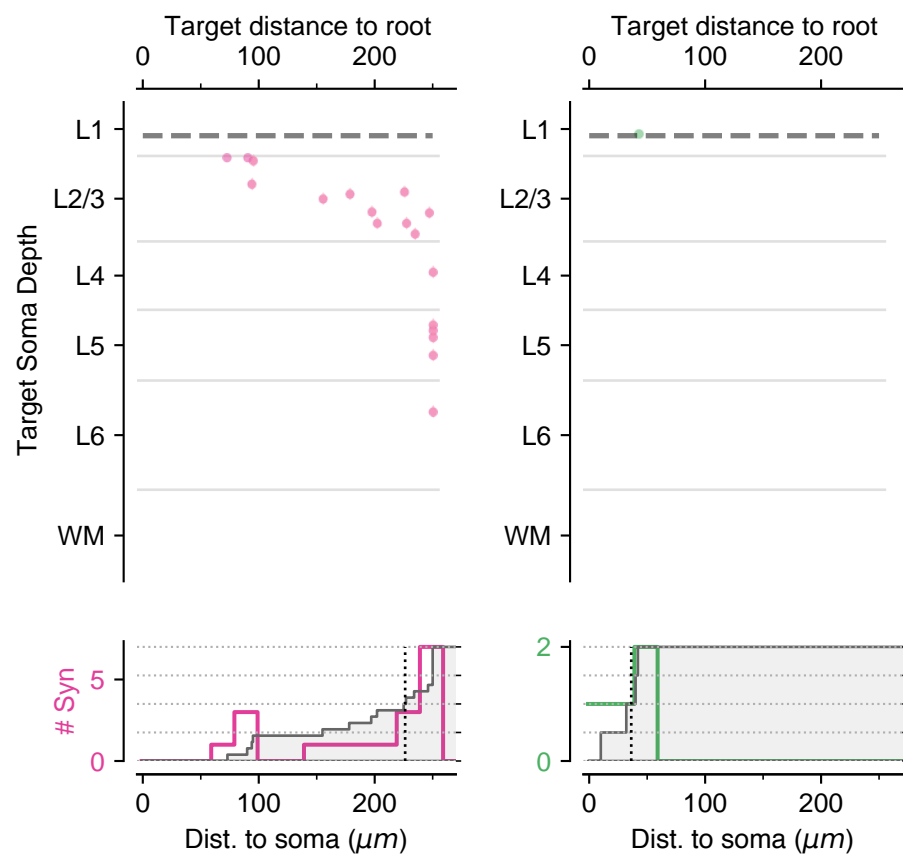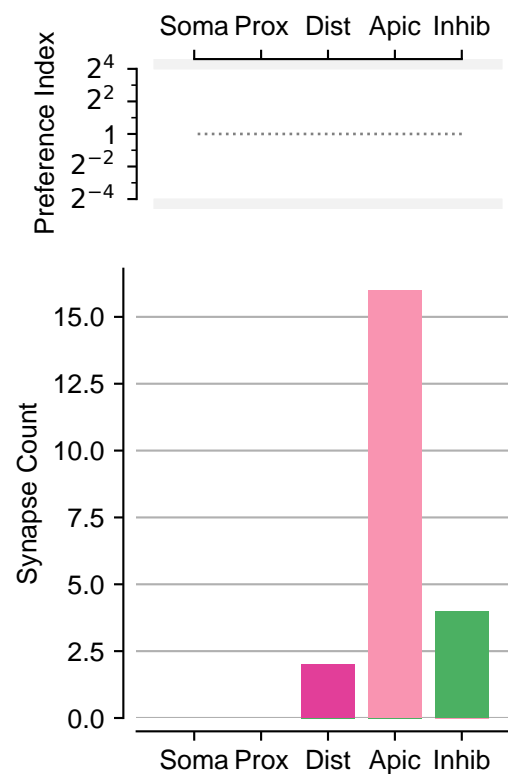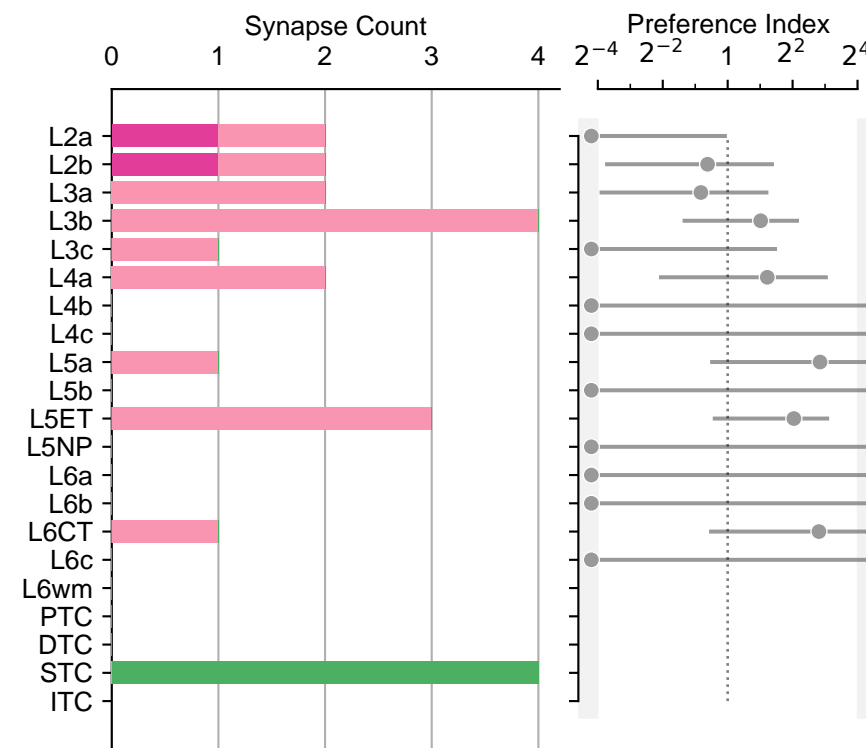

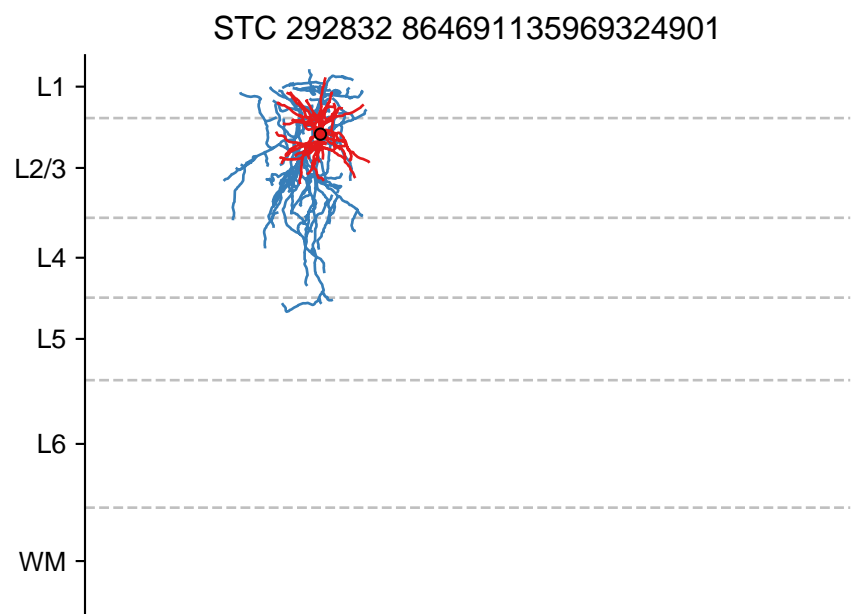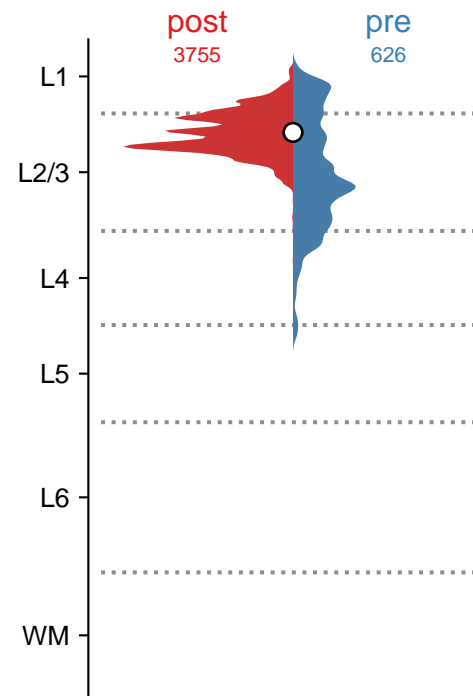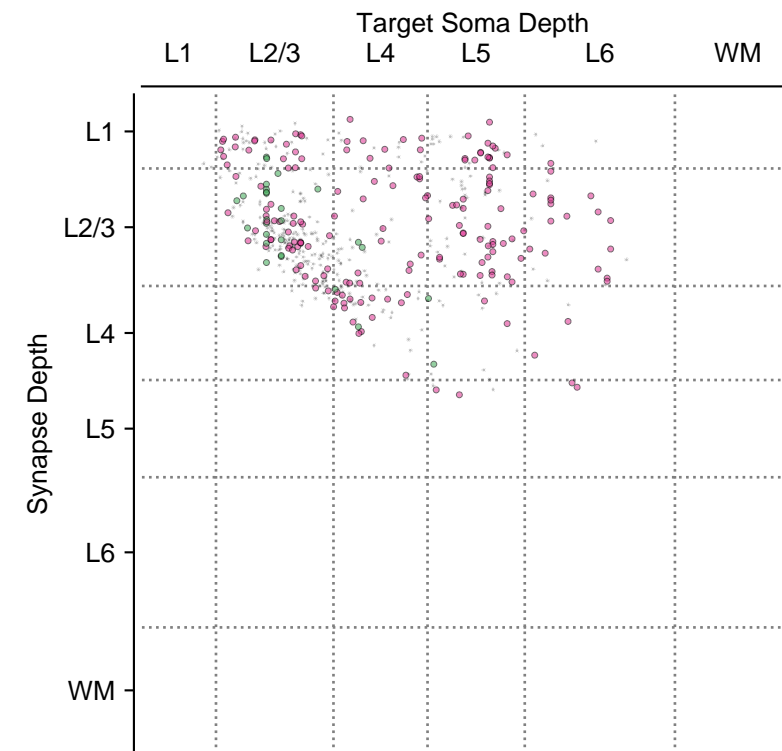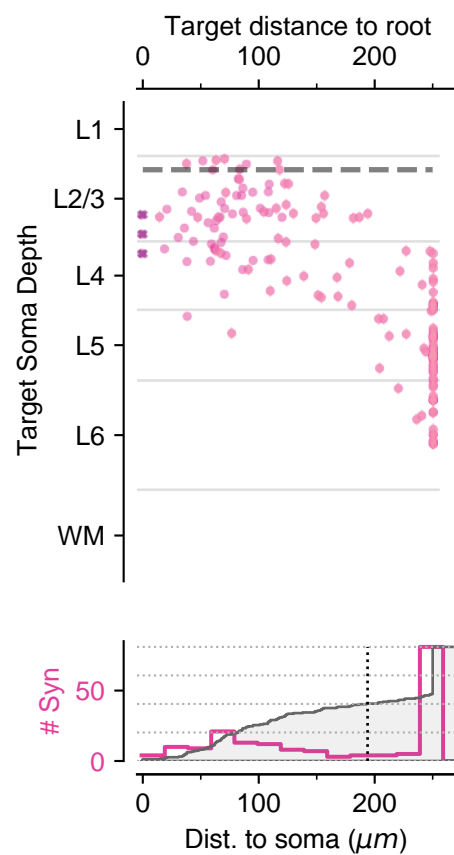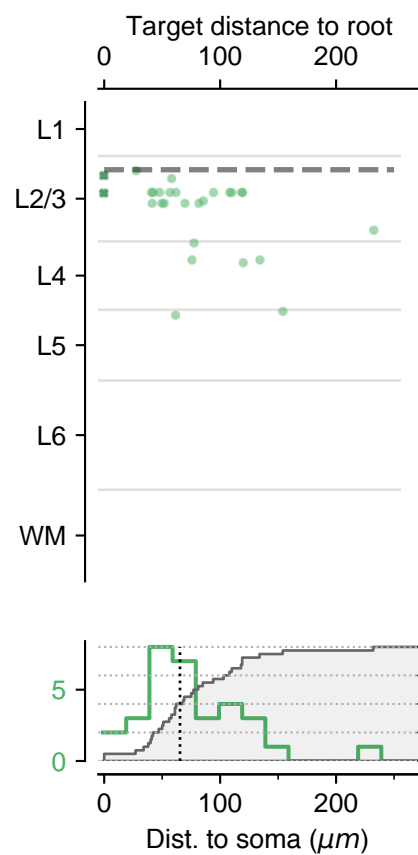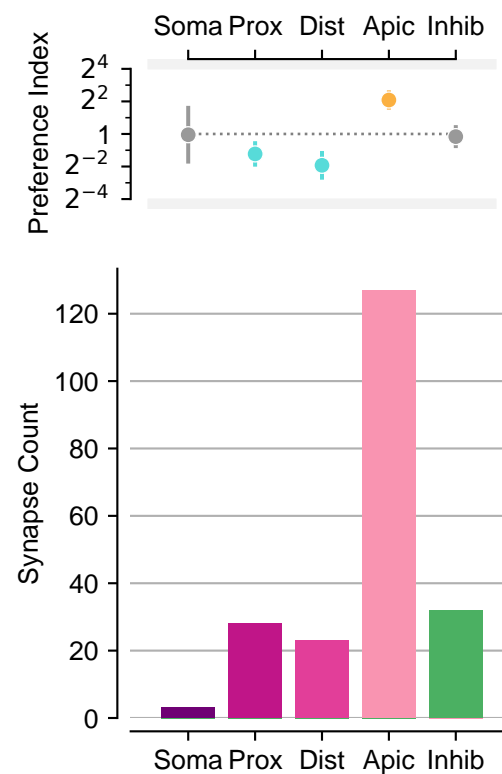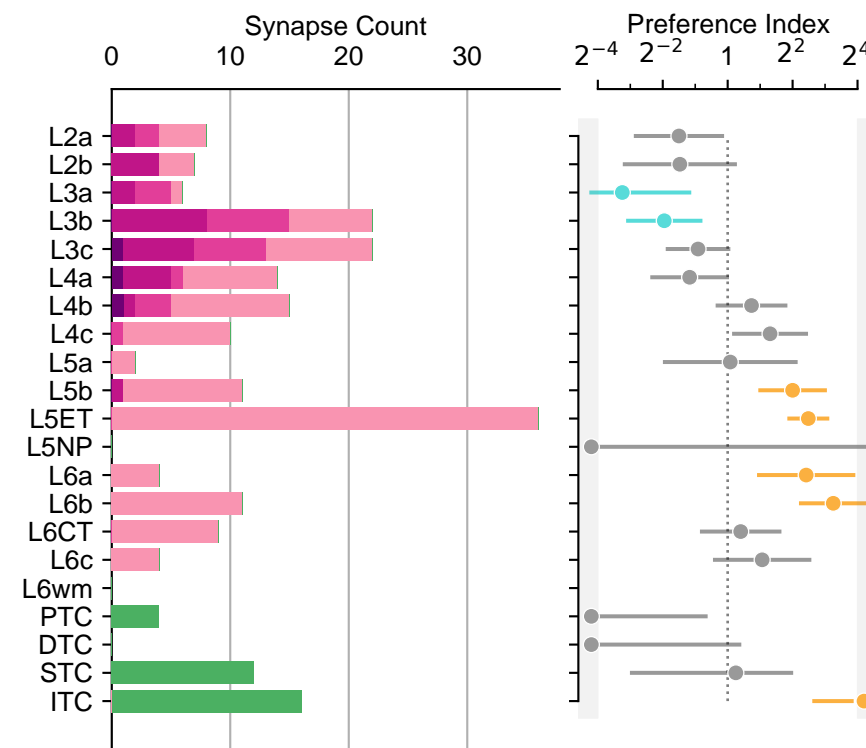

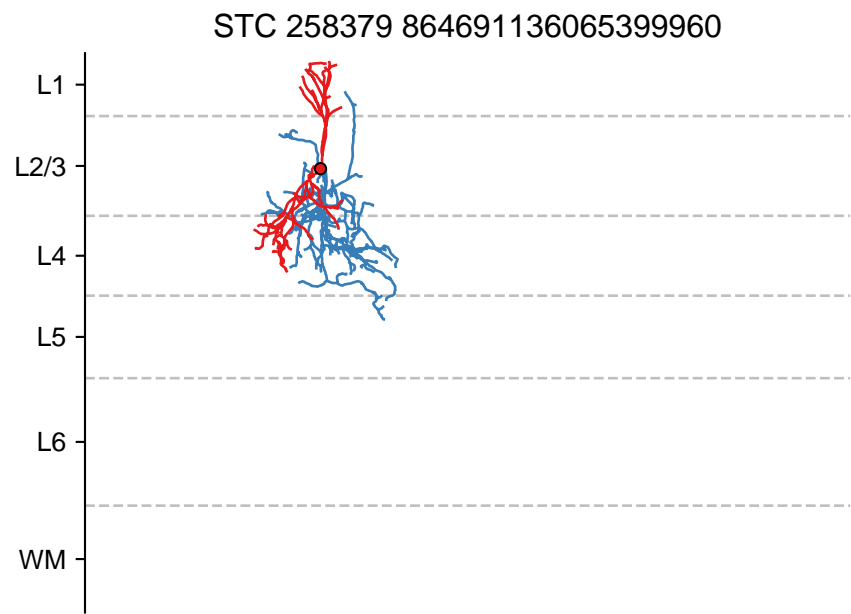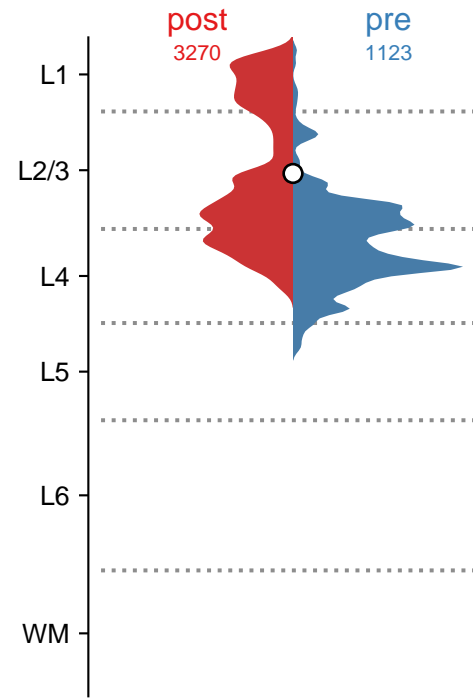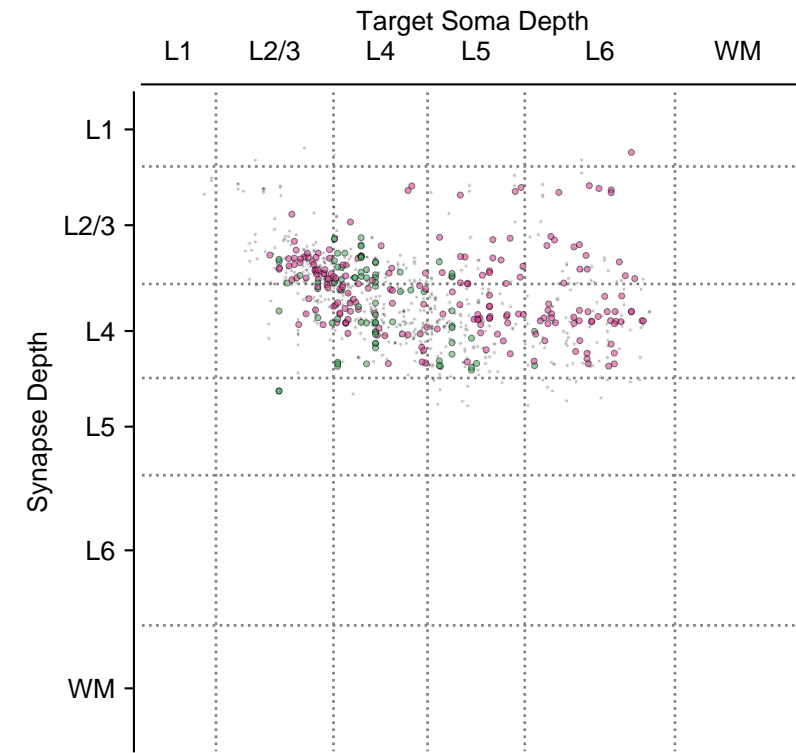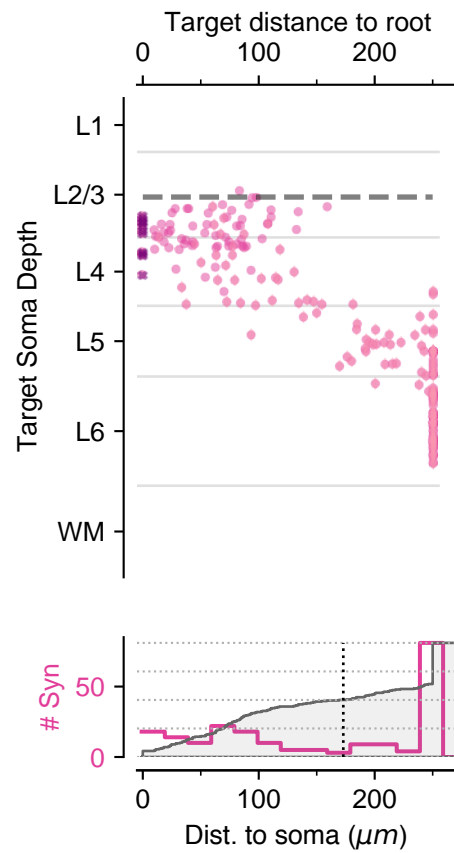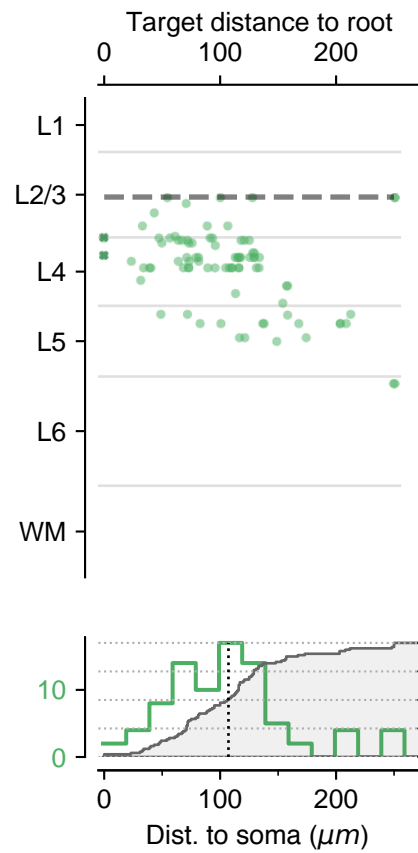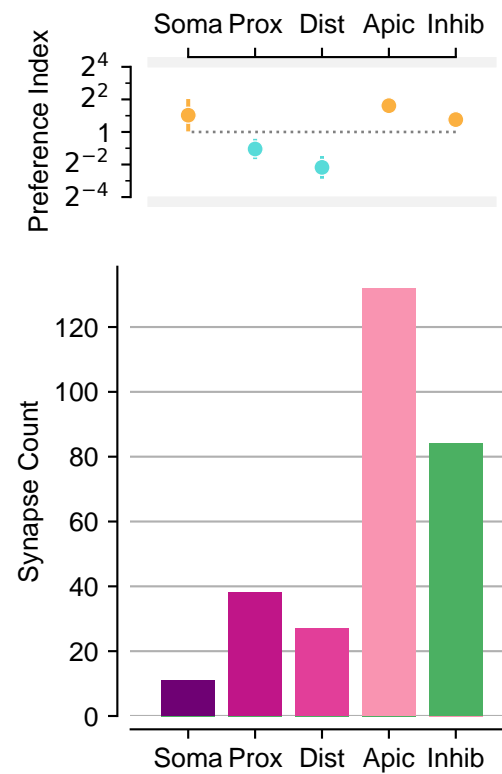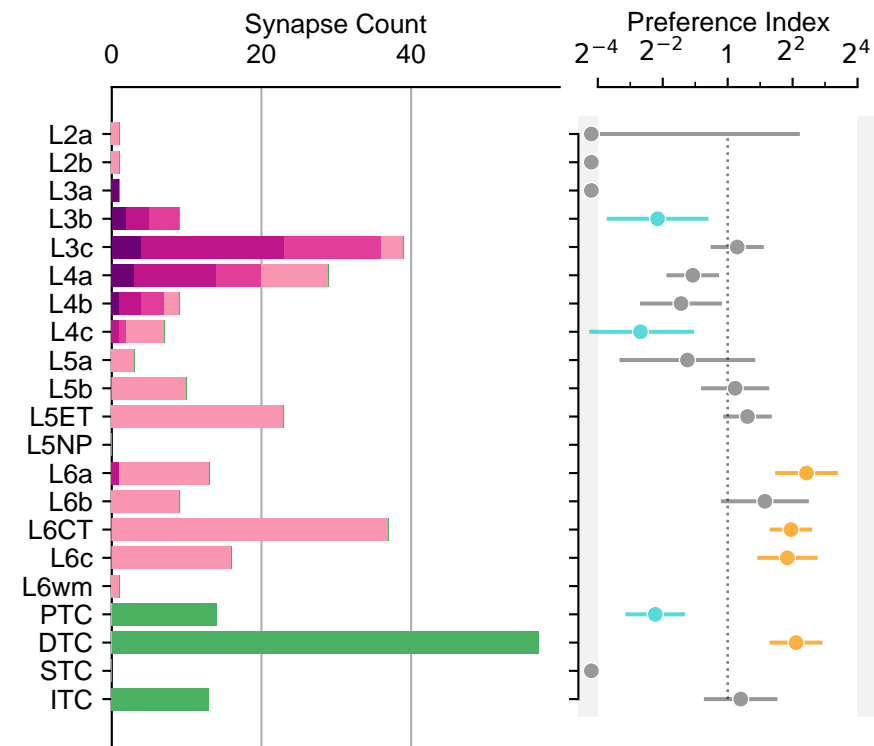

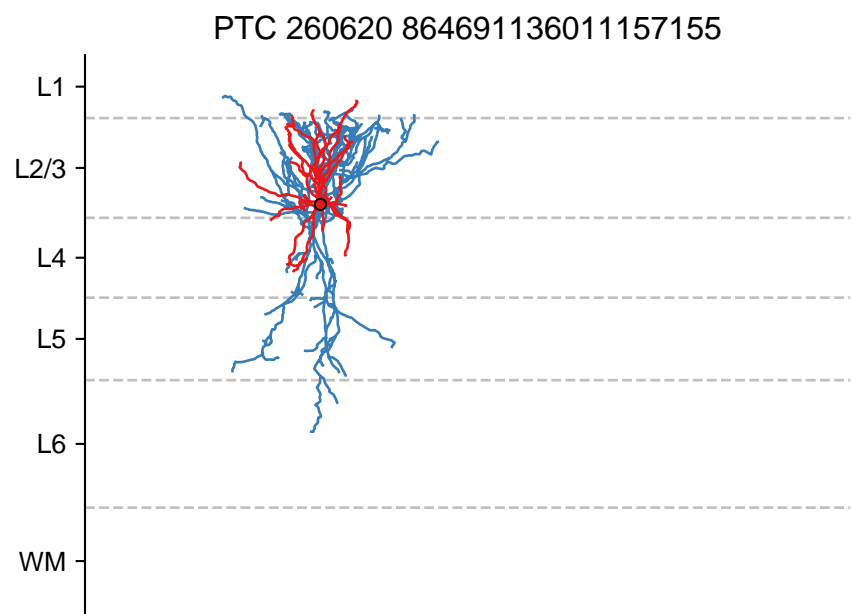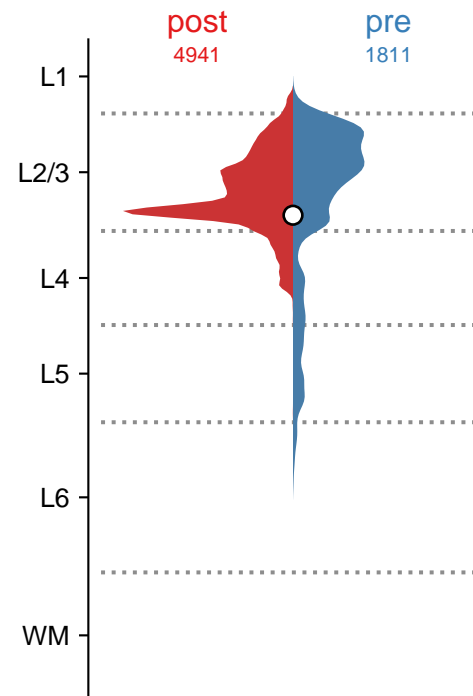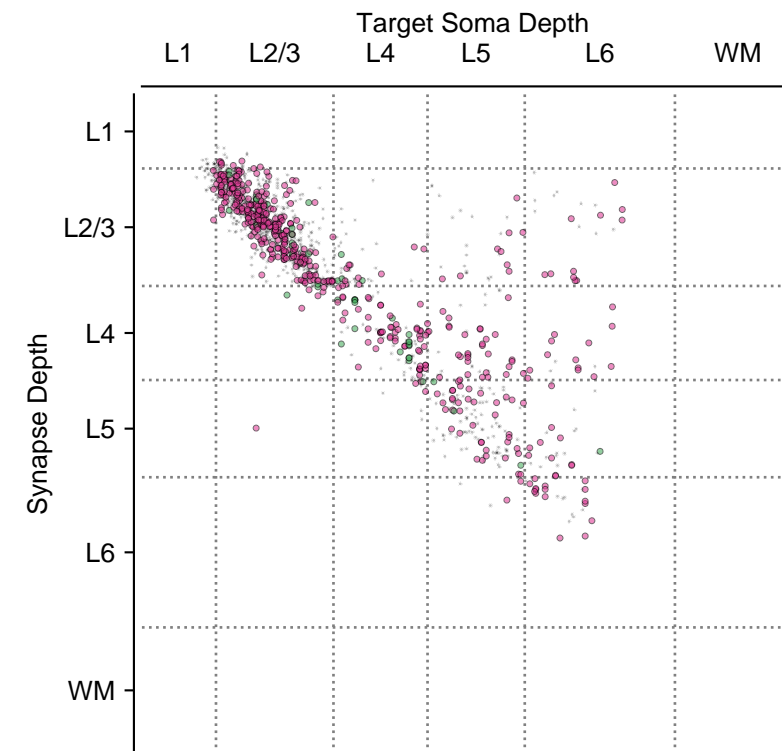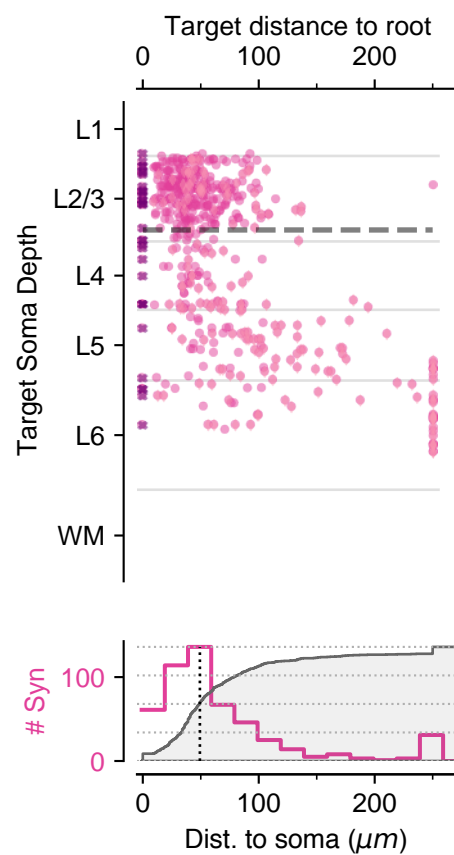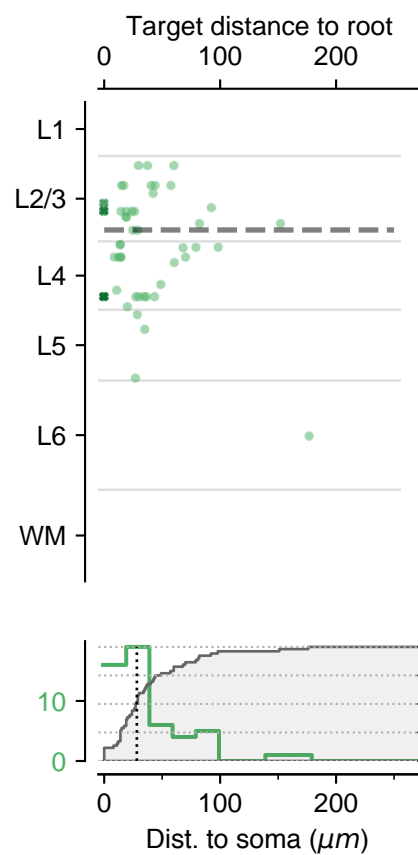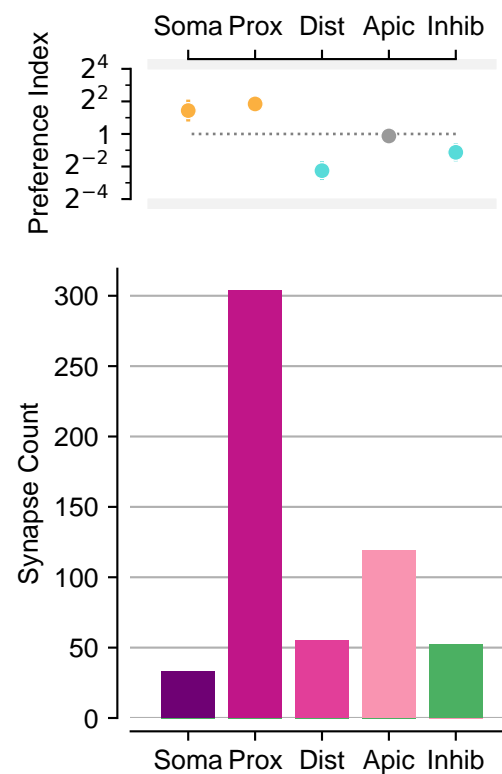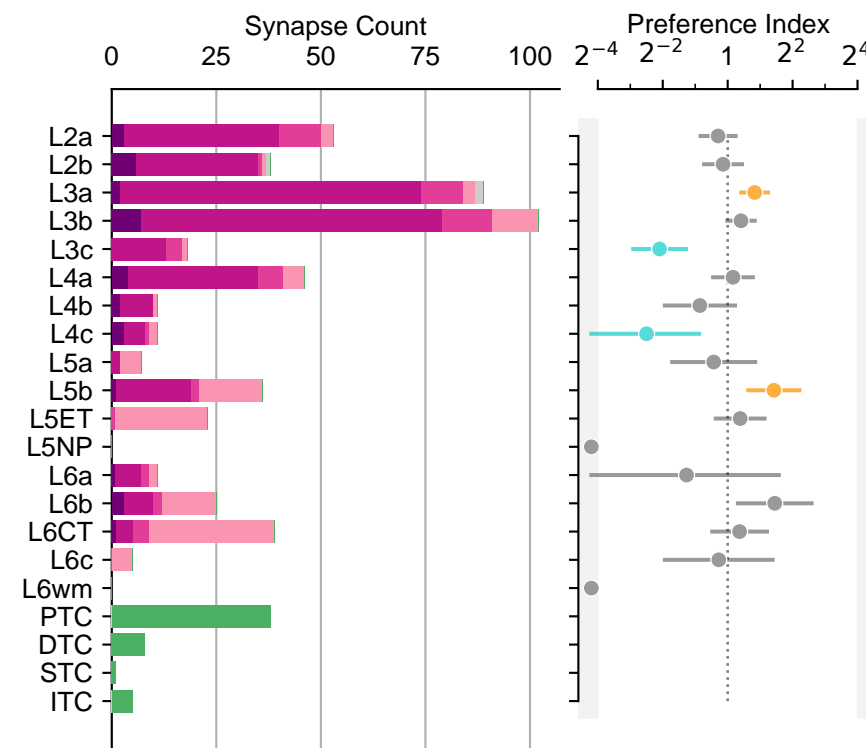

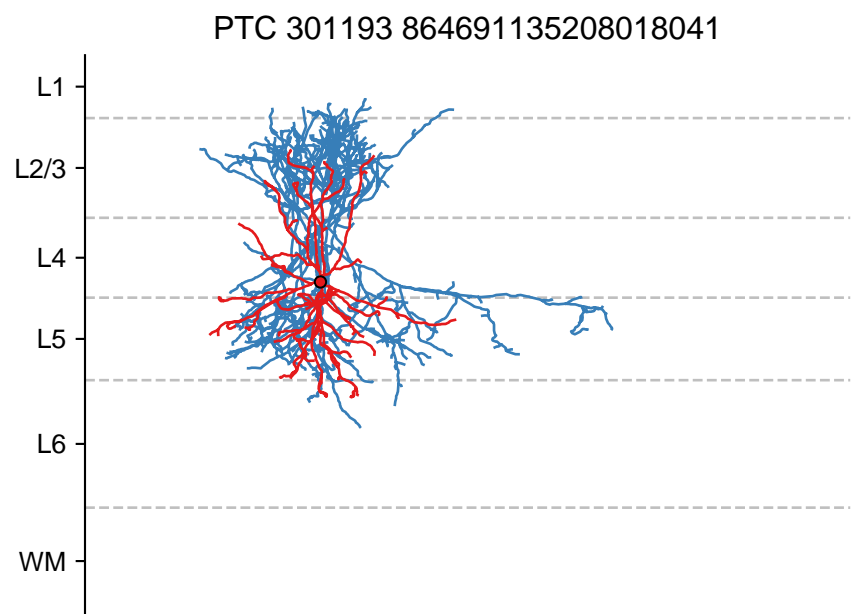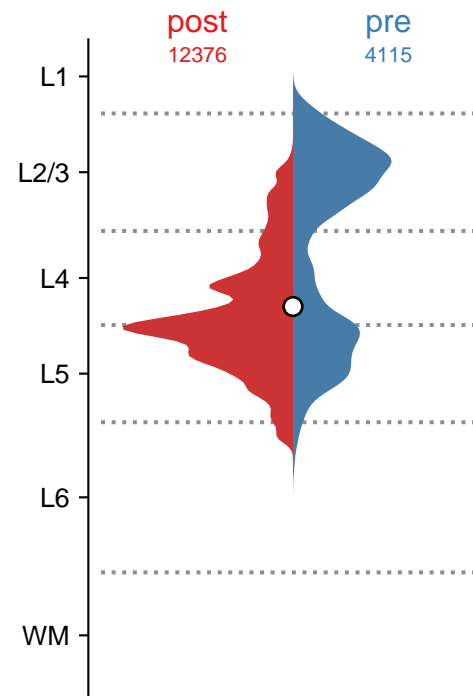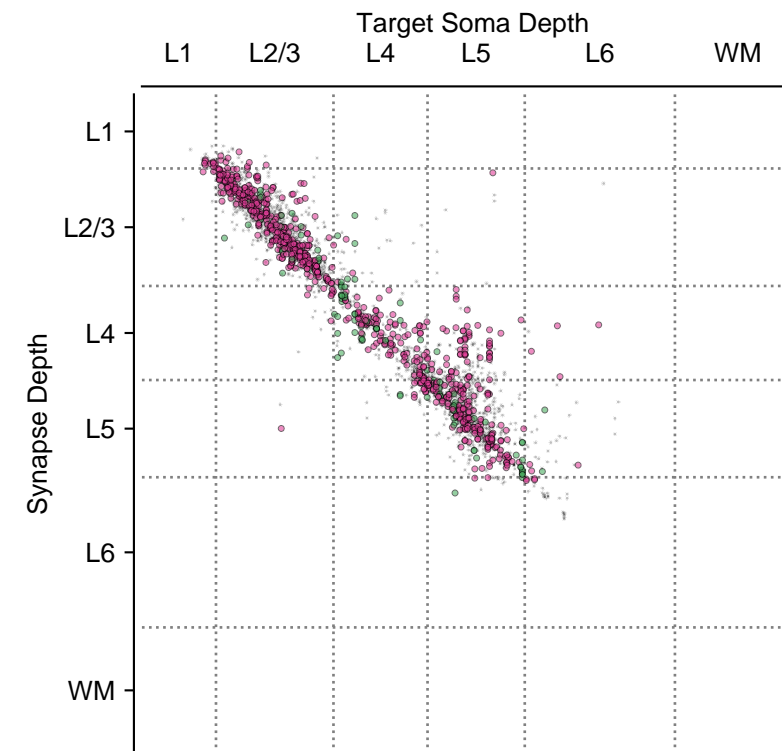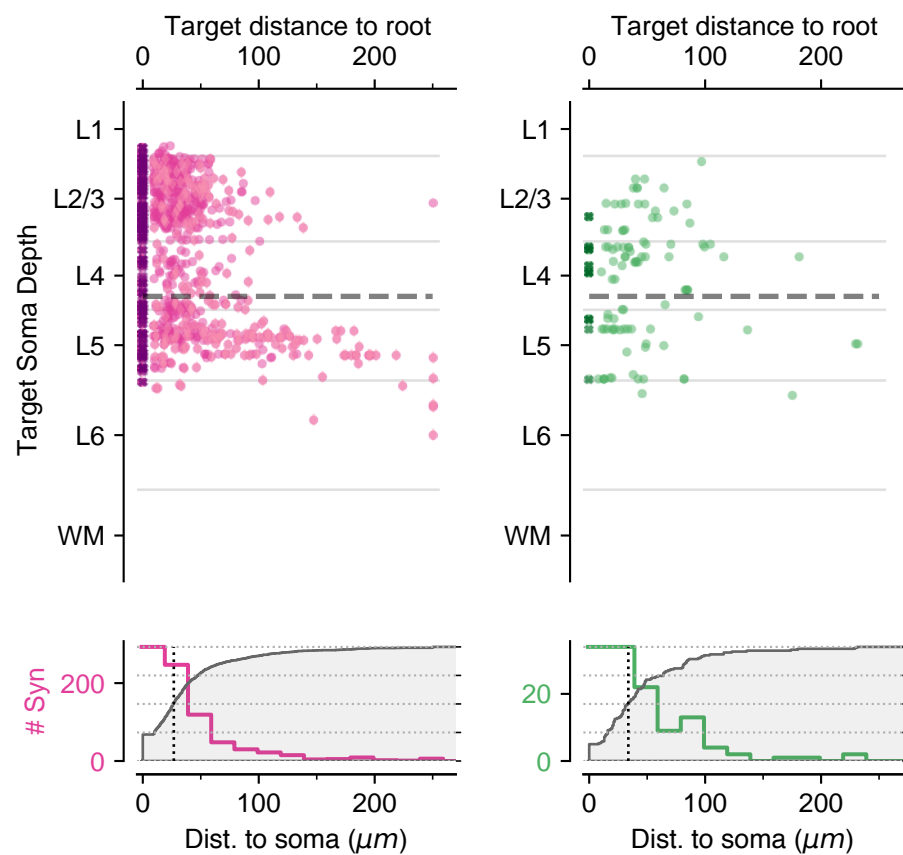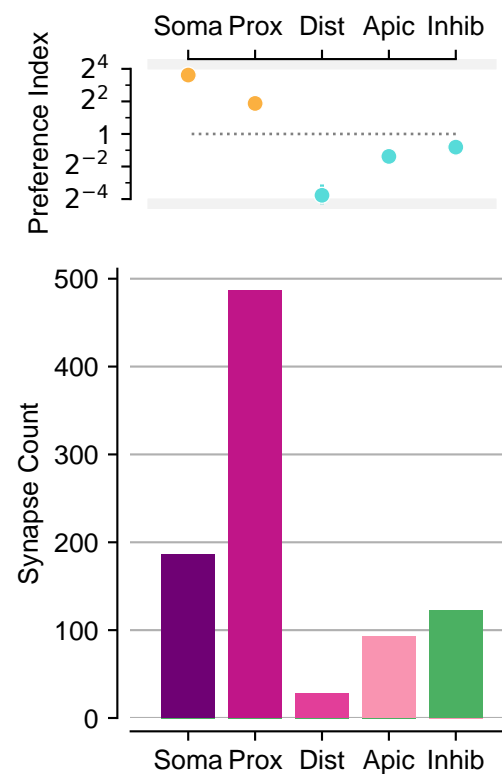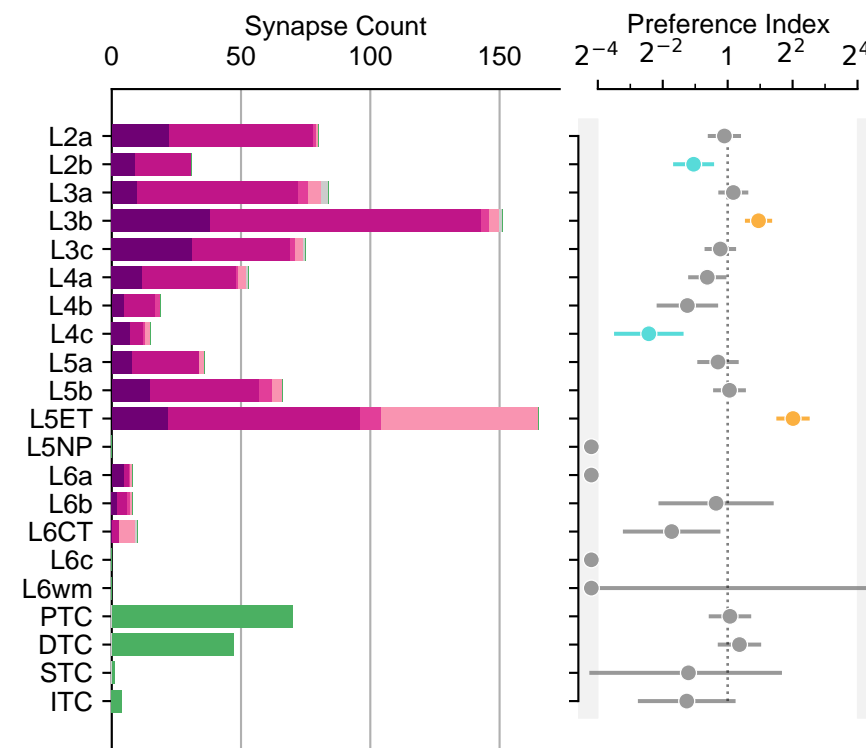

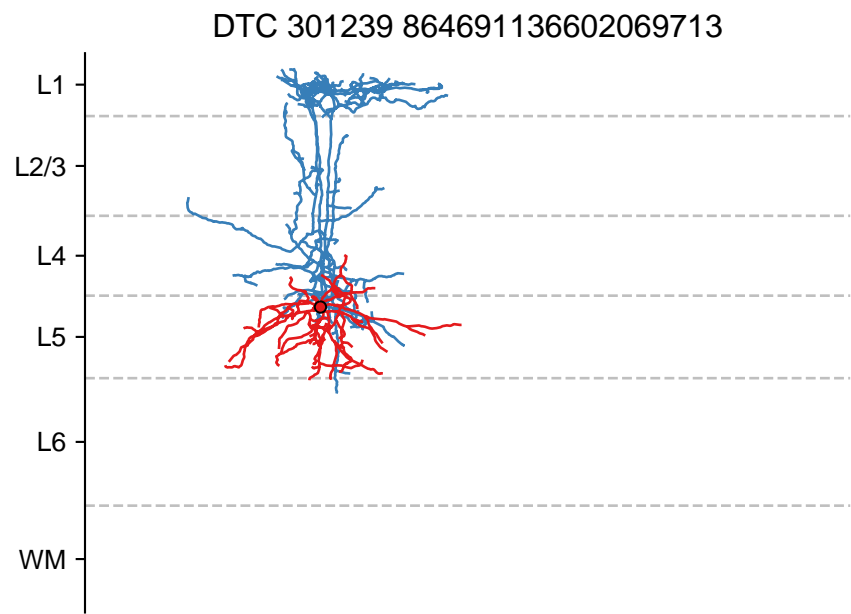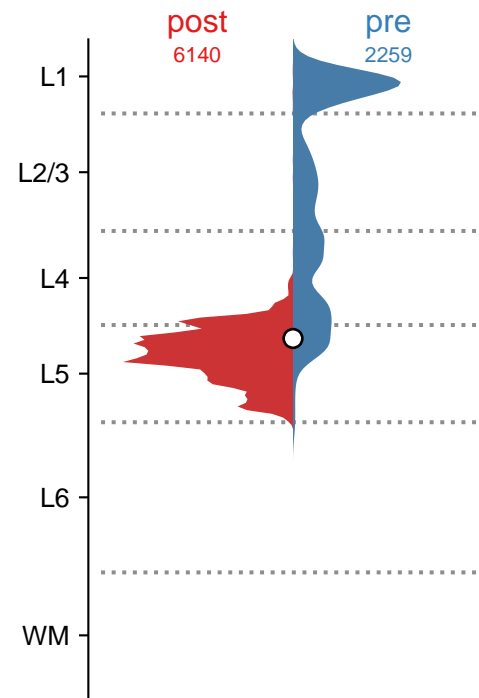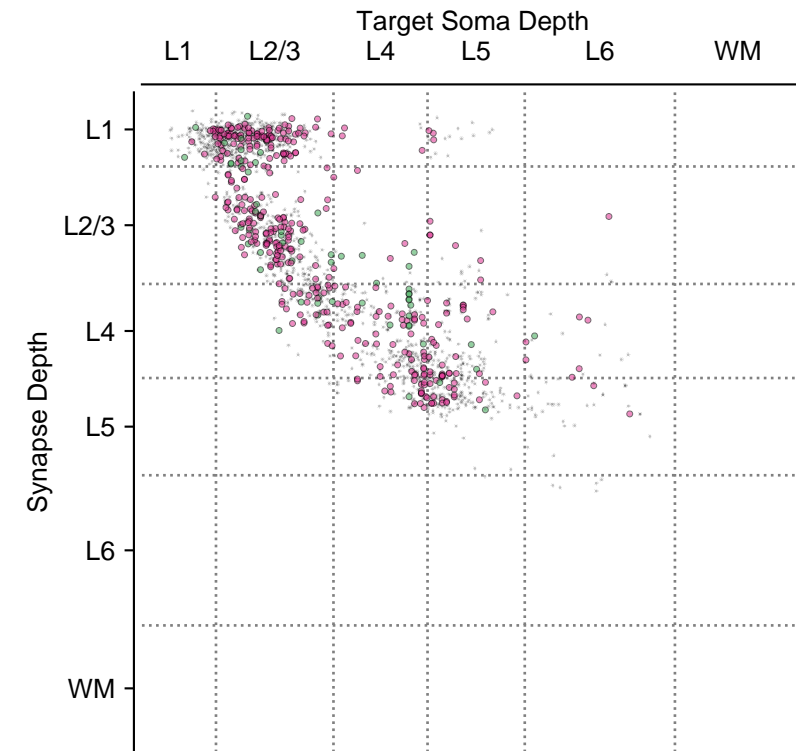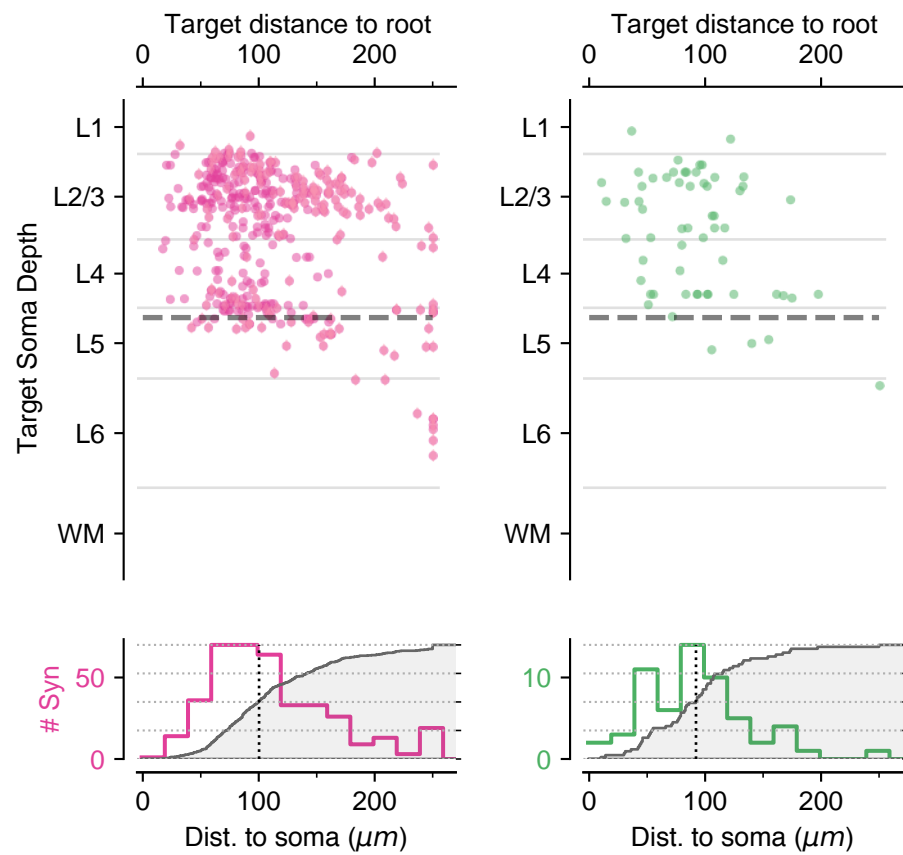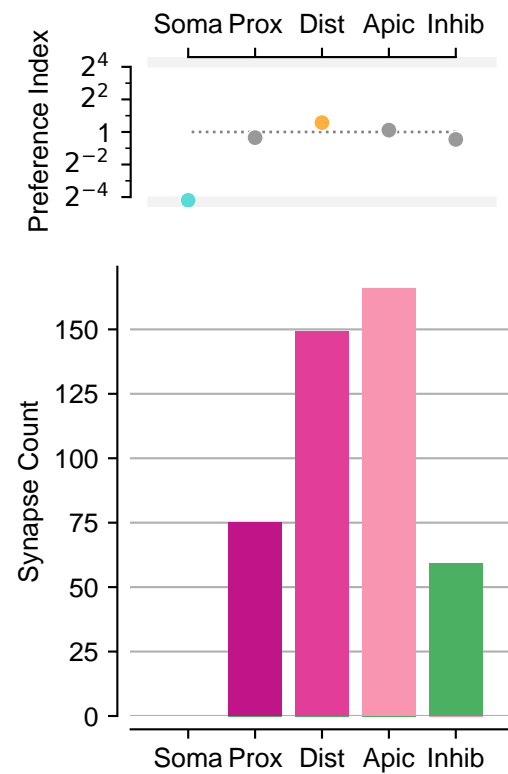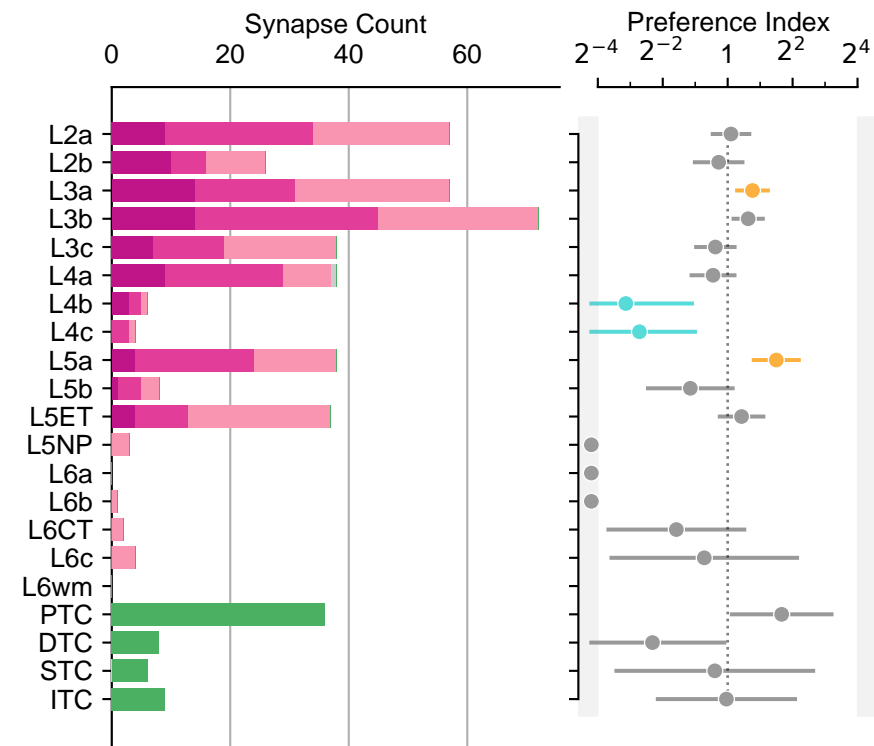



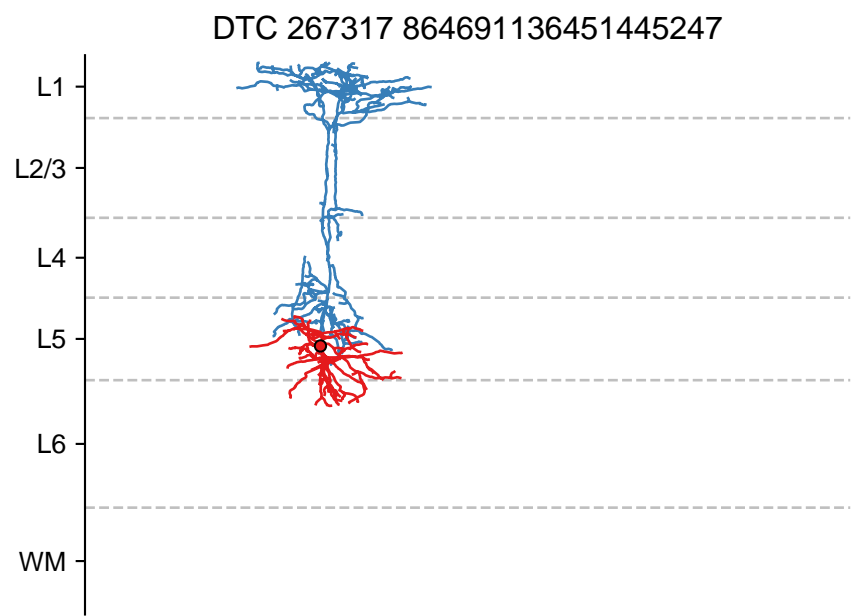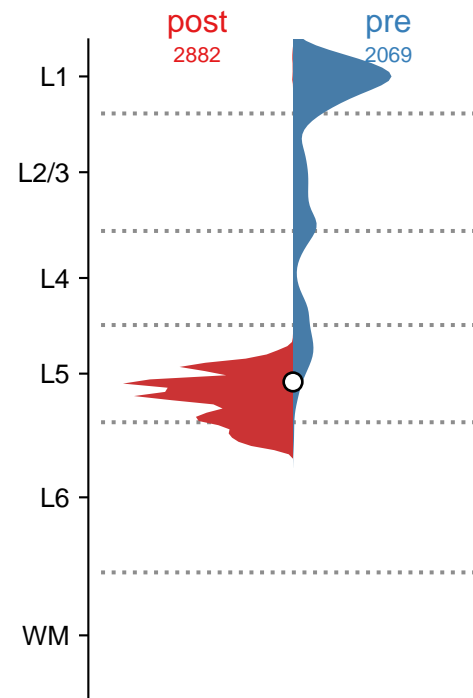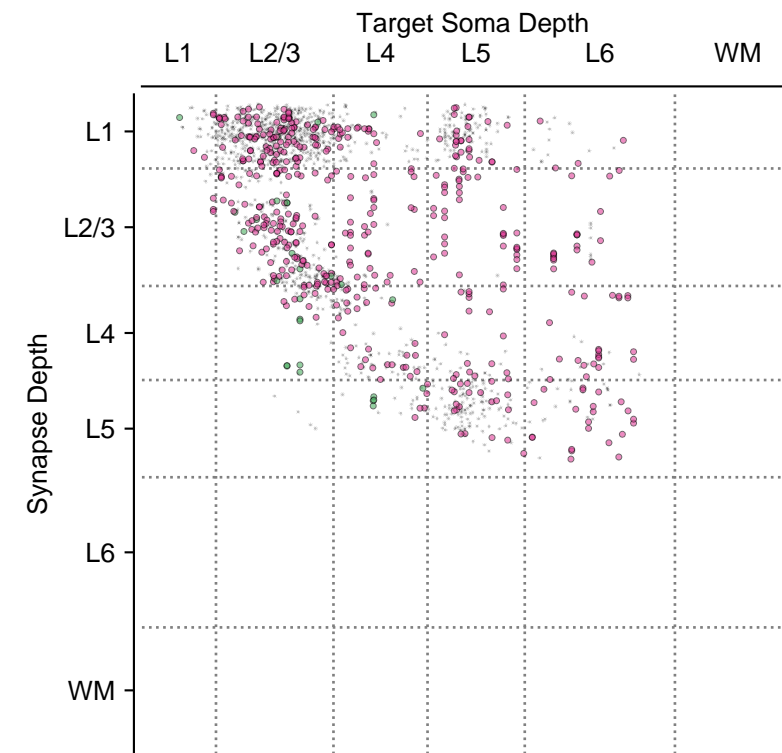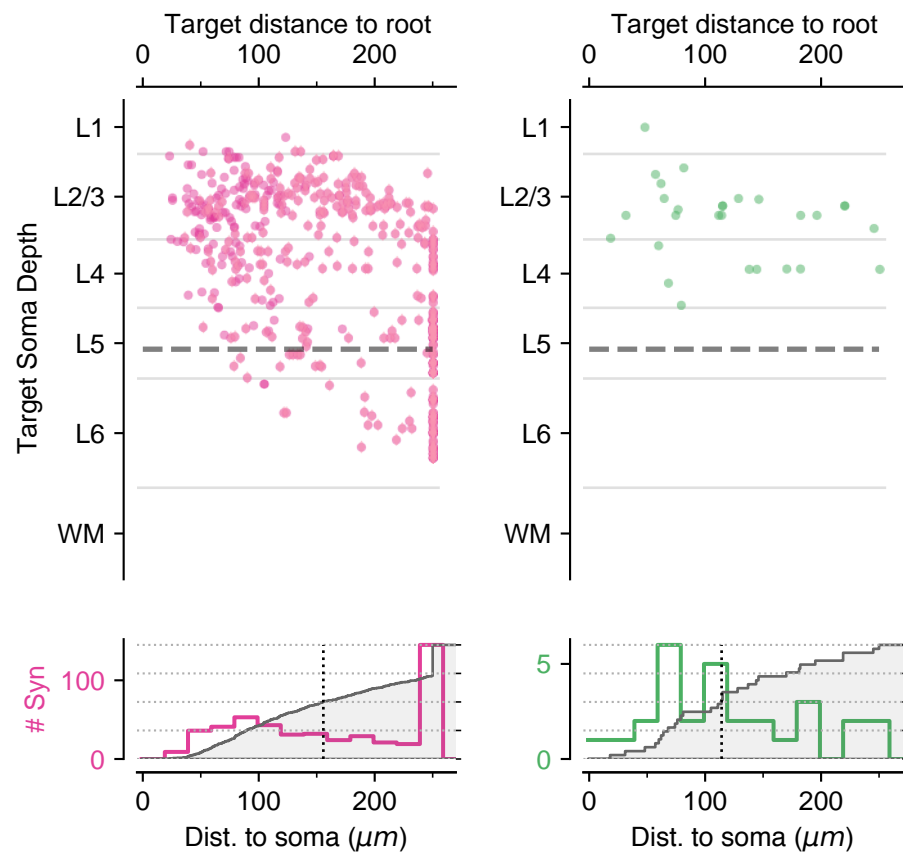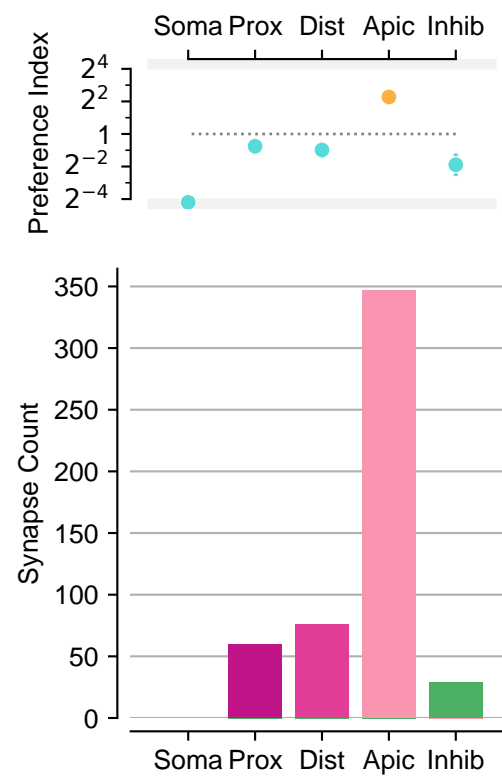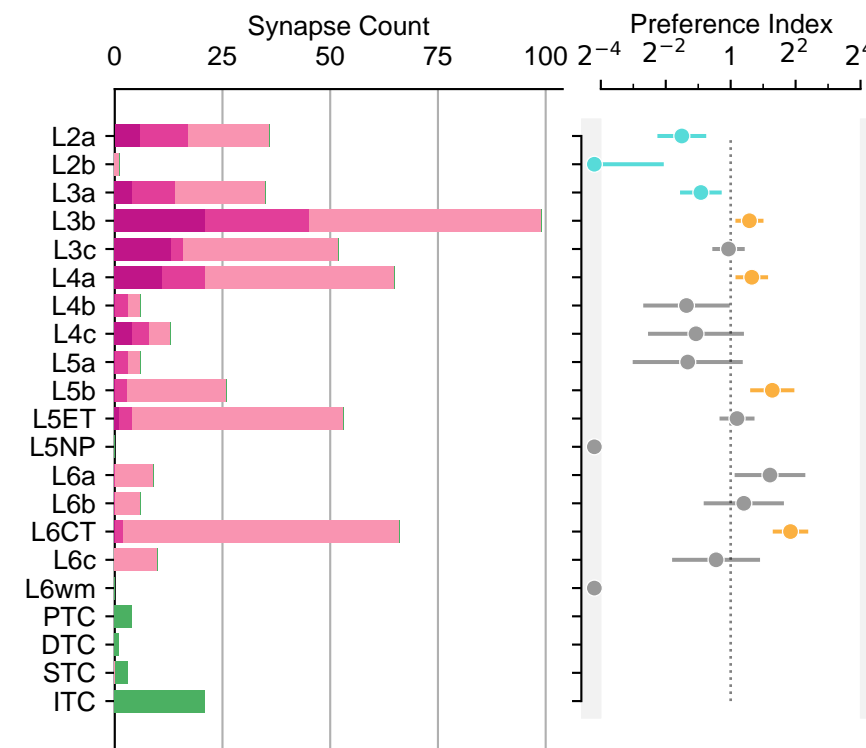

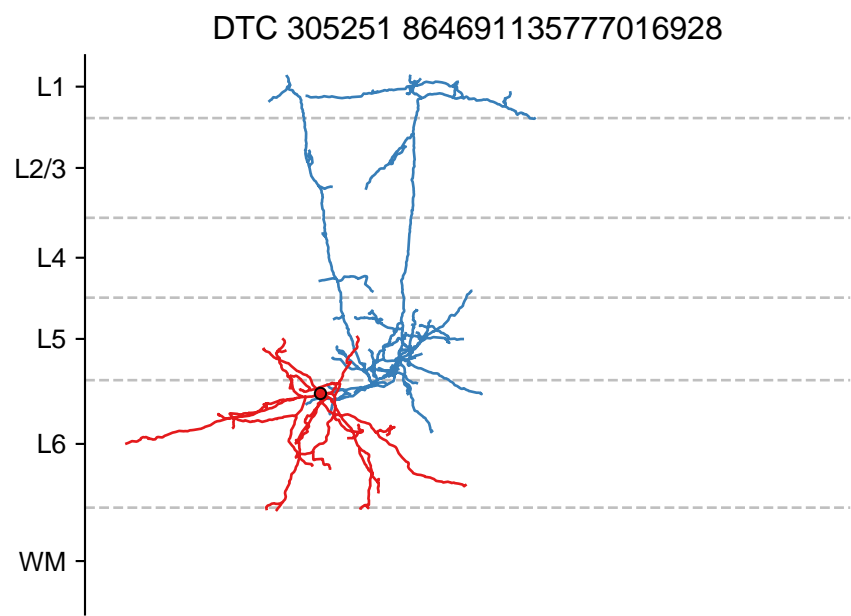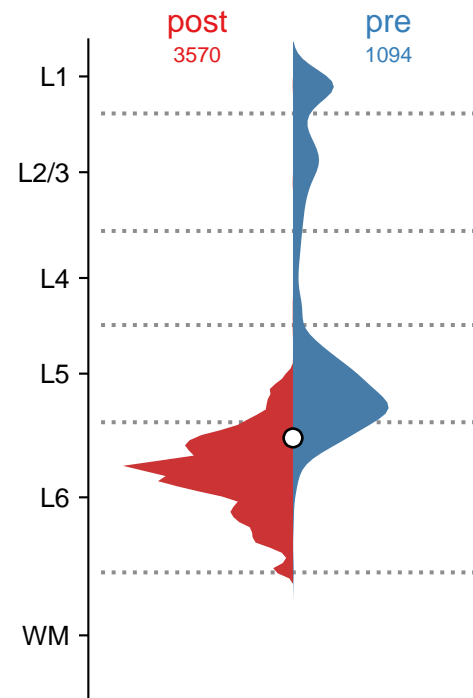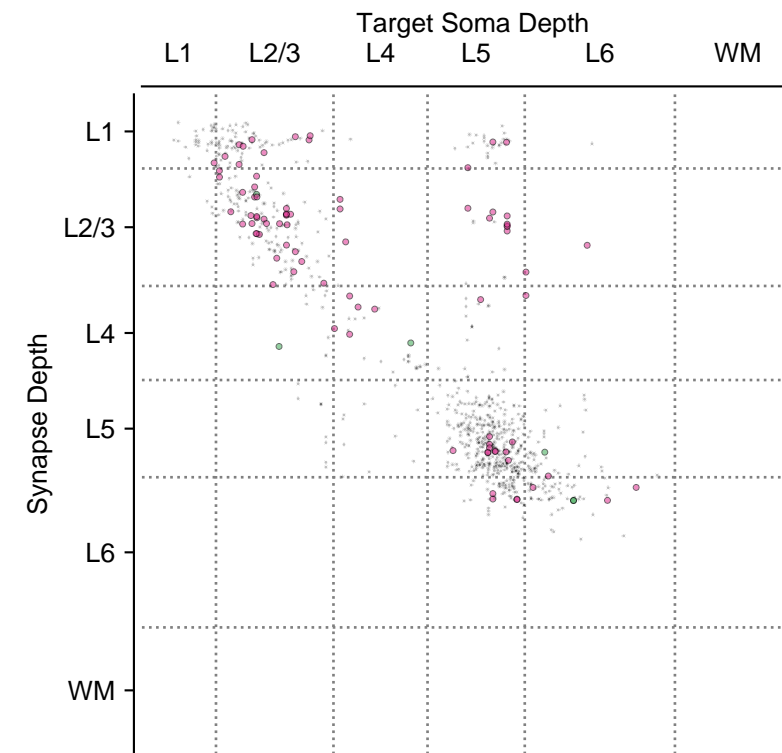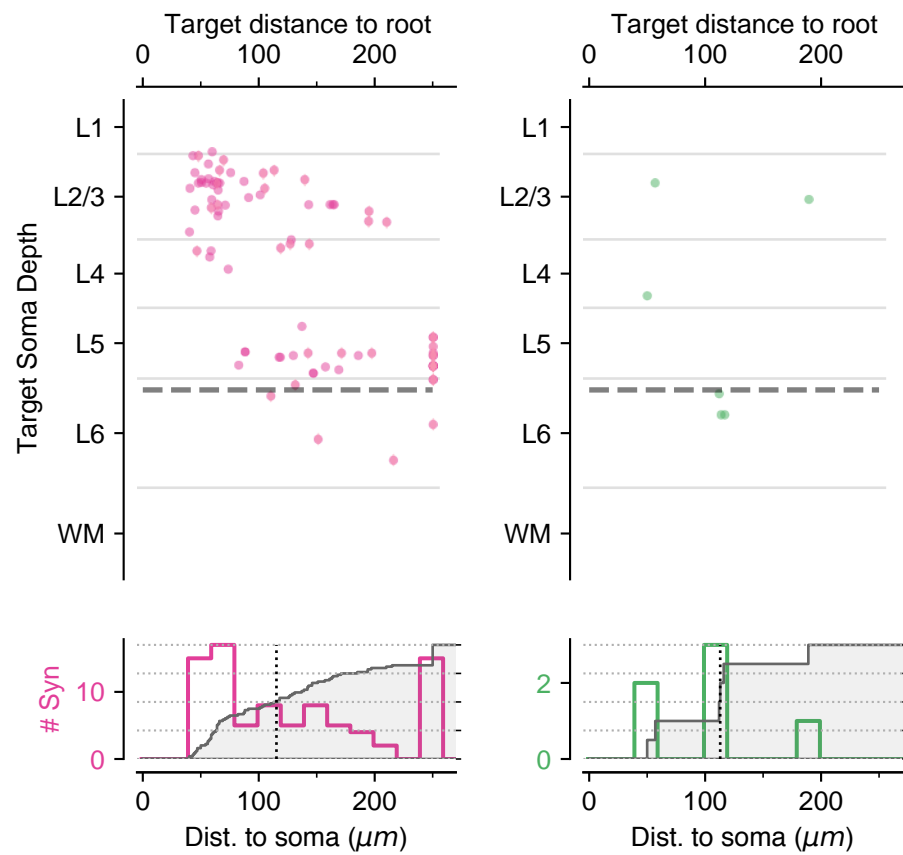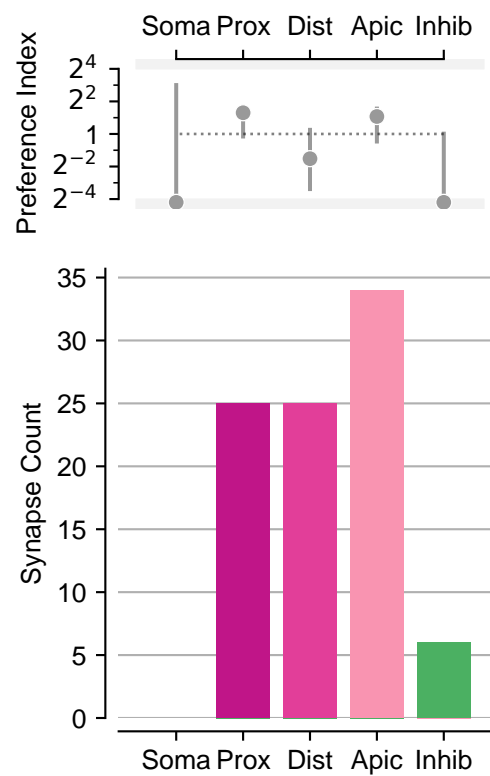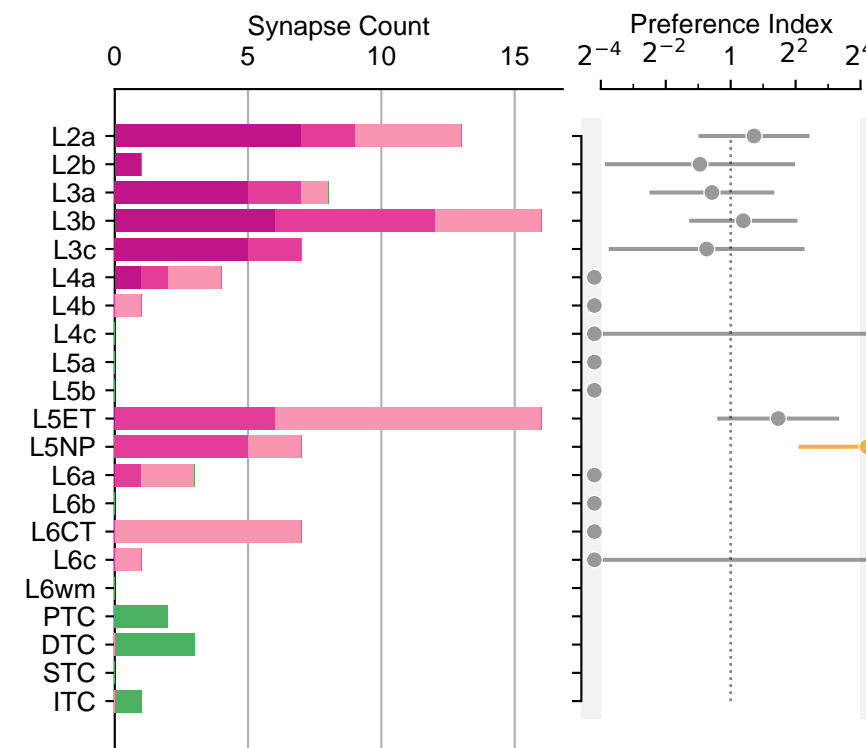

# Group 7

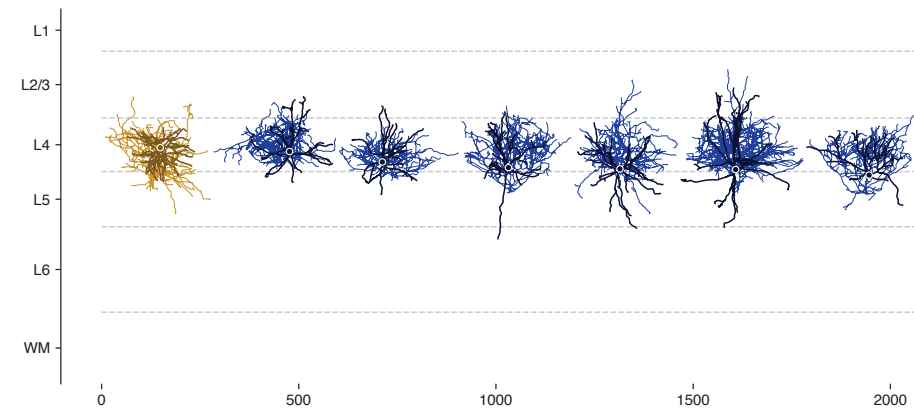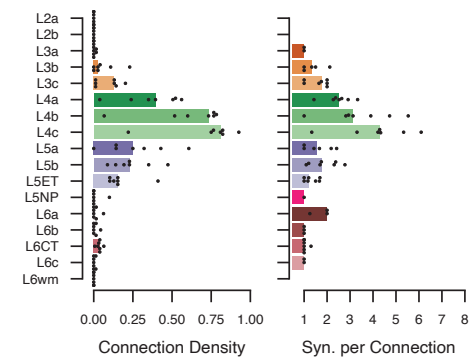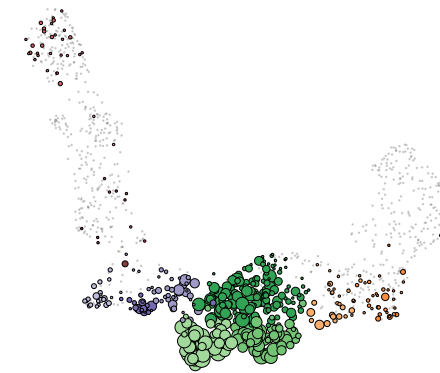

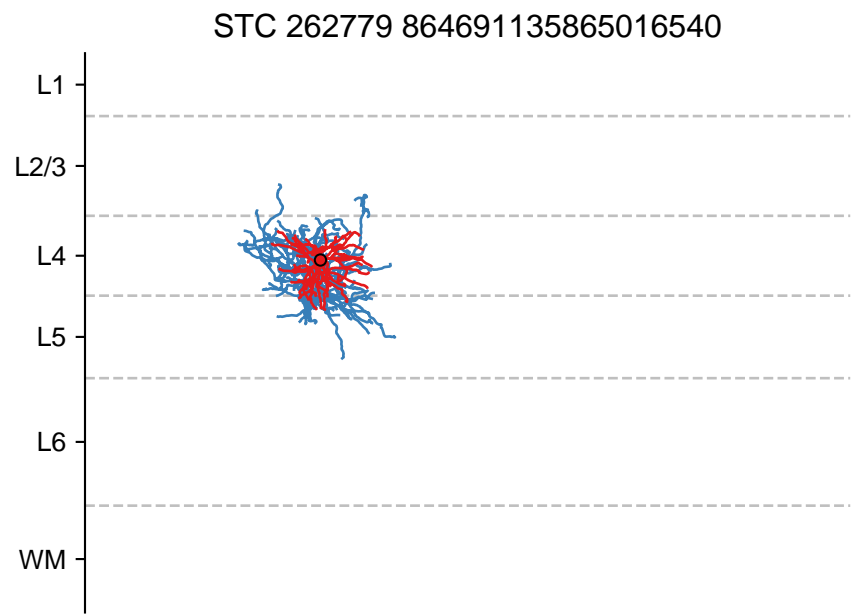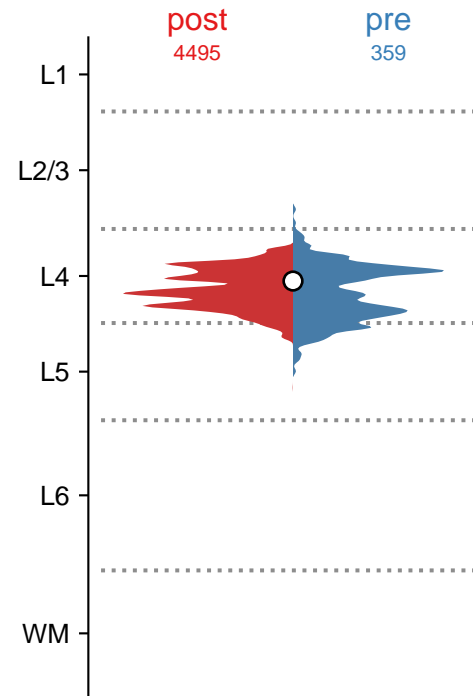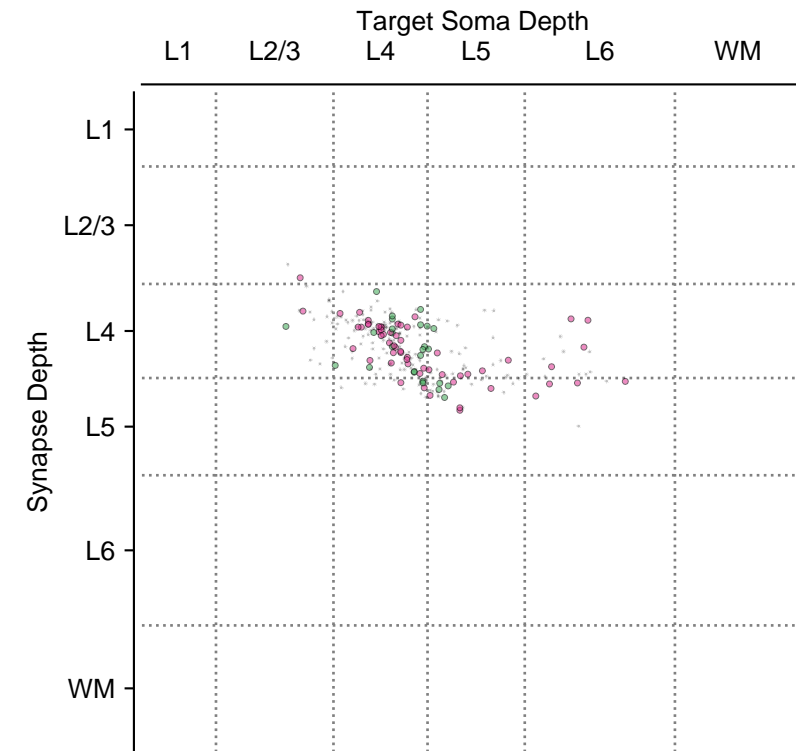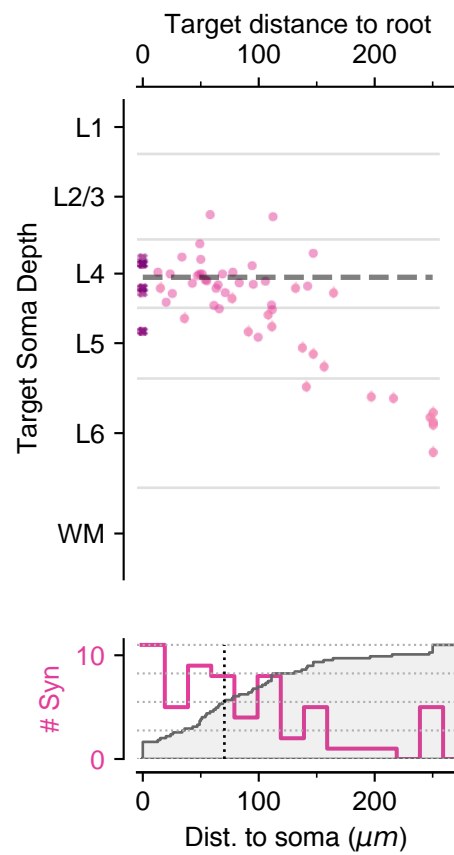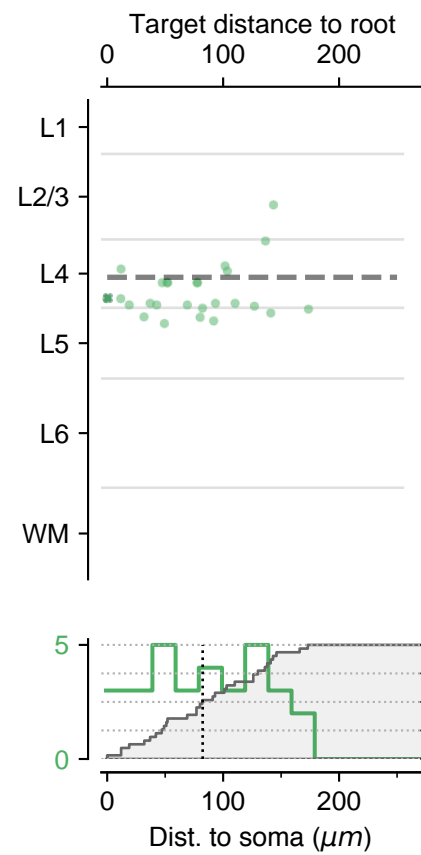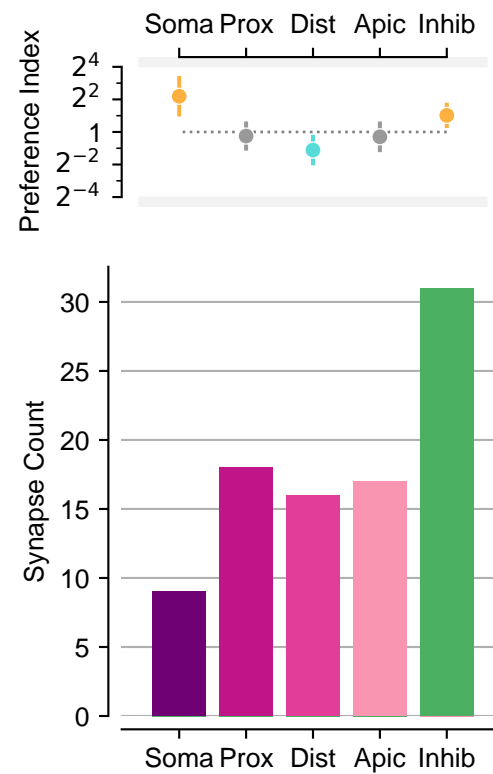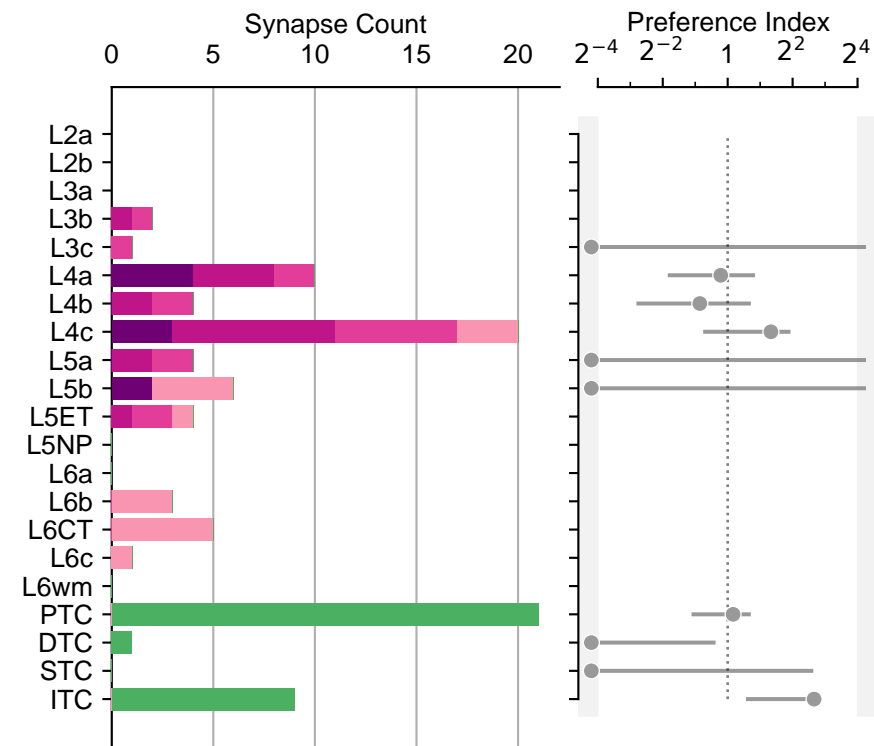

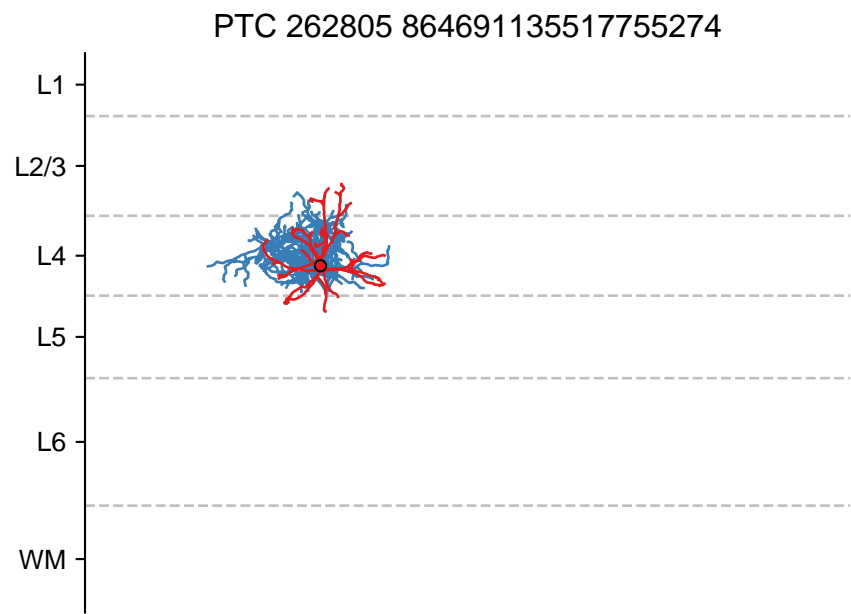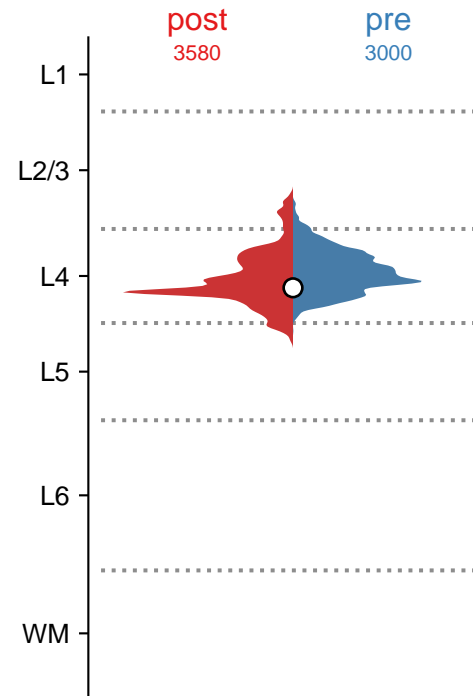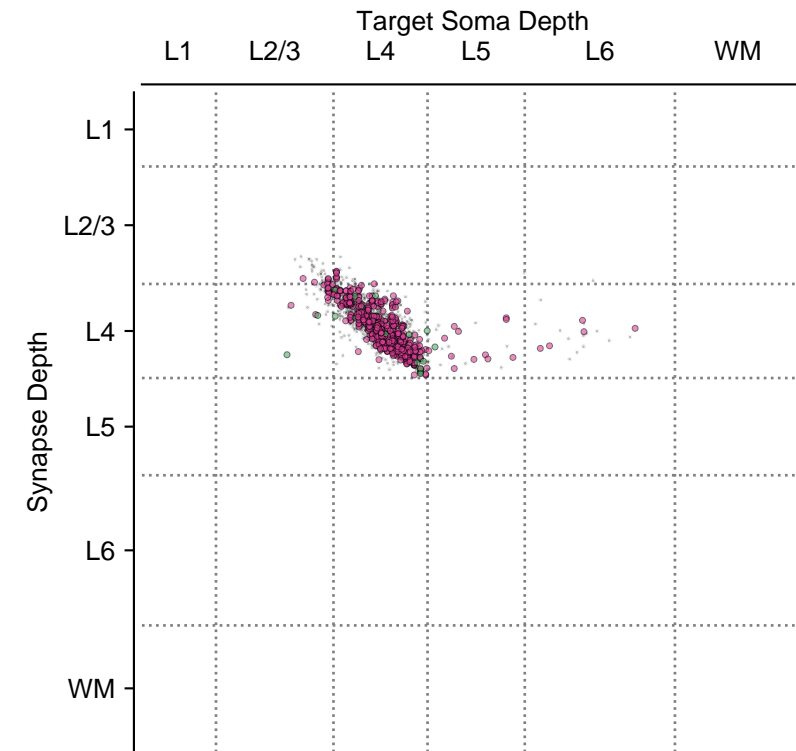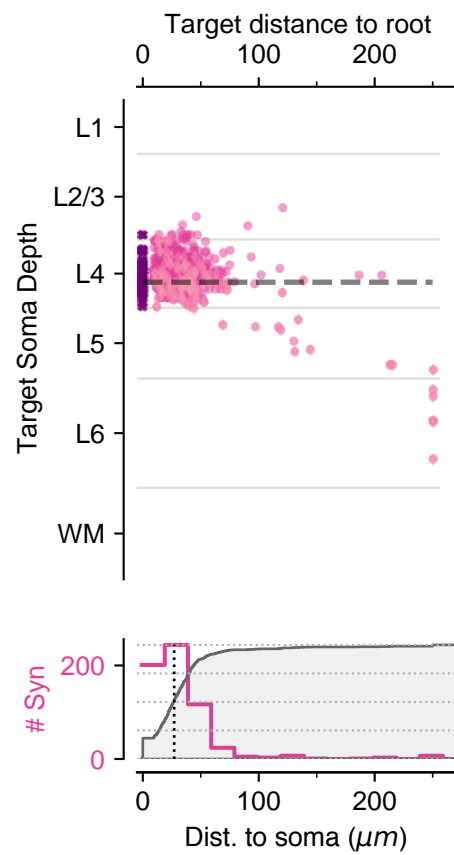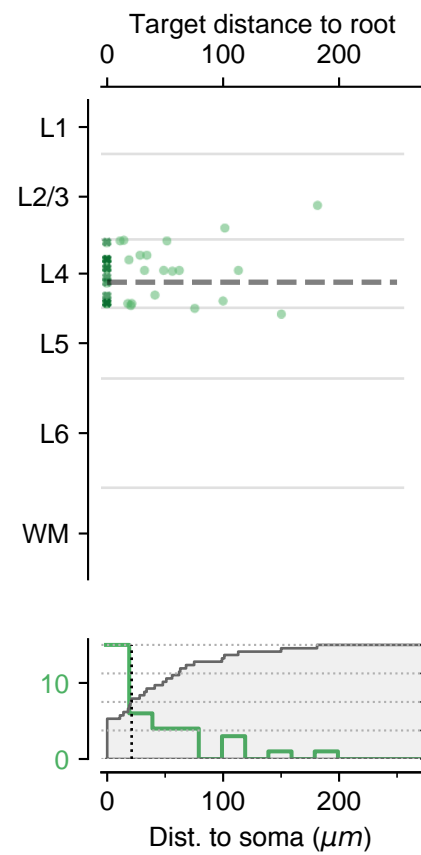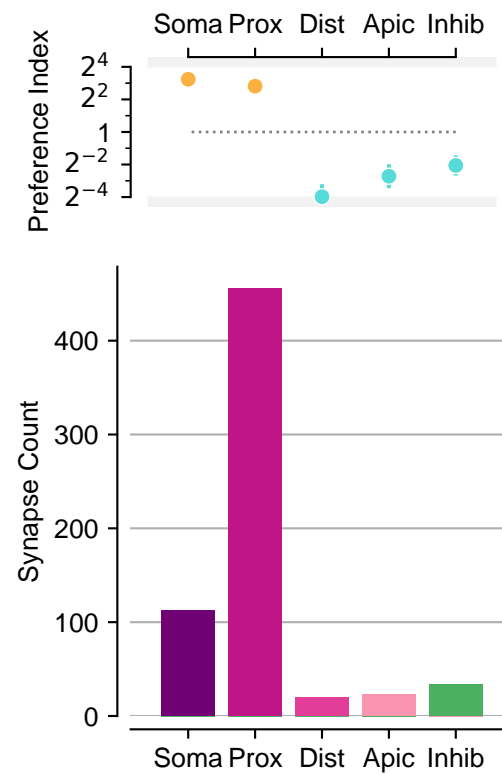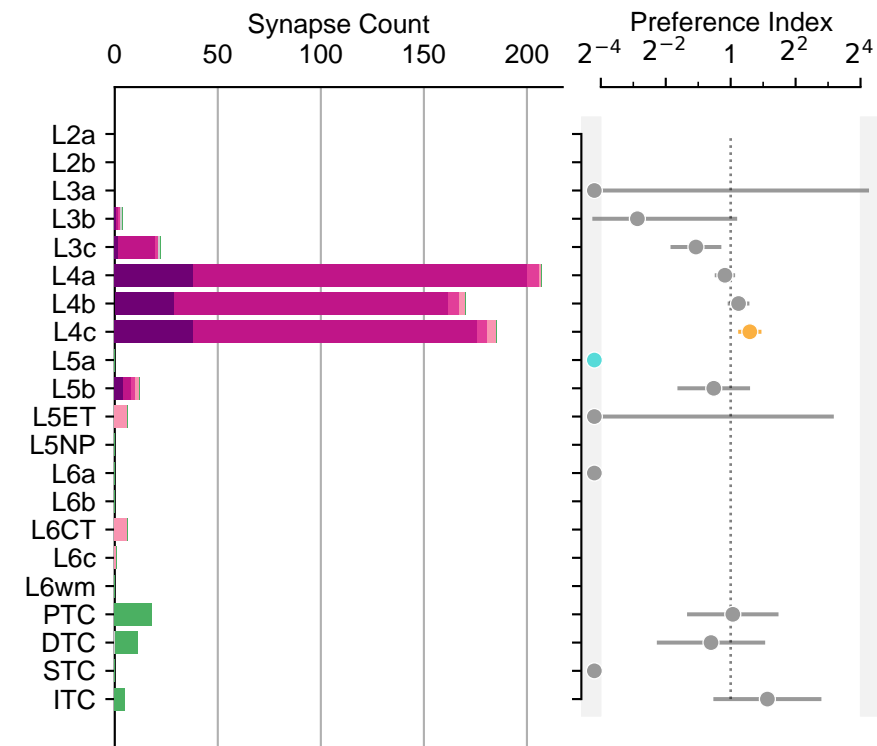

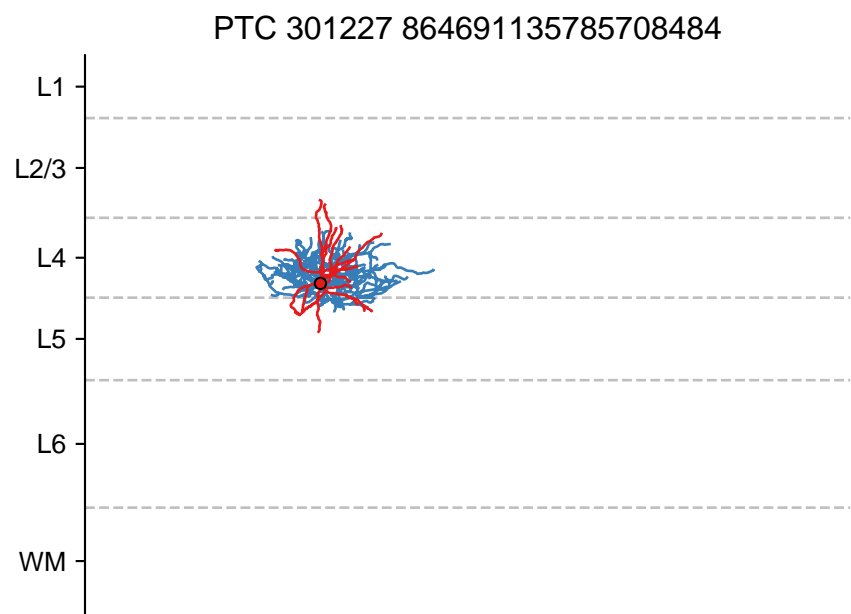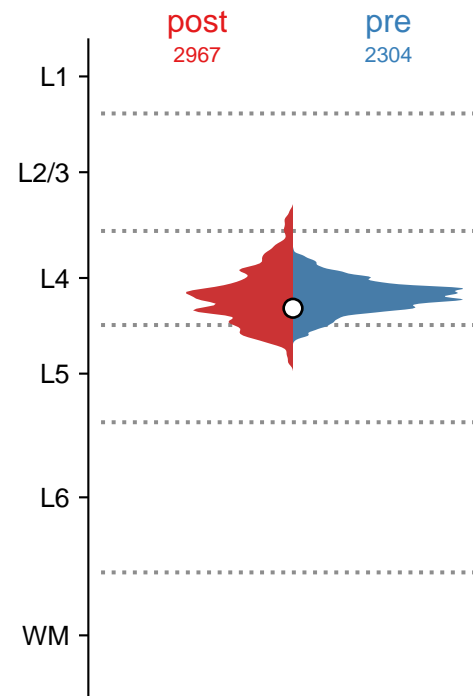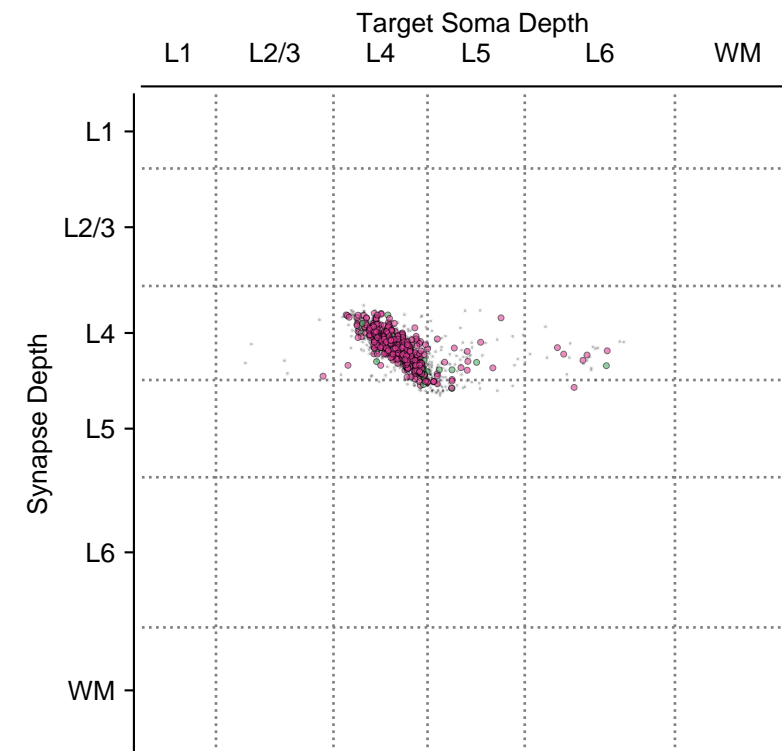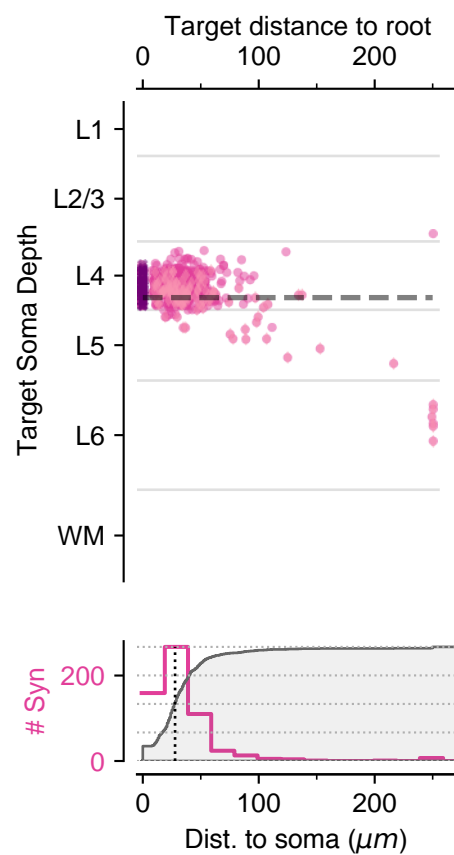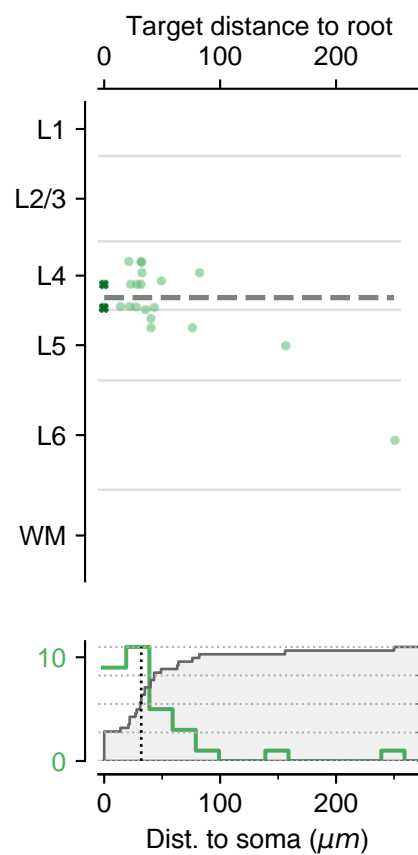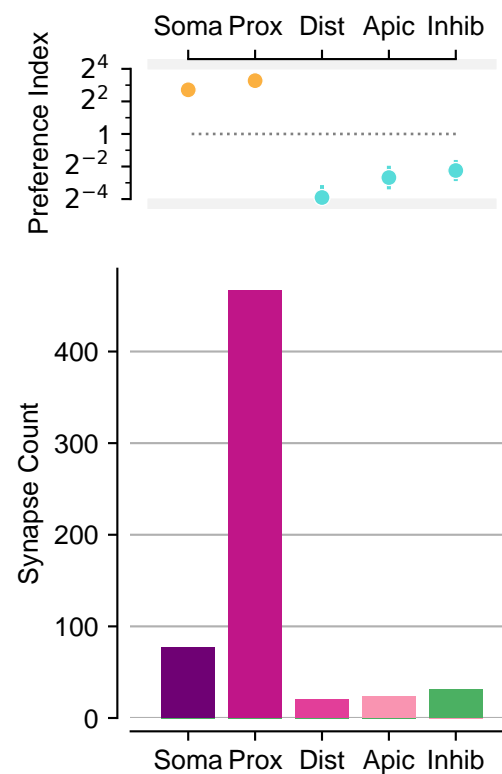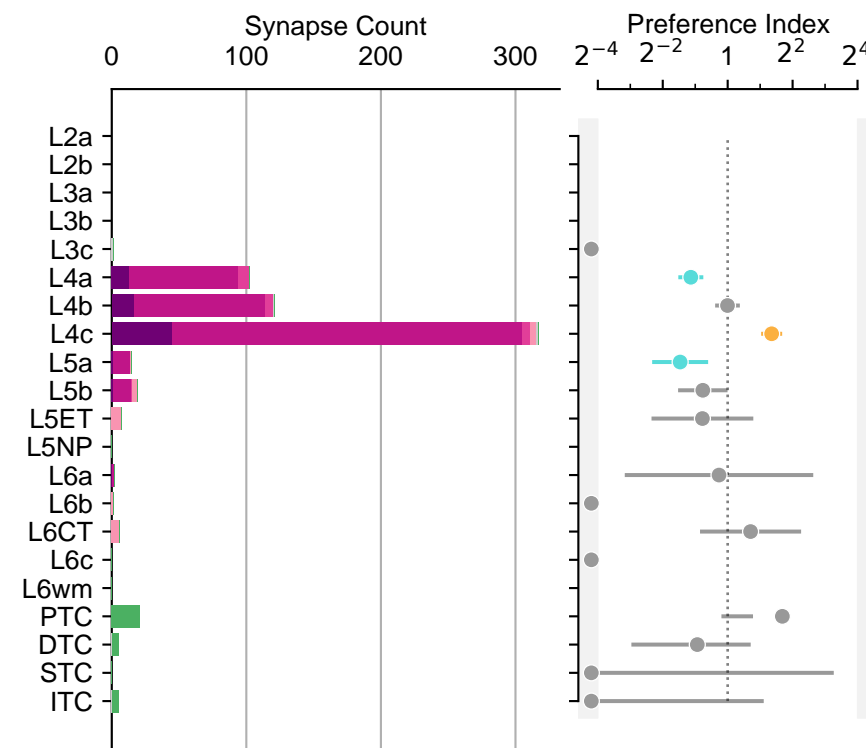

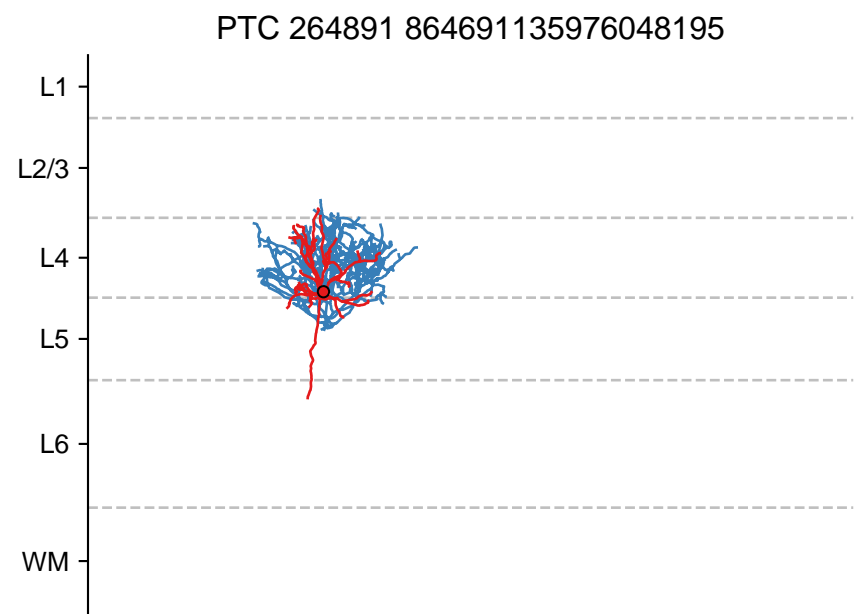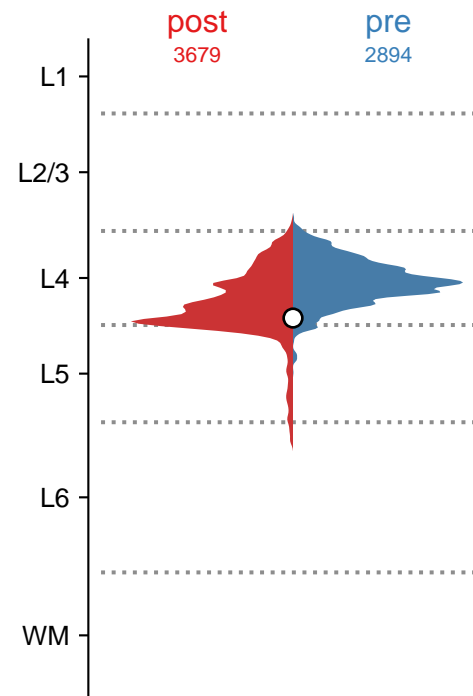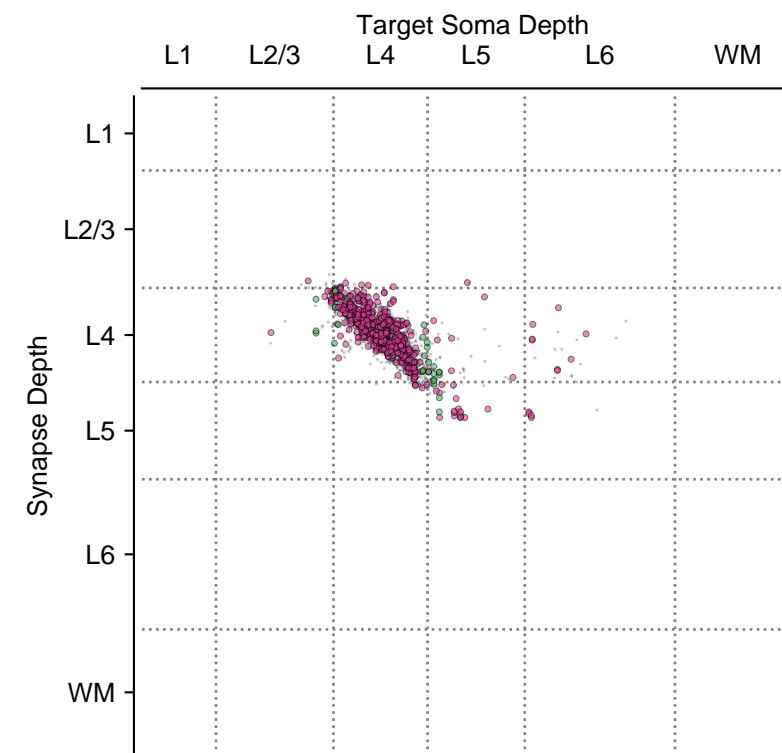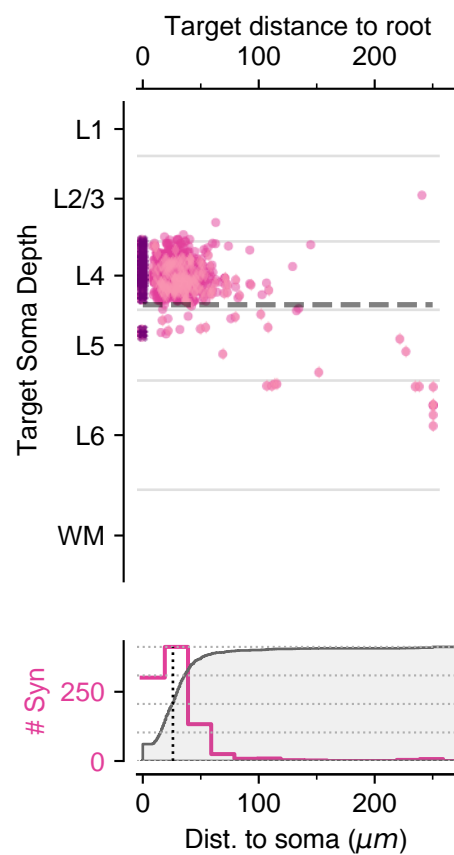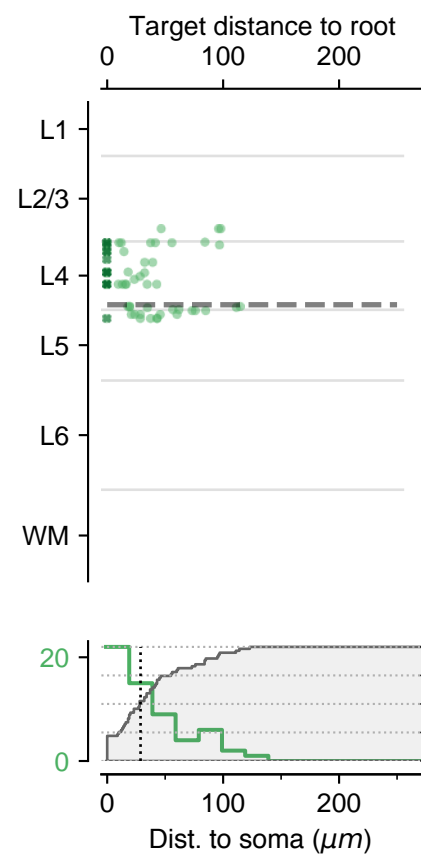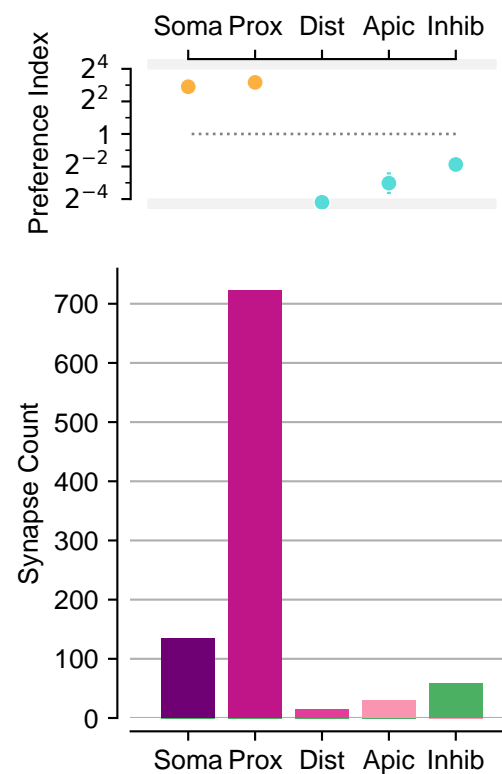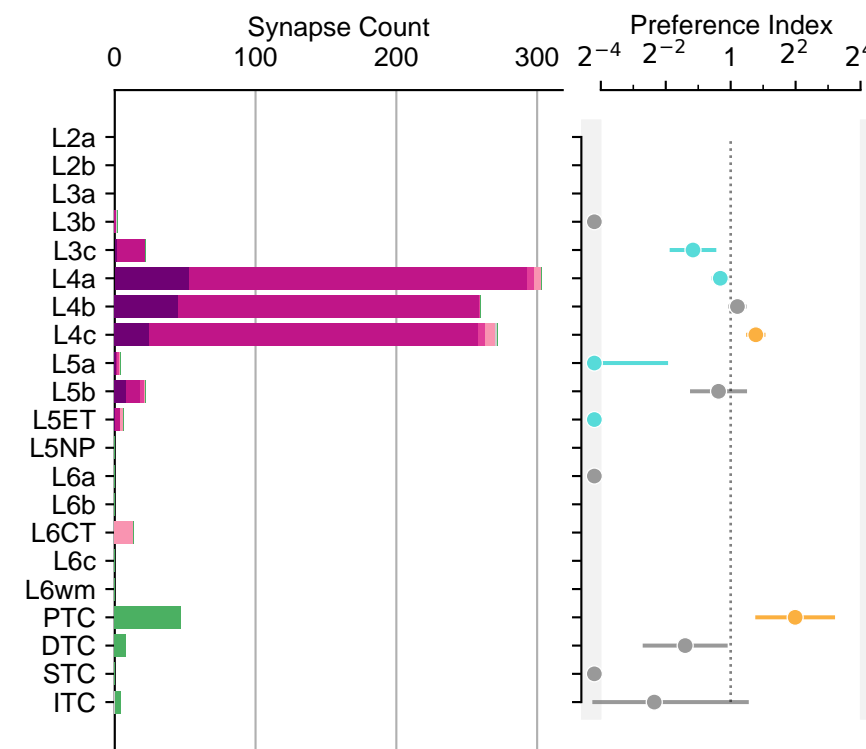

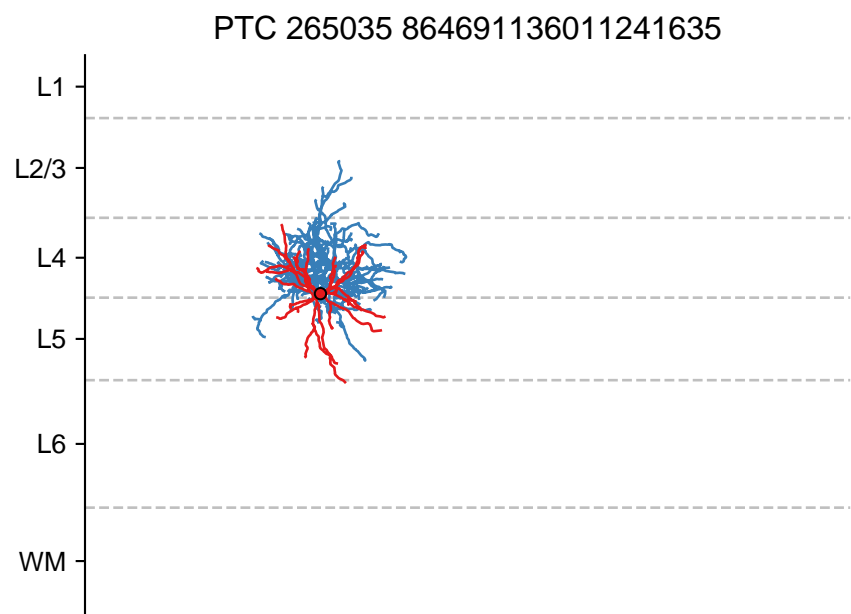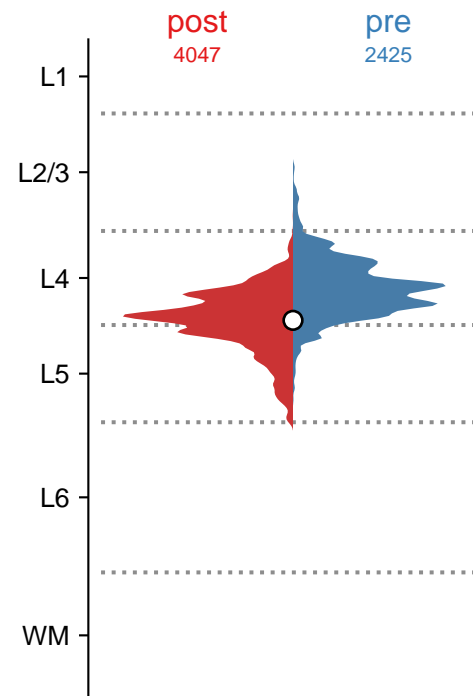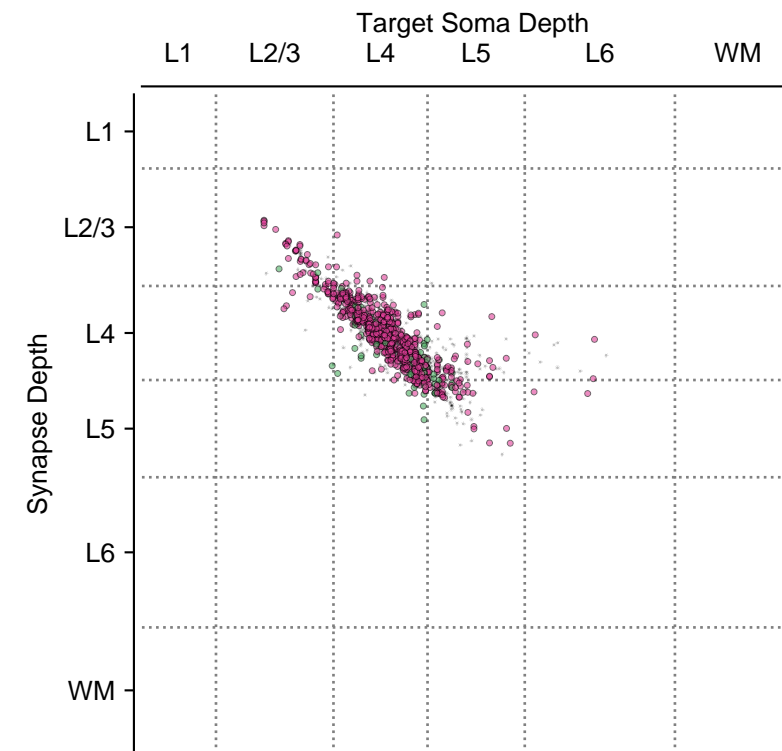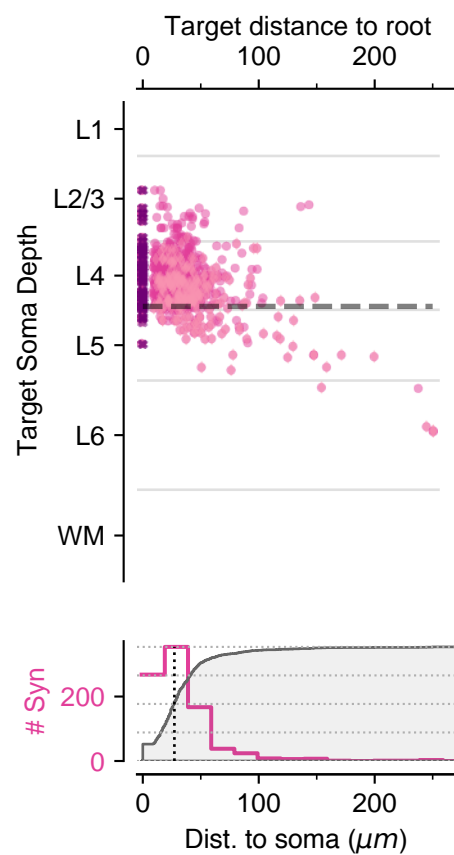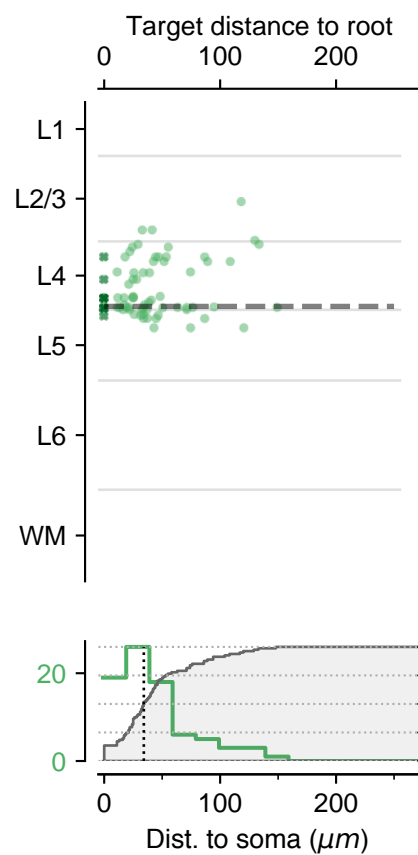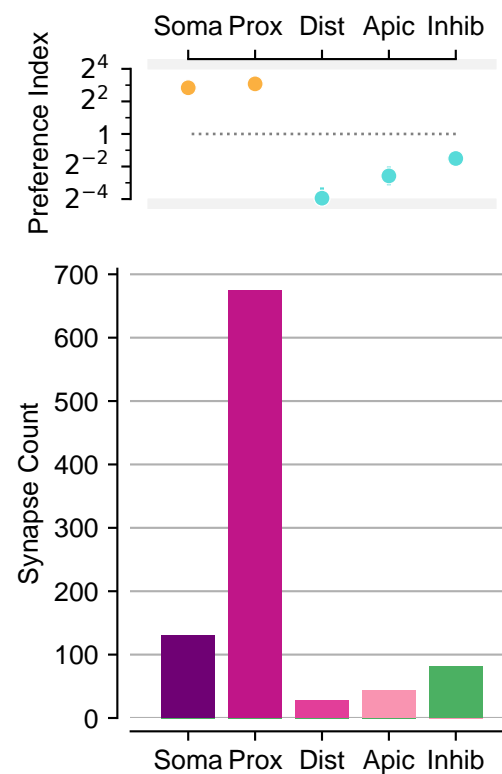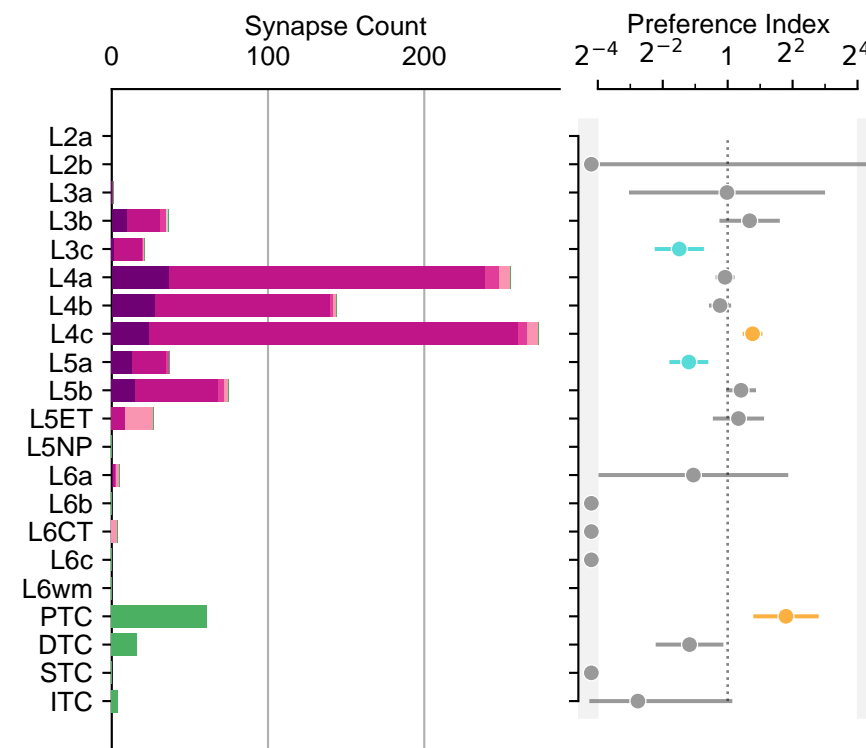



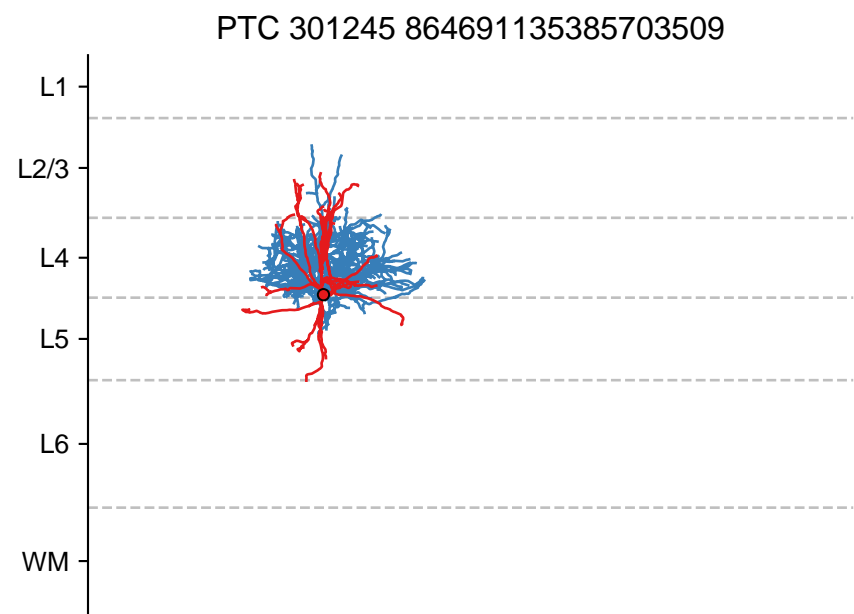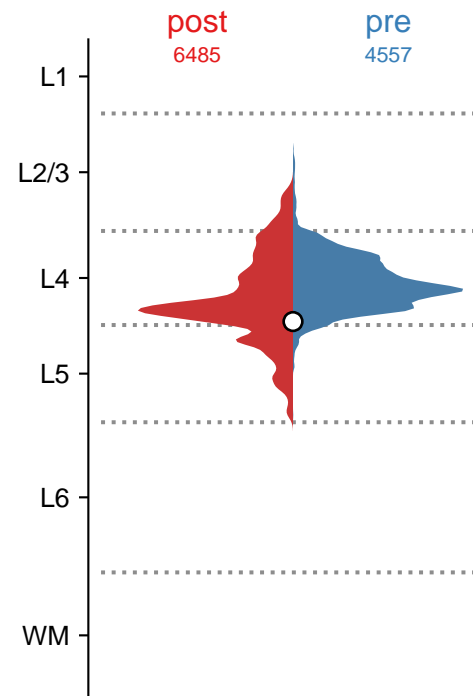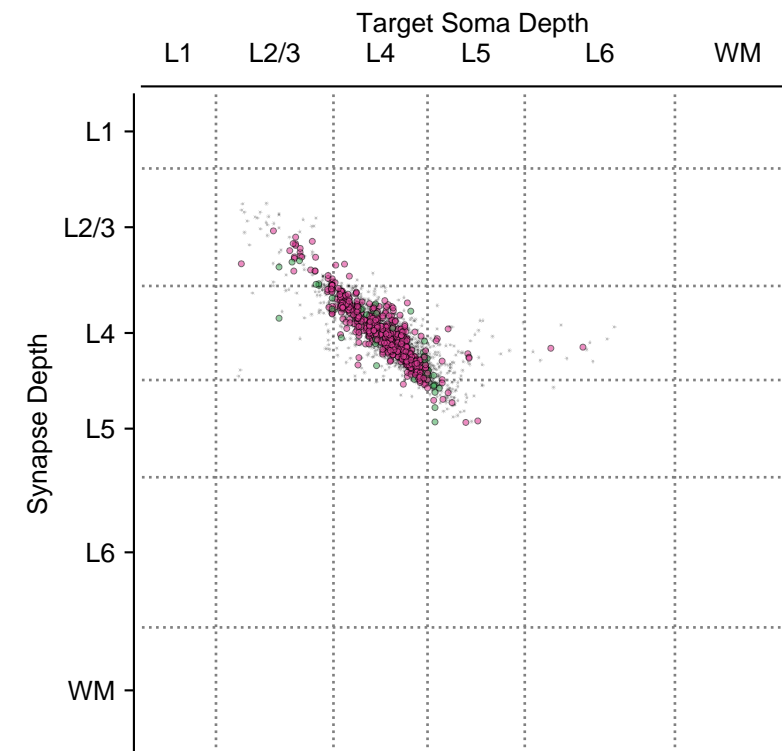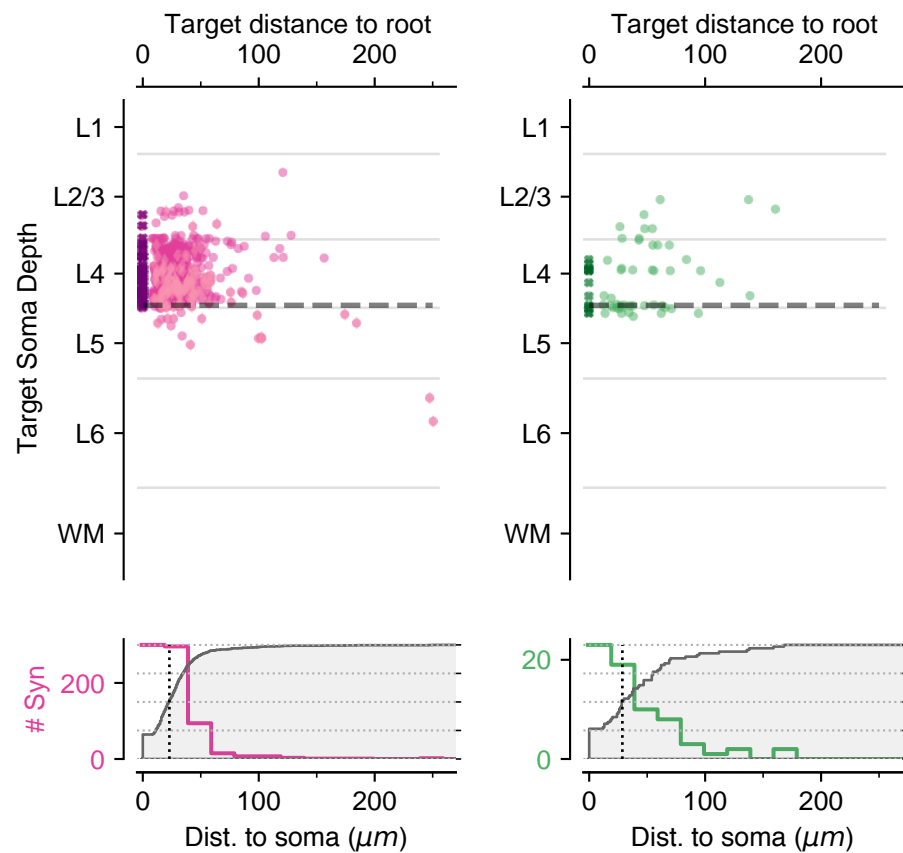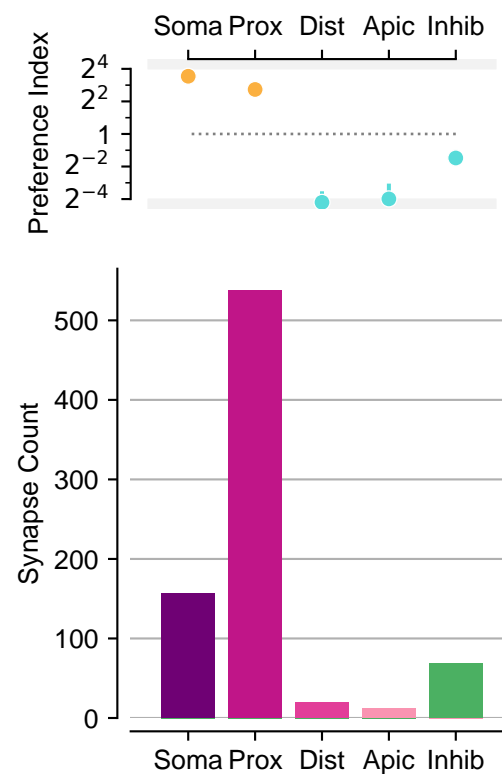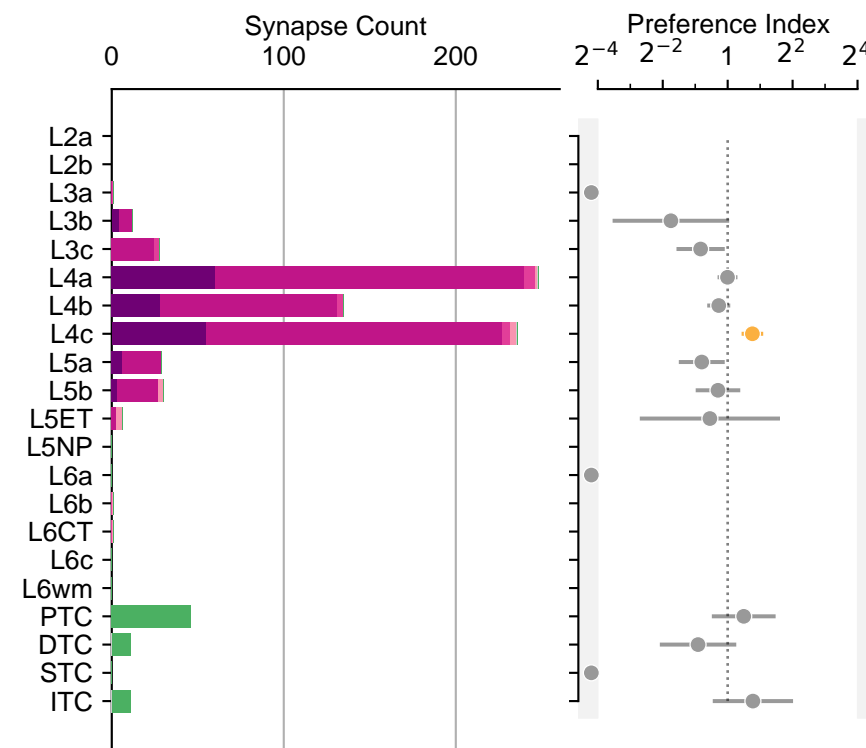

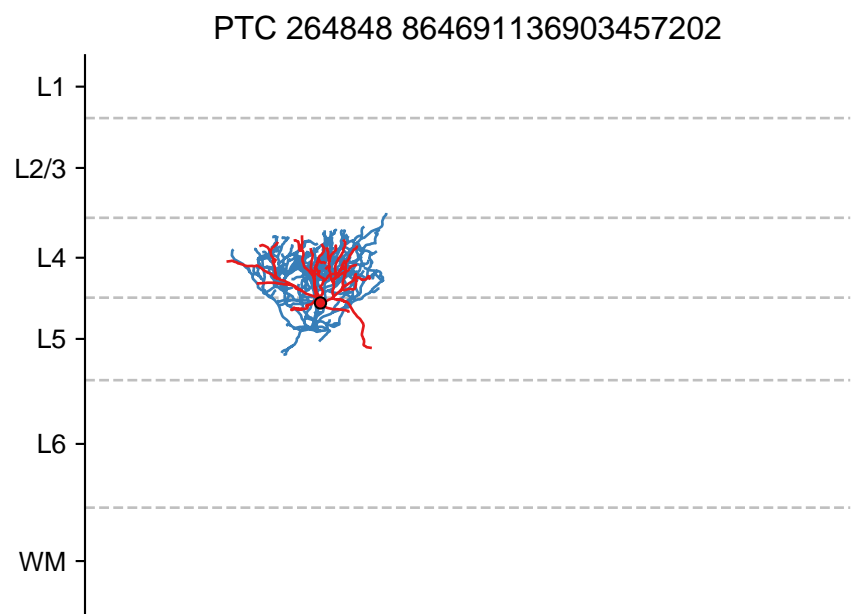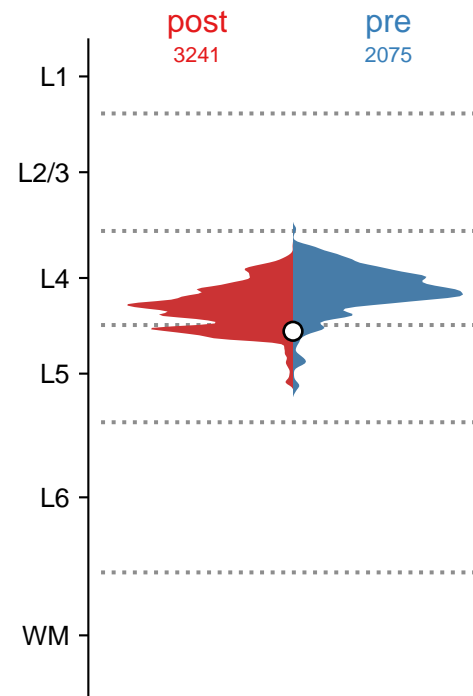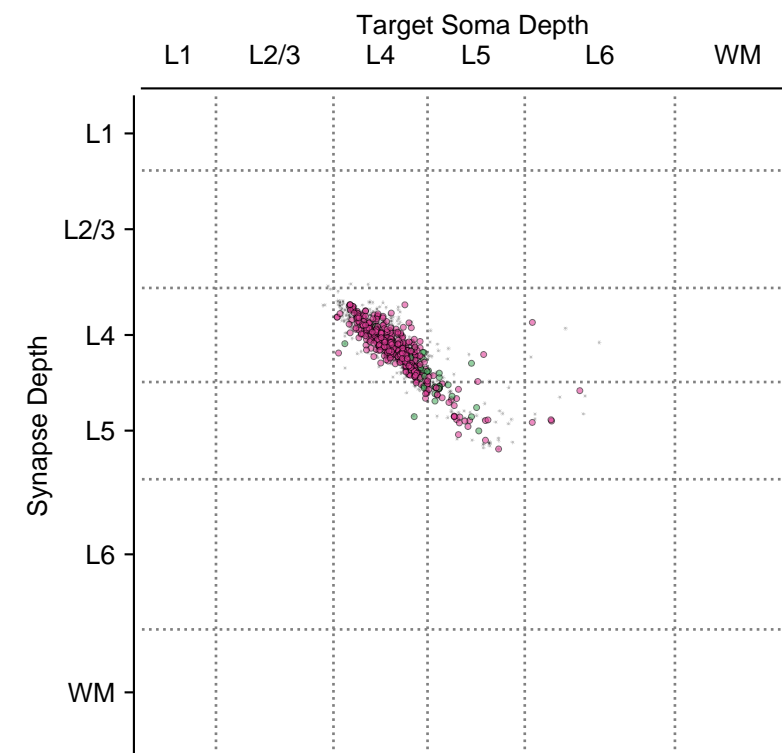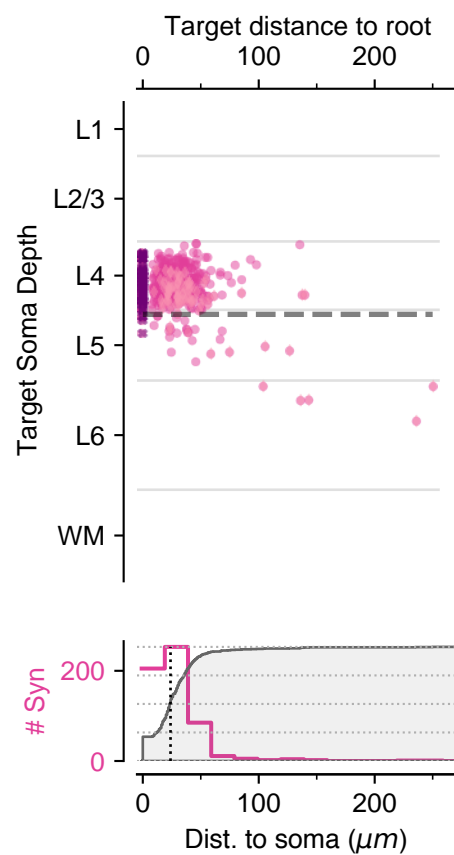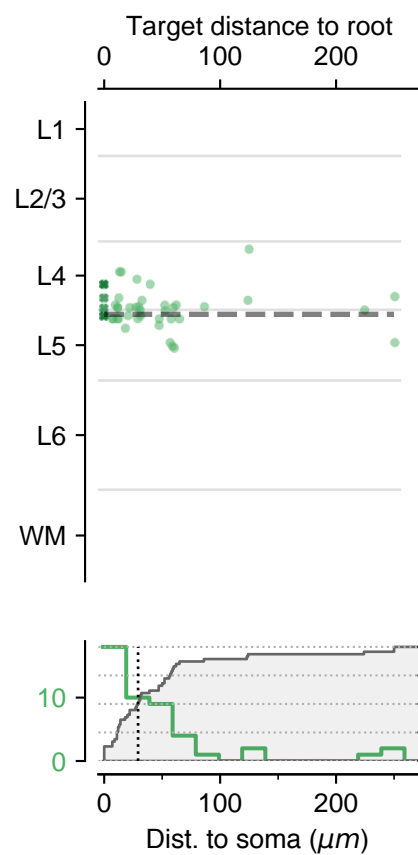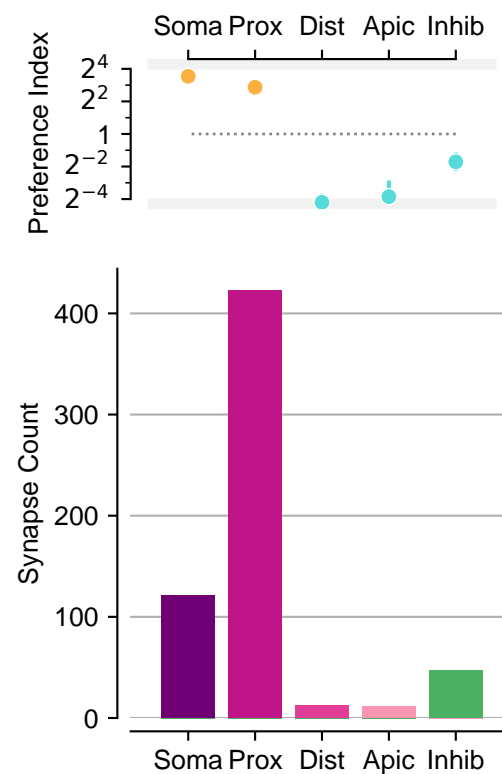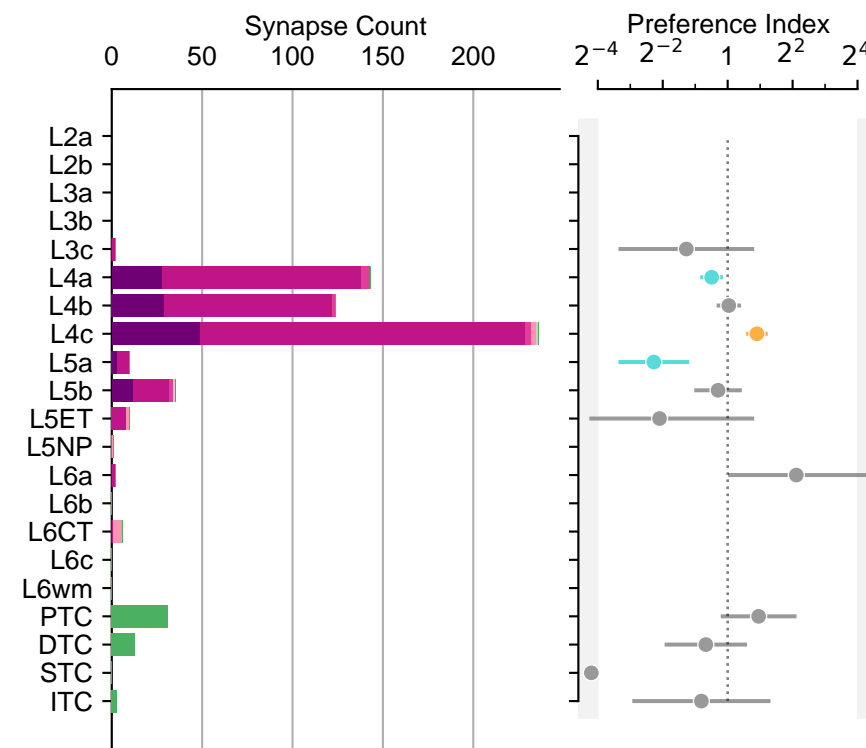

# Group 8

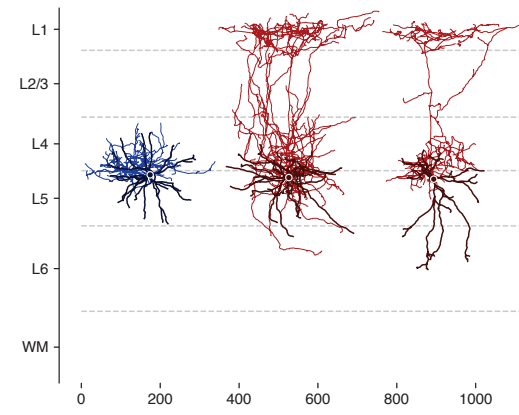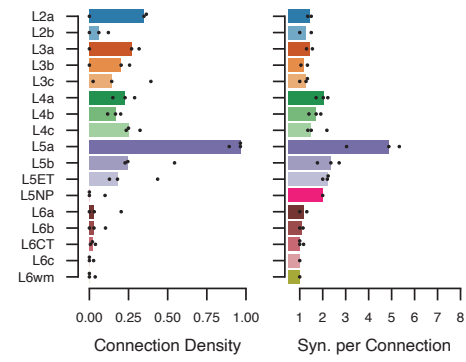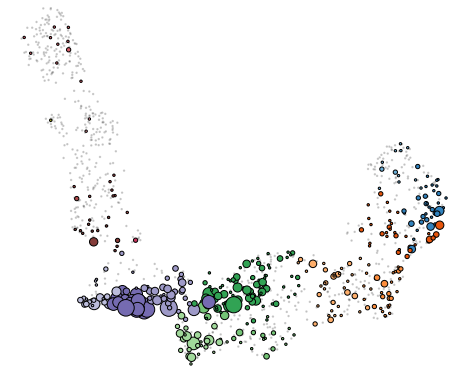

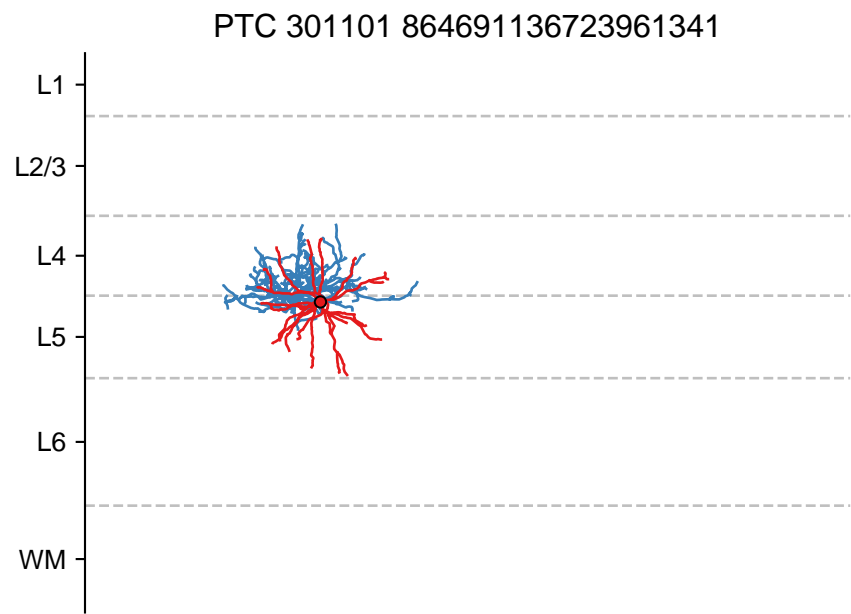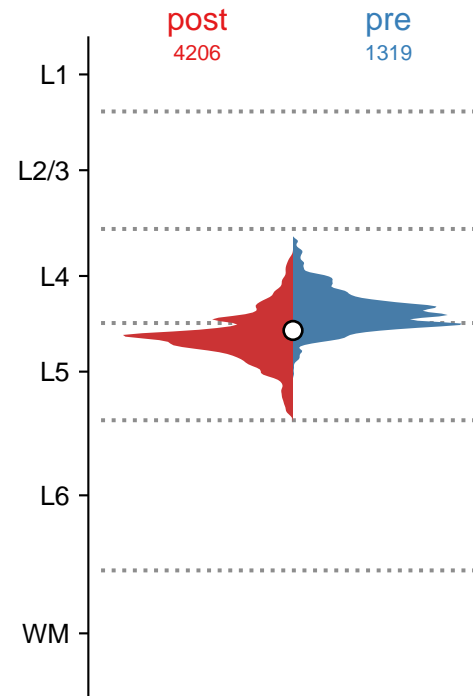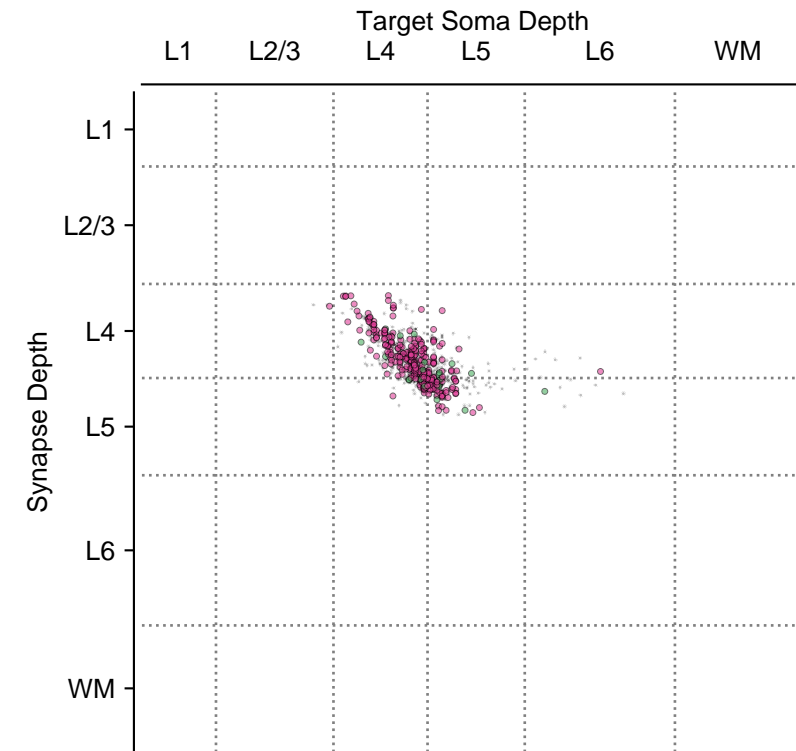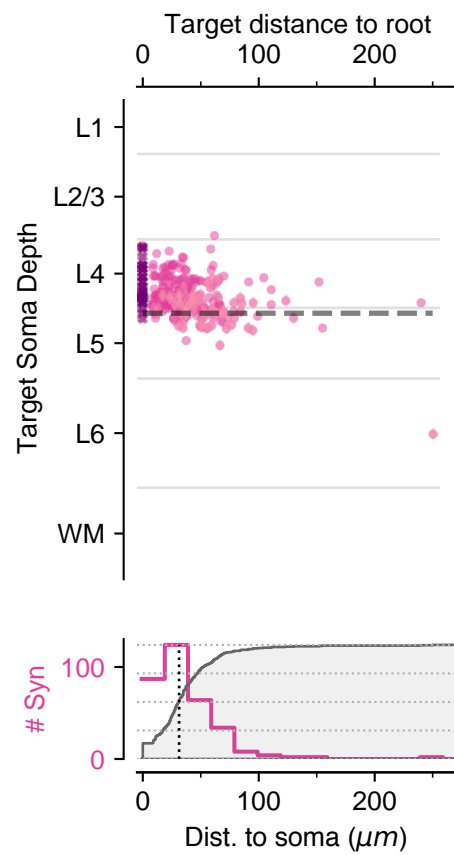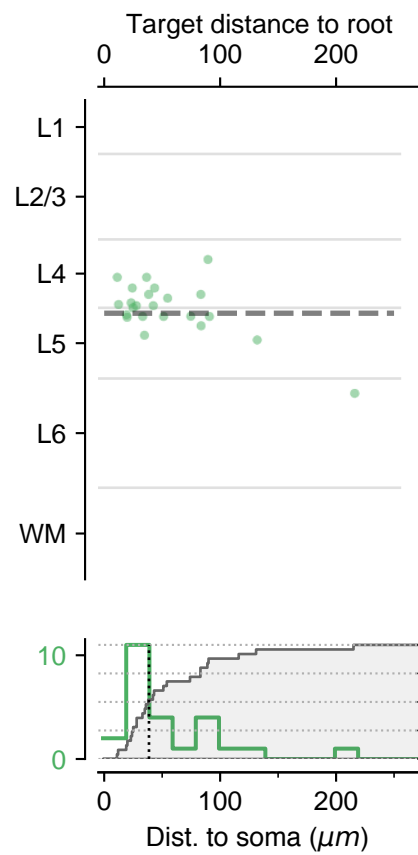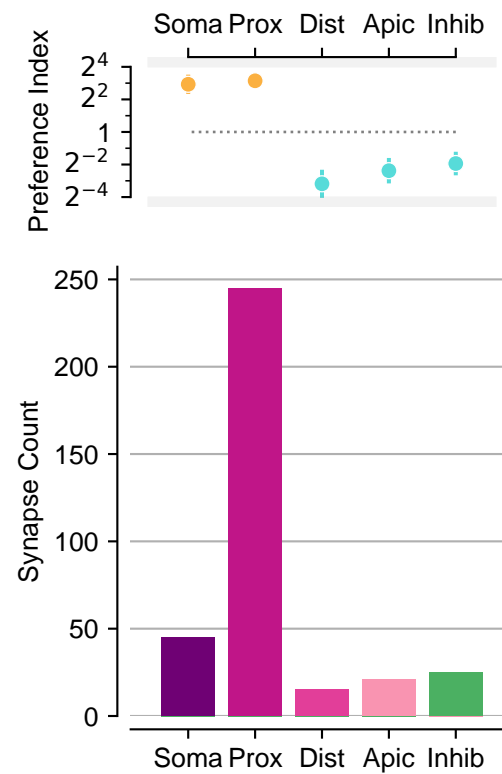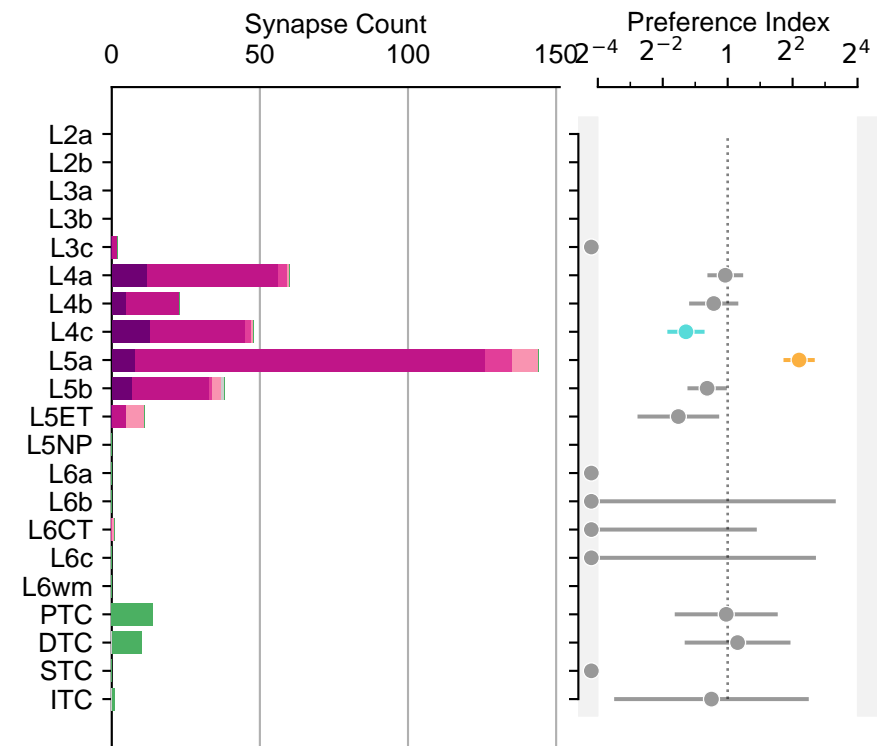

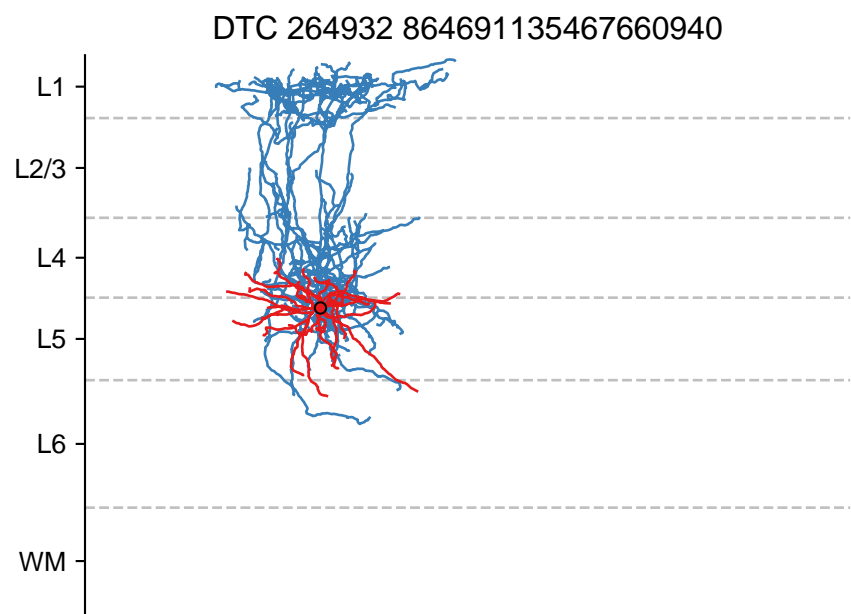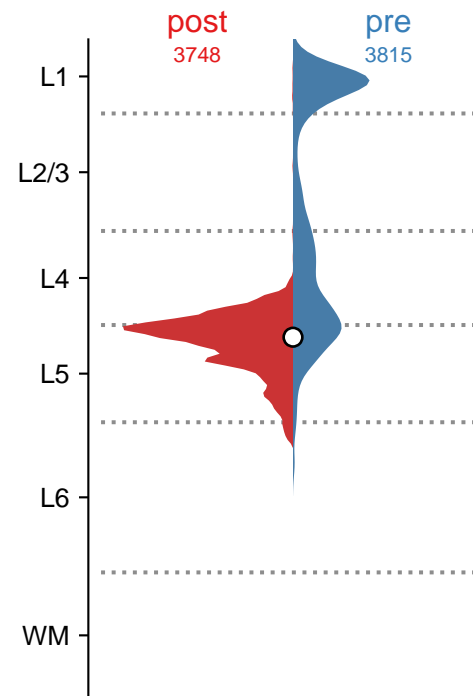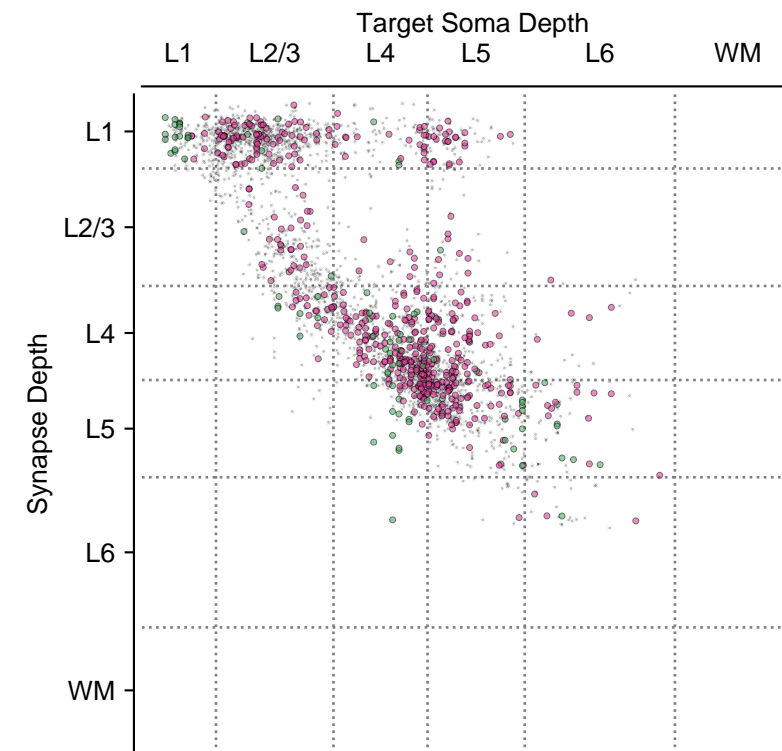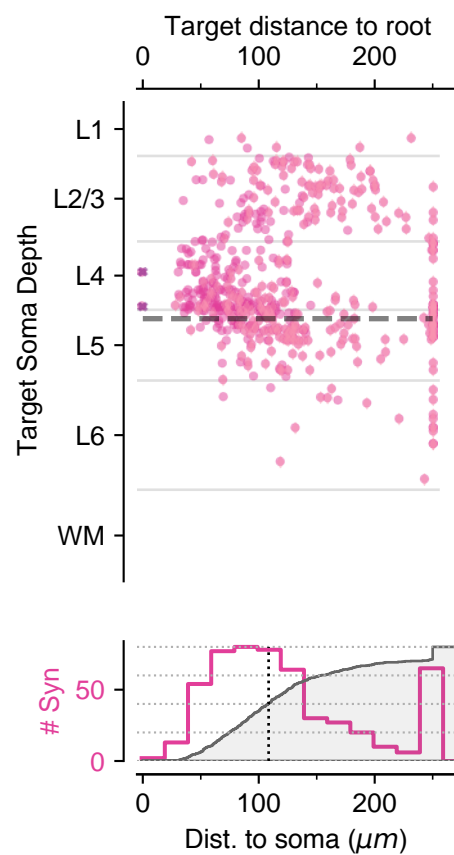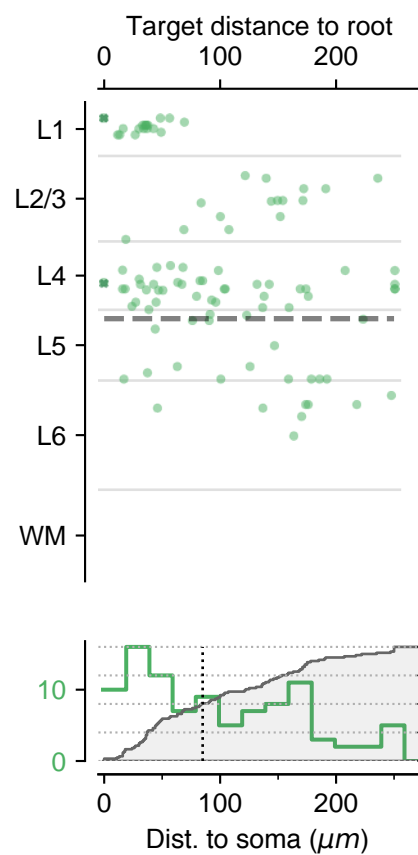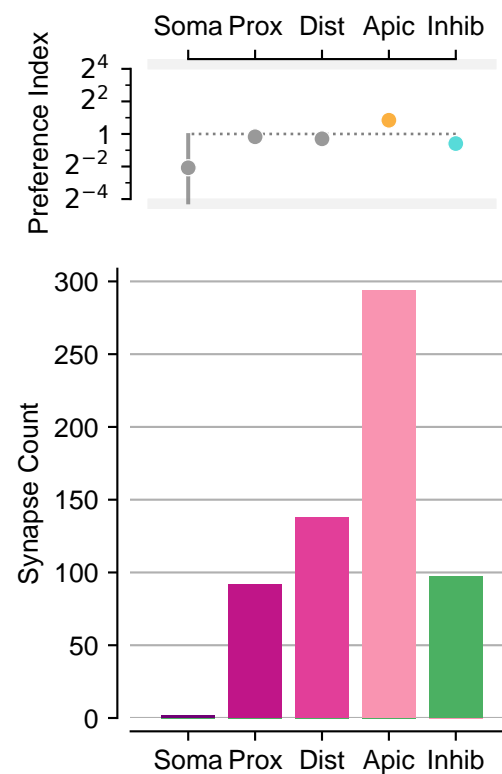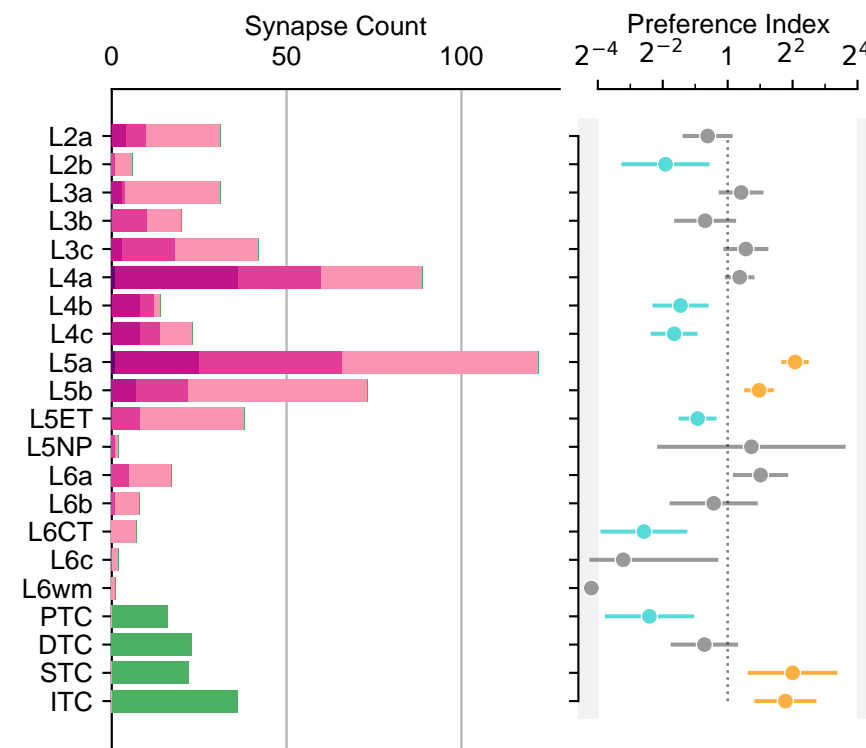

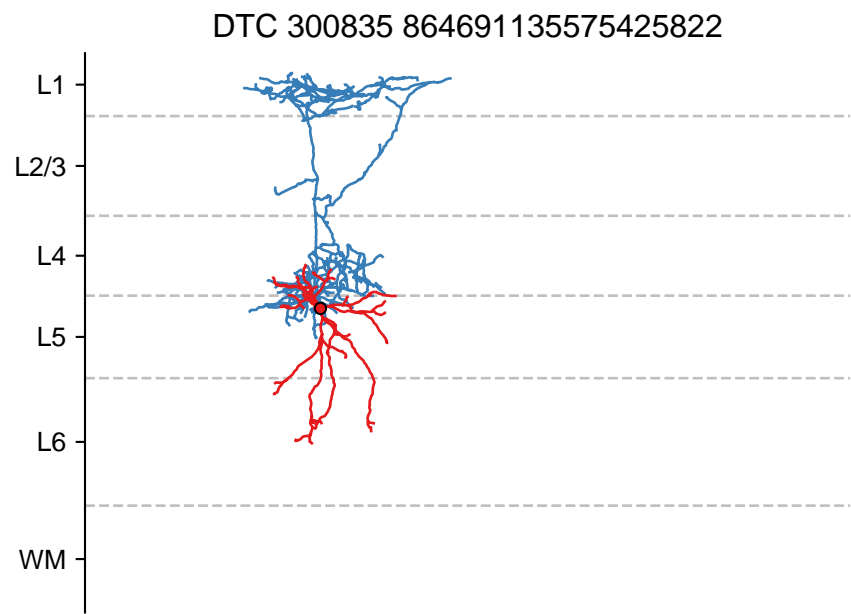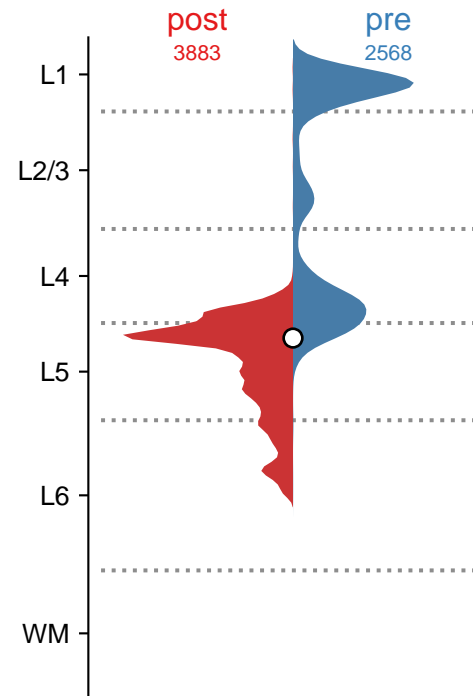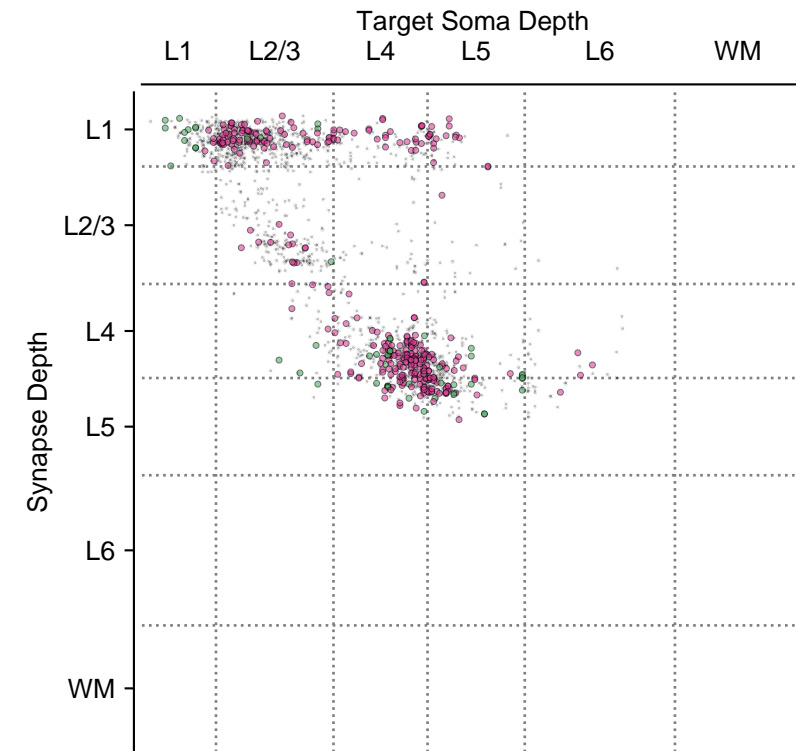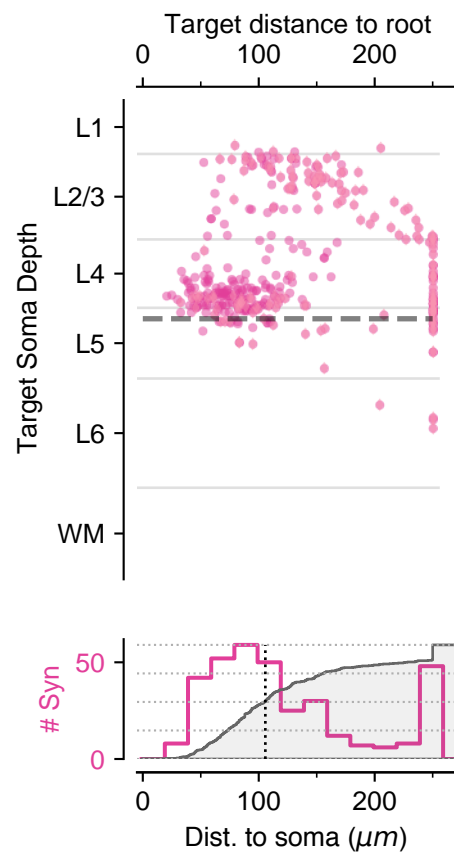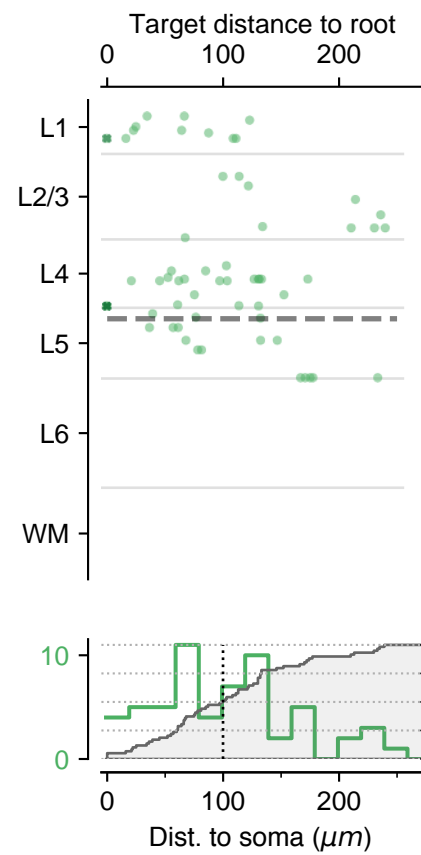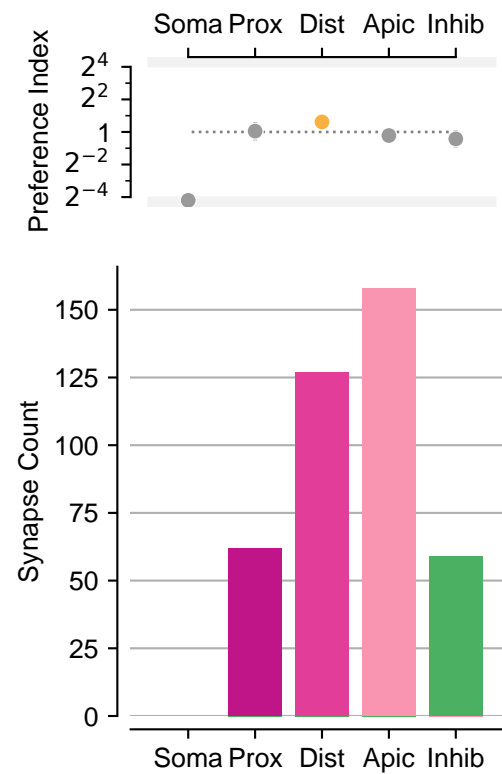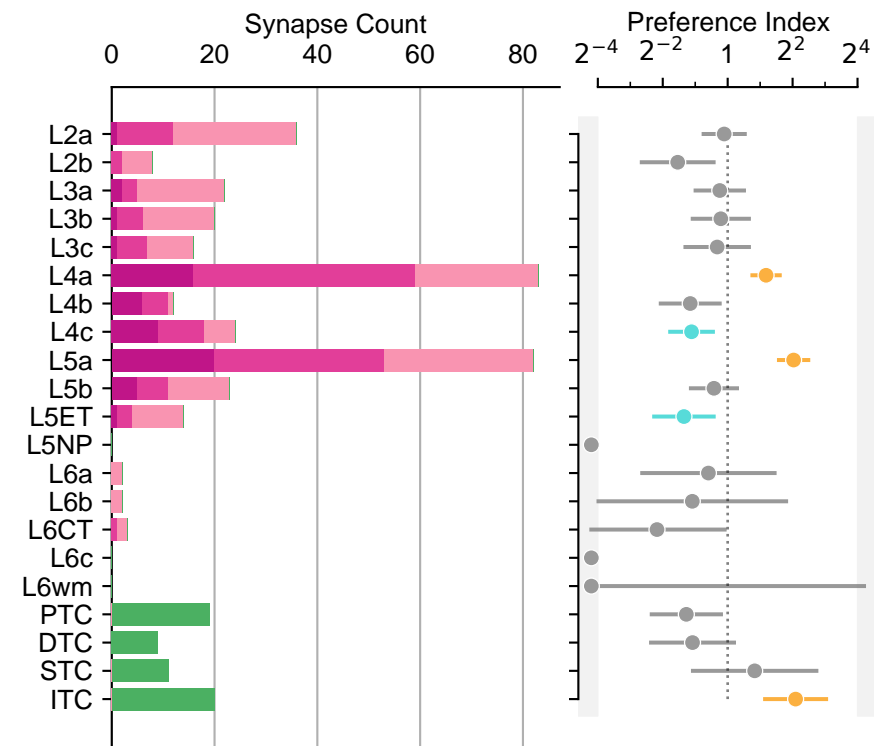

# Group 9

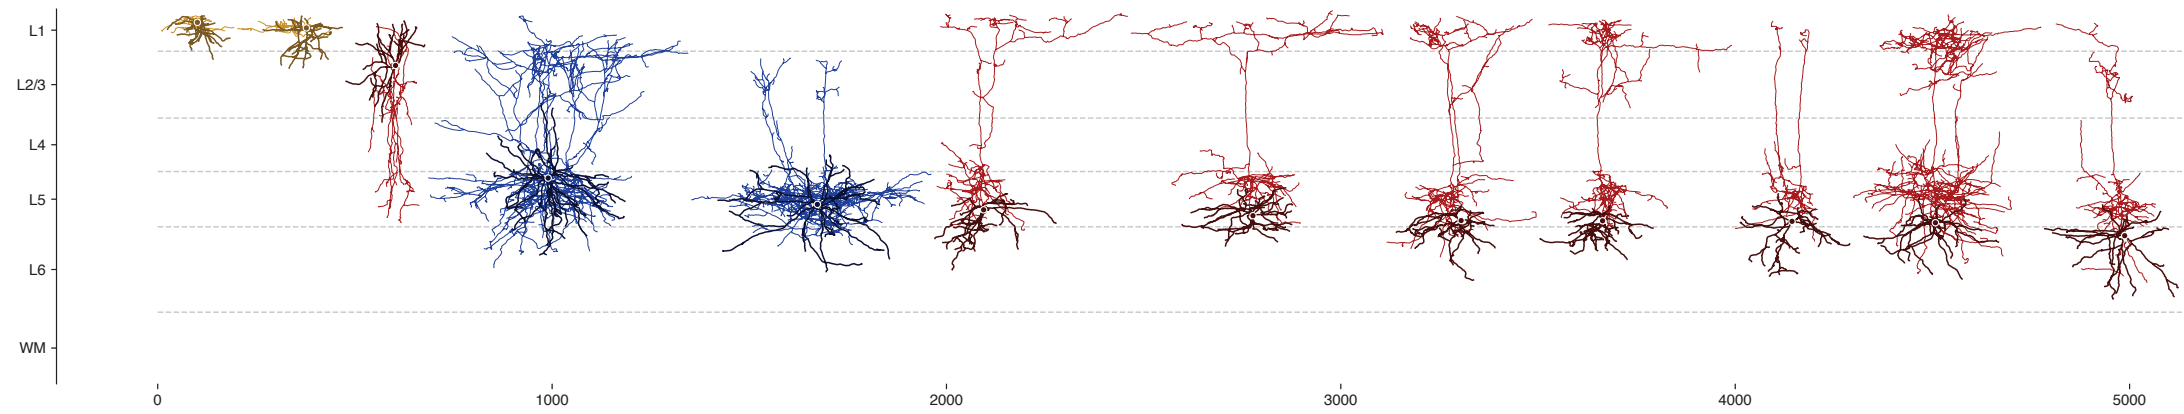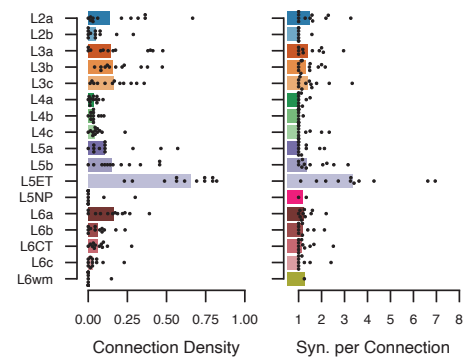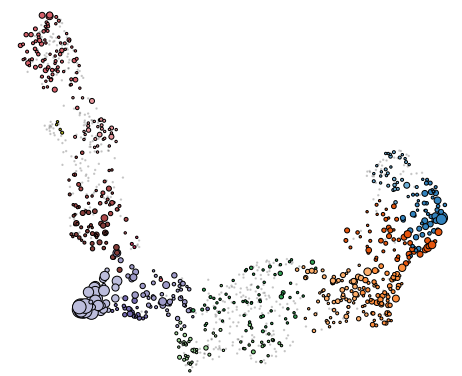

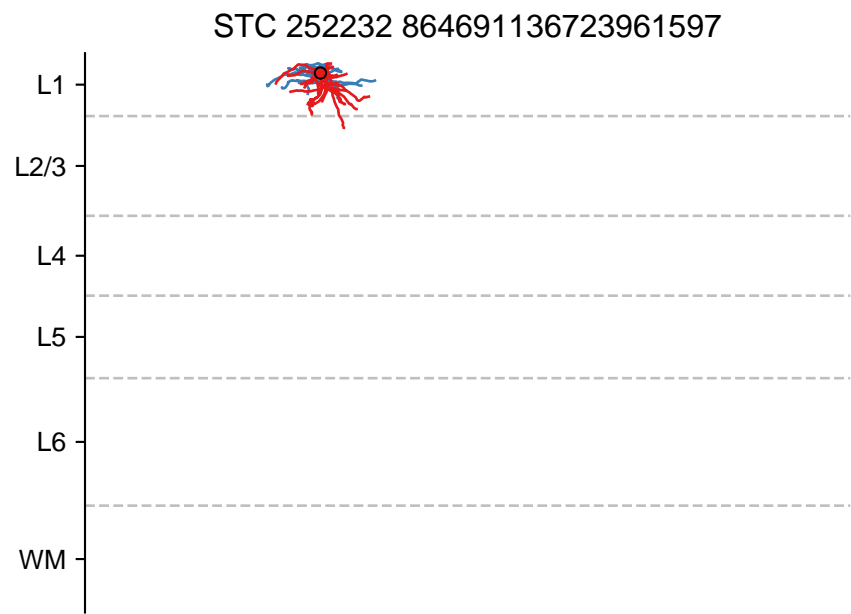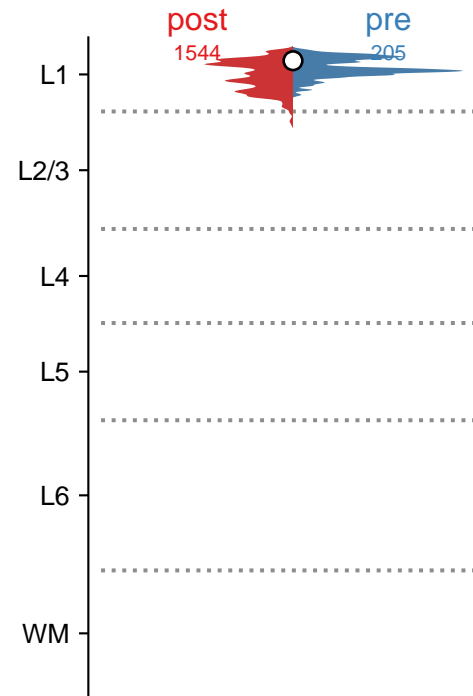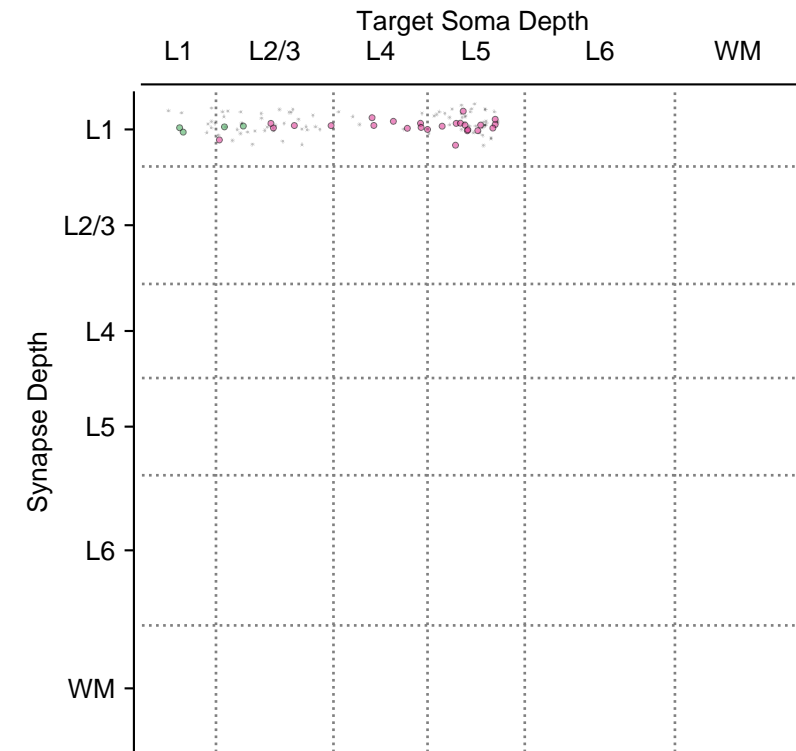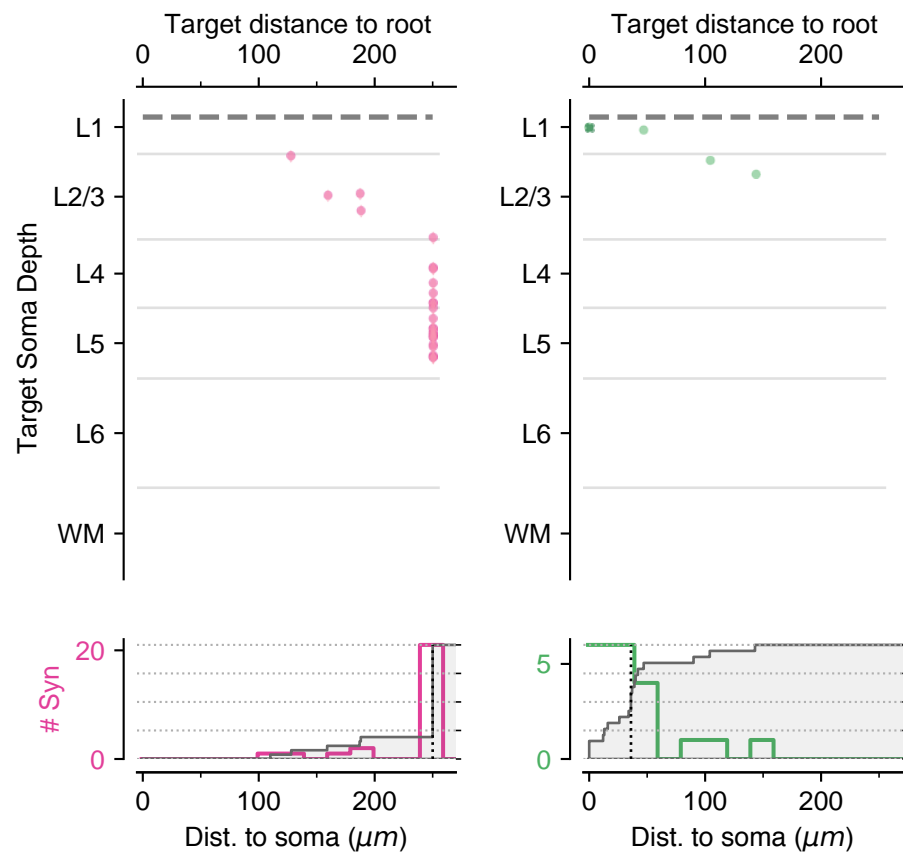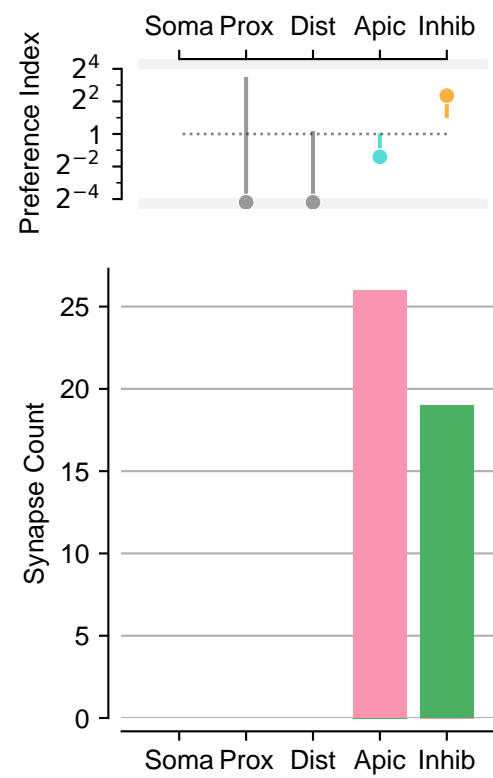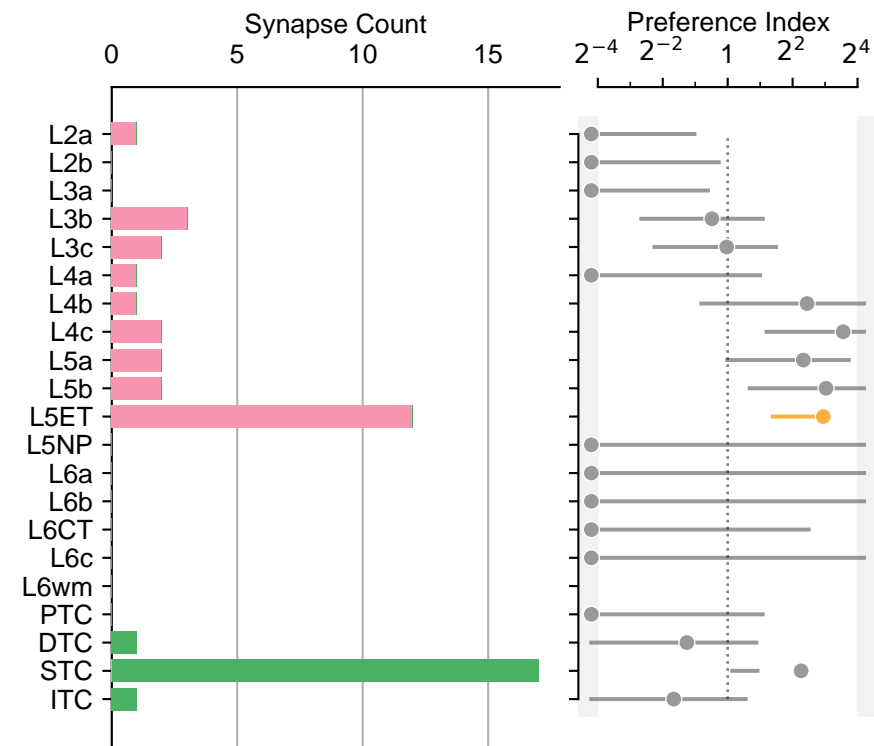



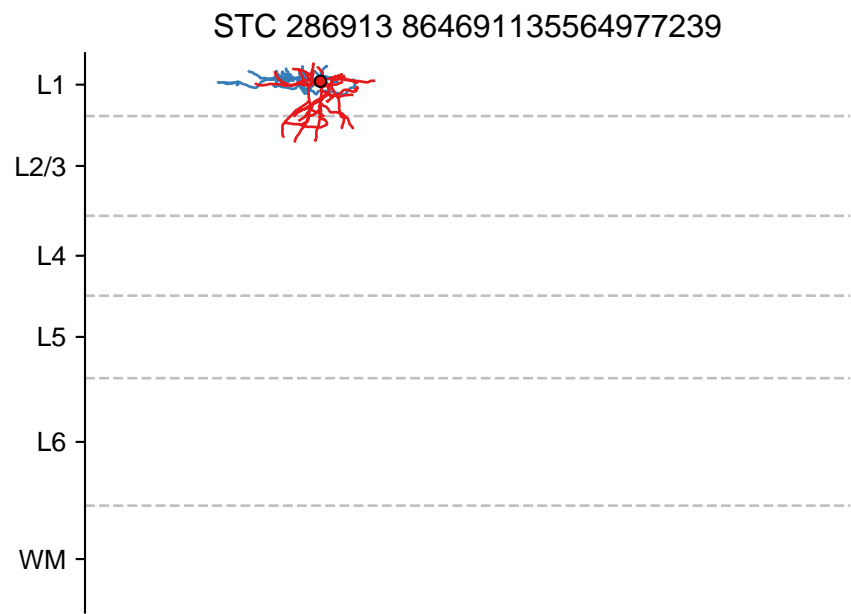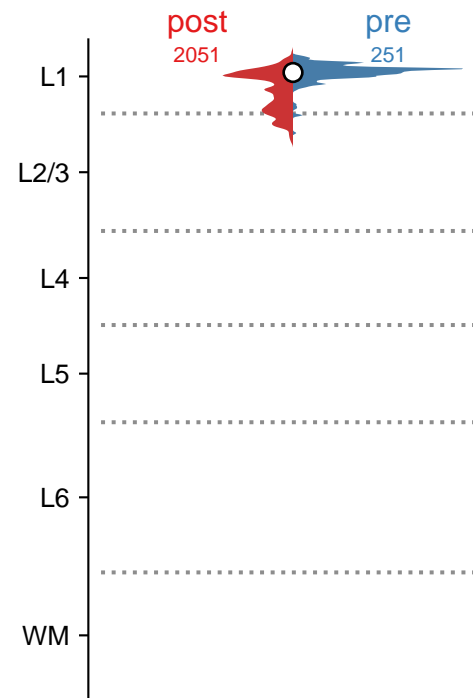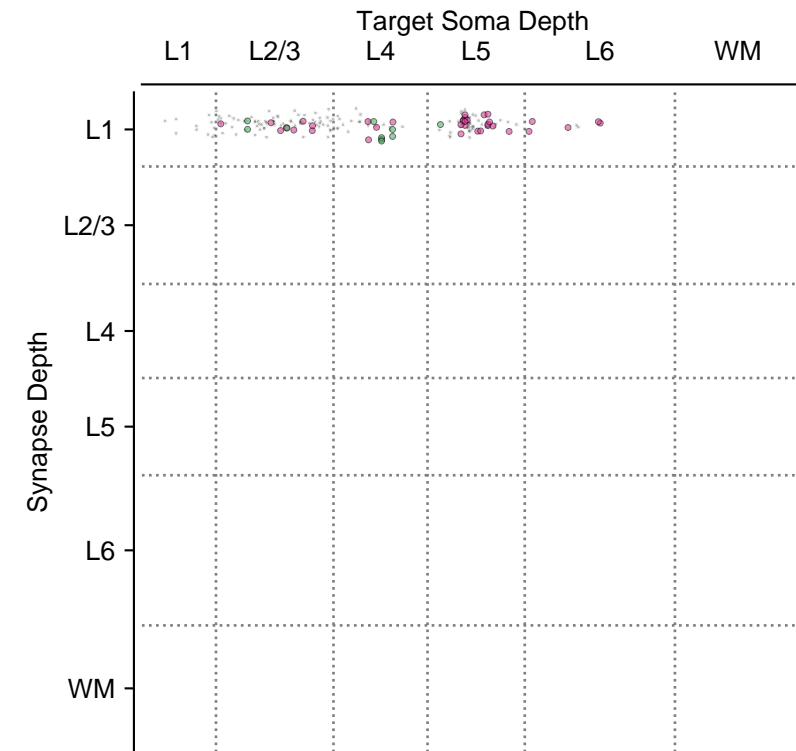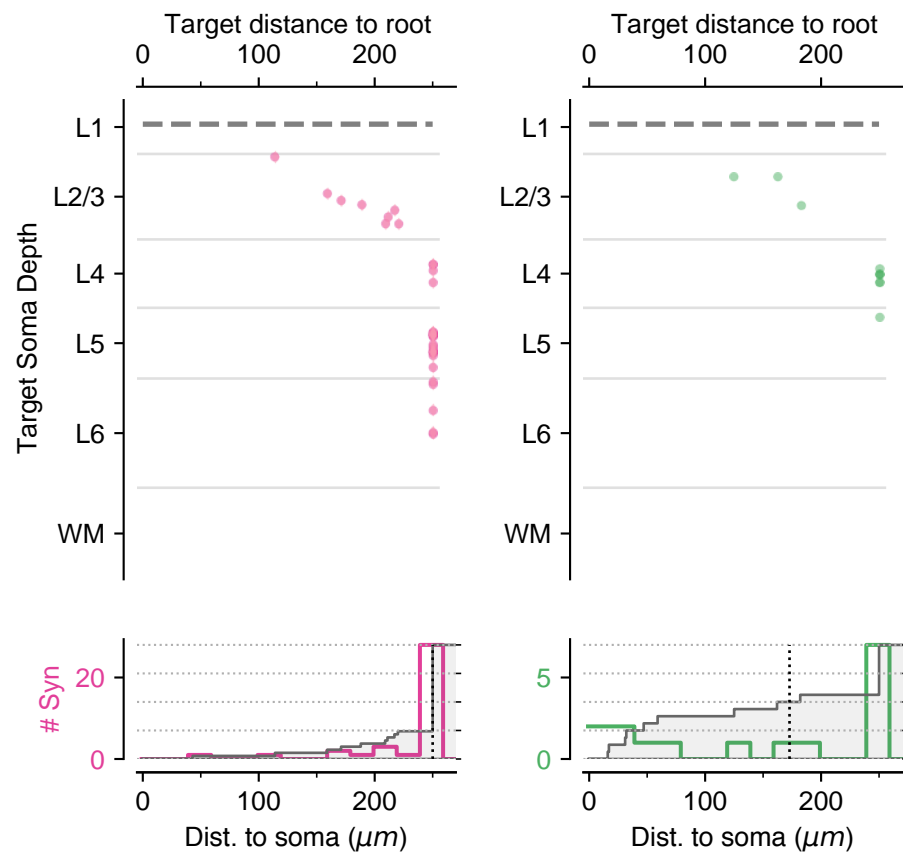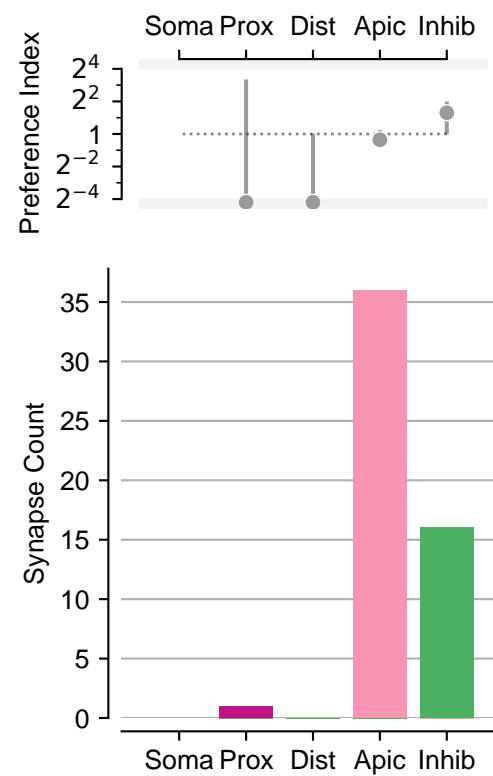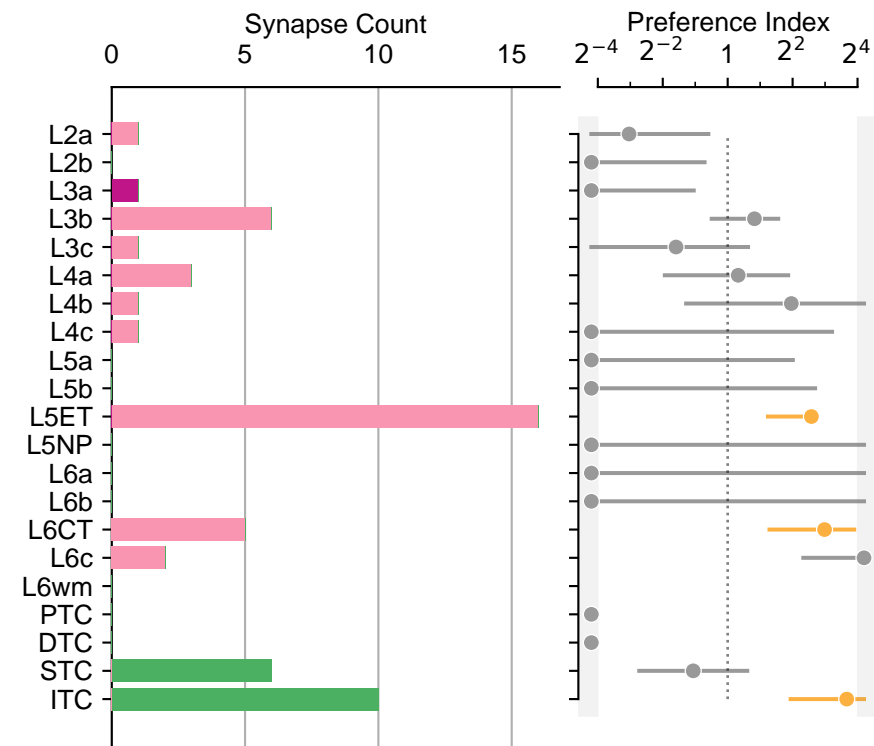

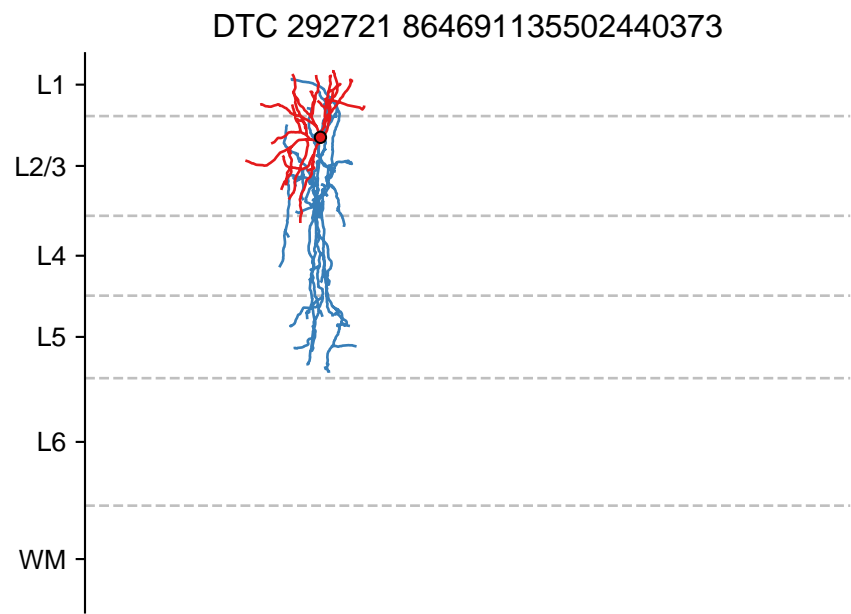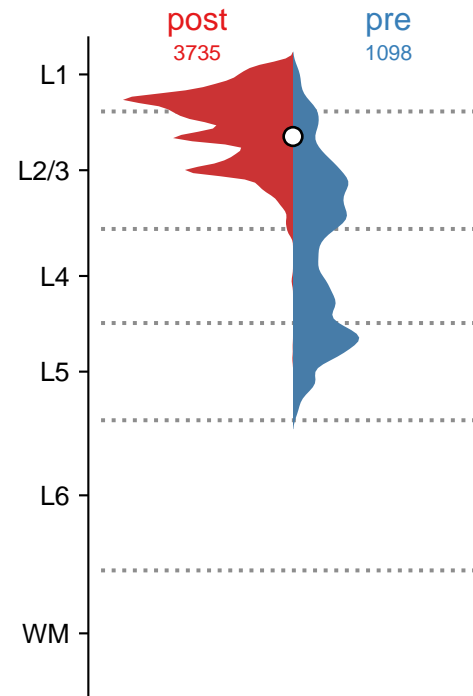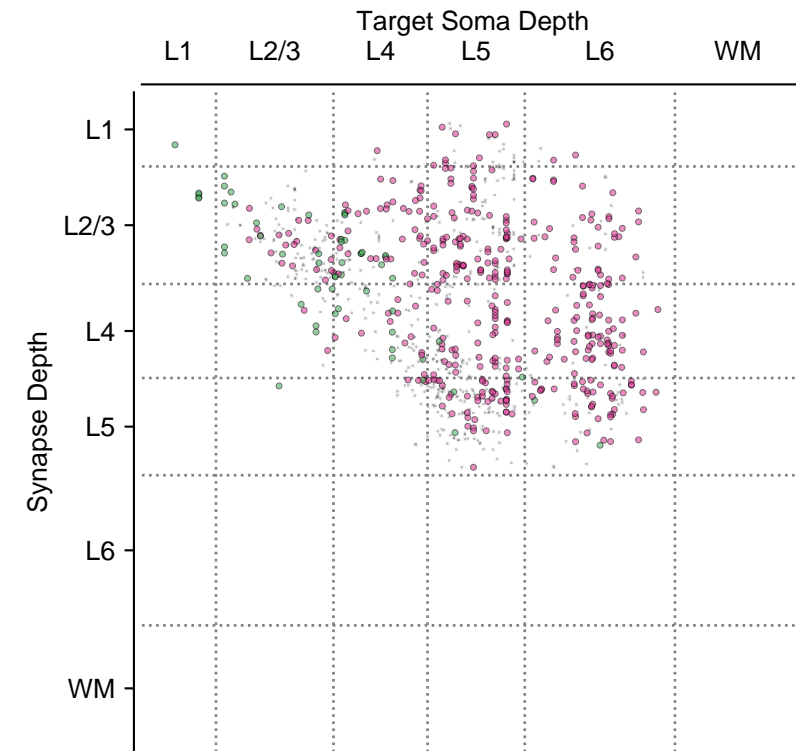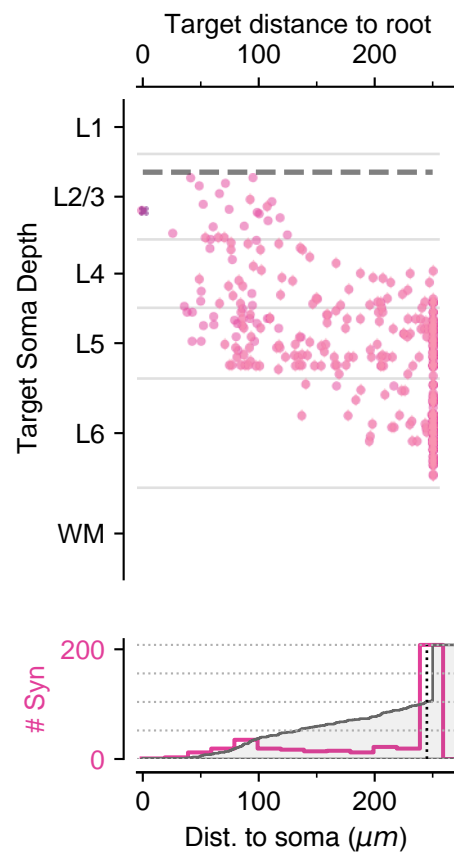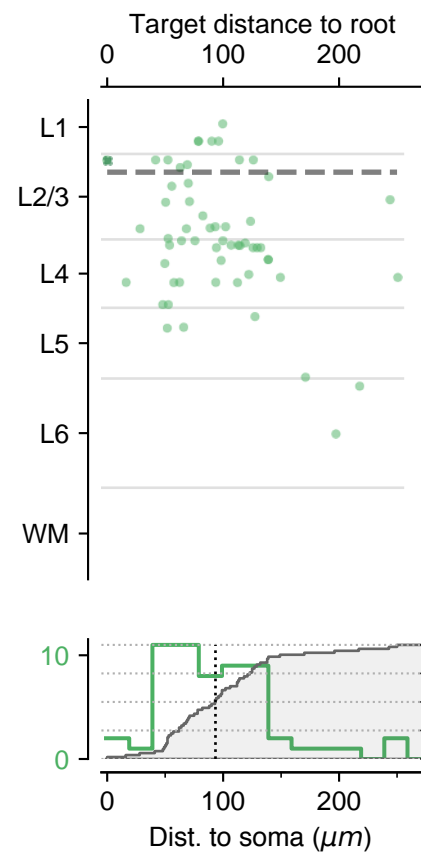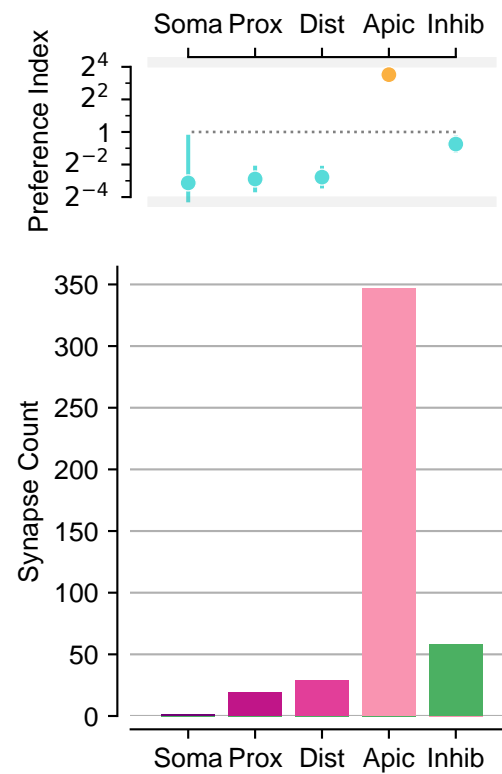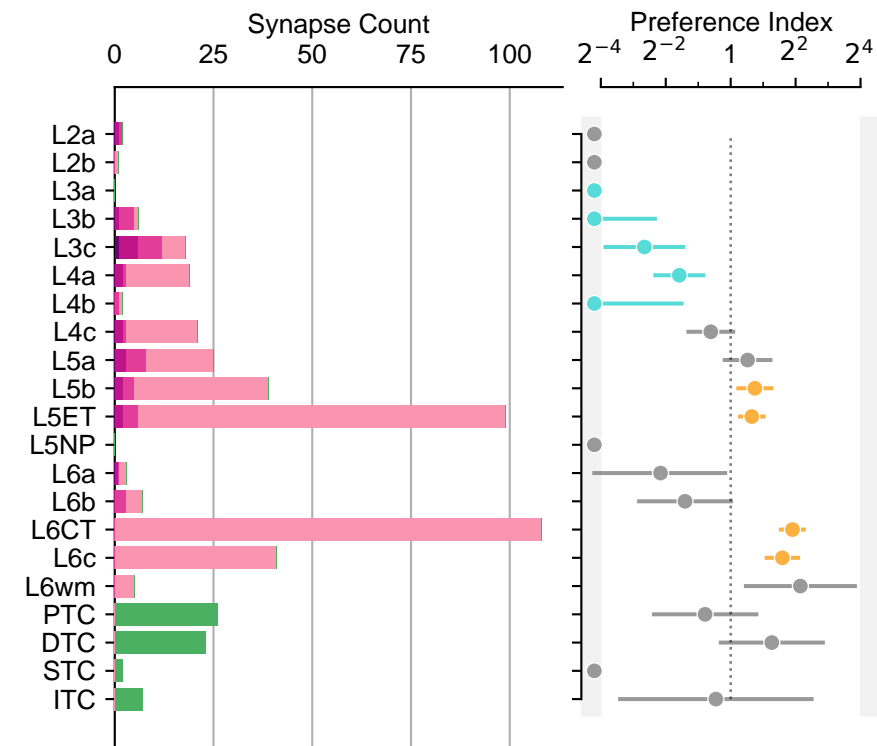

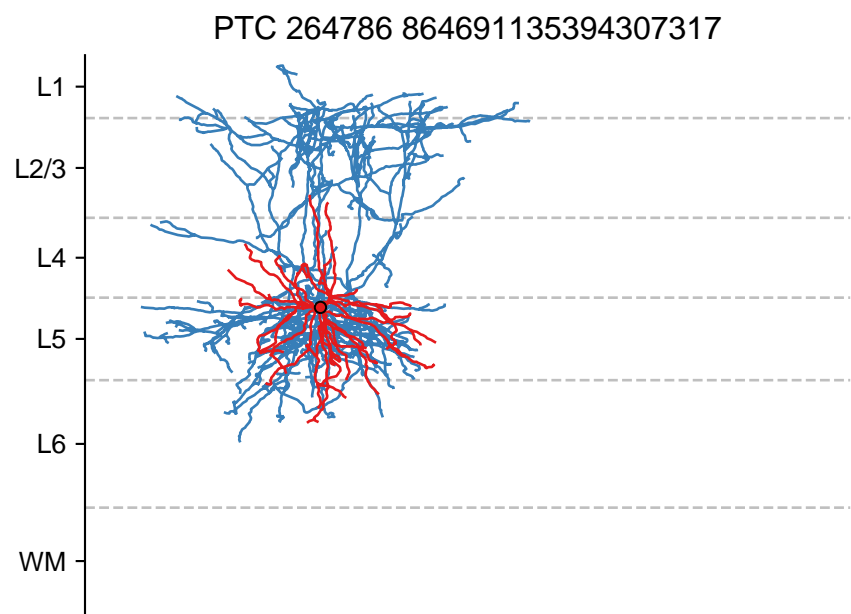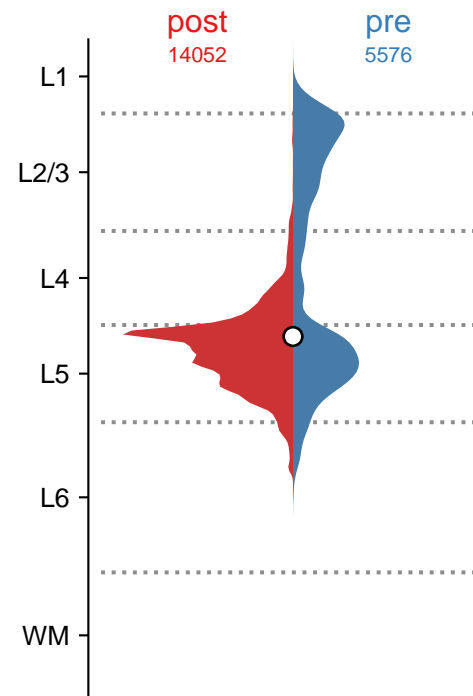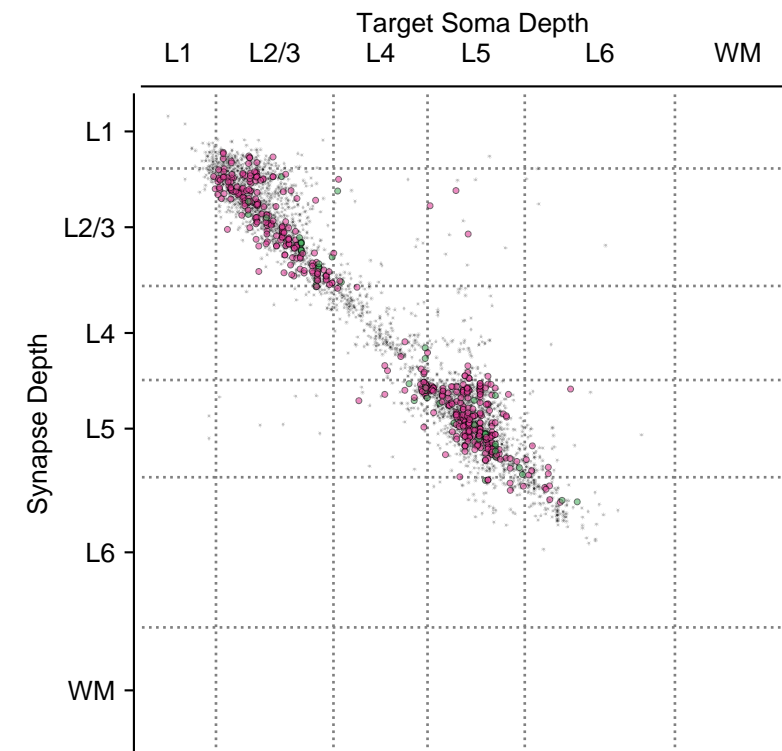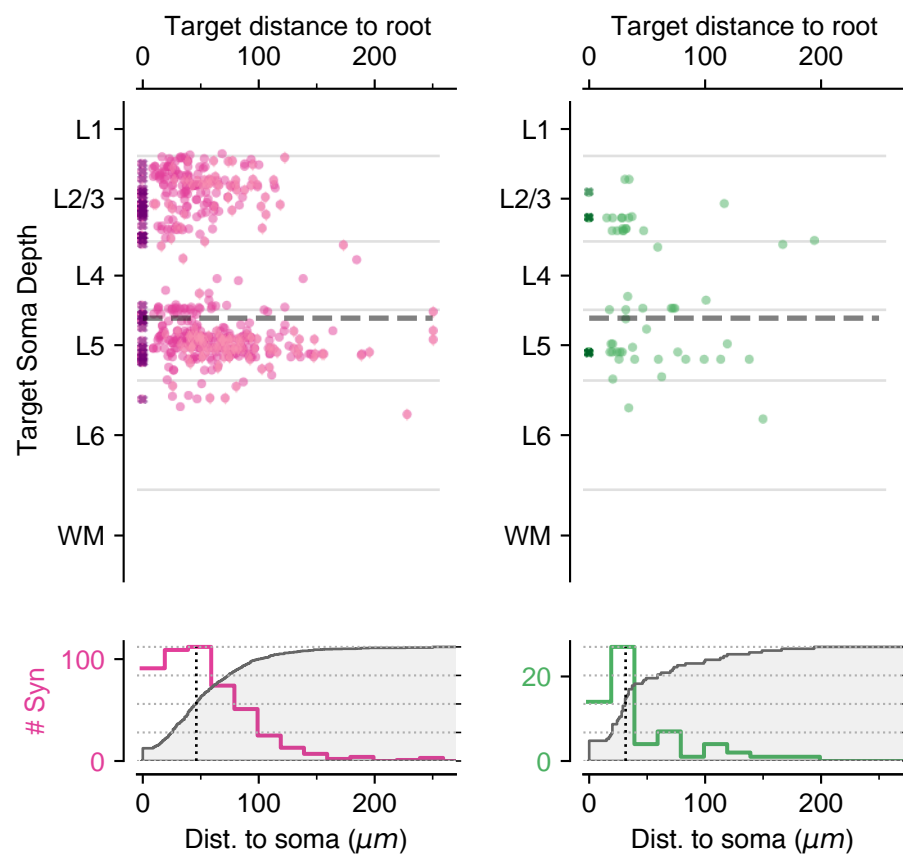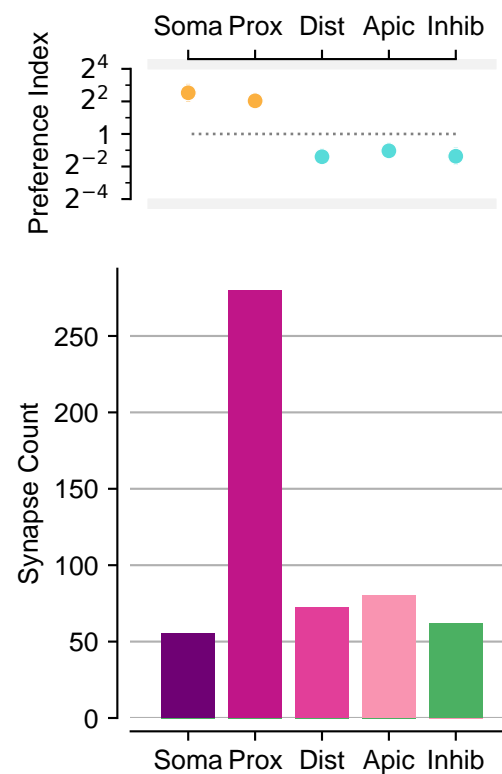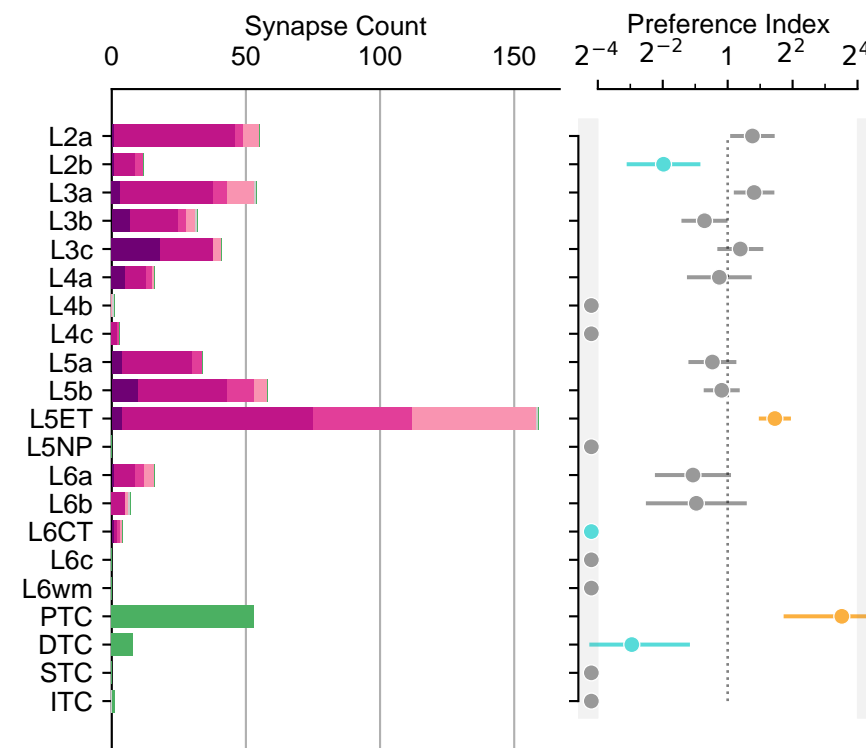

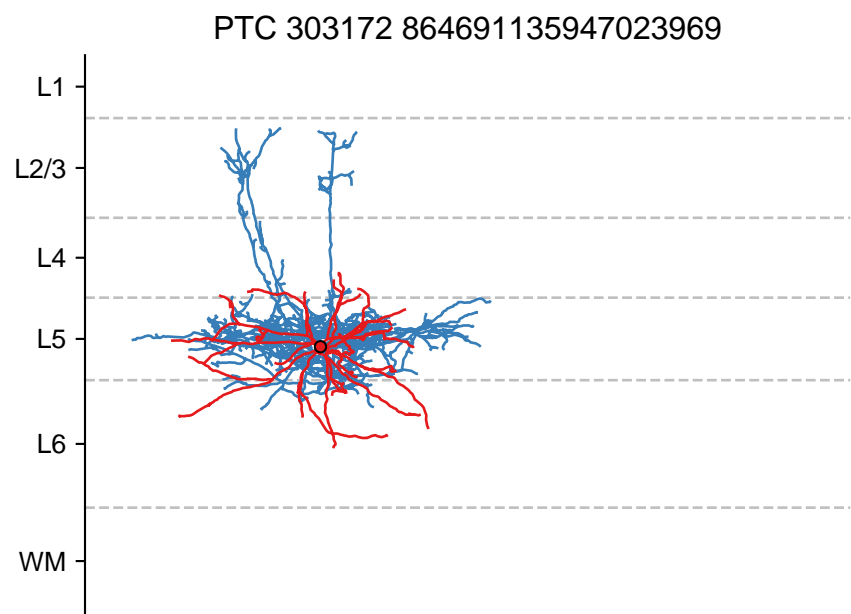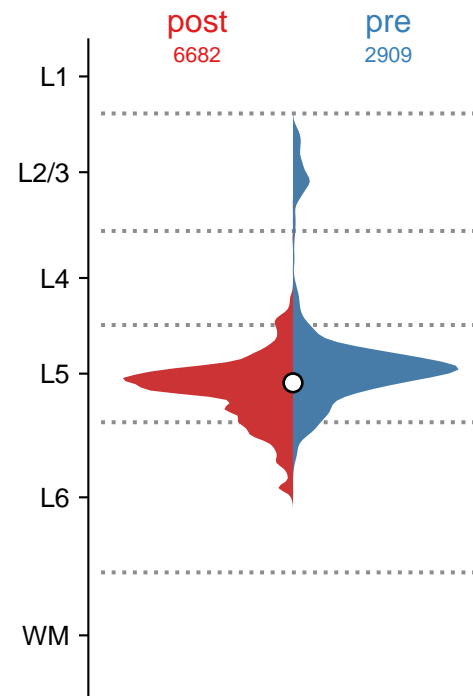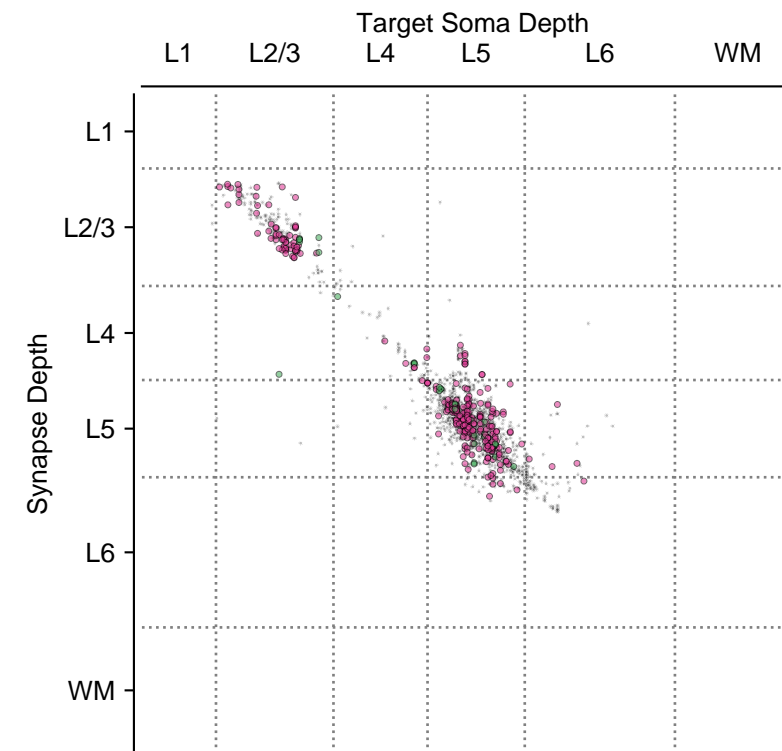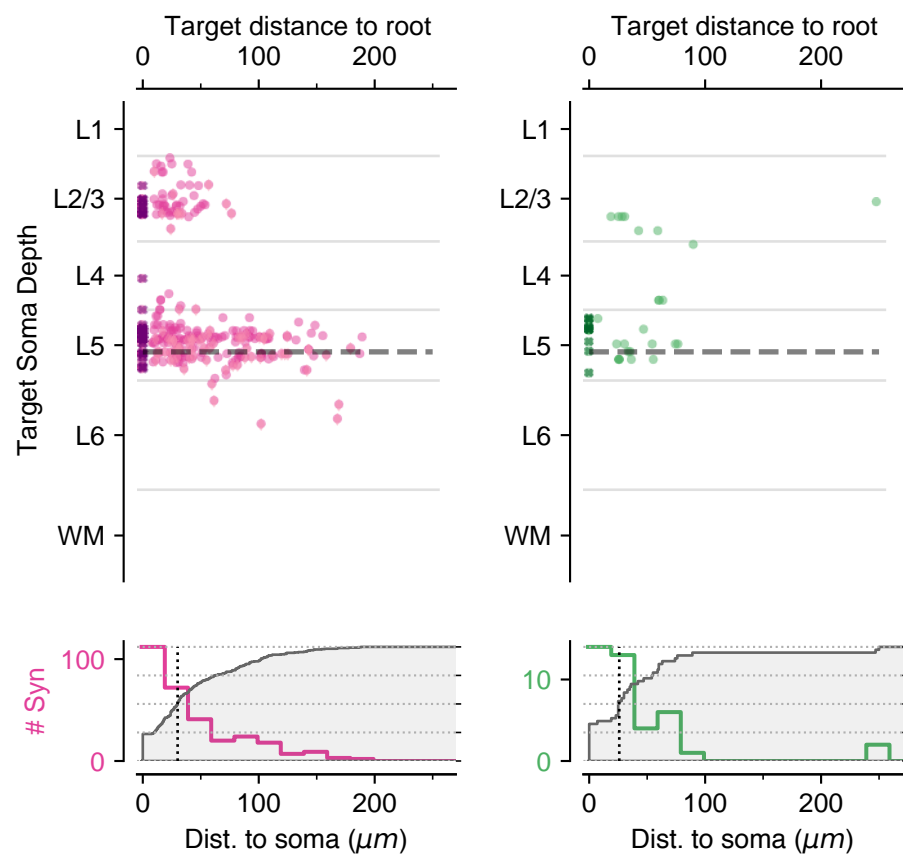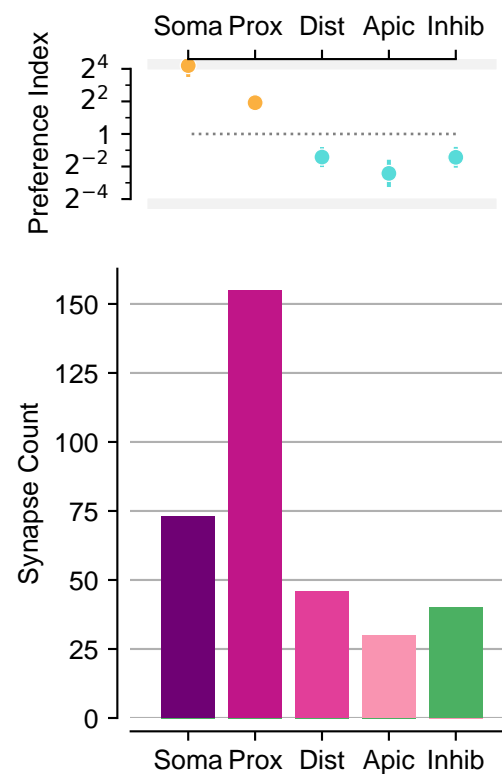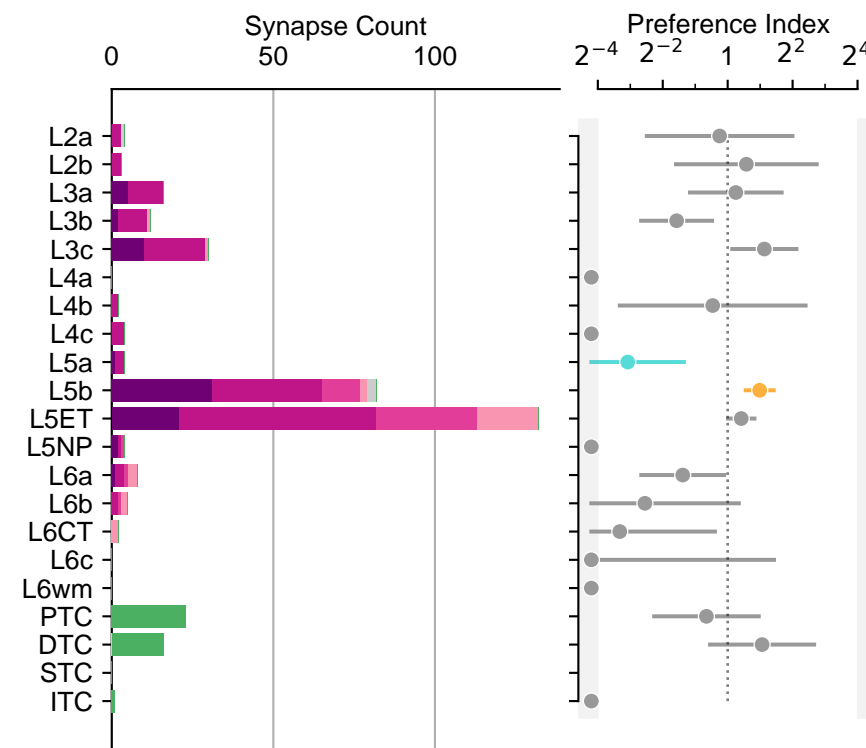

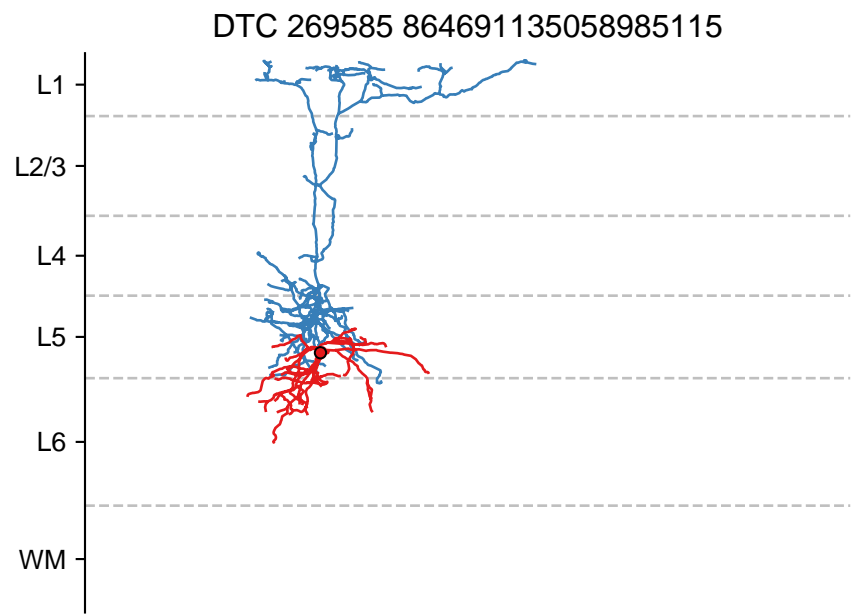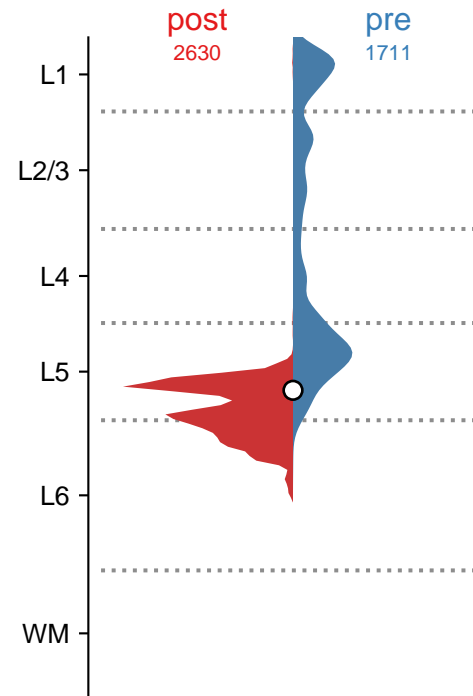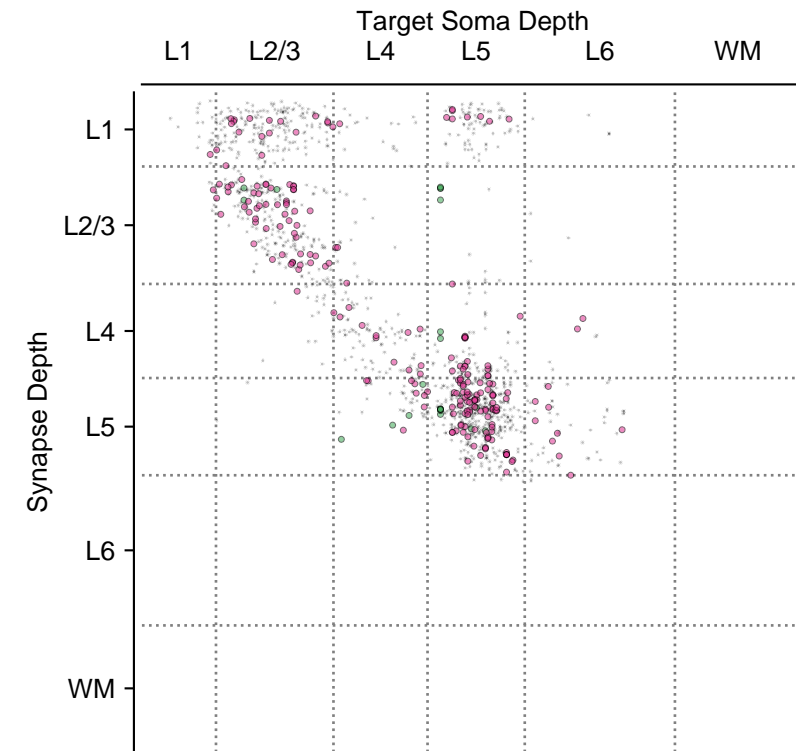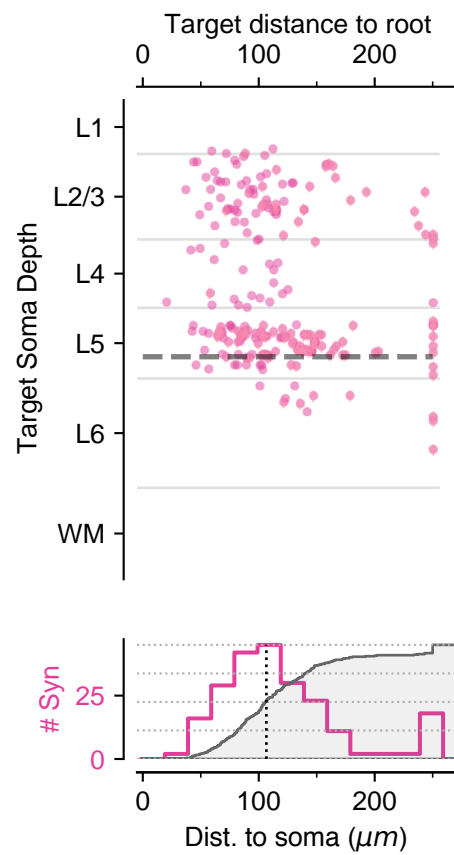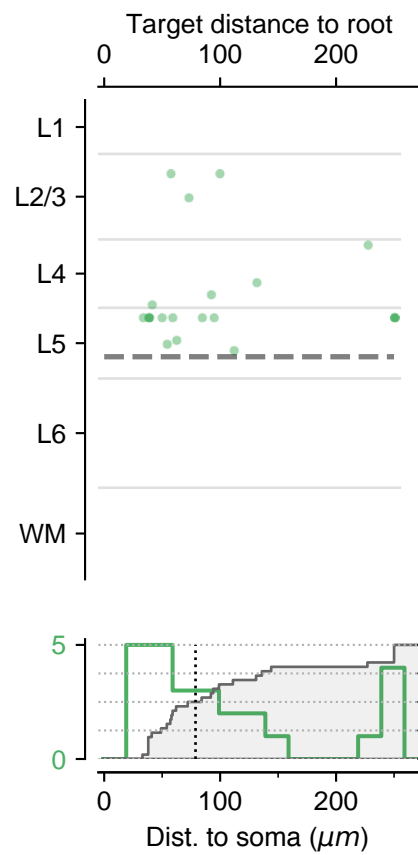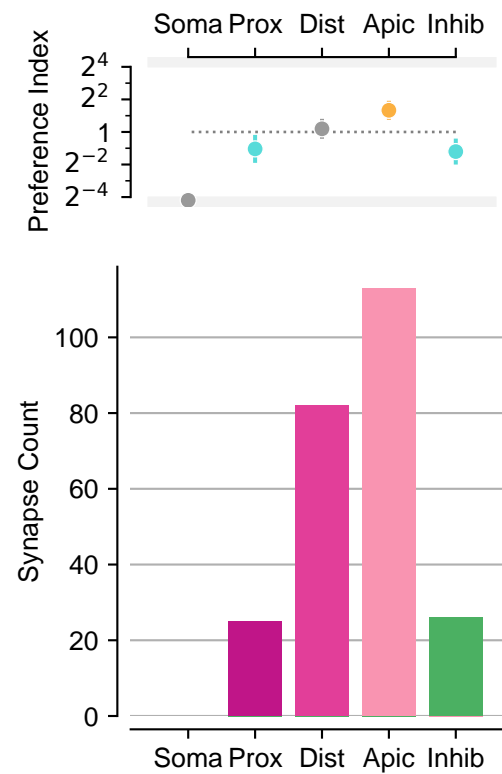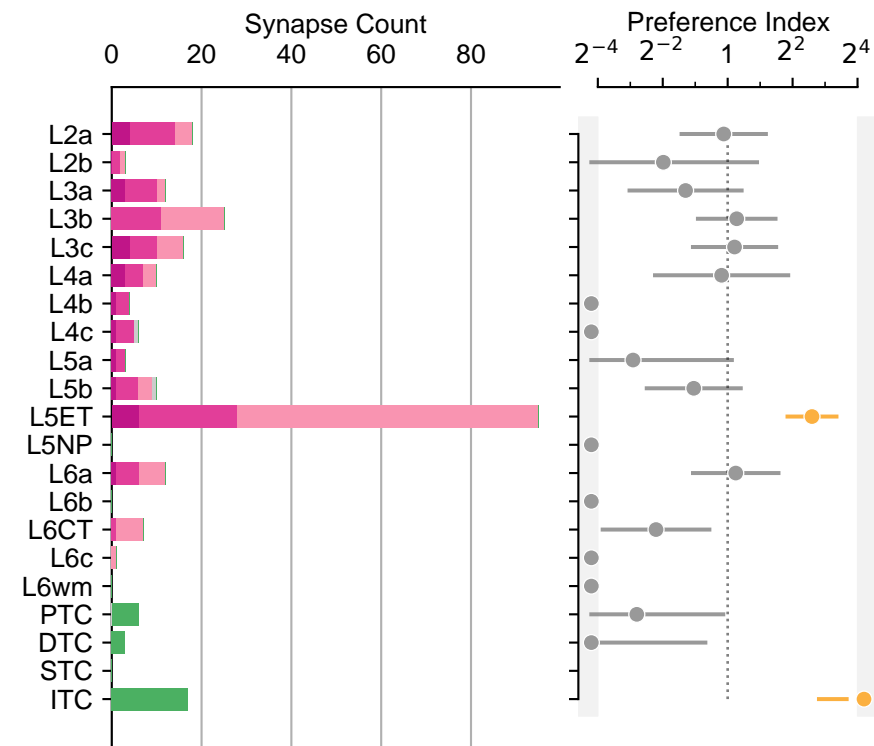

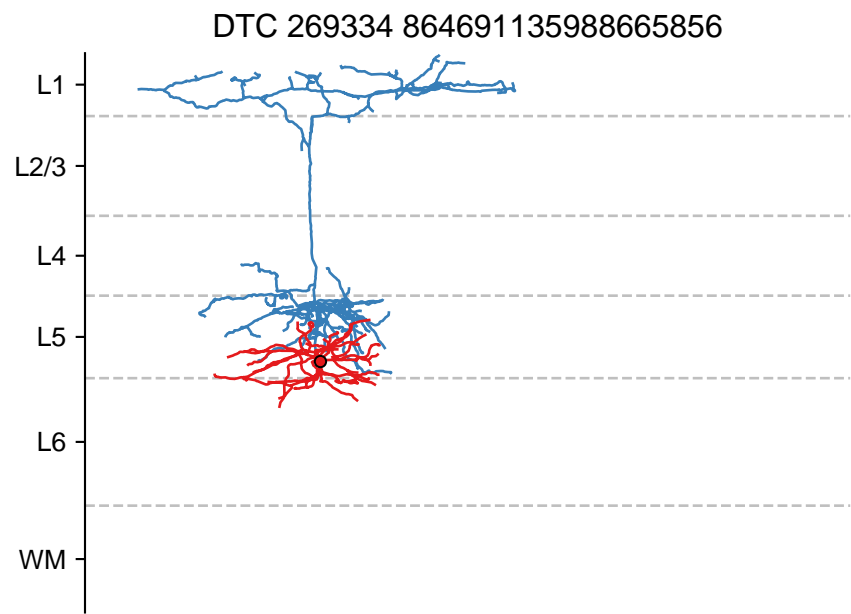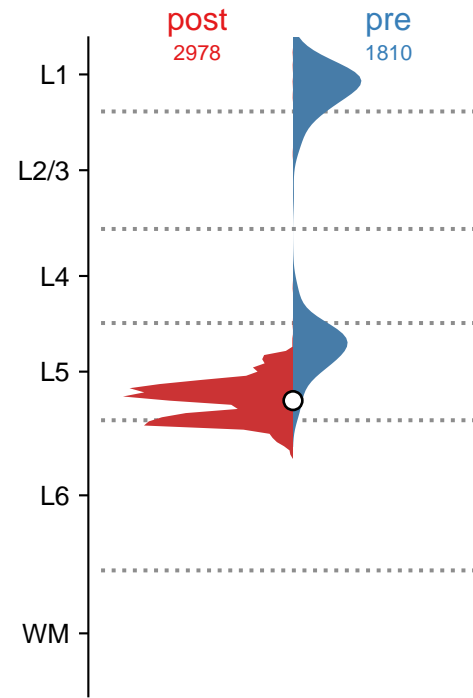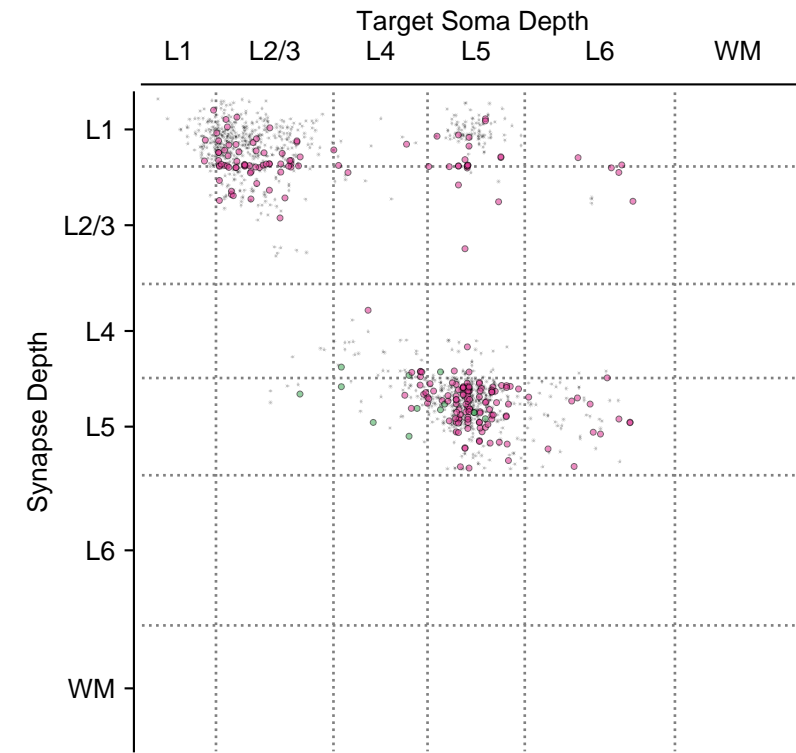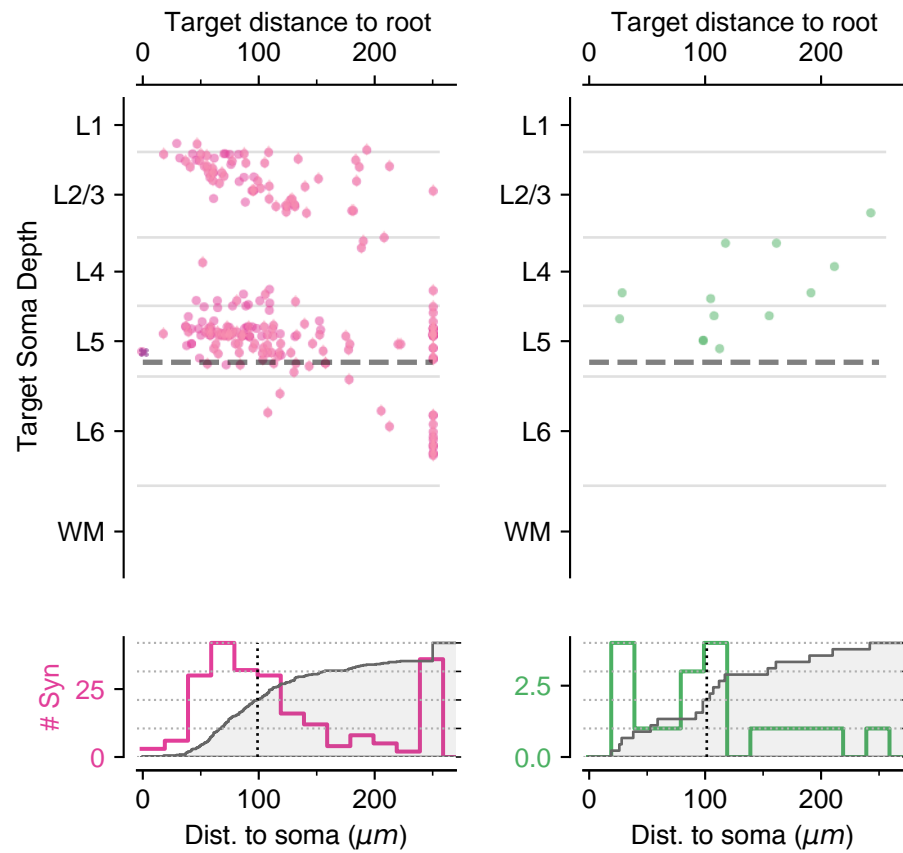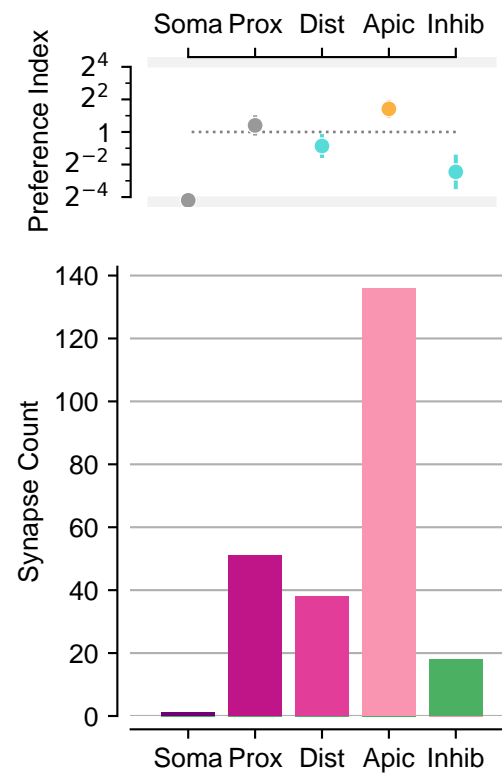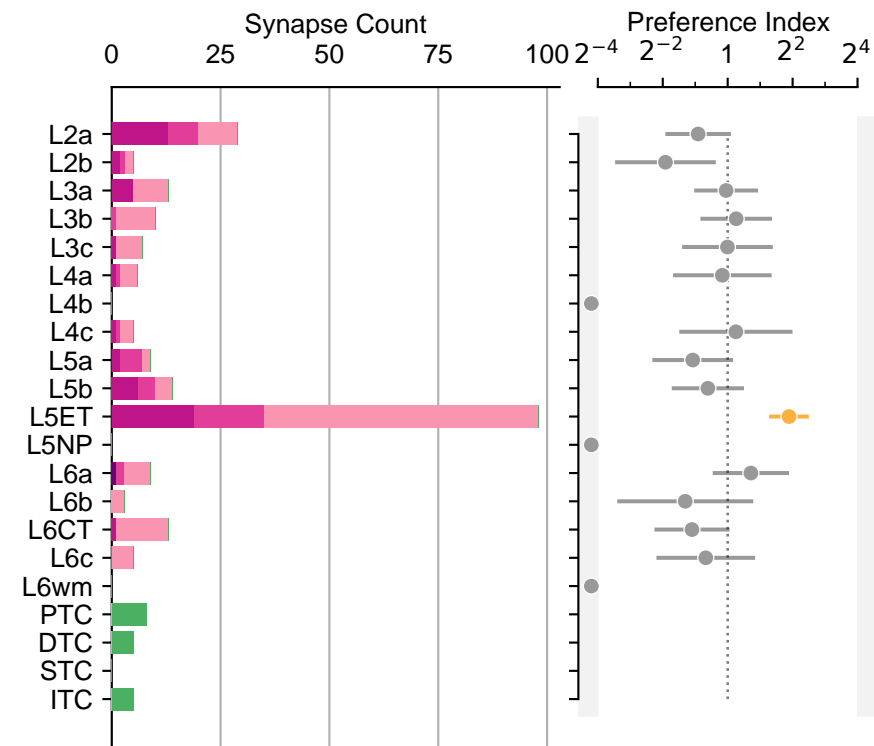

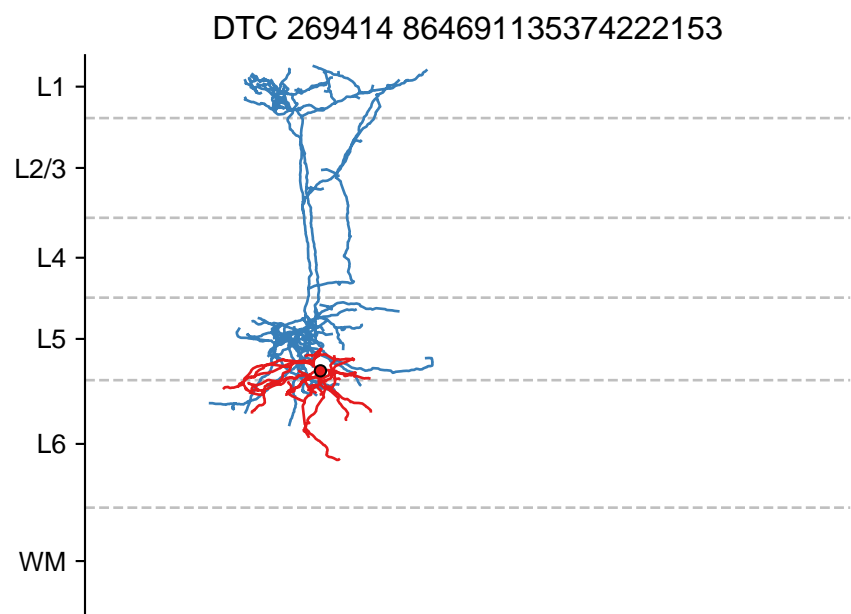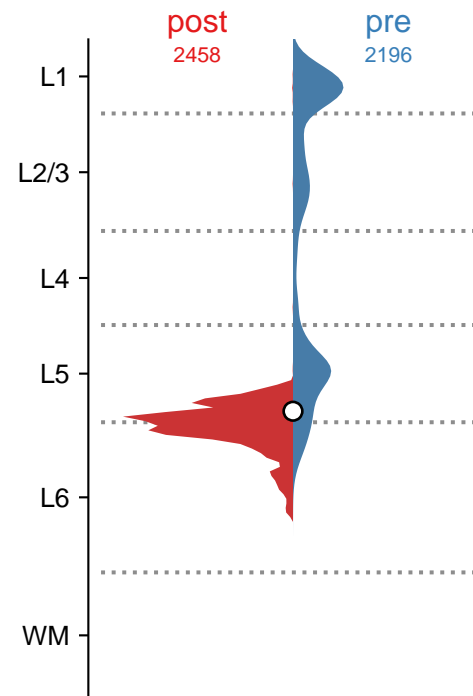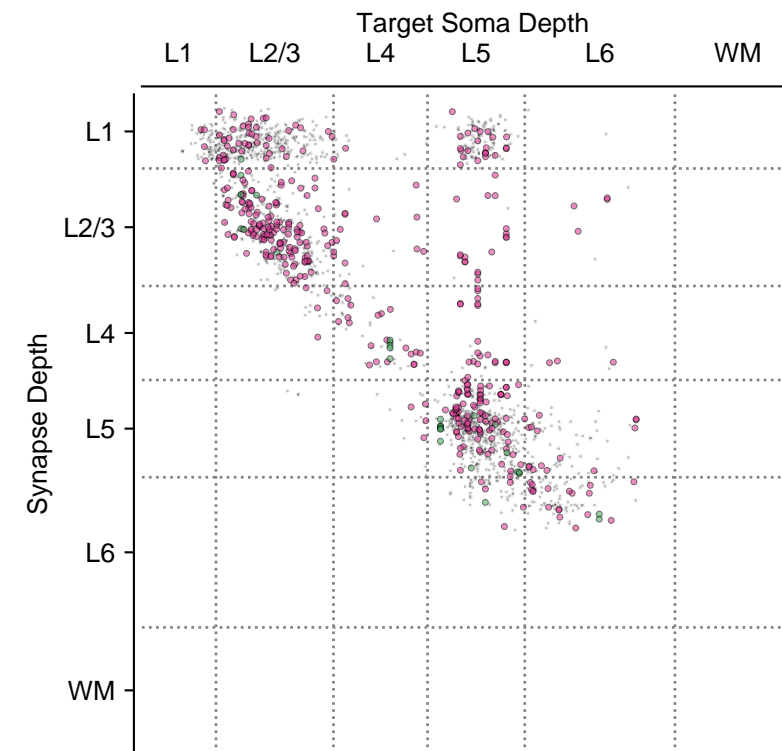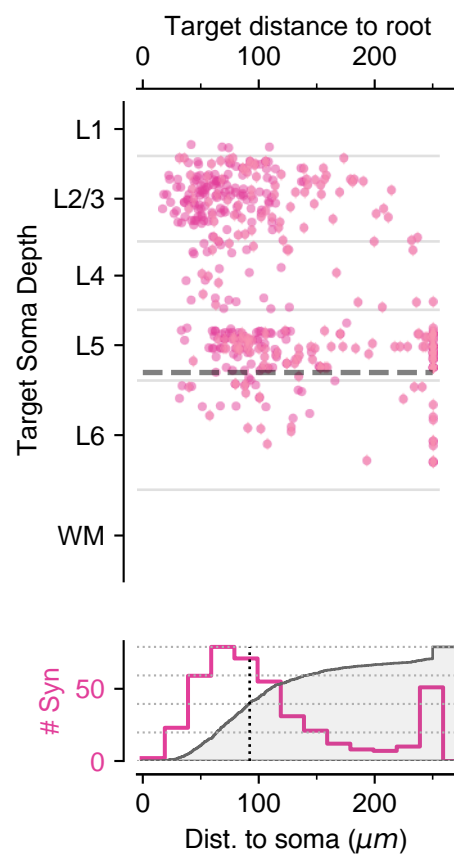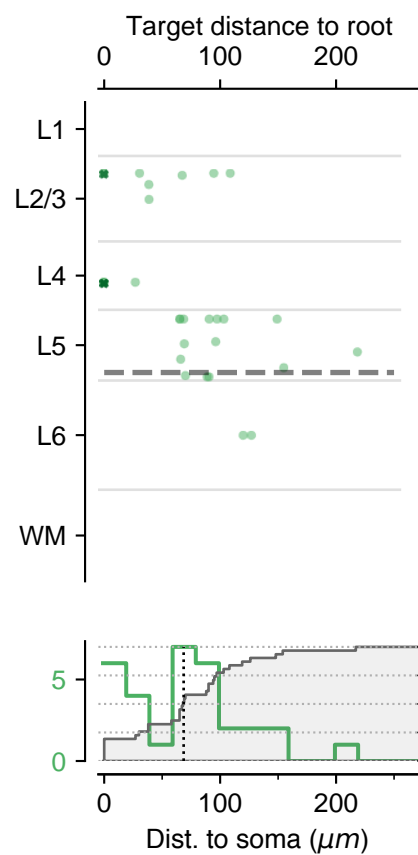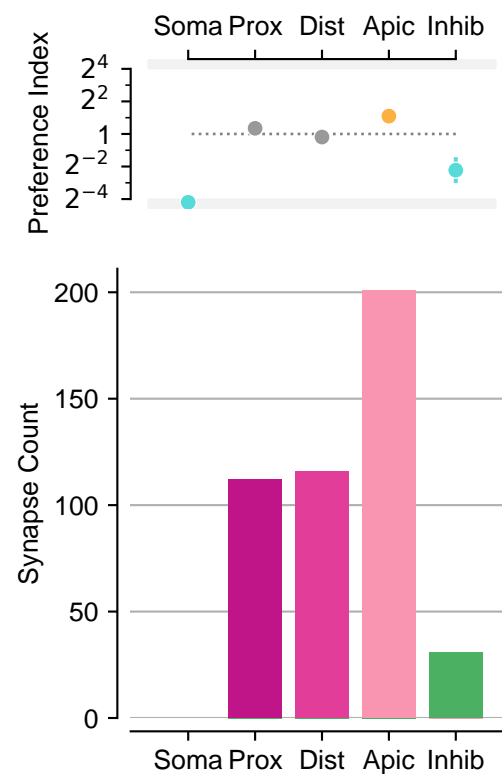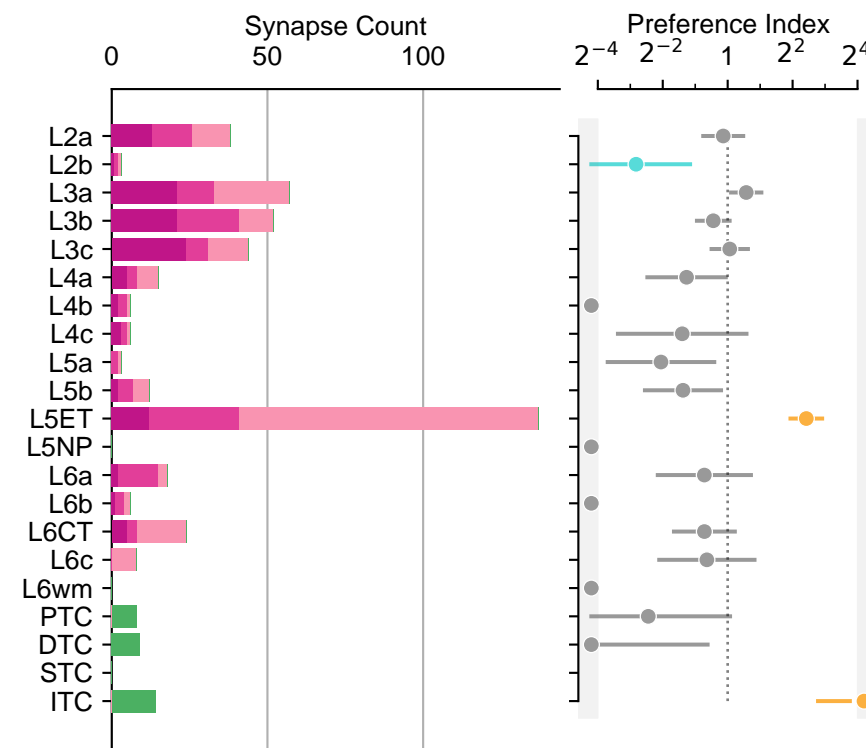

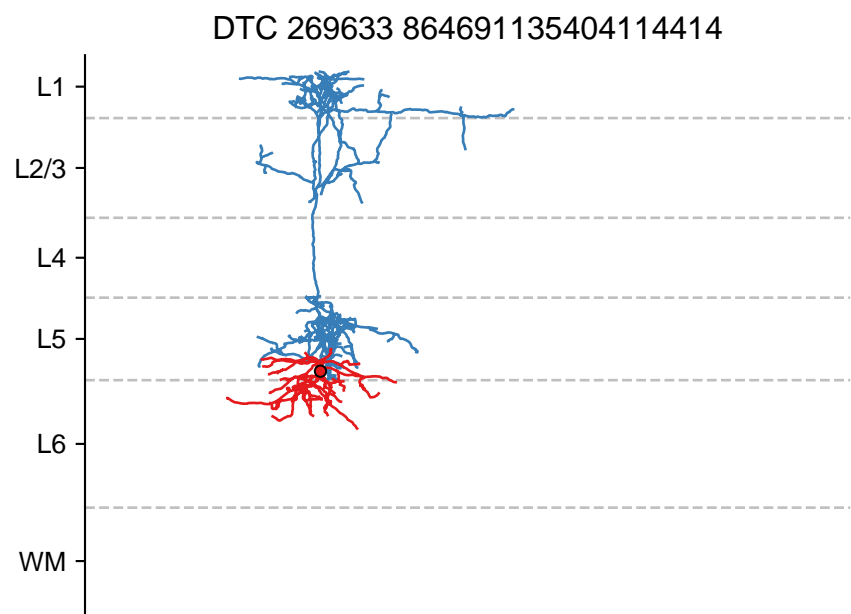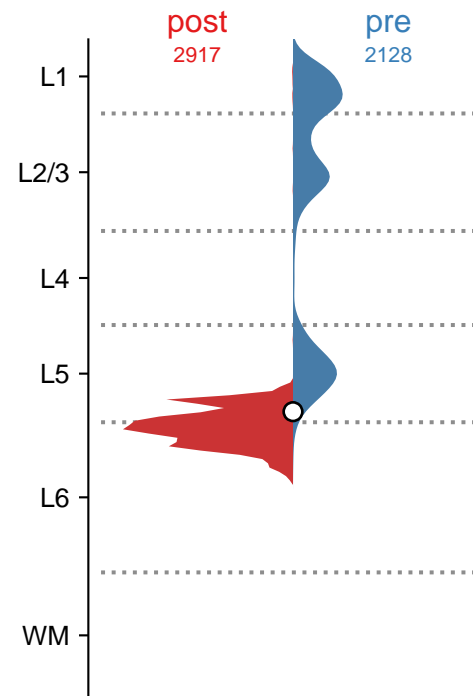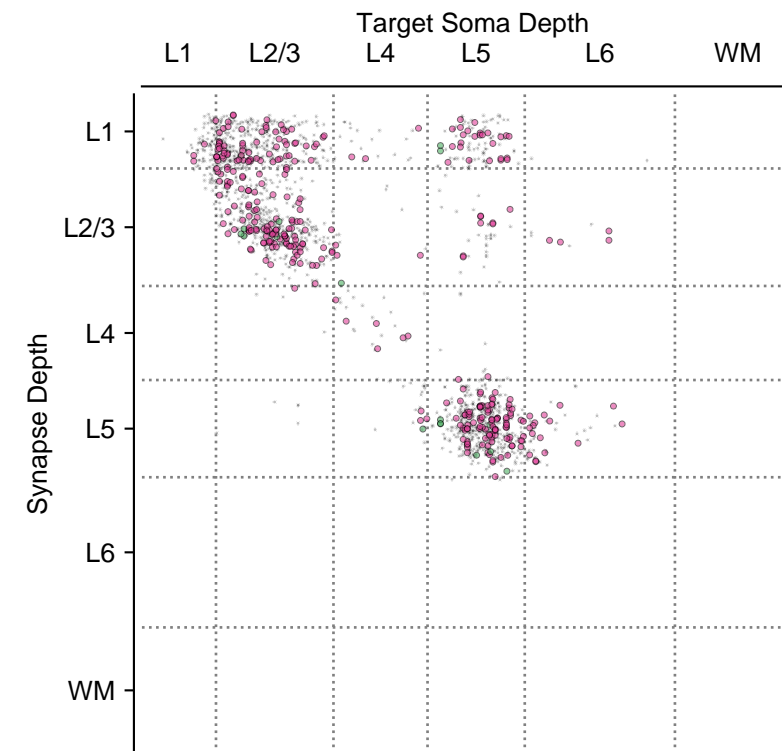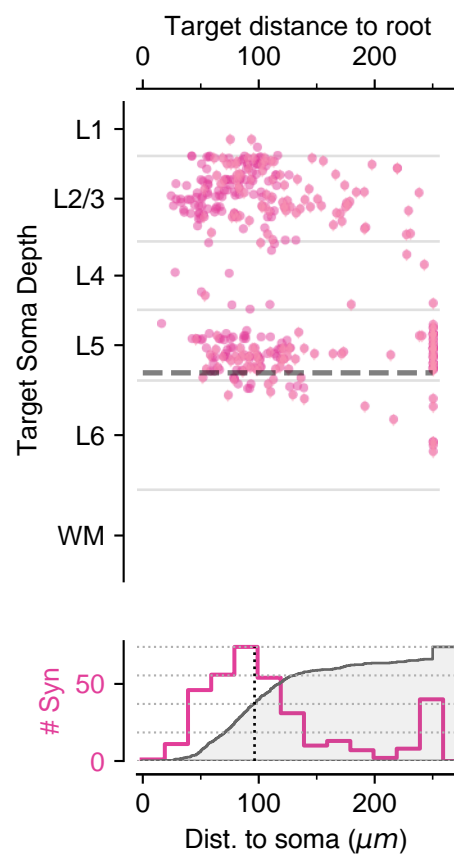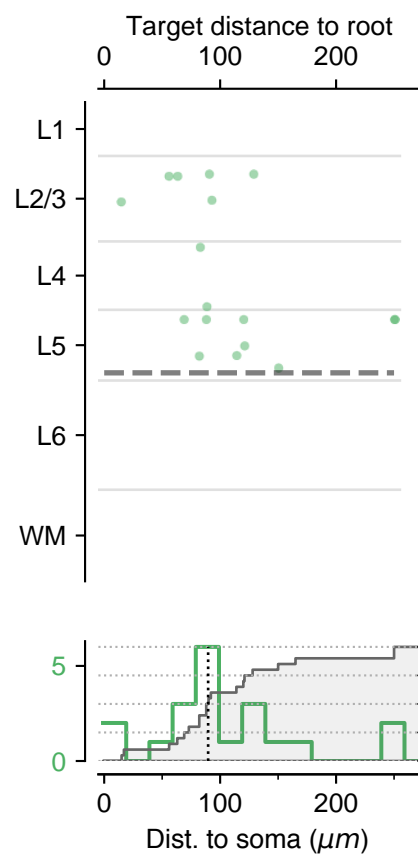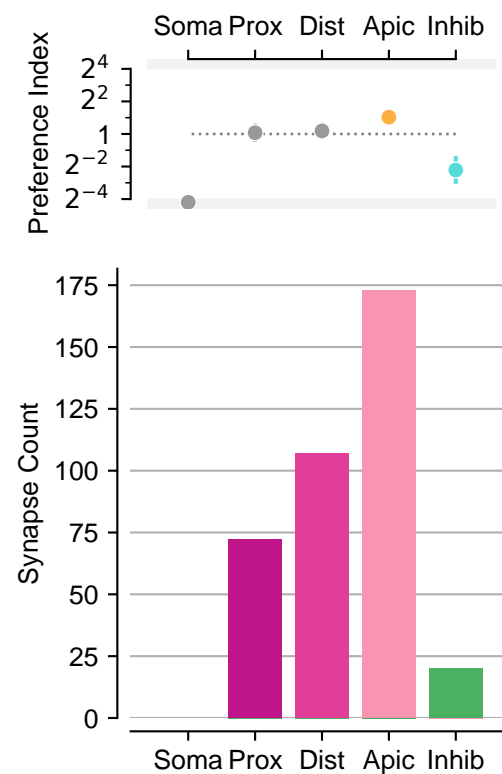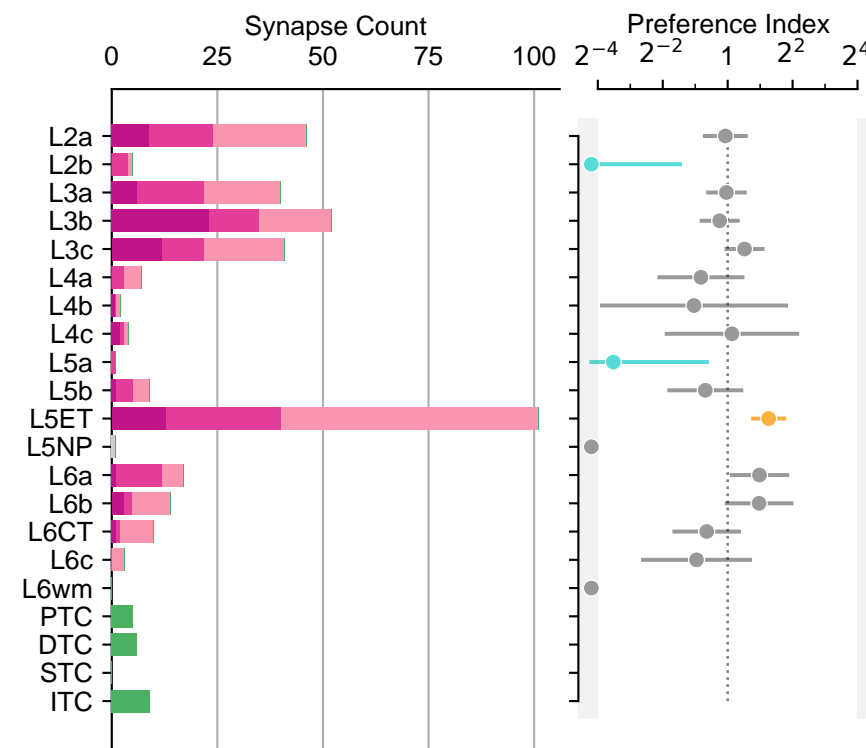



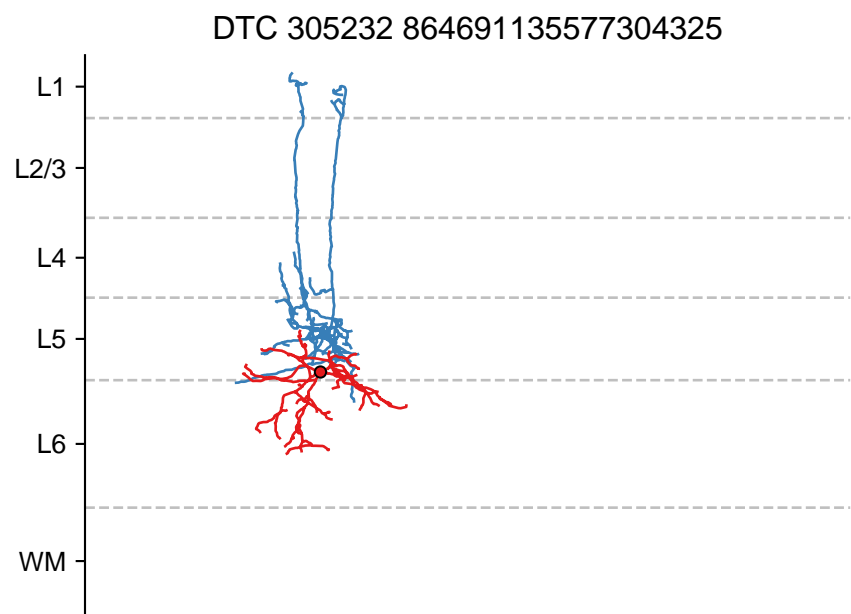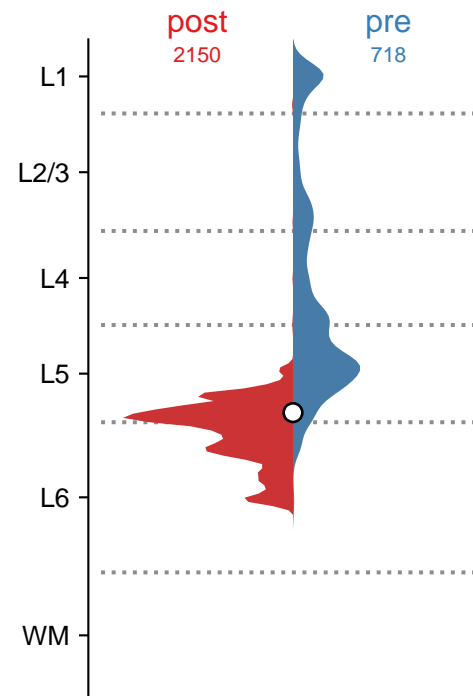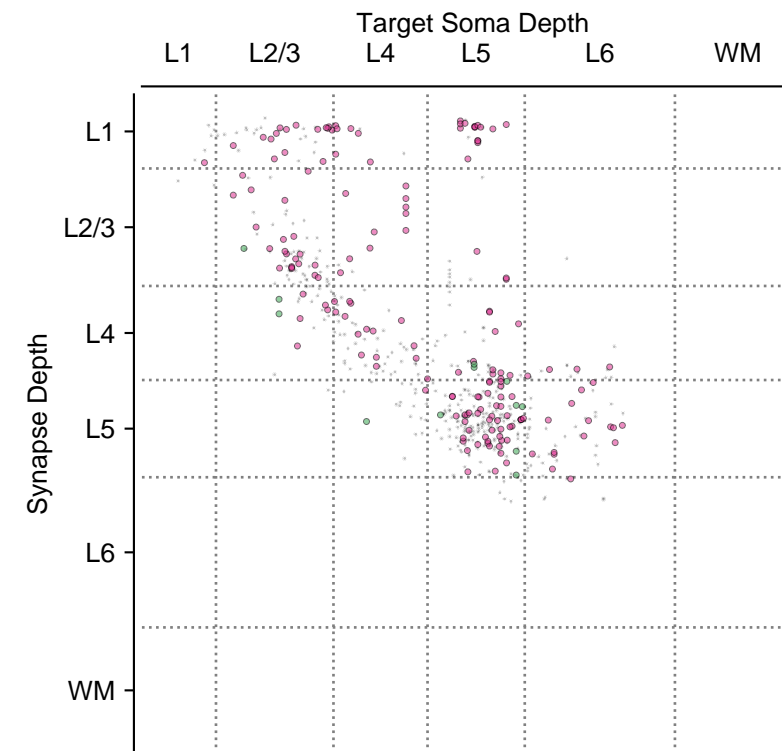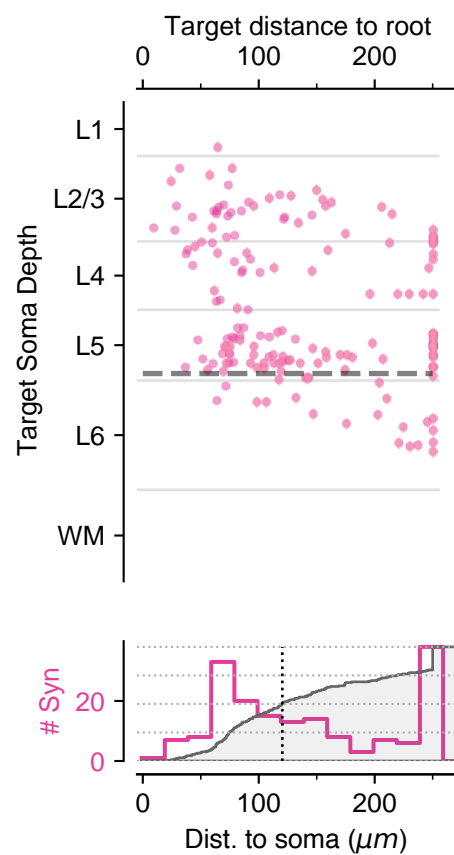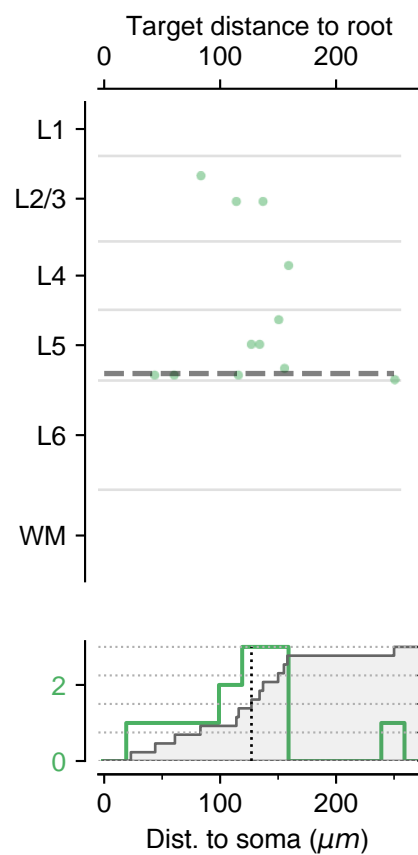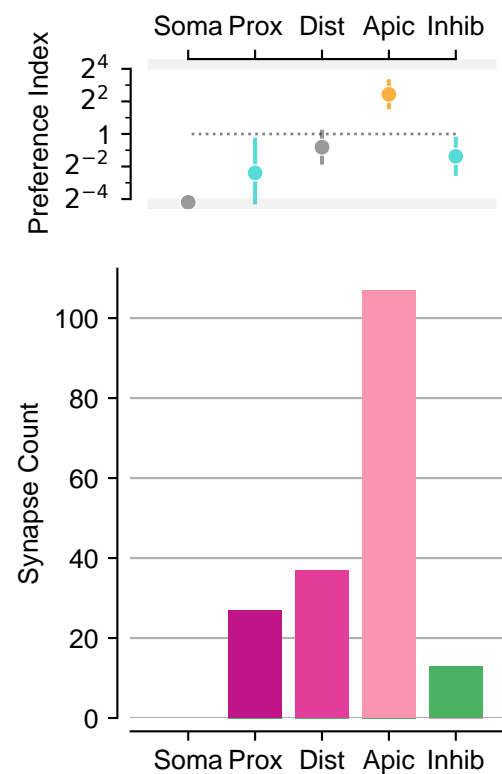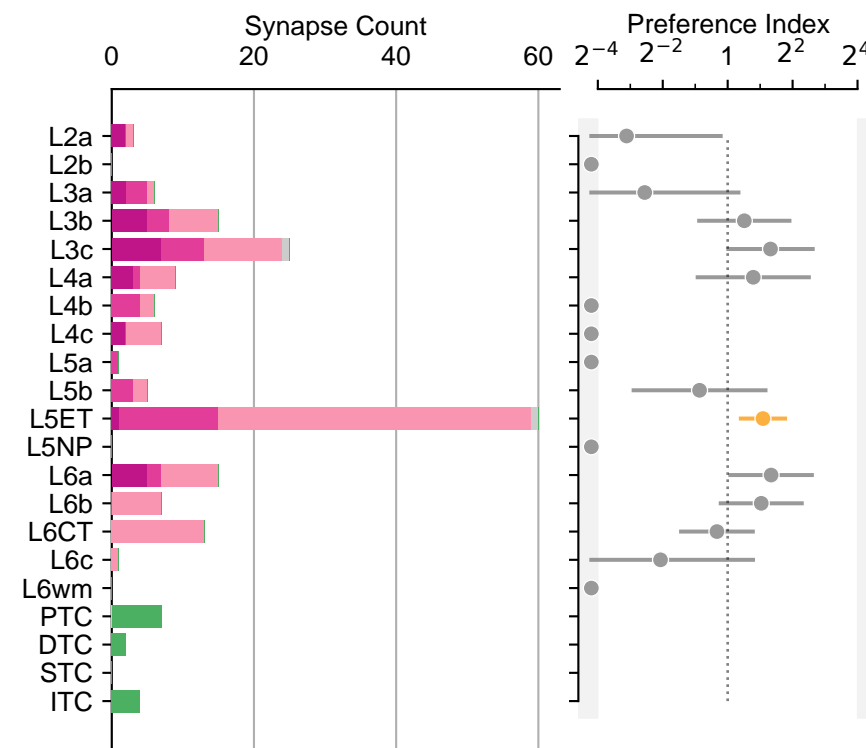

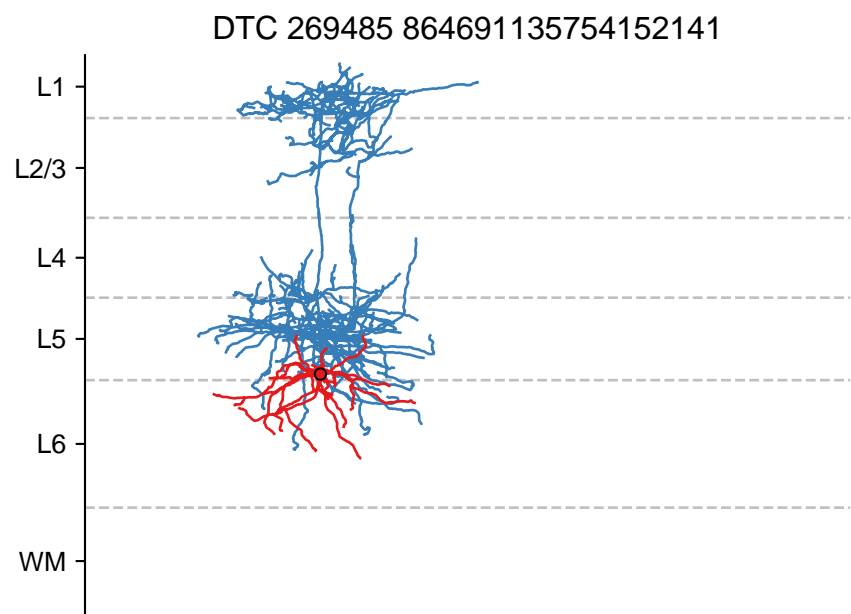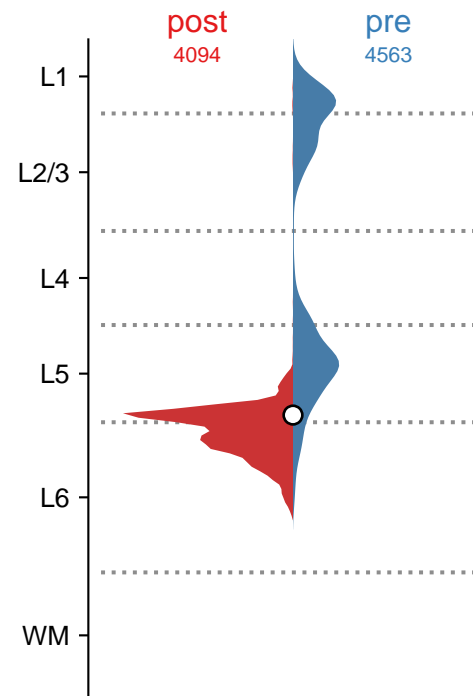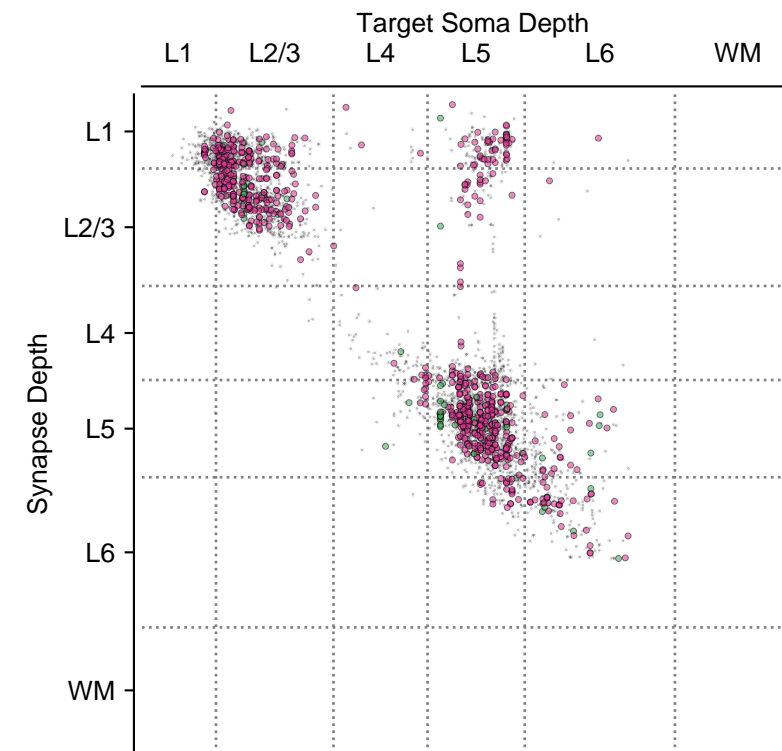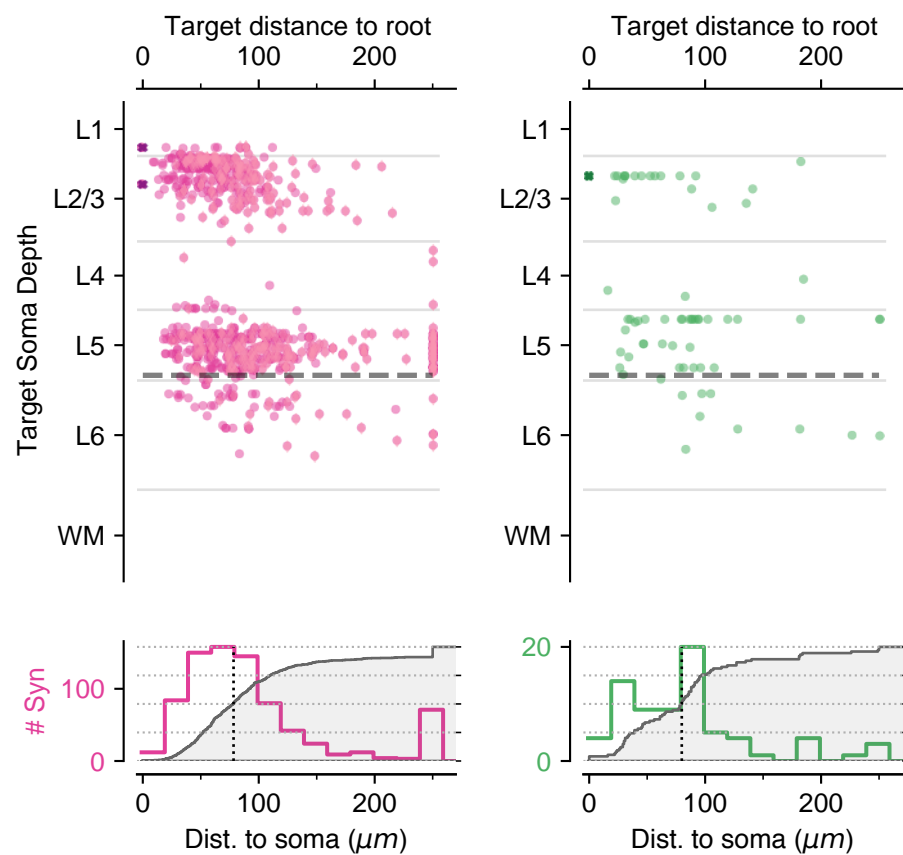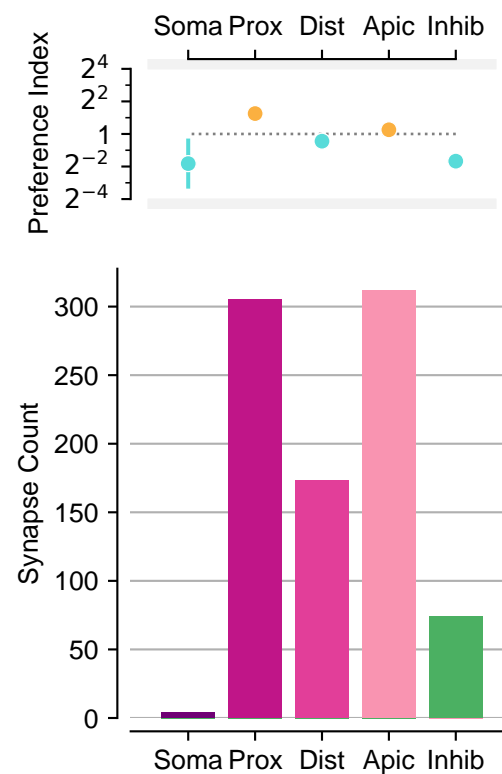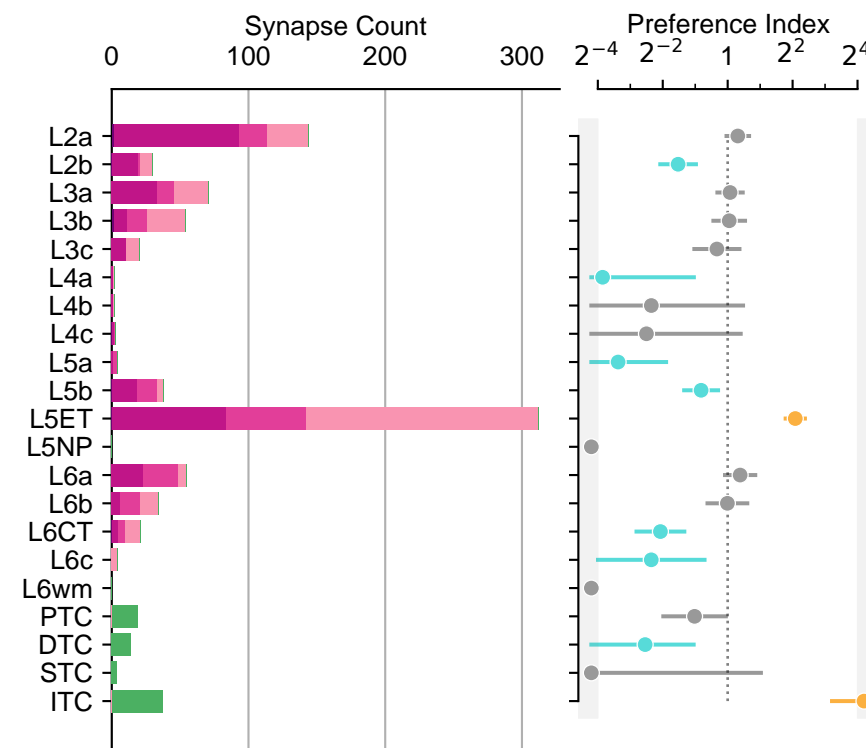

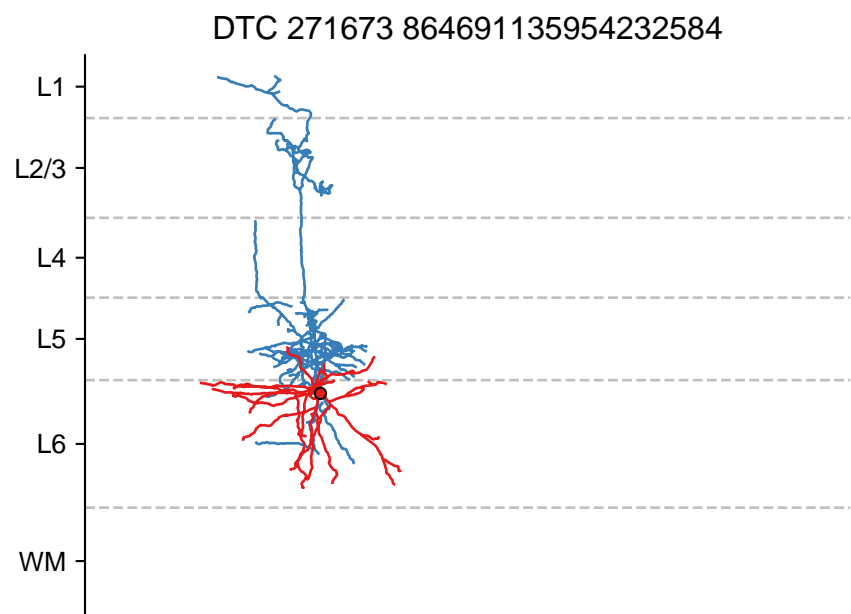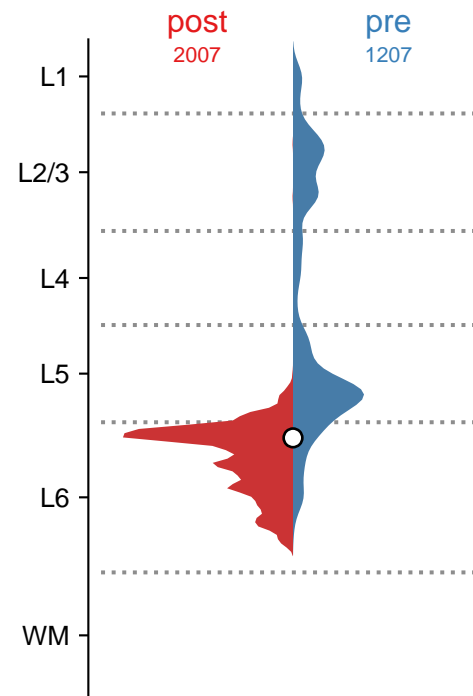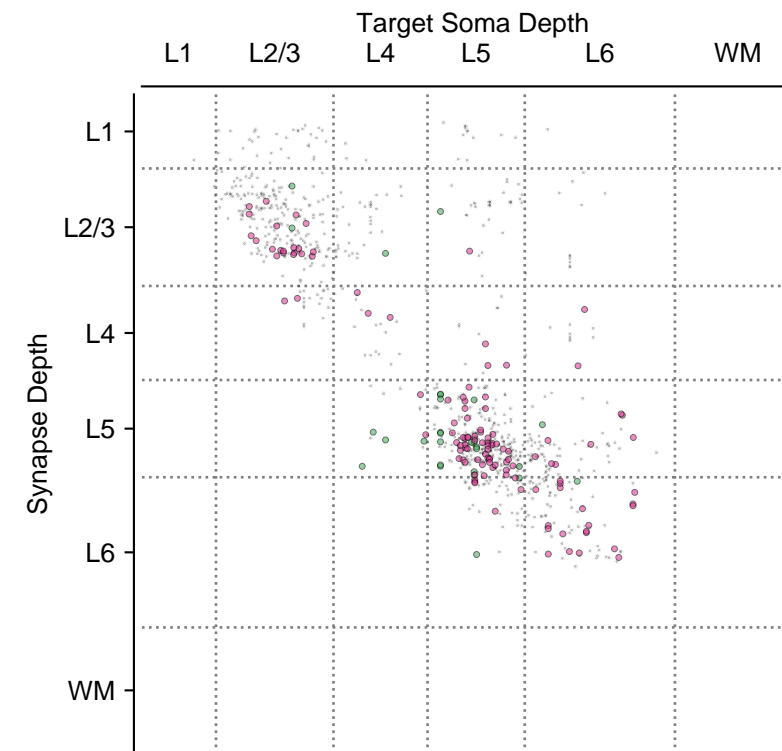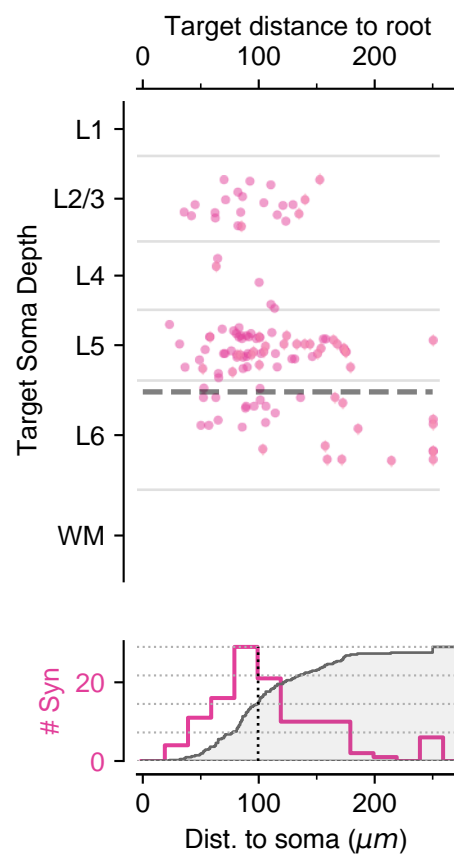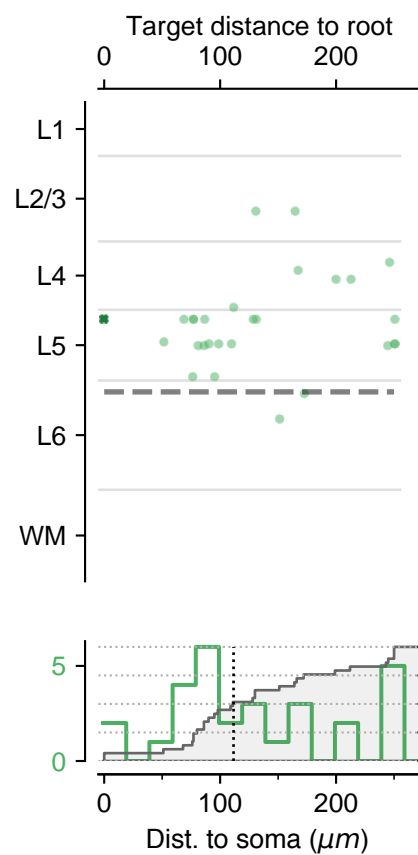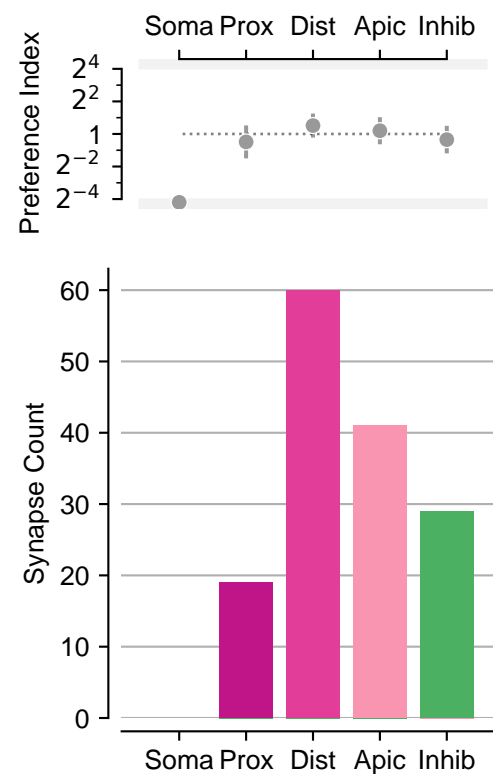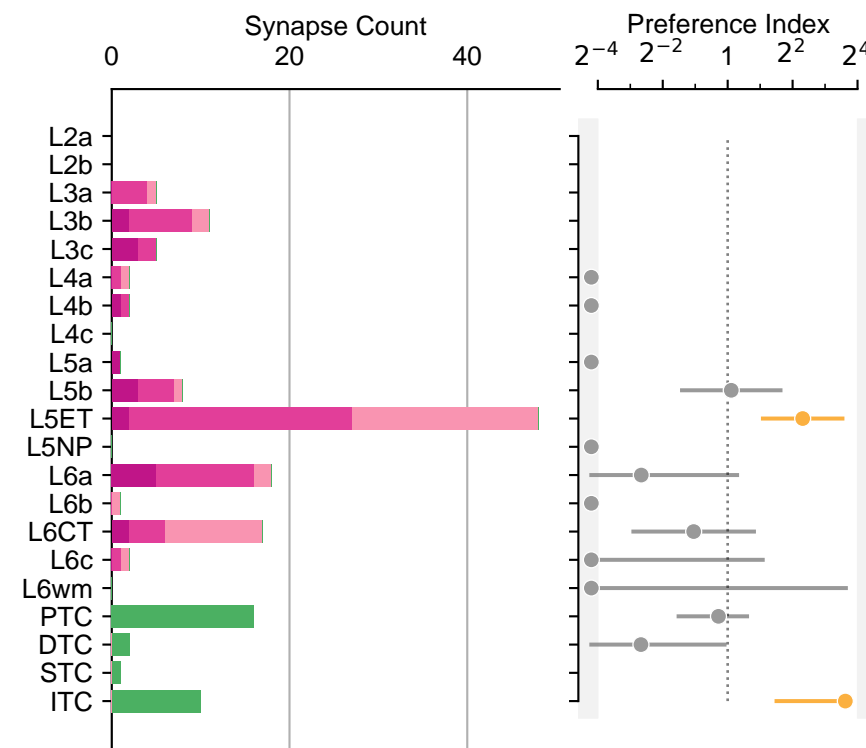

# Group 10

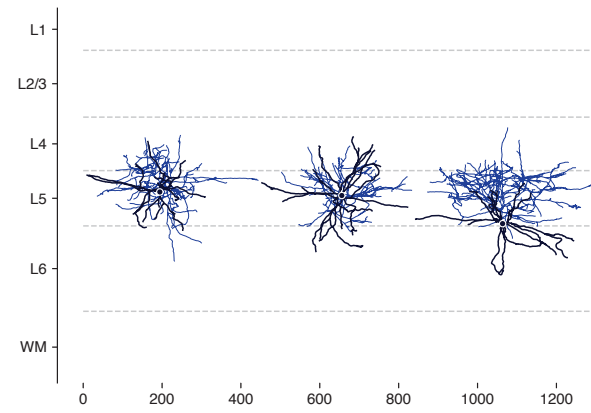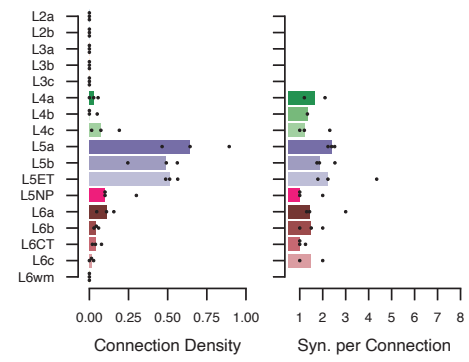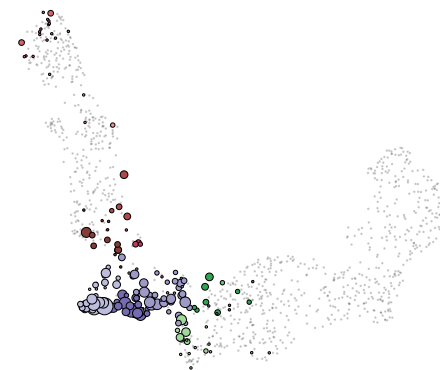

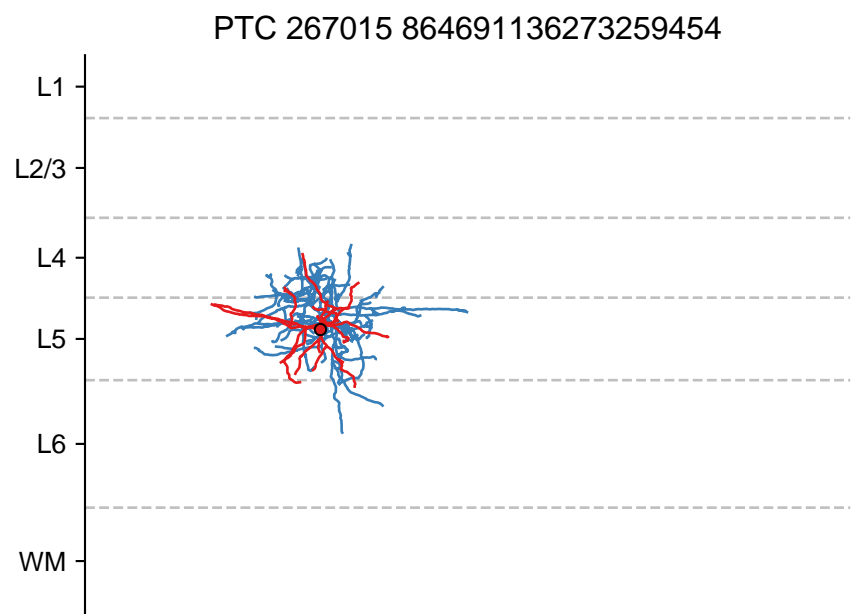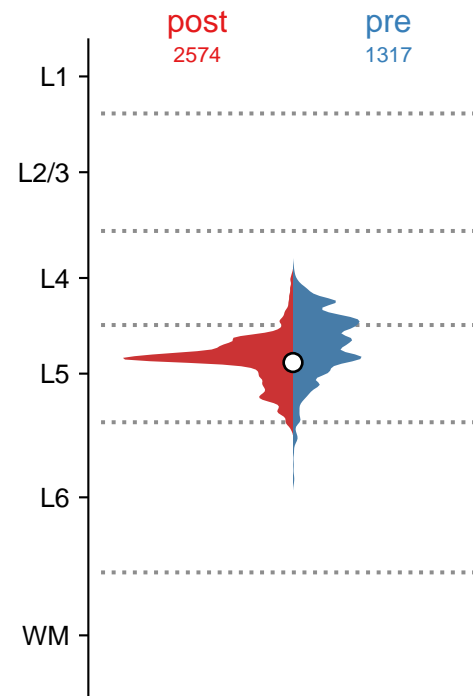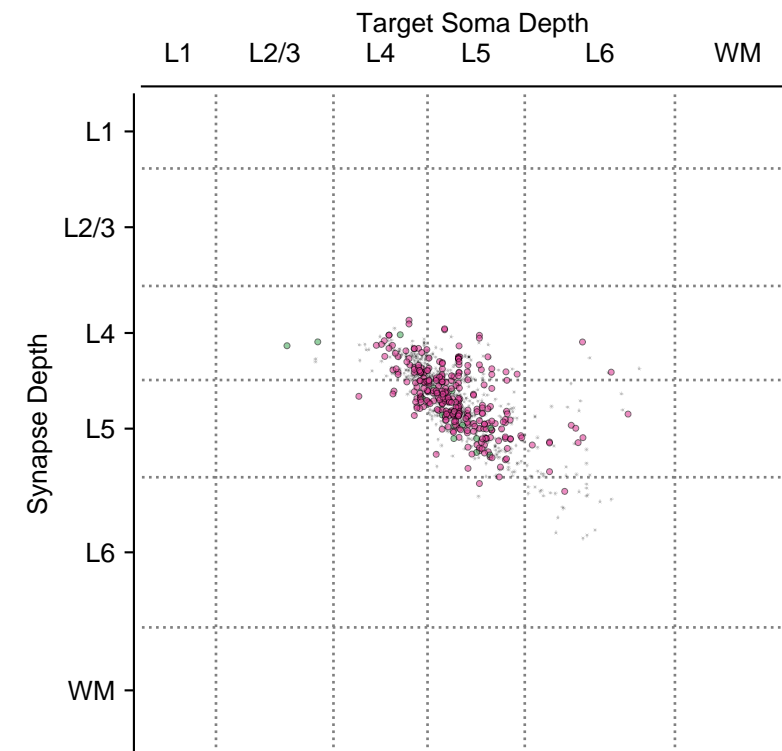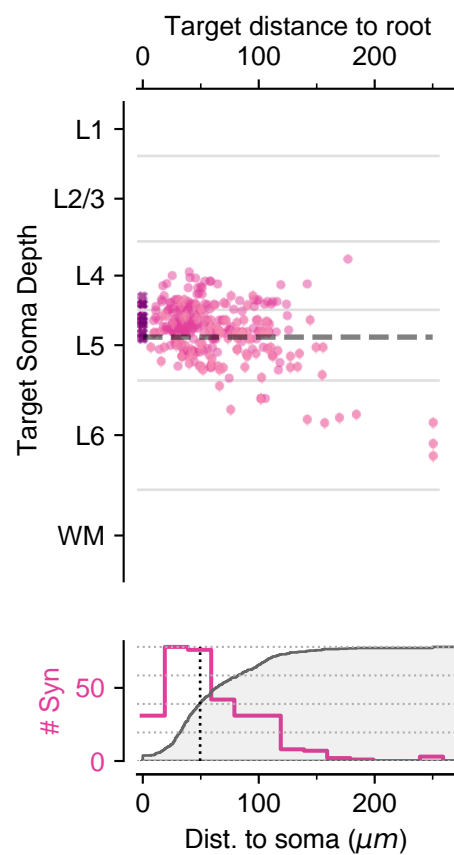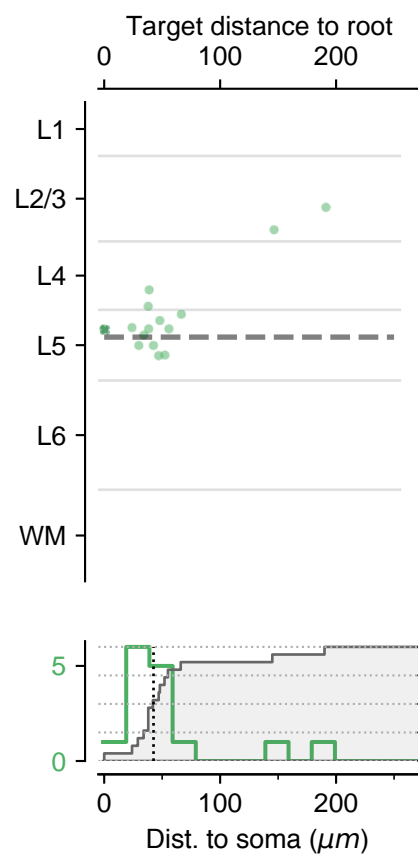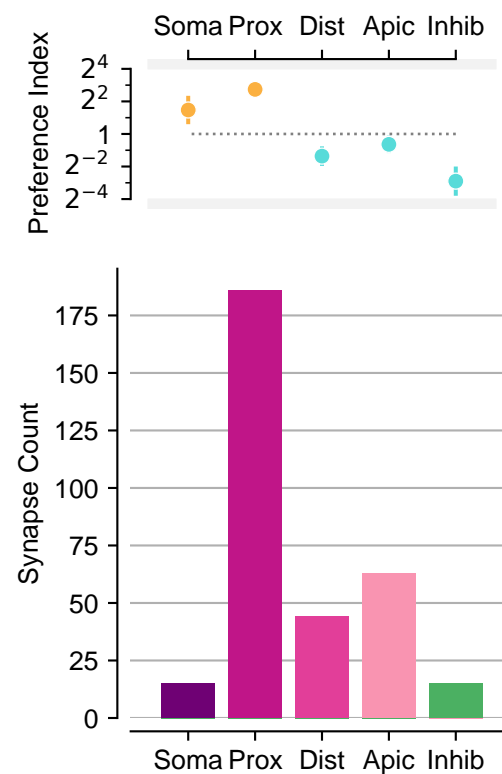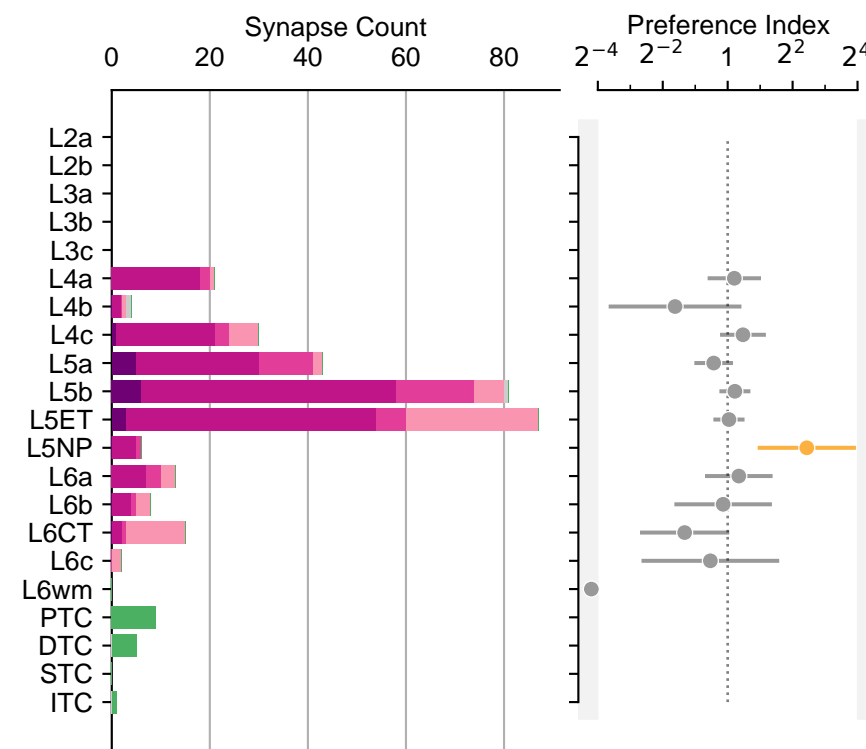

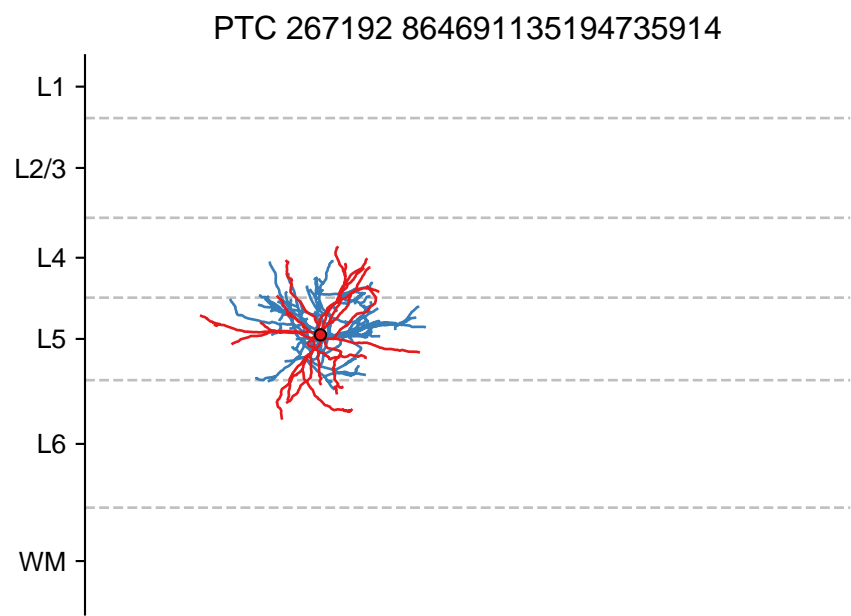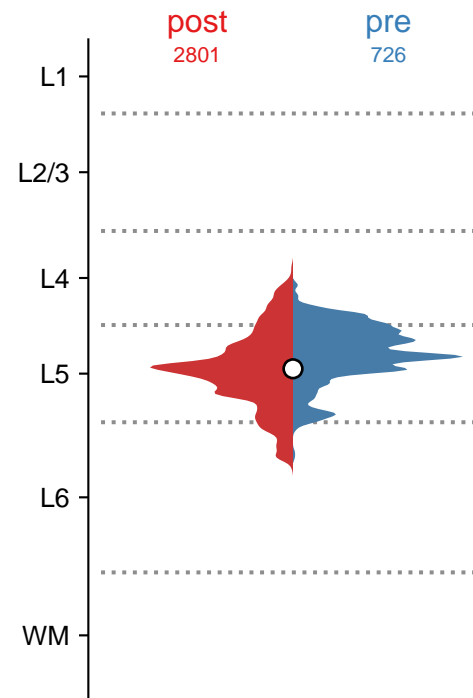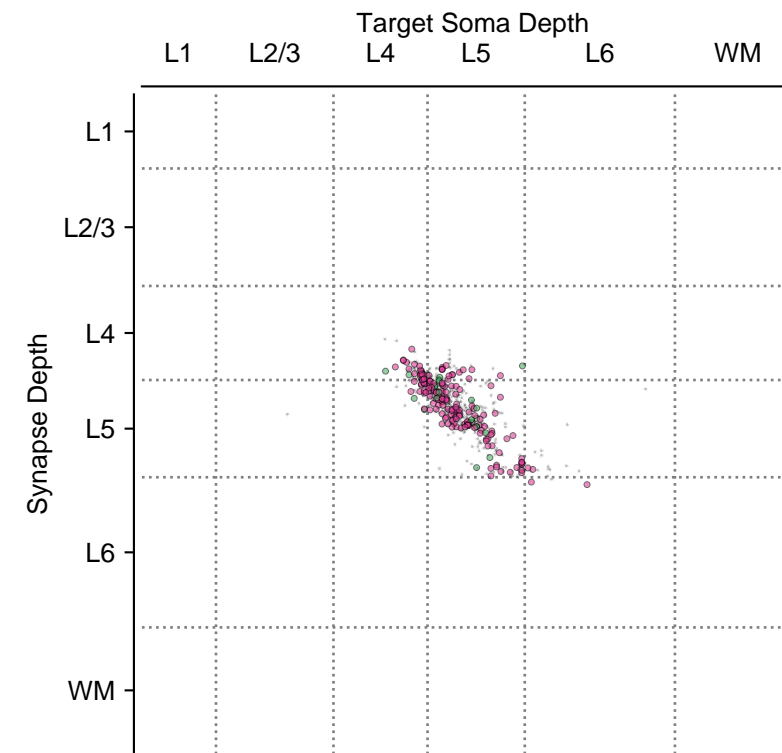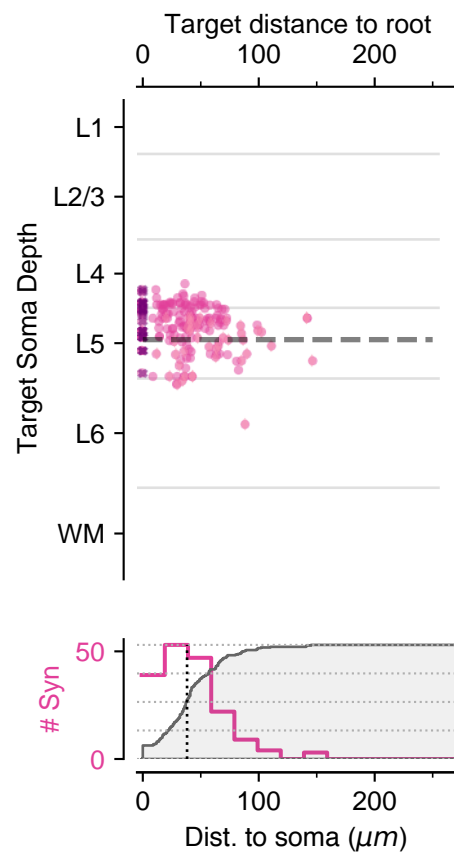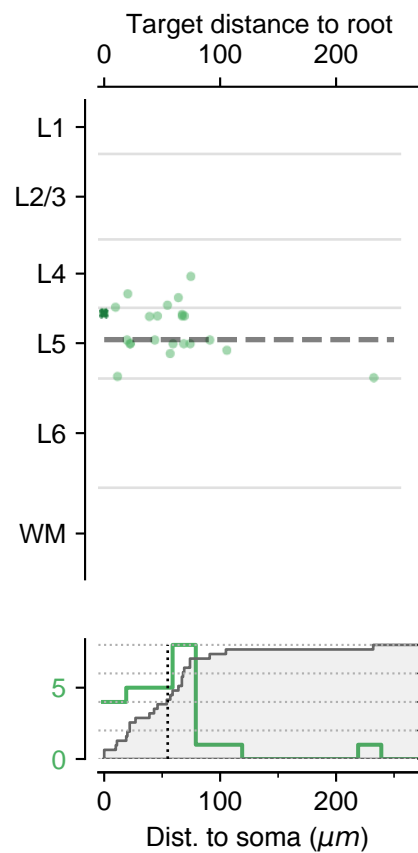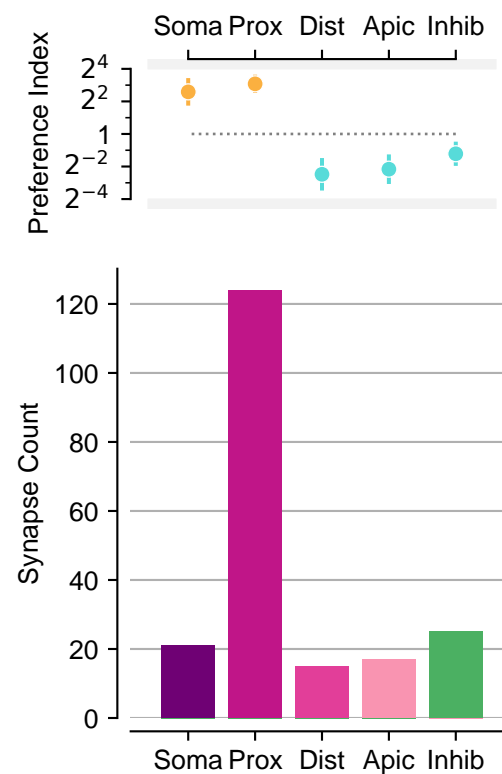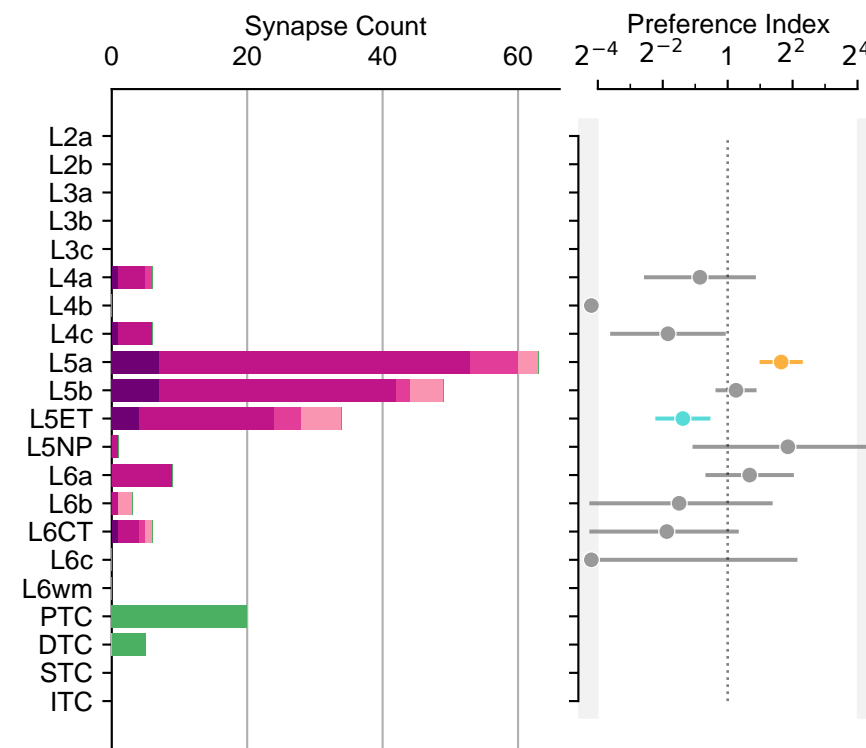

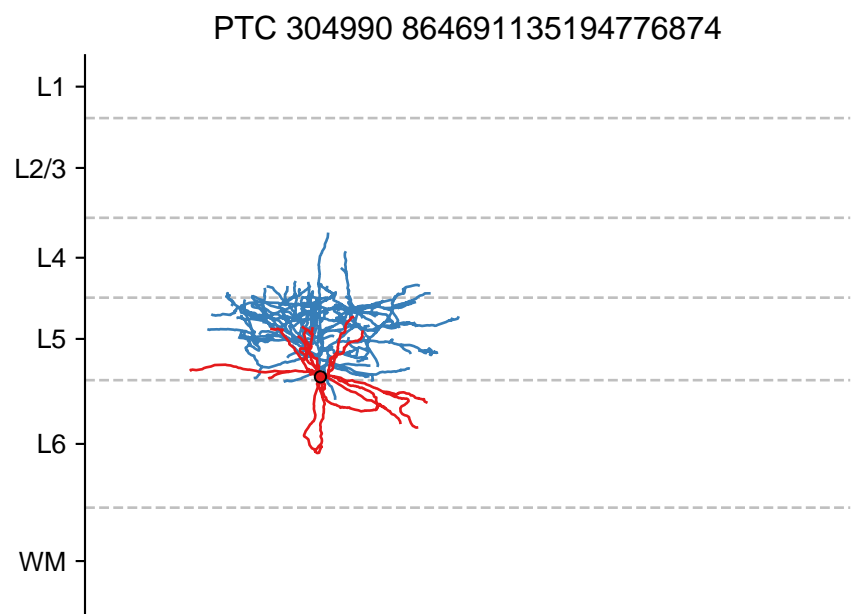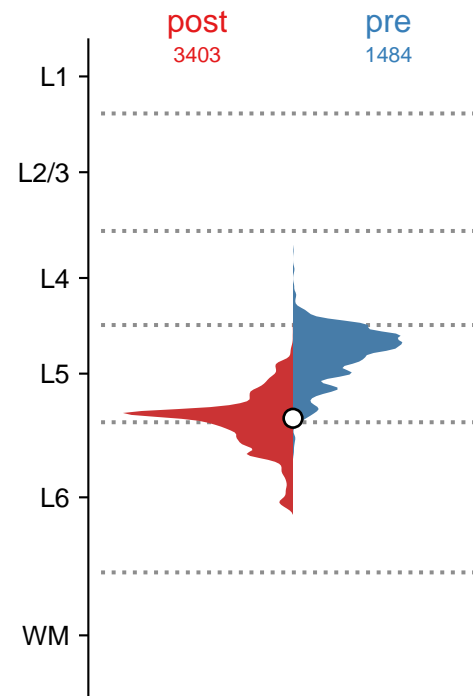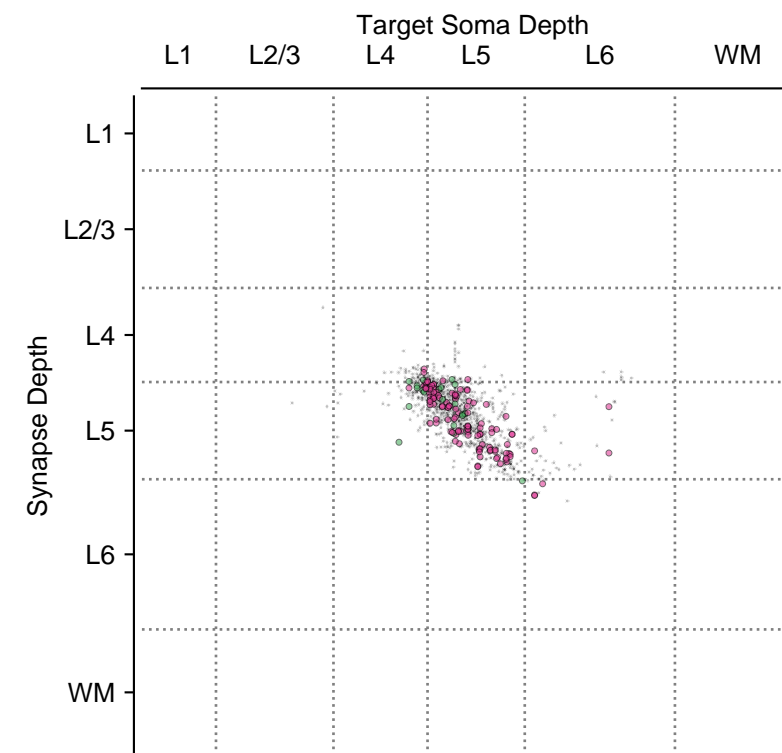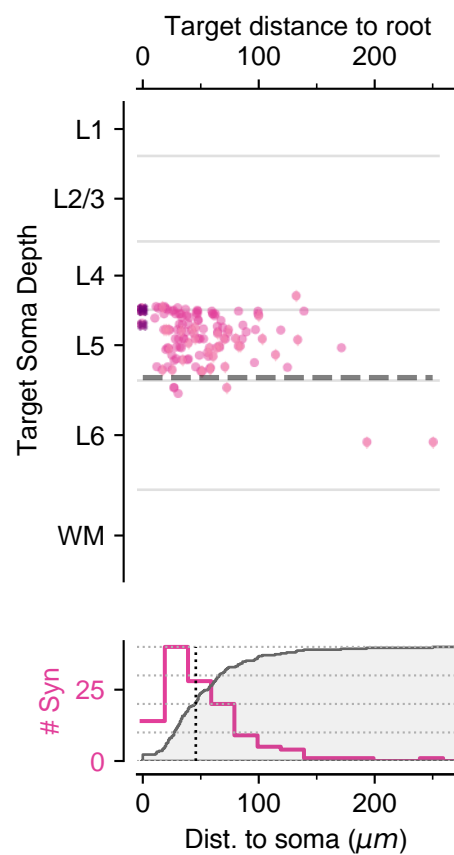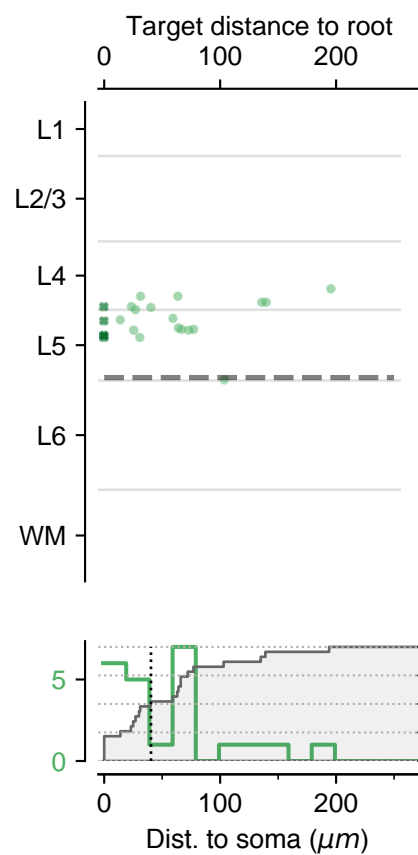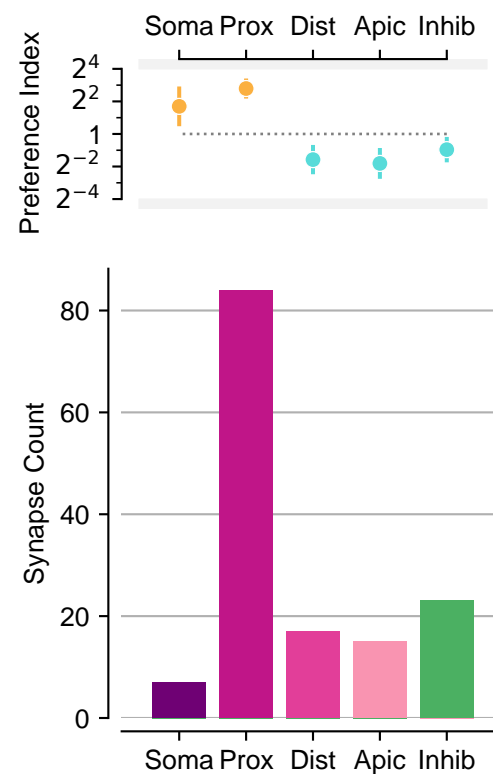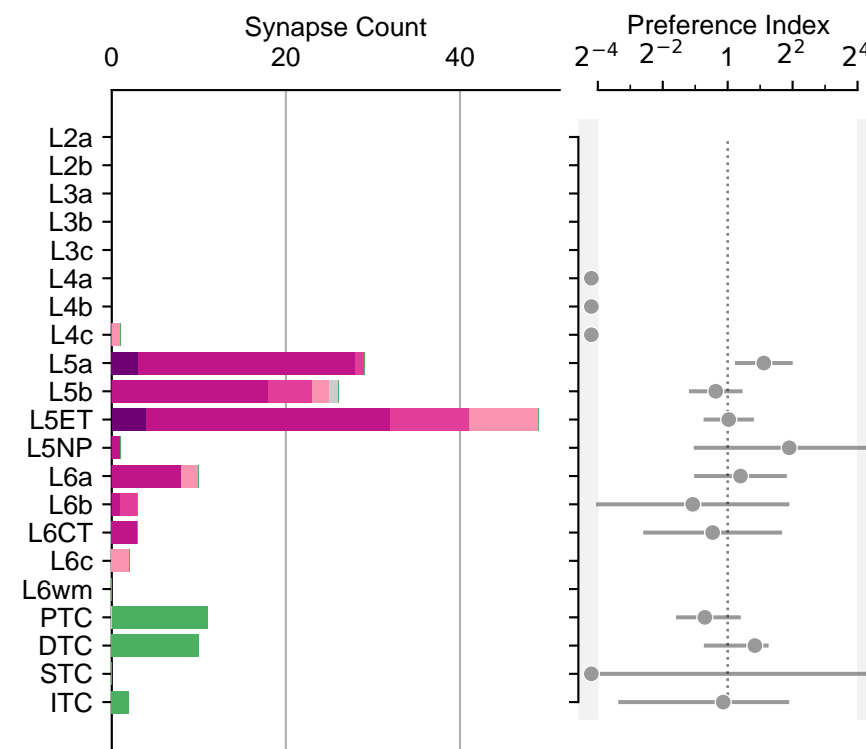

# Group 11

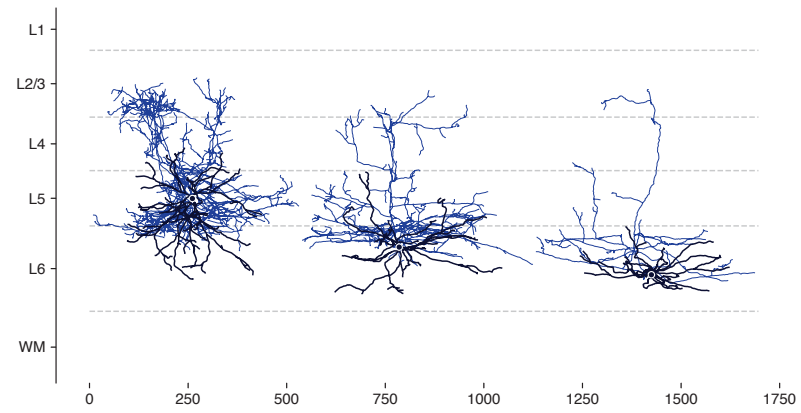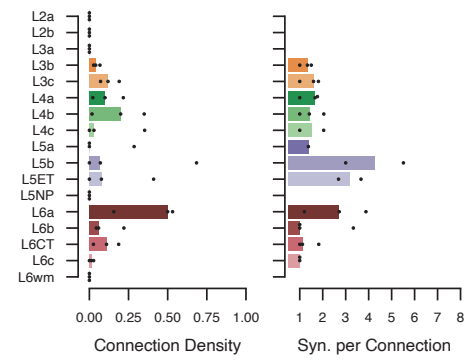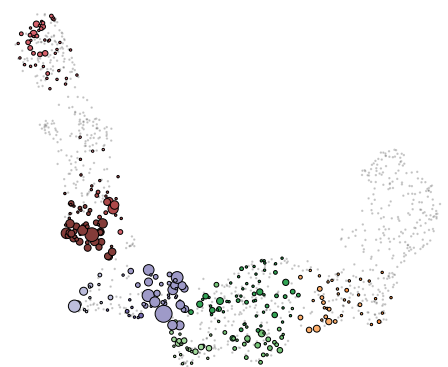



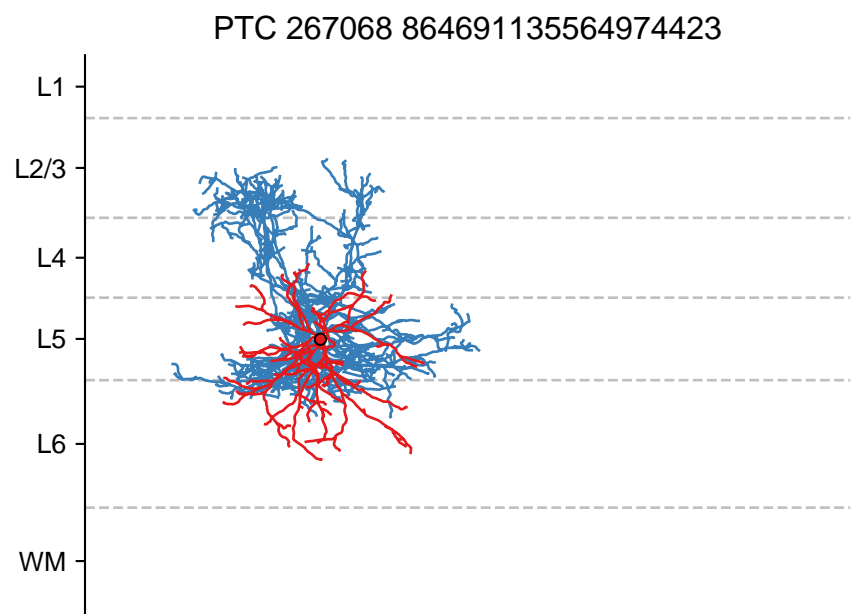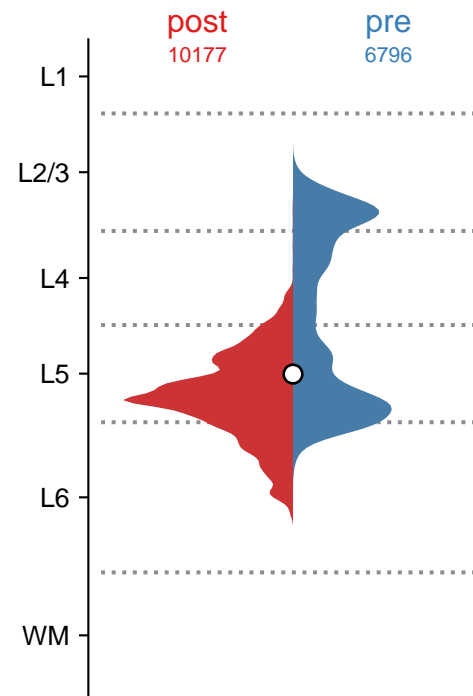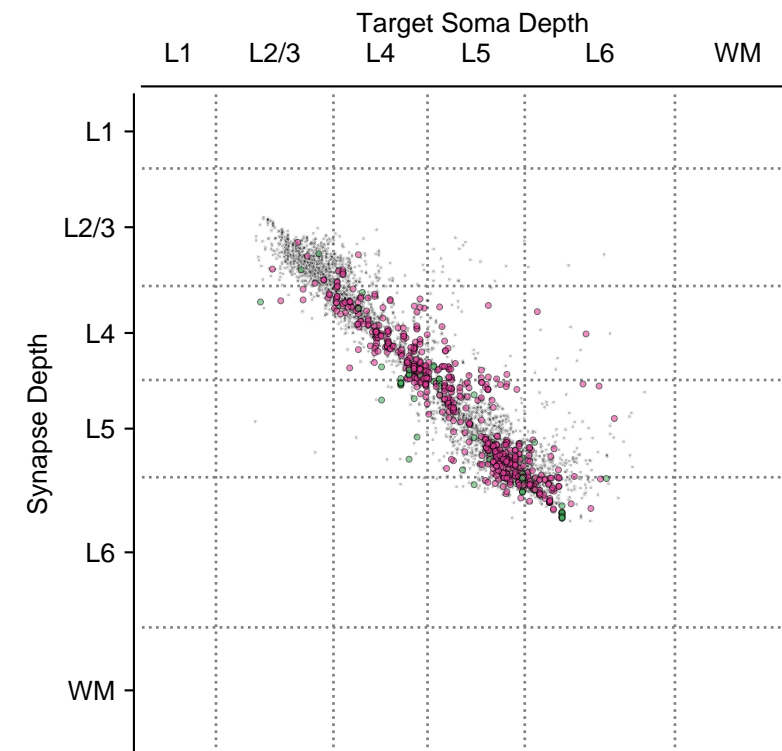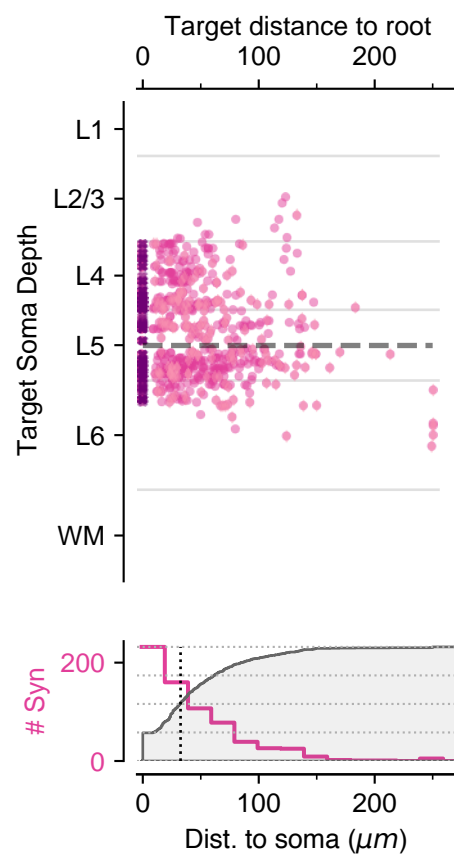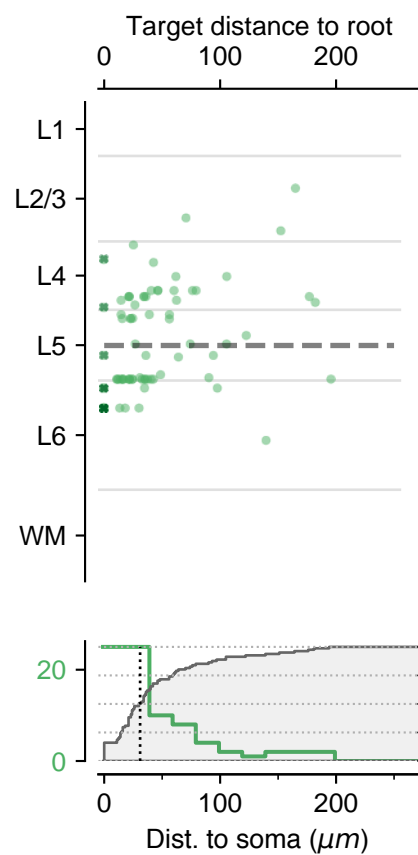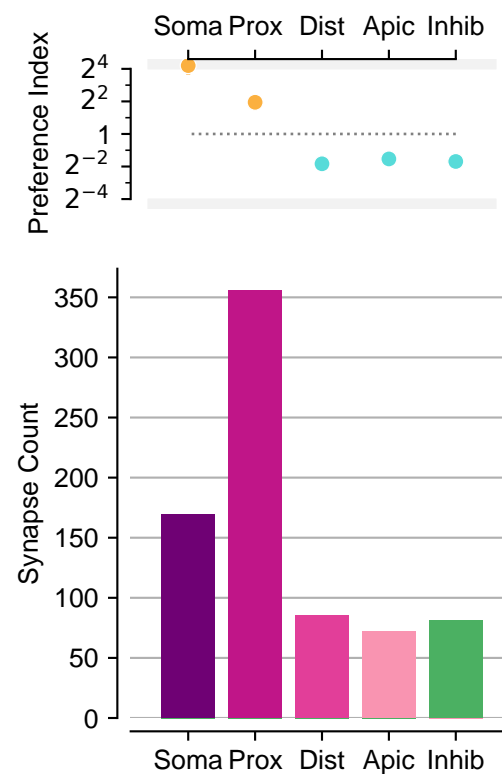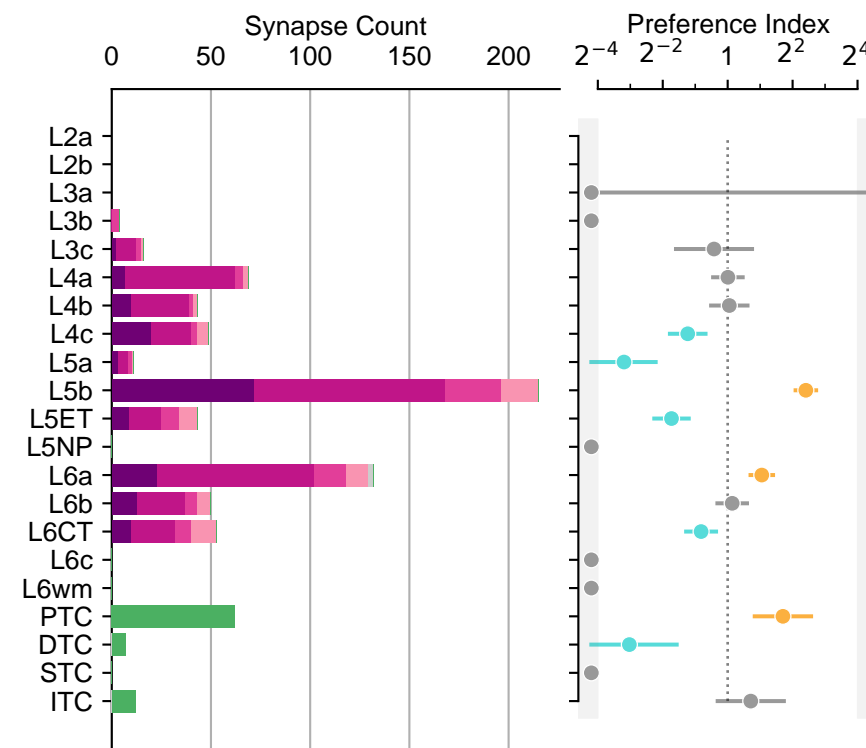

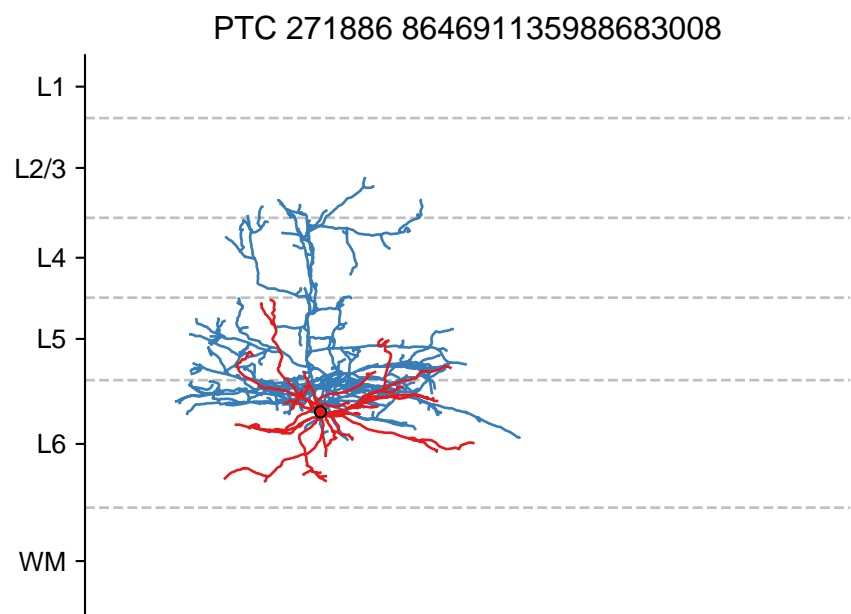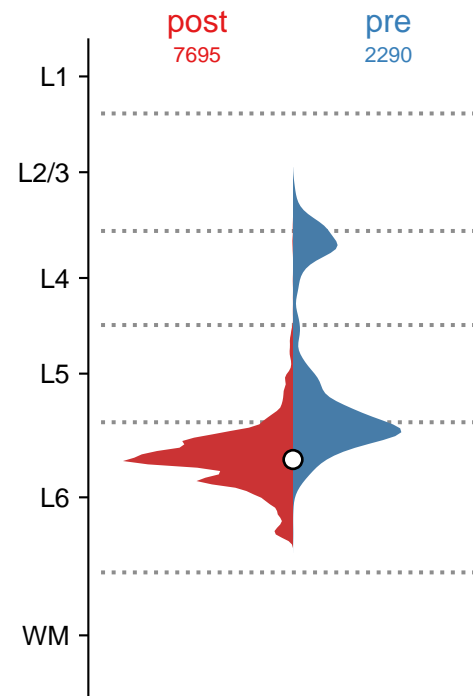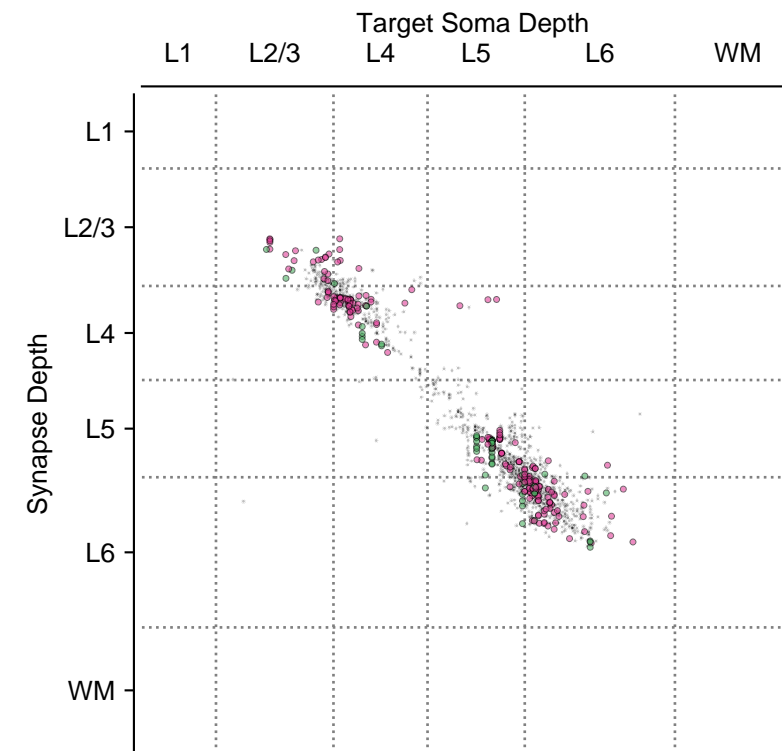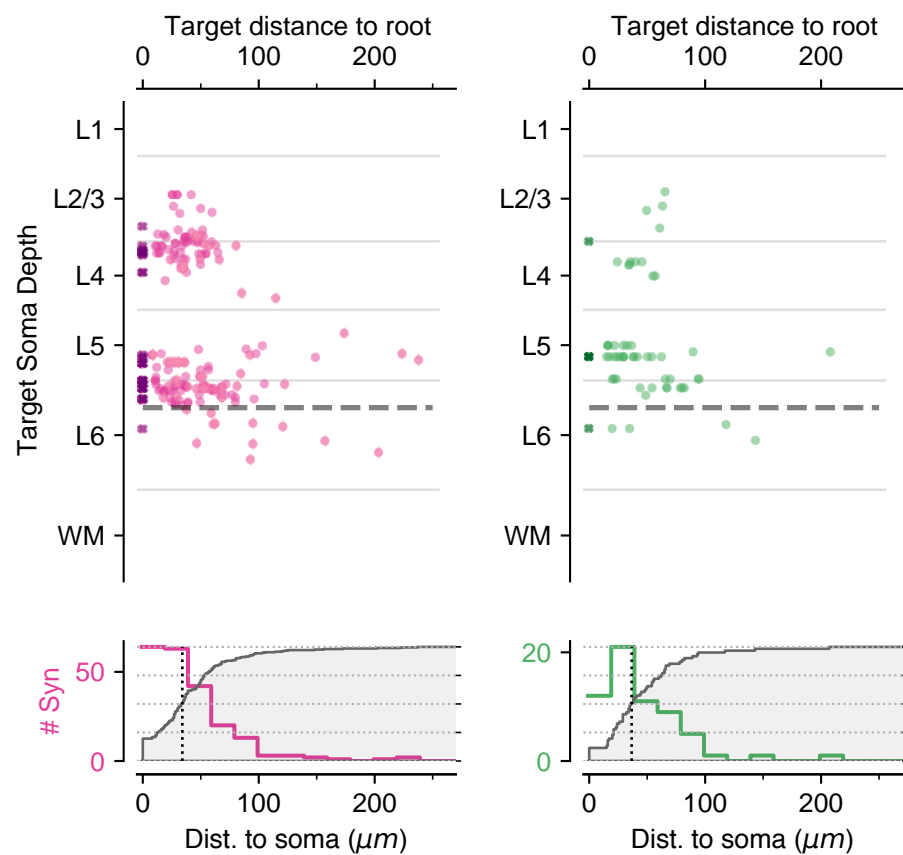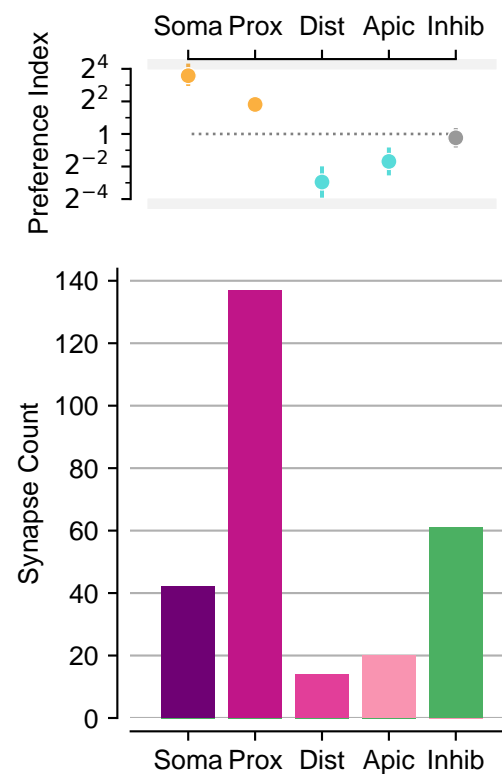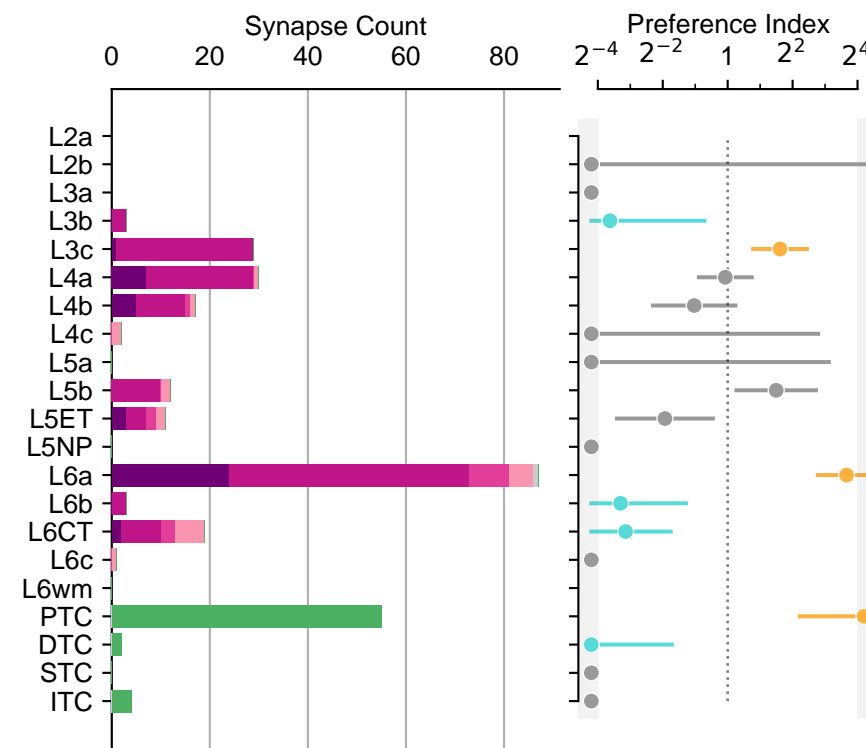

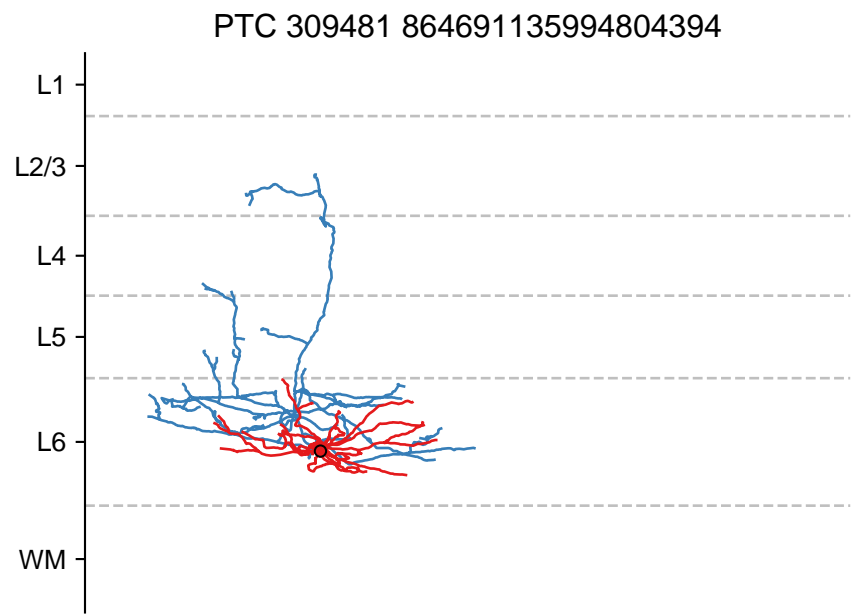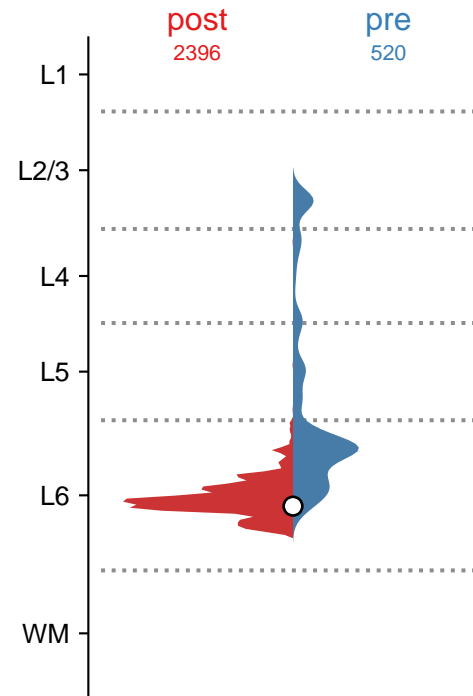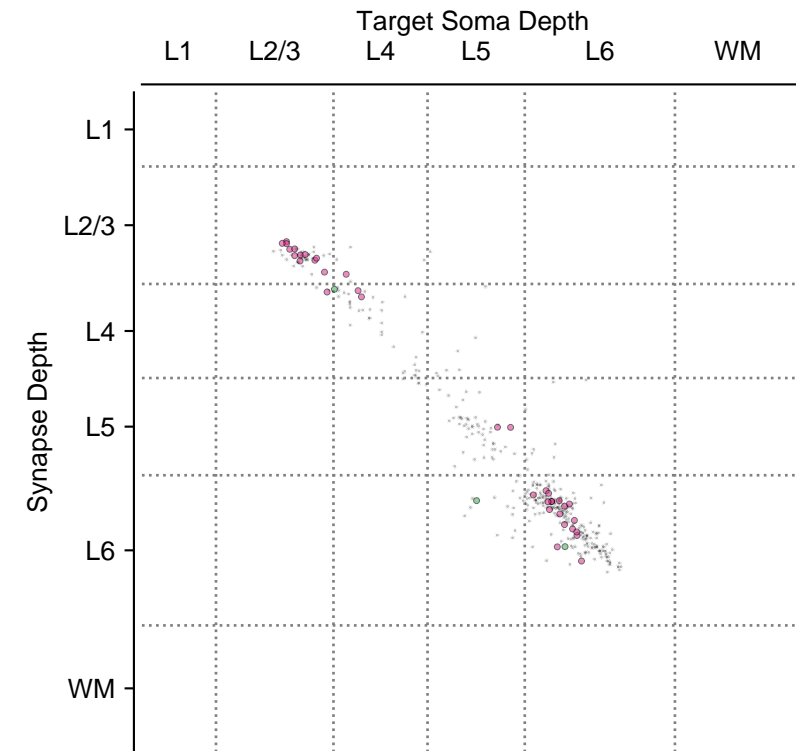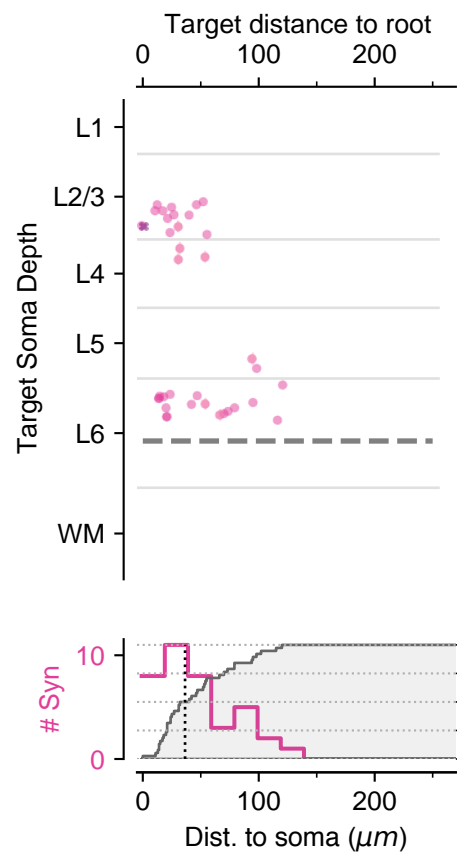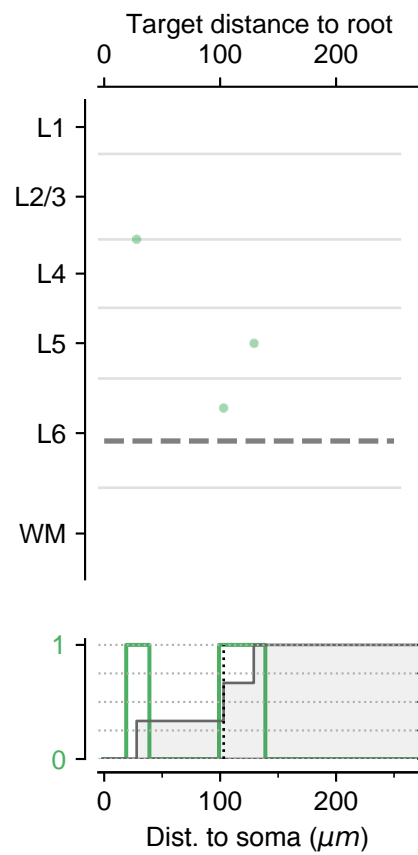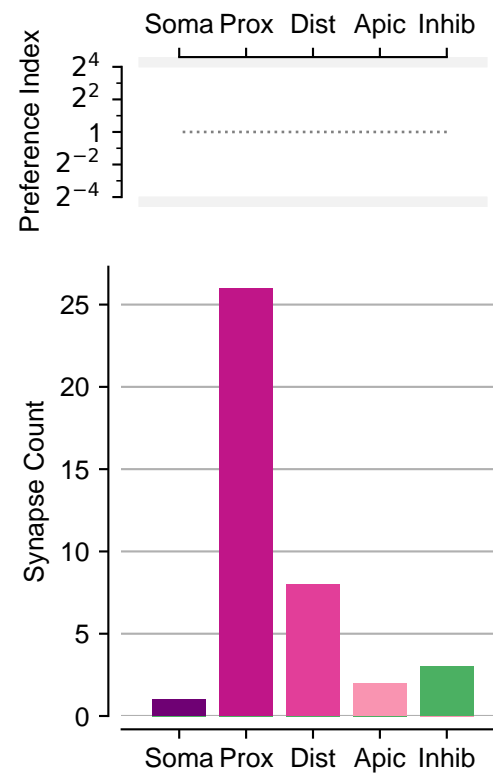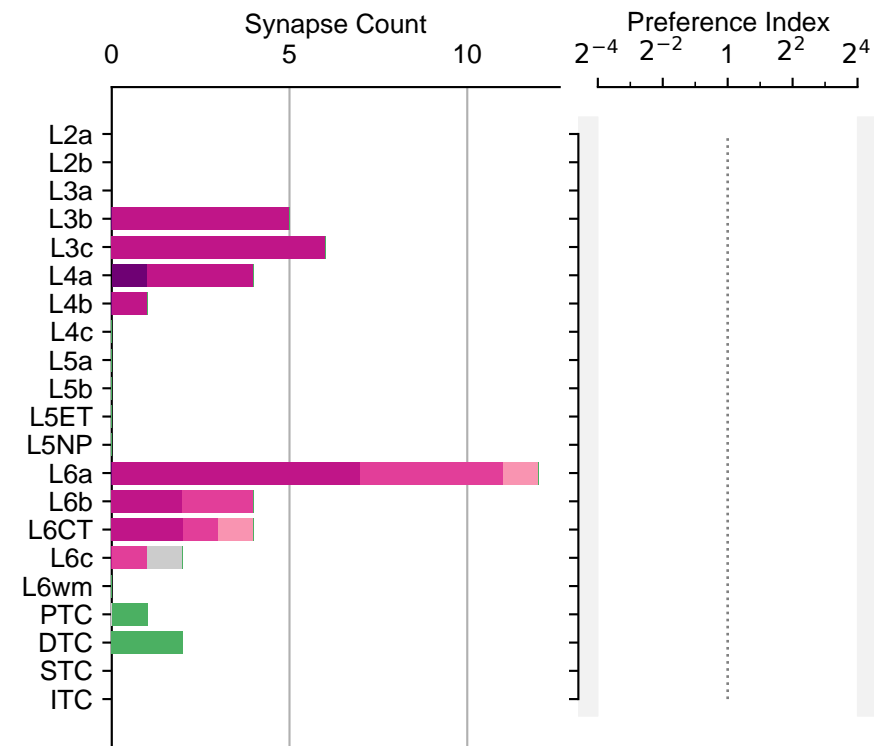

# Group 12

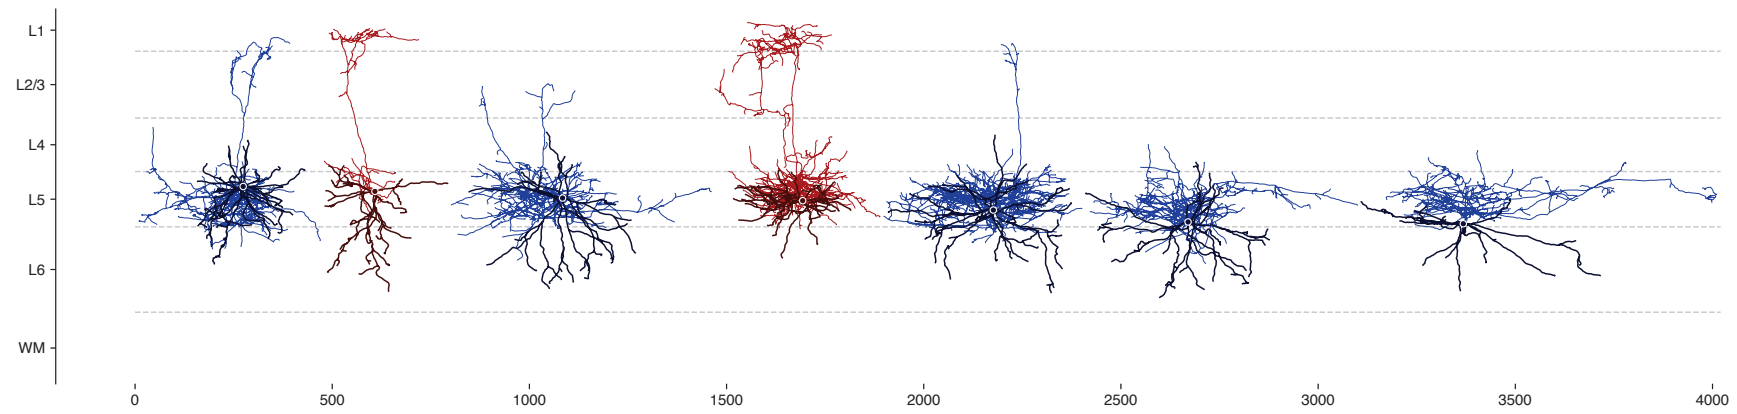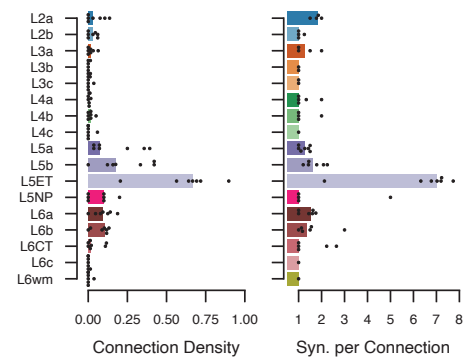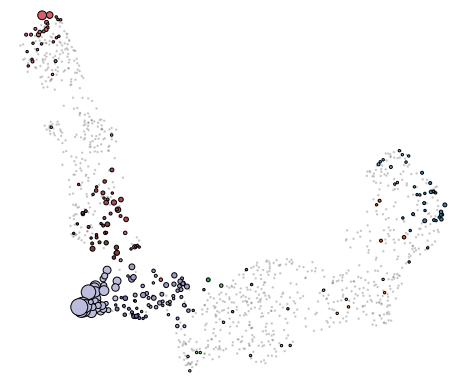

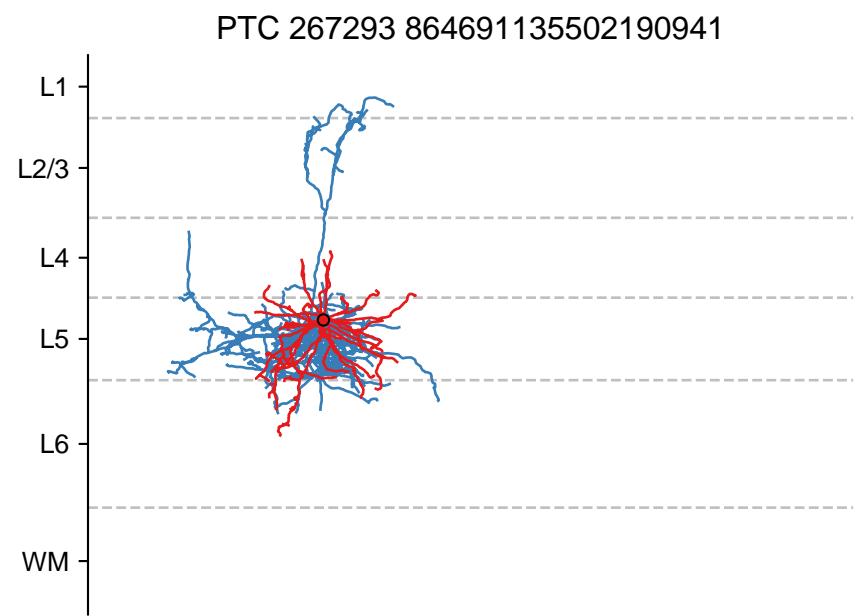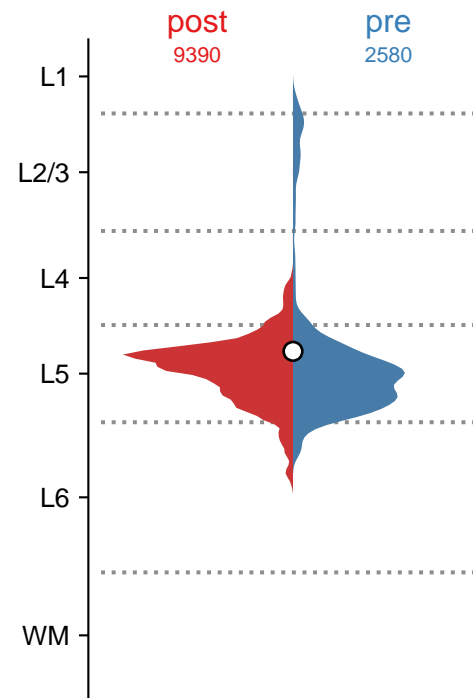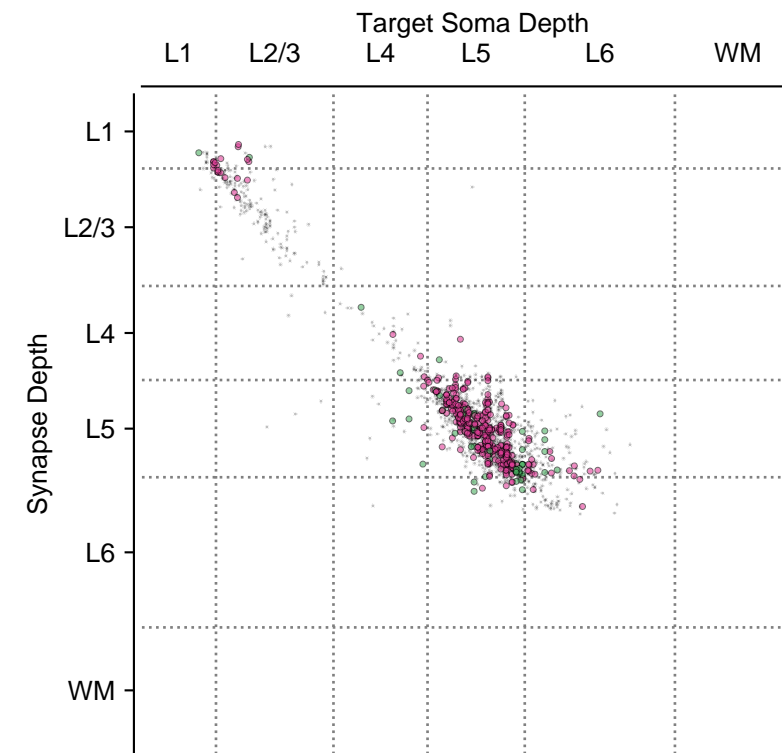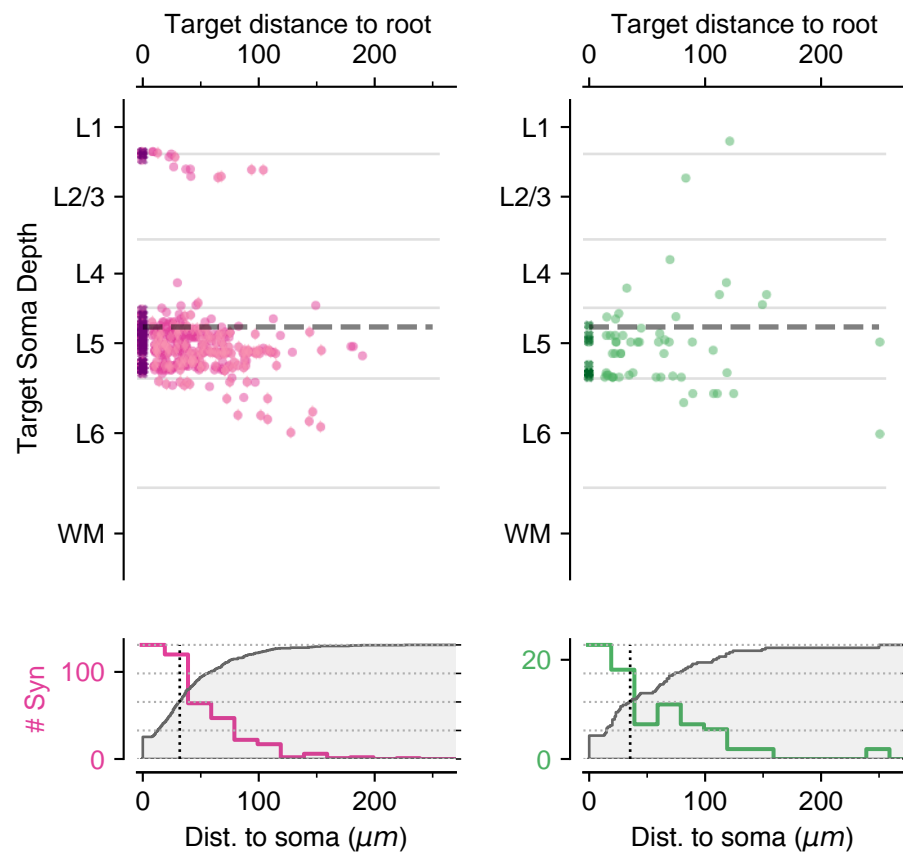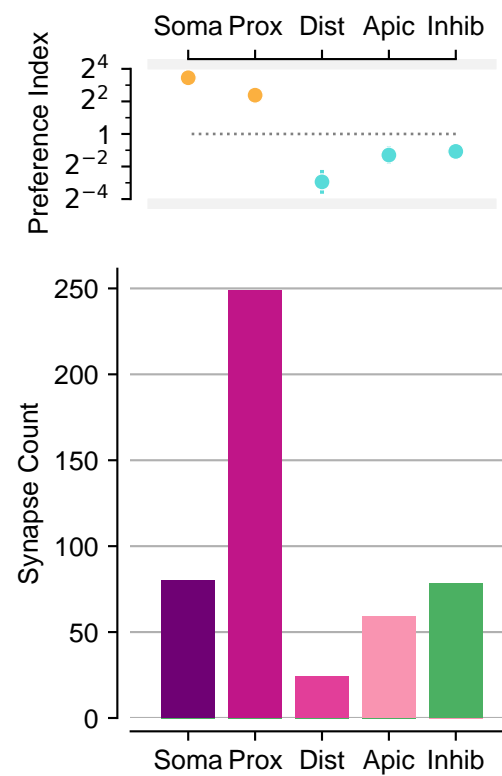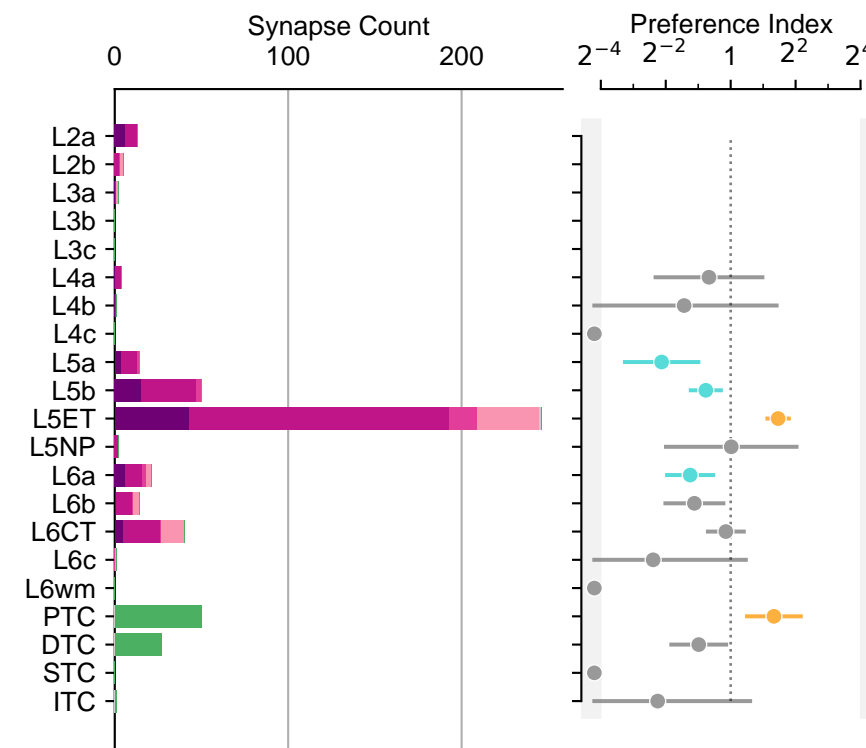

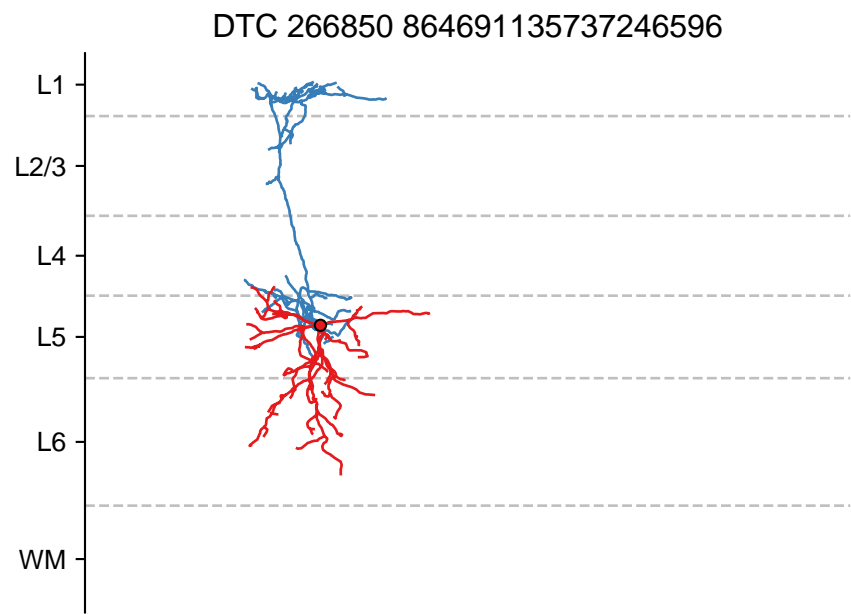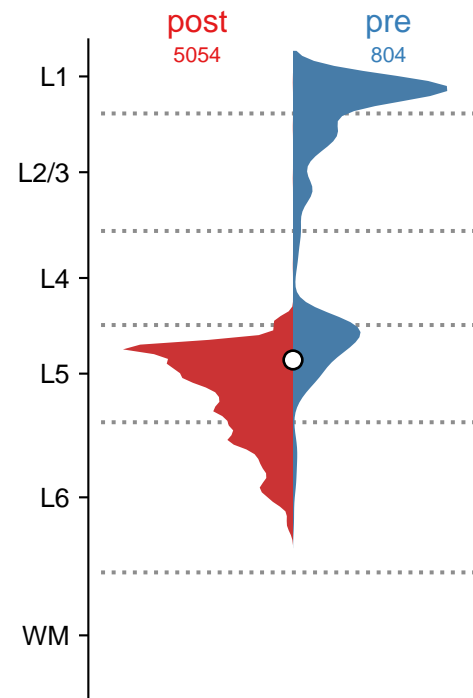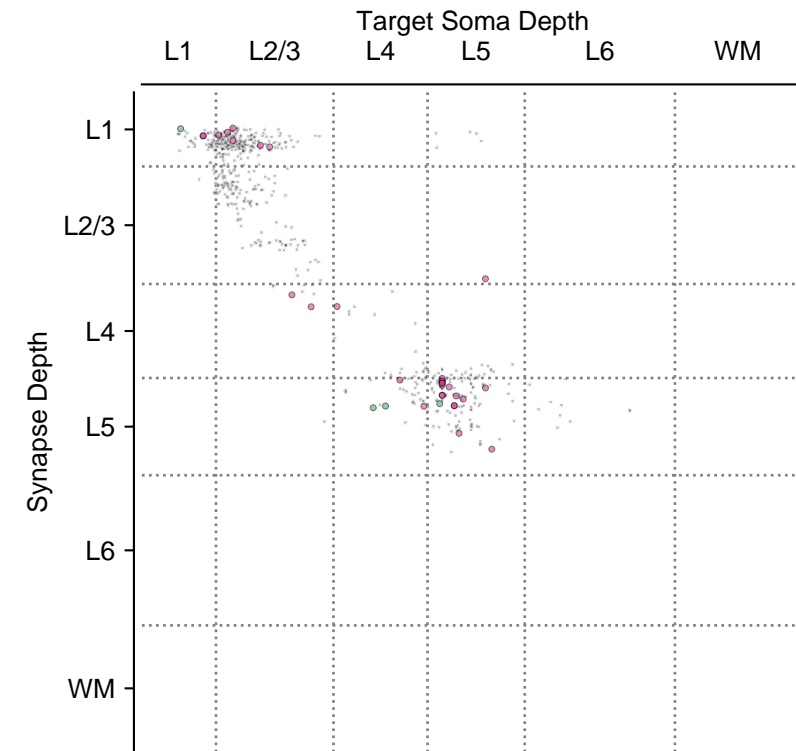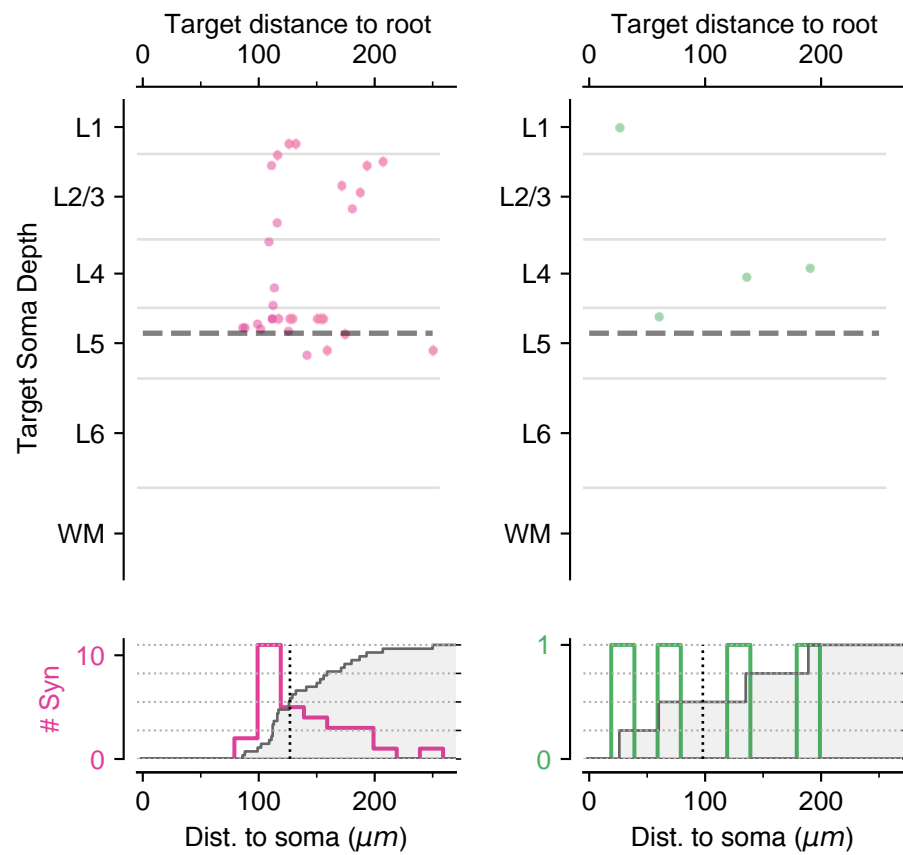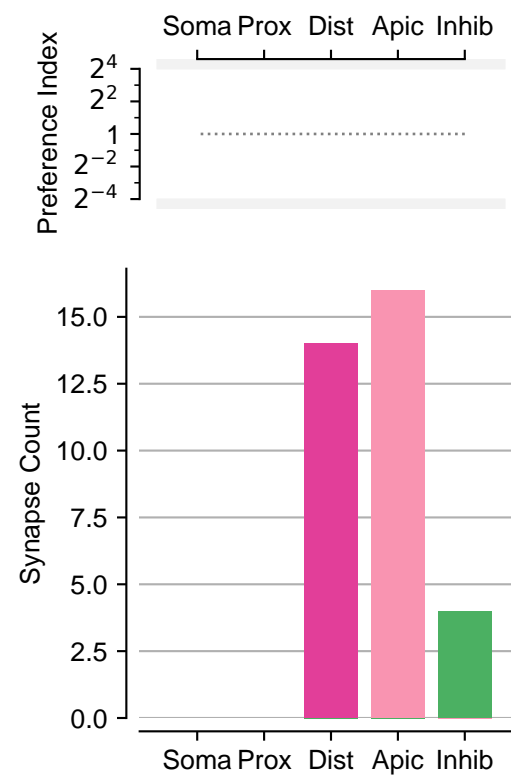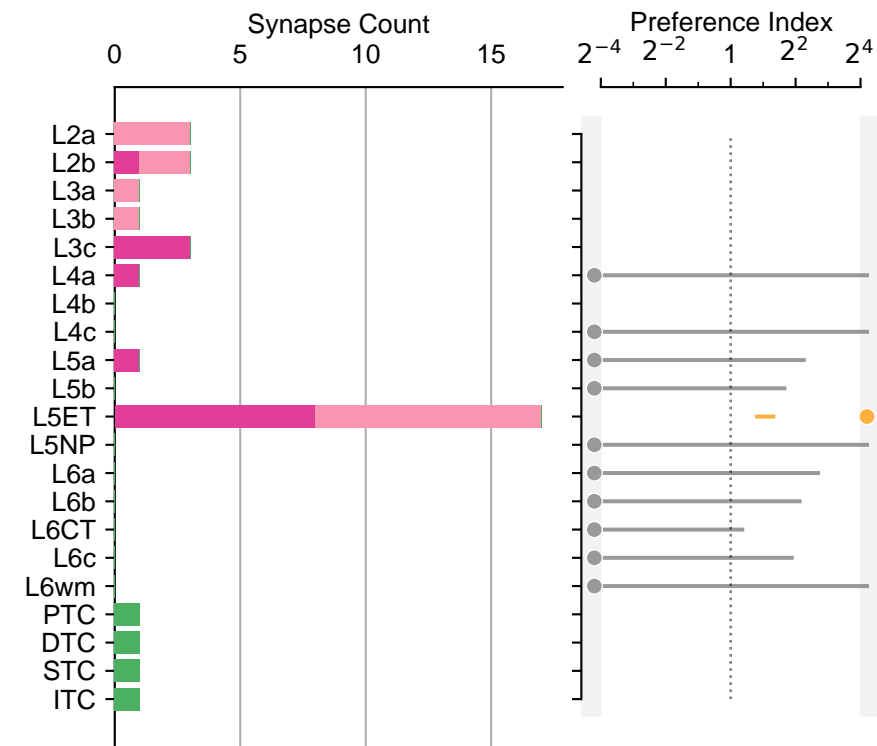

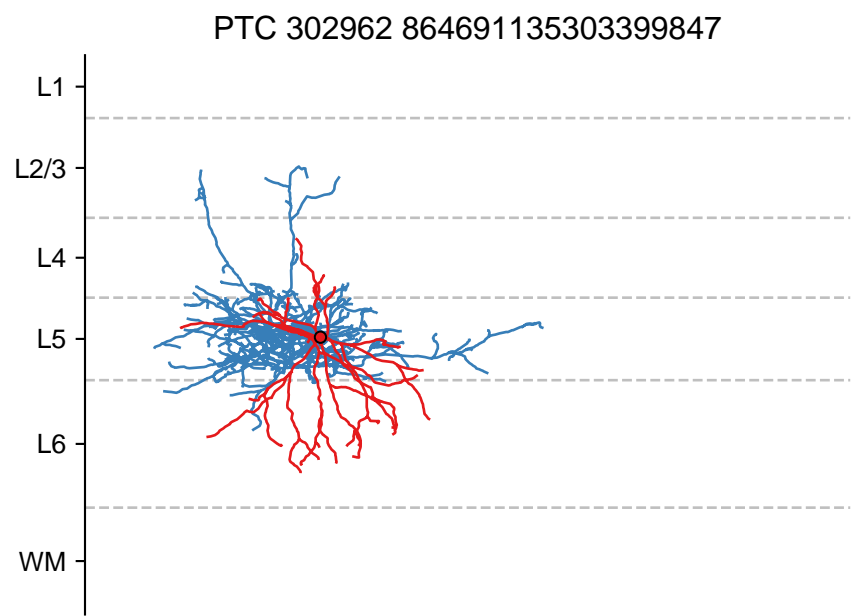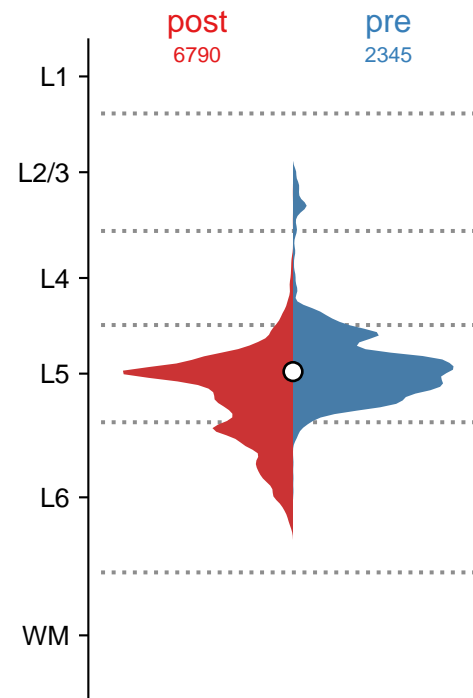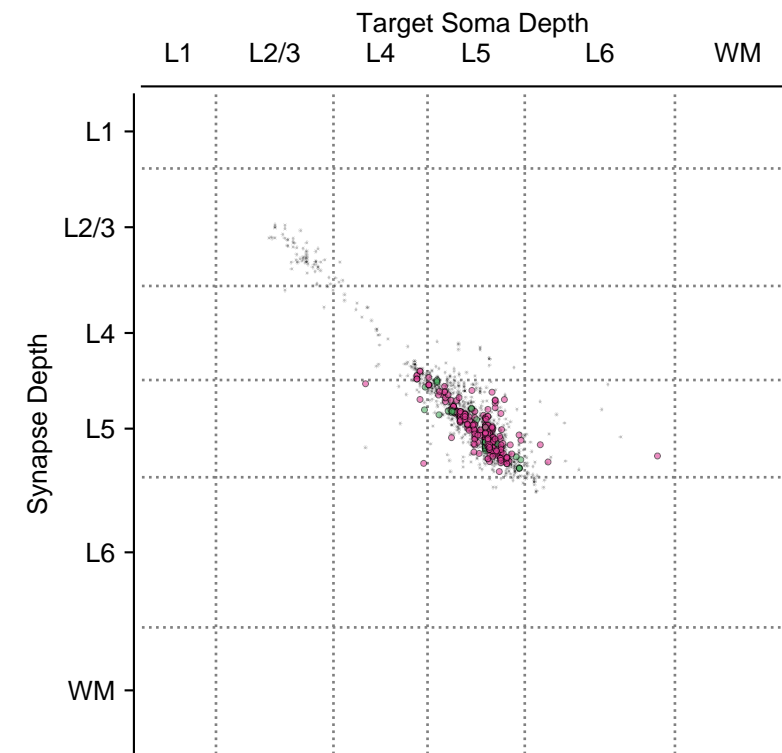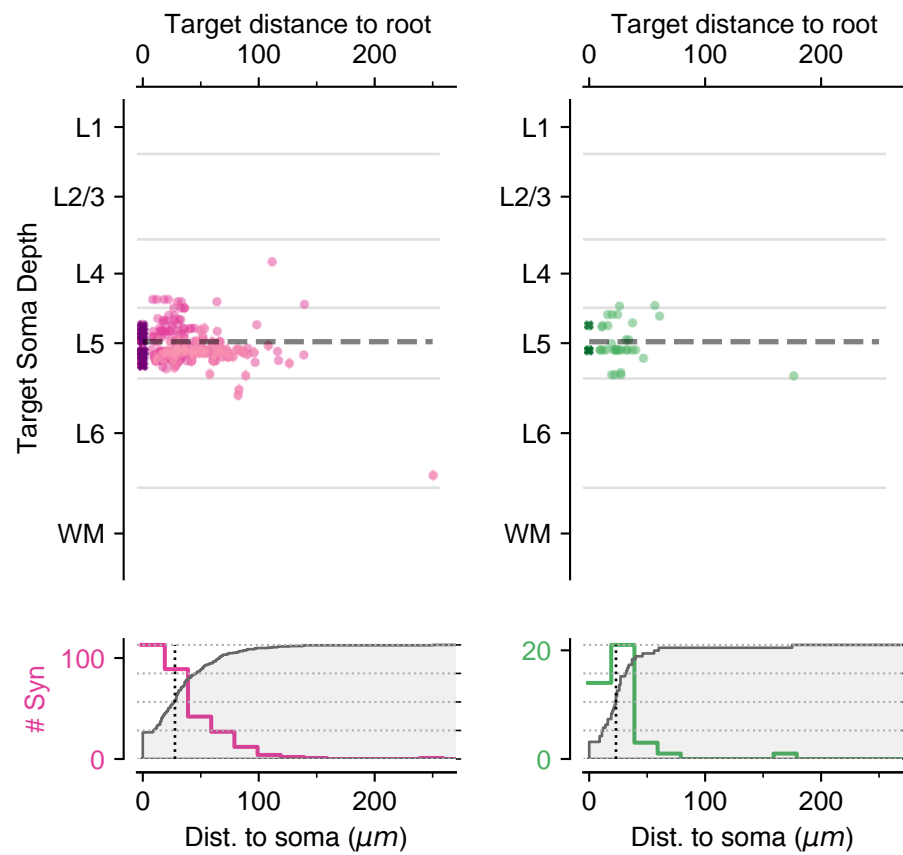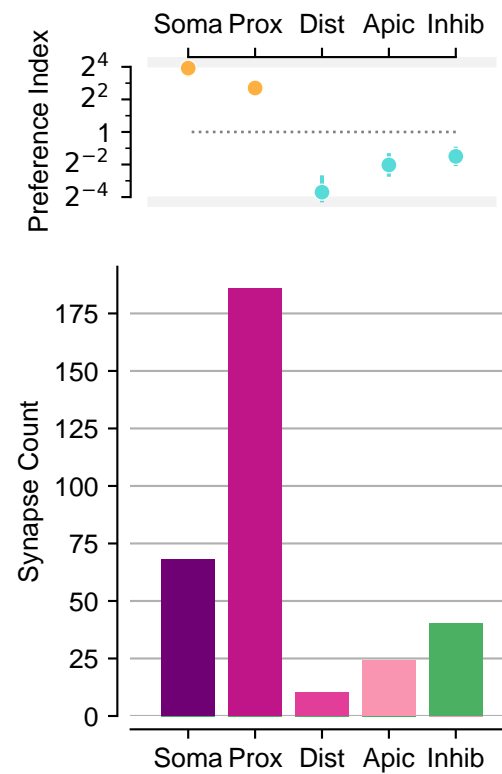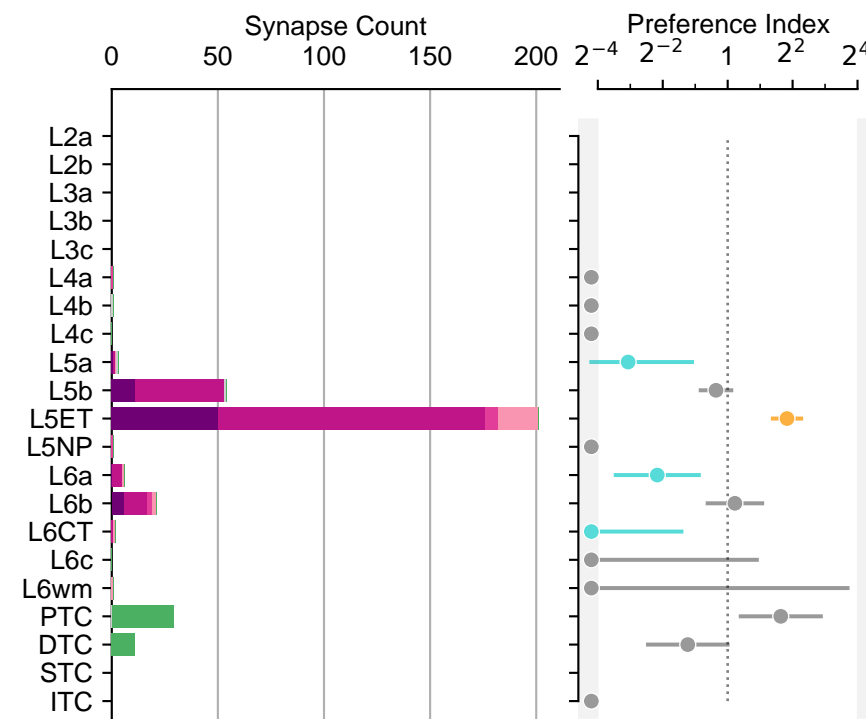

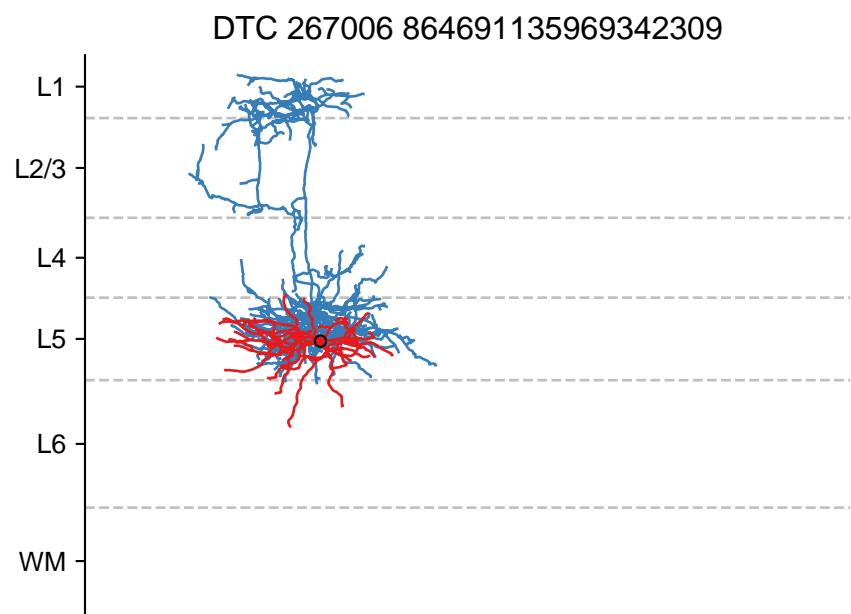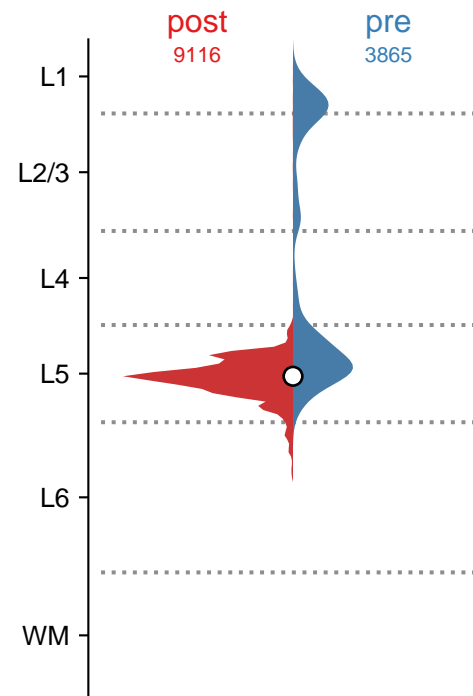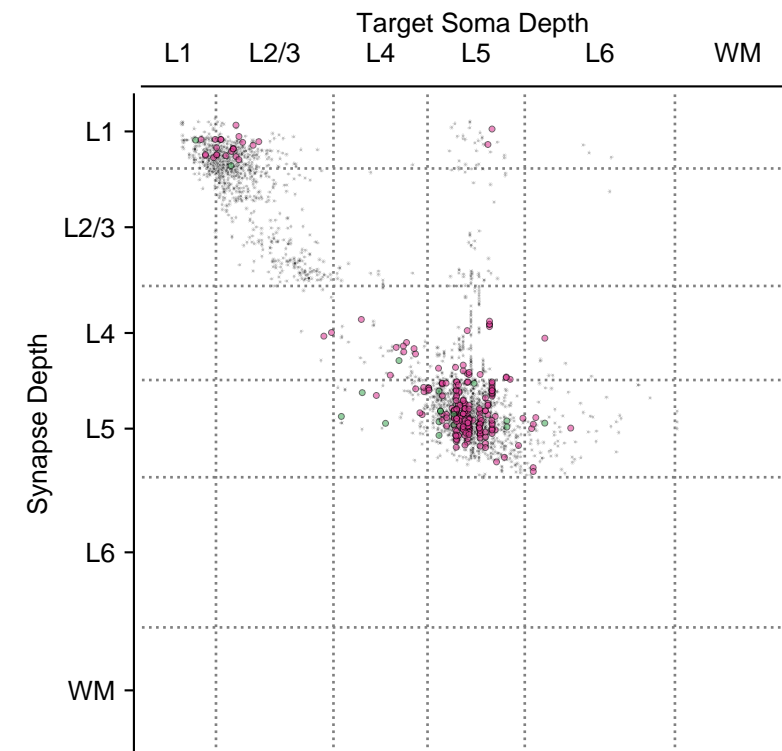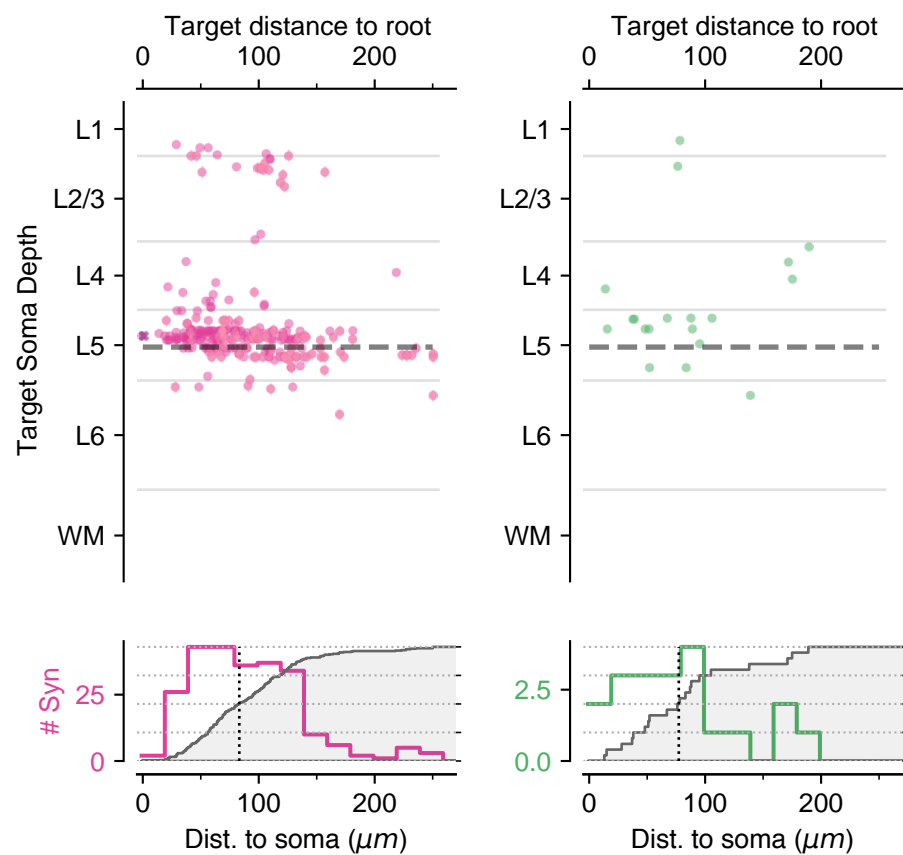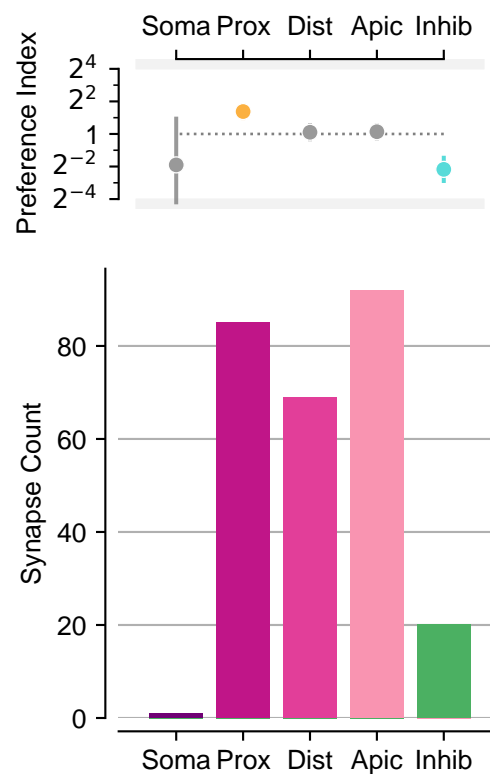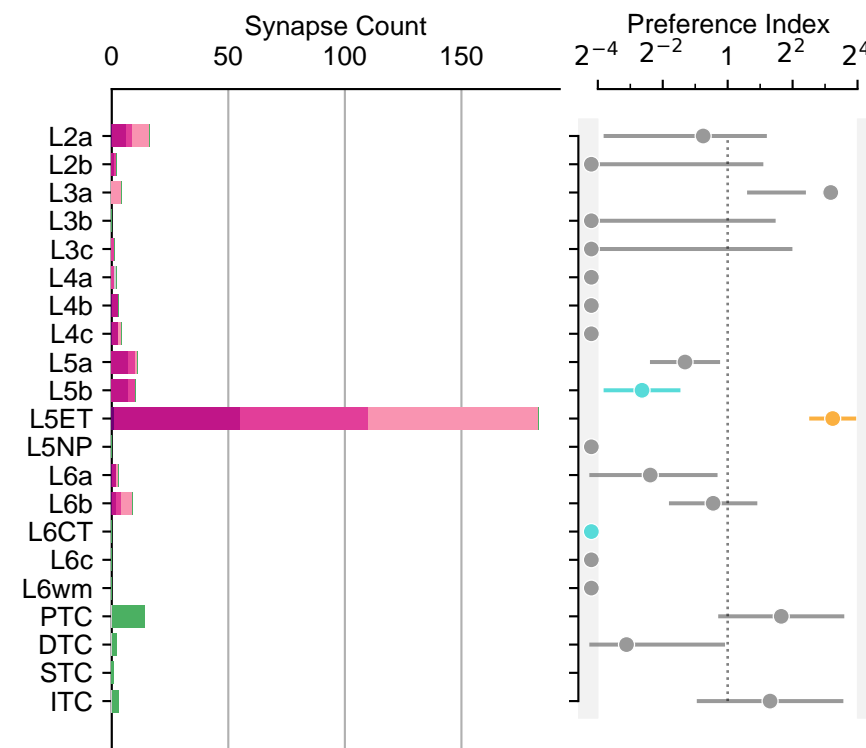



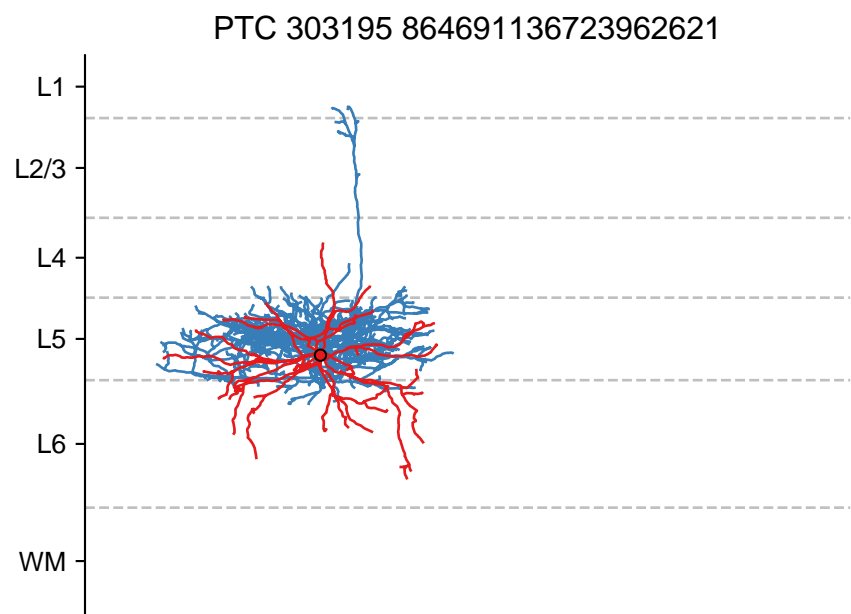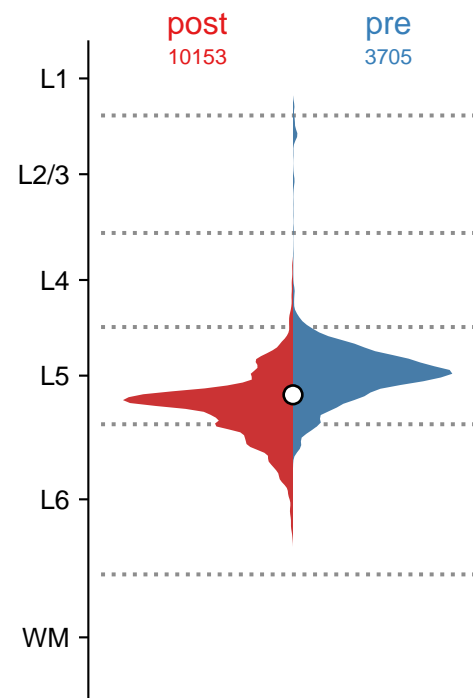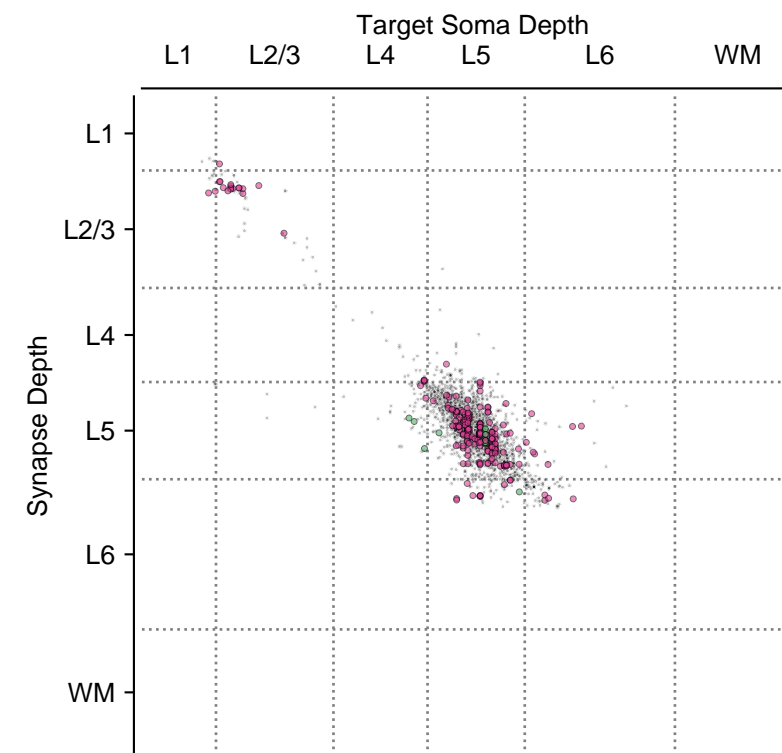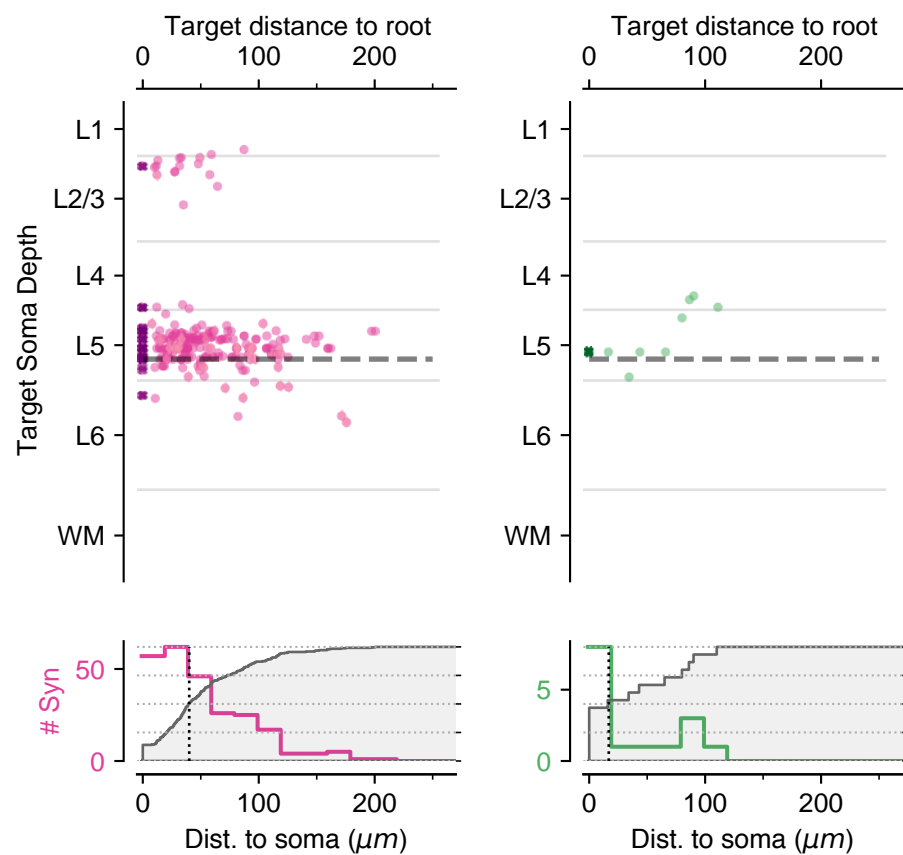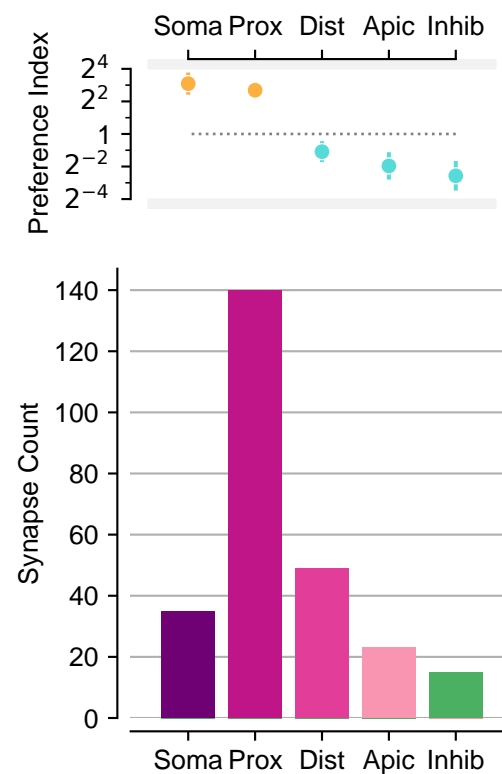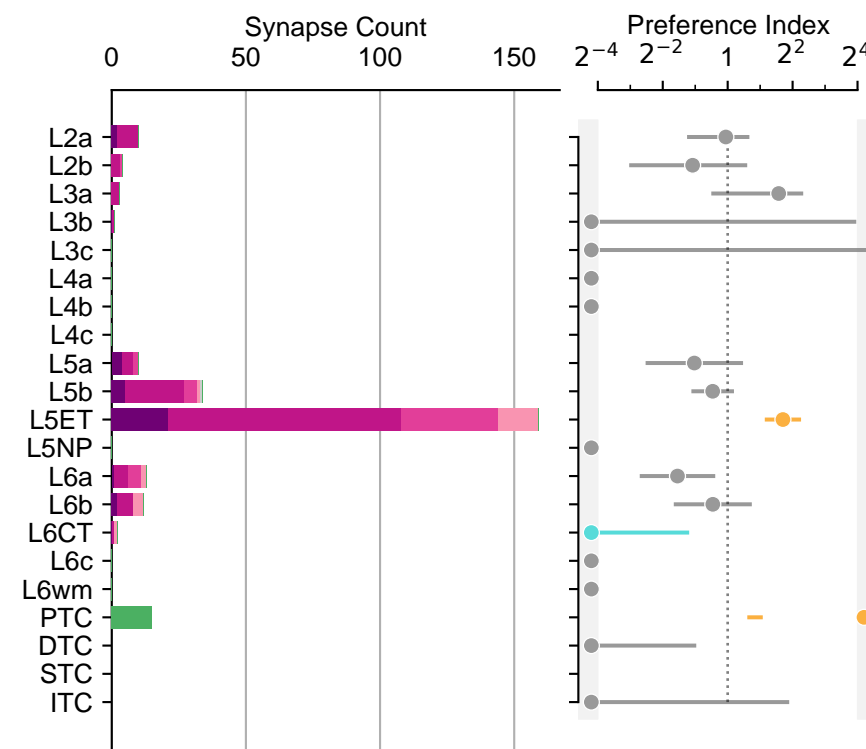

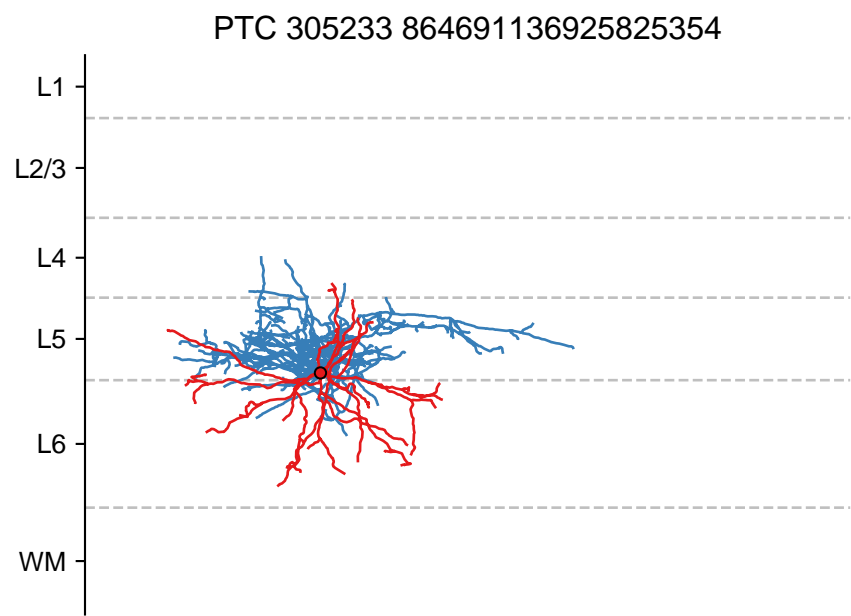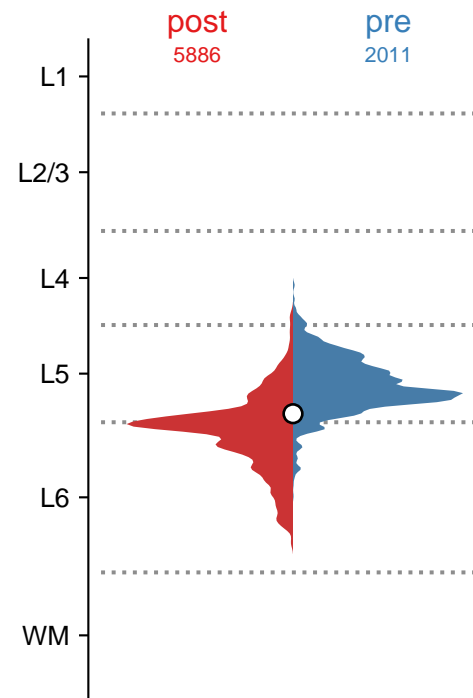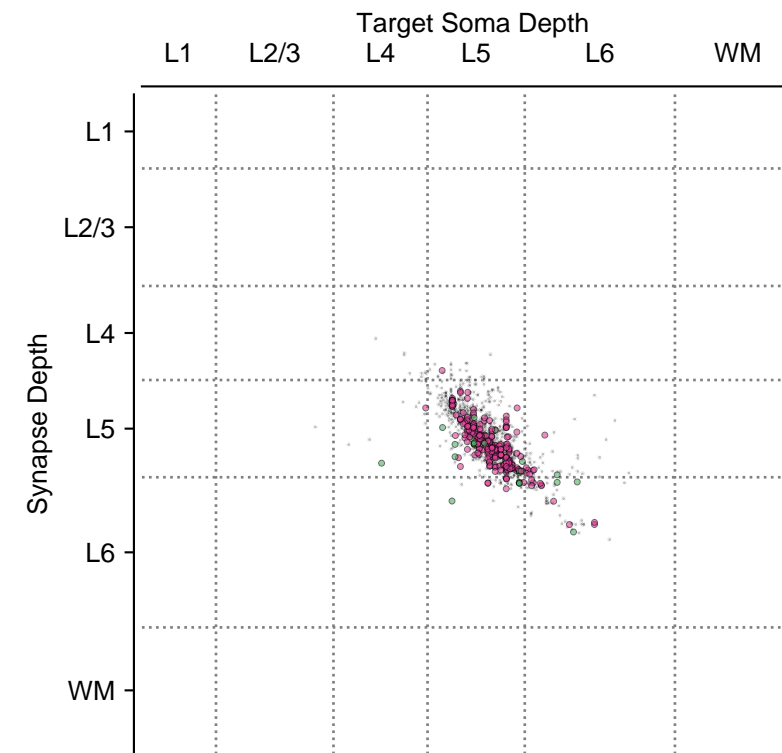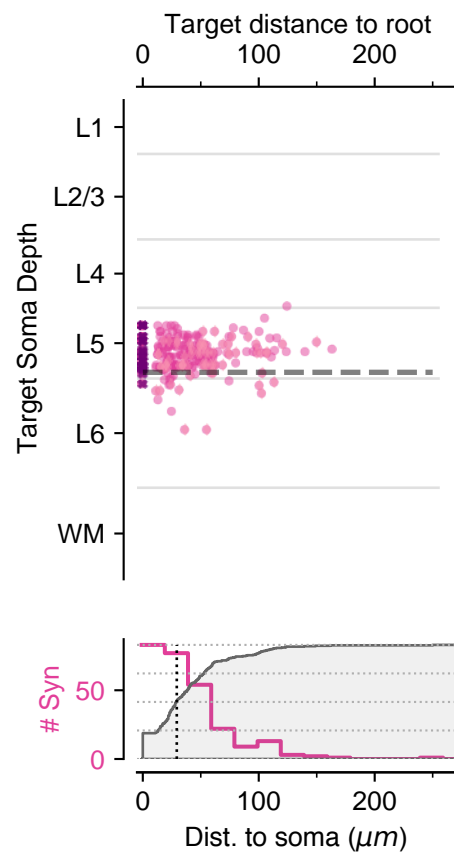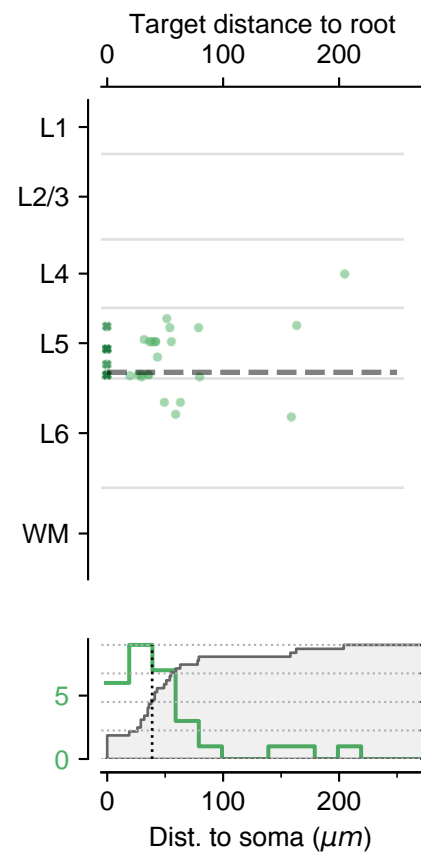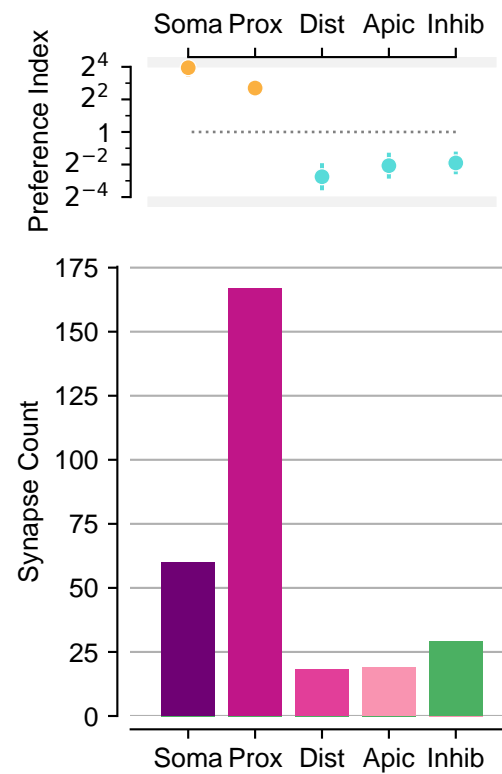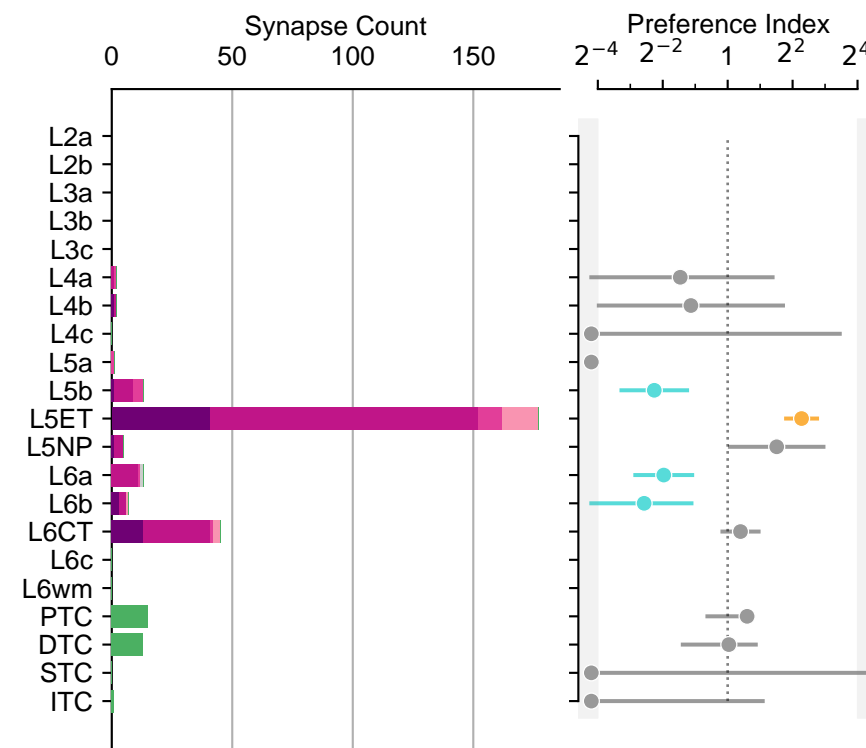

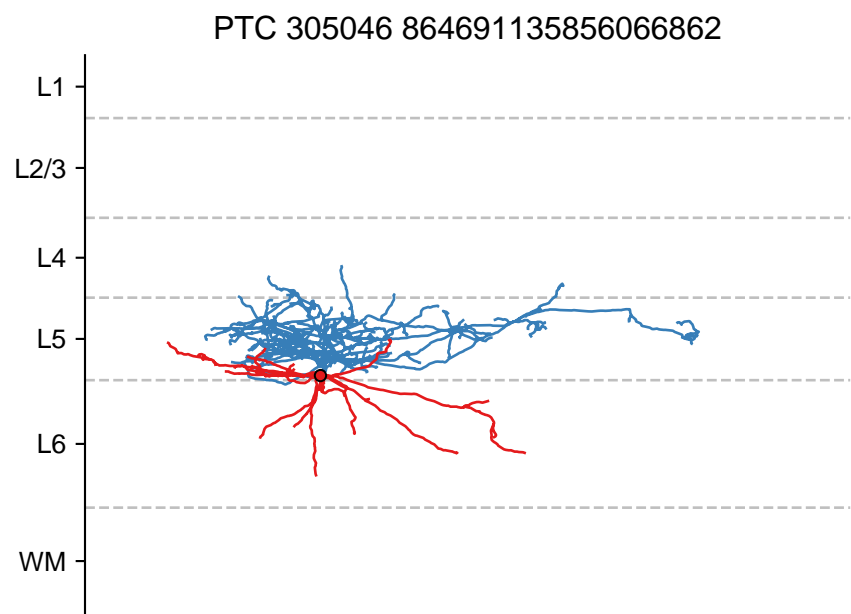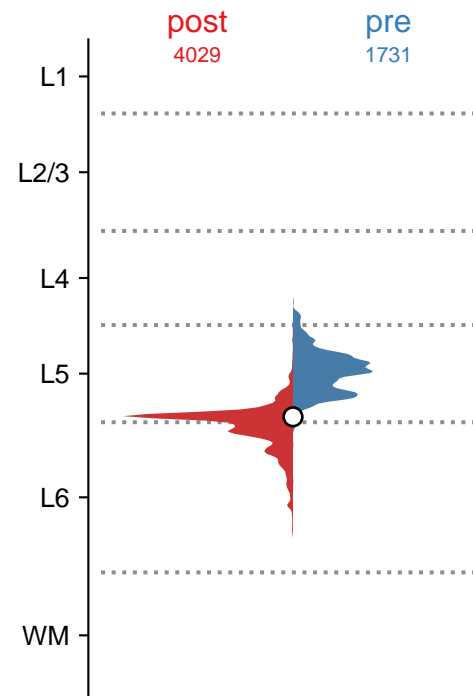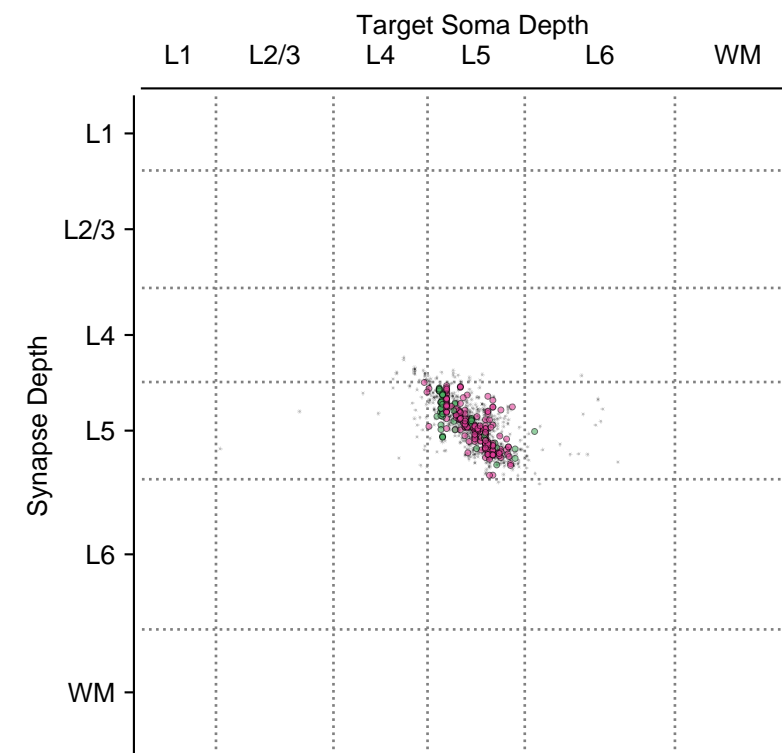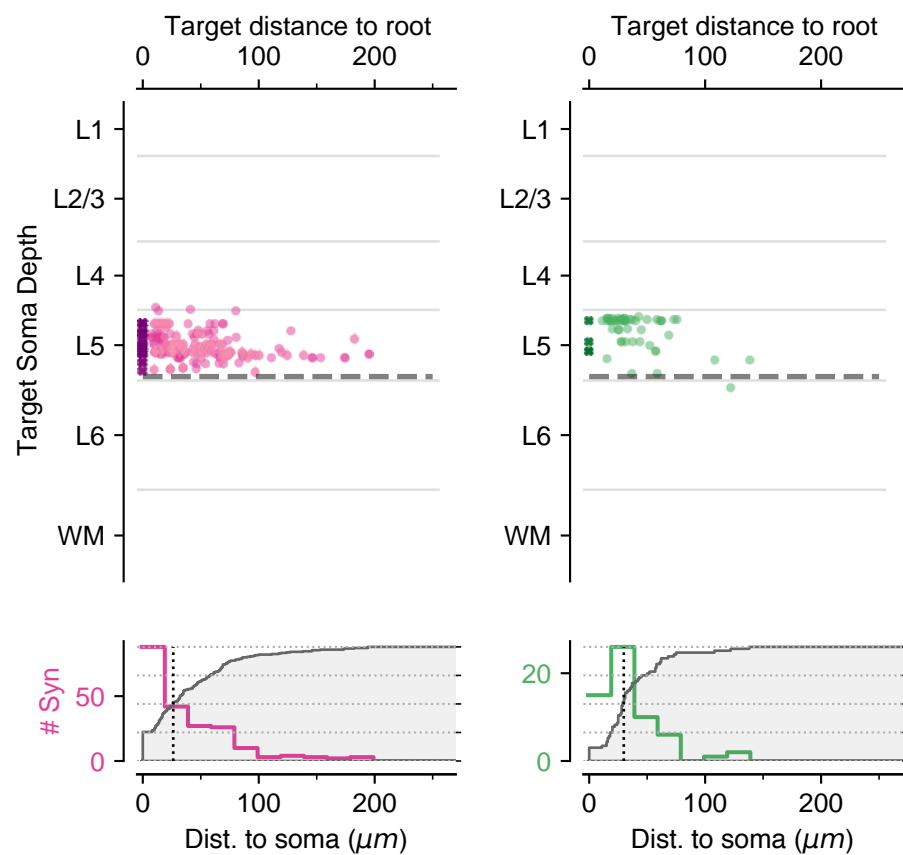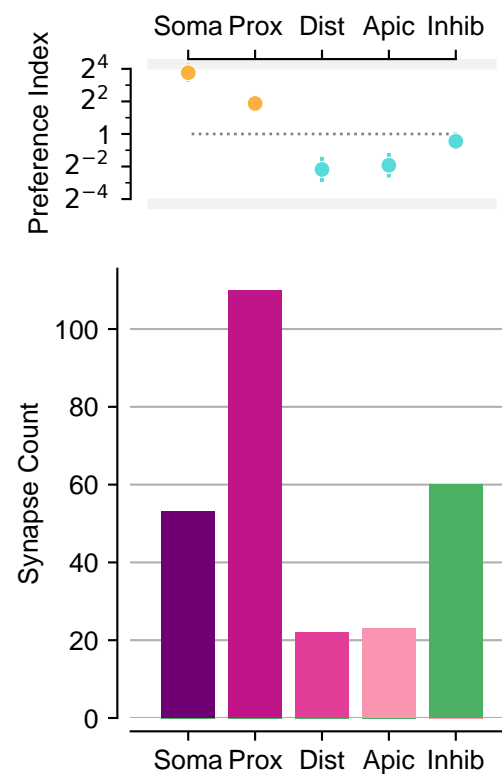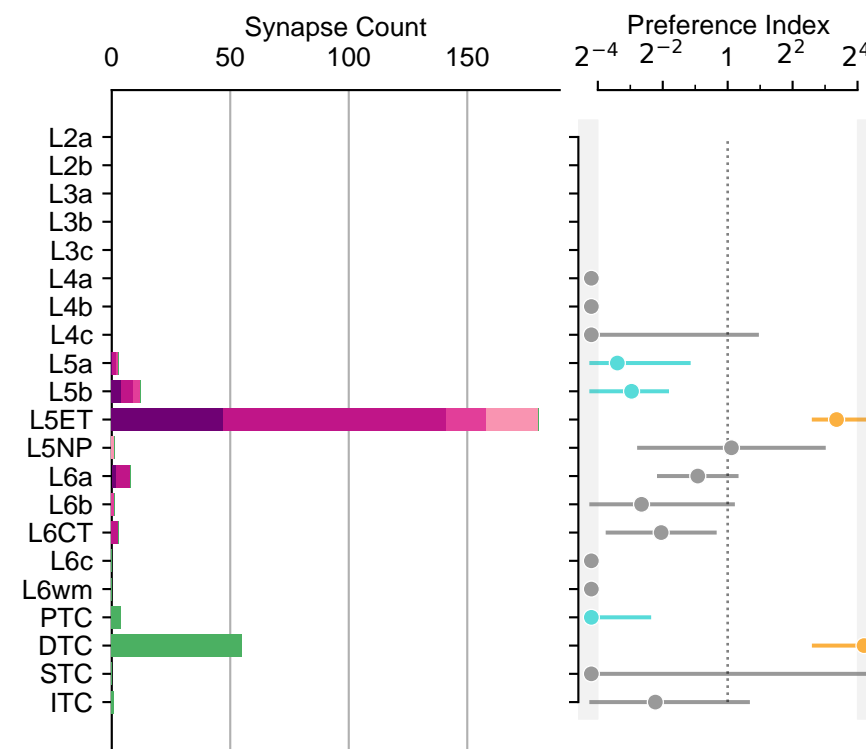

# Group 13

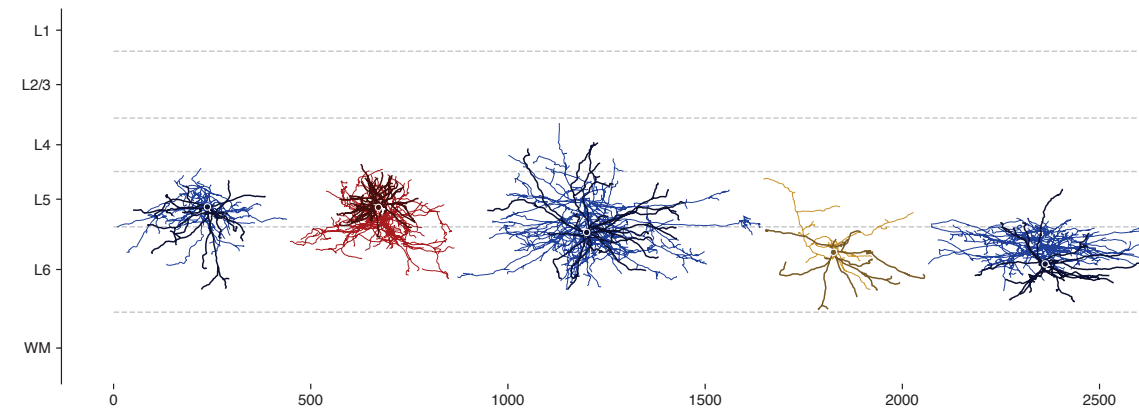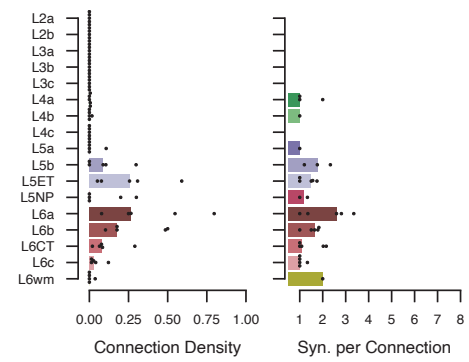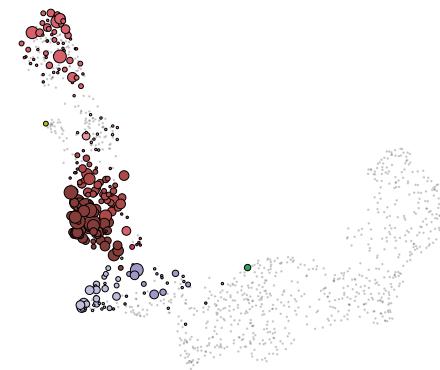

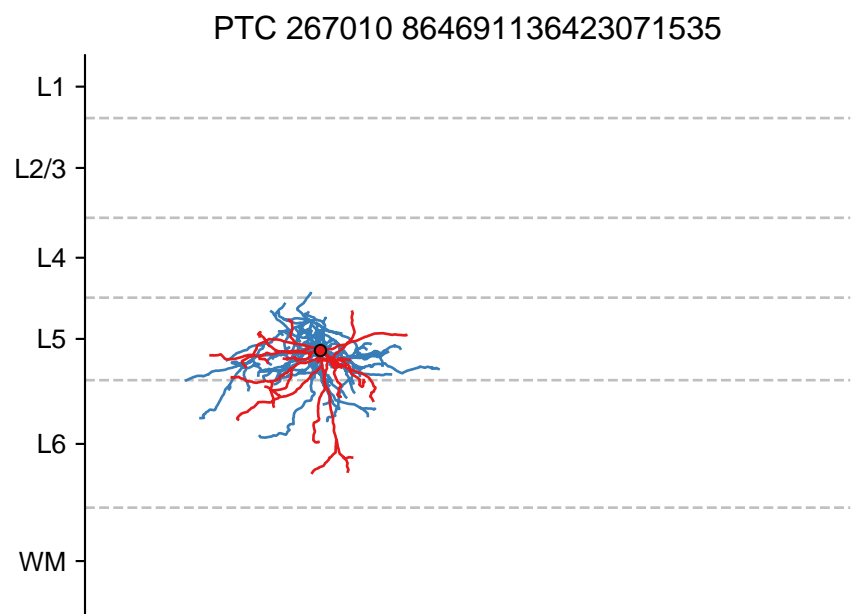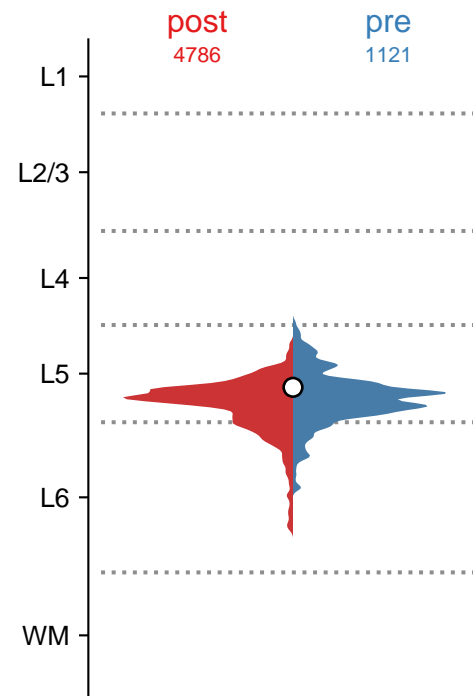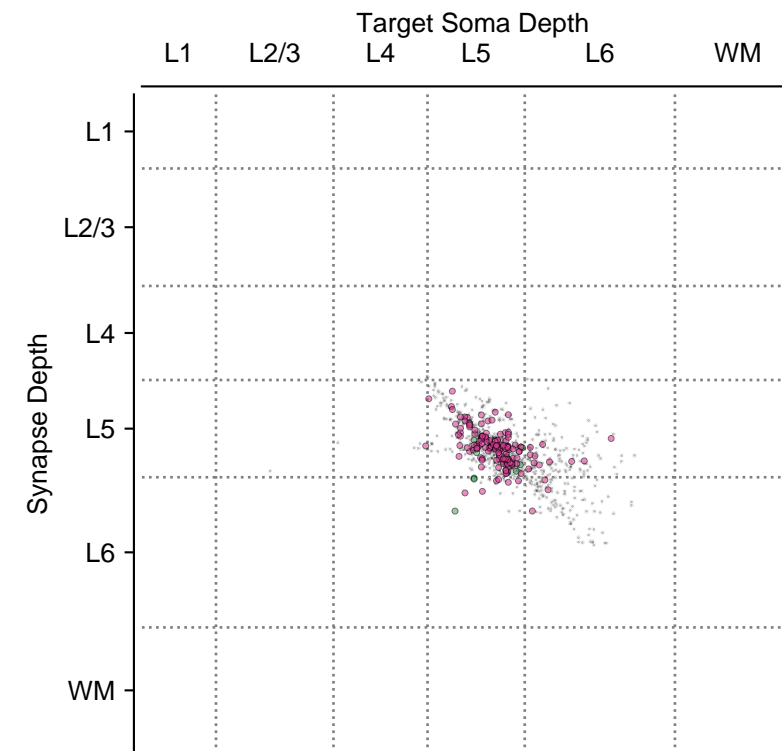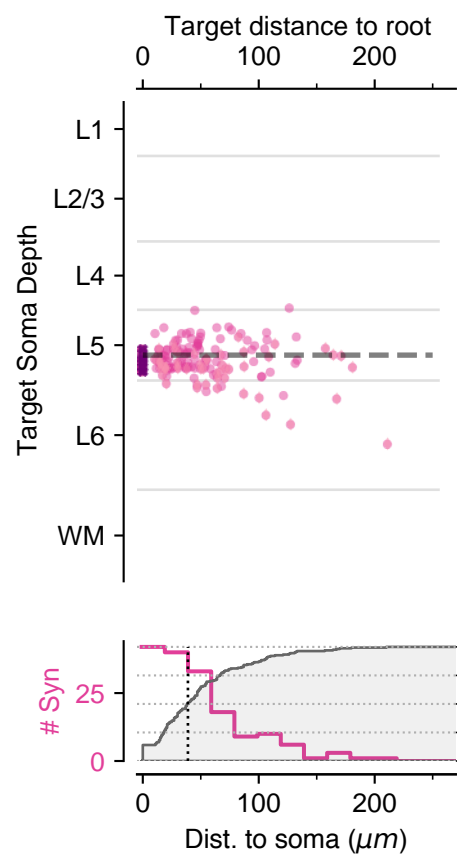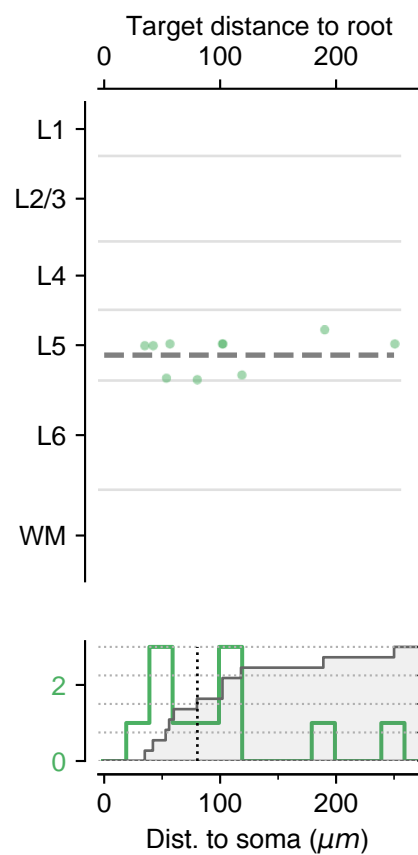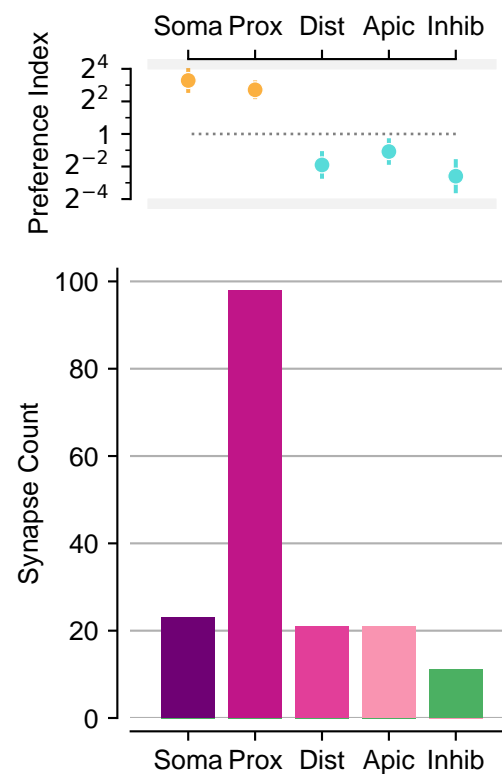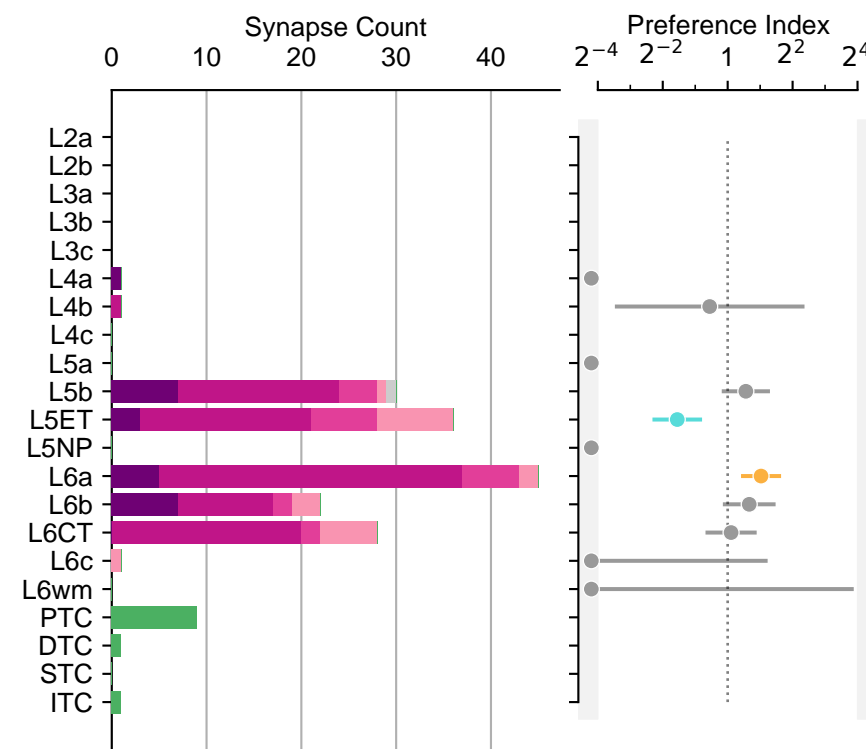

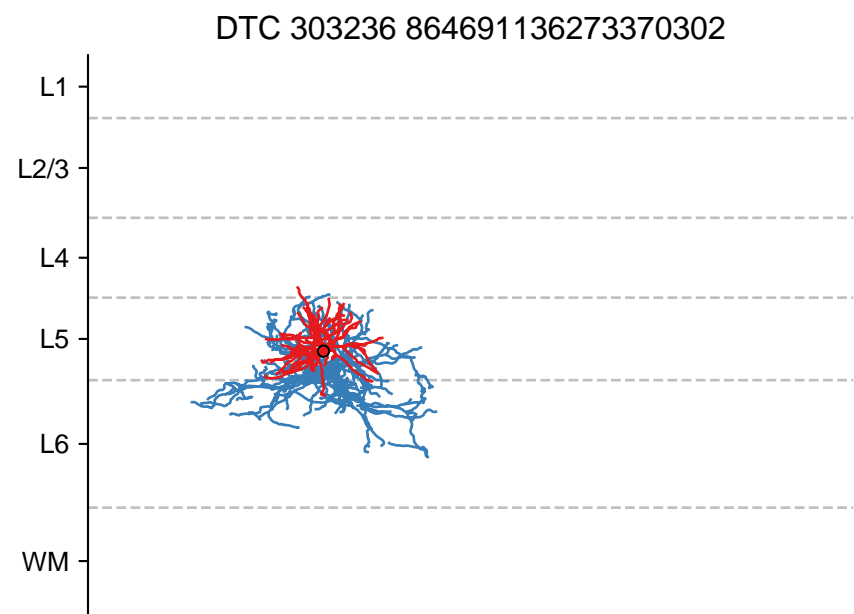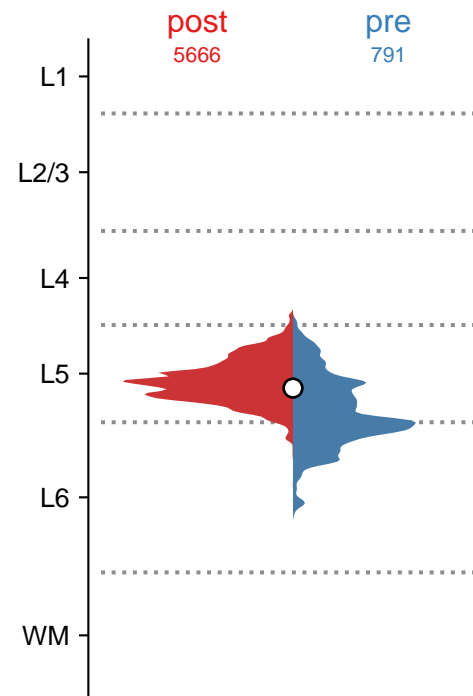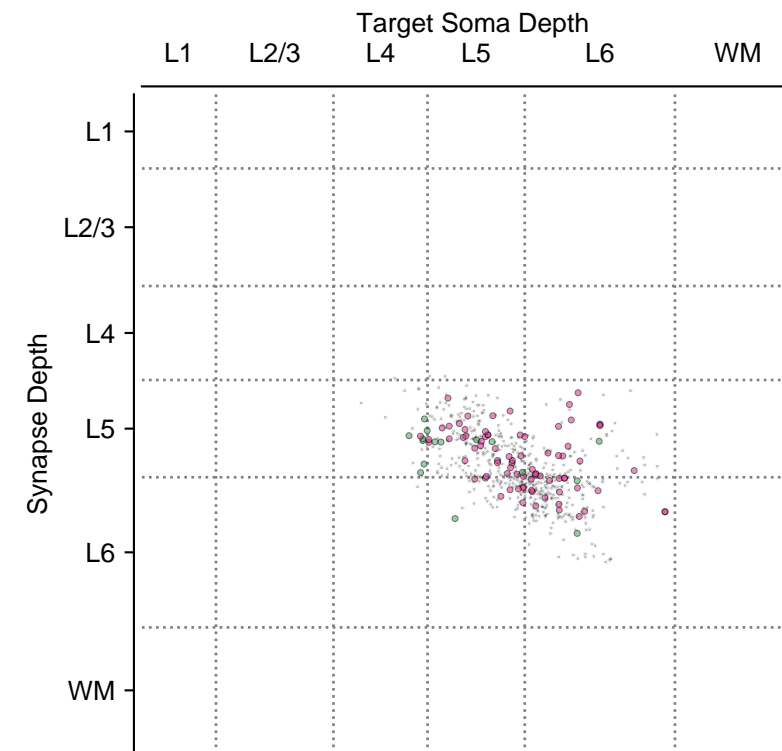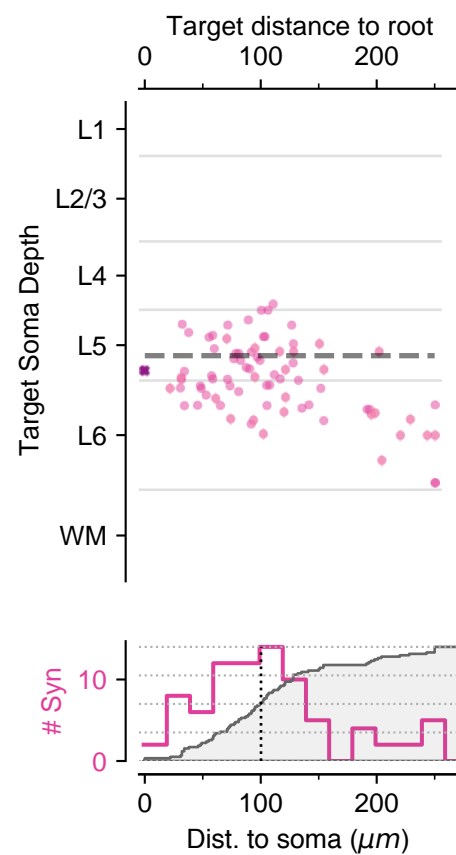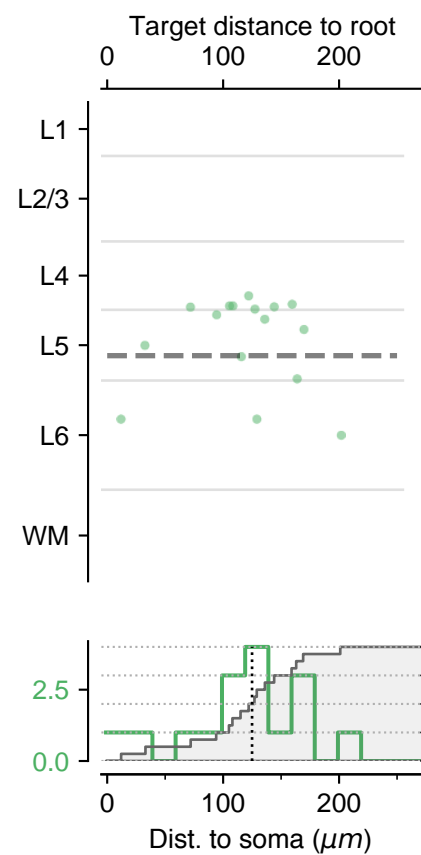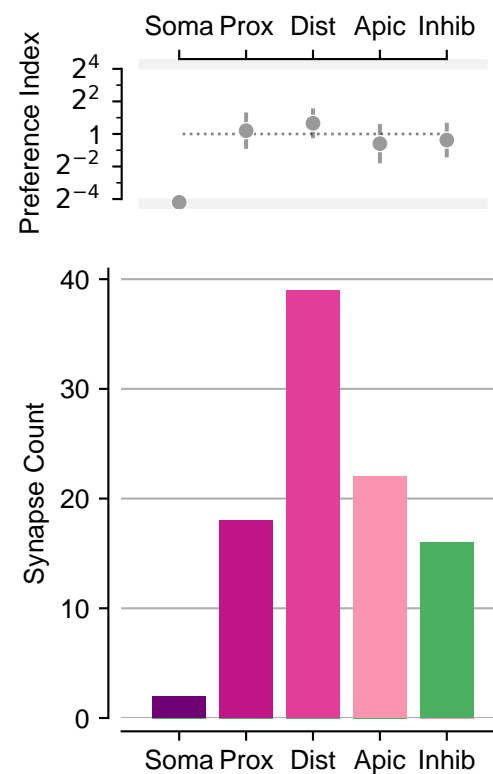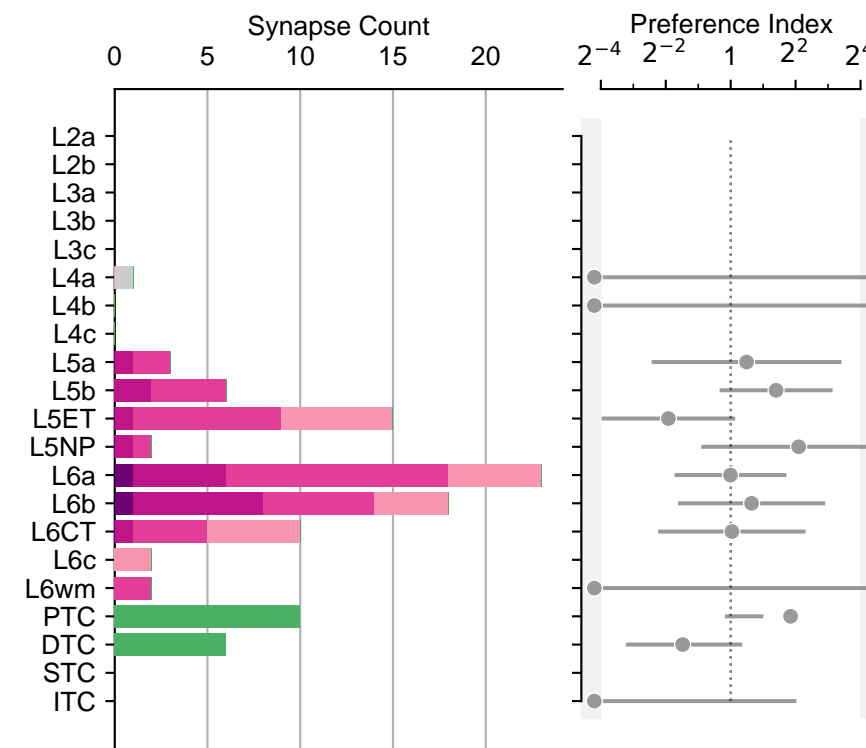

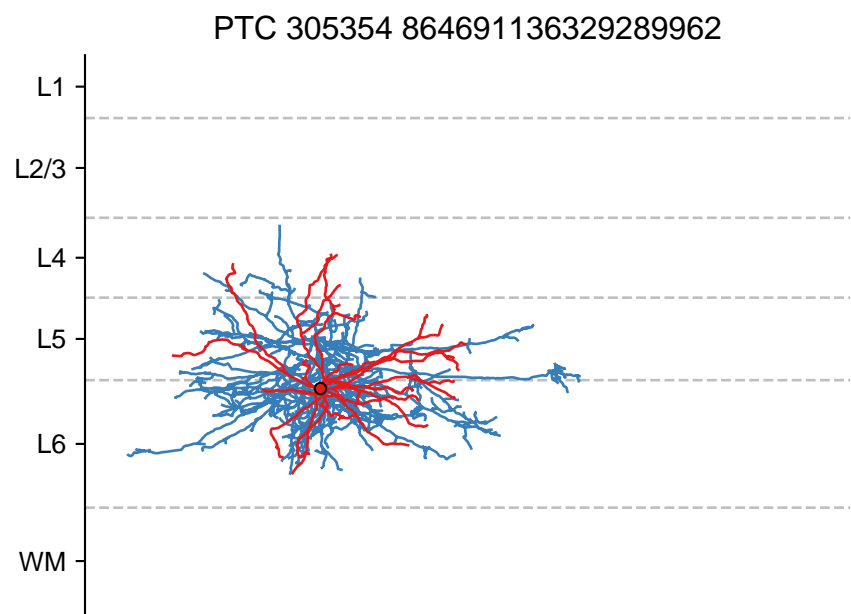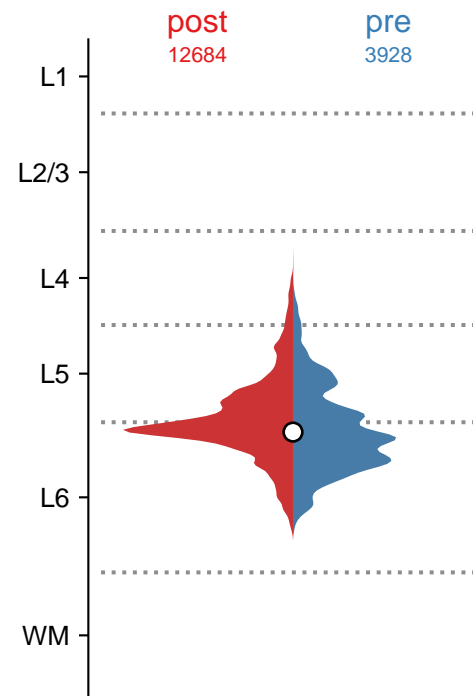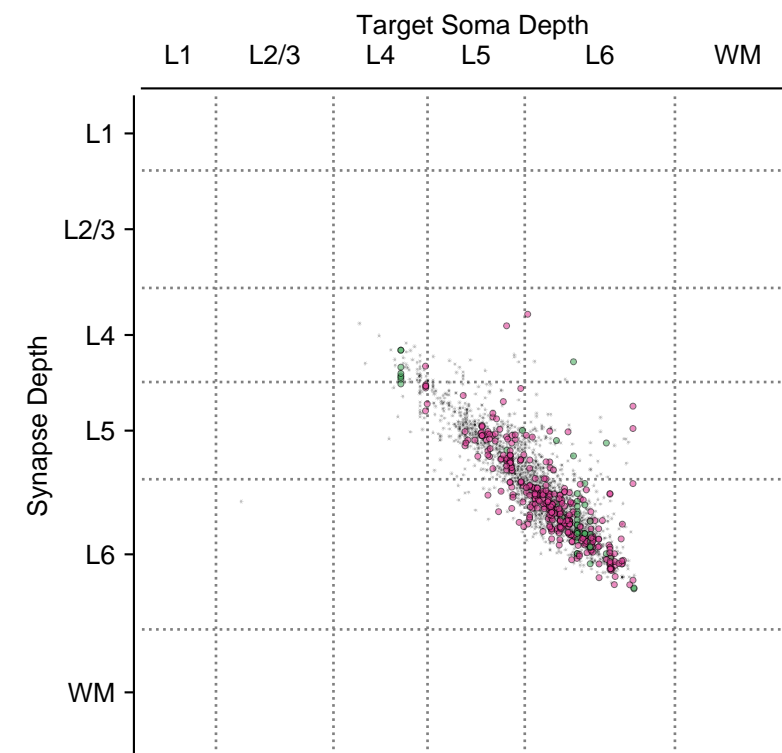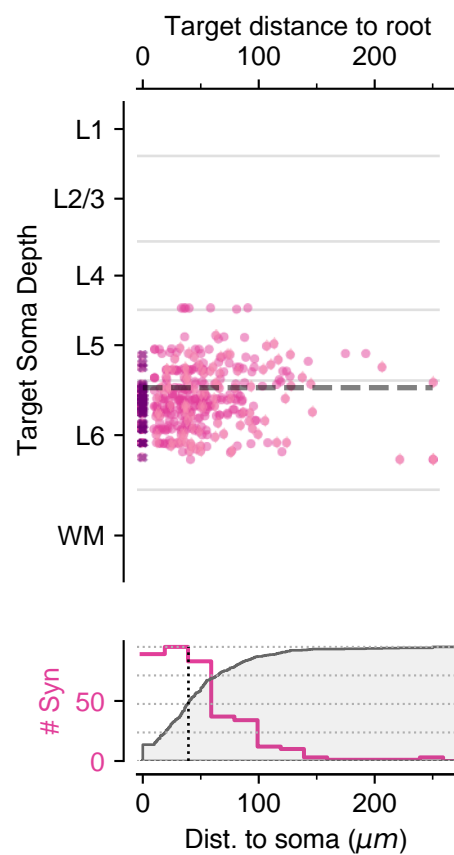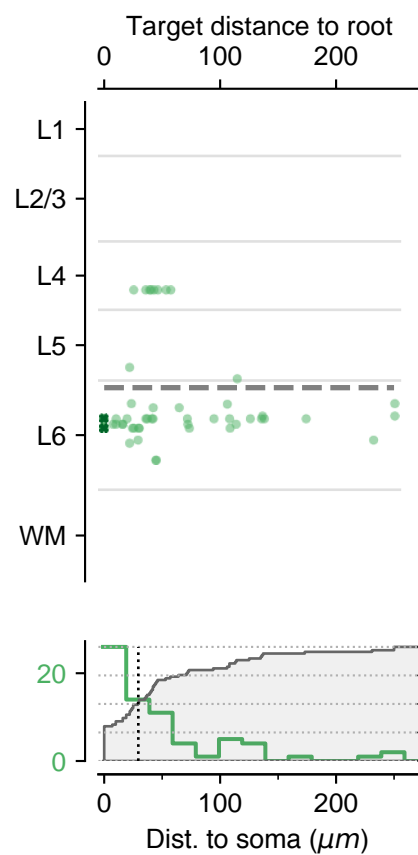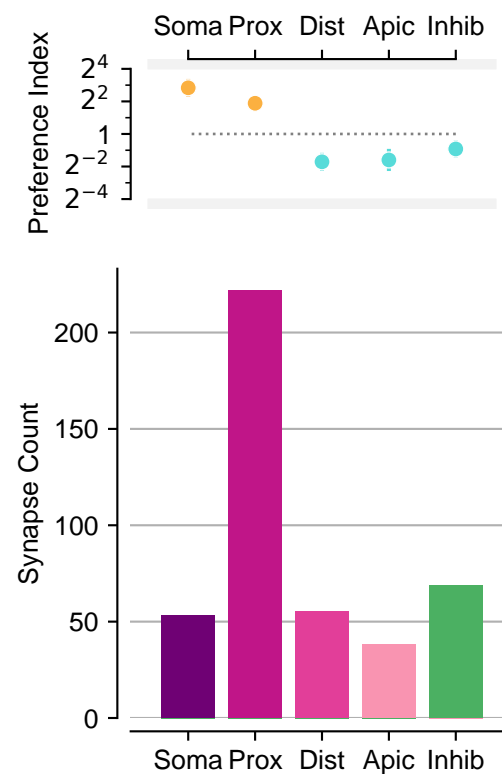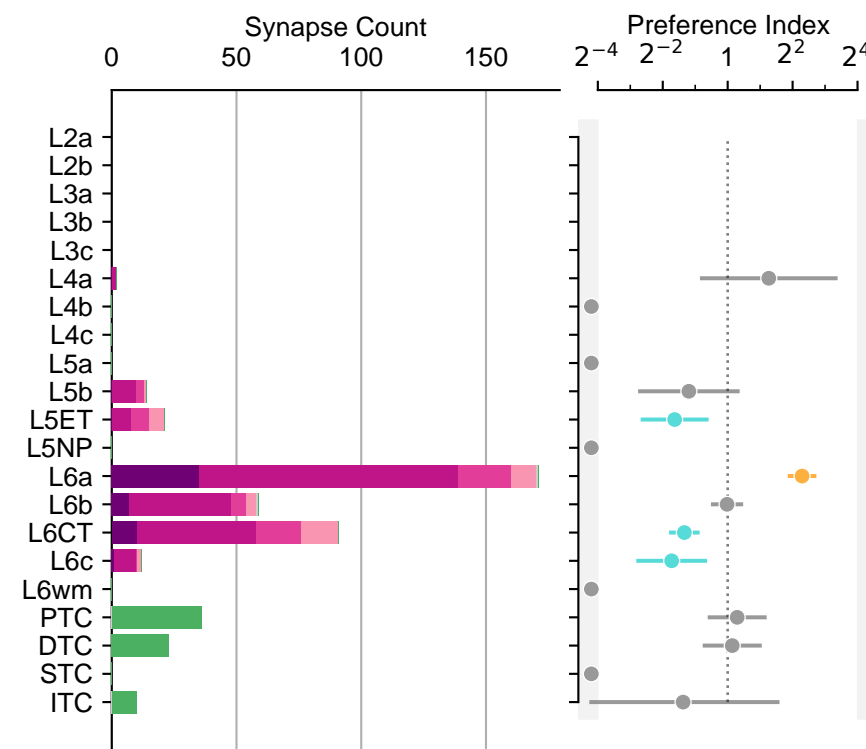

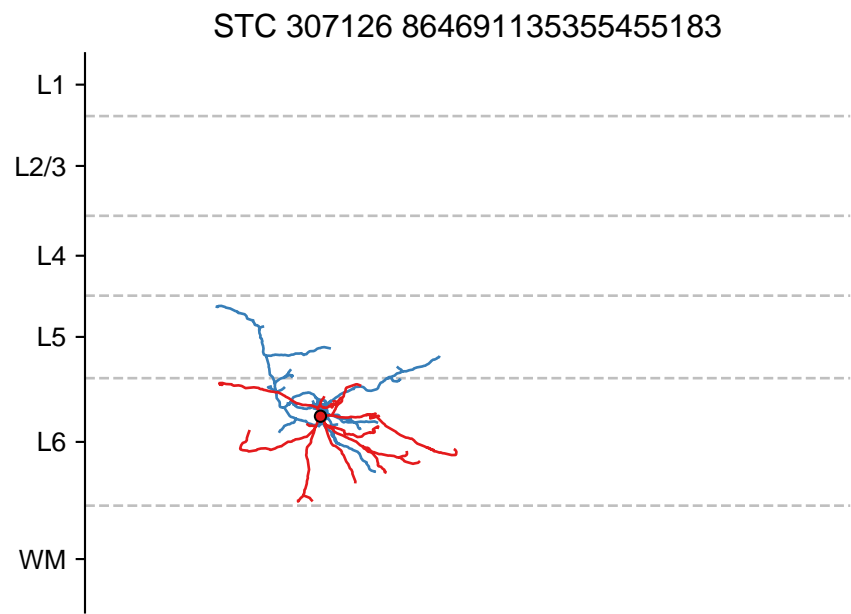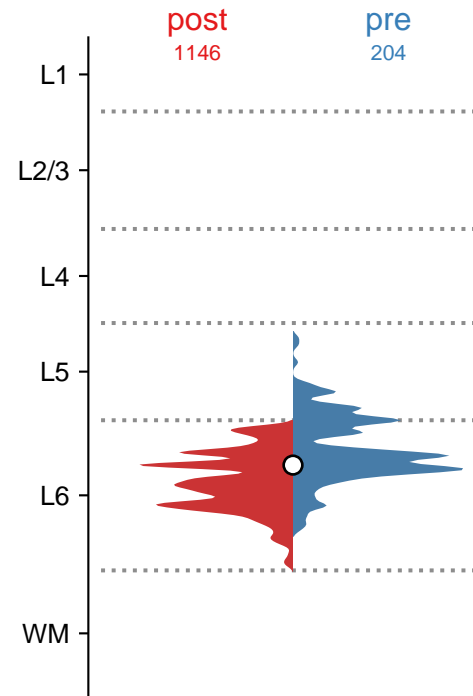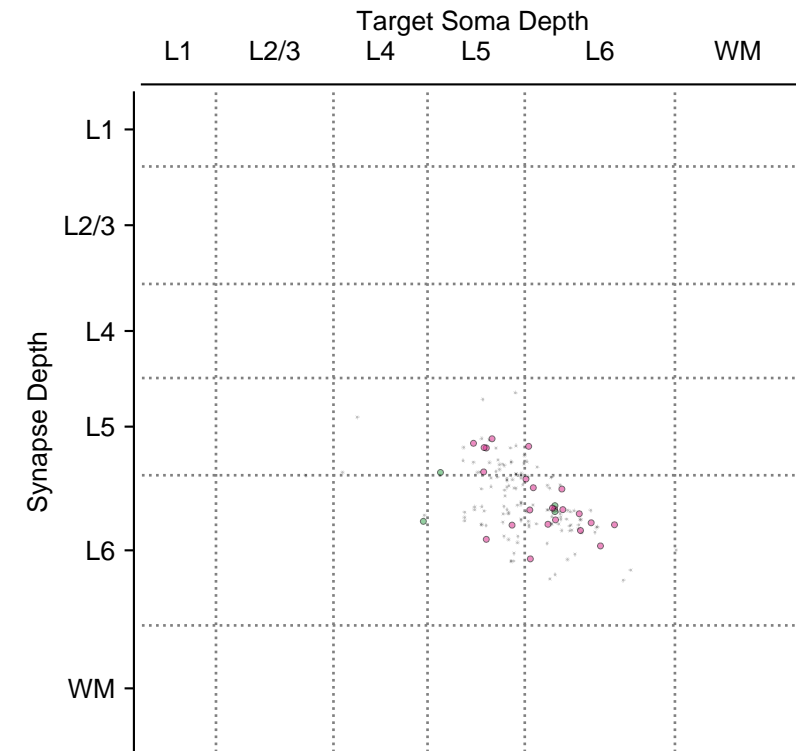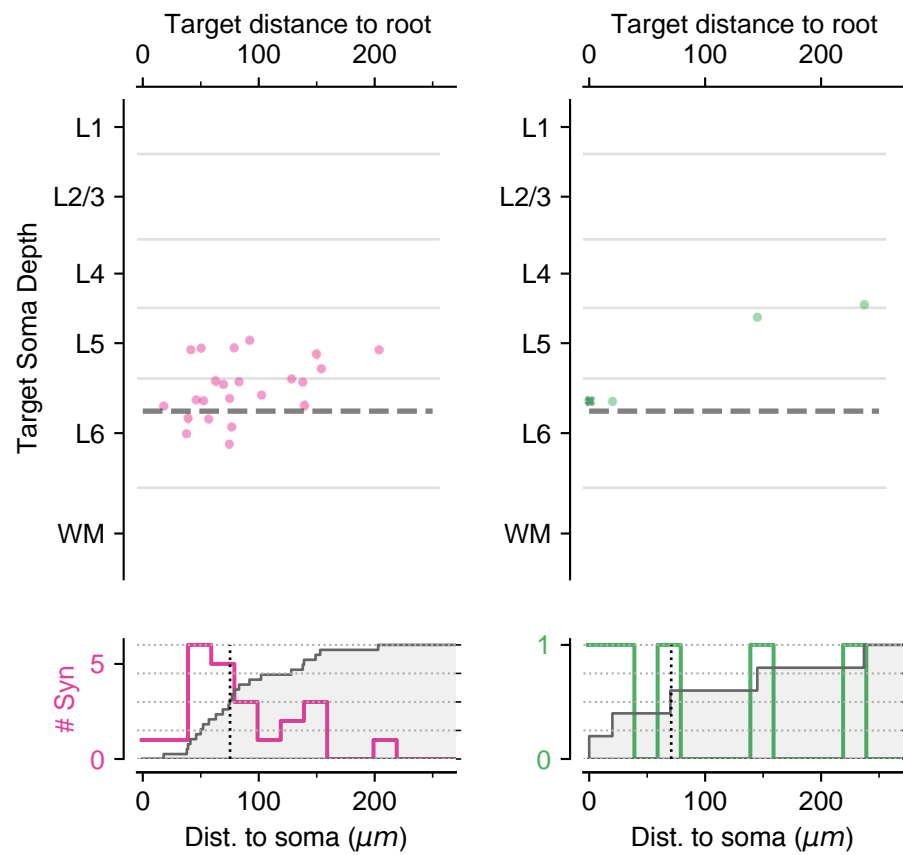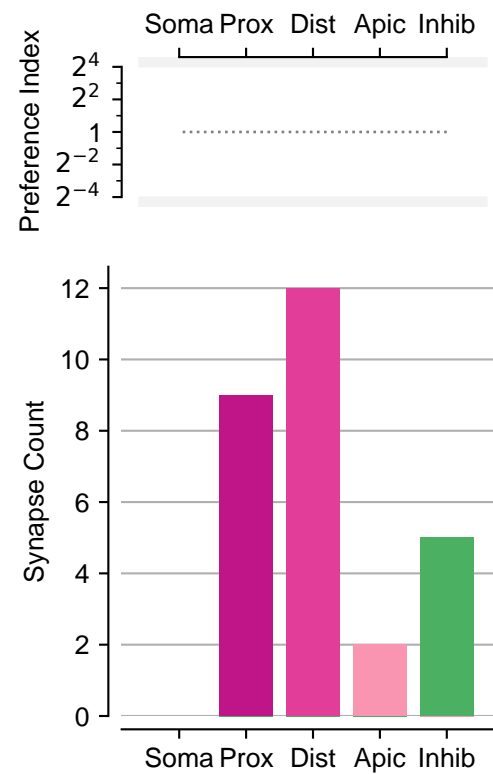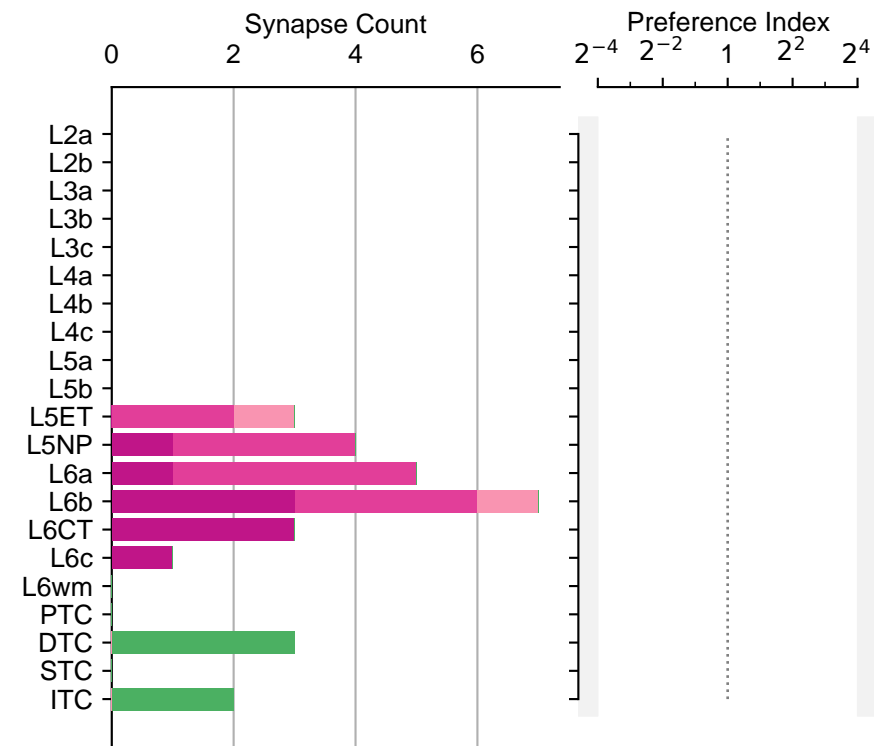



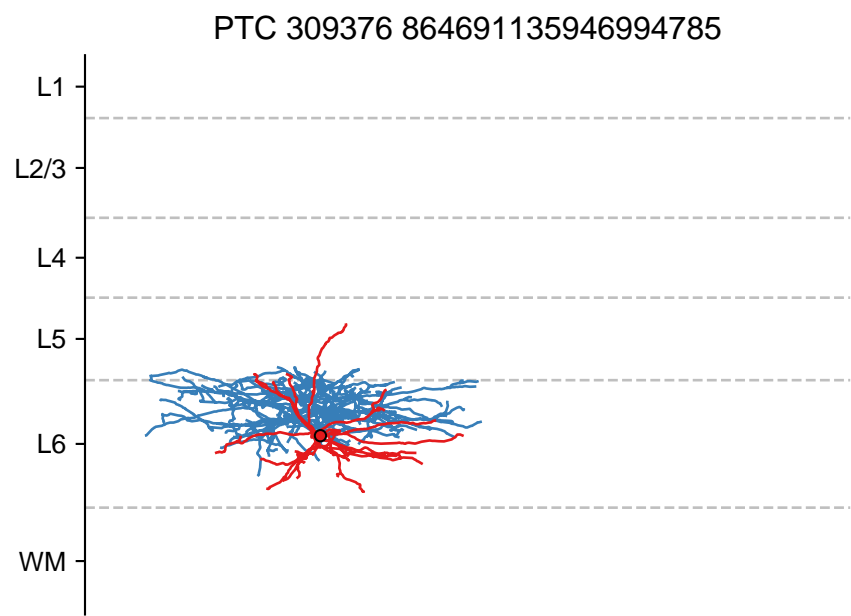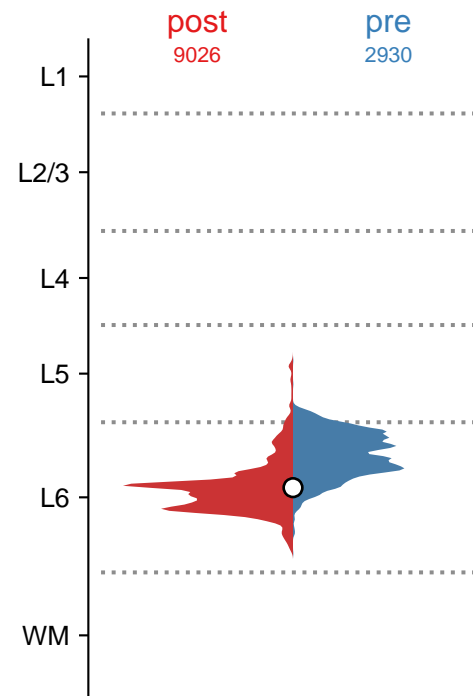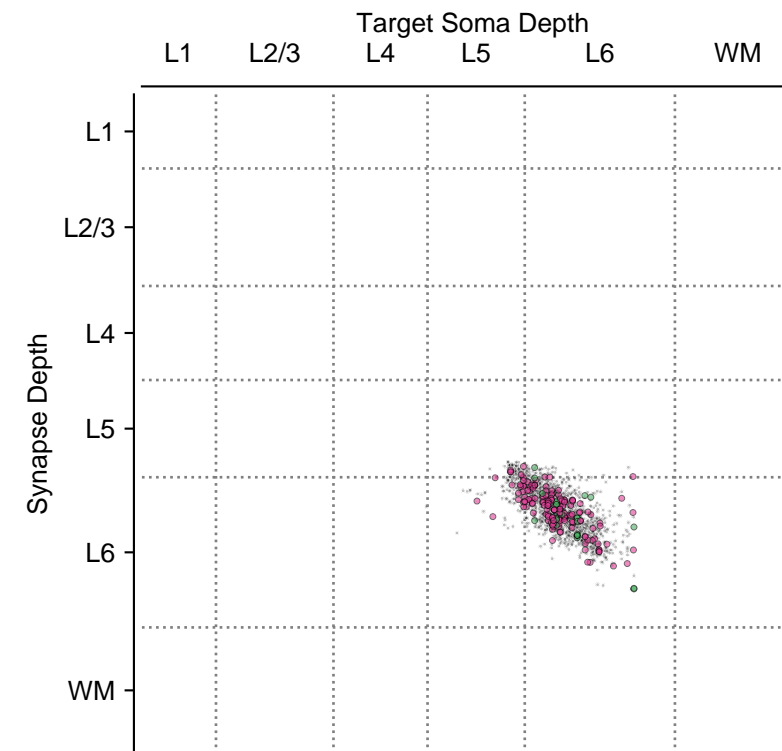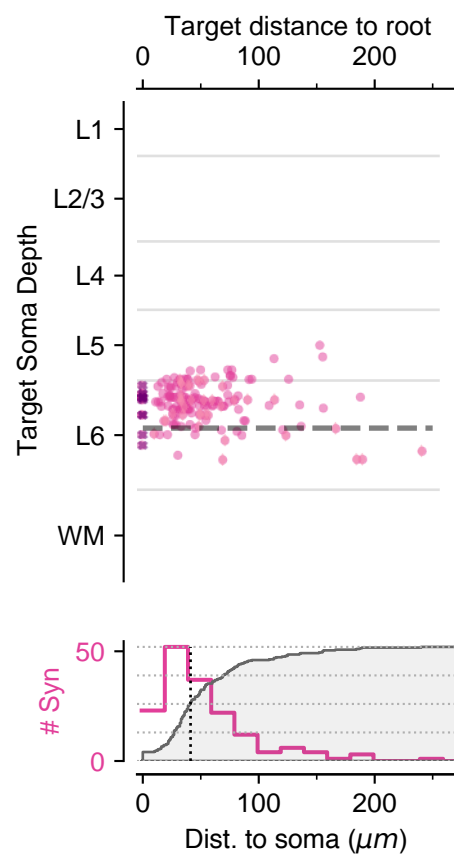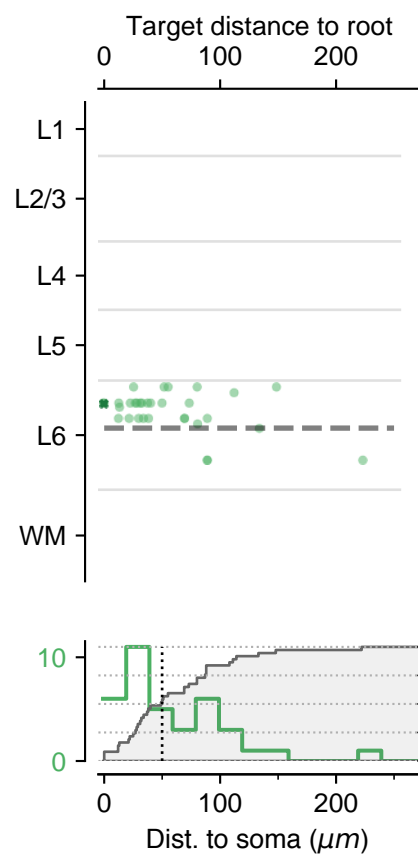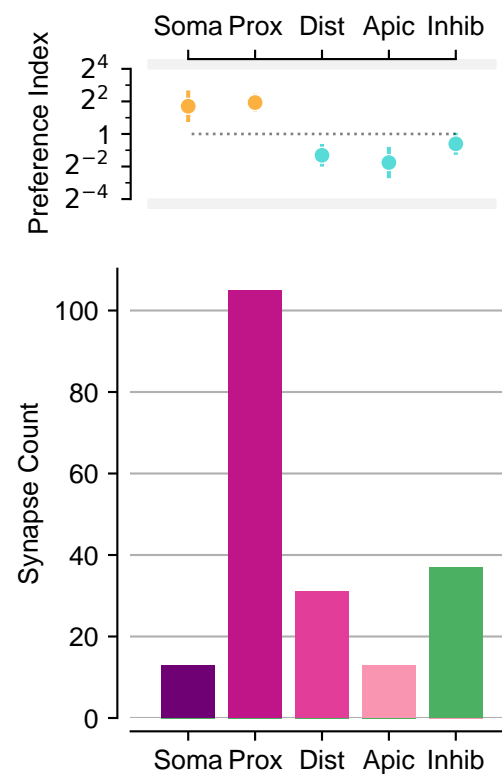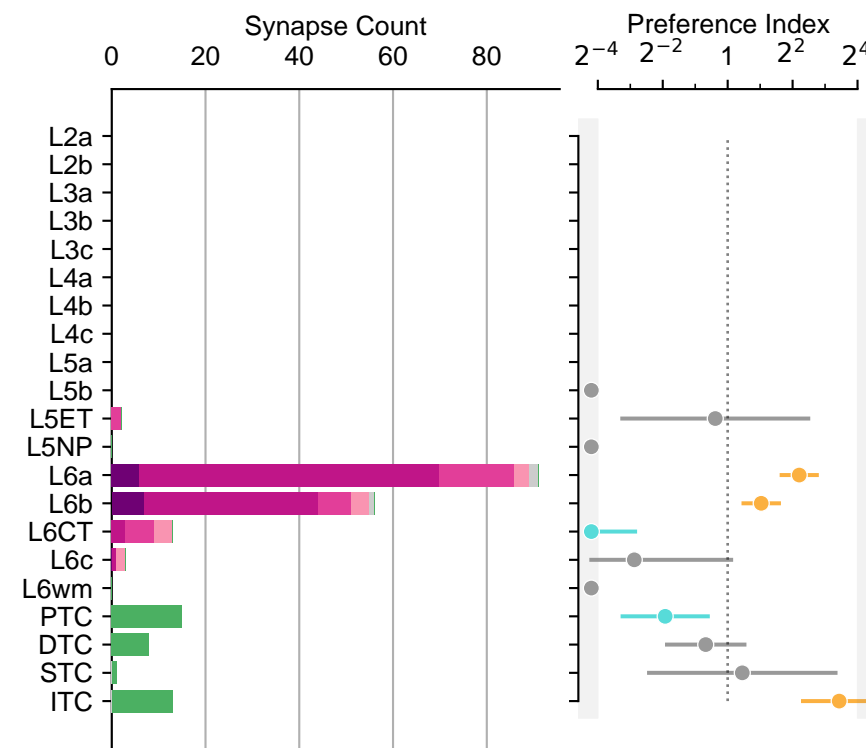

# Group 14

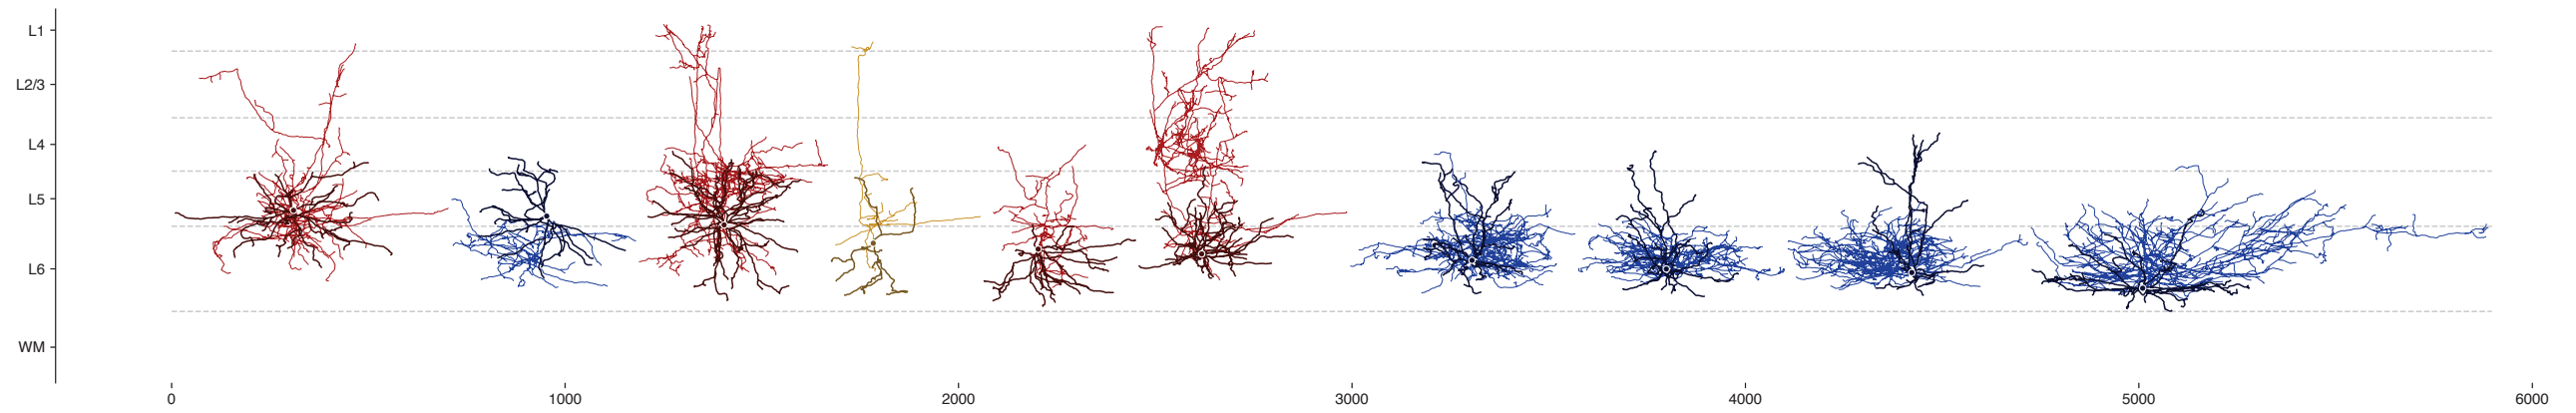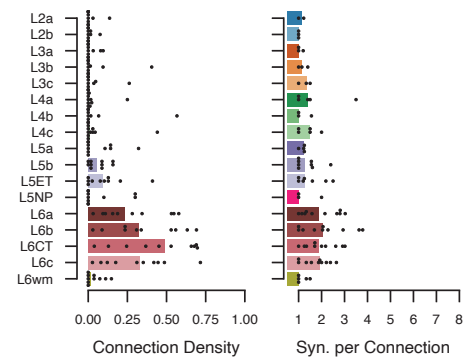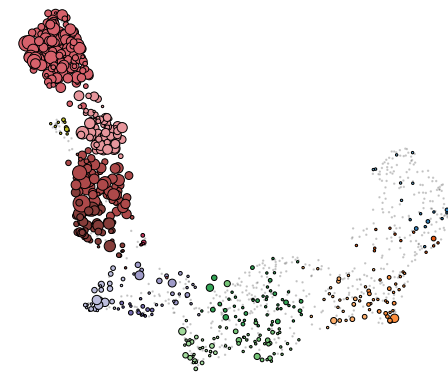

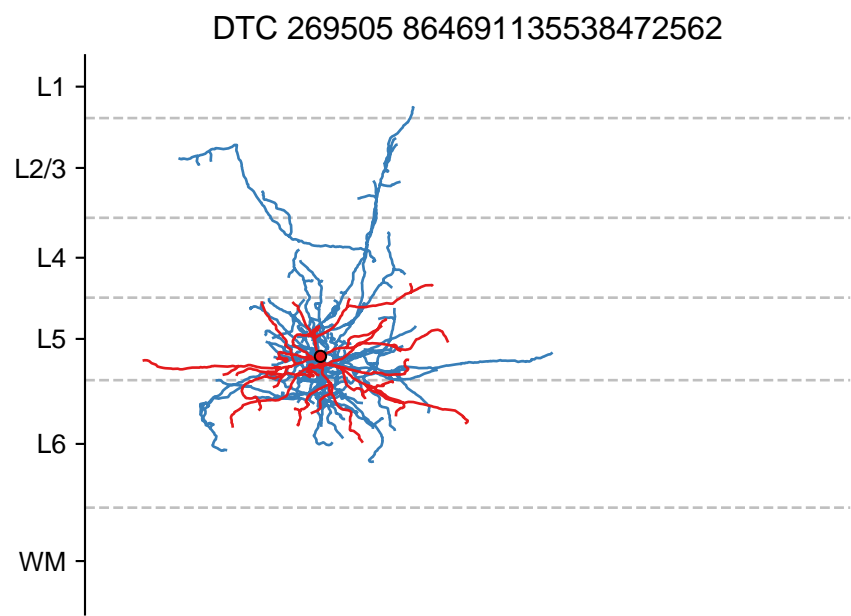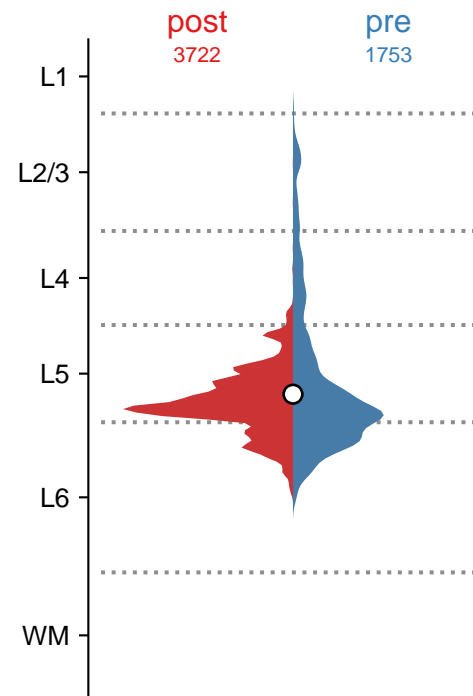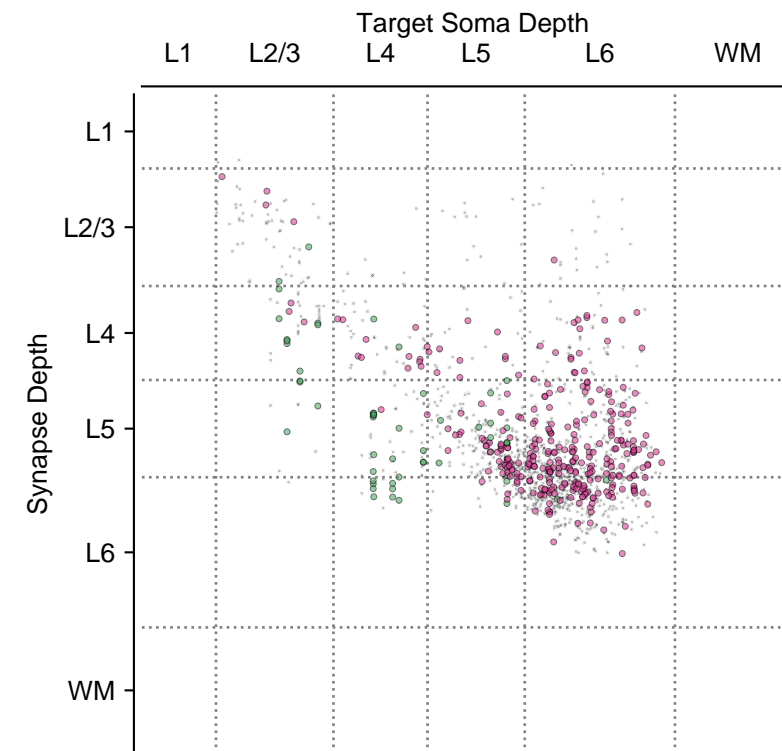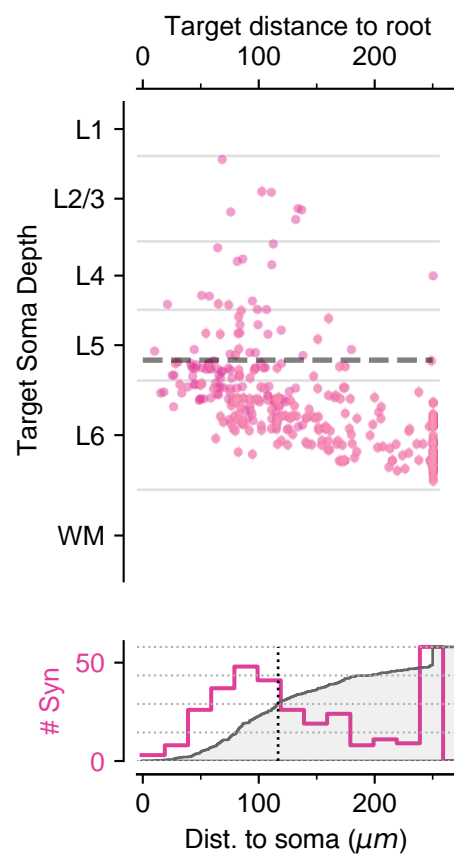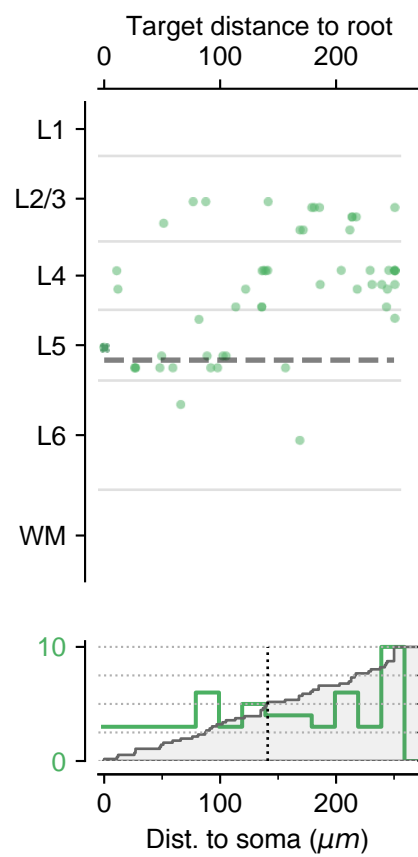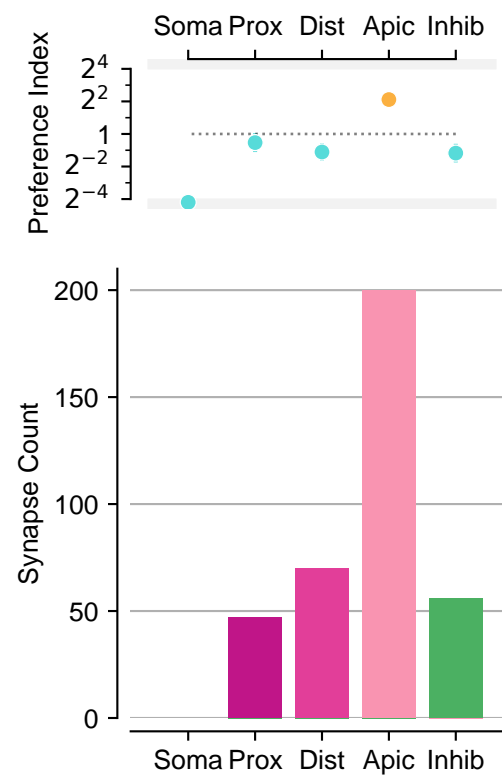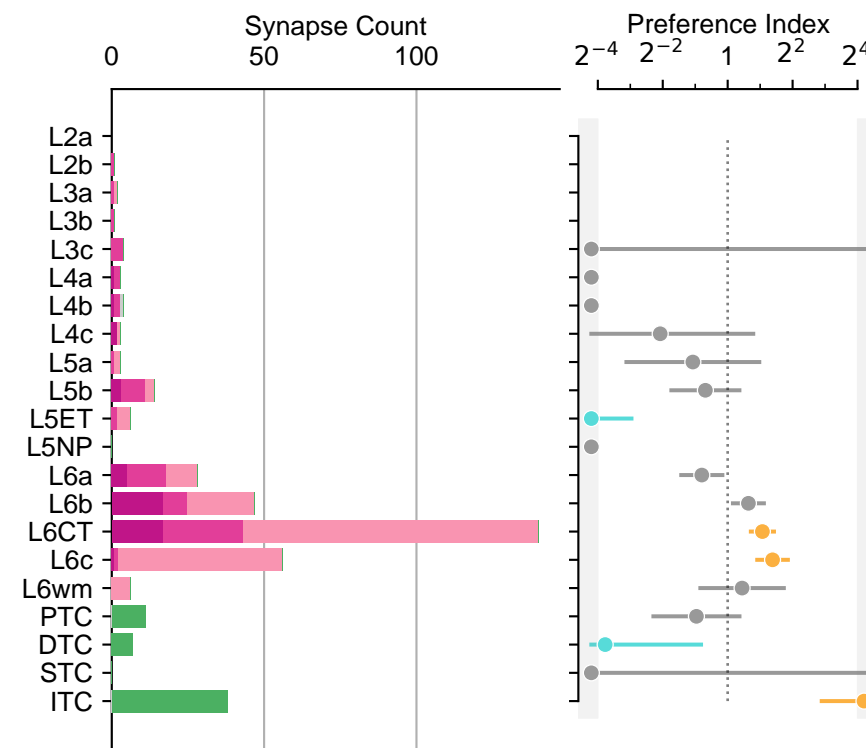

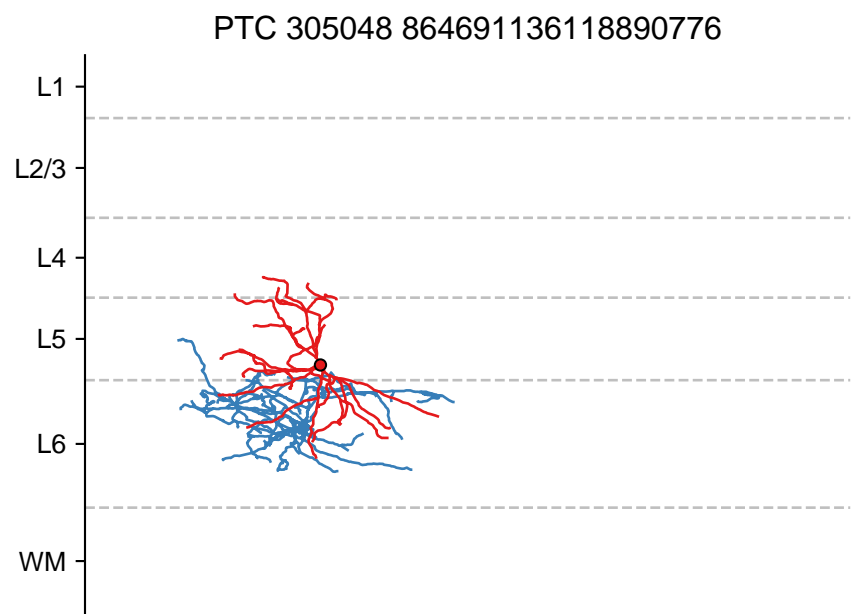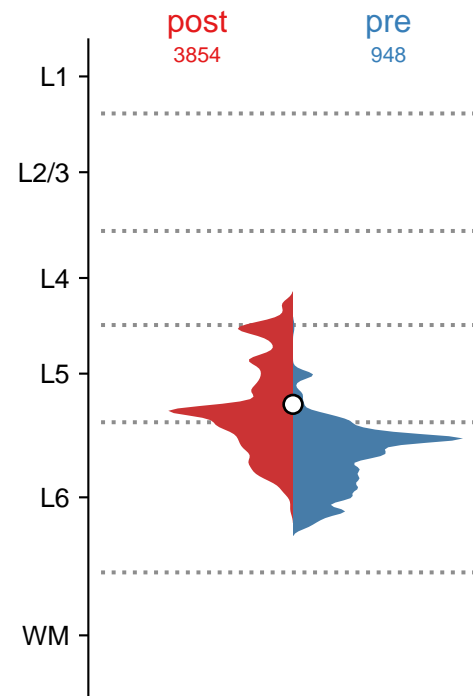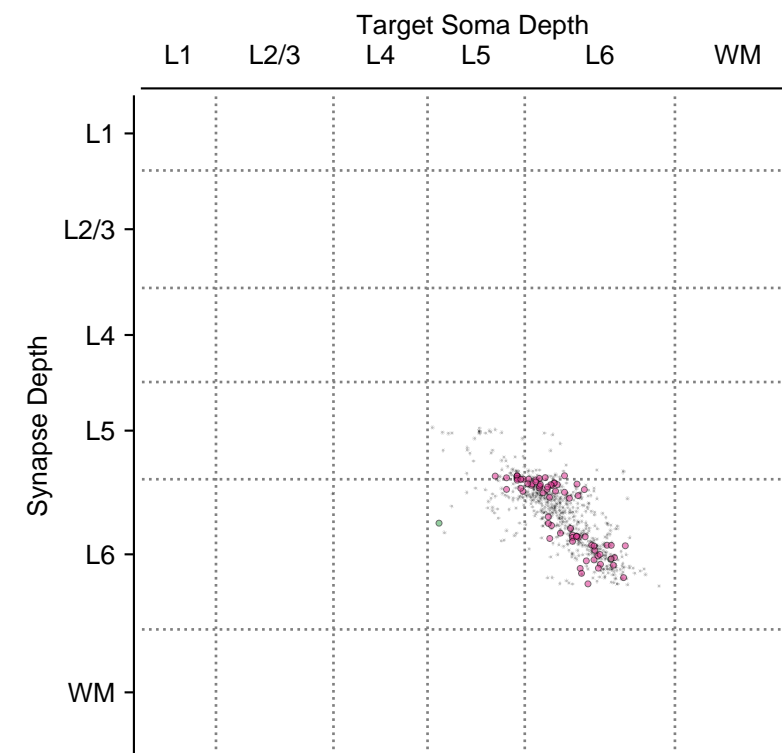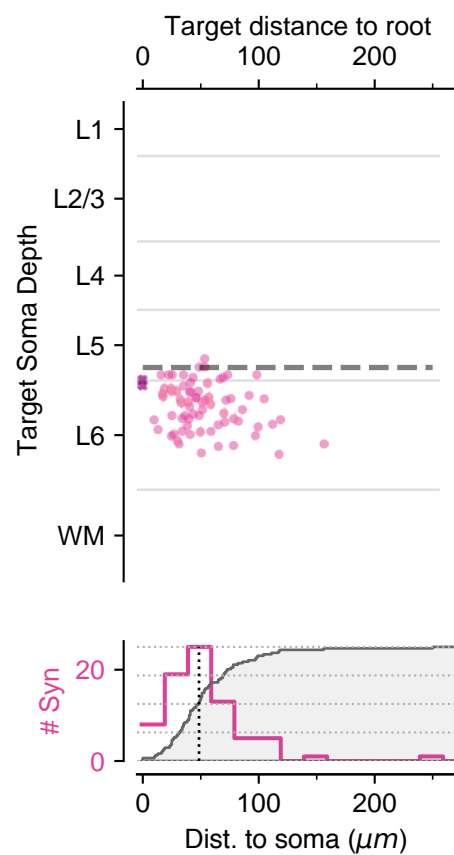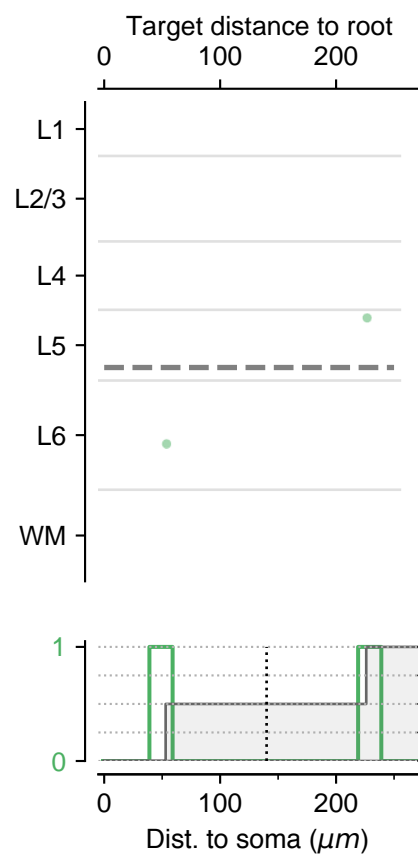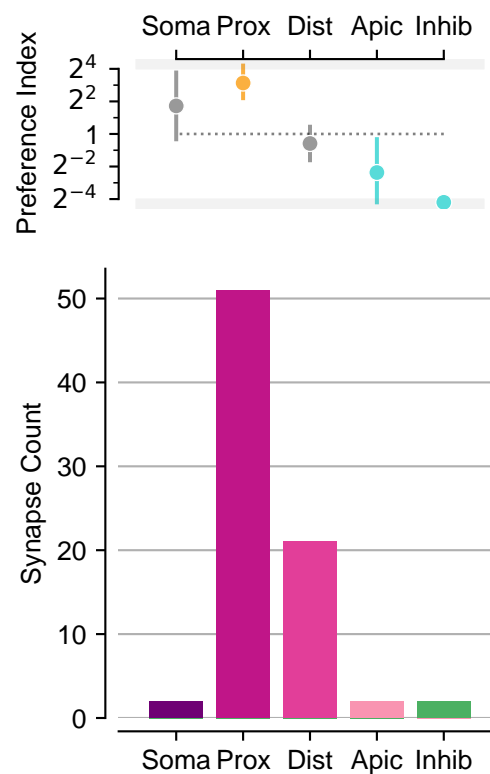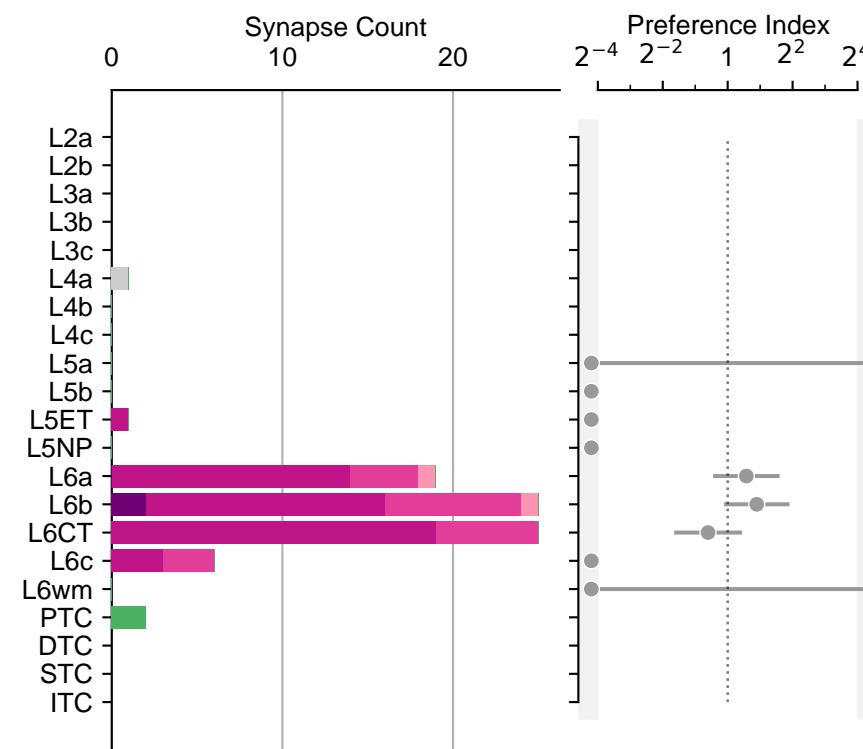

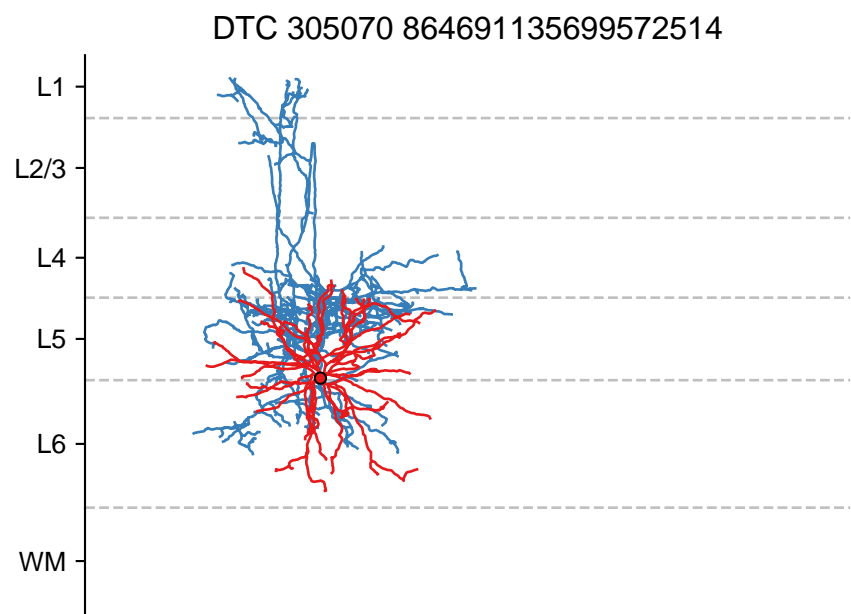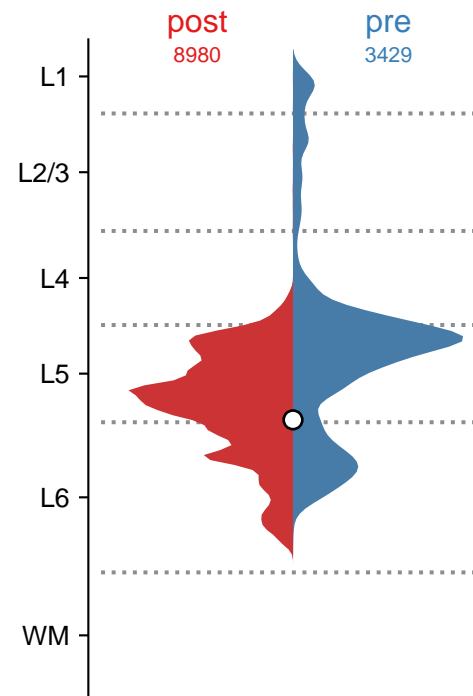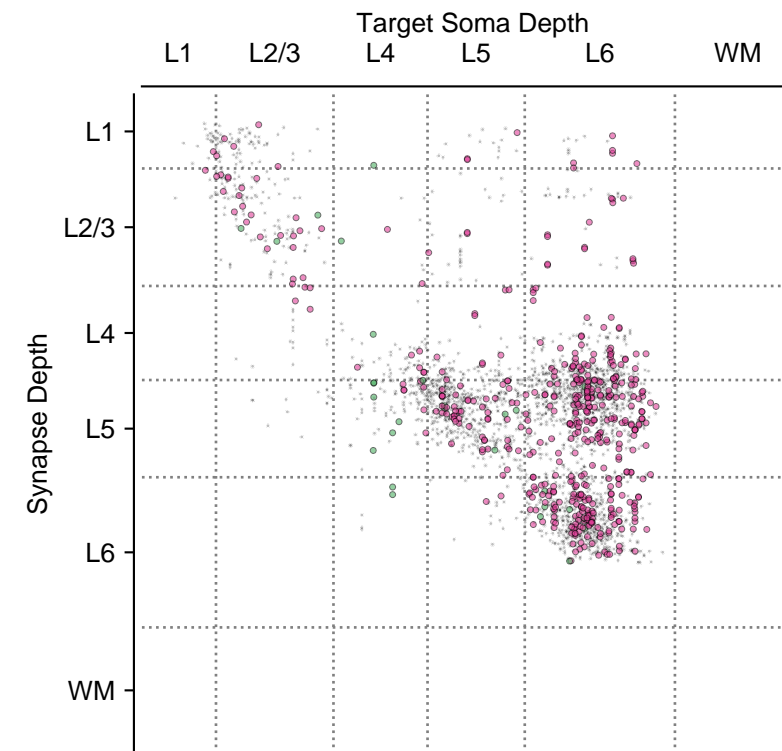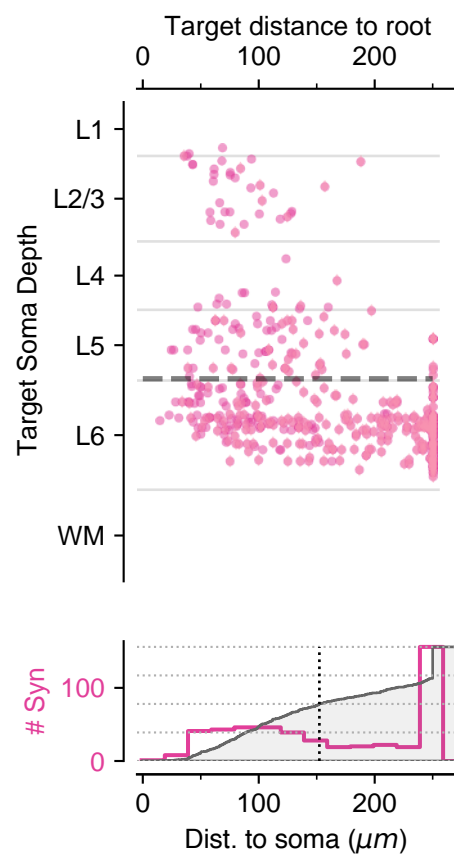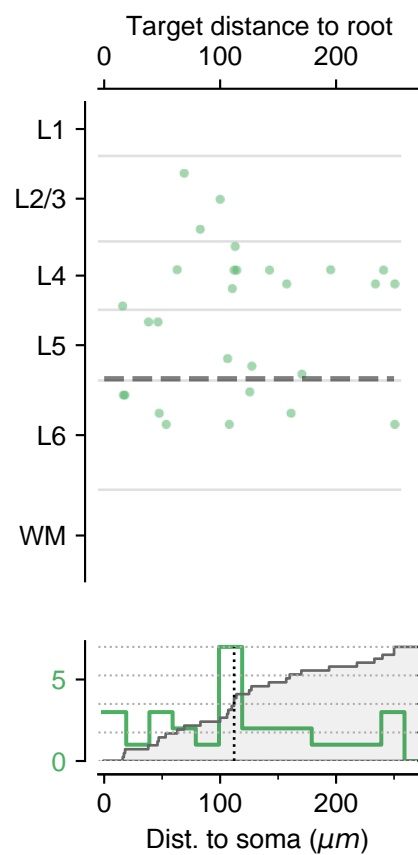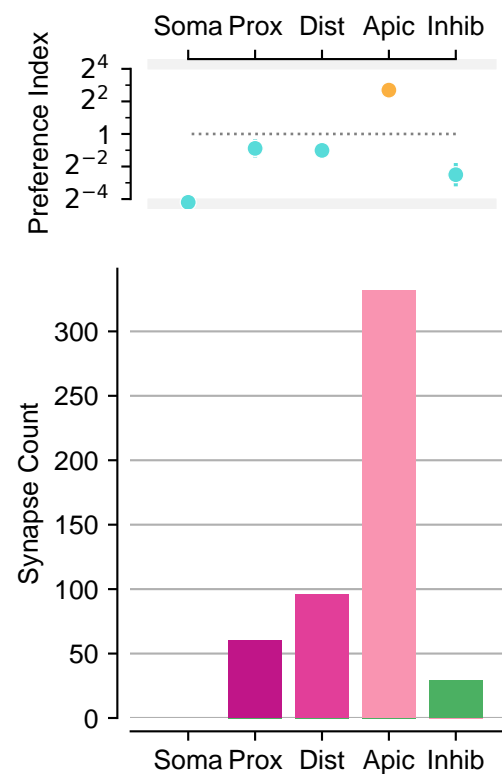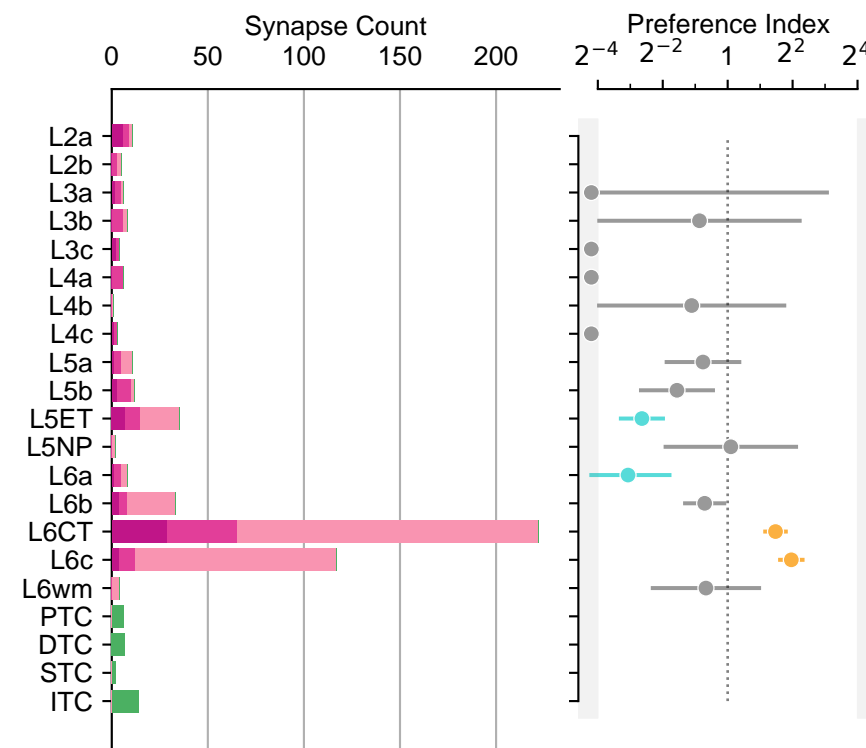

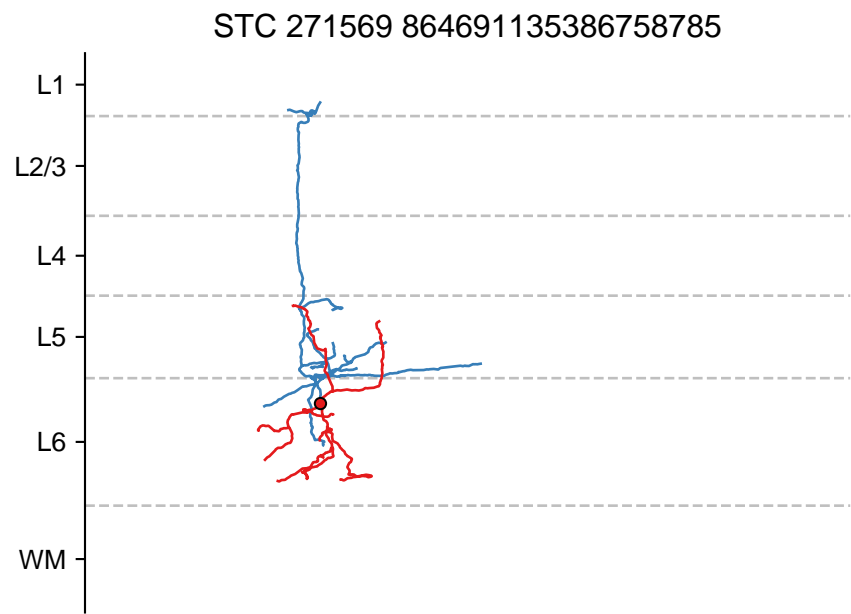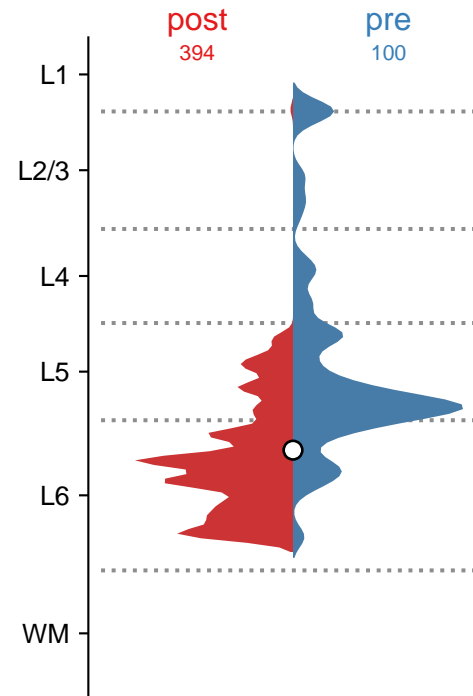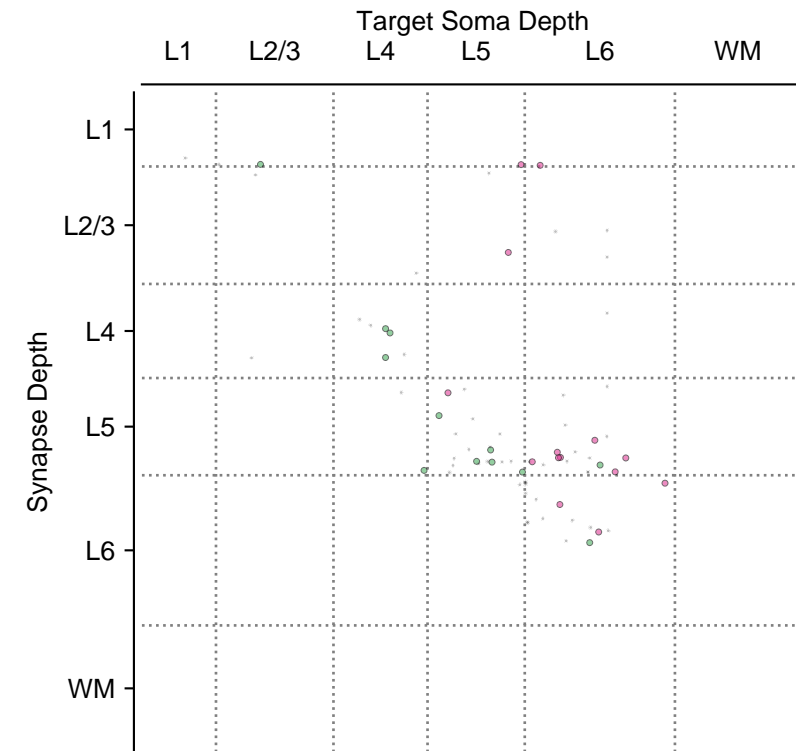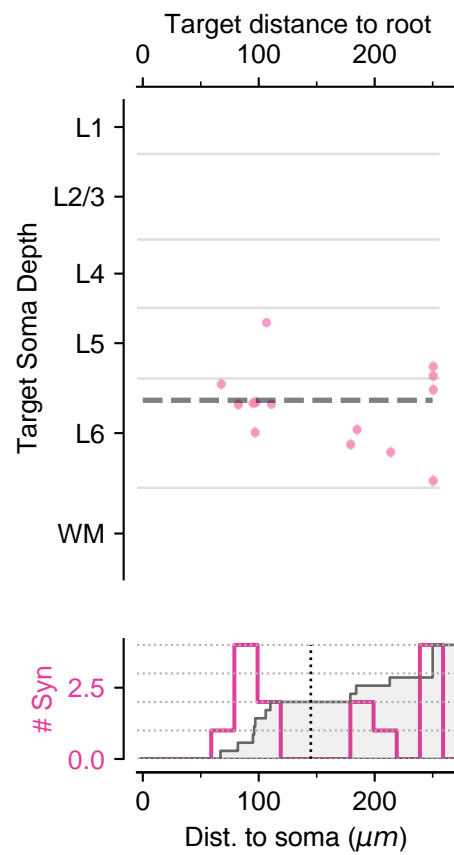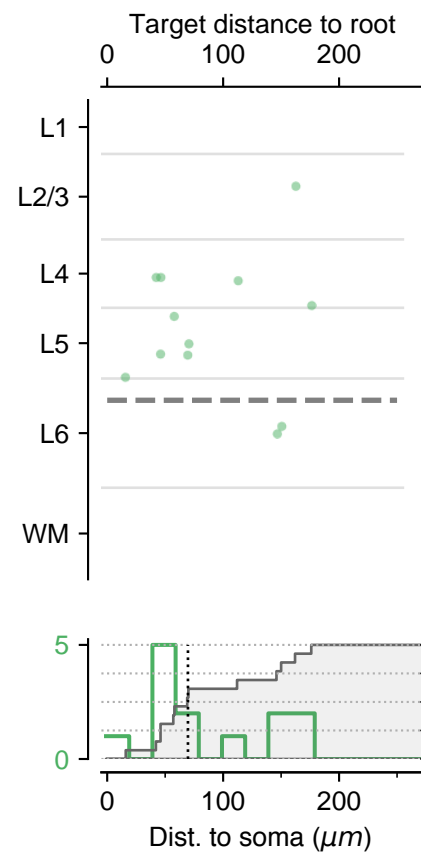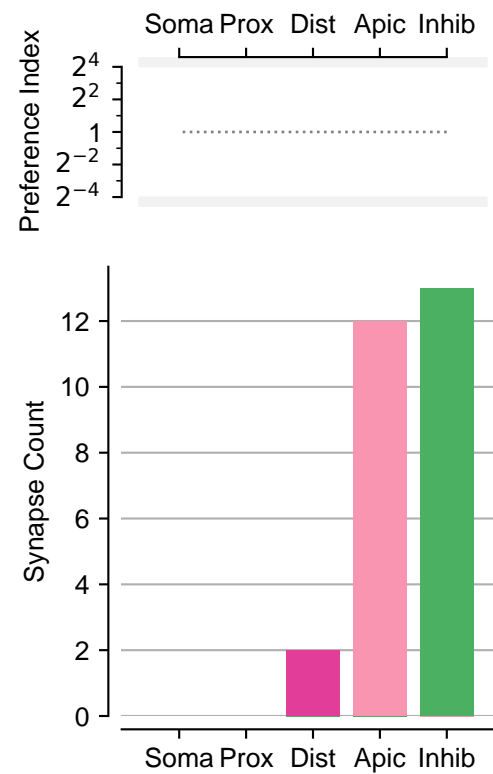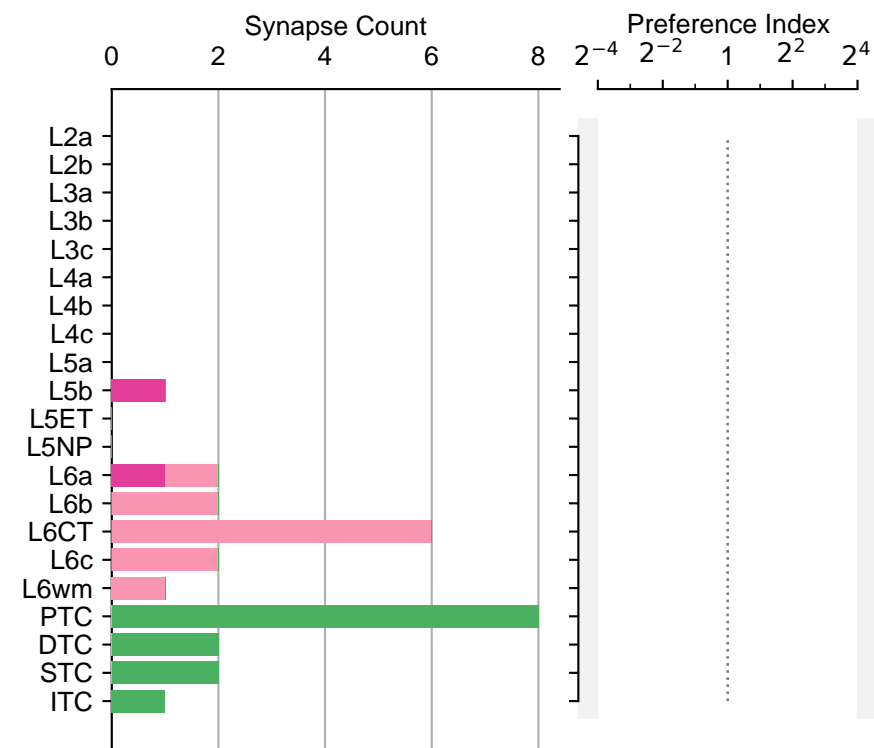

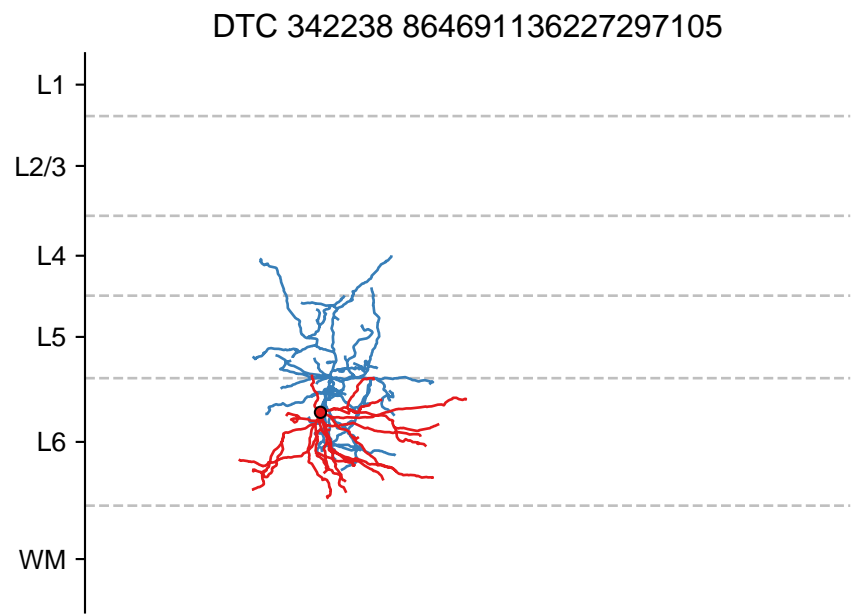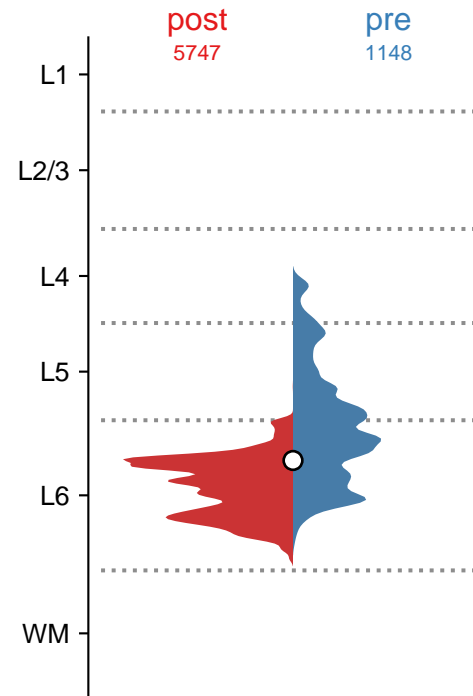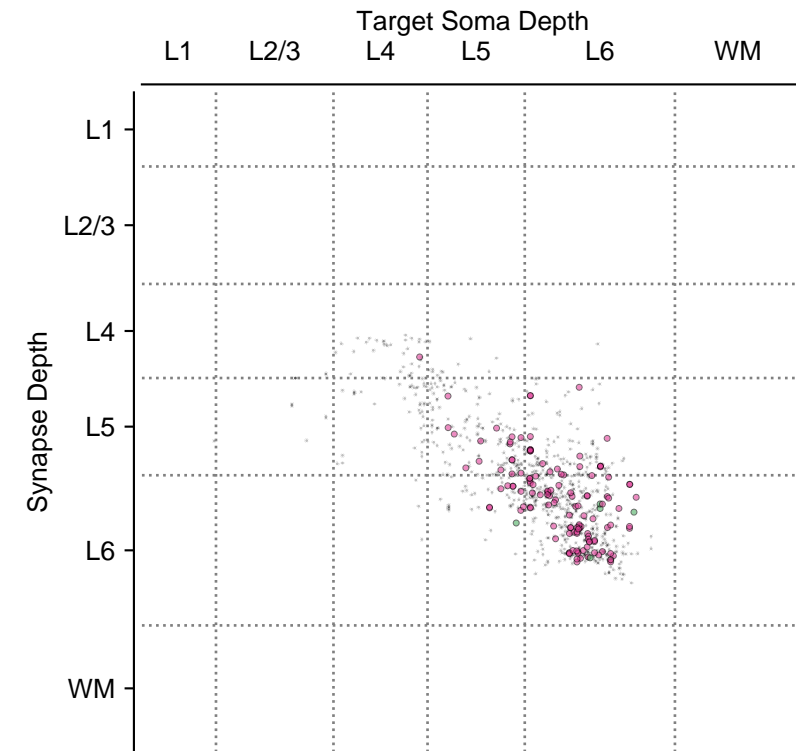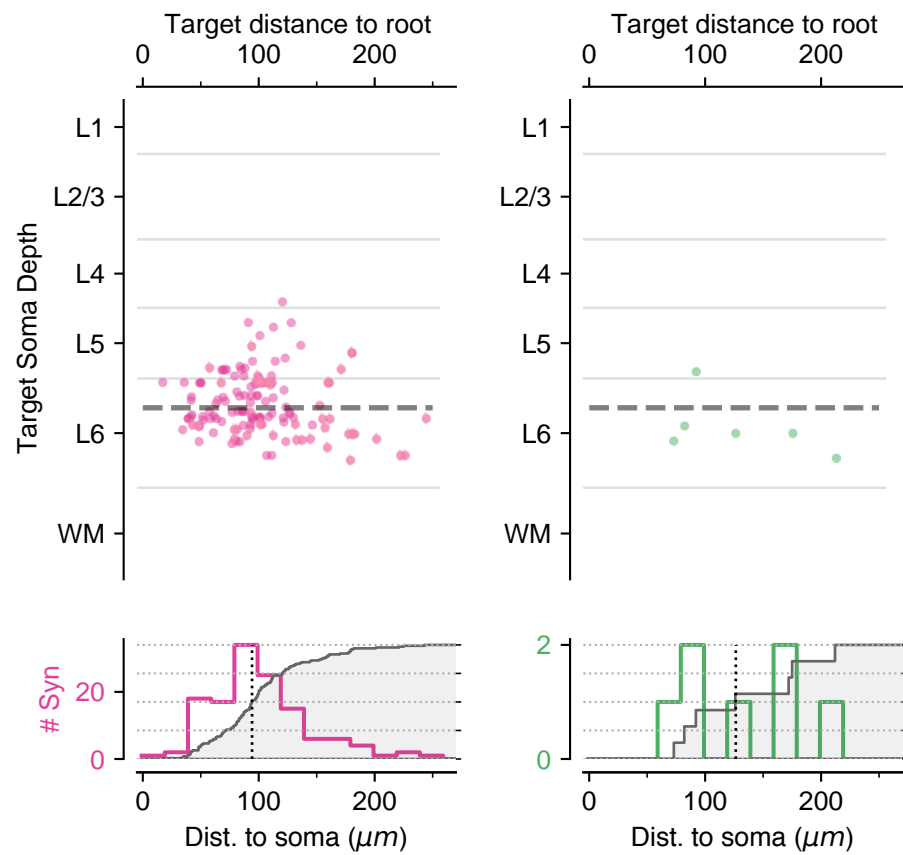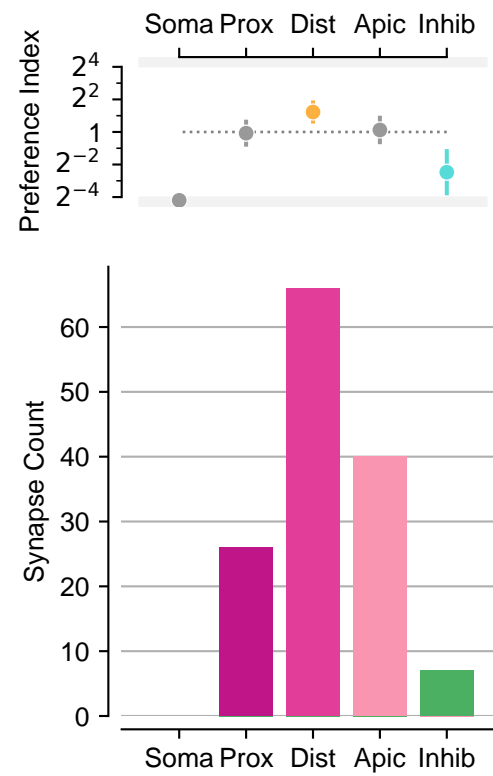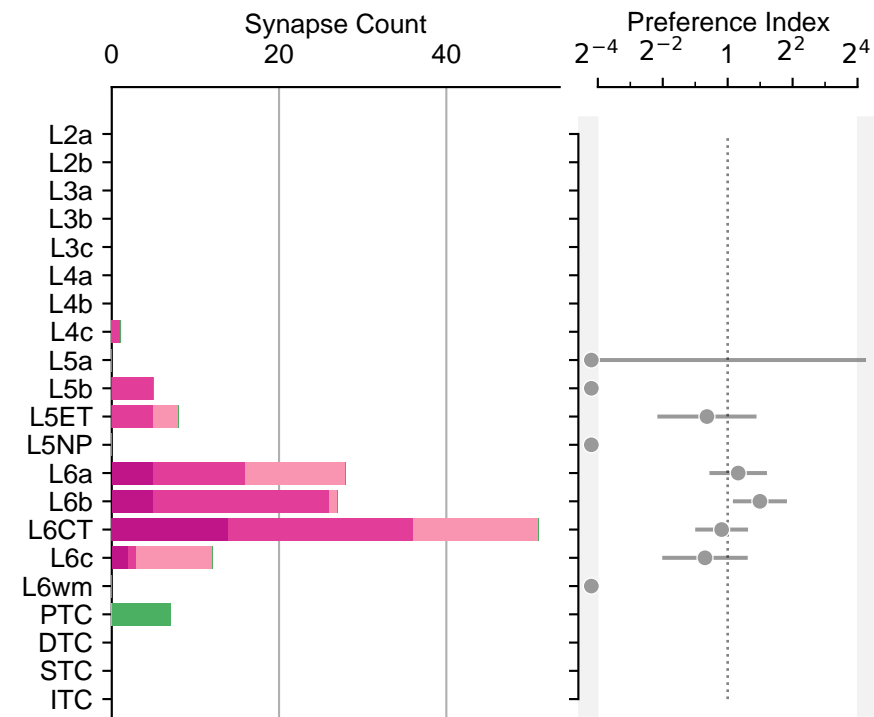

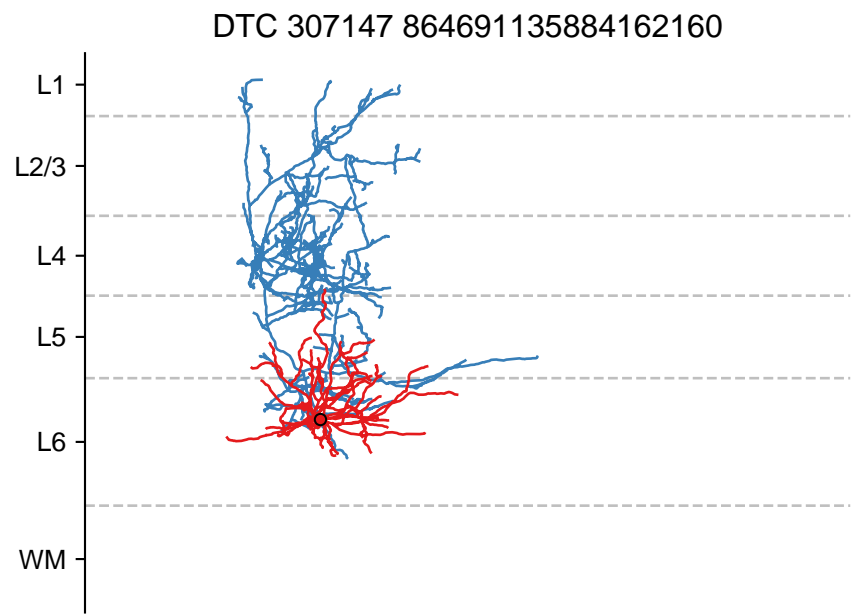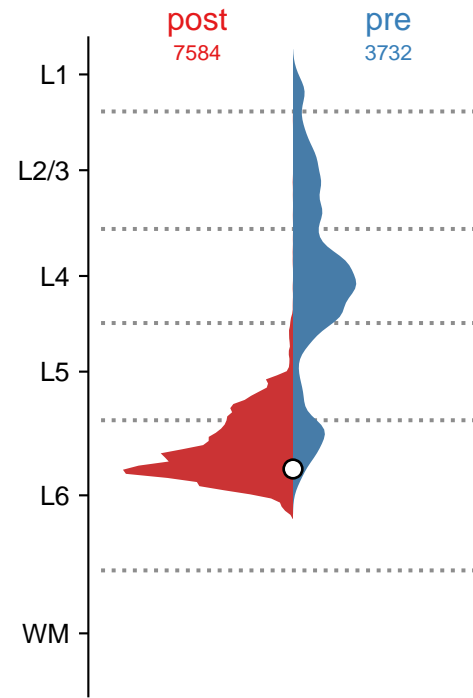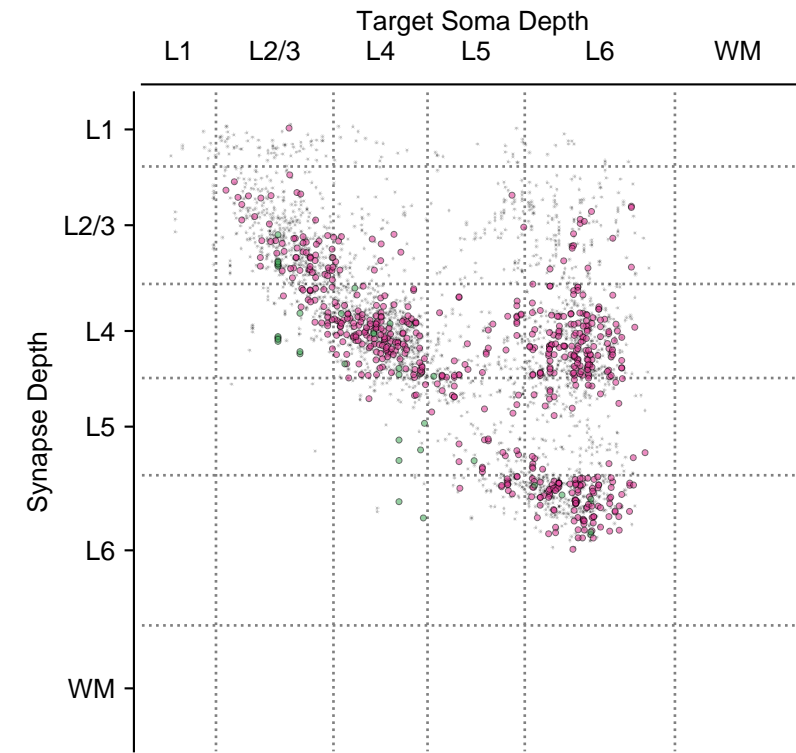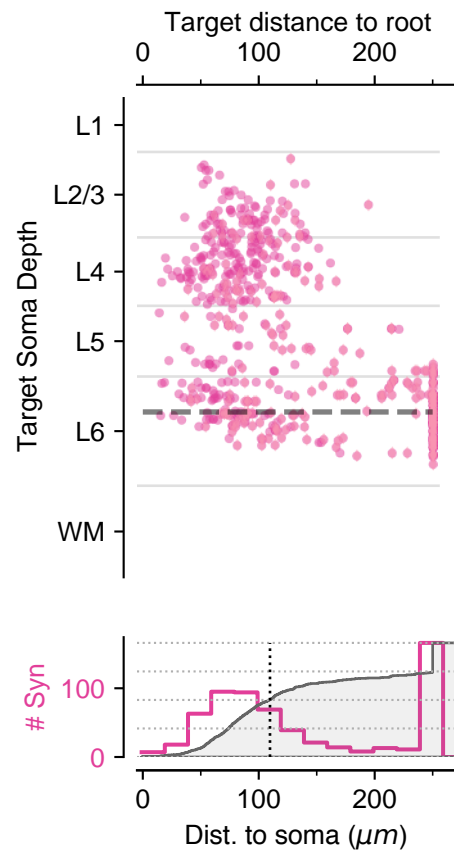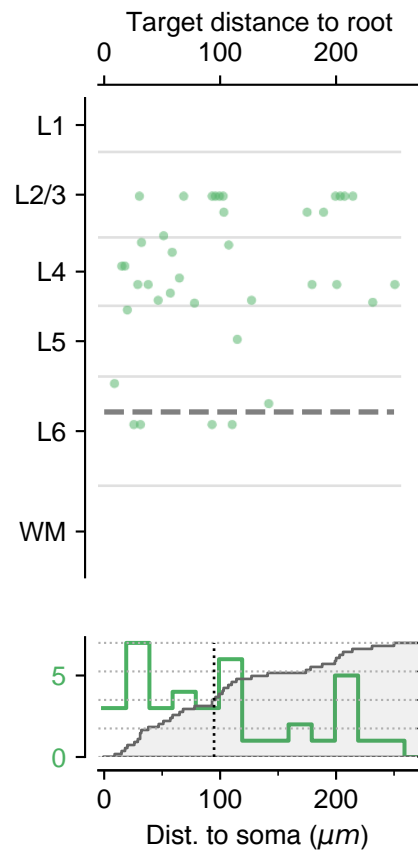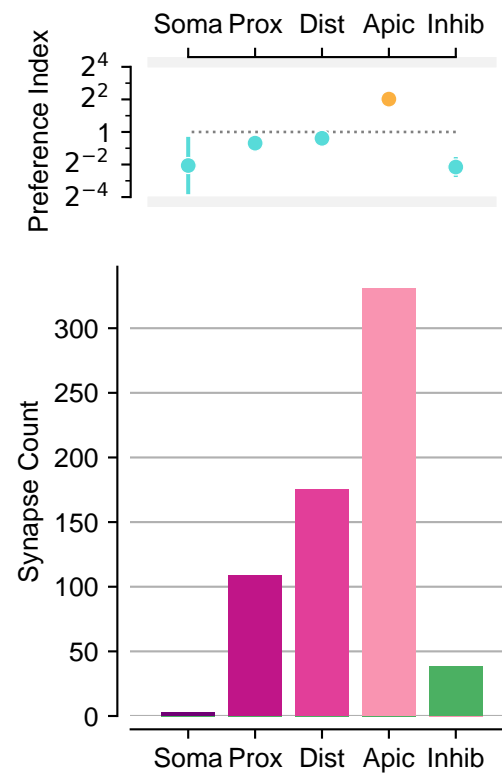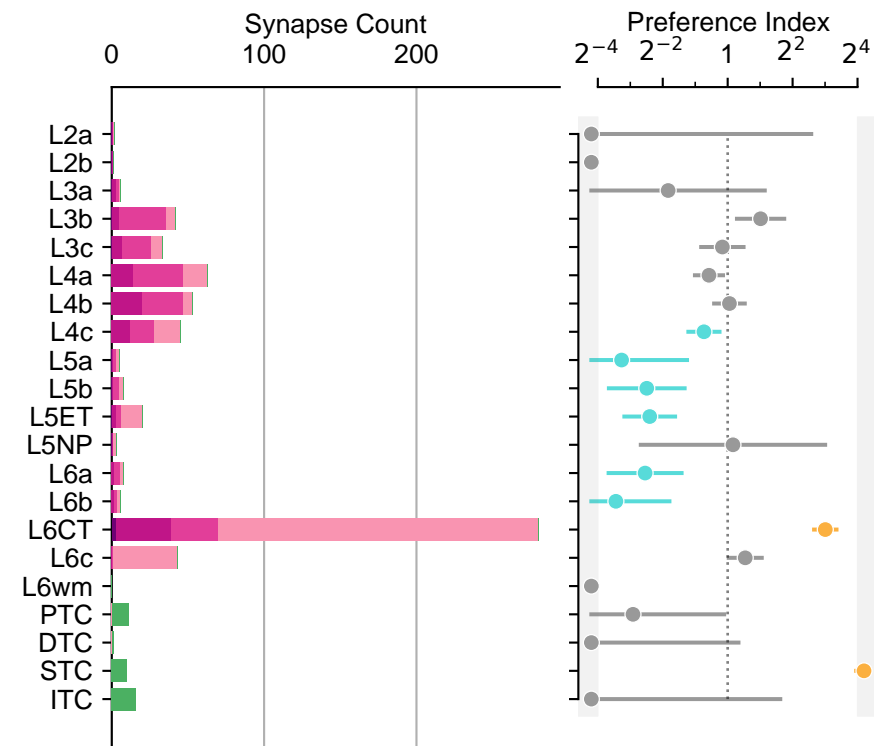



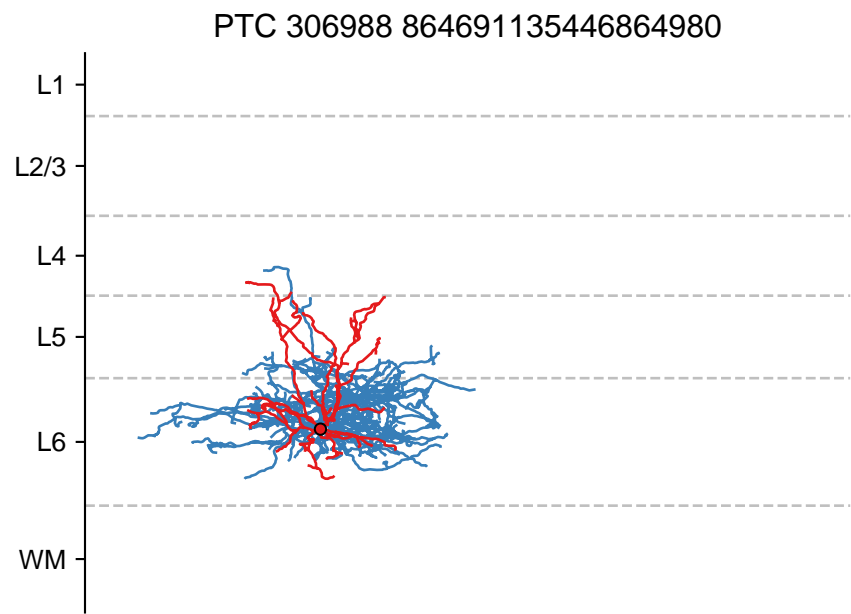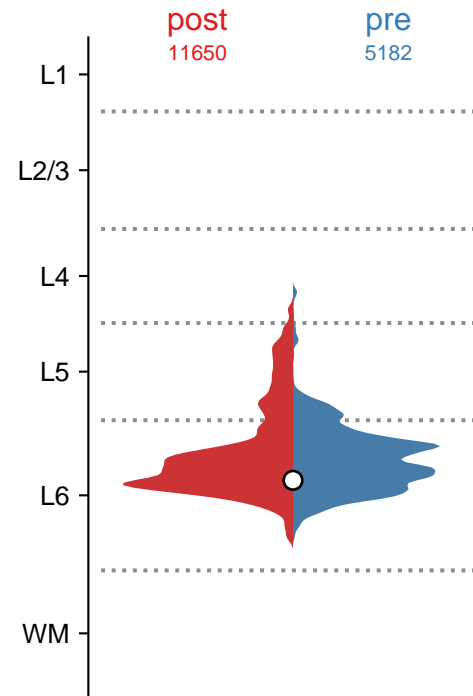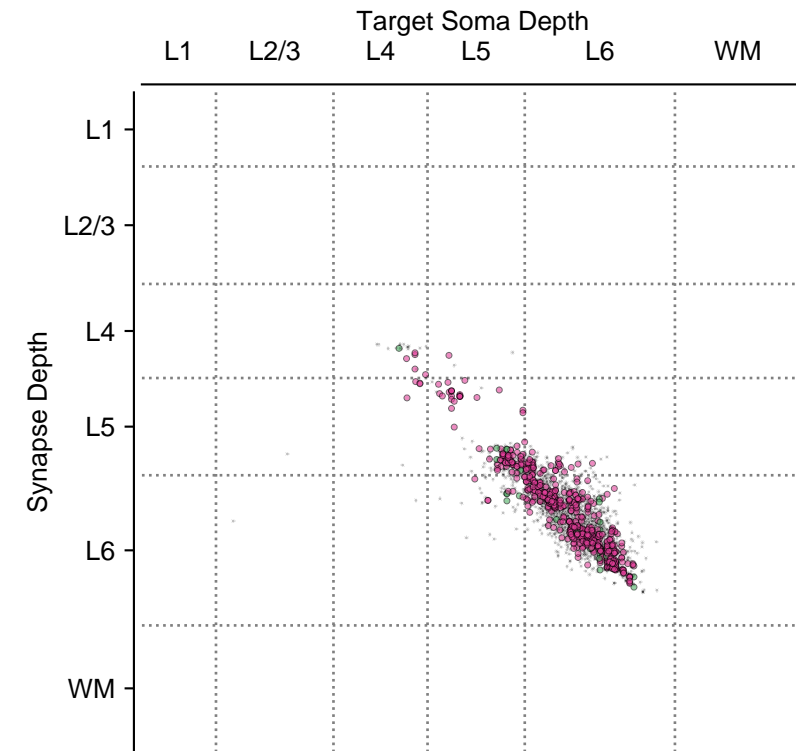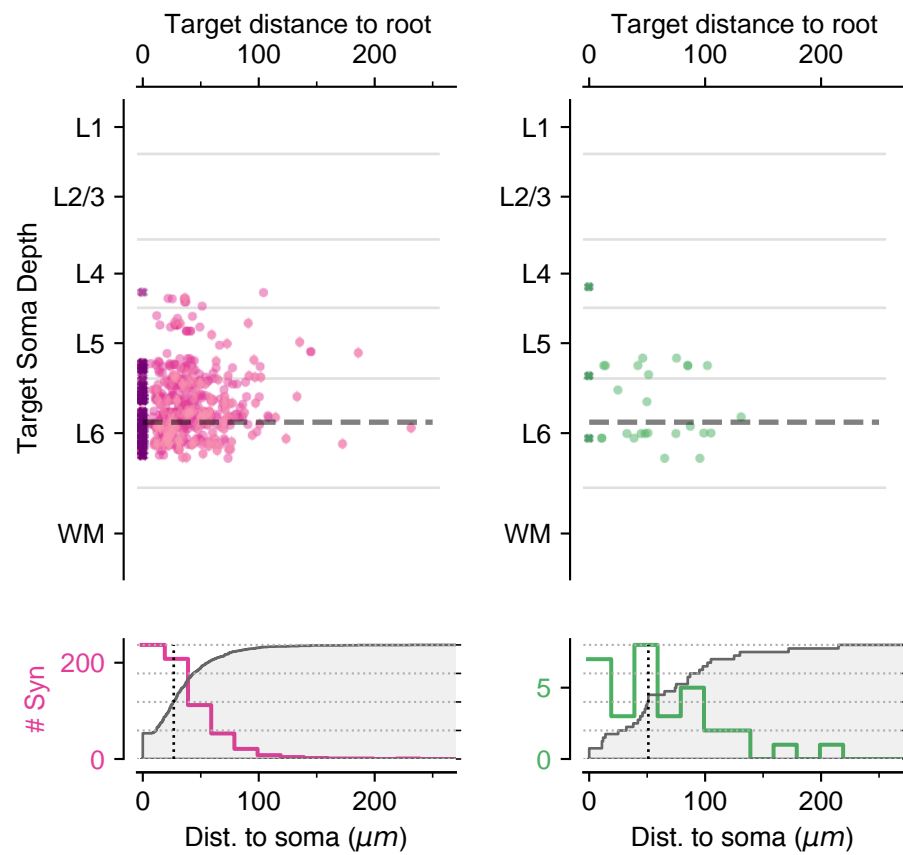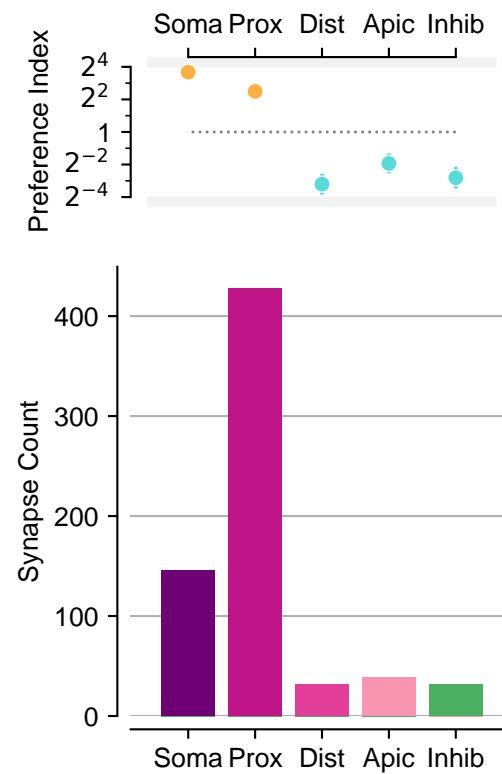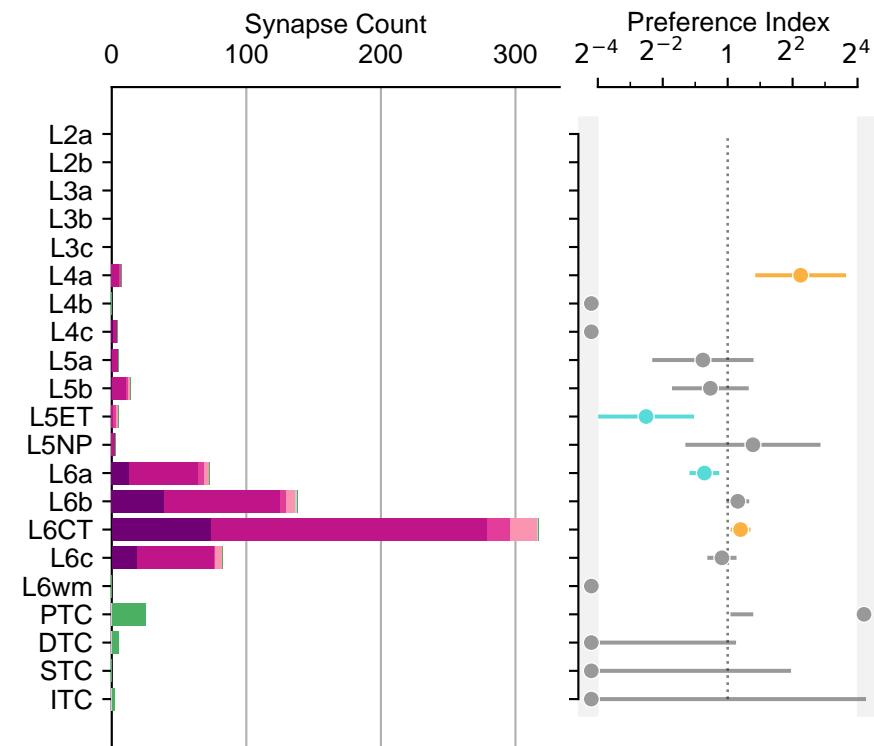

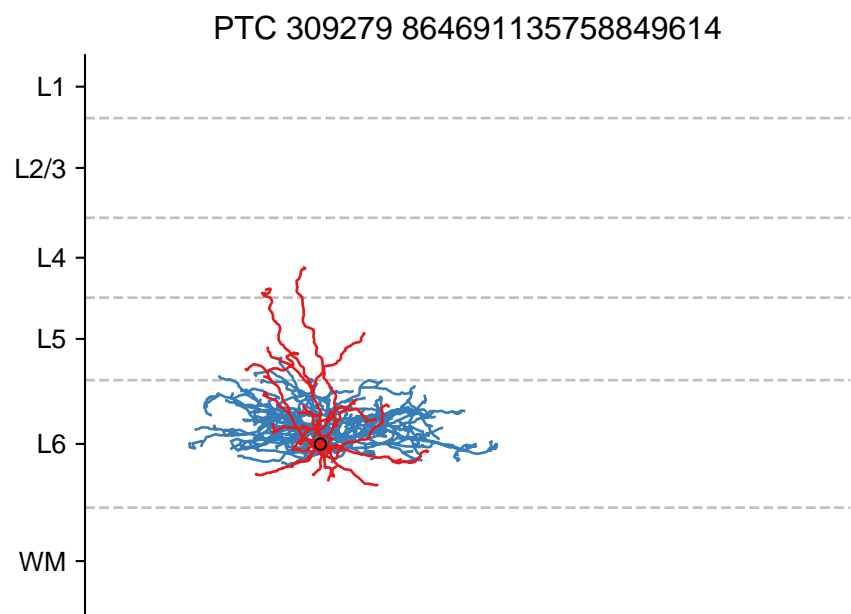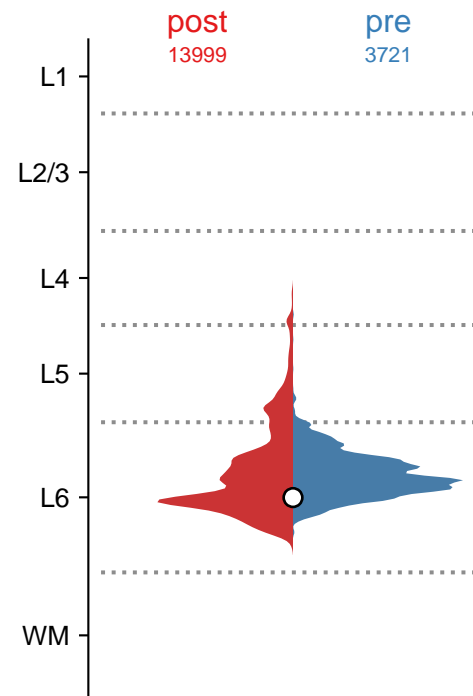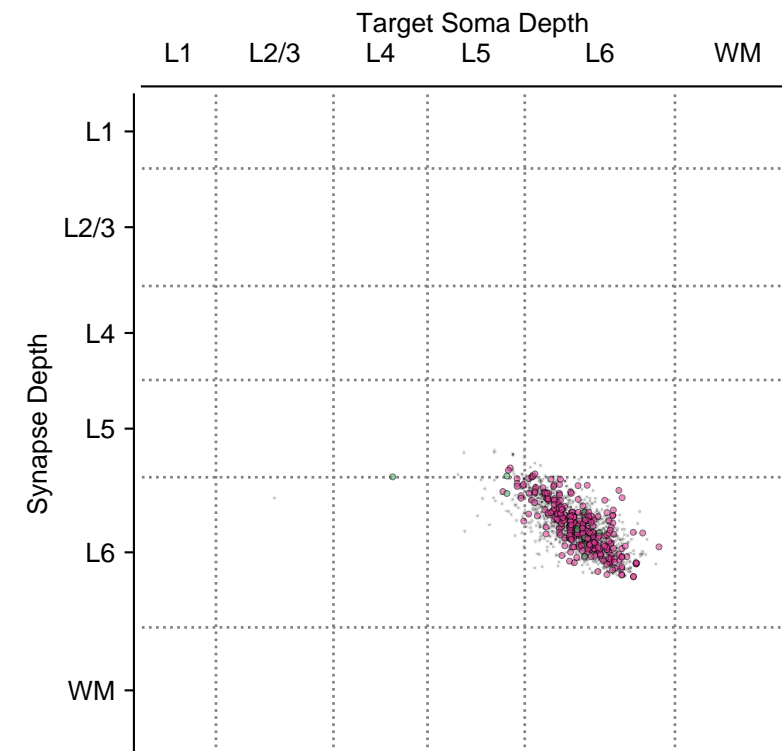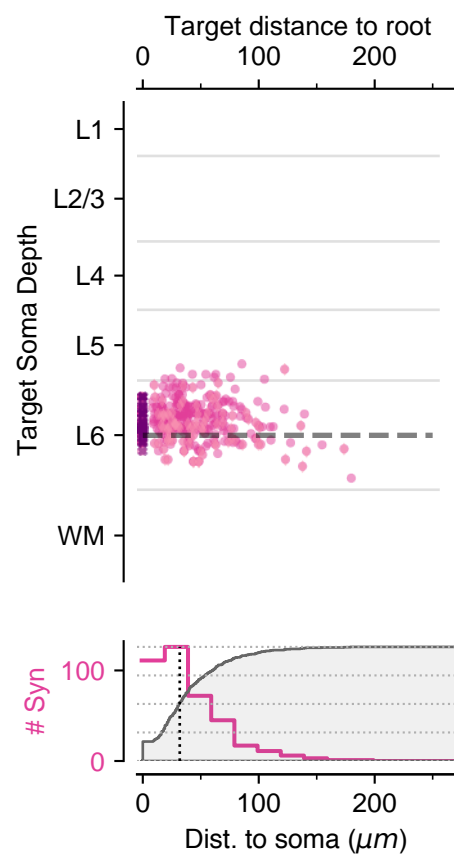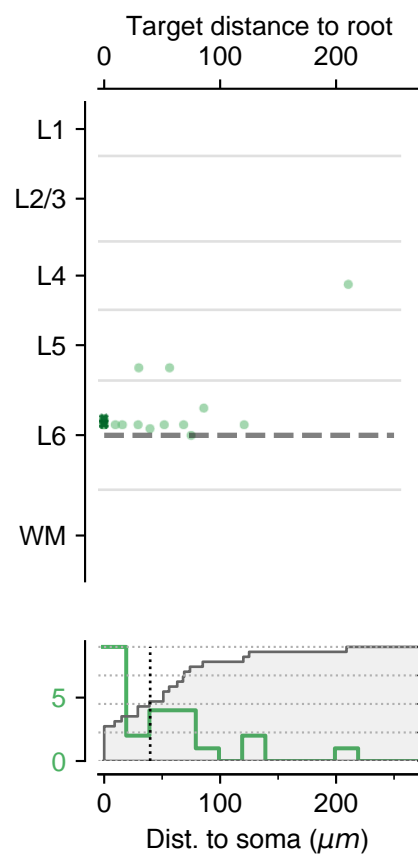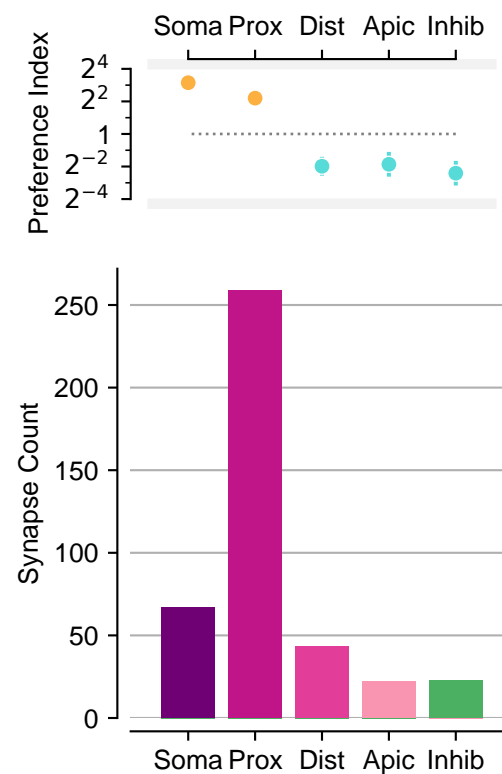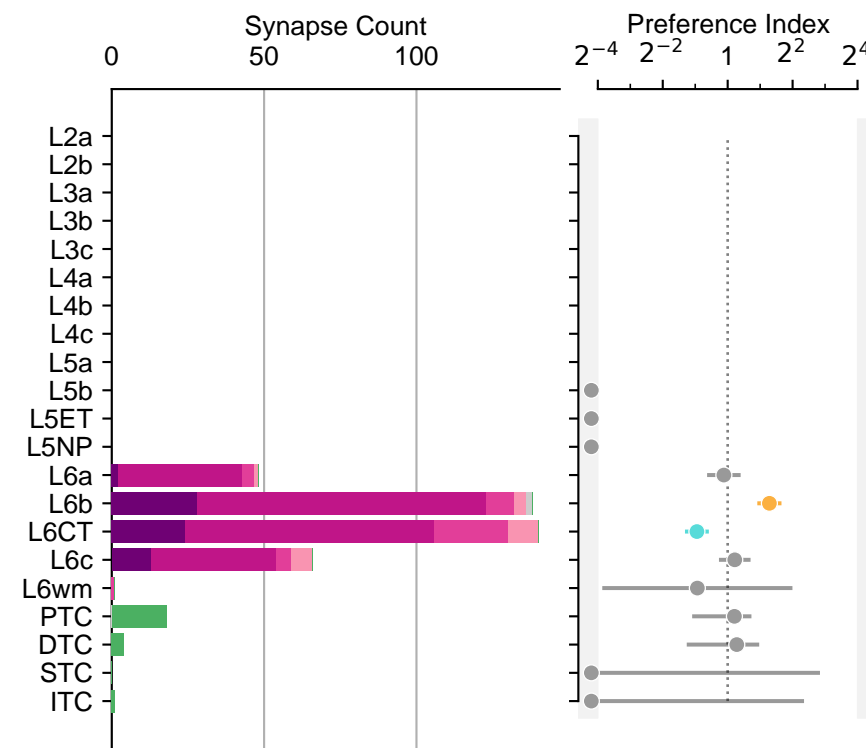

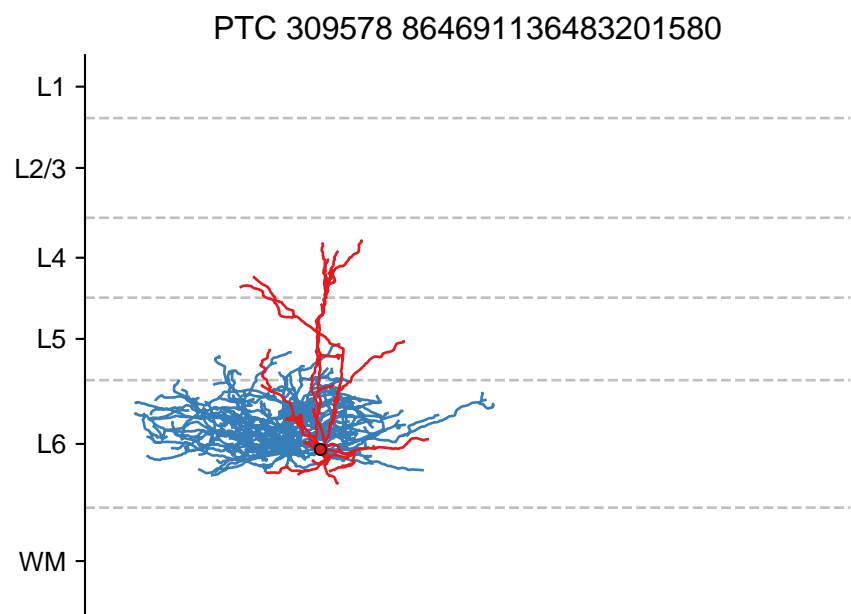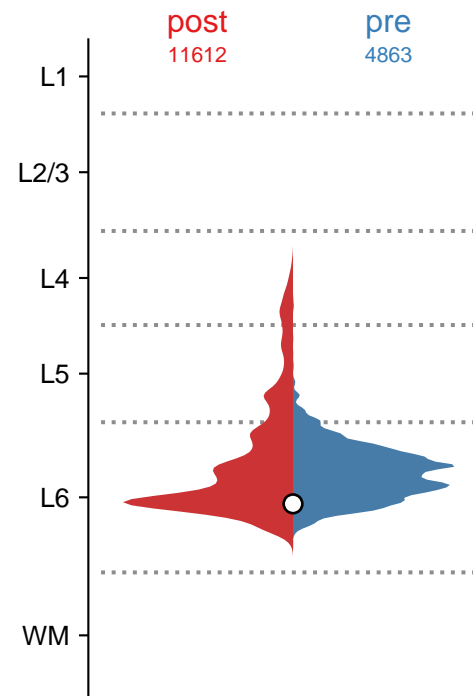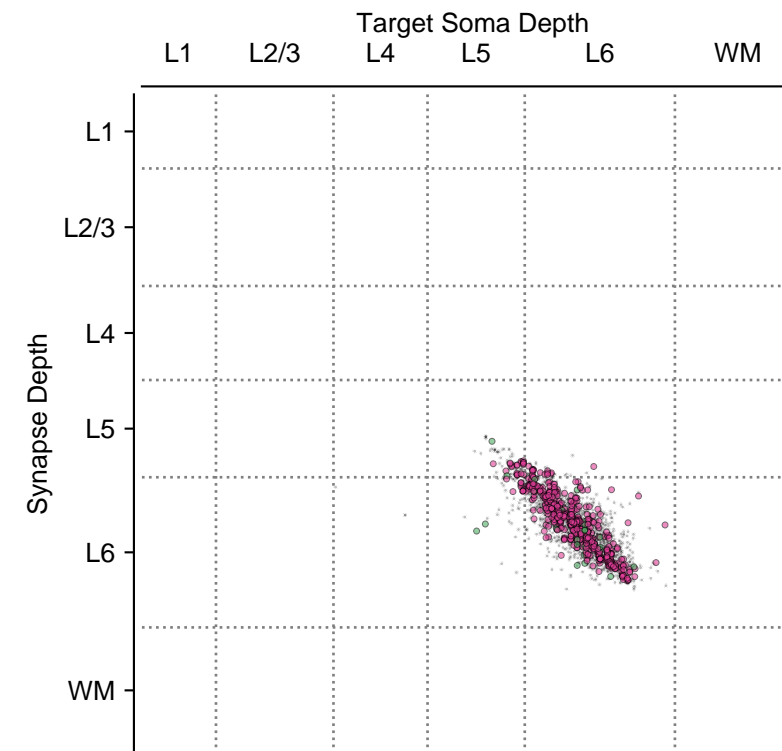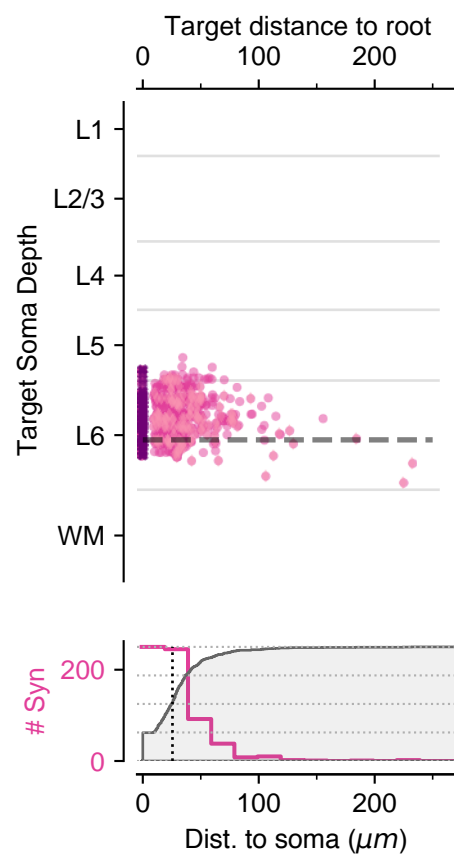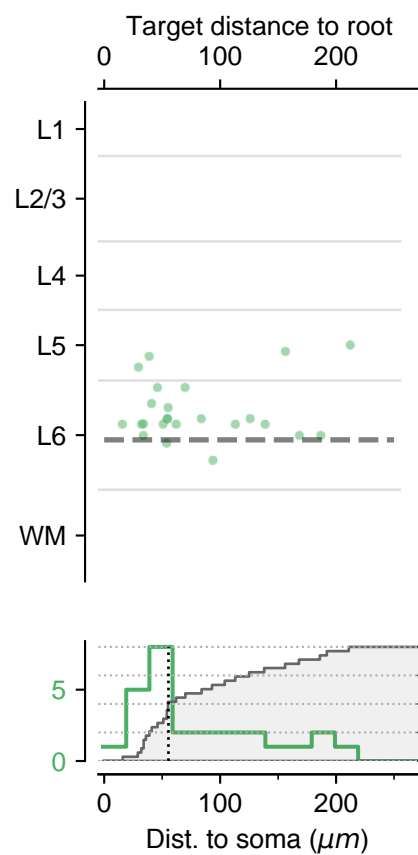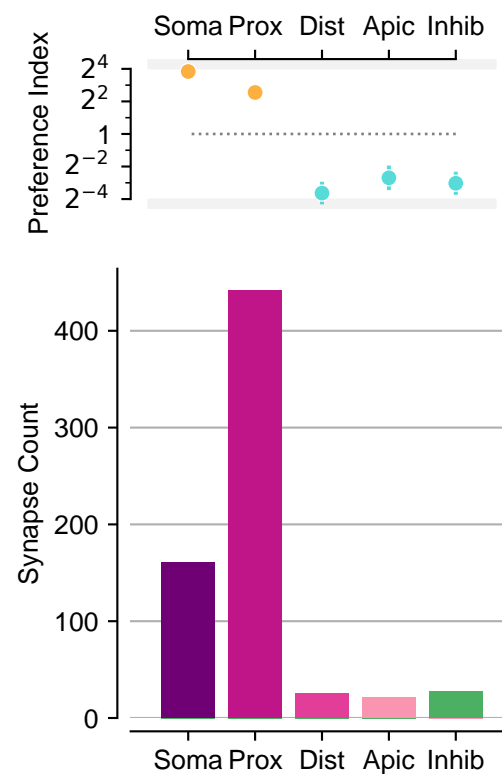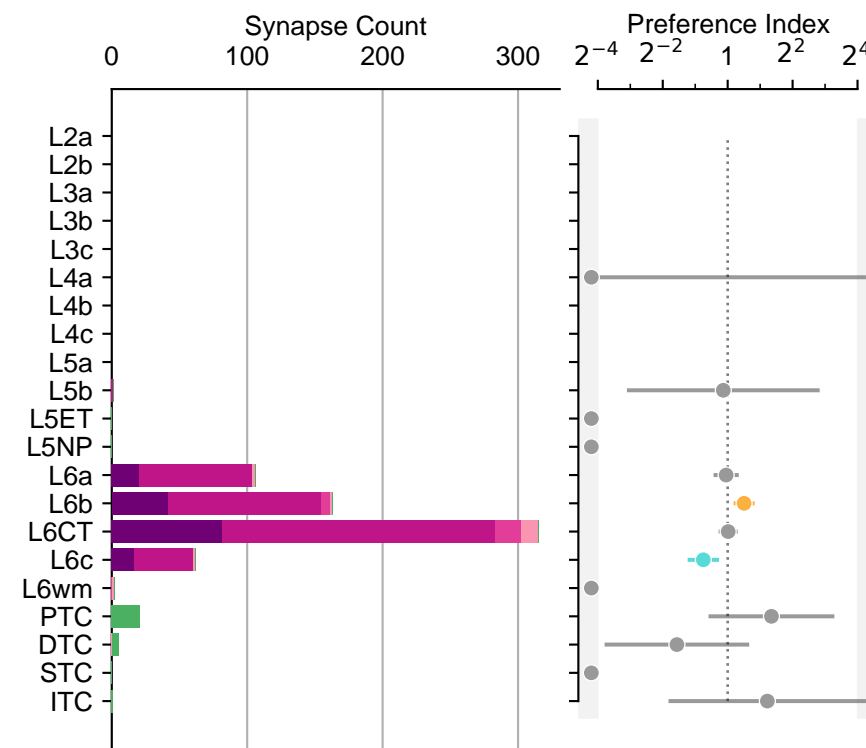

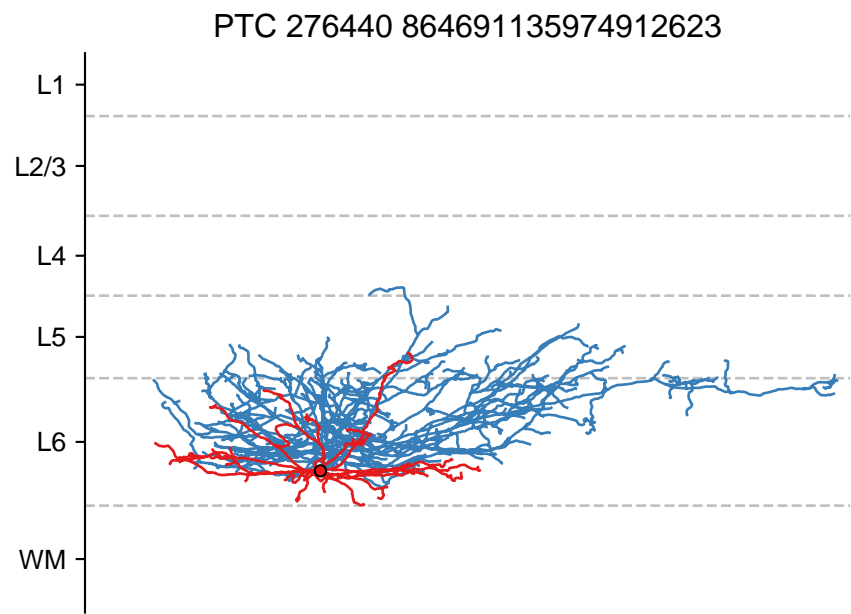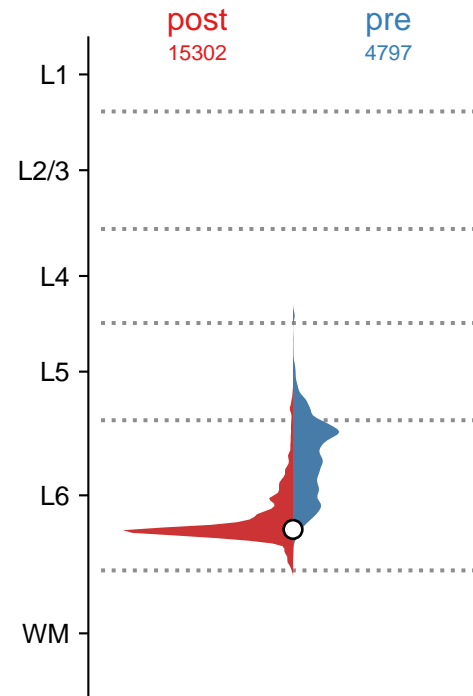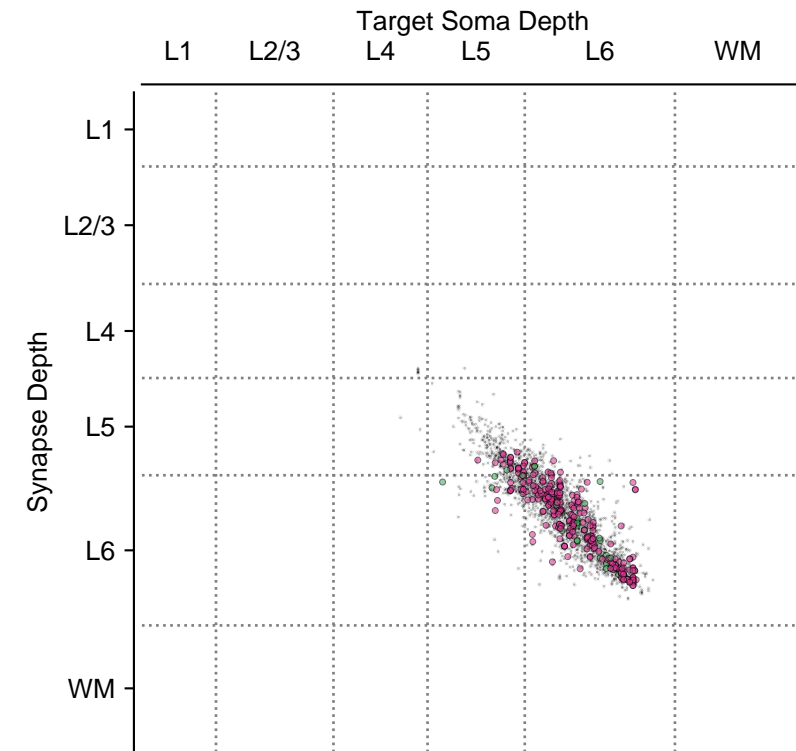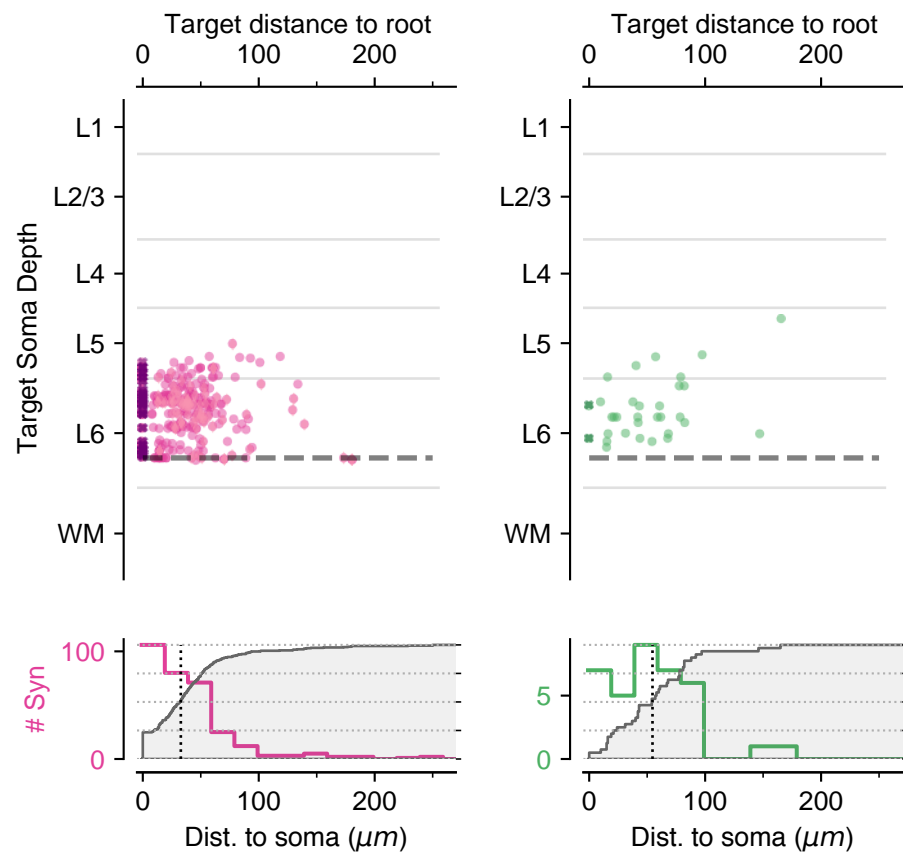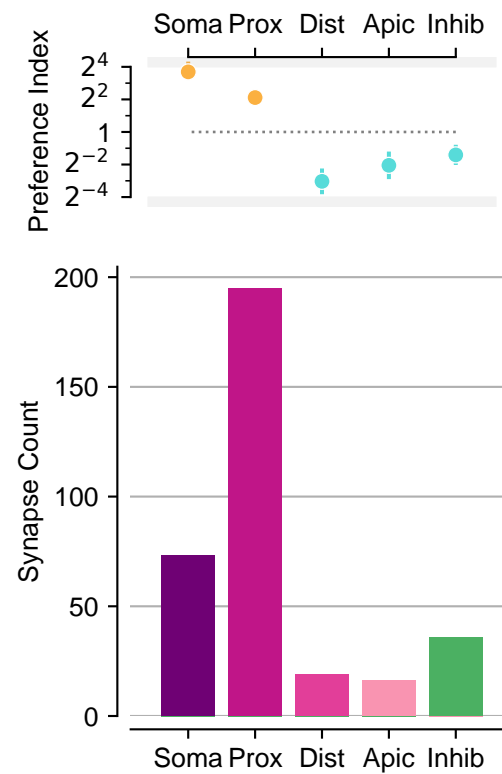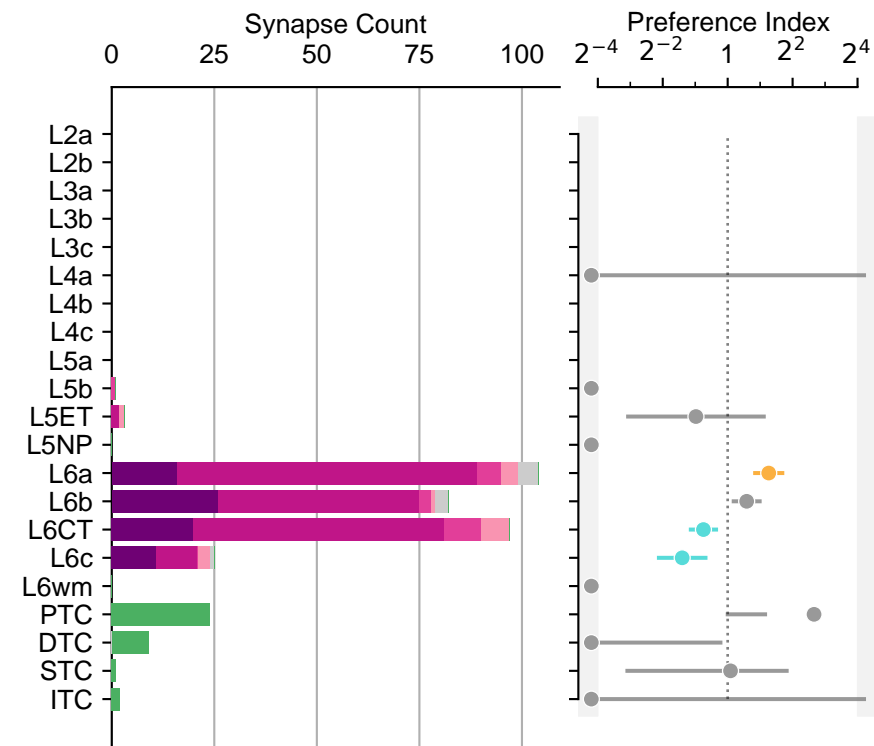

# Group 15

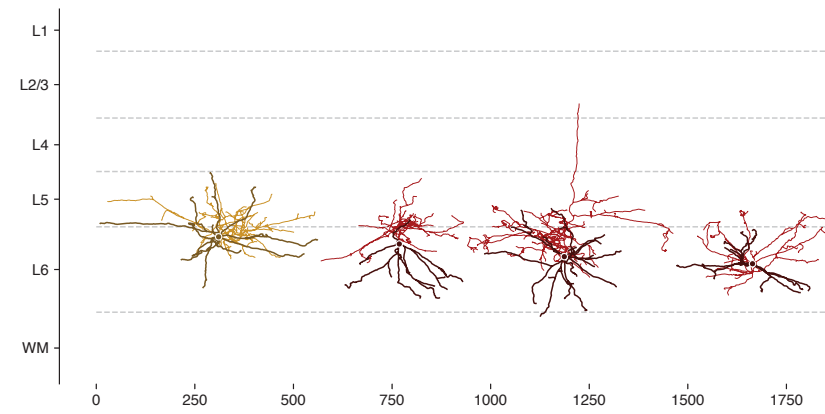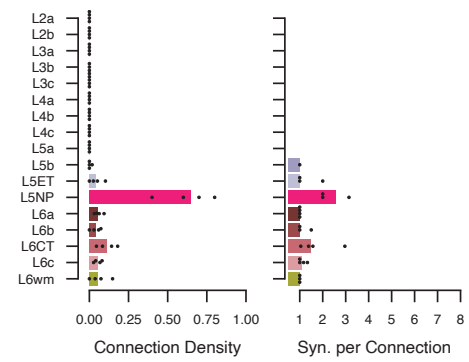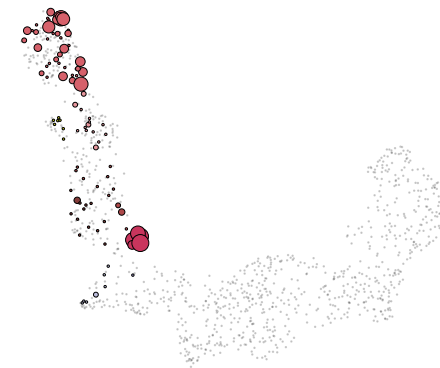

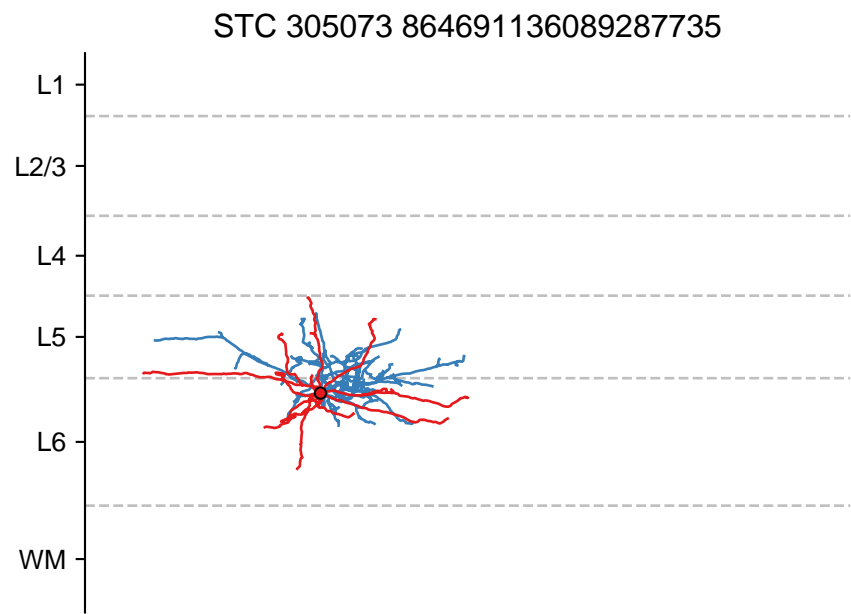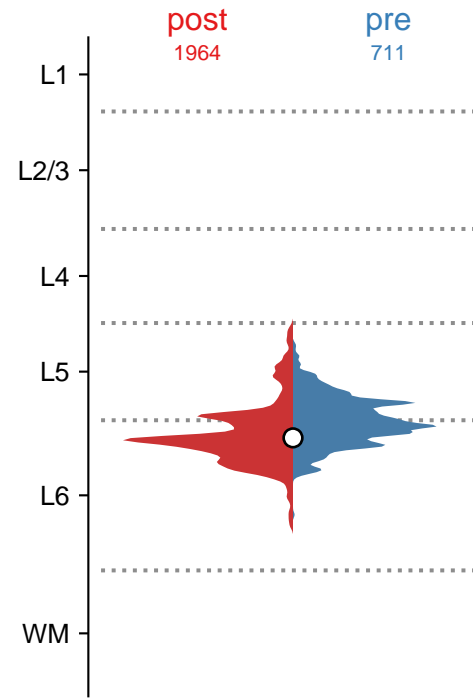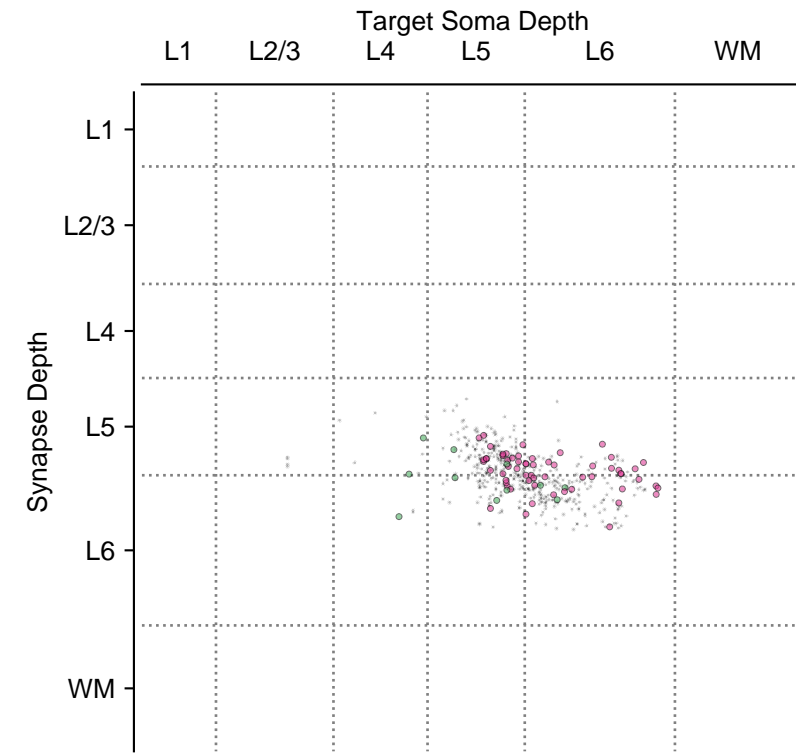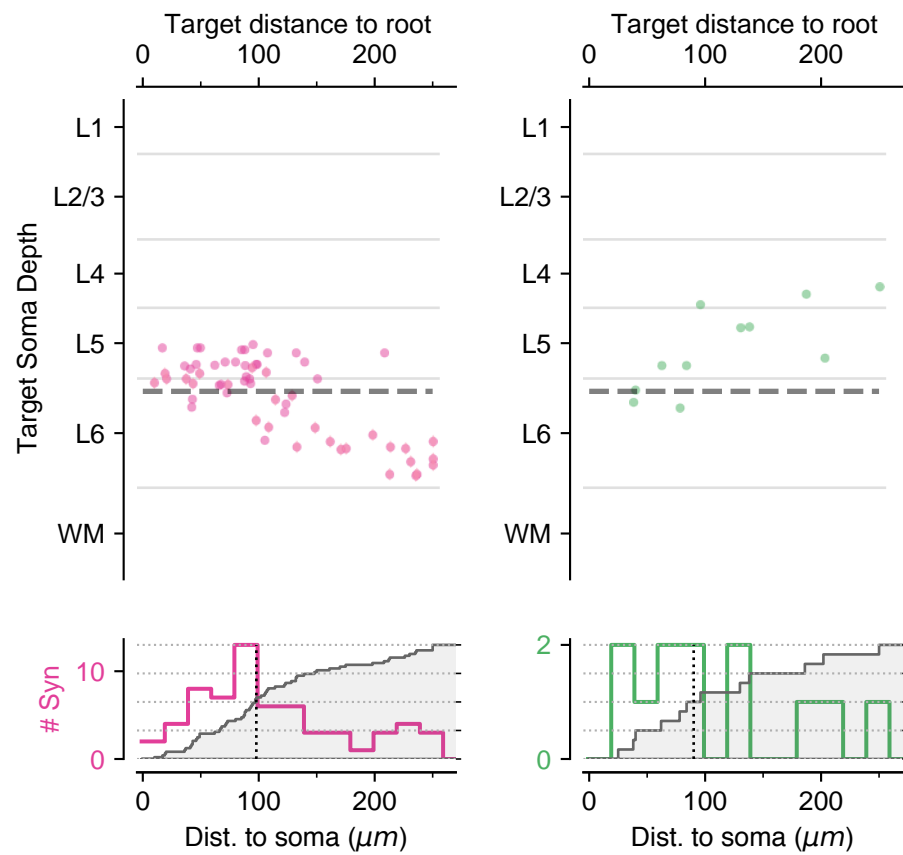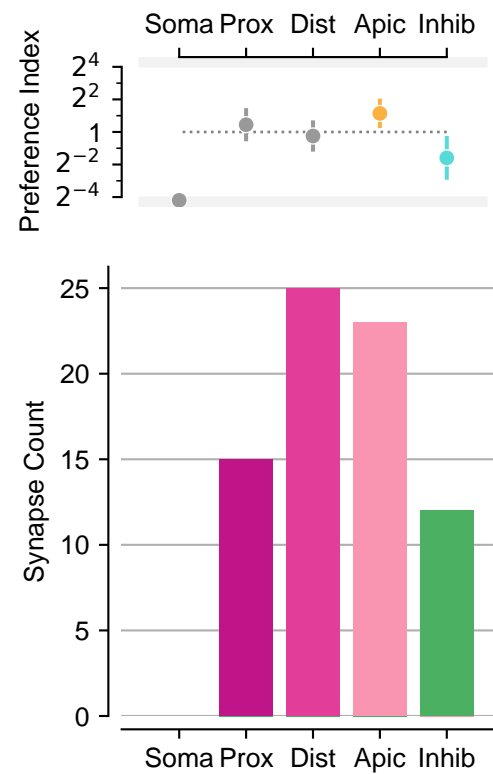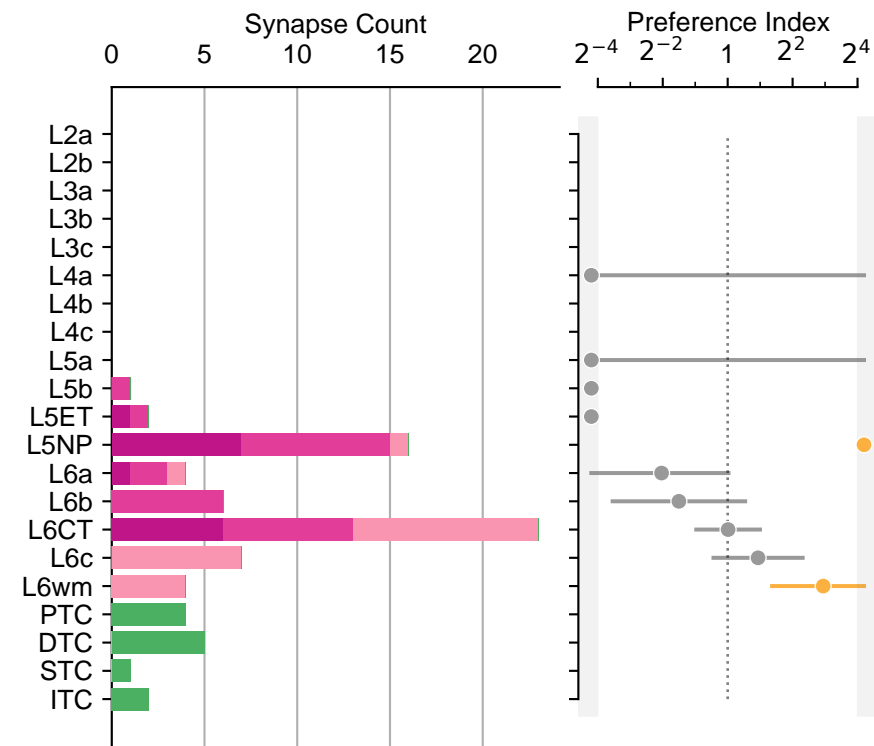

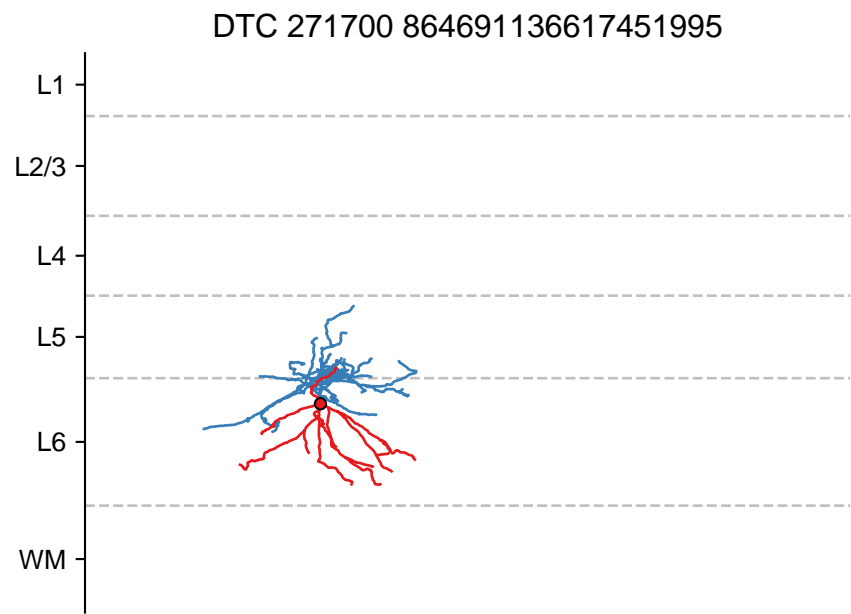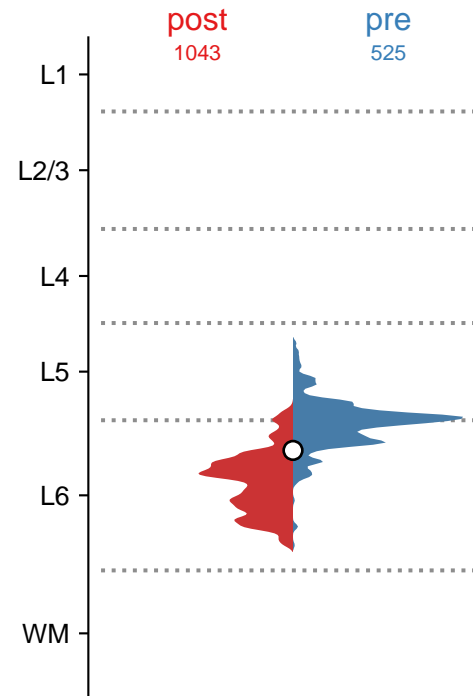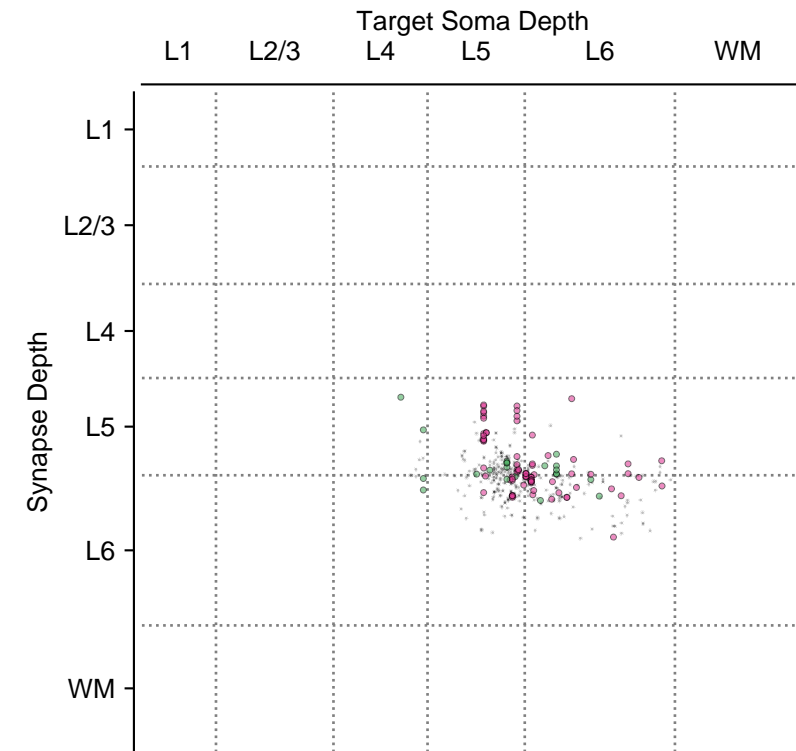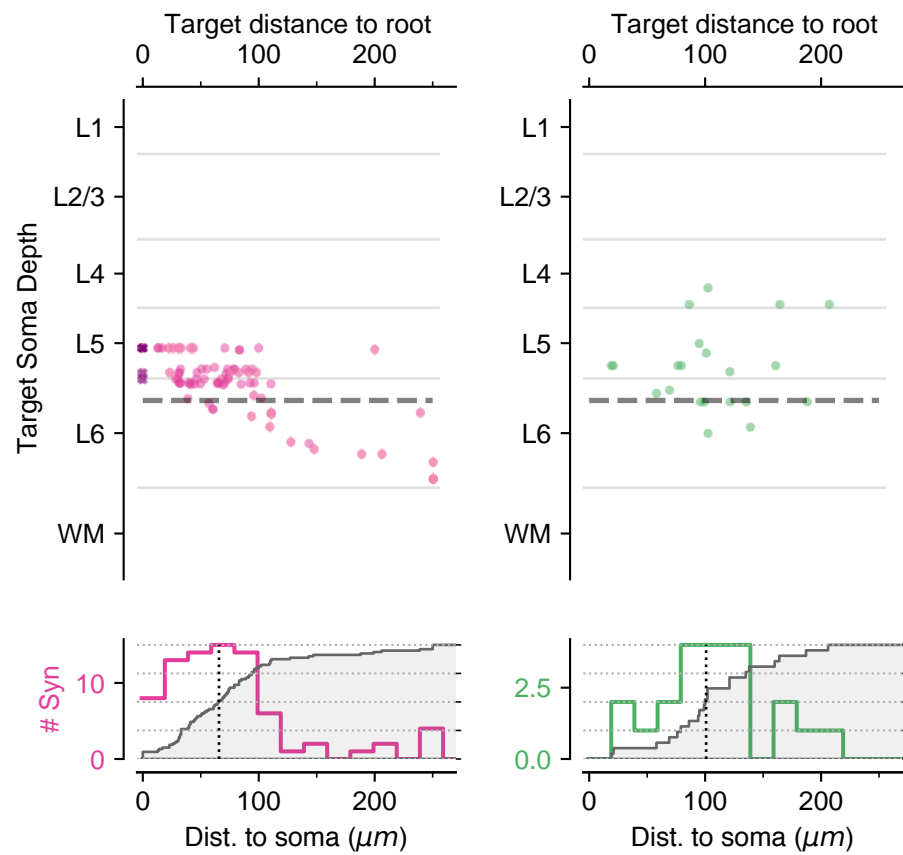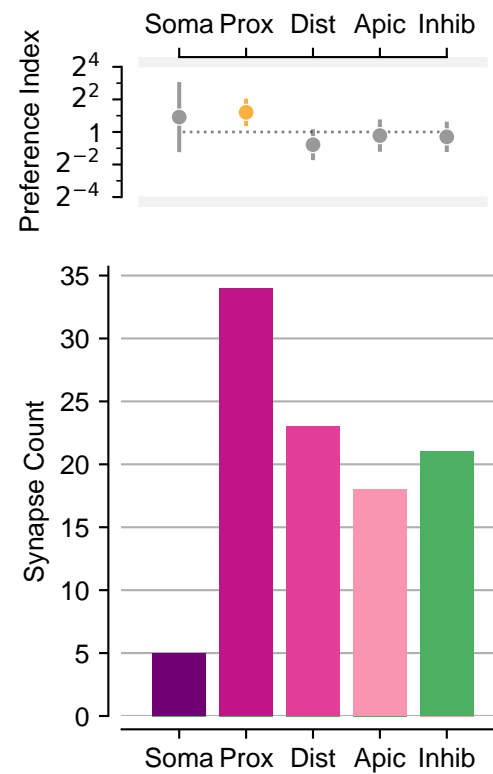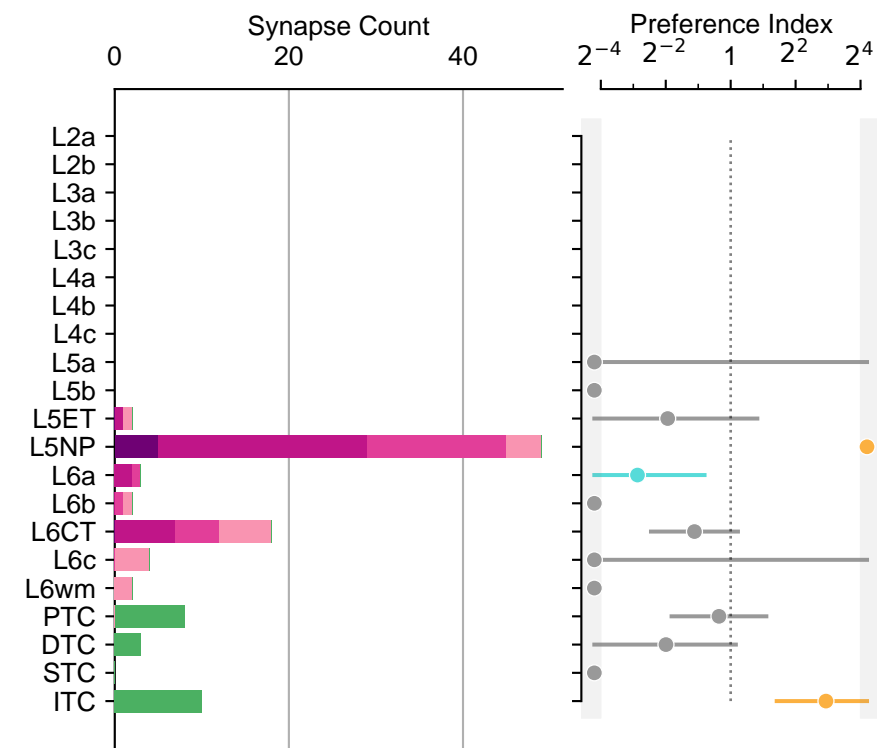

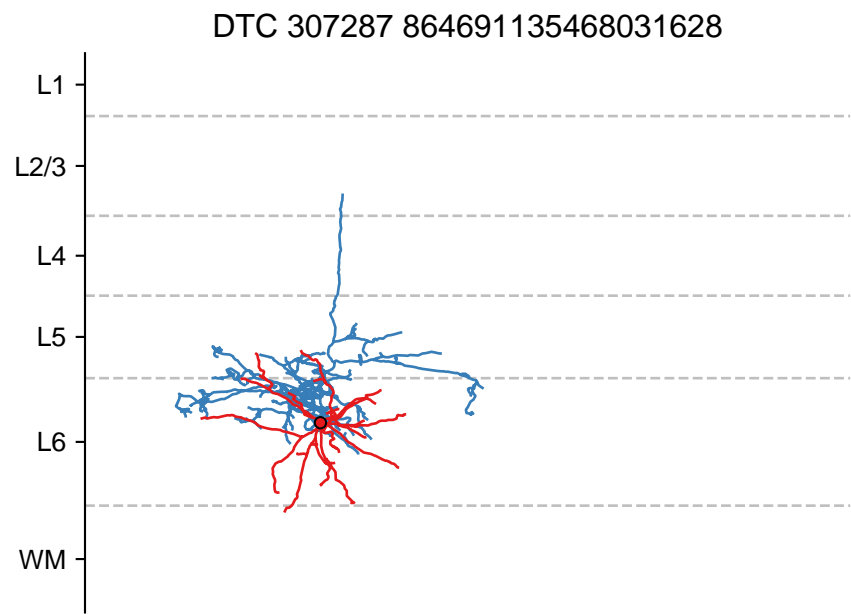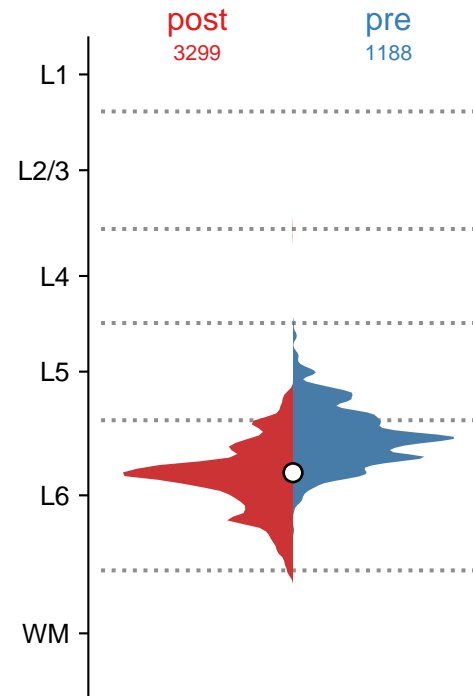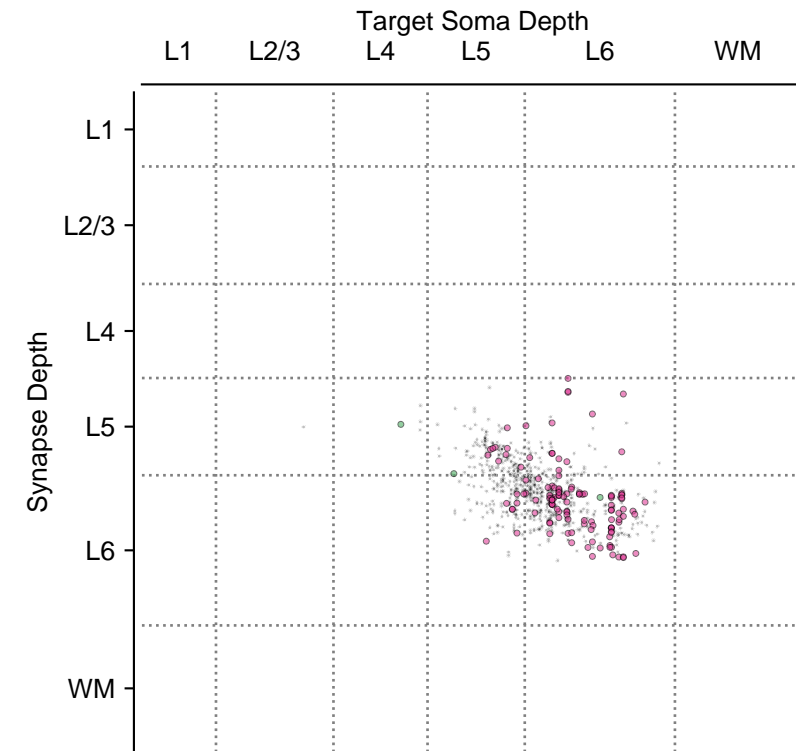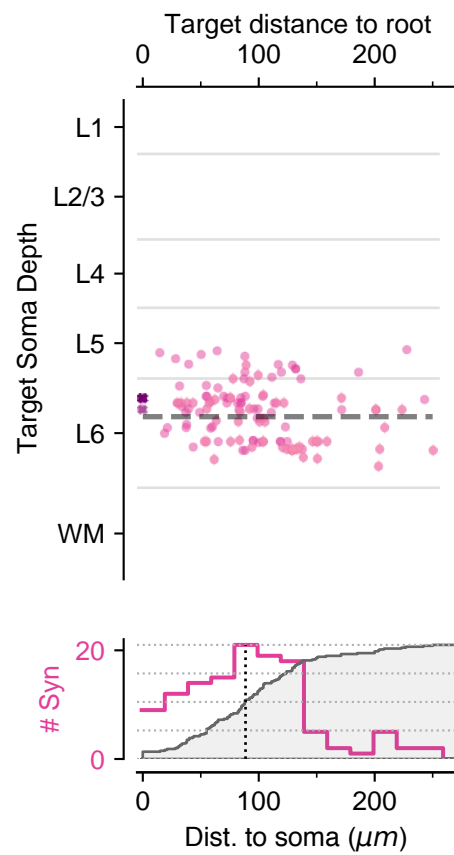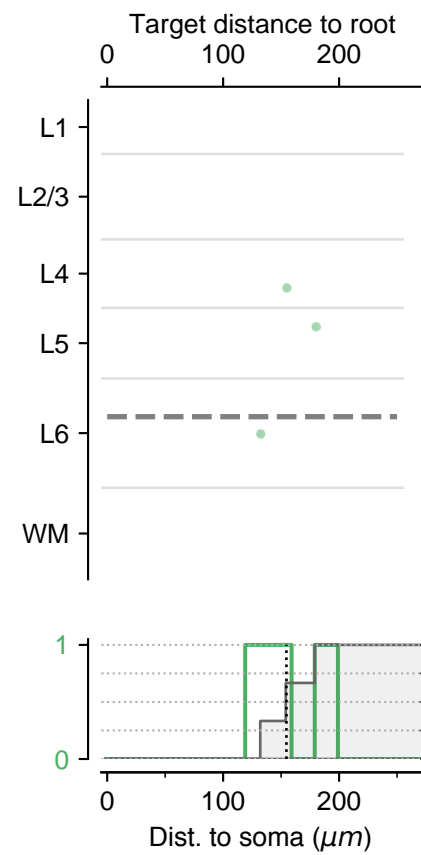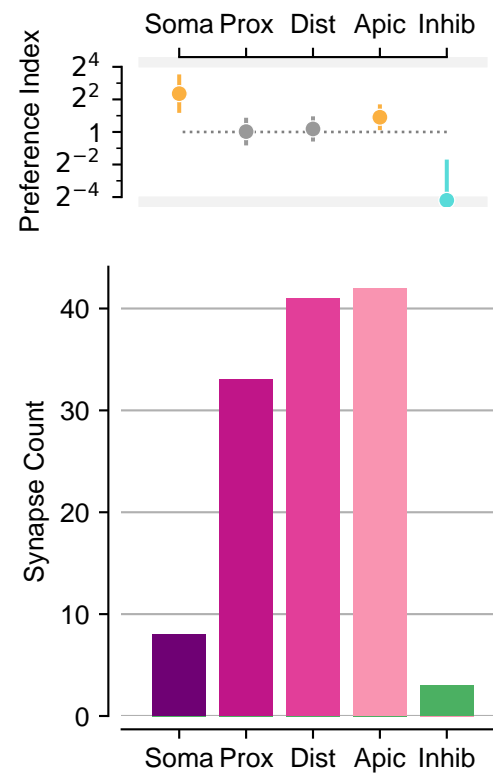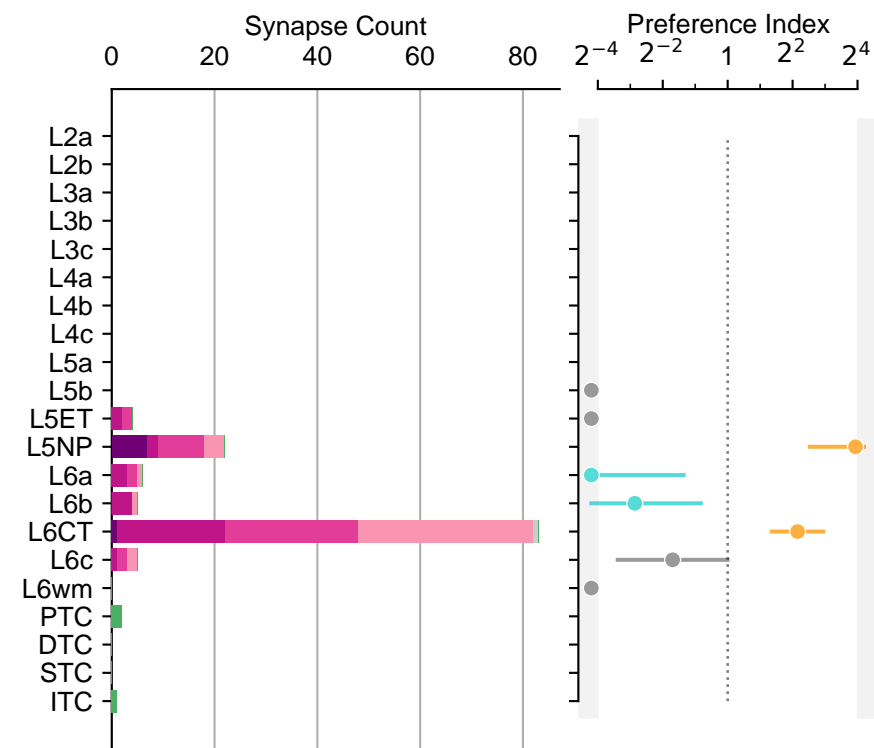



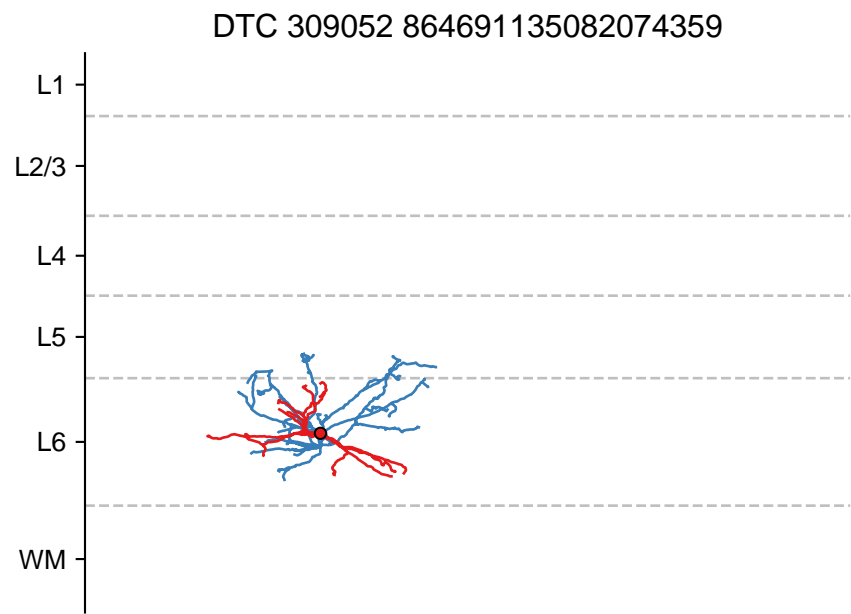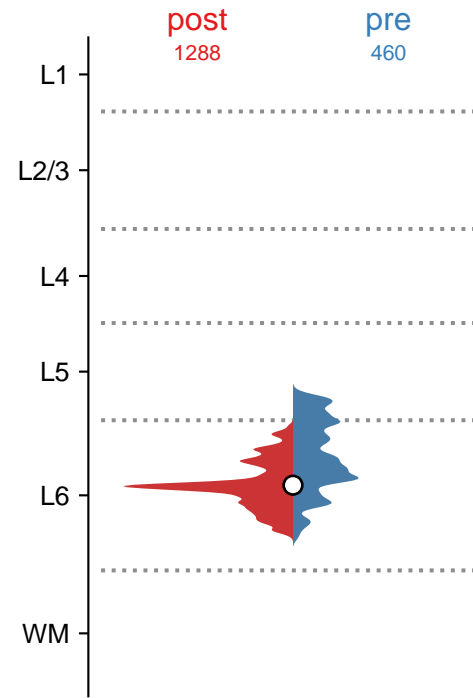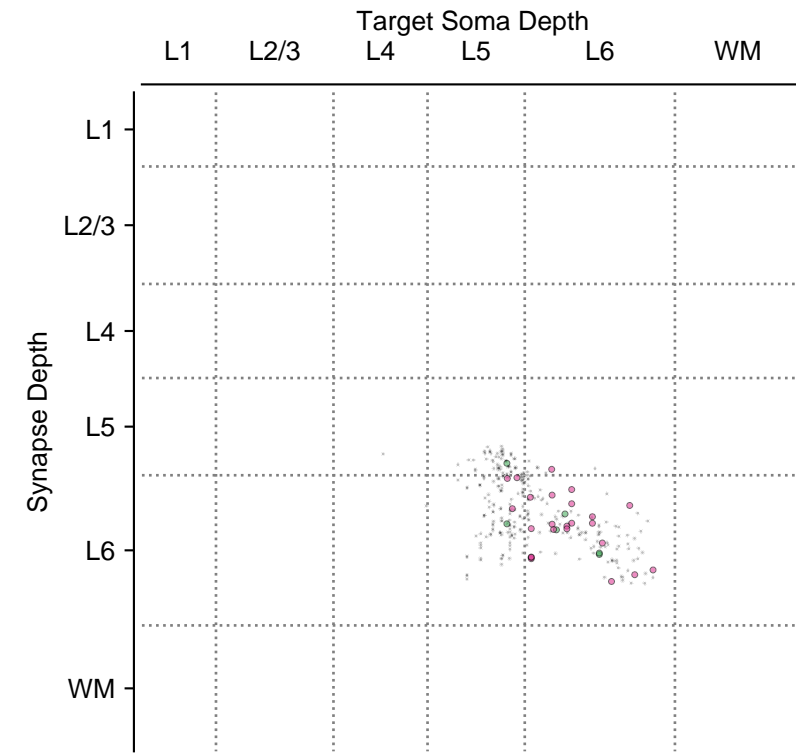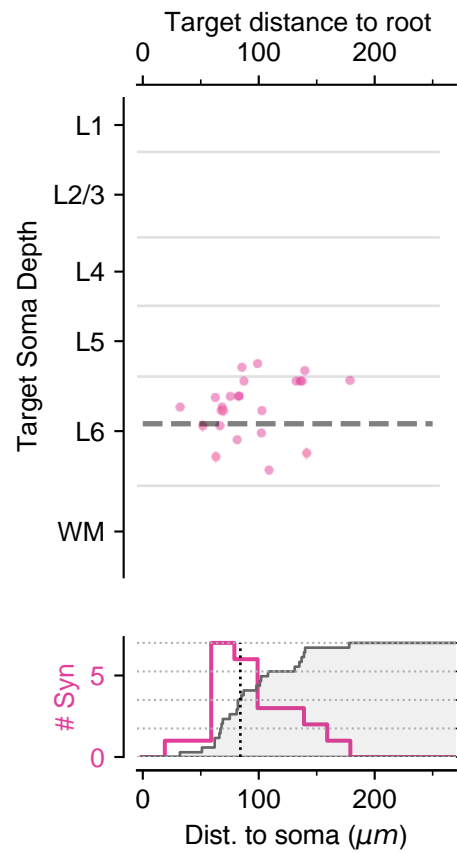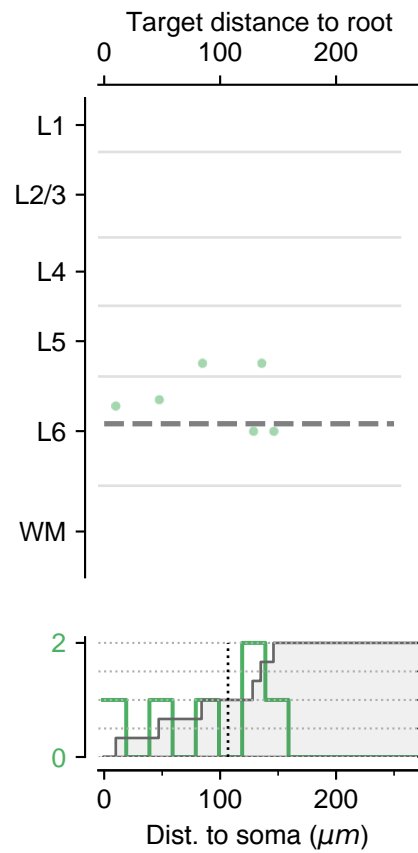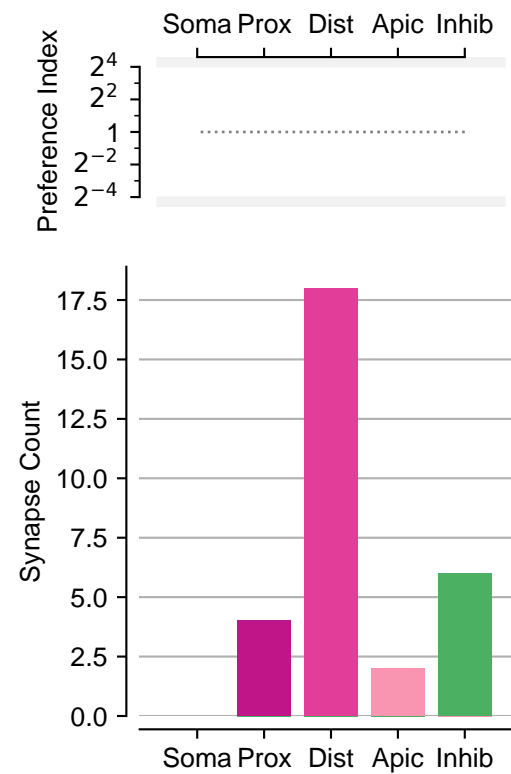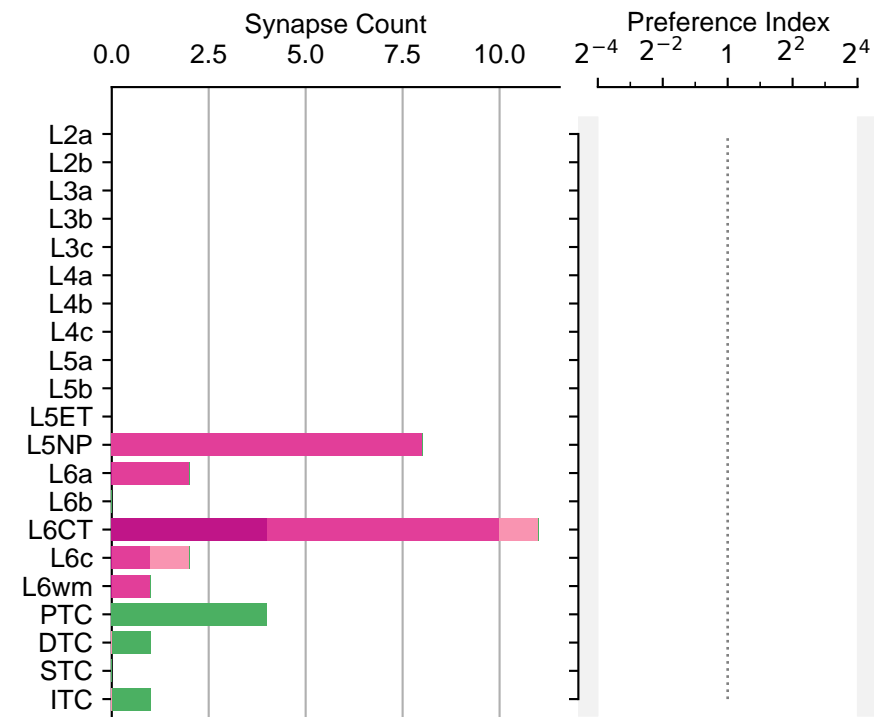

# Group 16

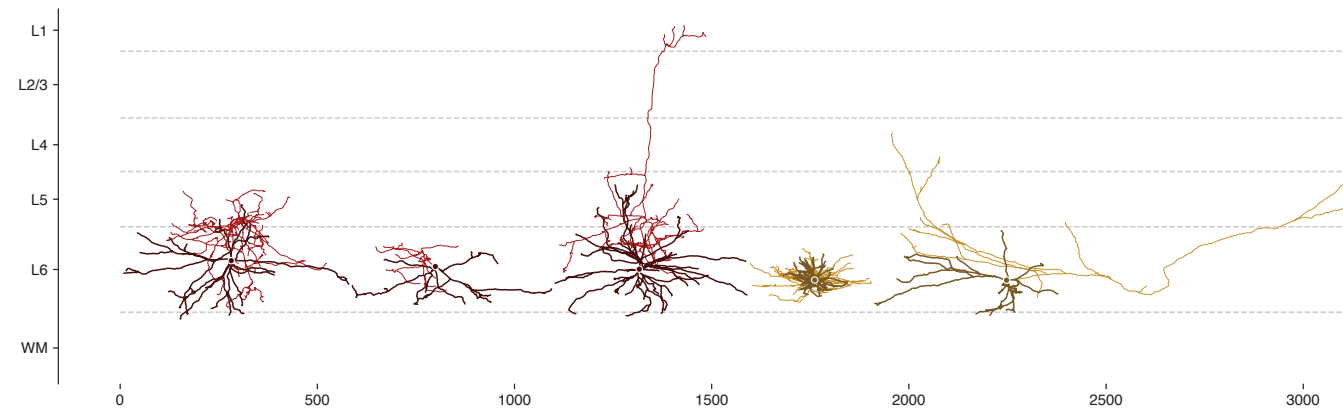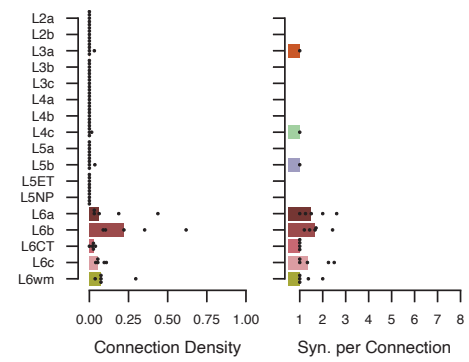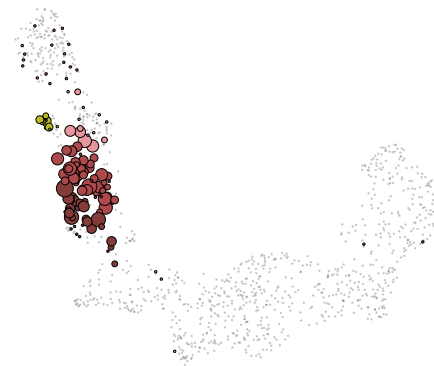

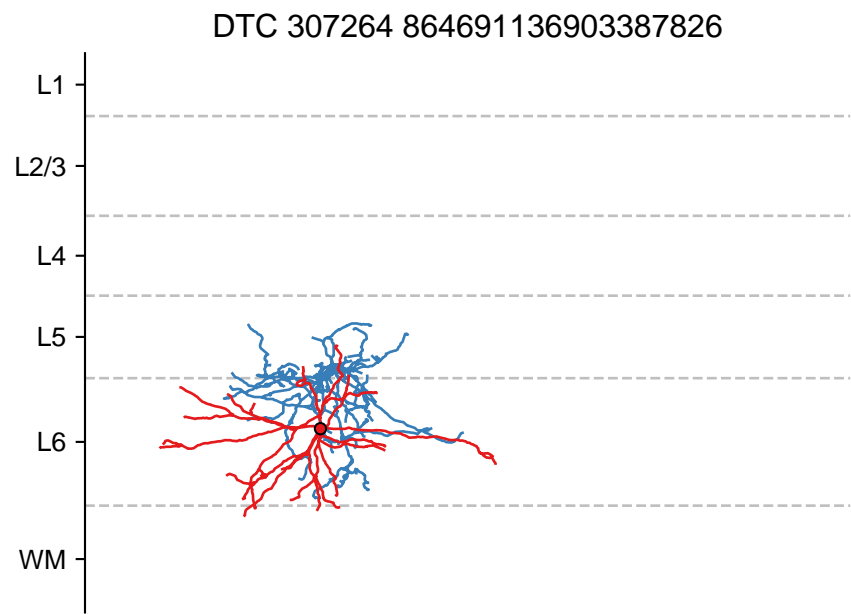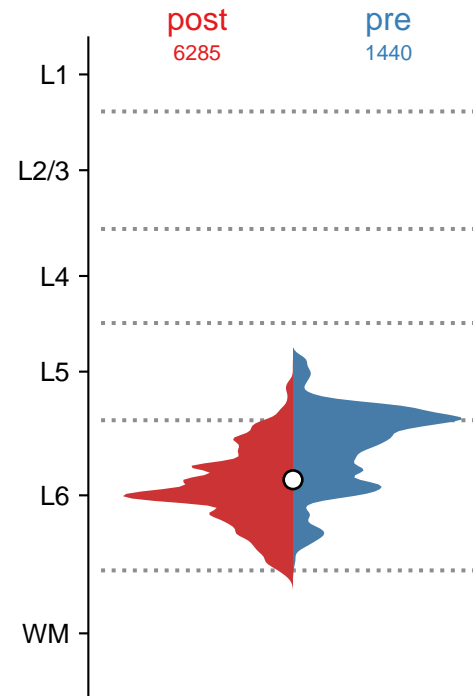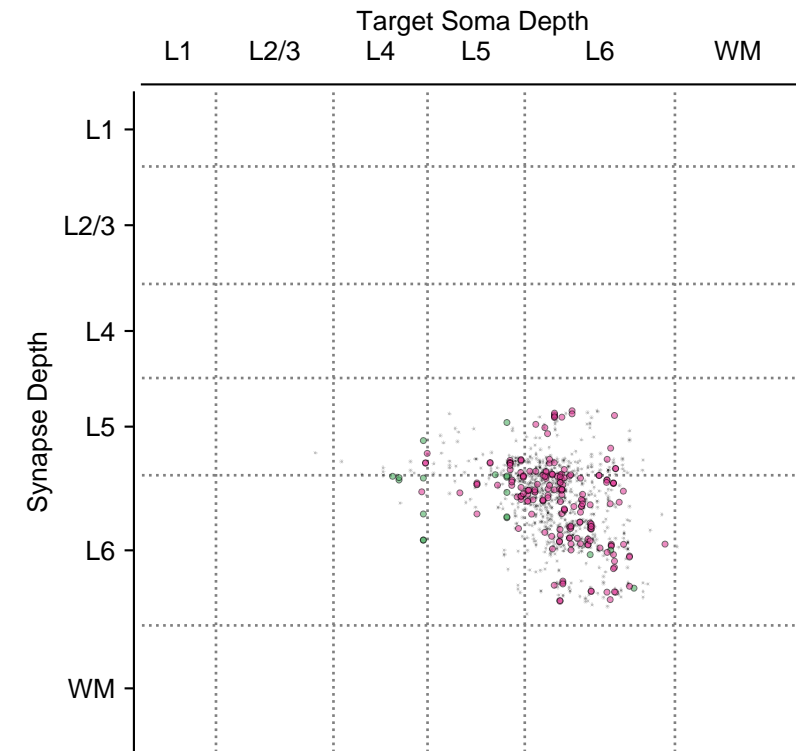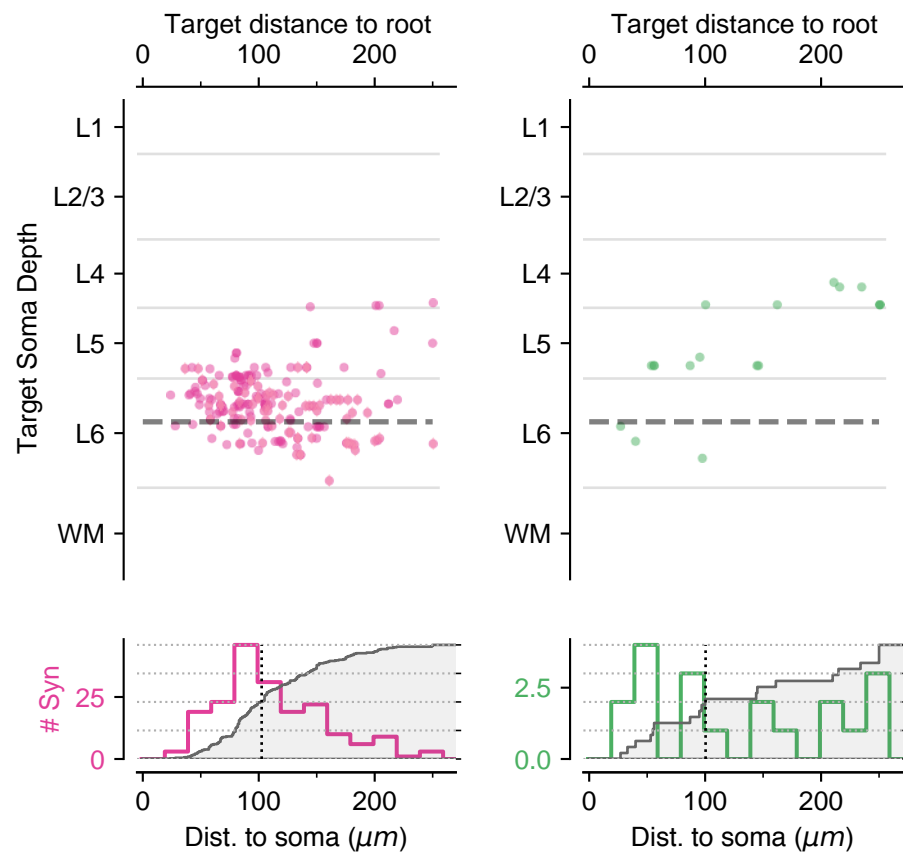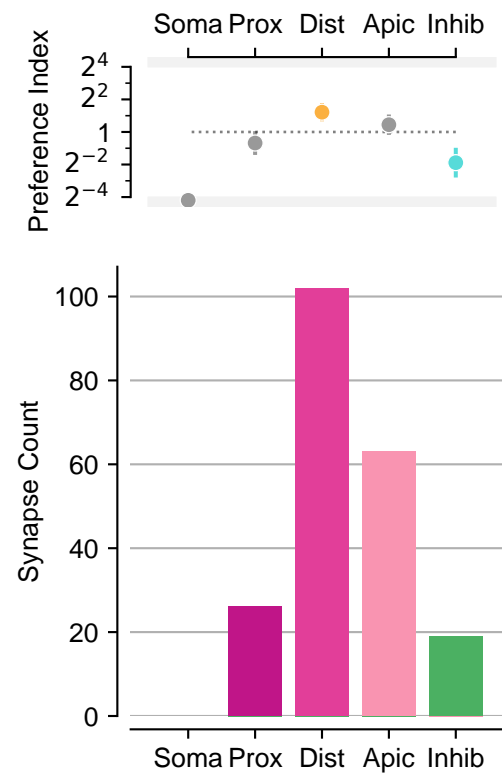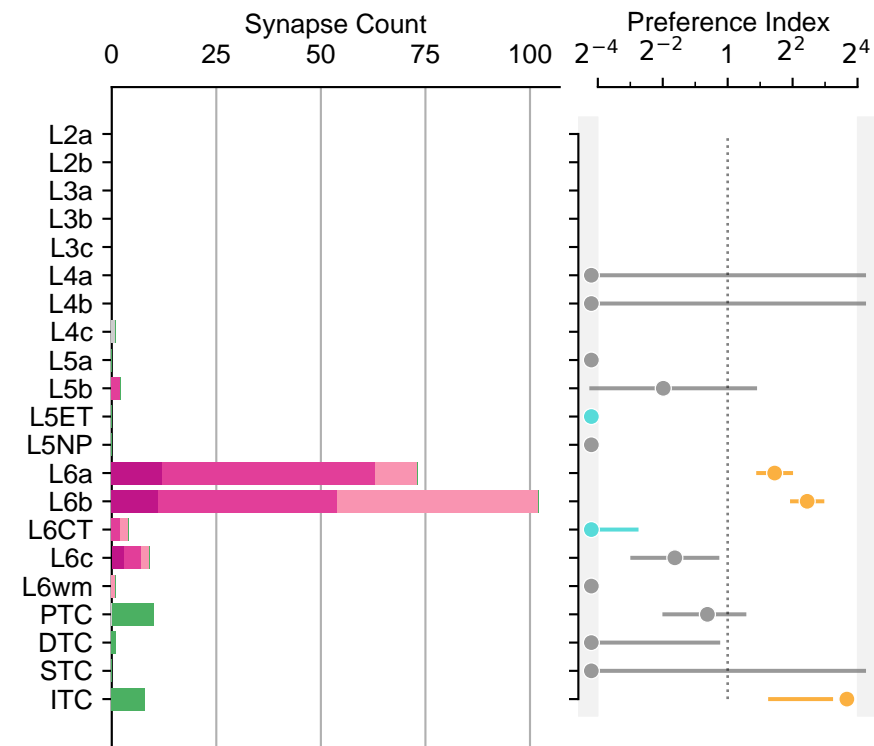

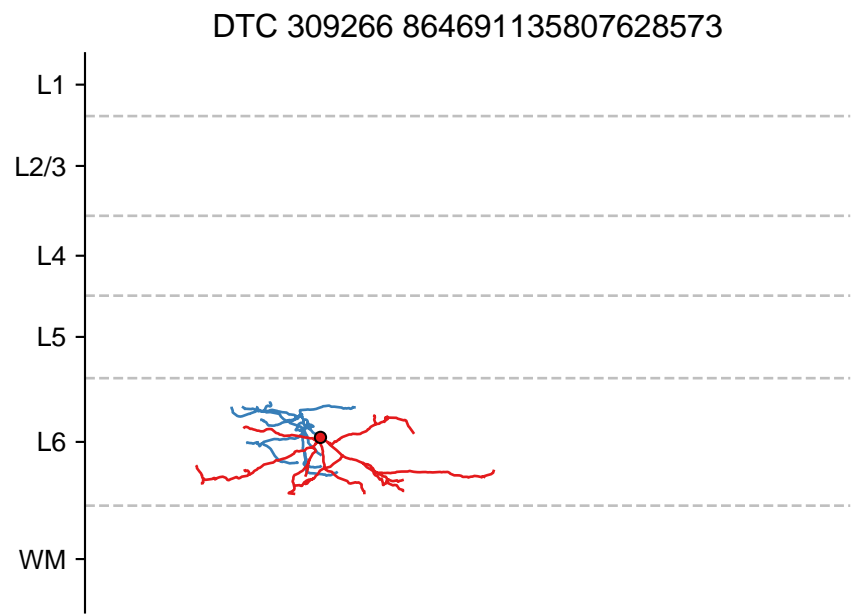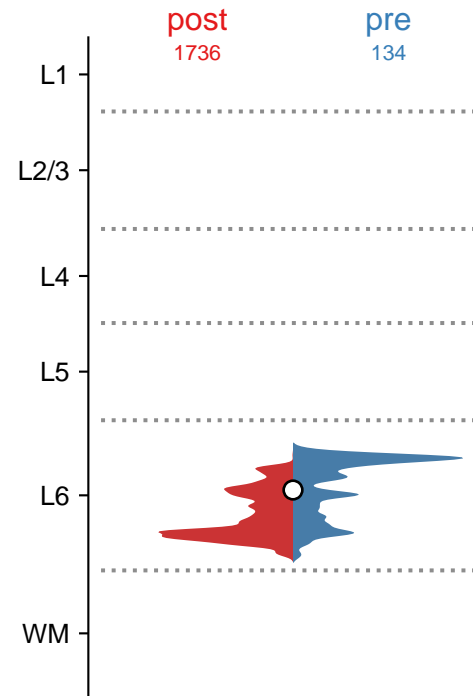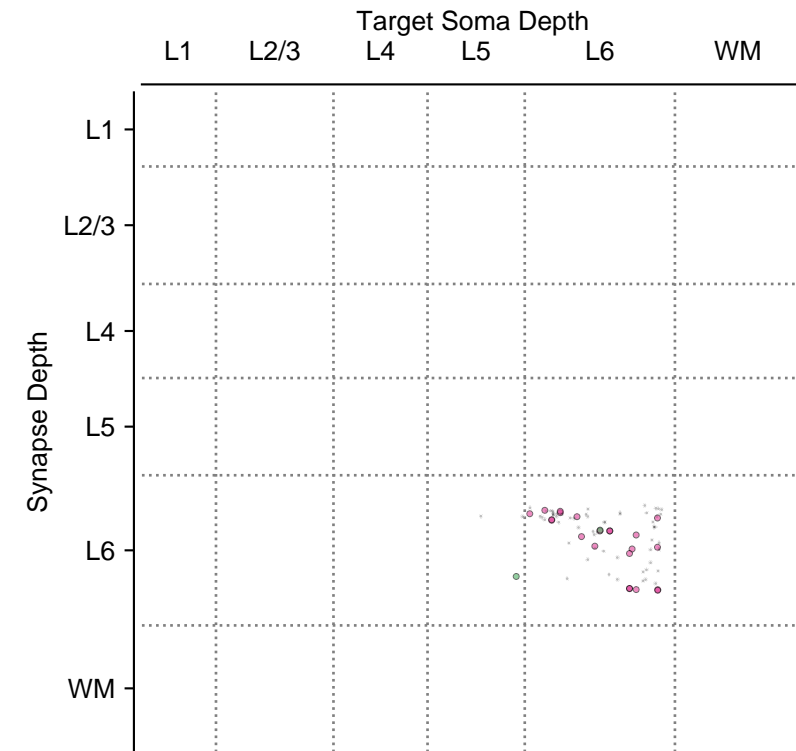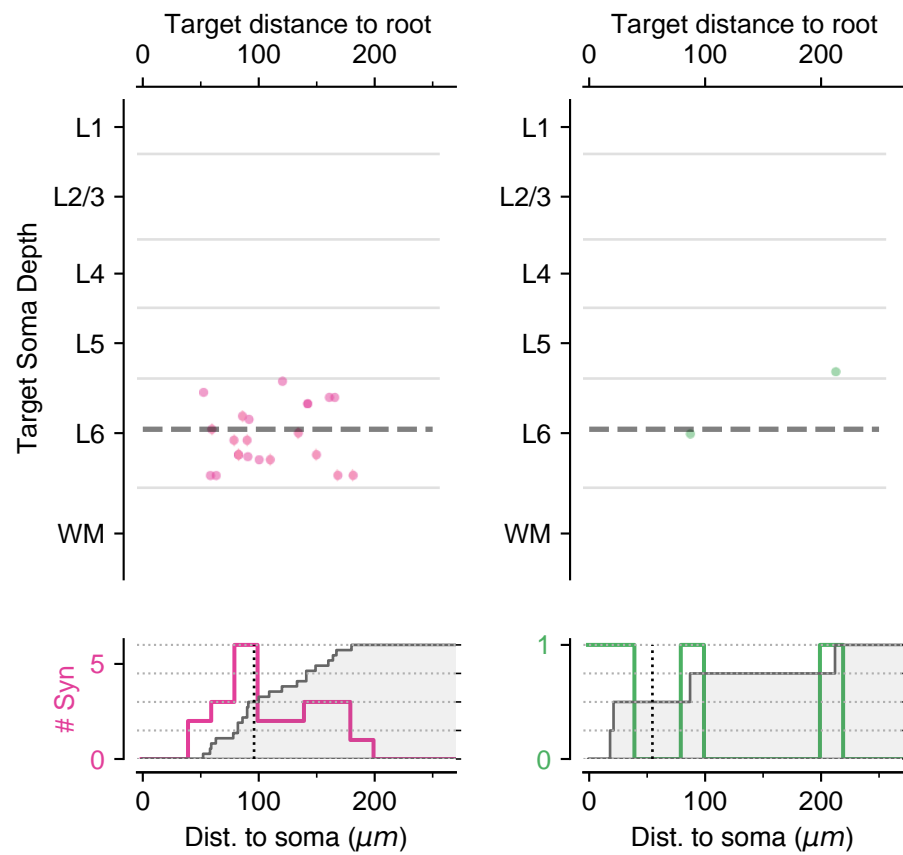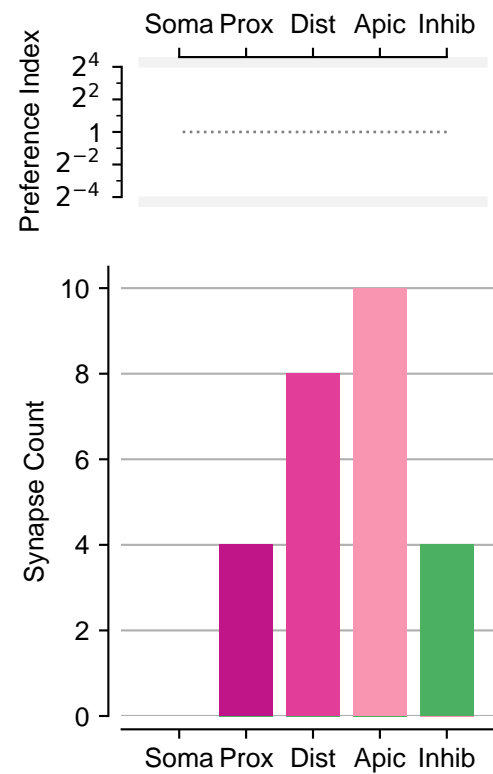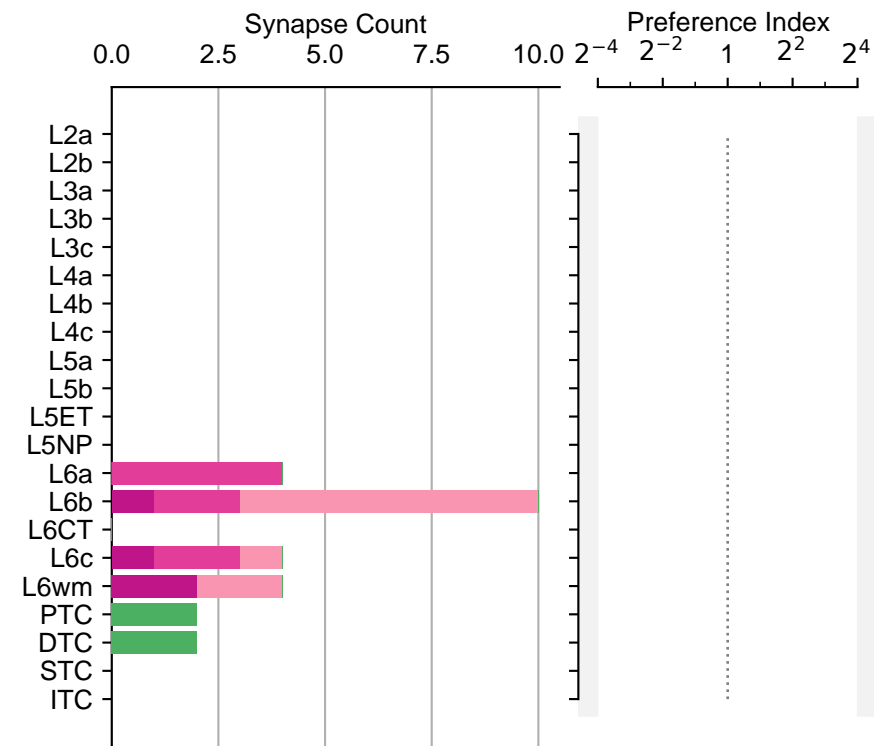

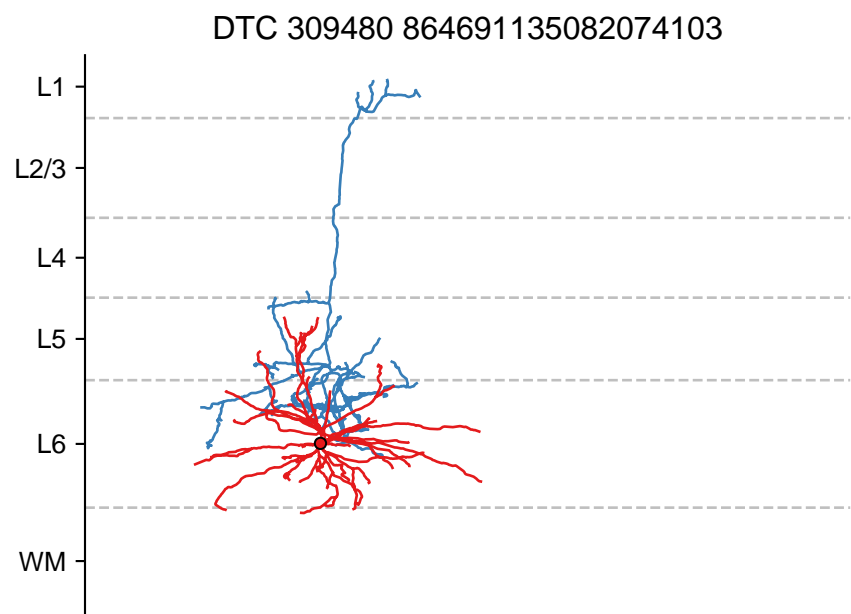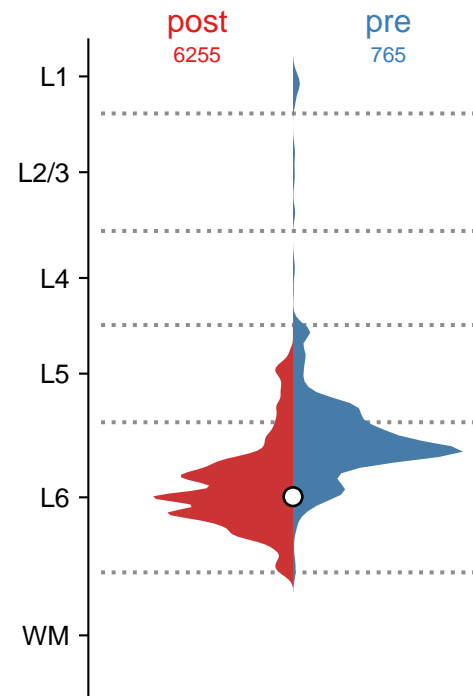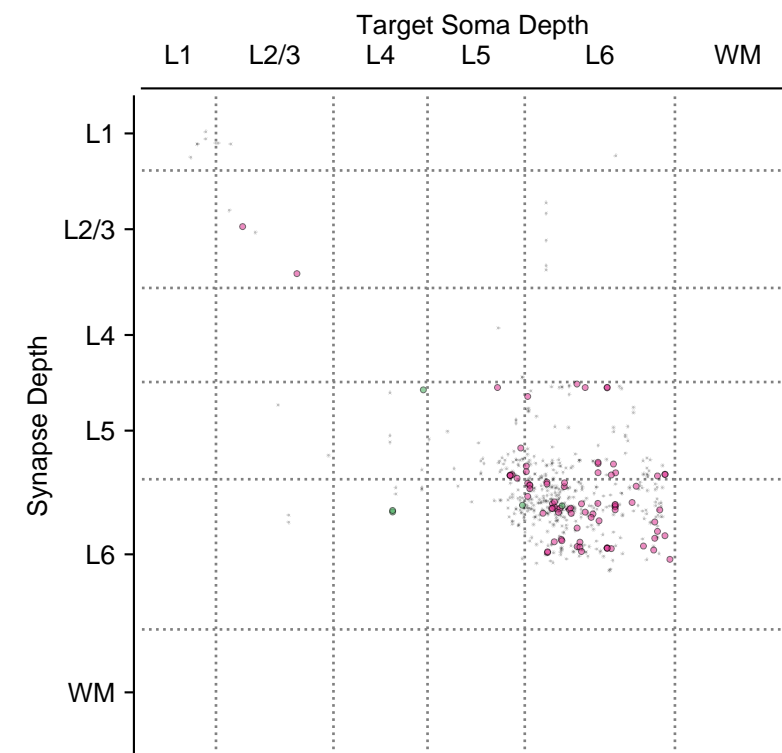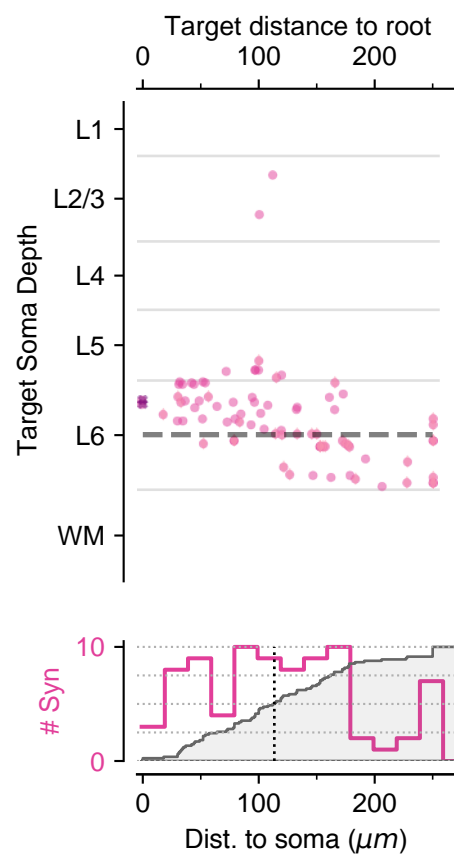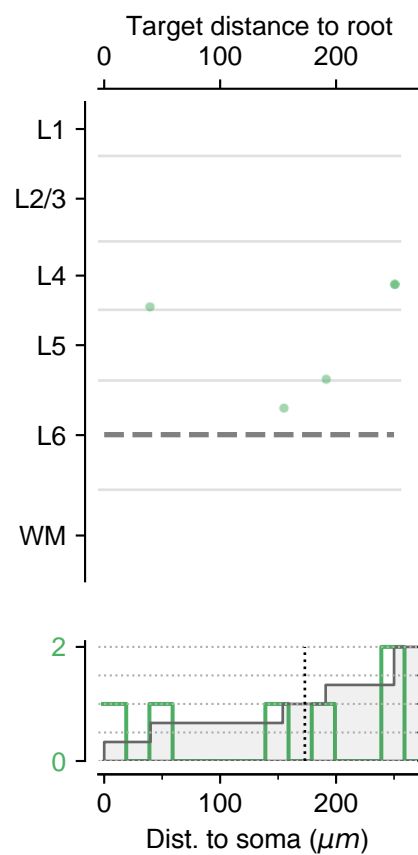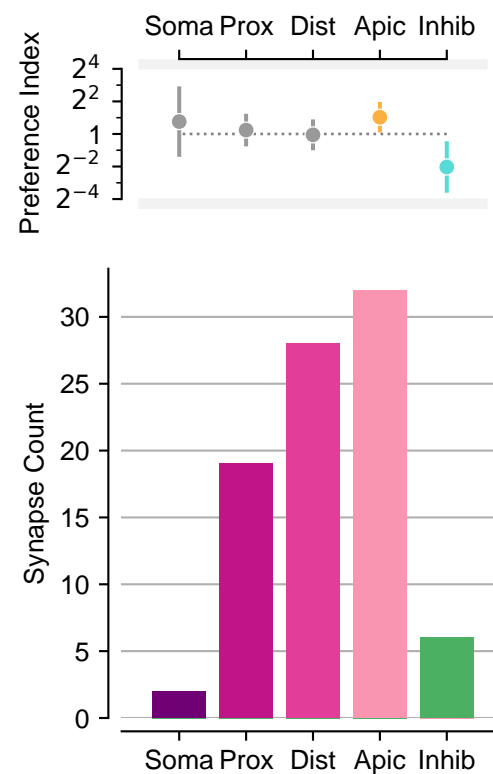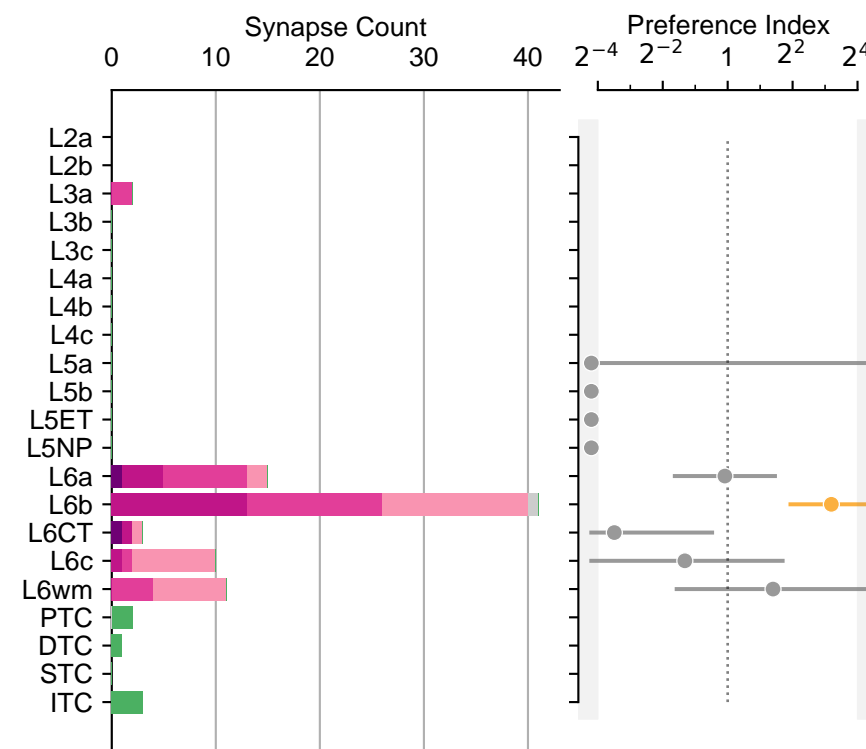

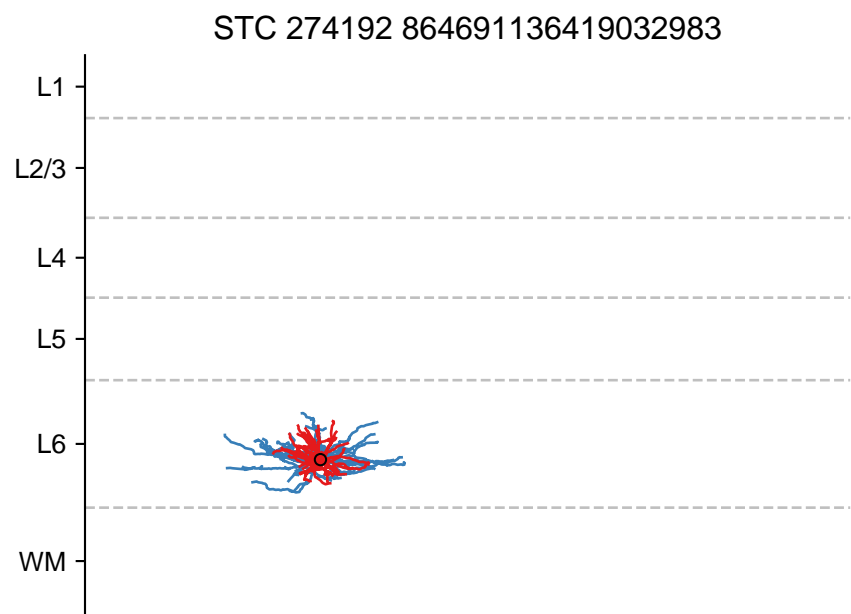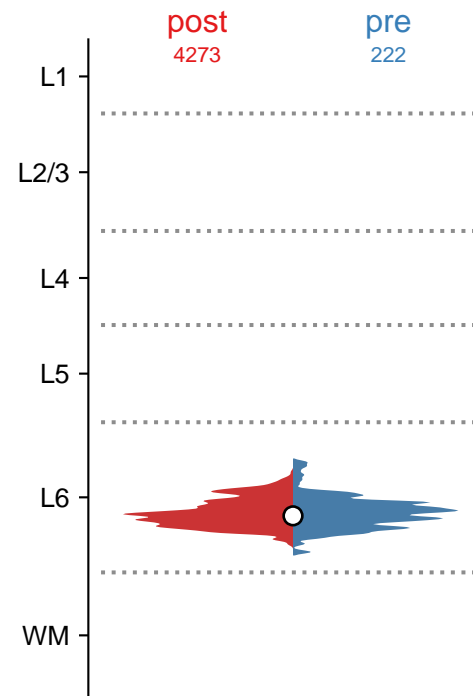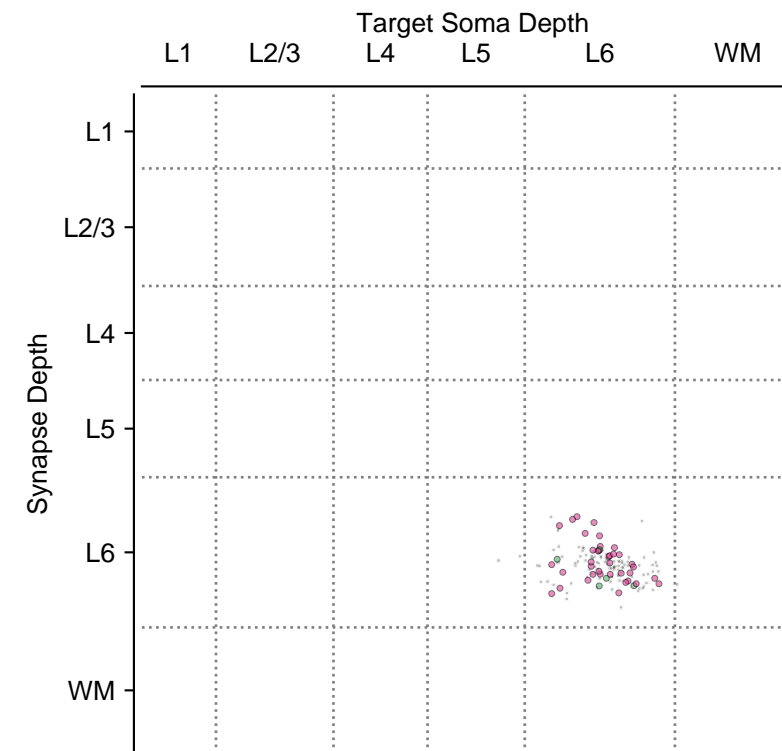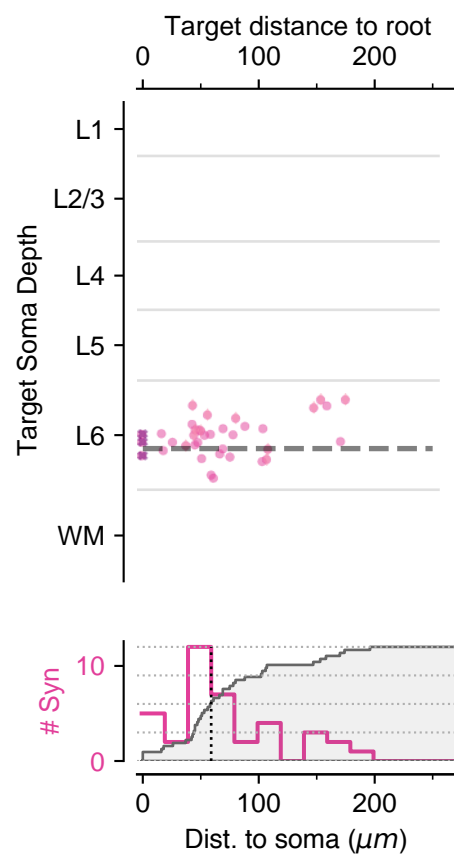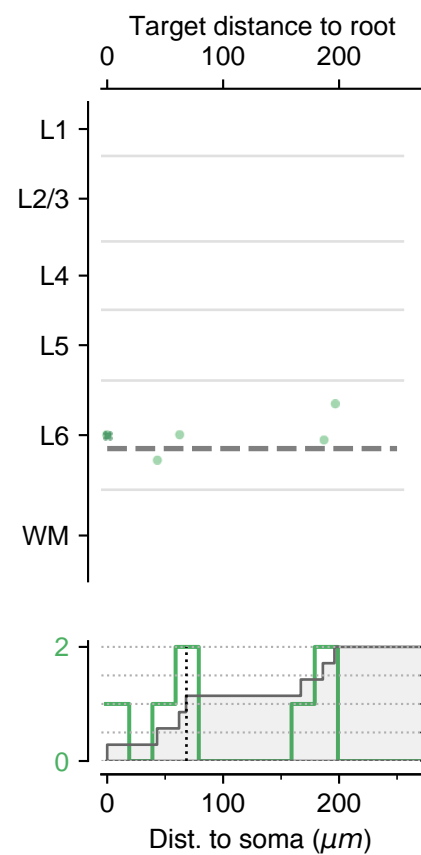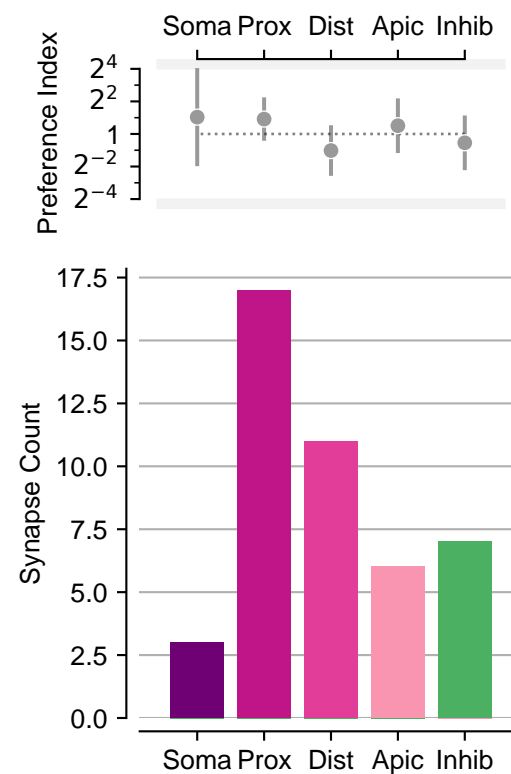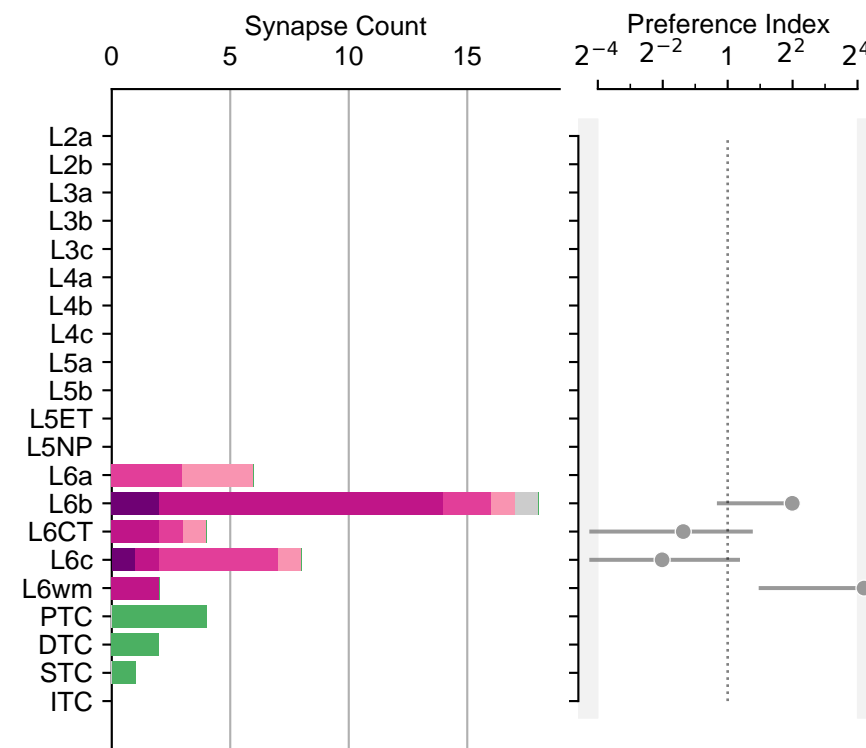

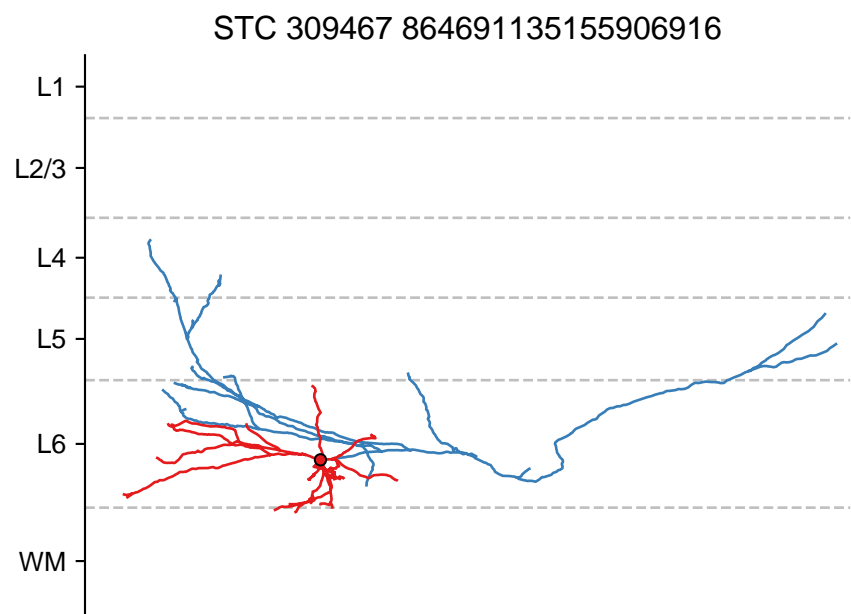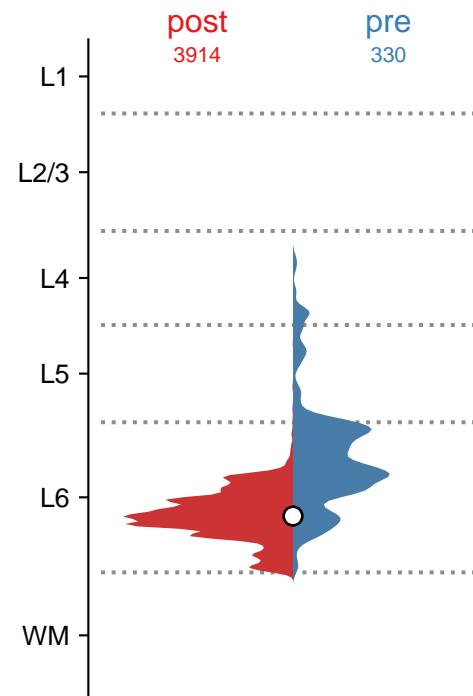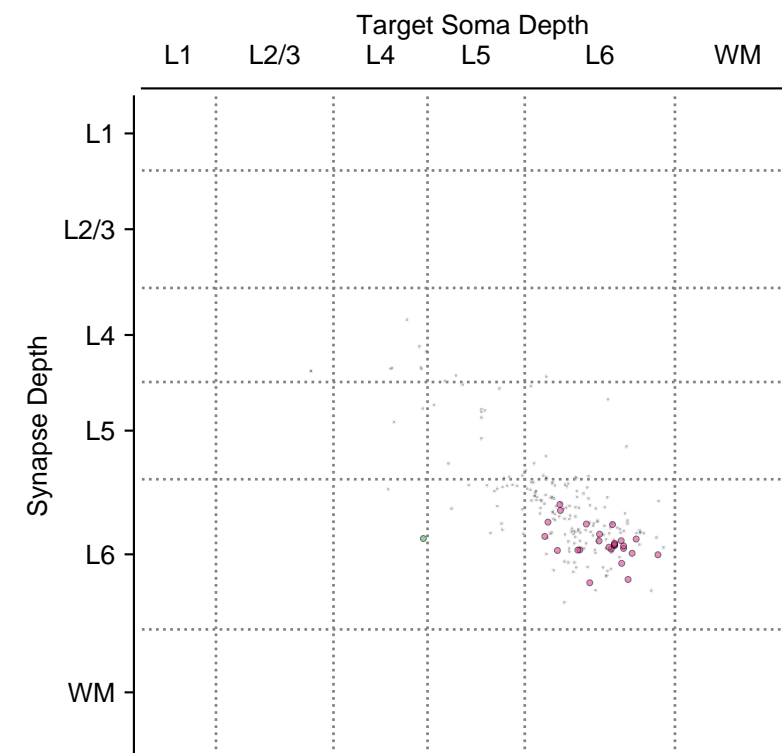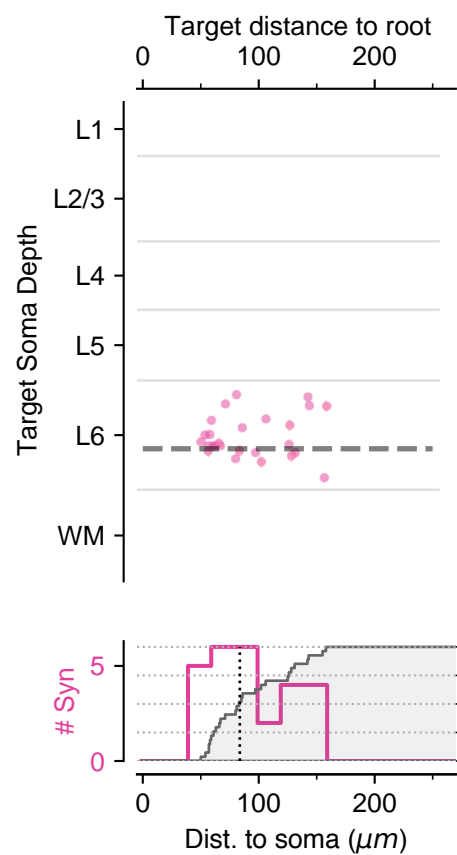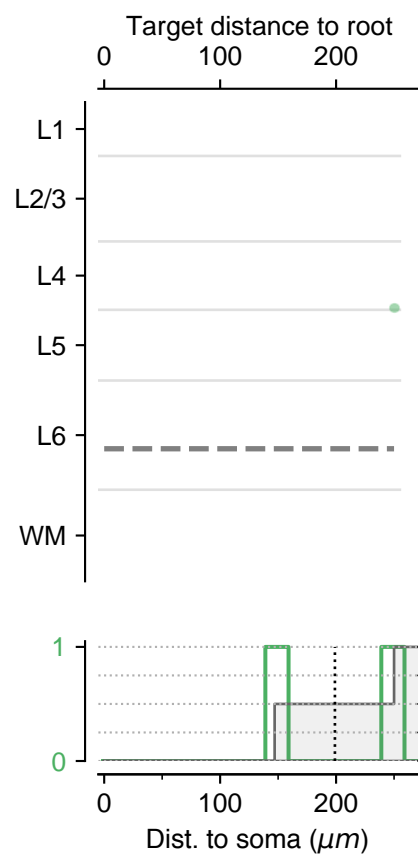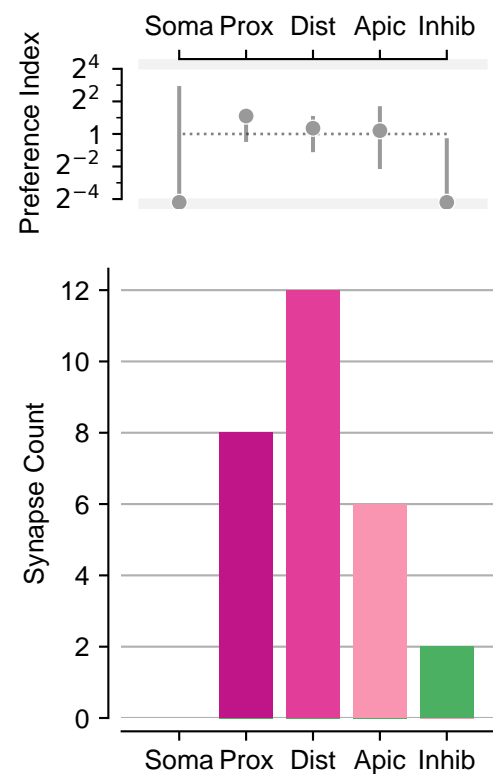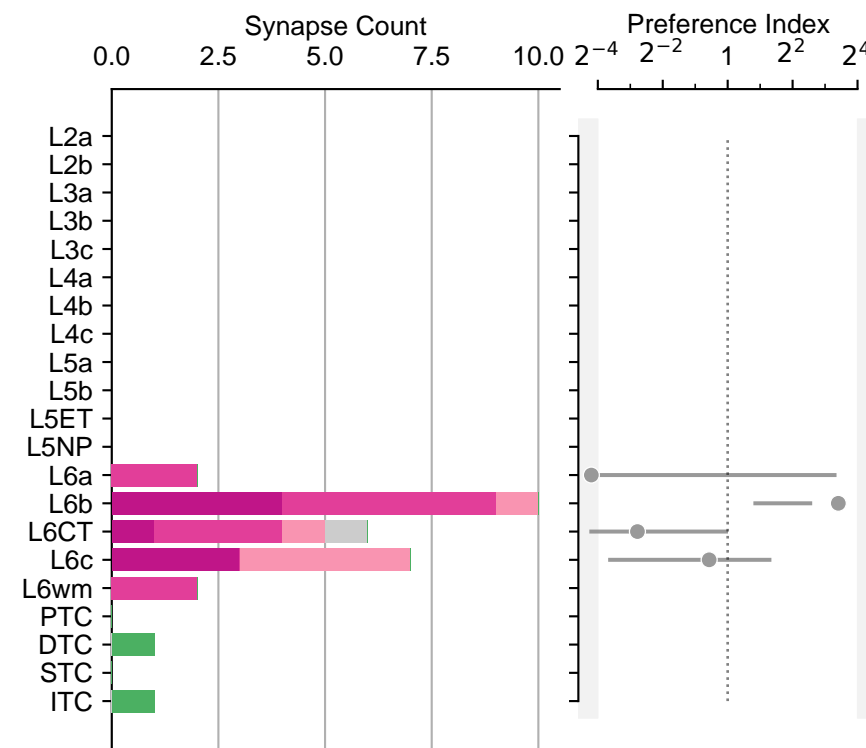

# Group 17

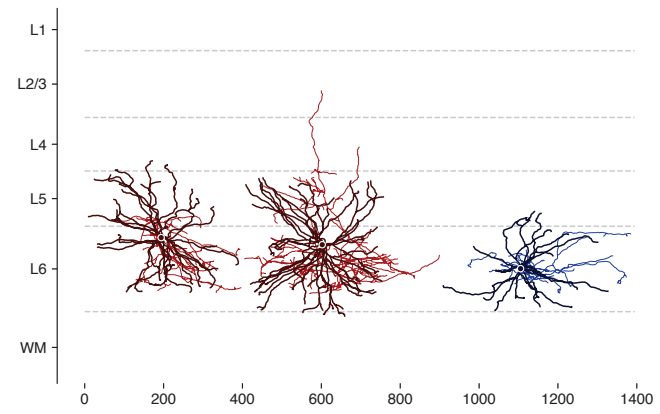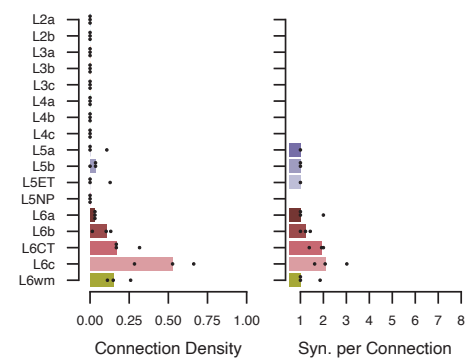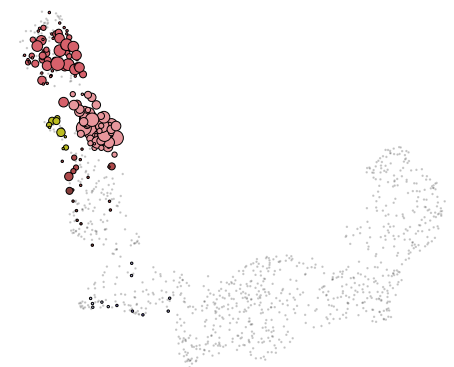



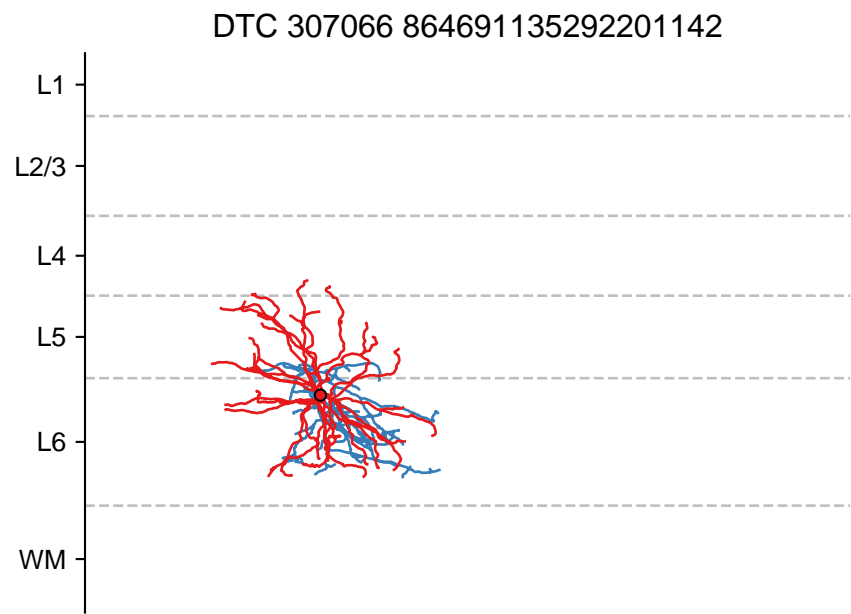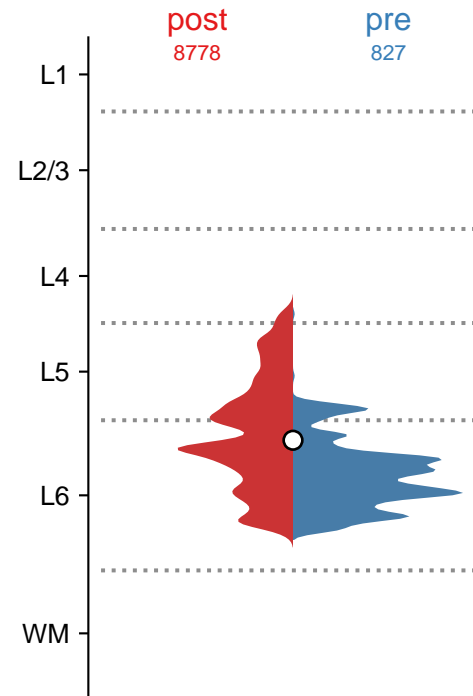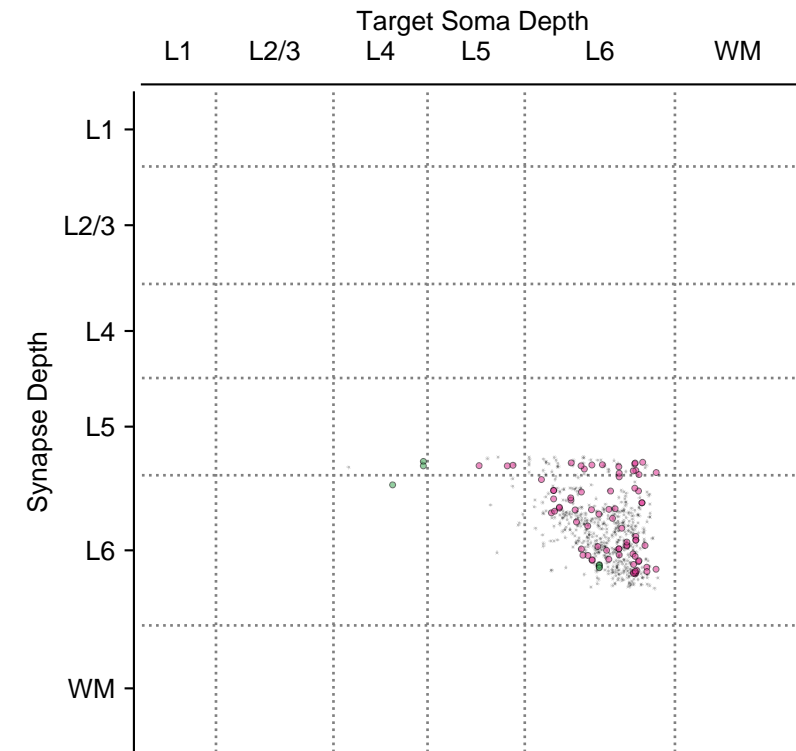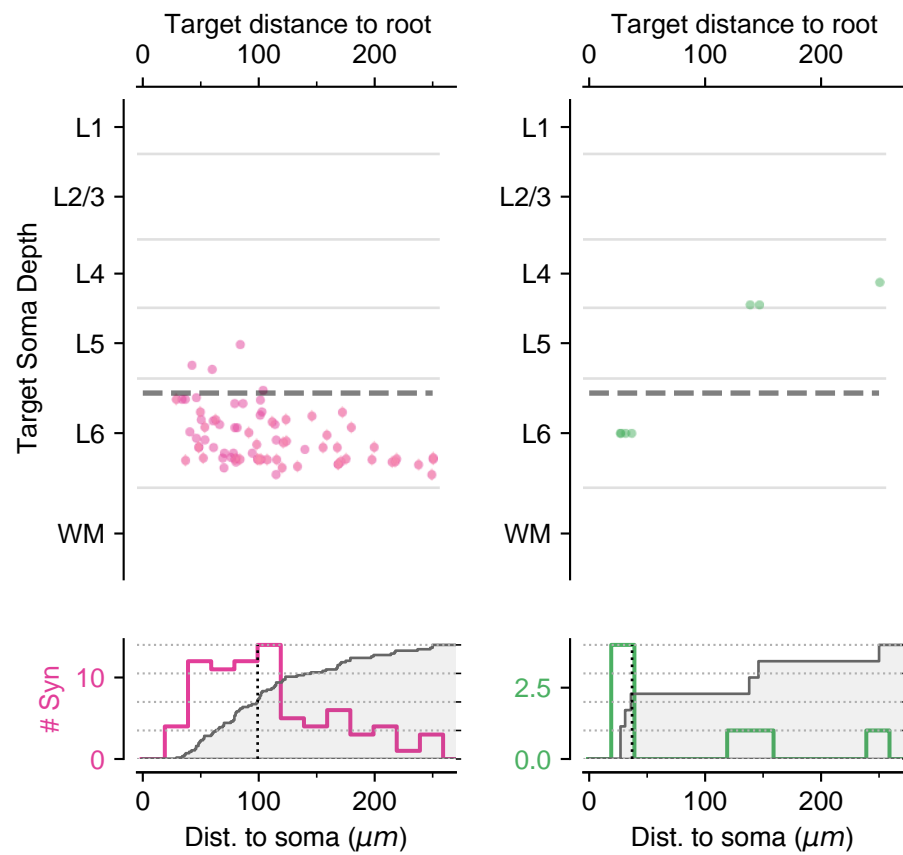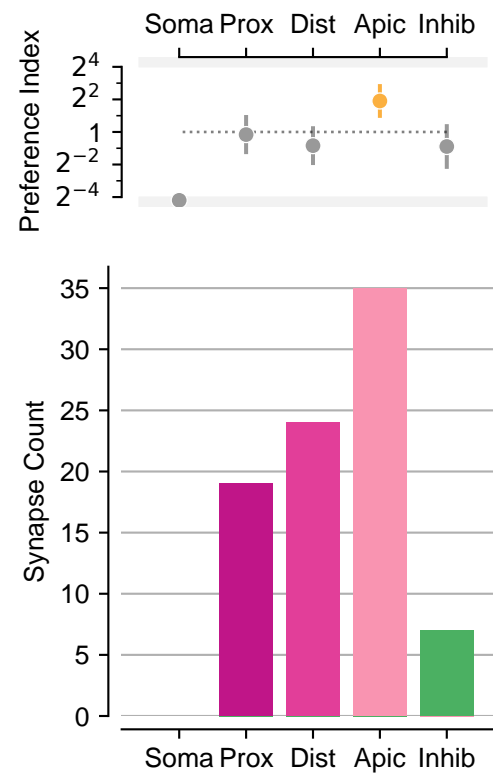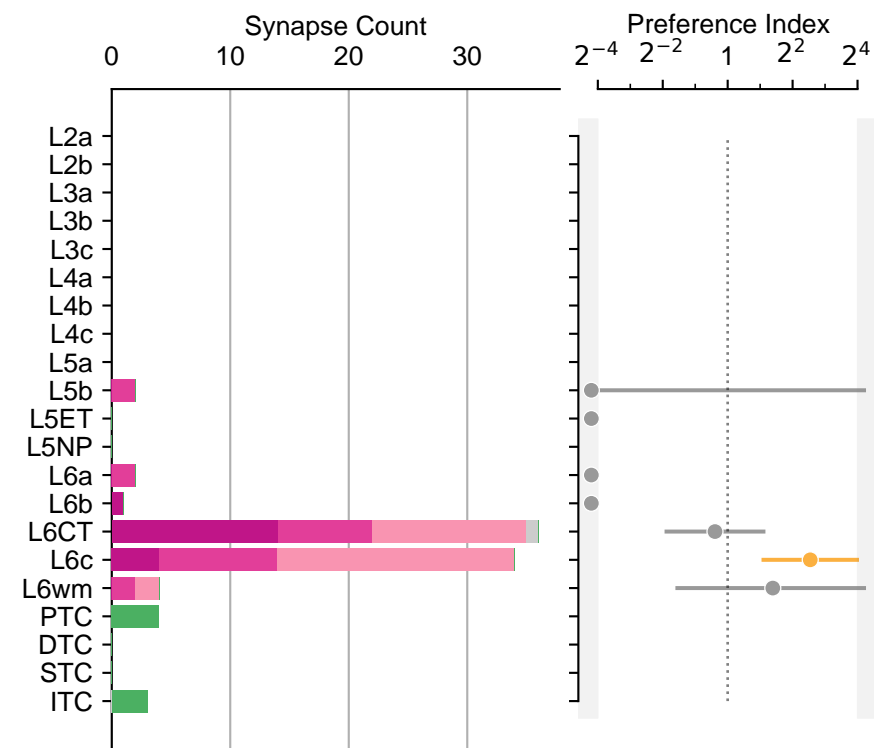

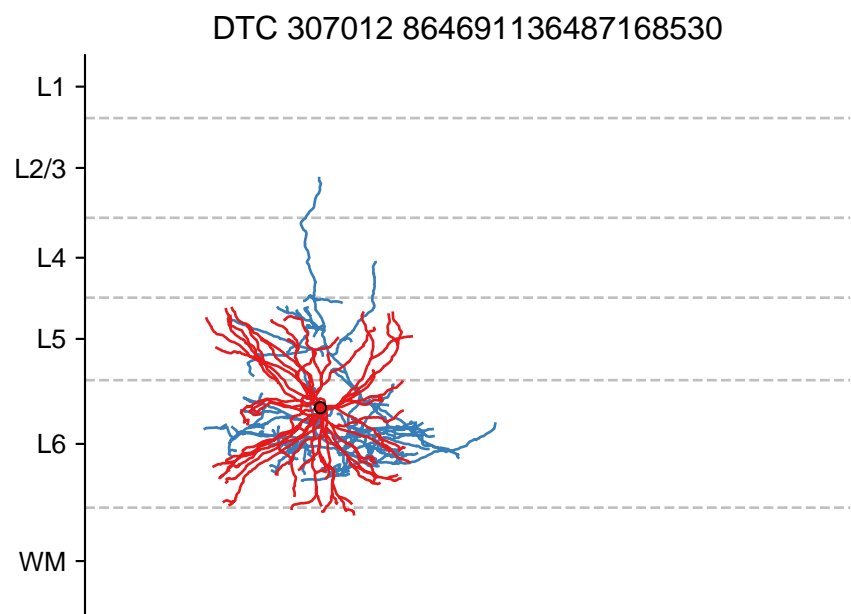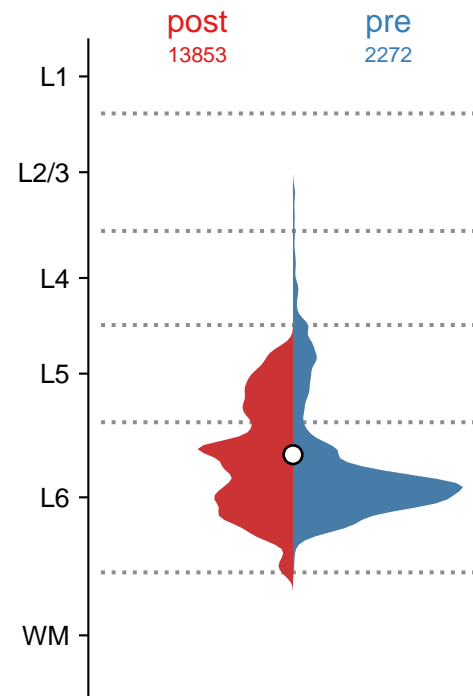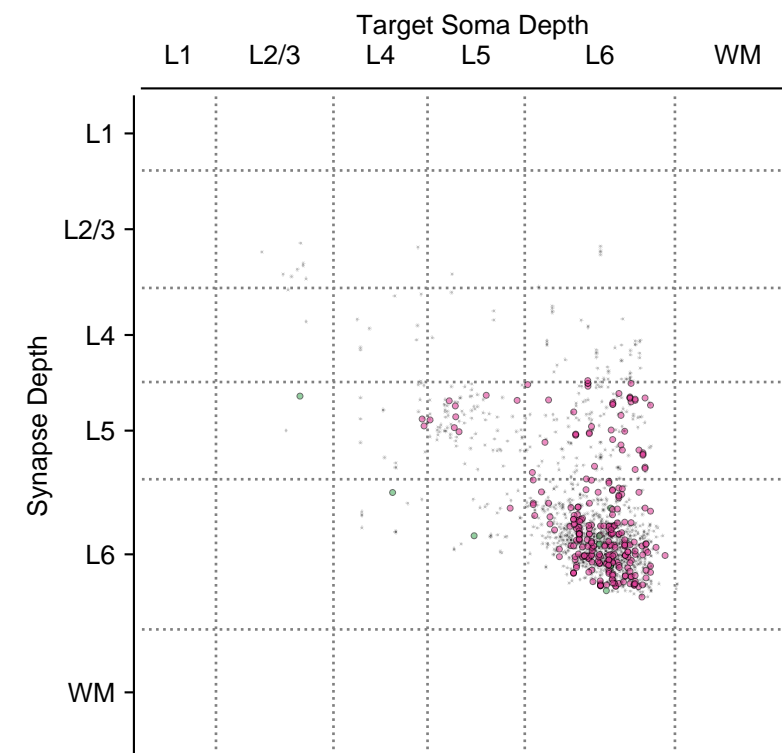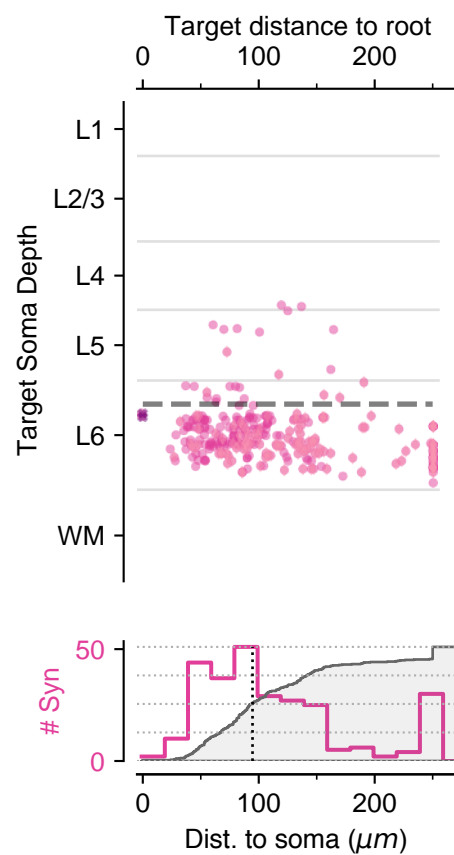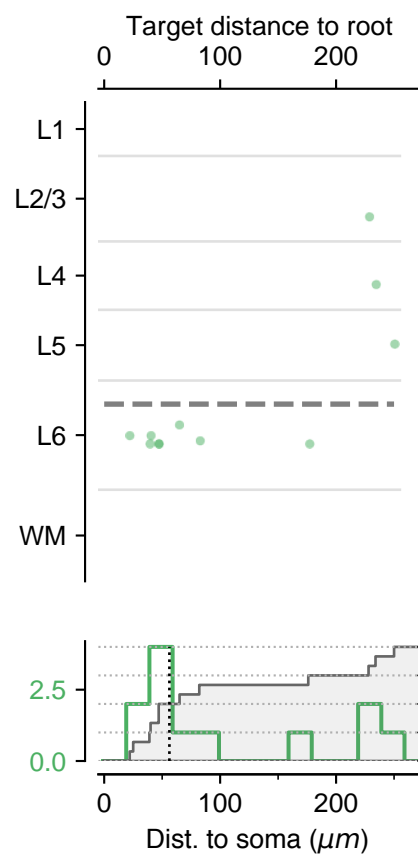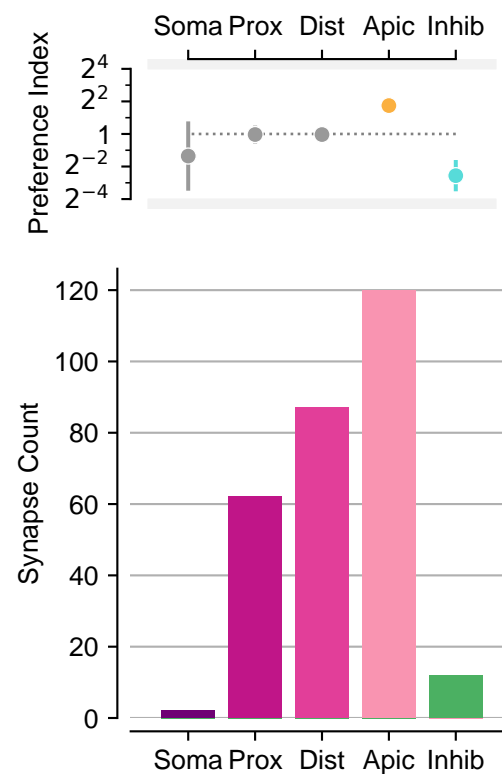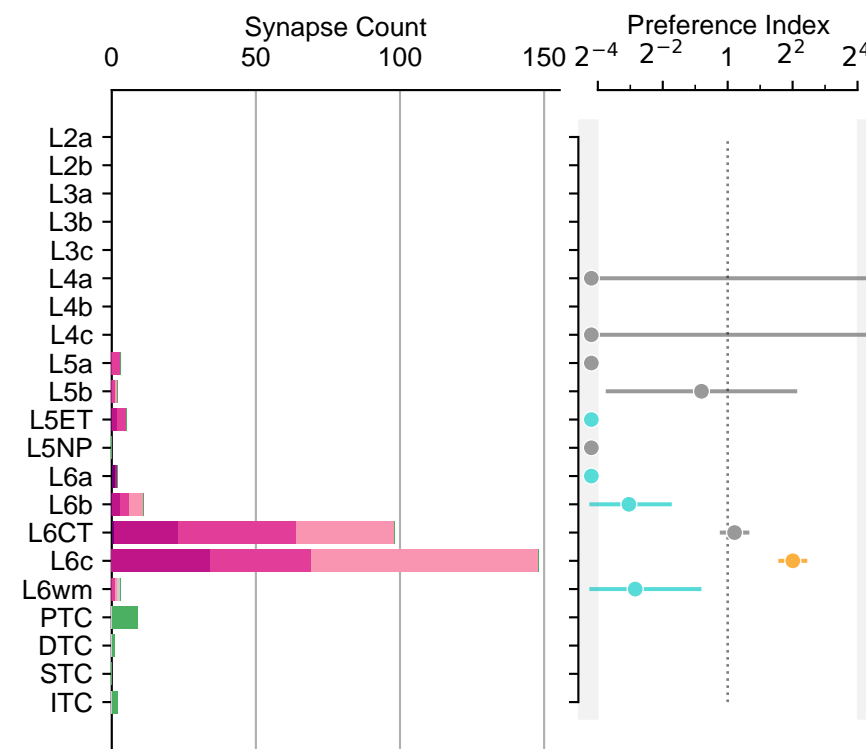

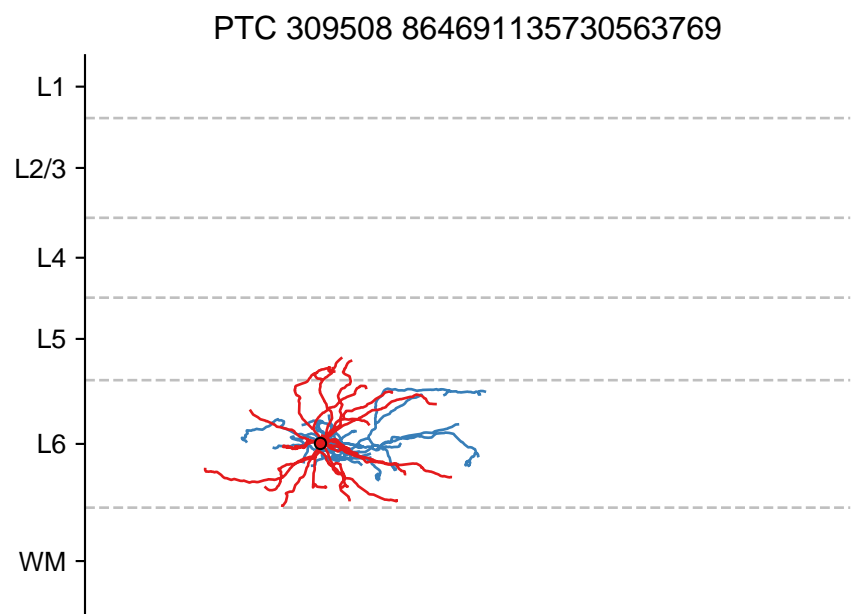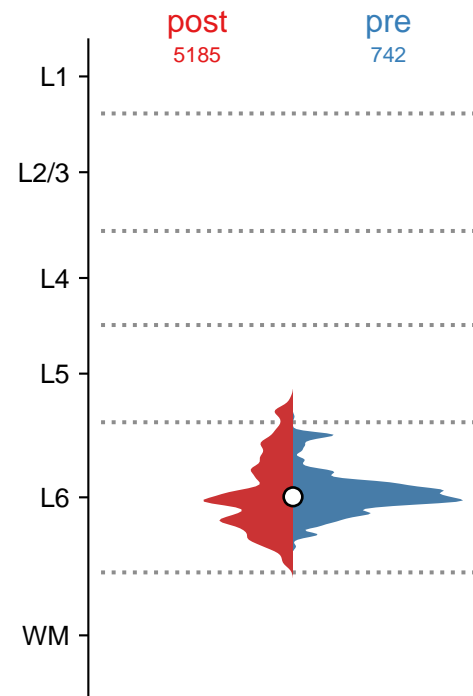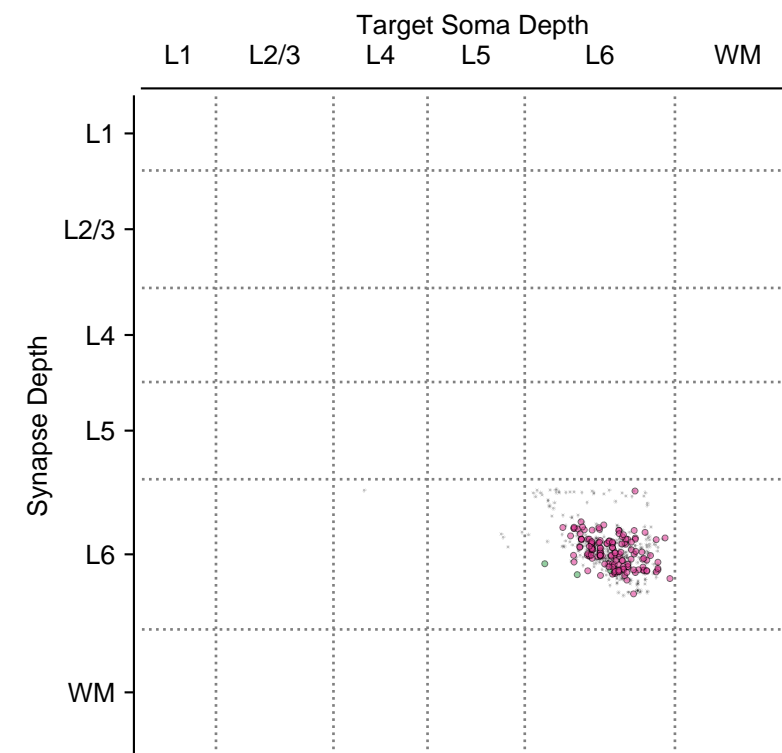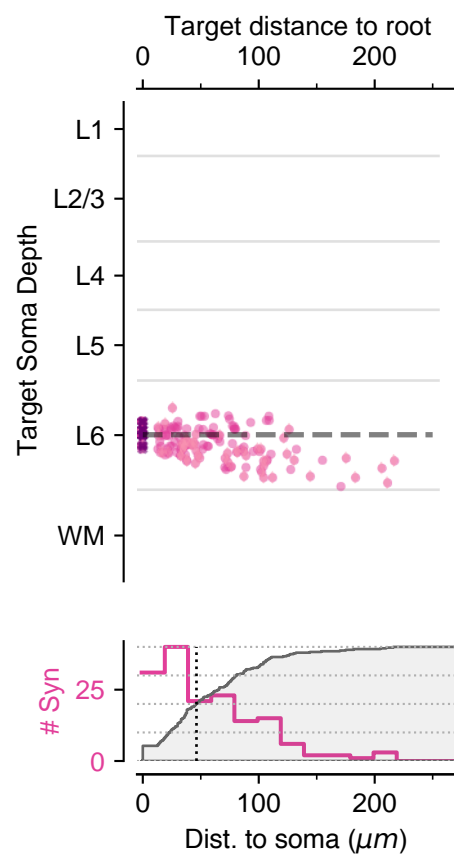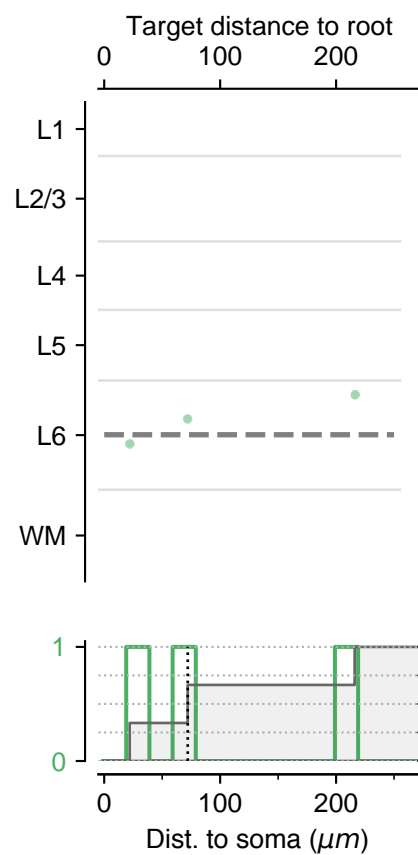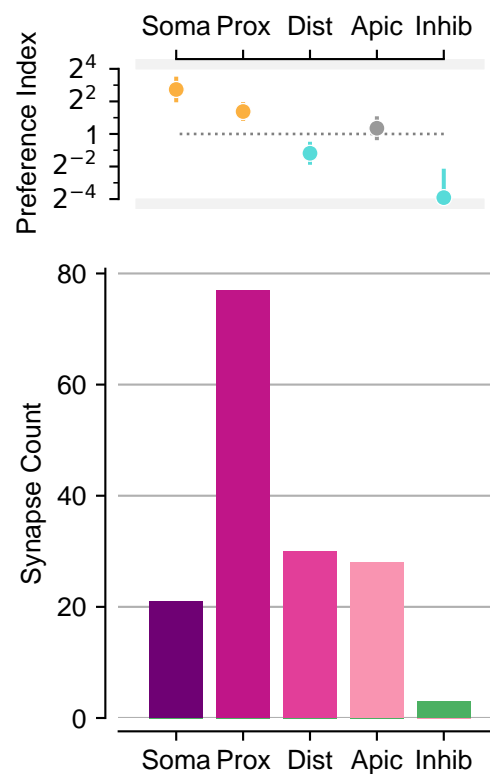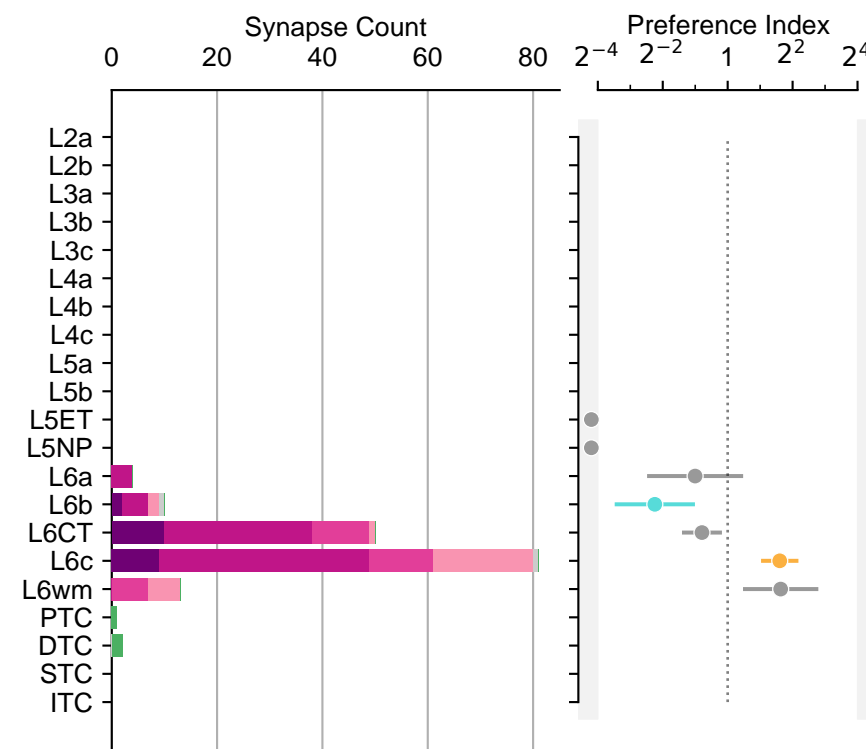

# Group 18

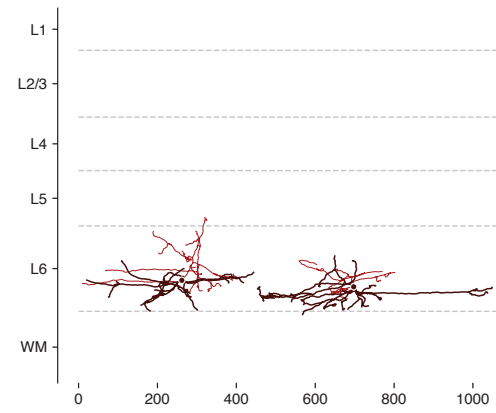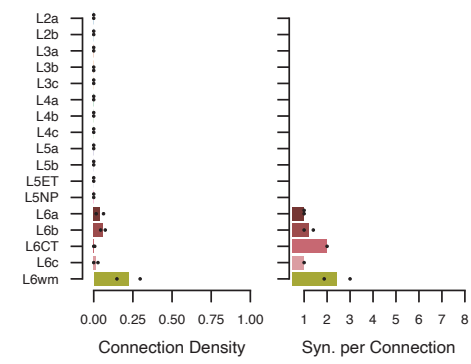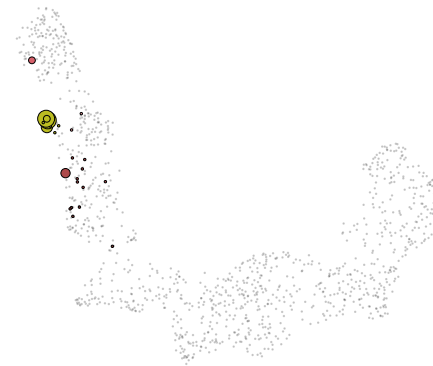

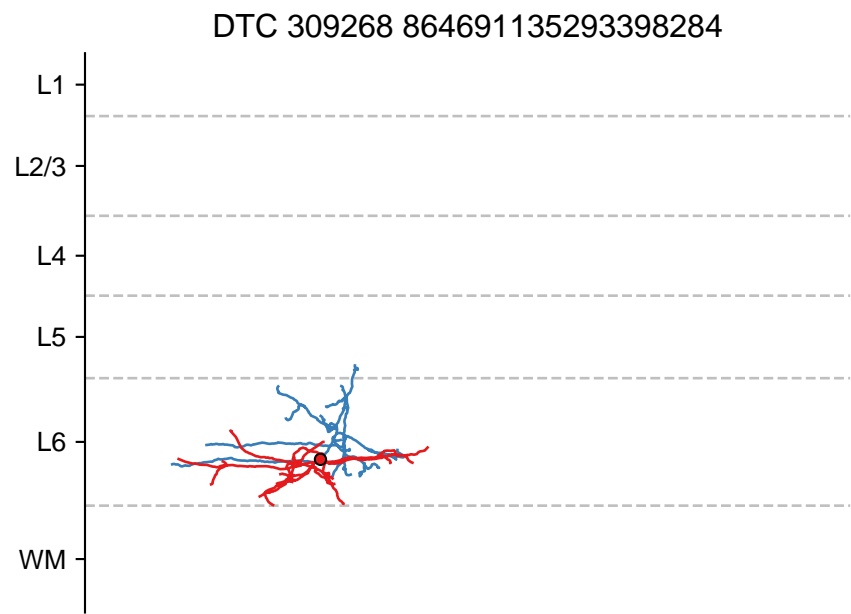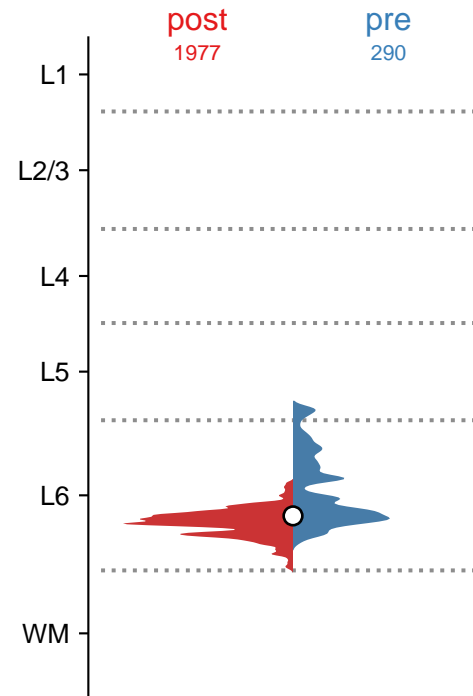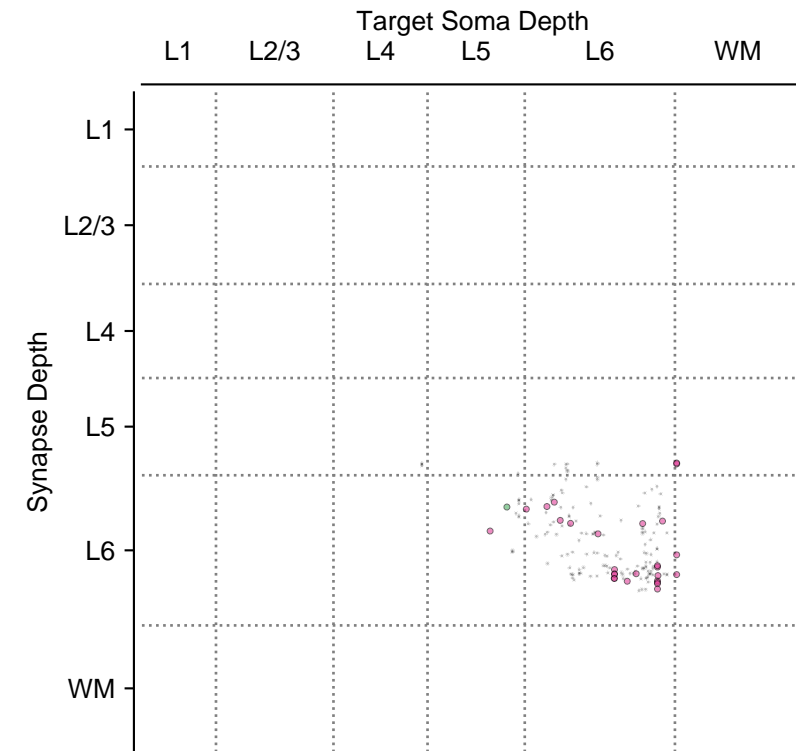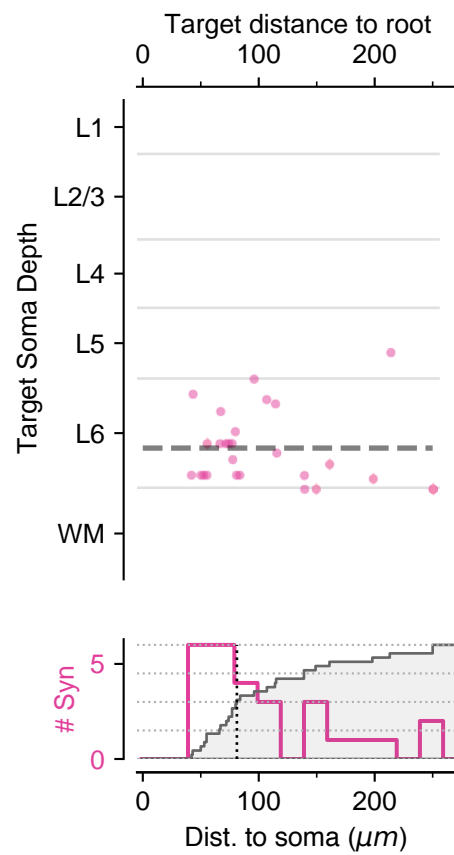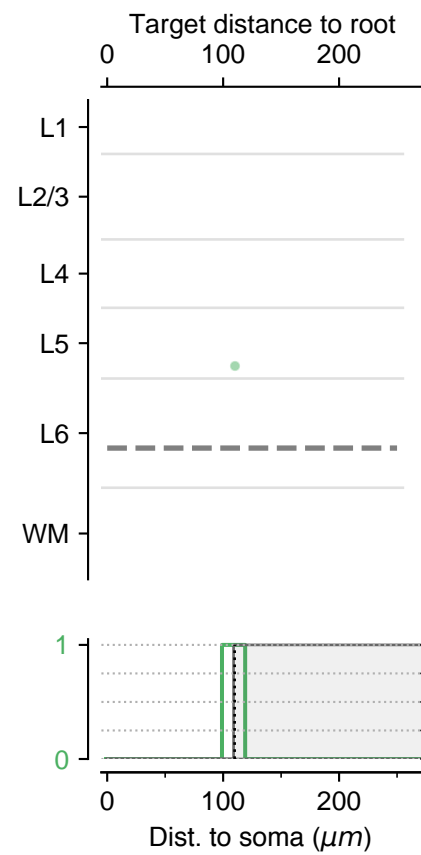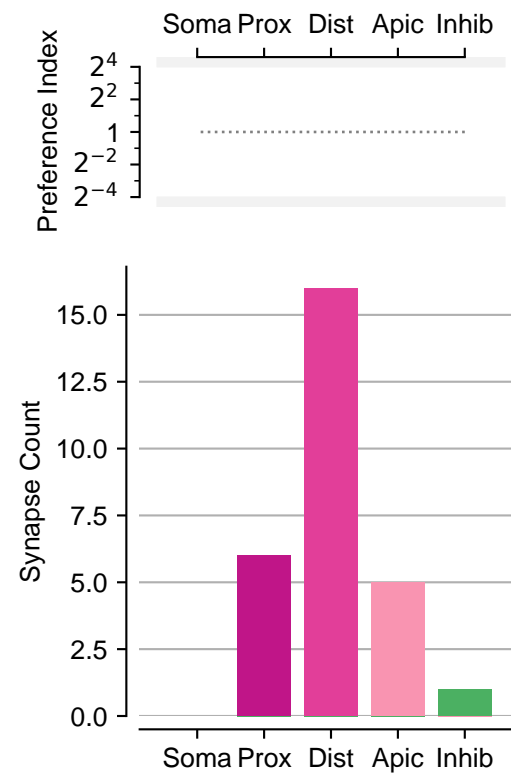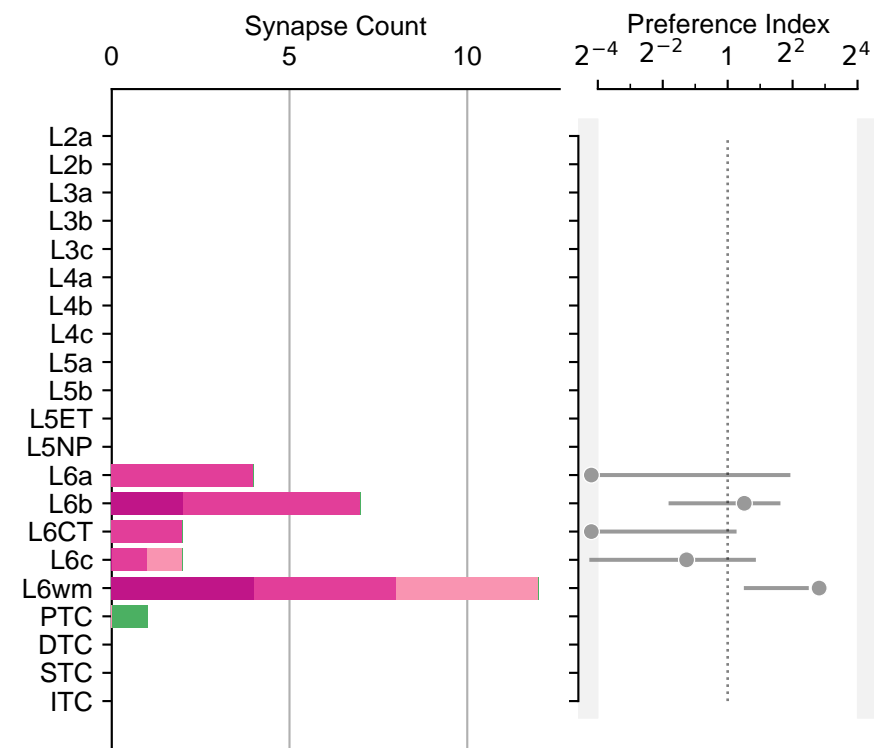

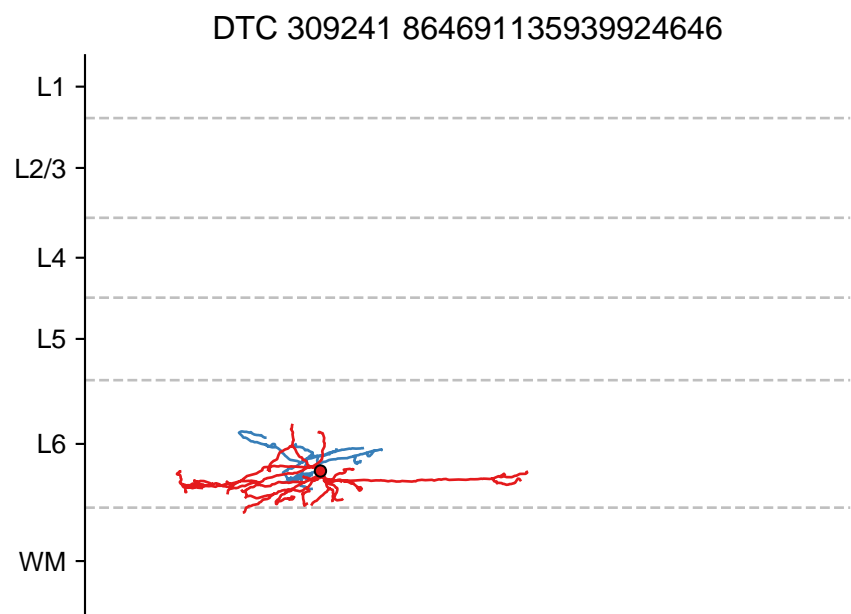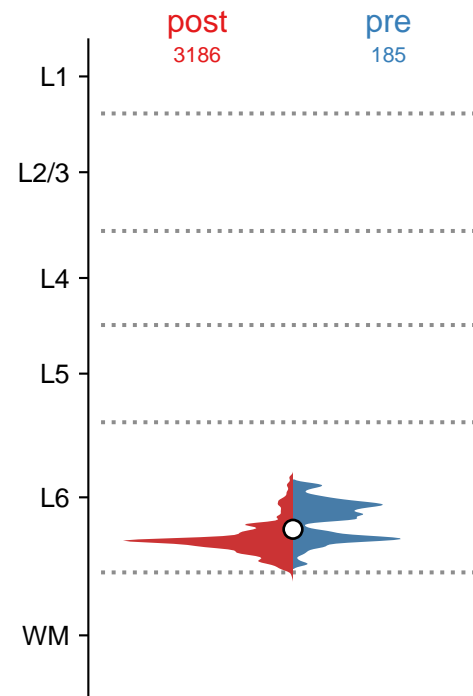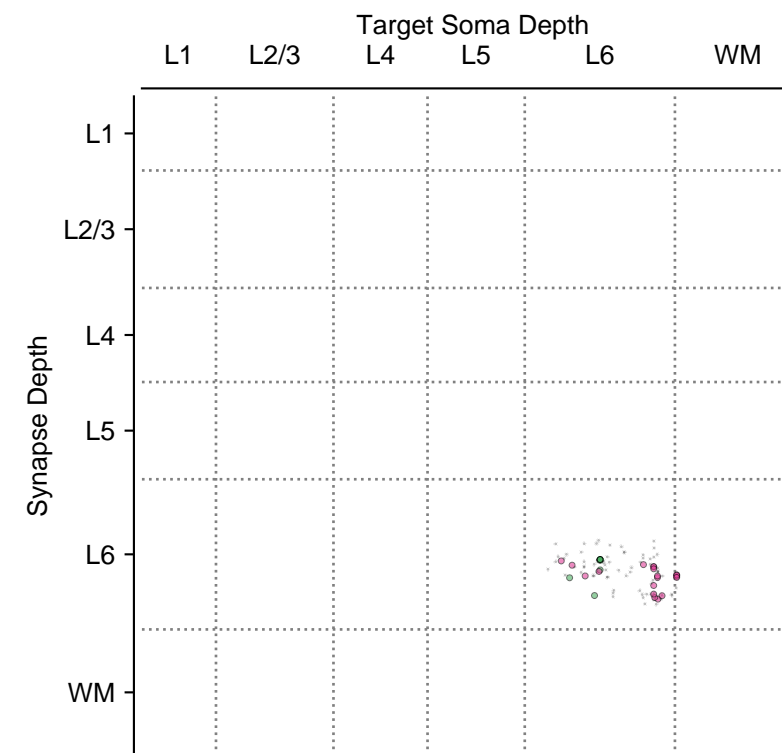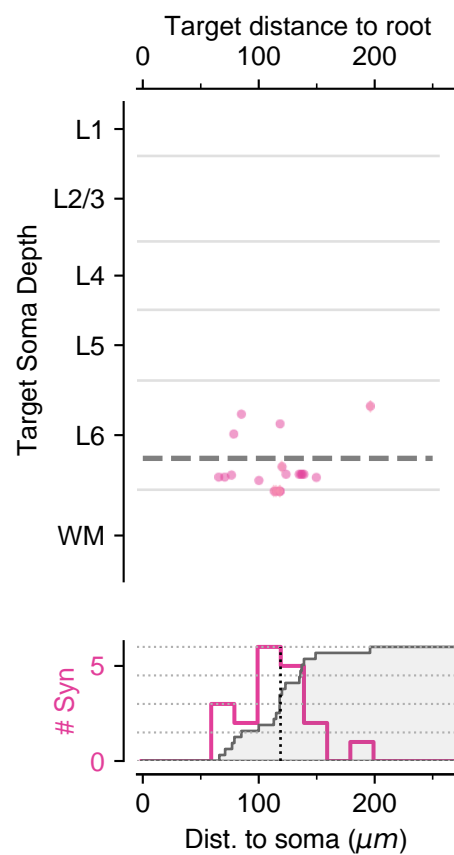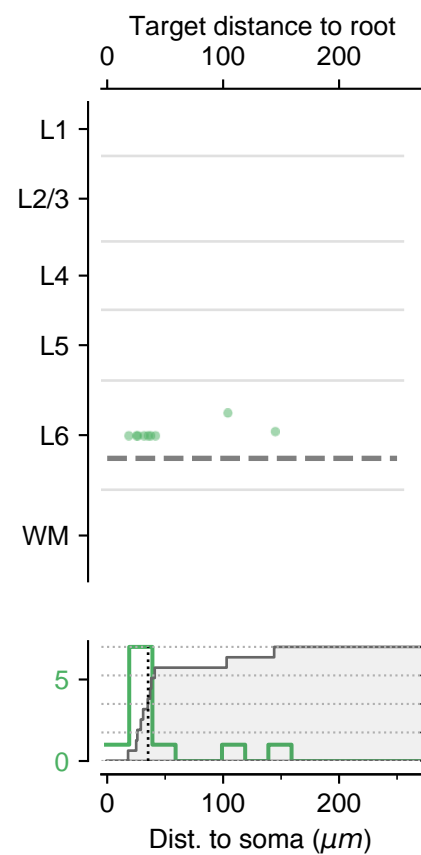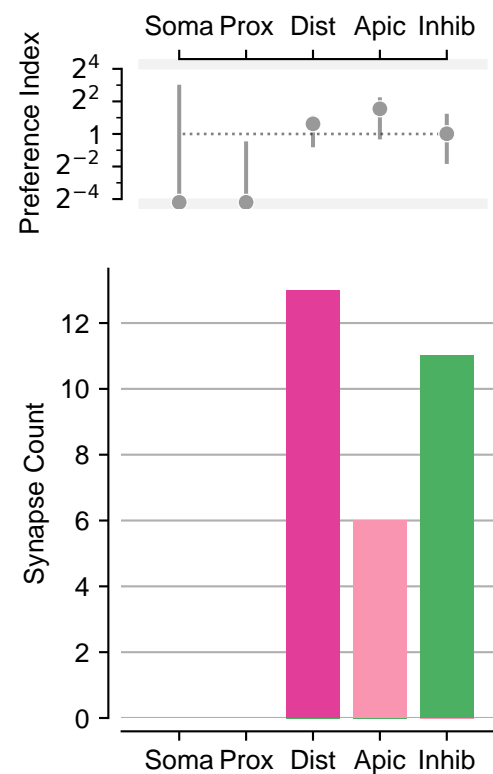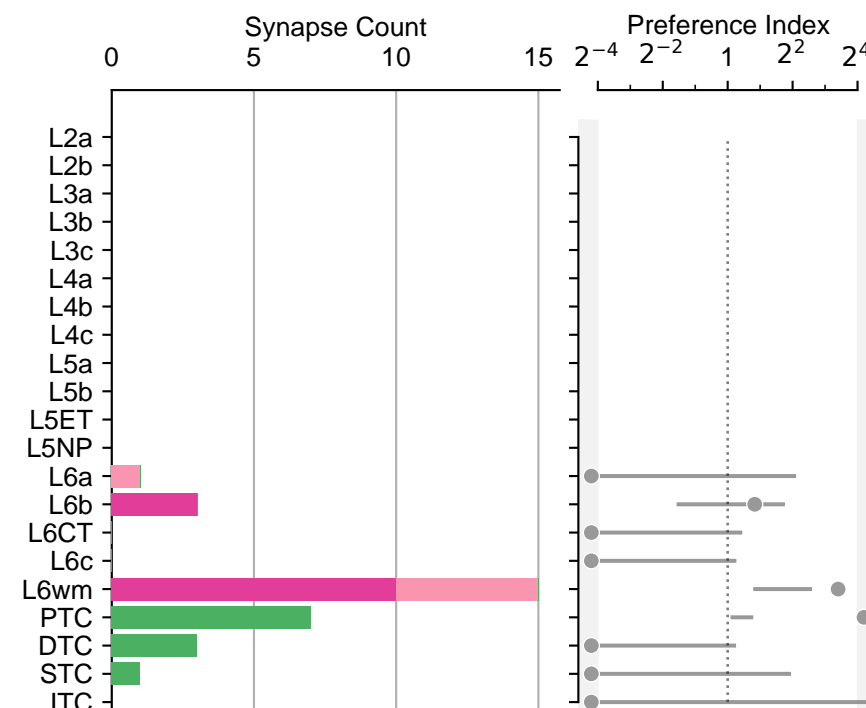

# Group 19 (InhTC<sup>dist</sup>)

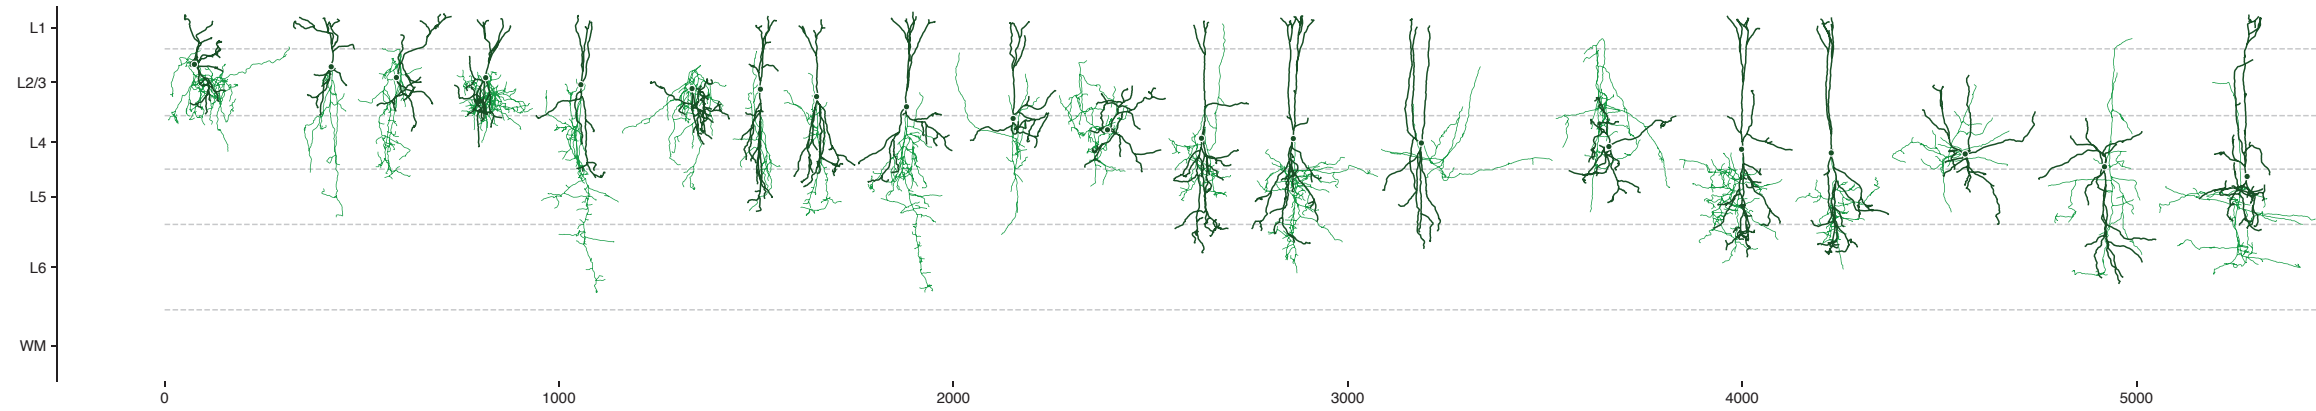

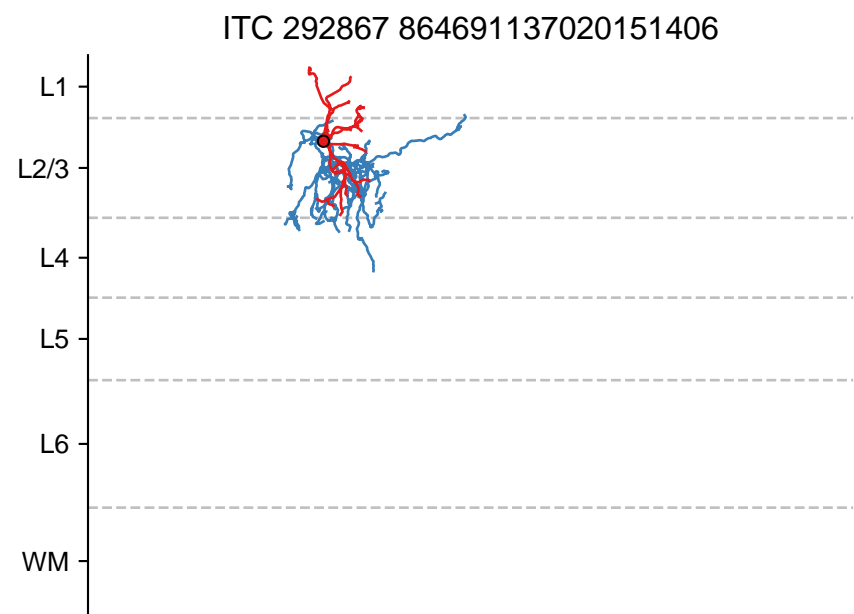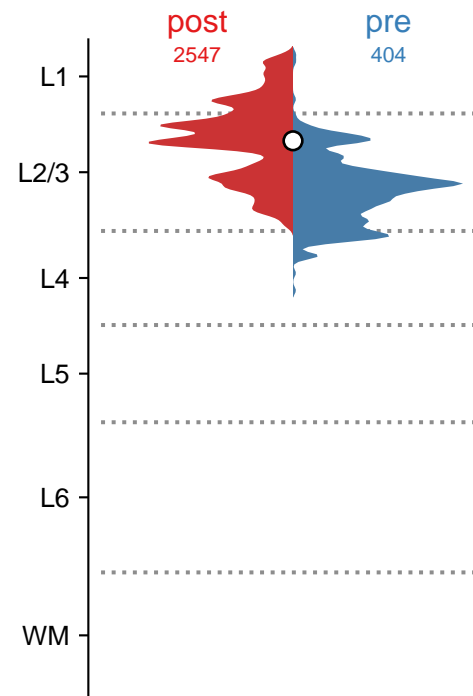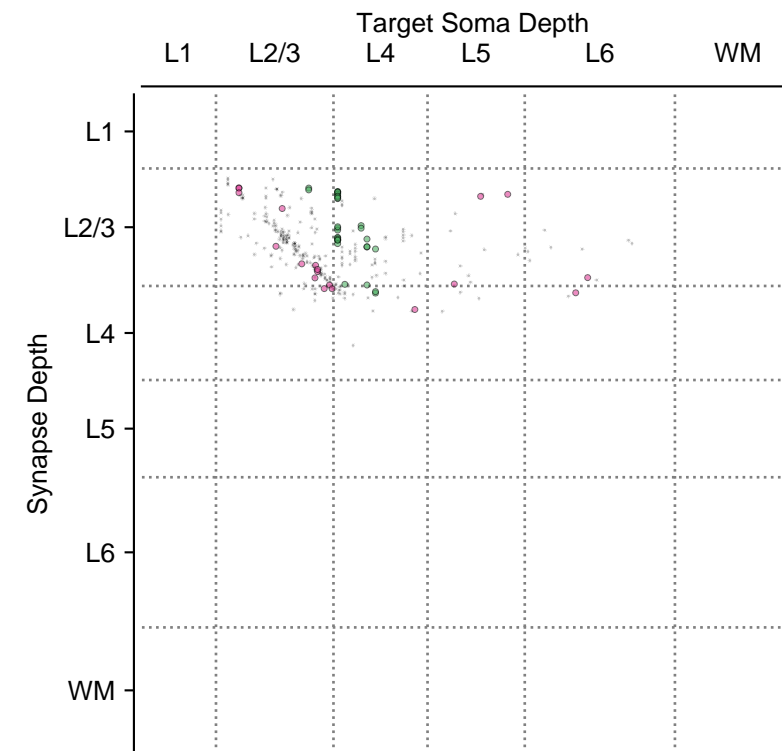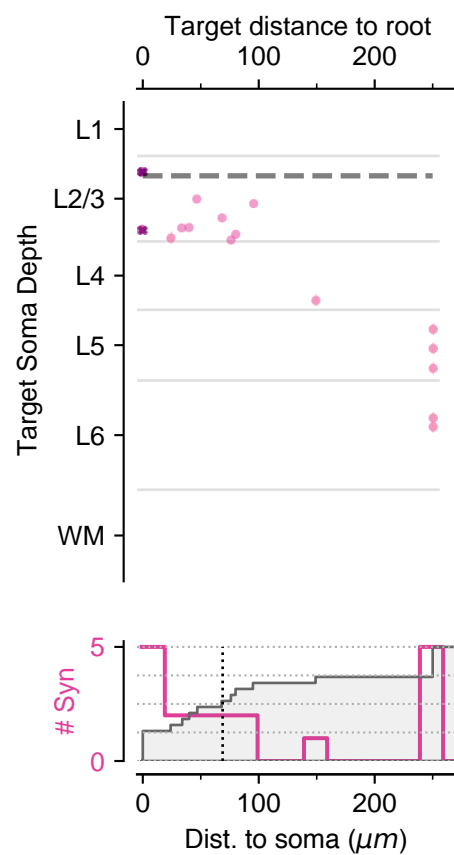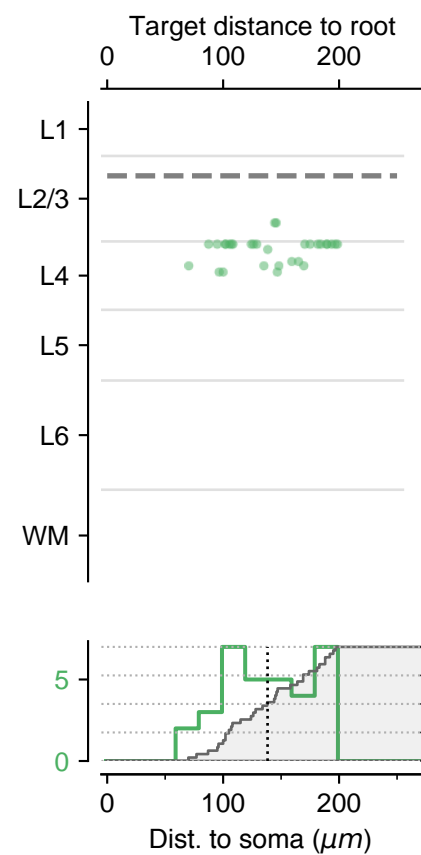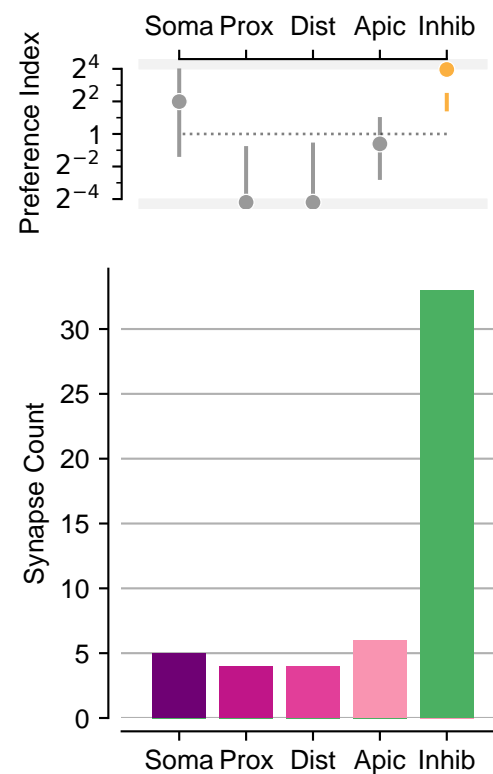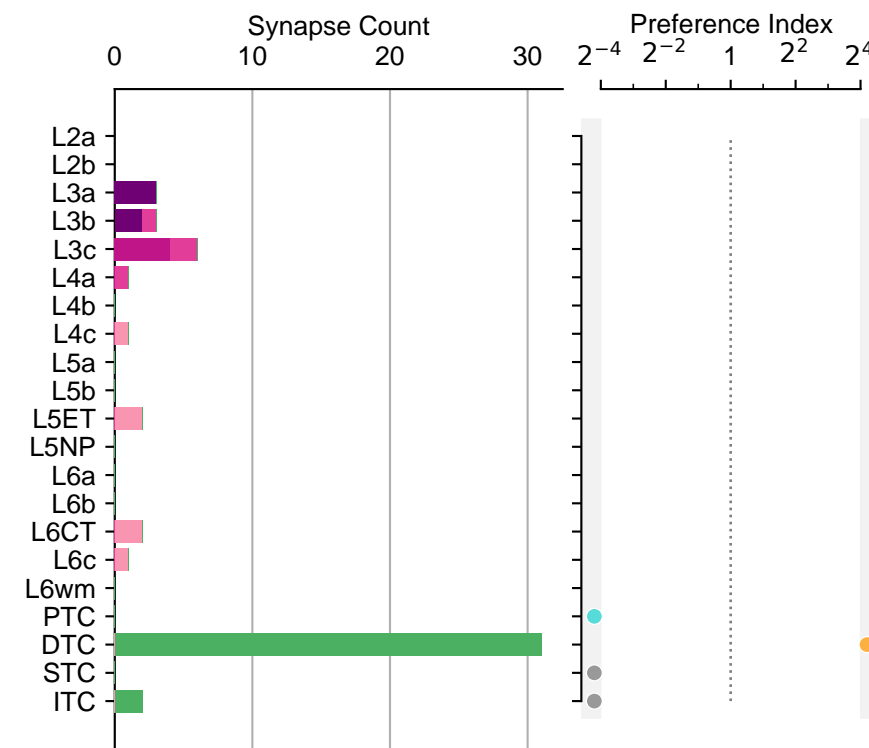



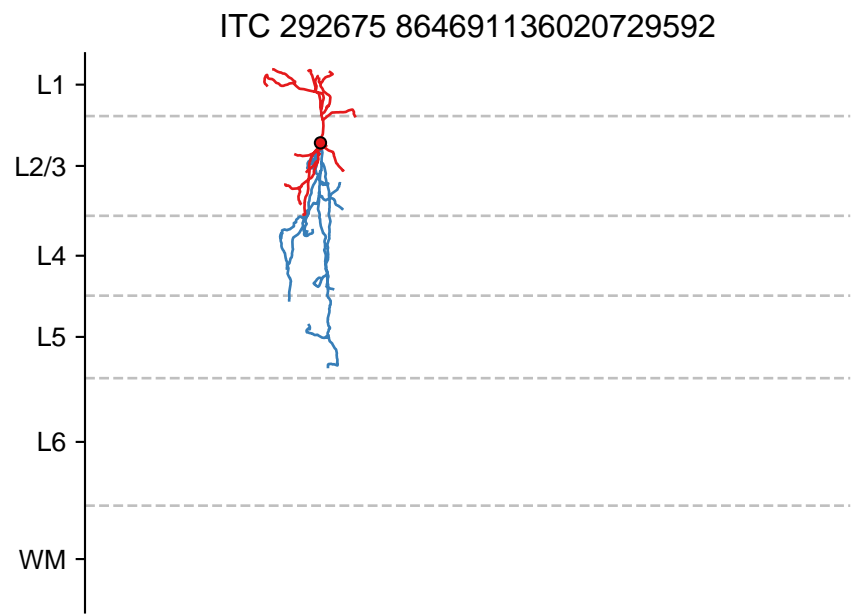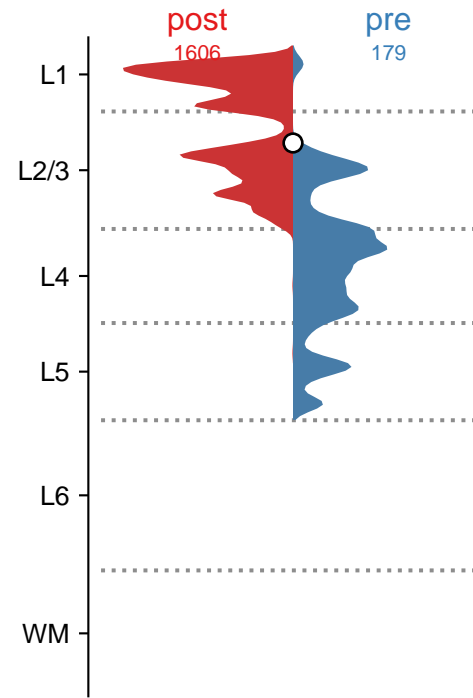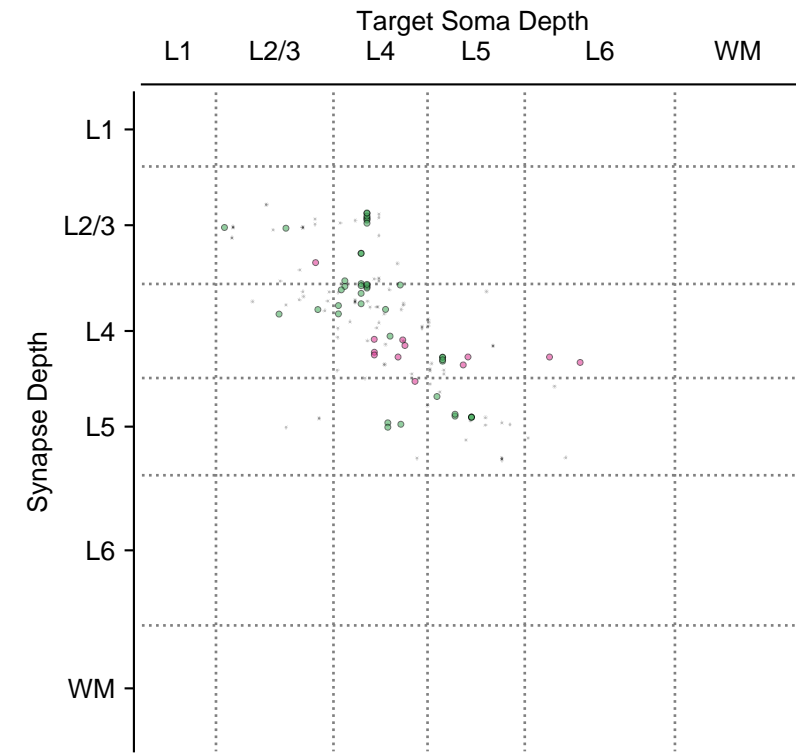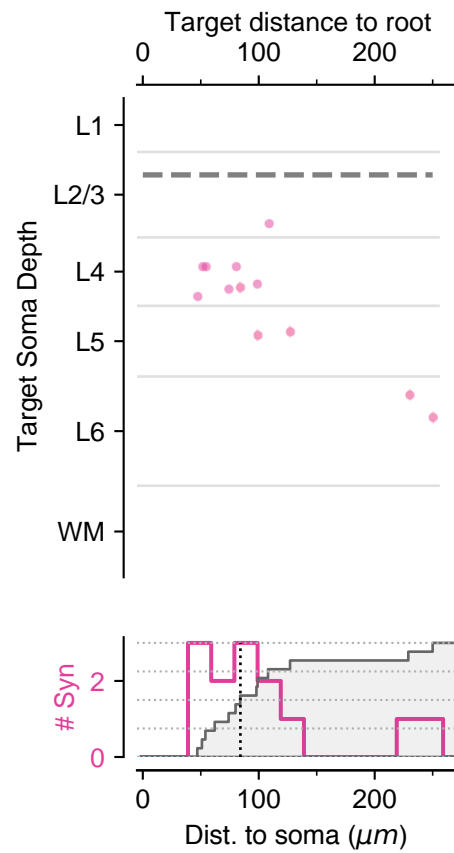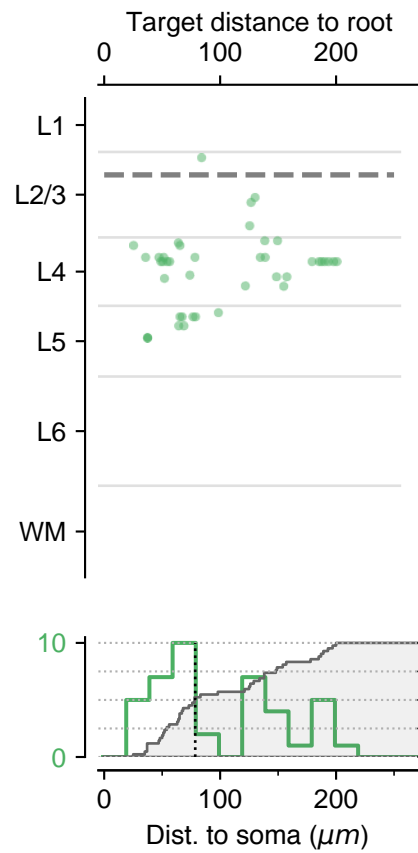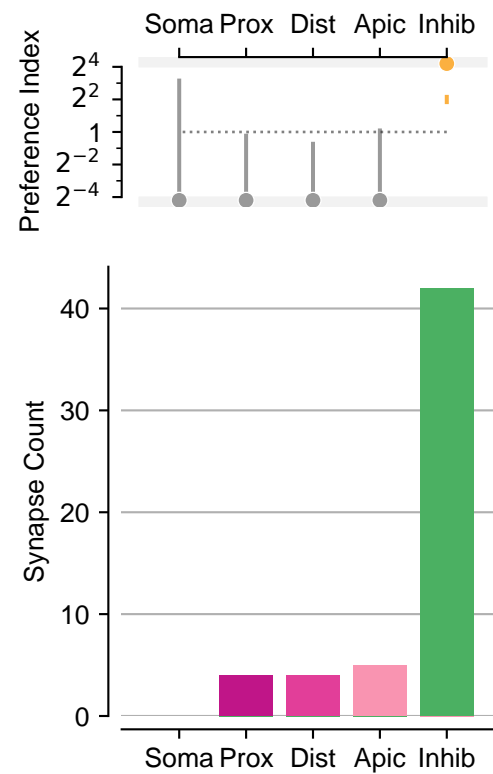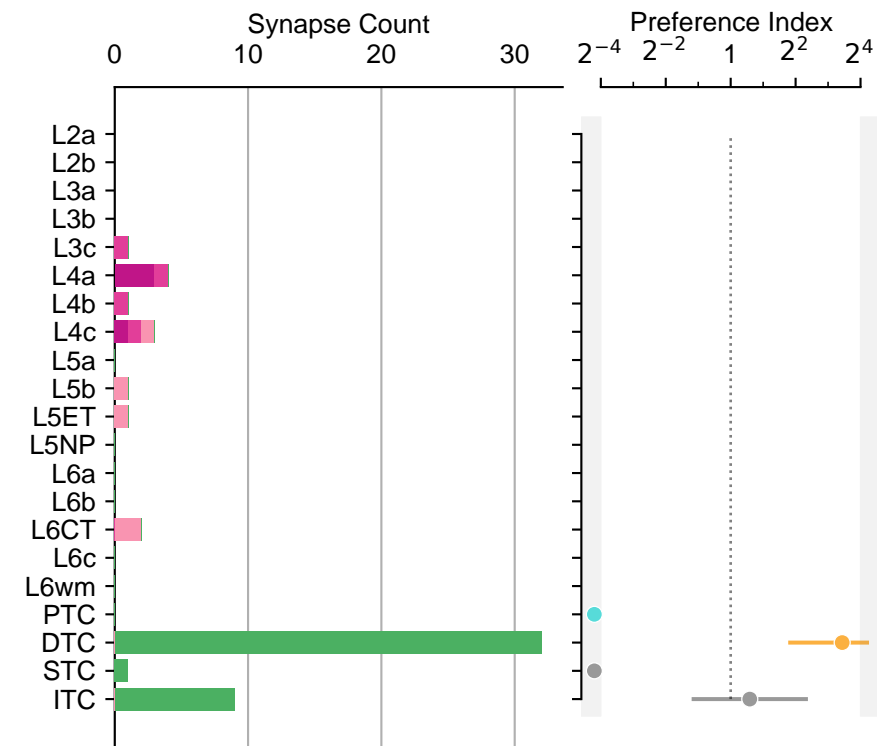

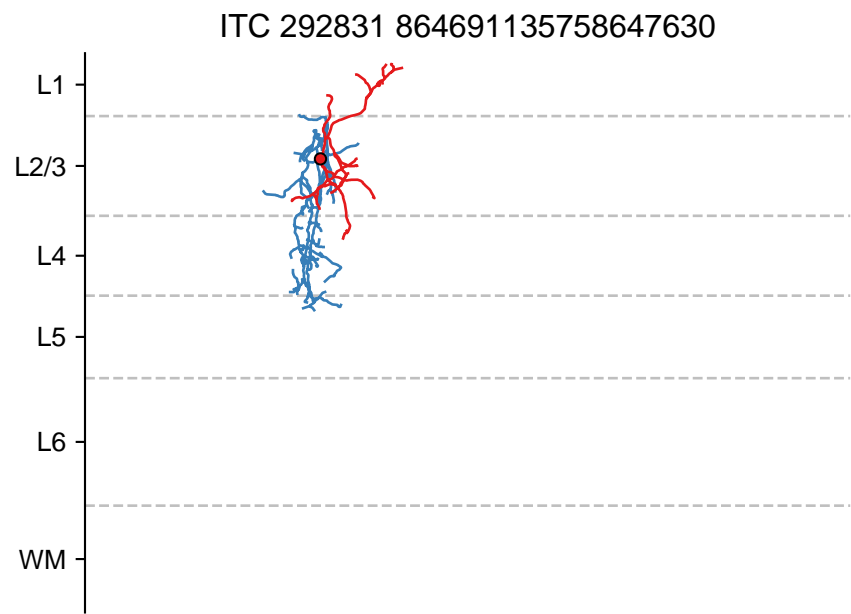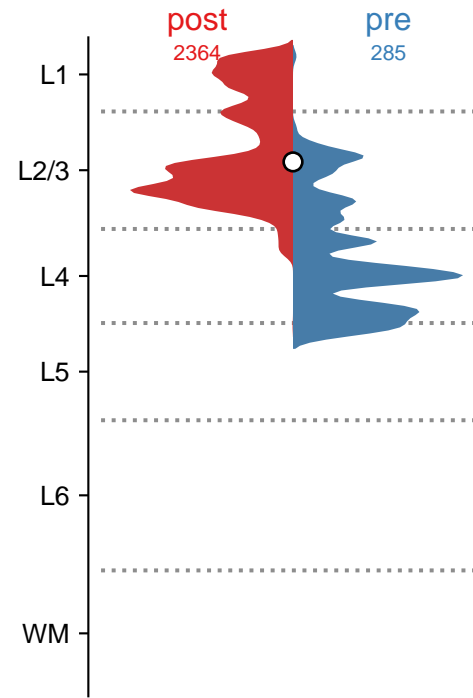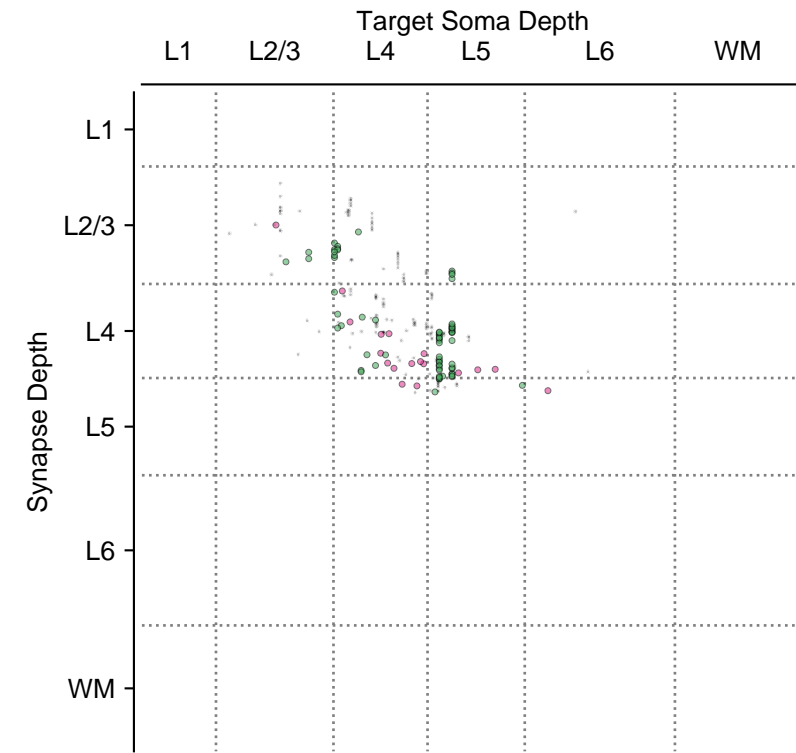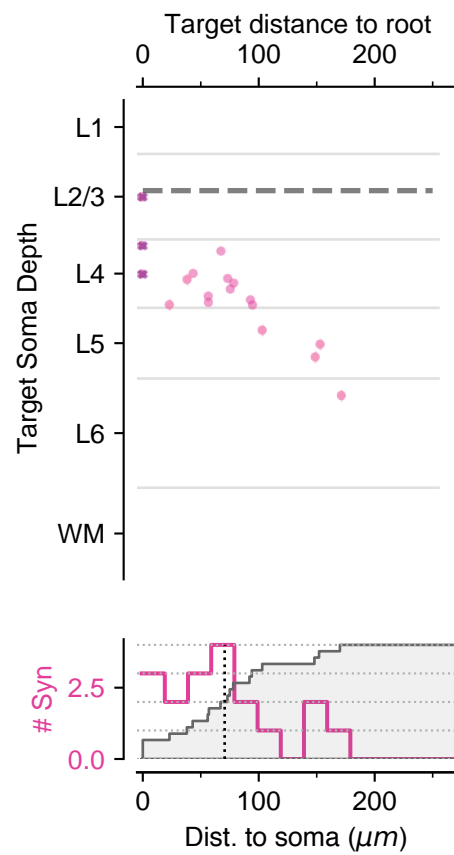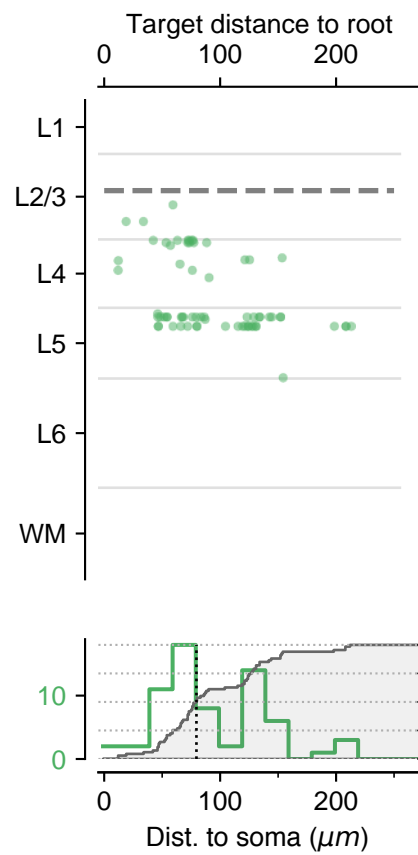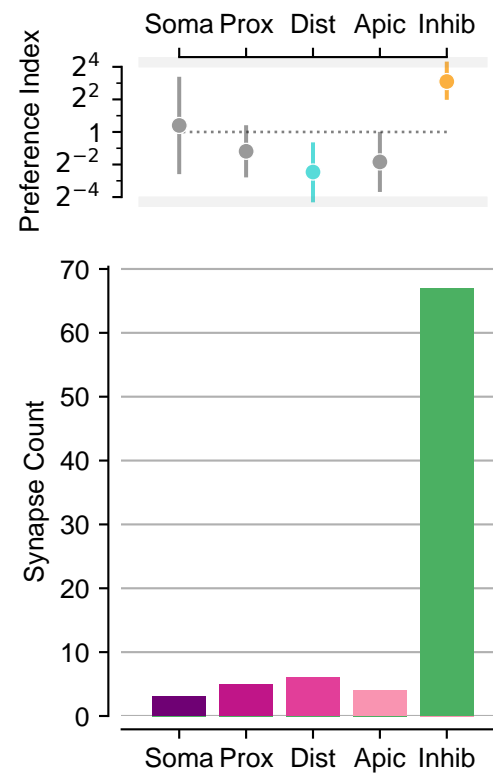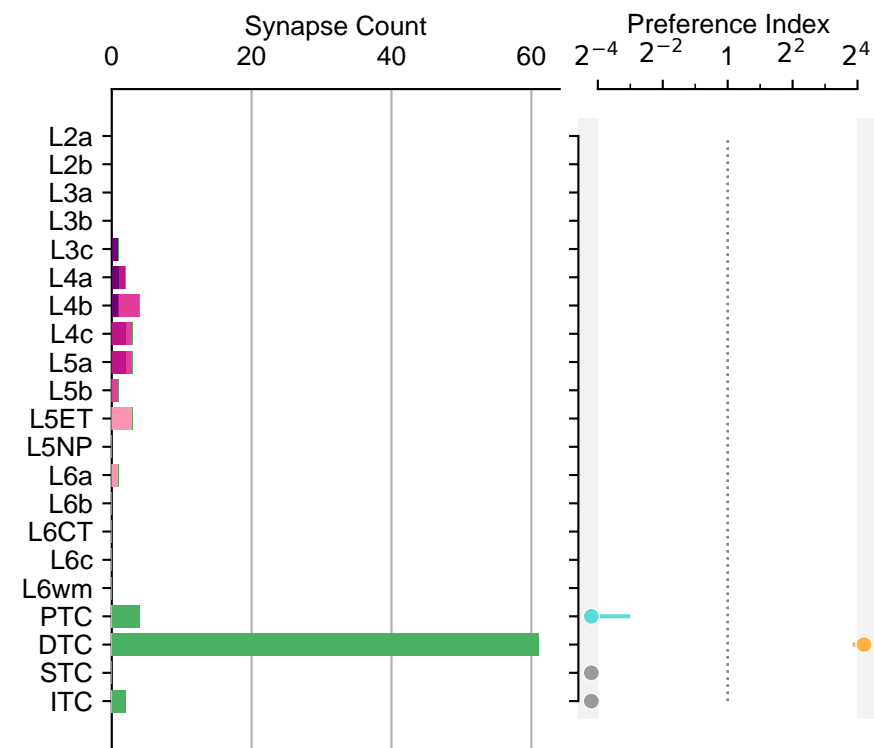

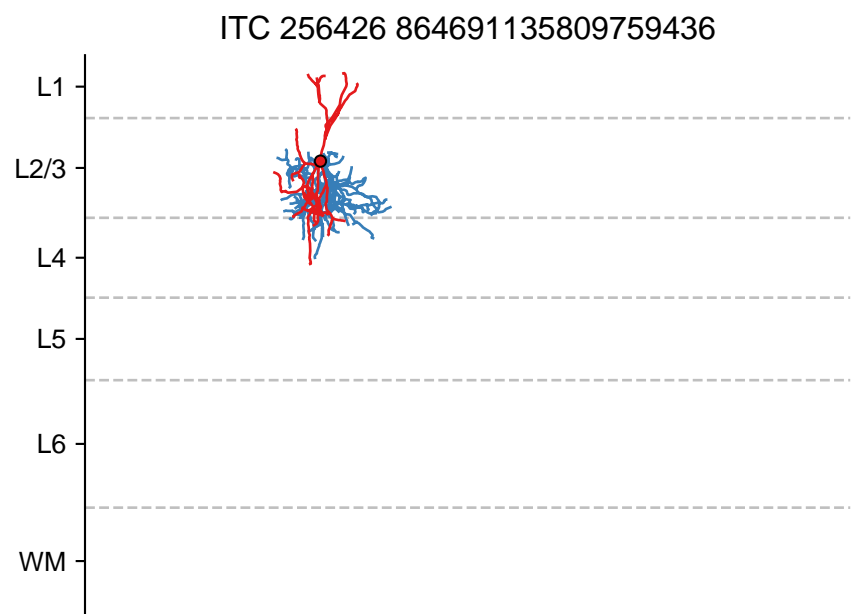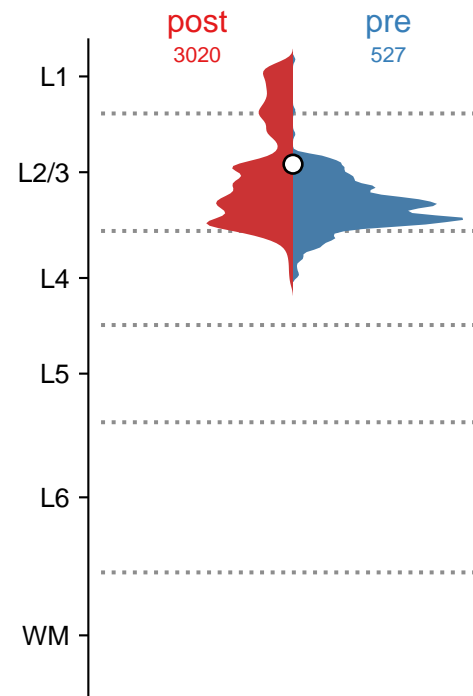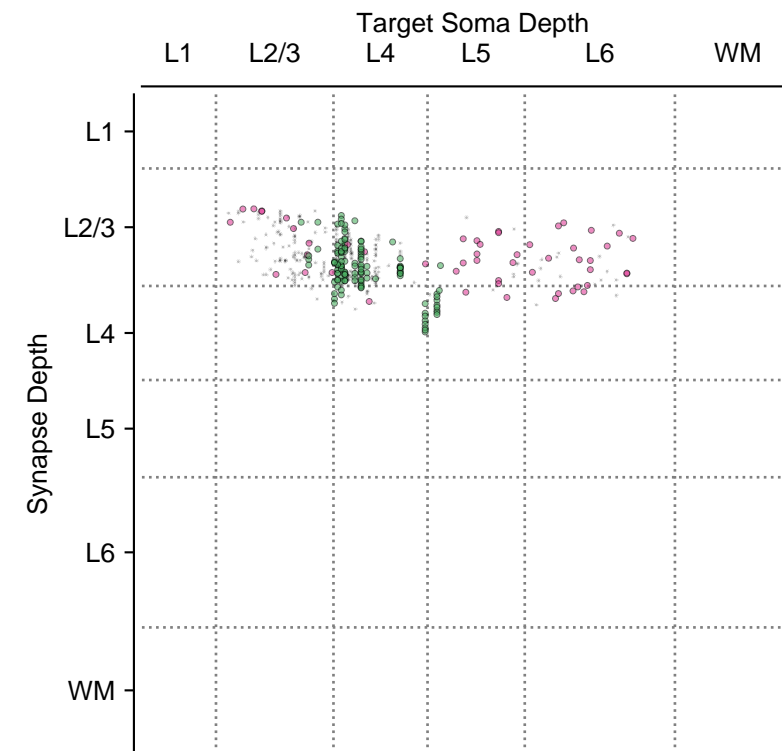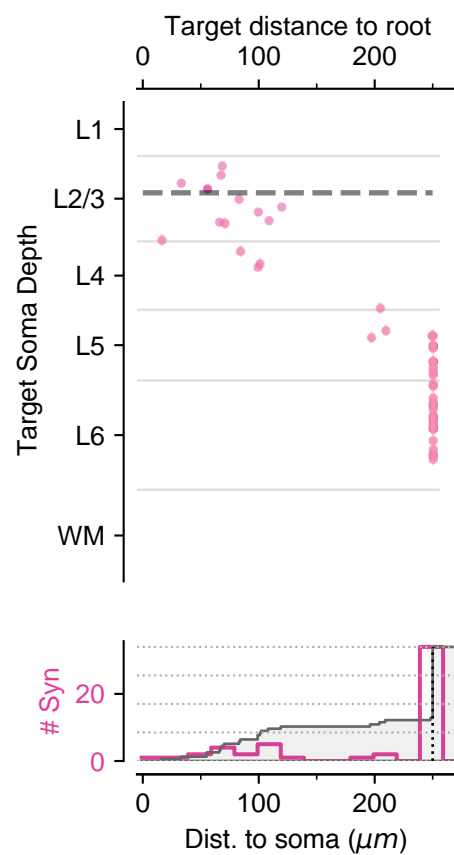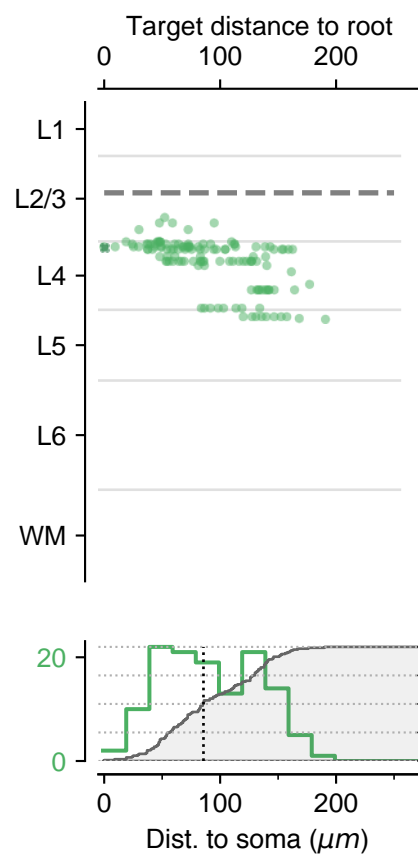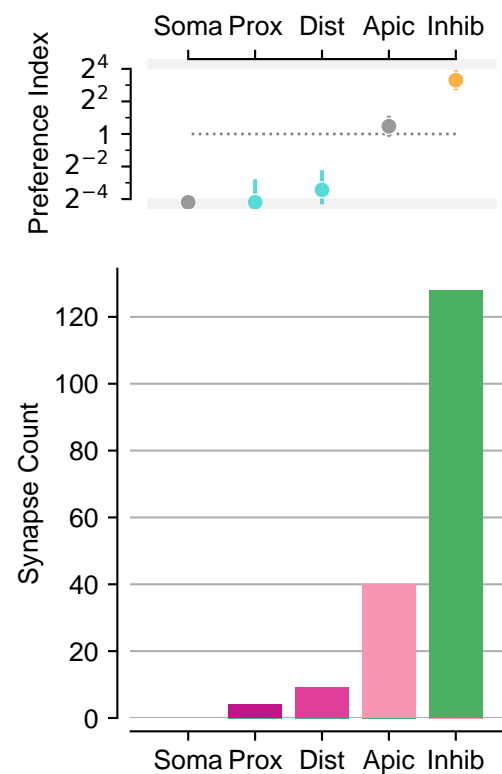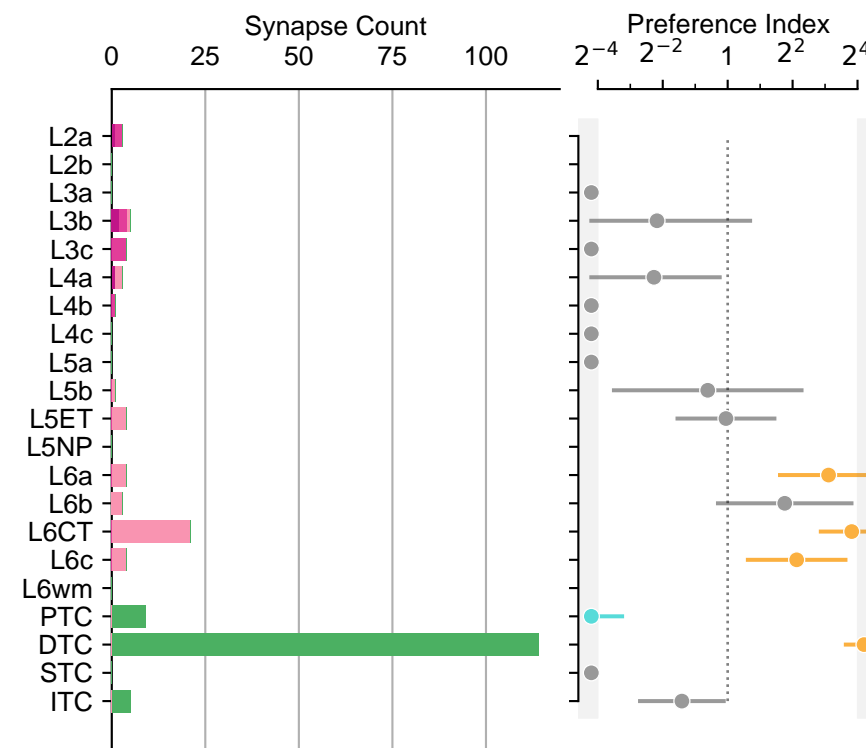

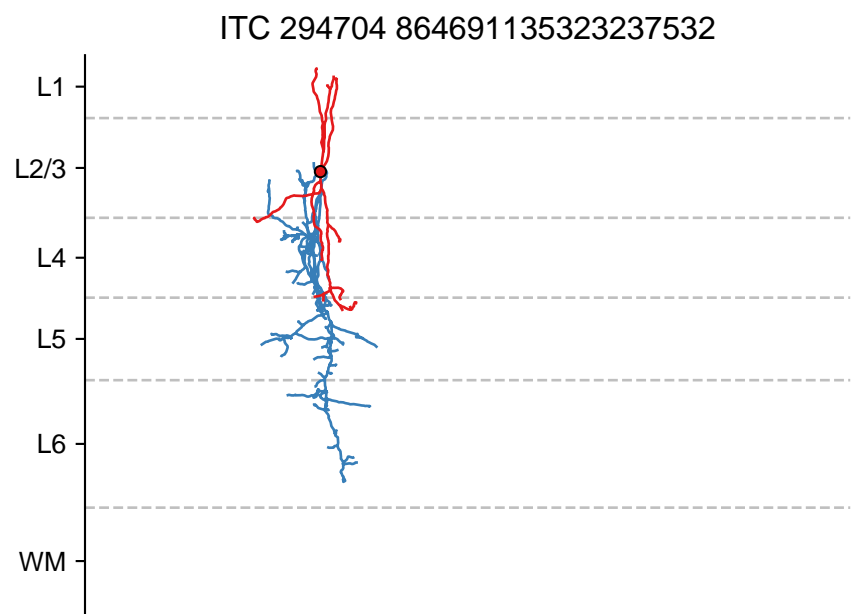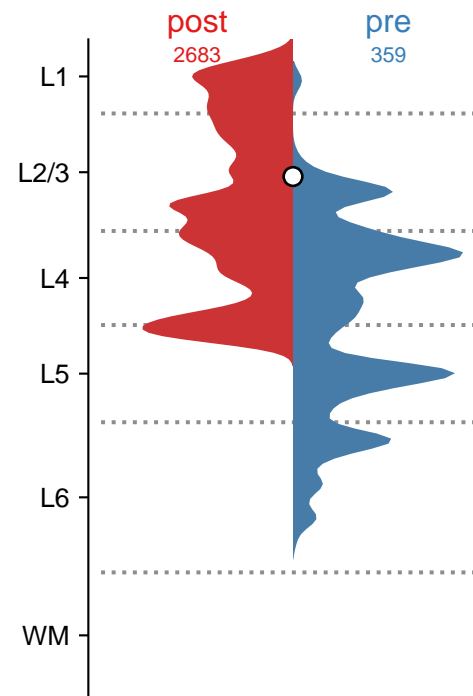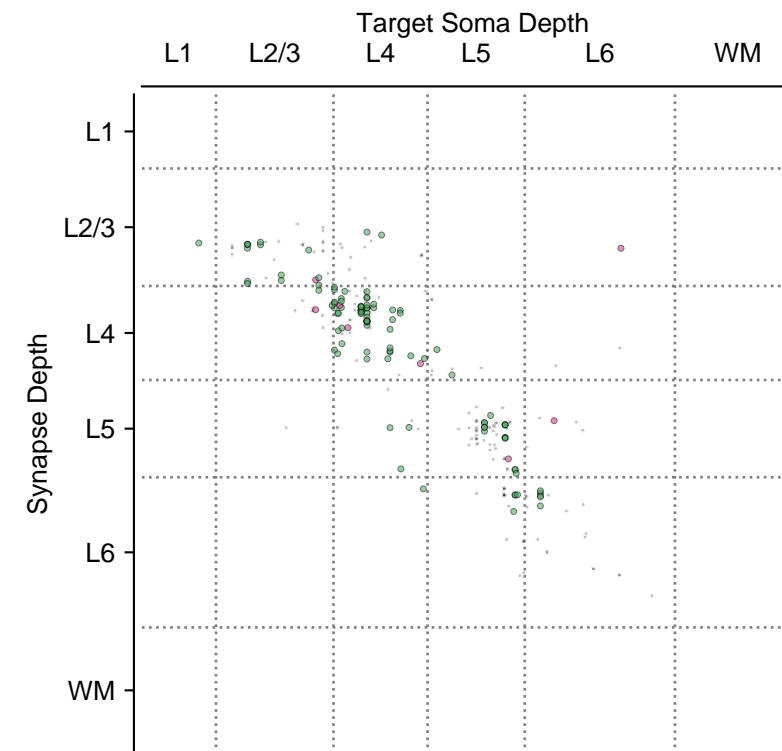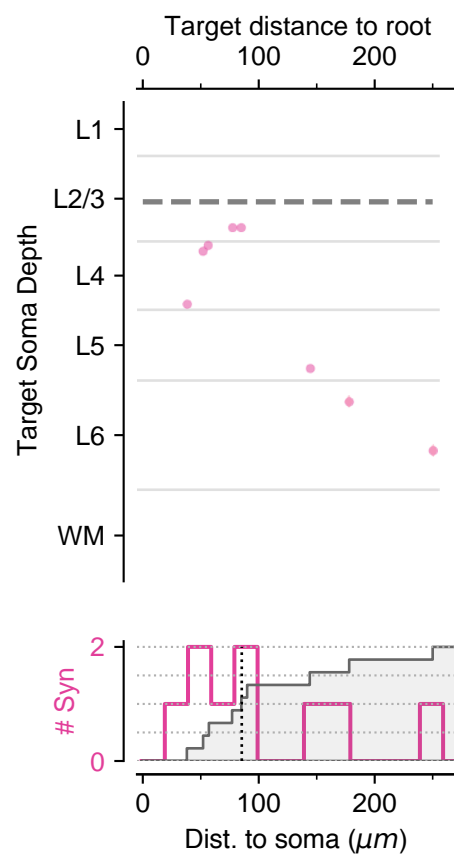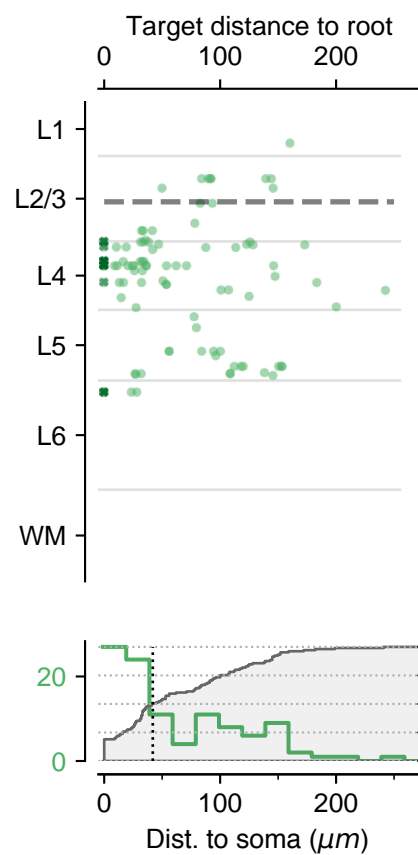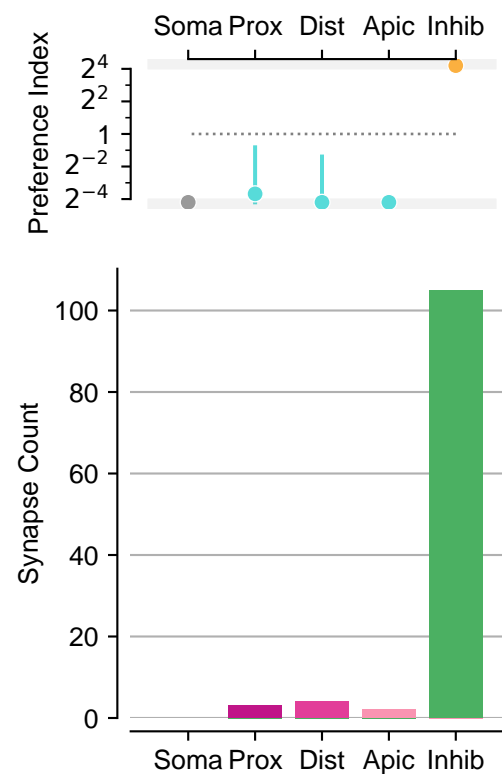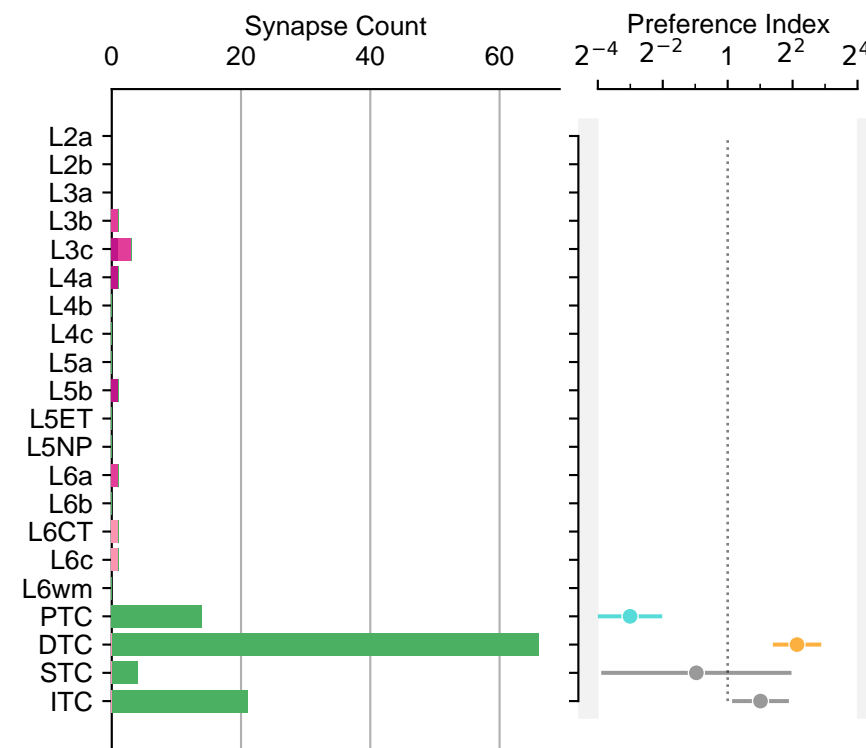

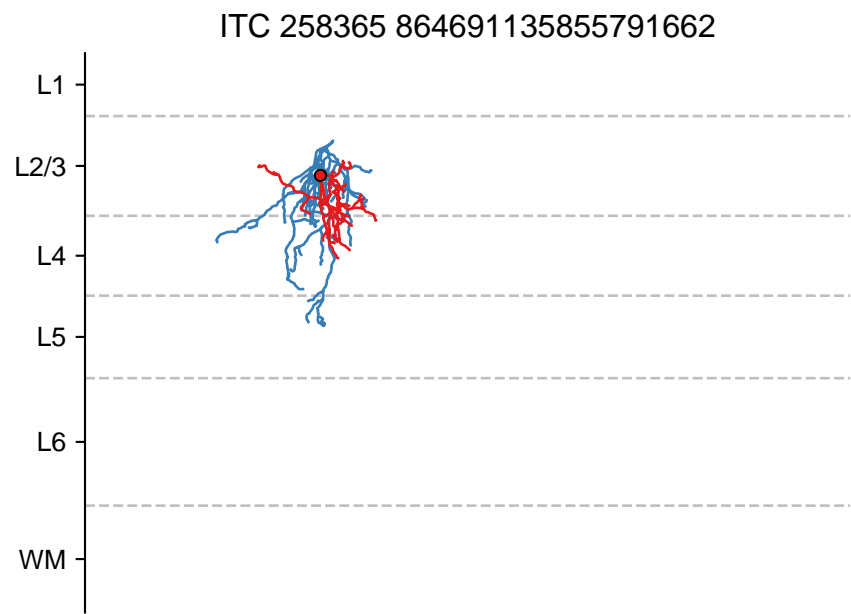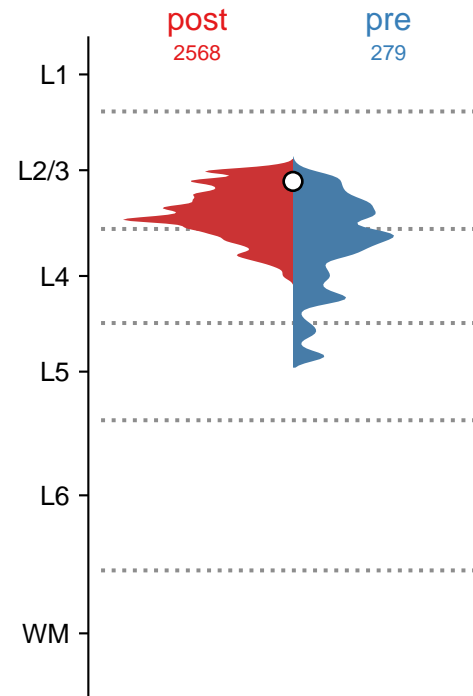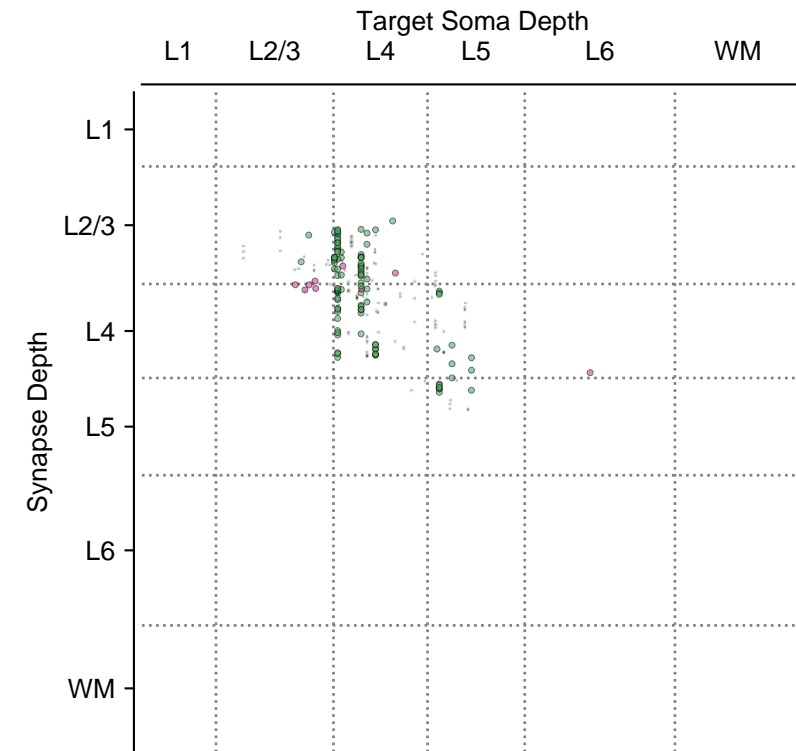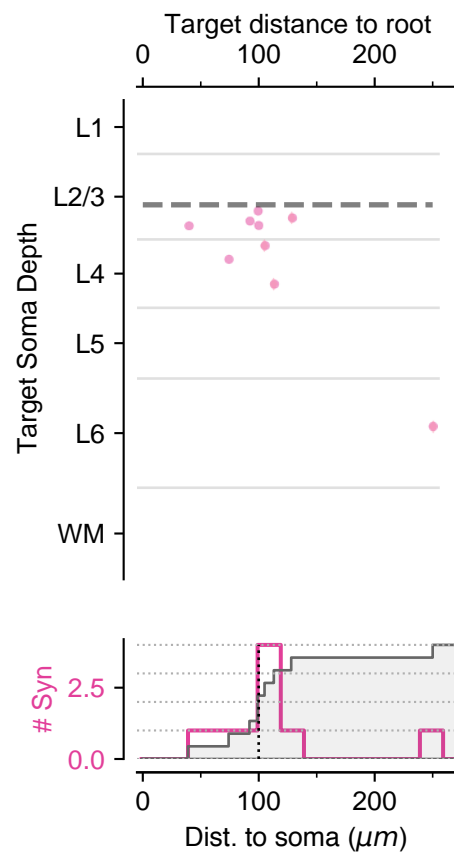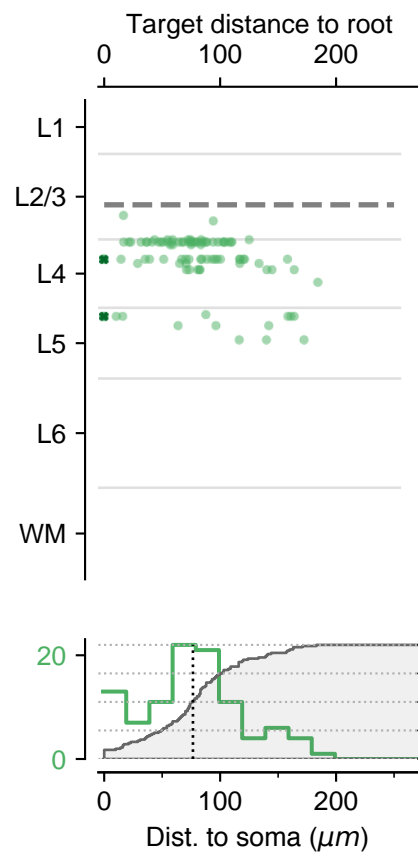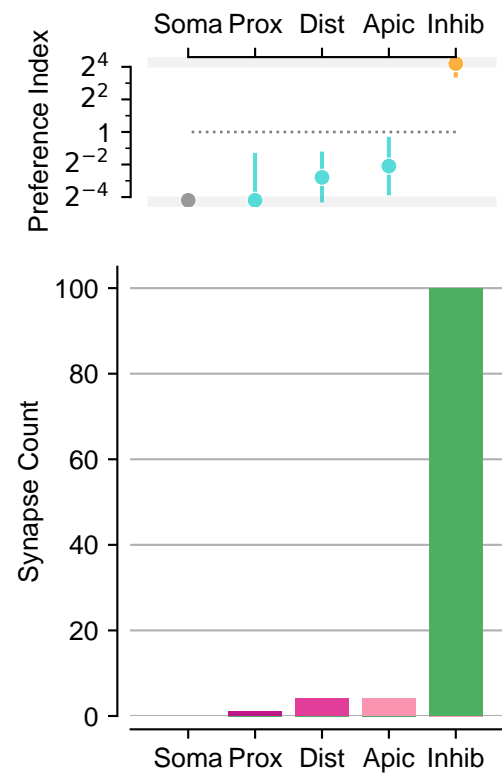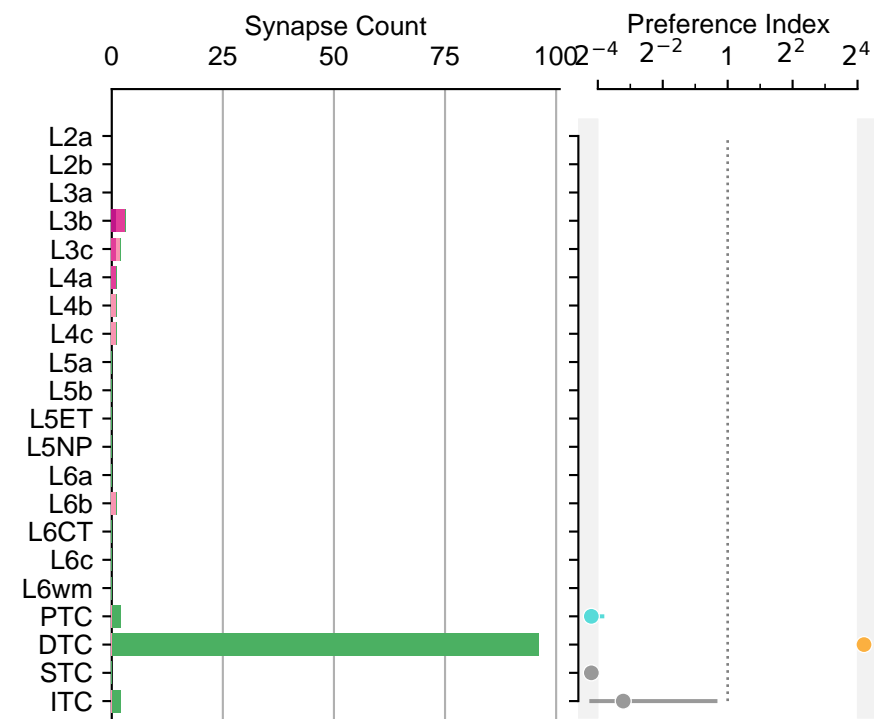

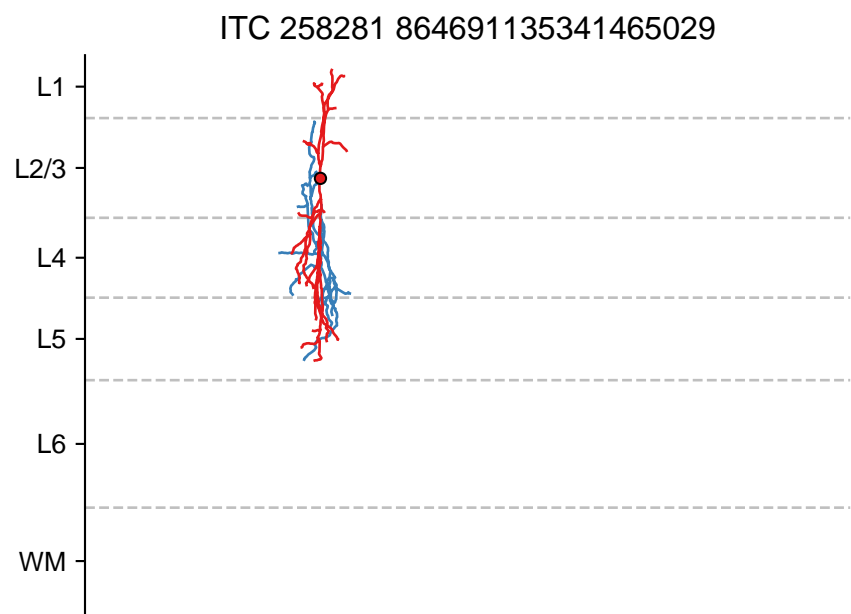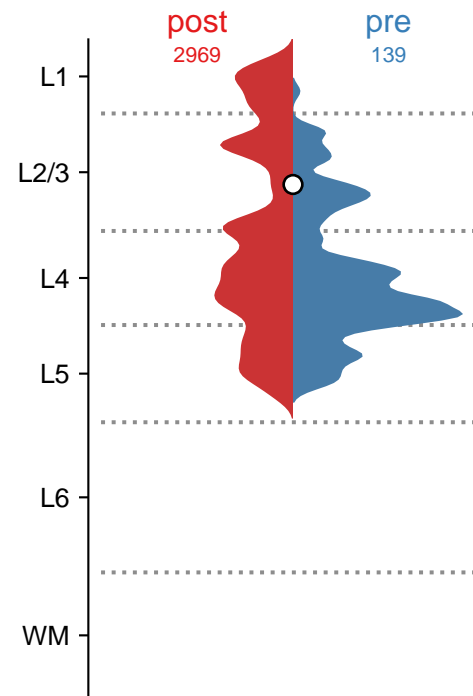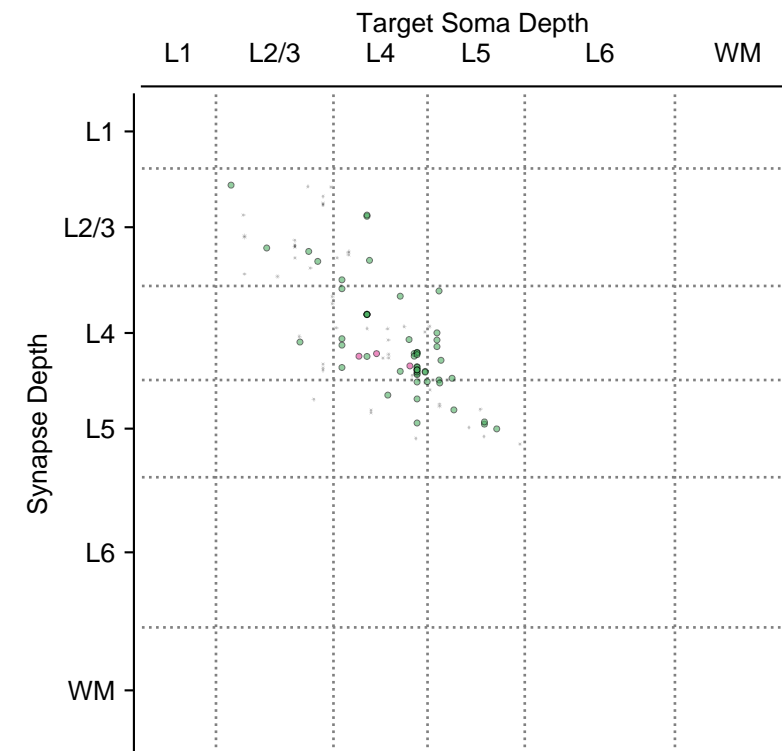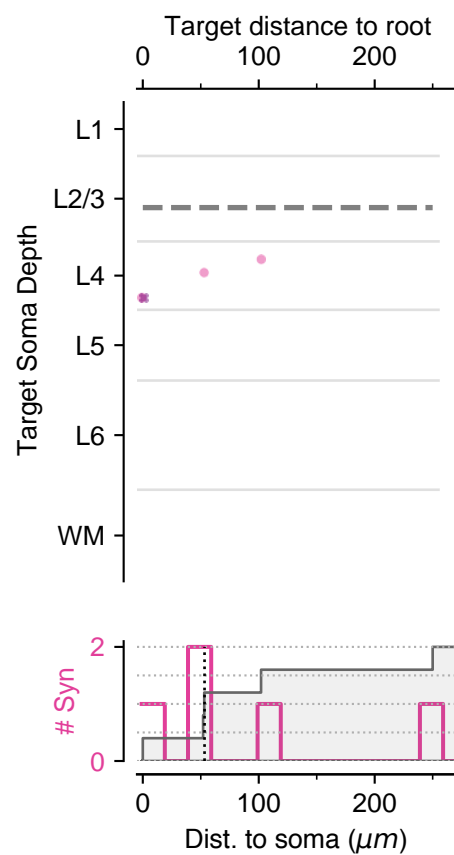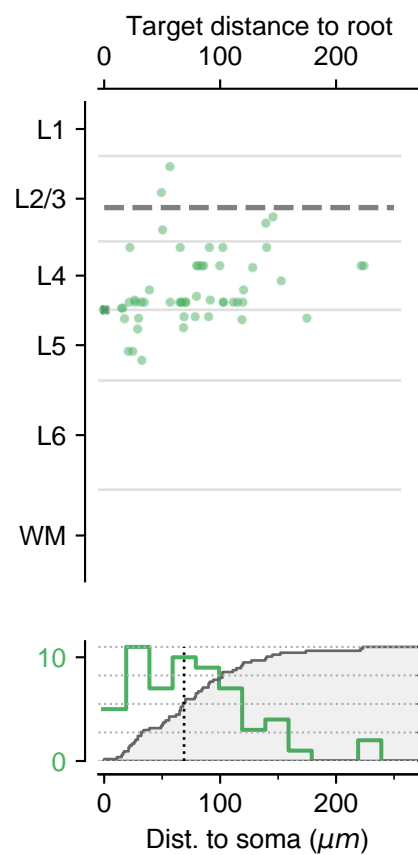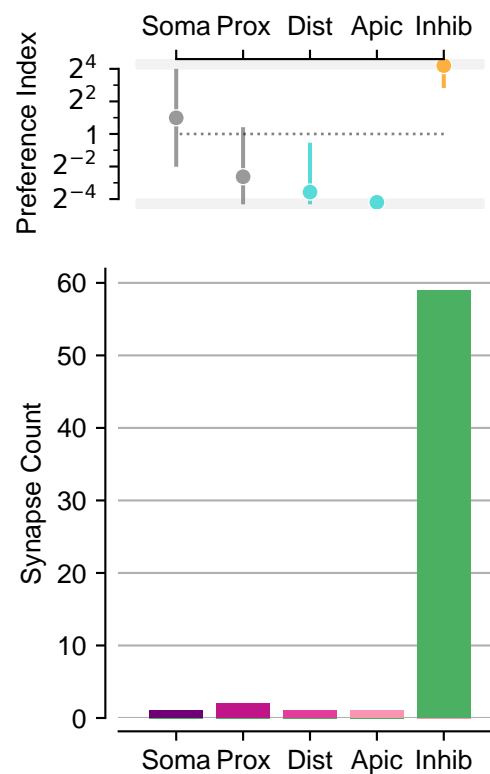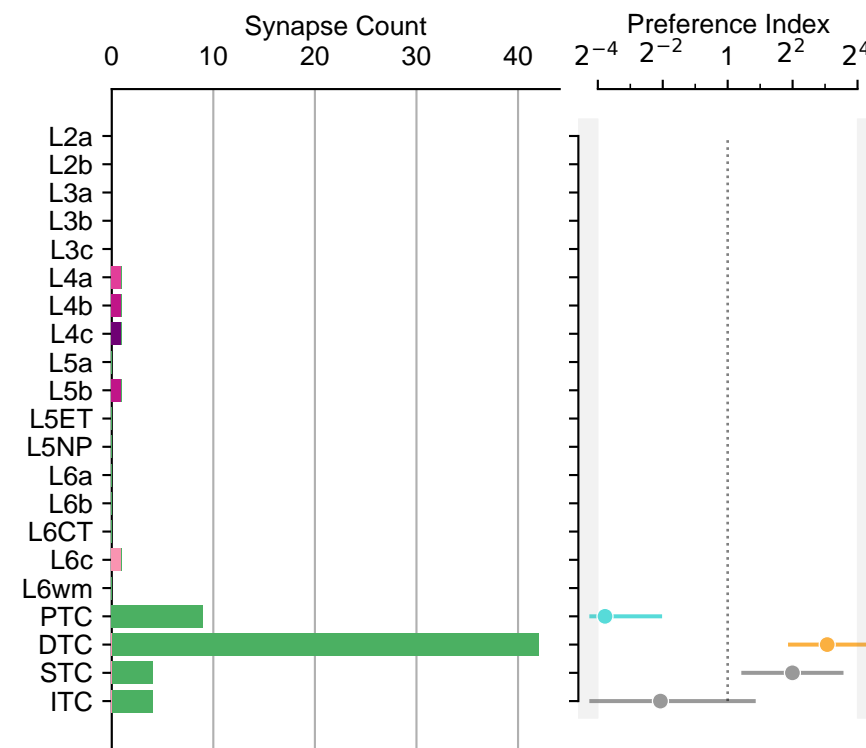

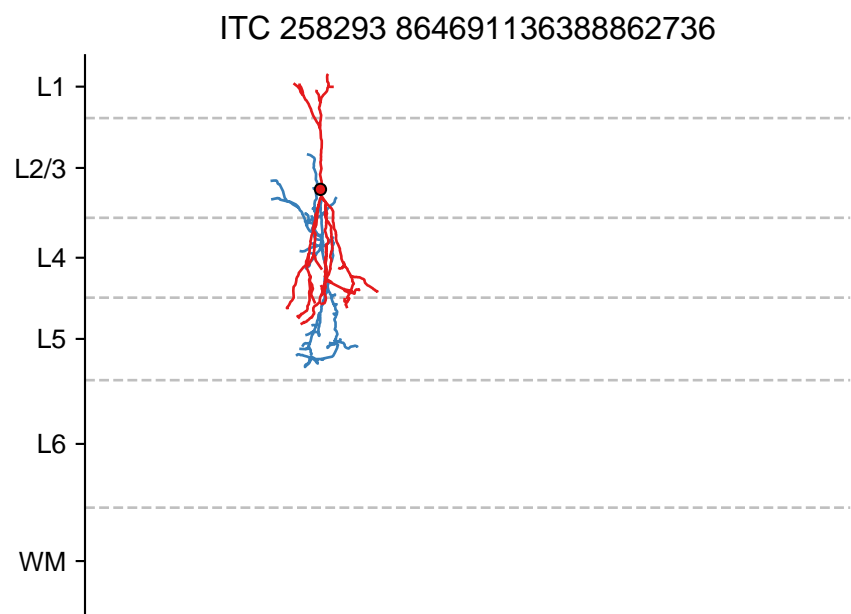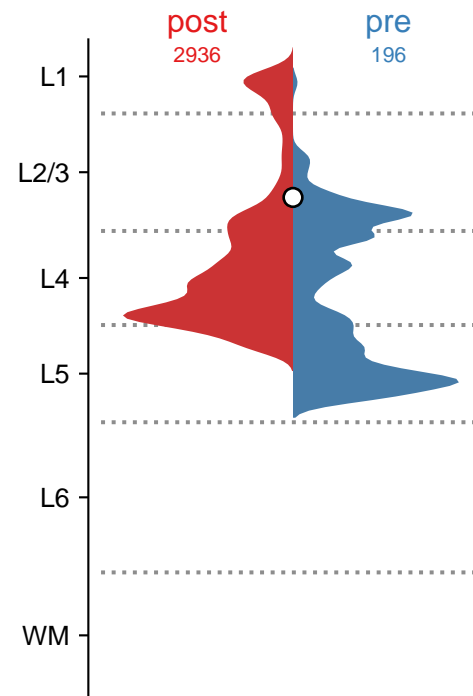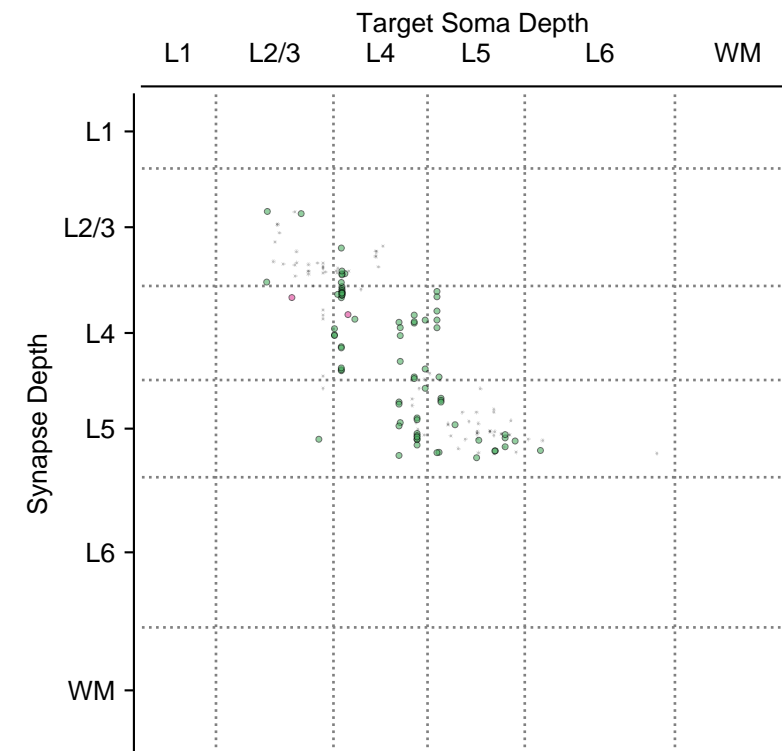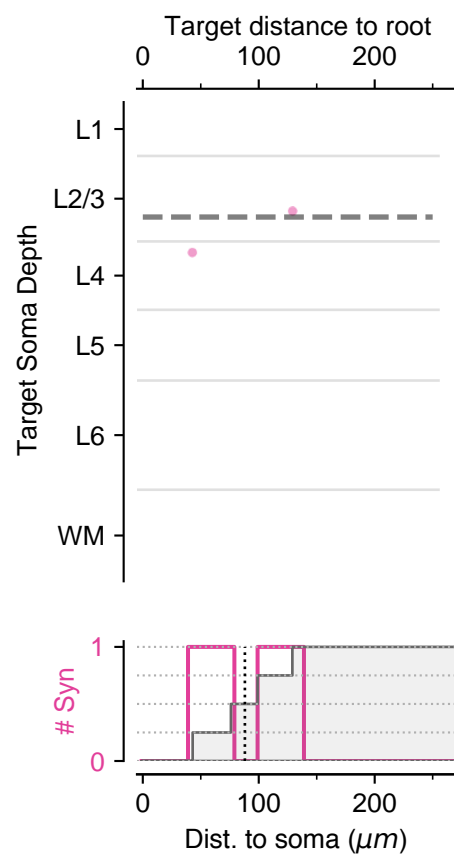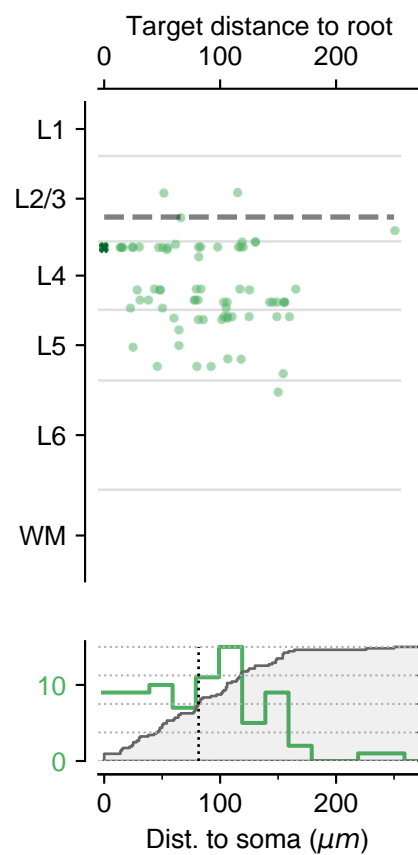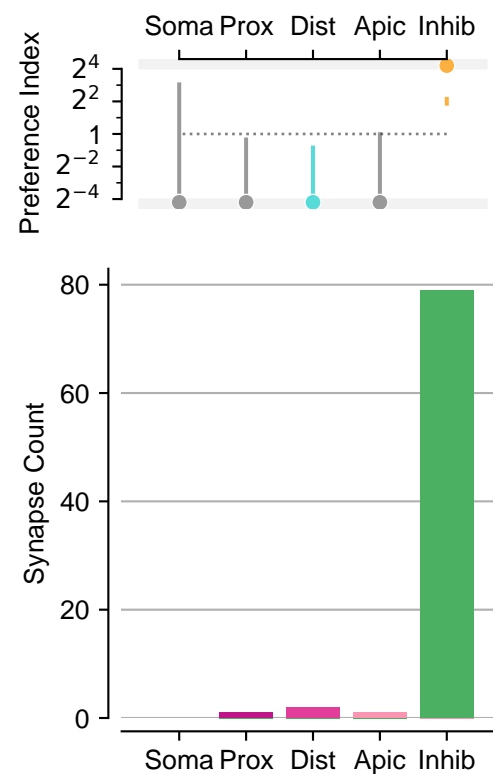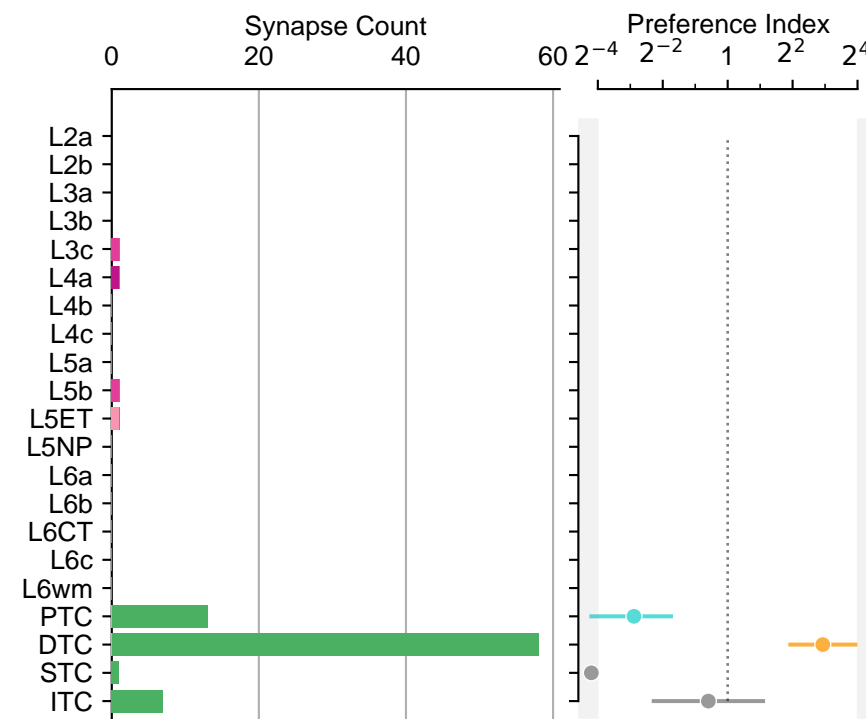

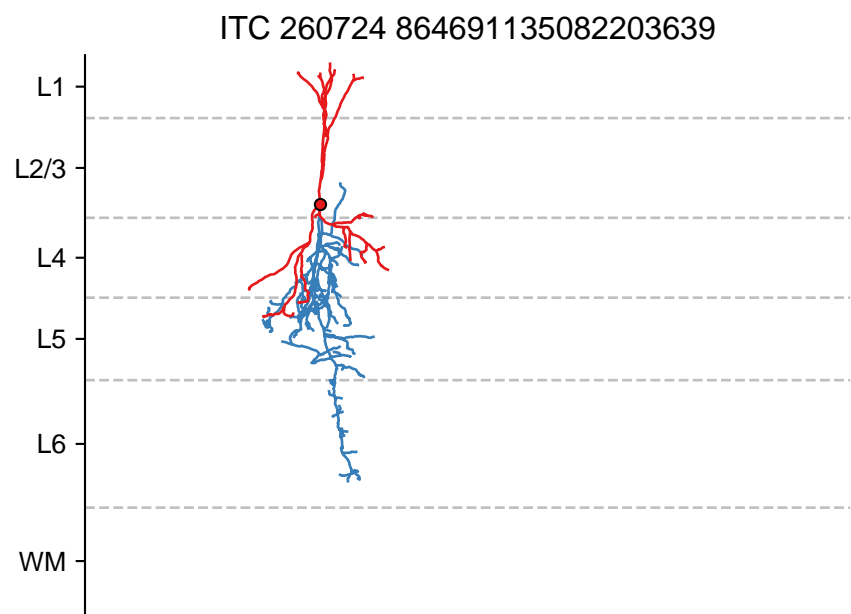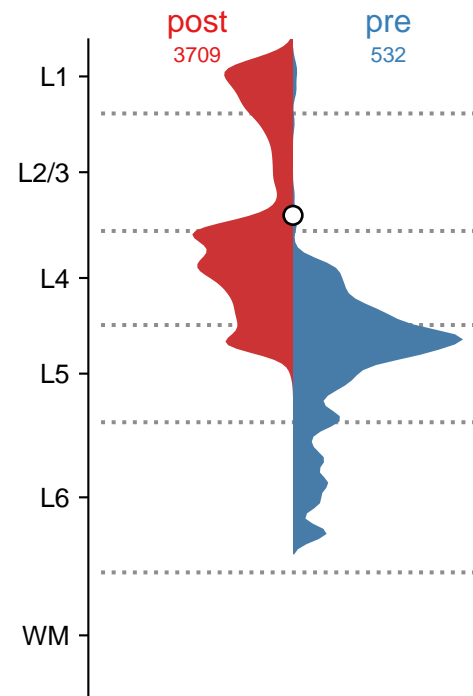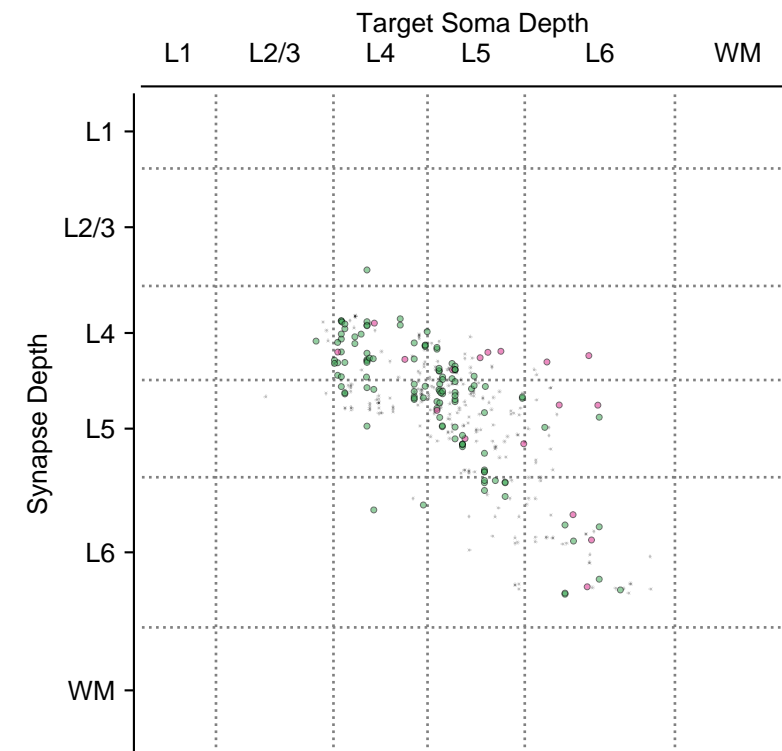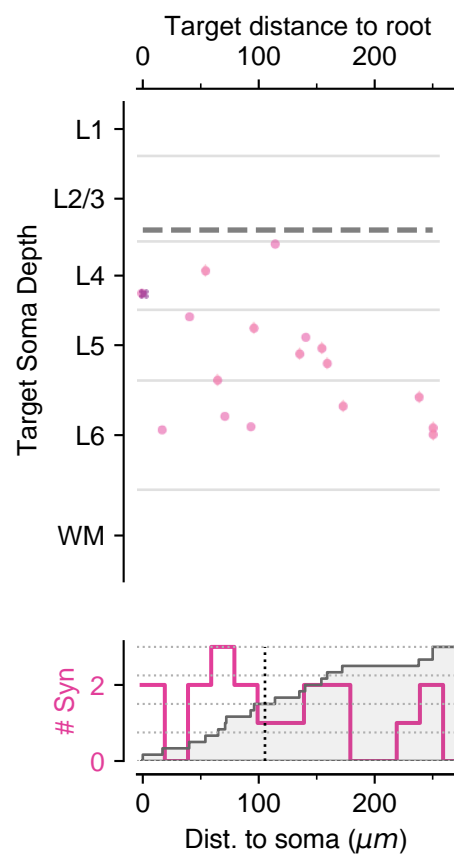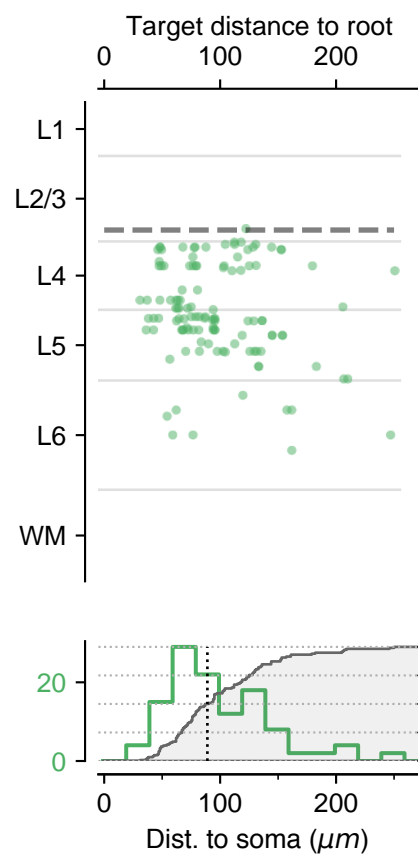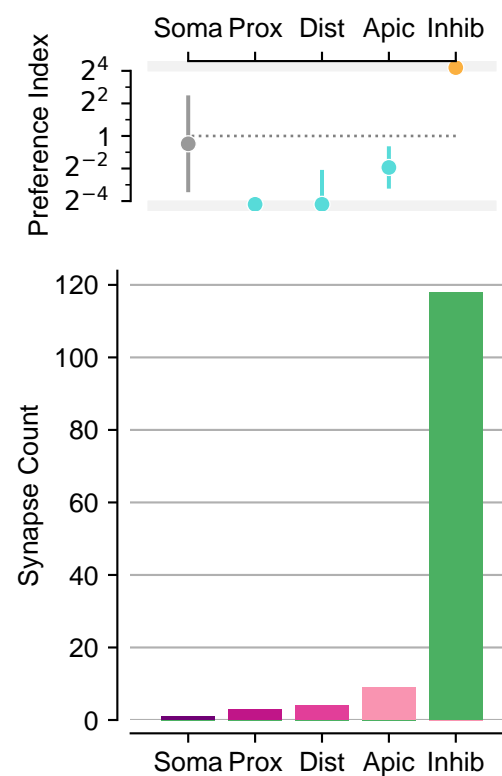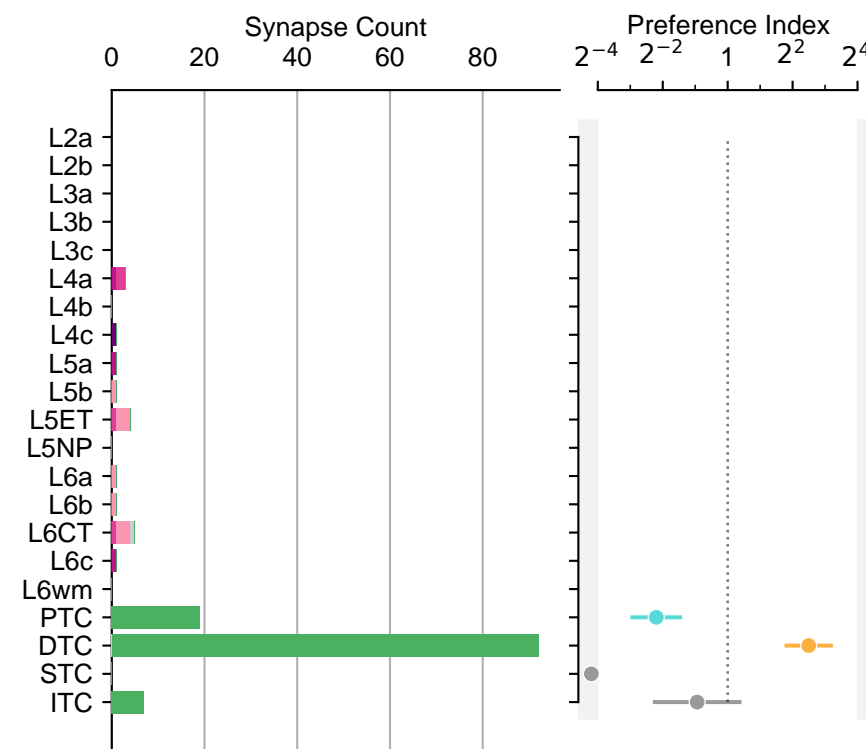



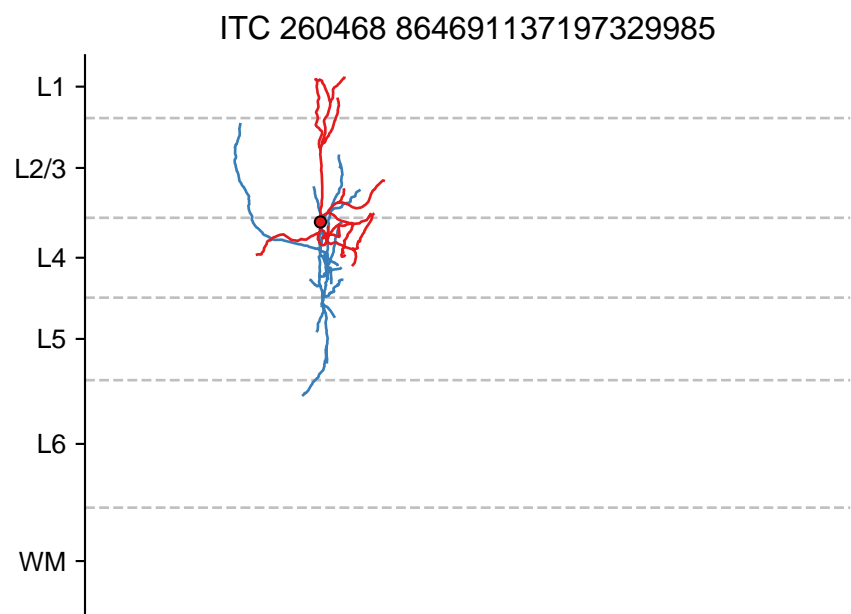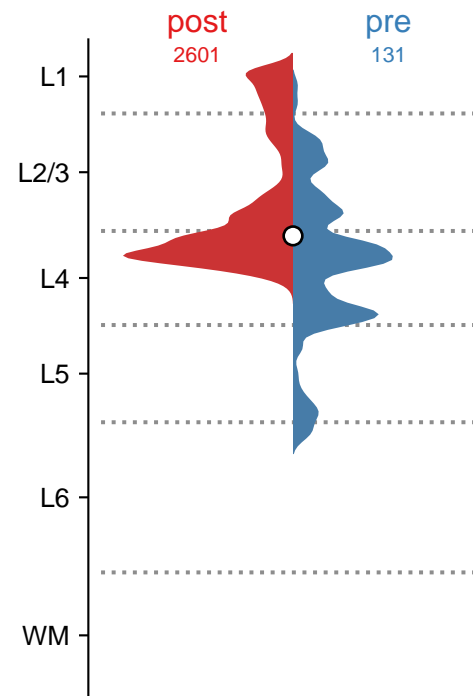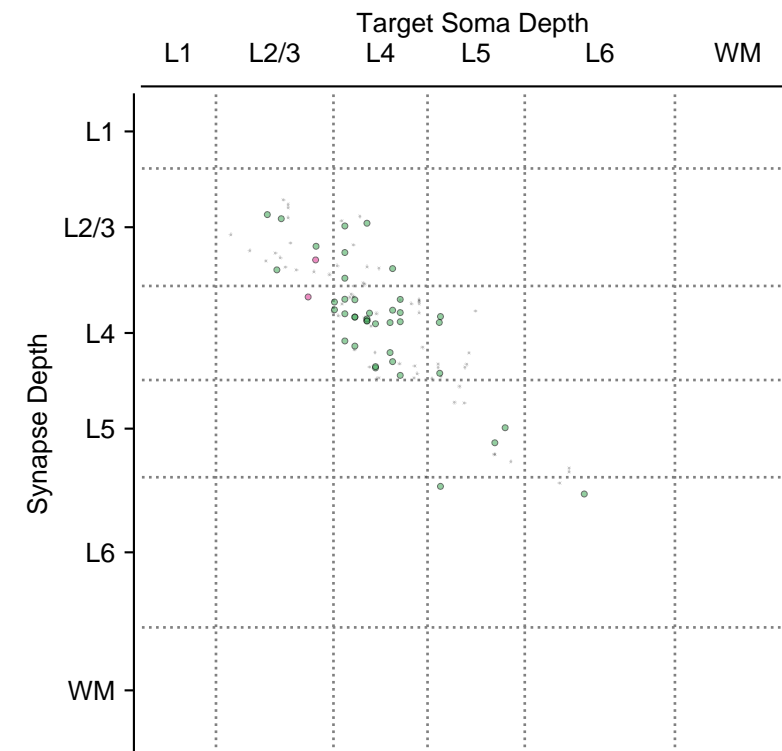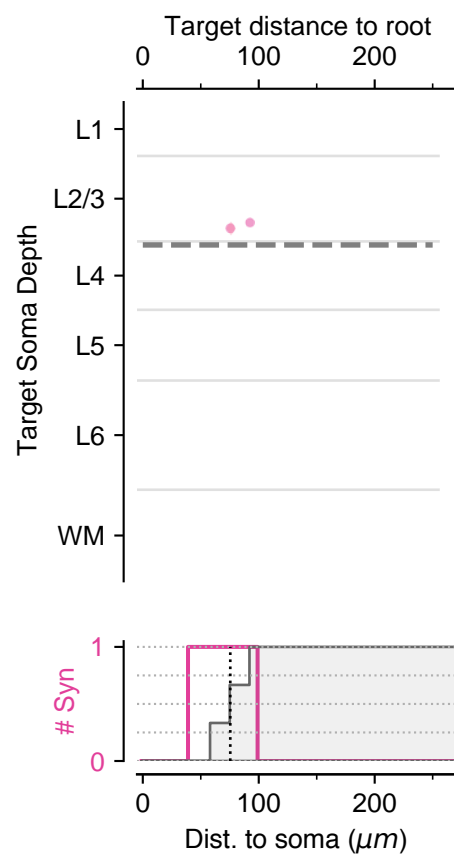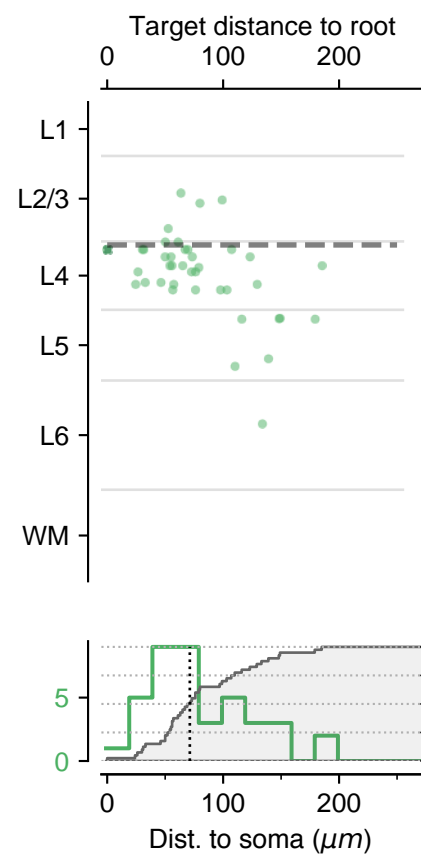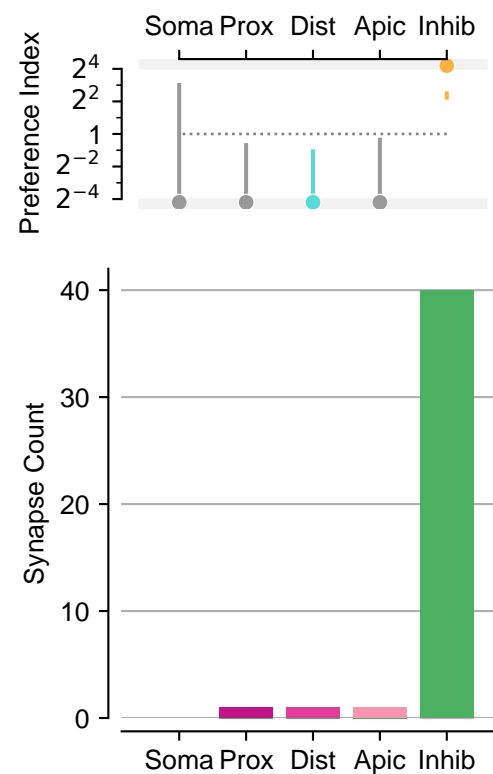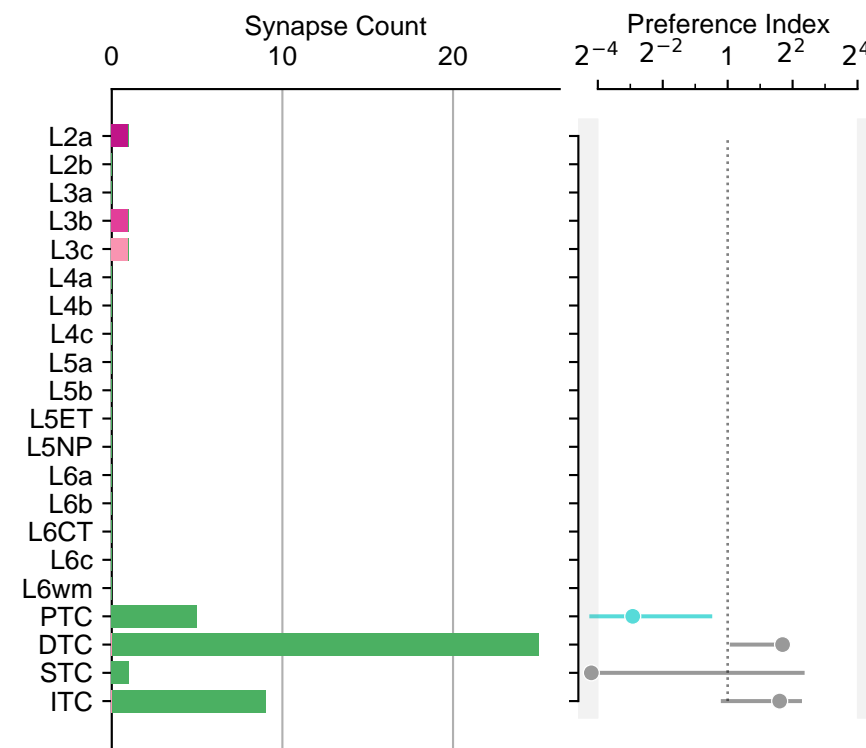

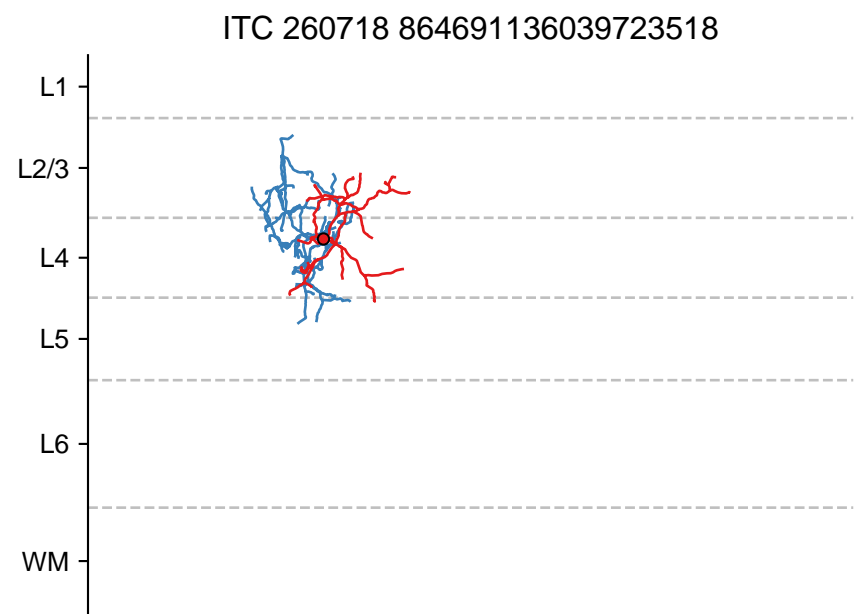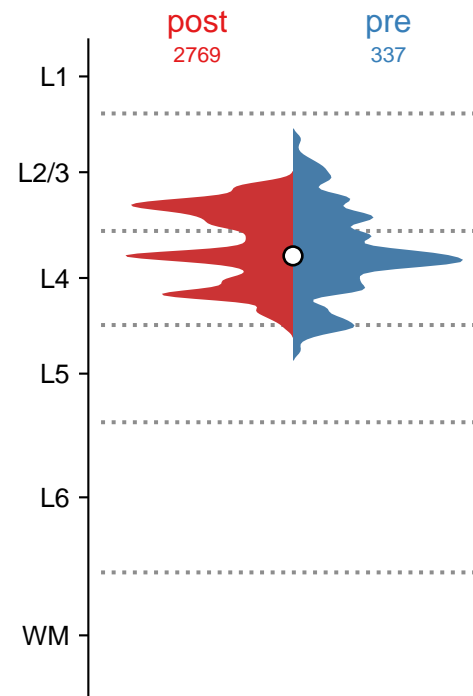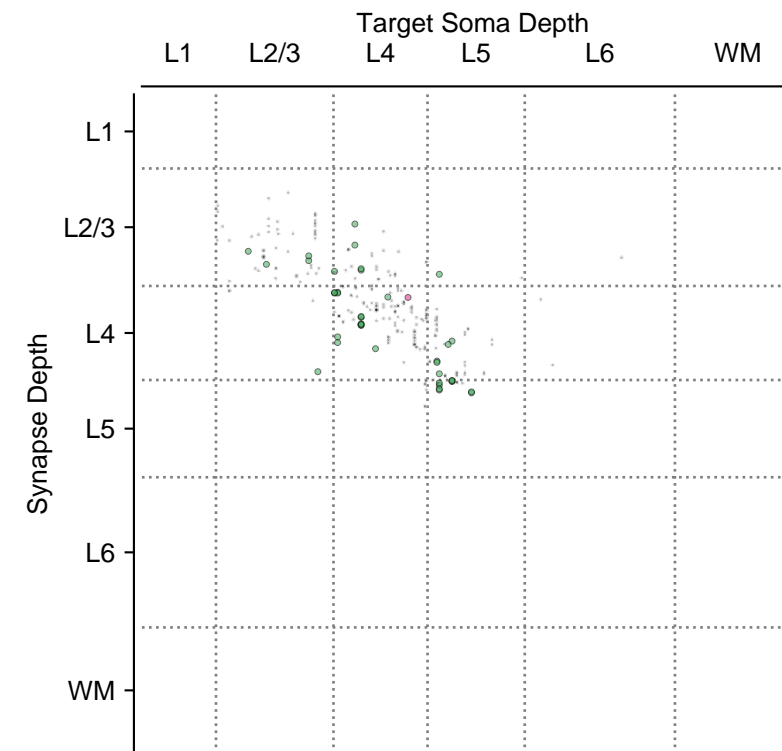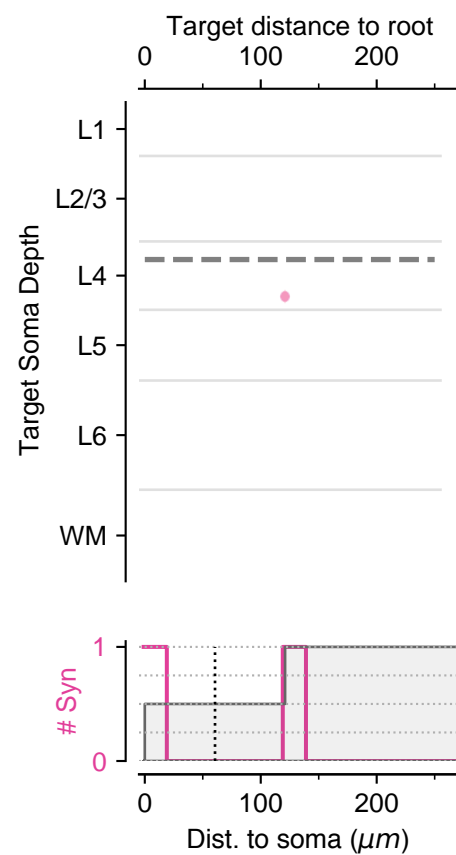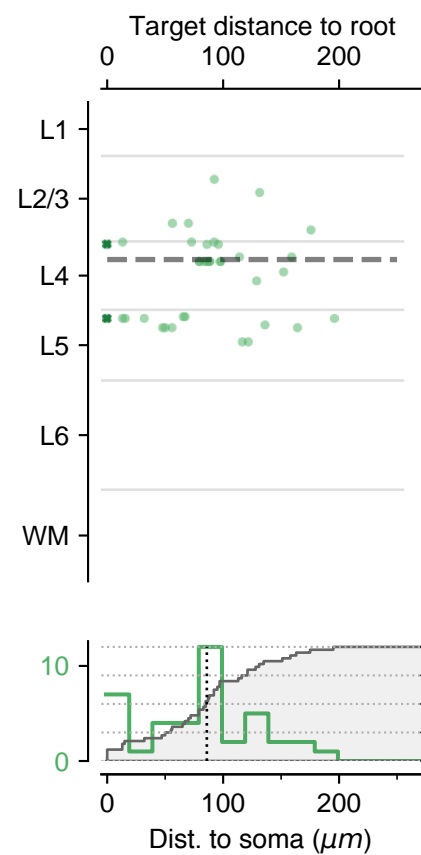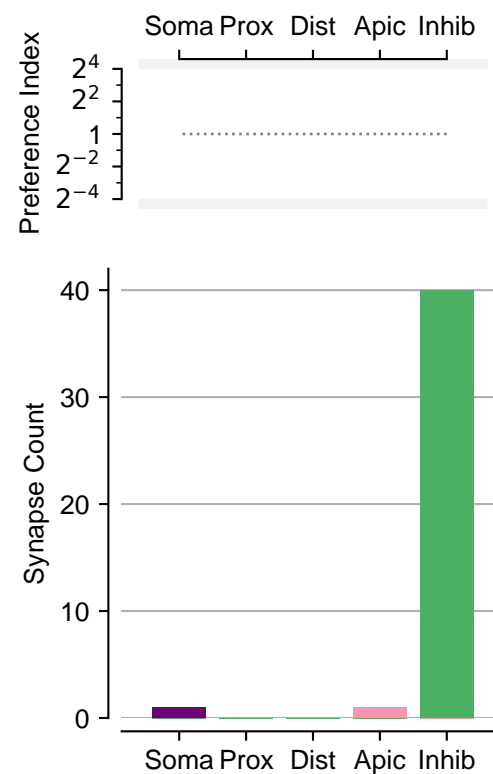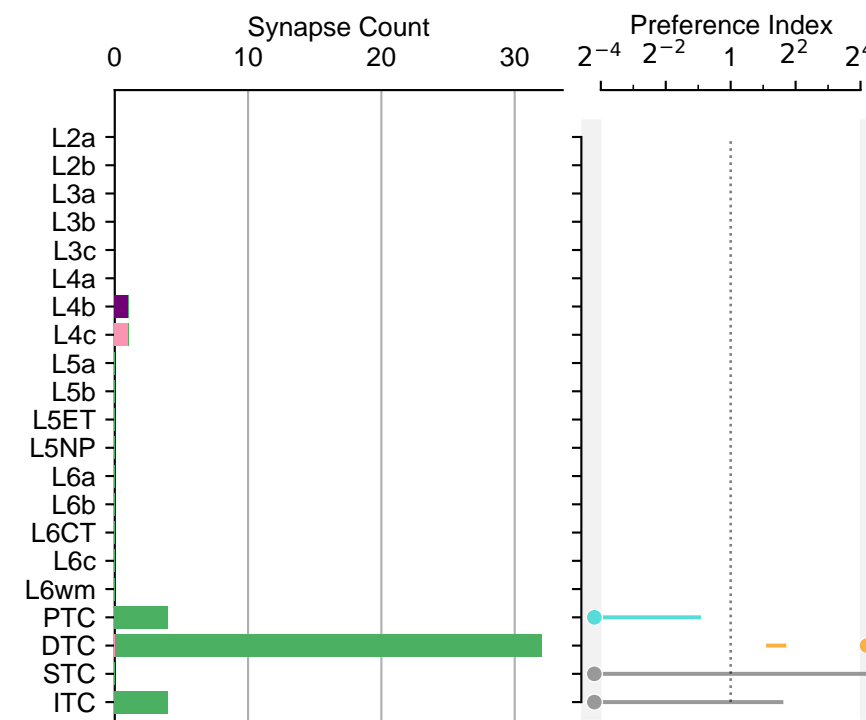

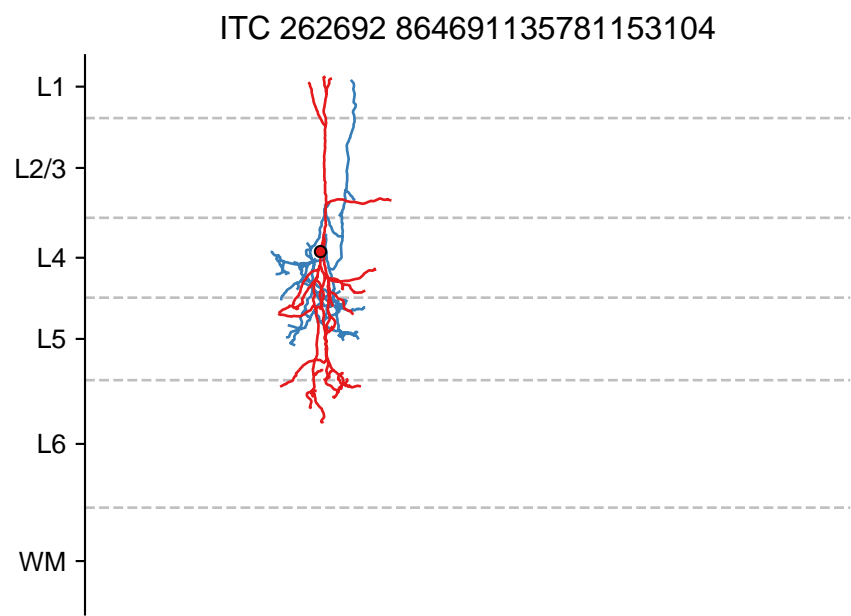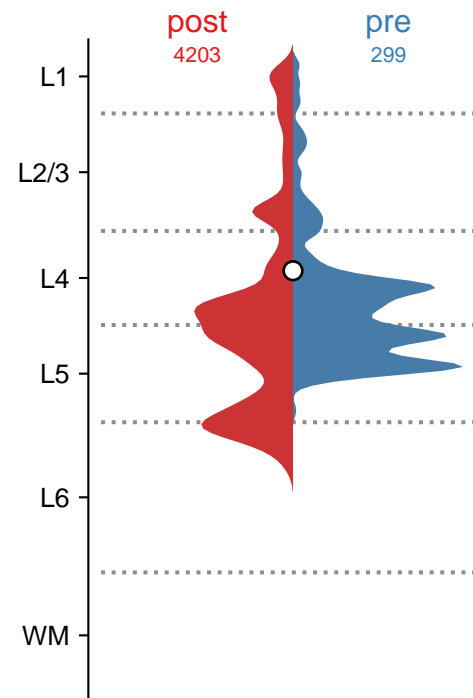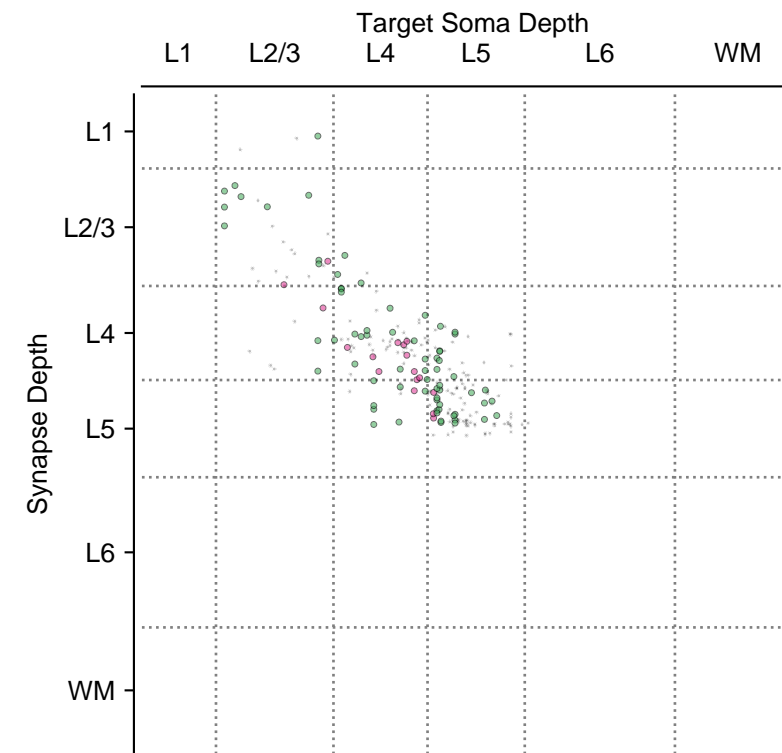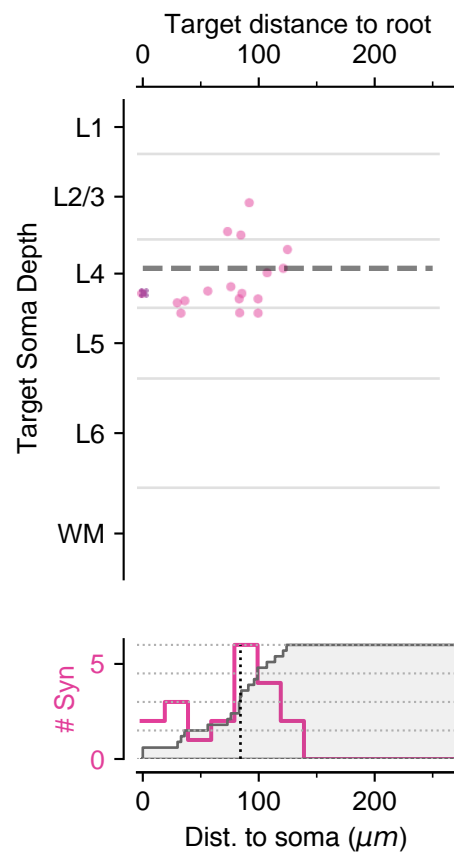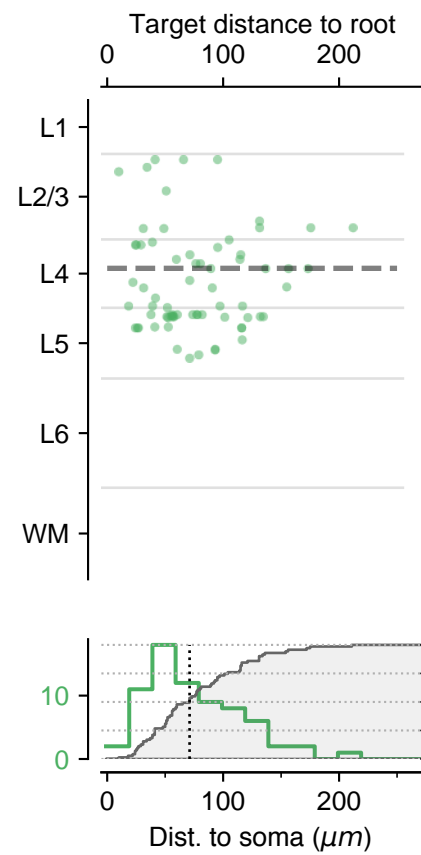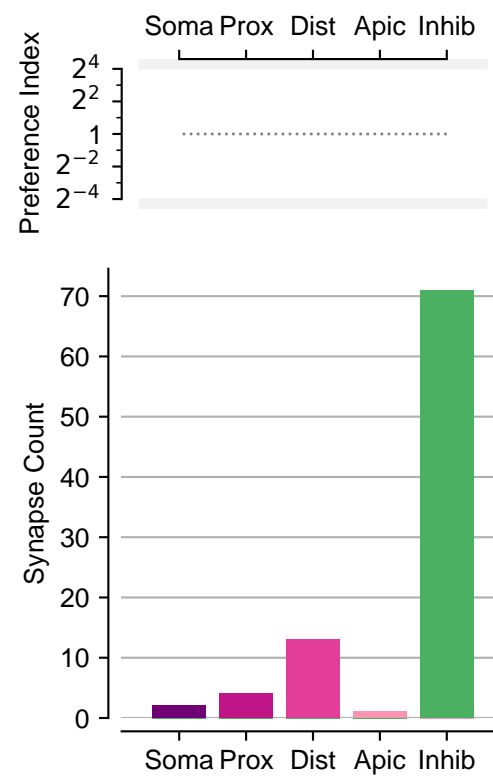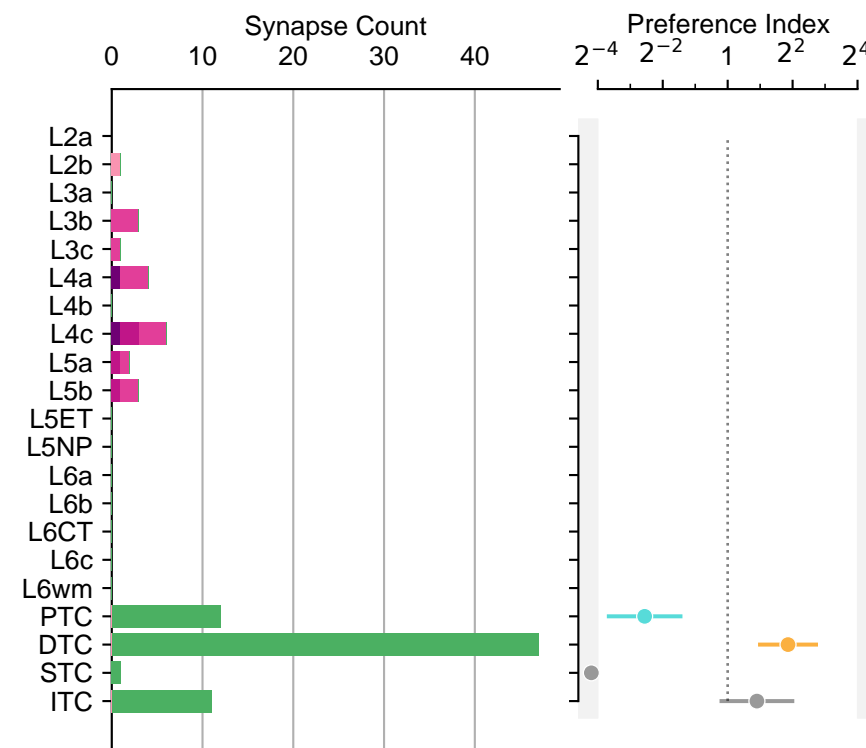

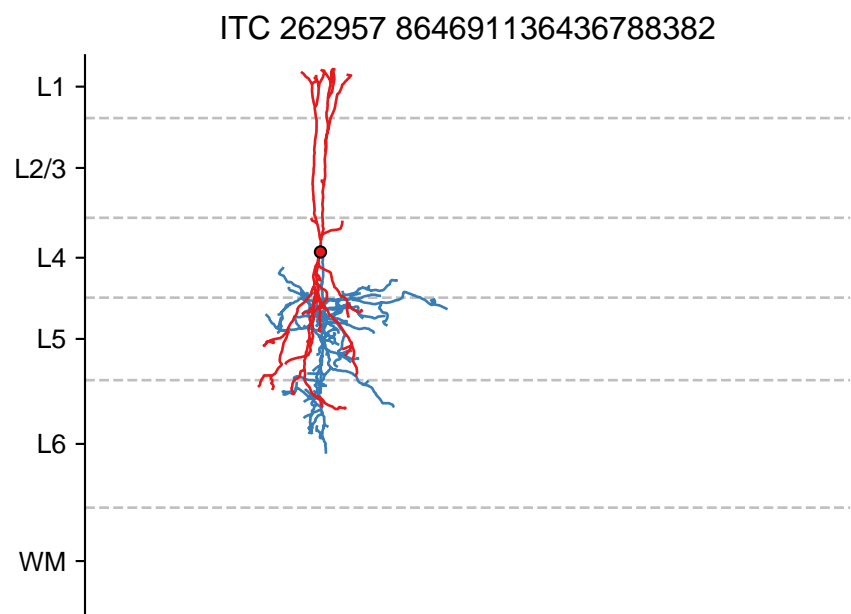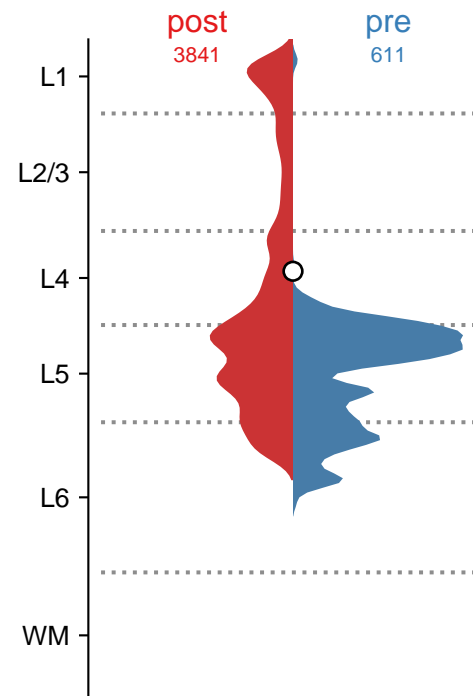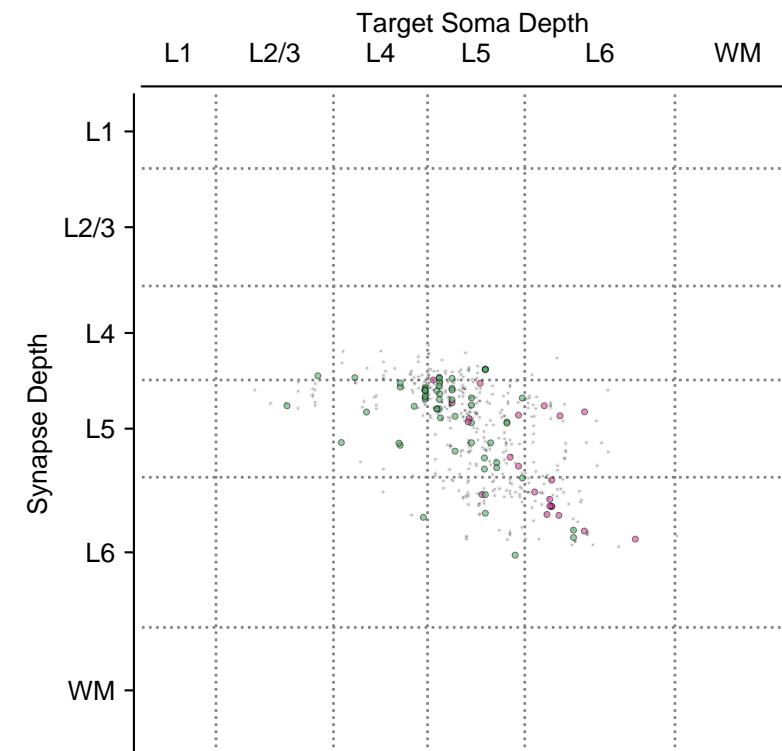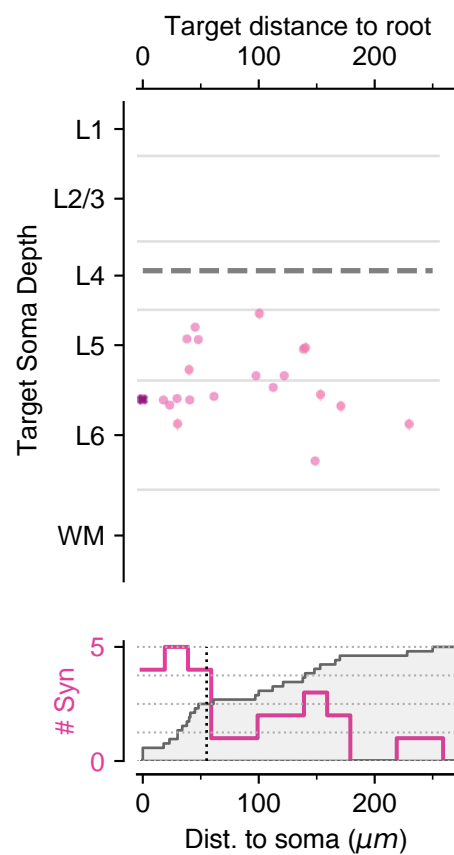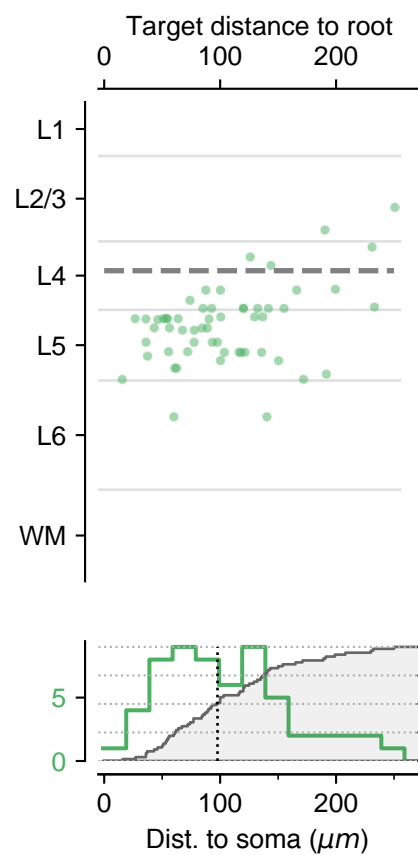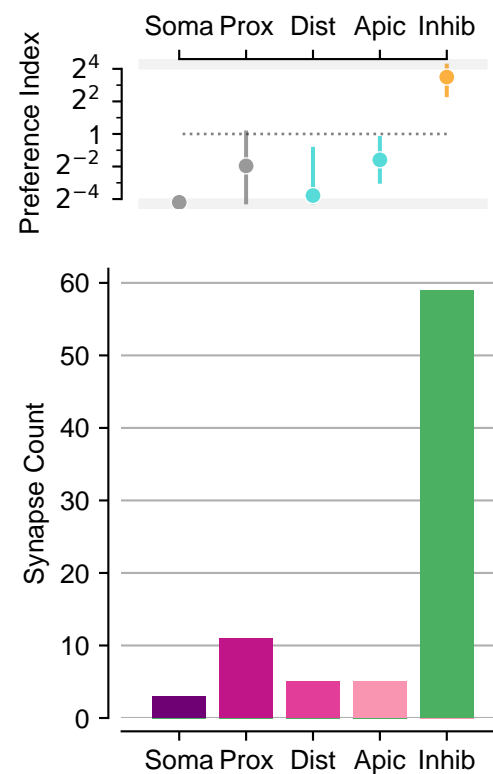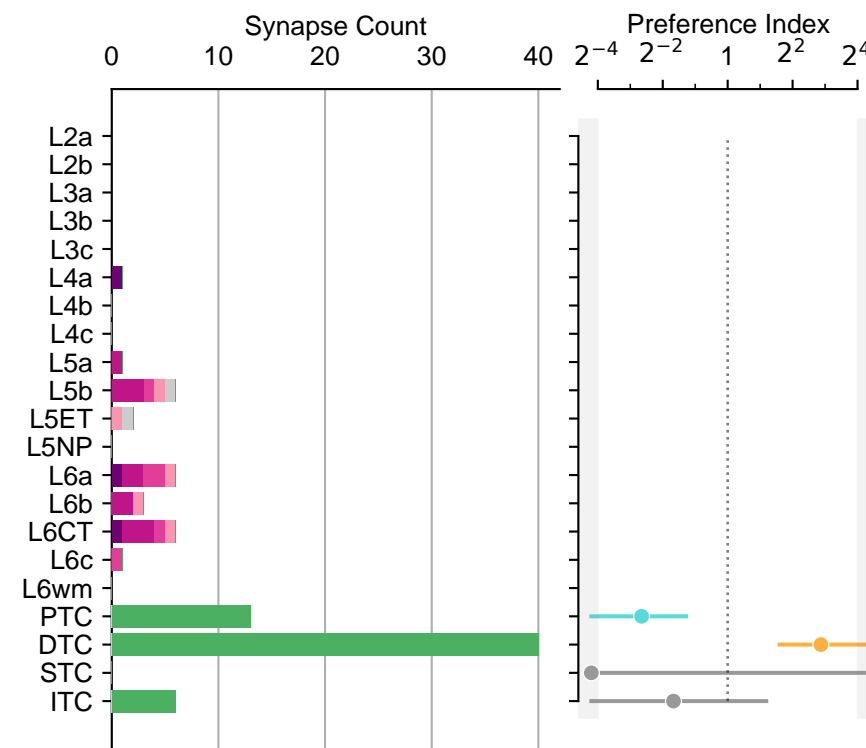

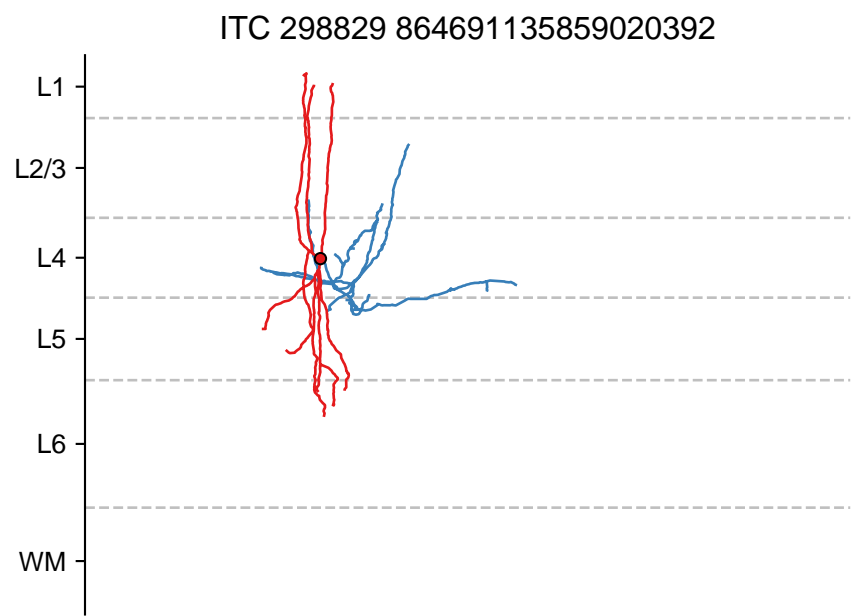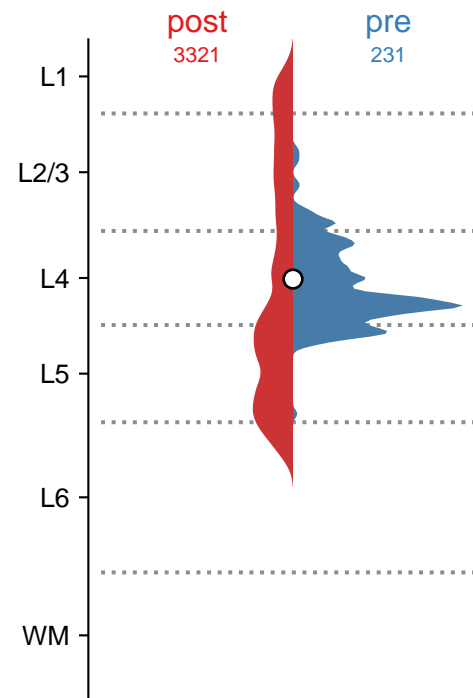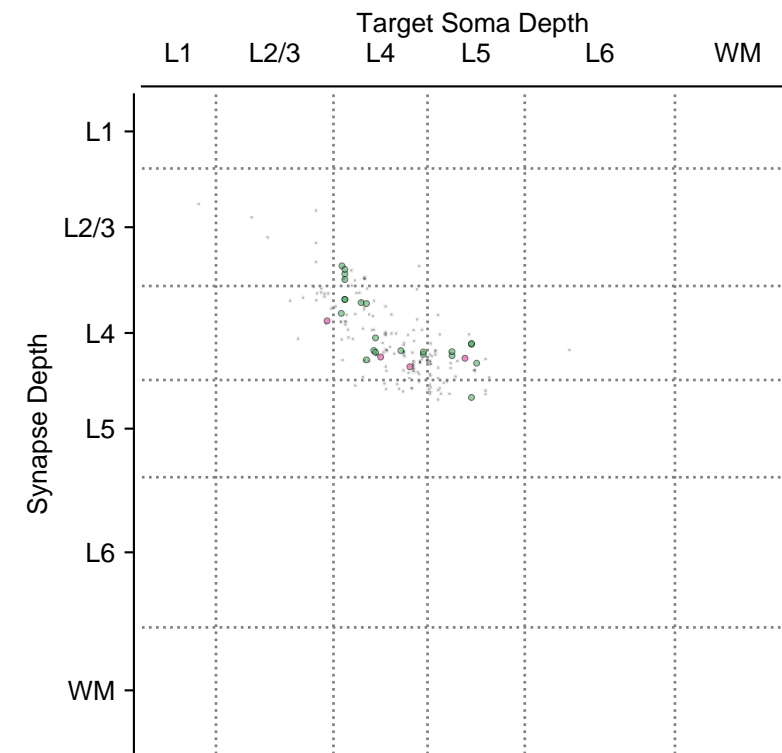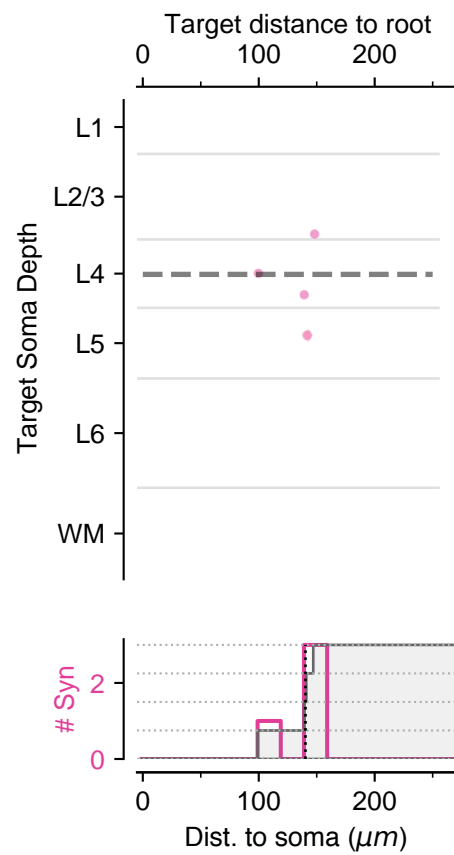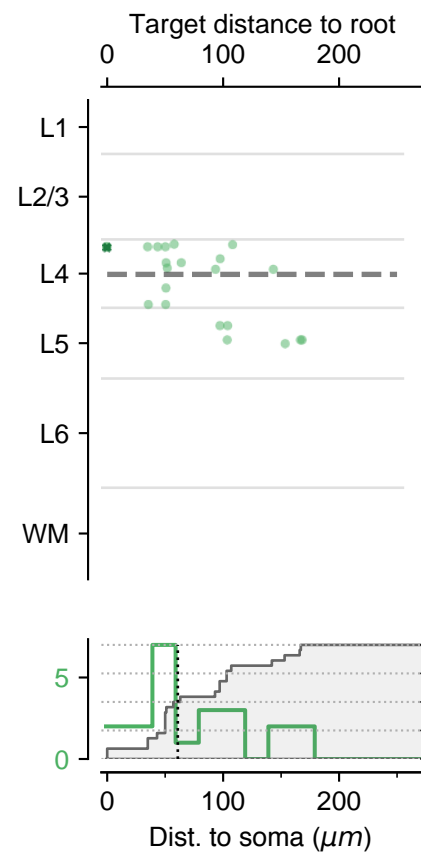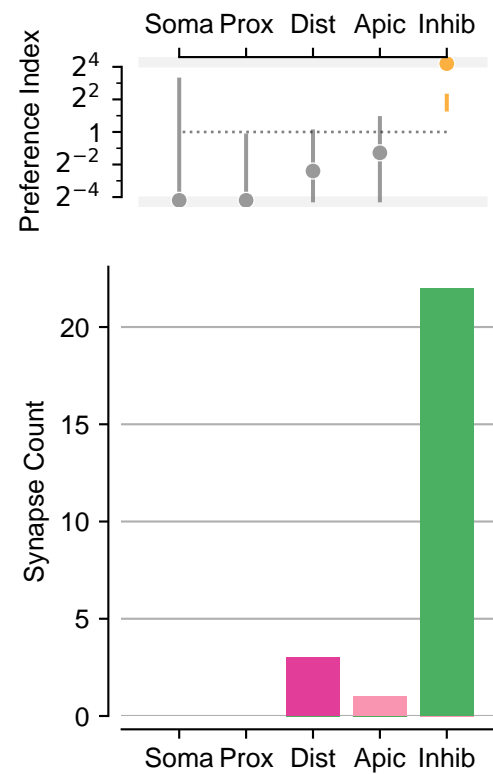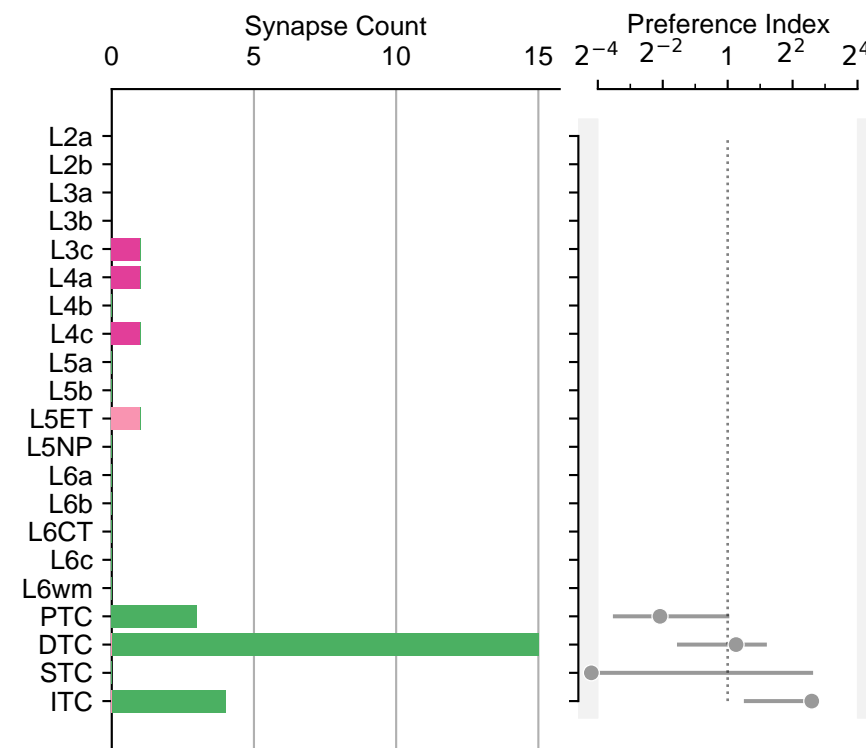

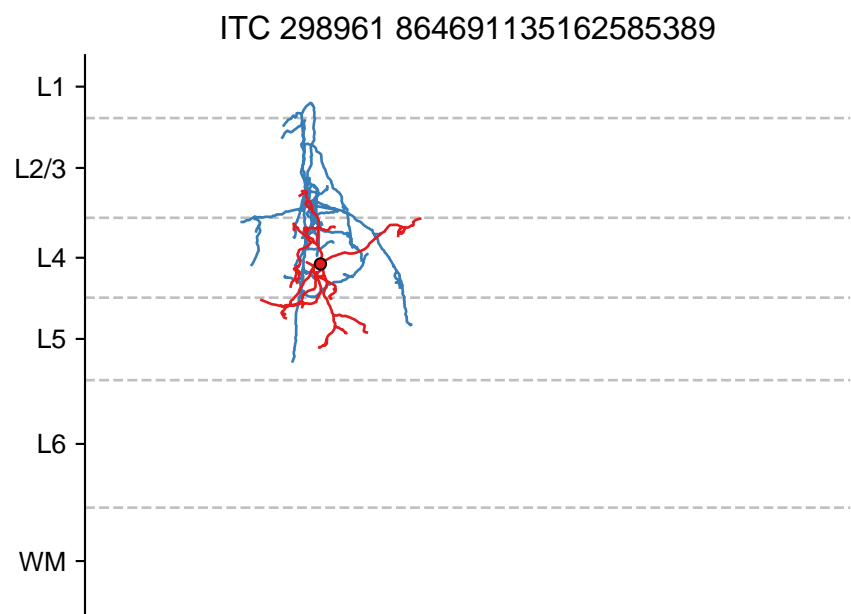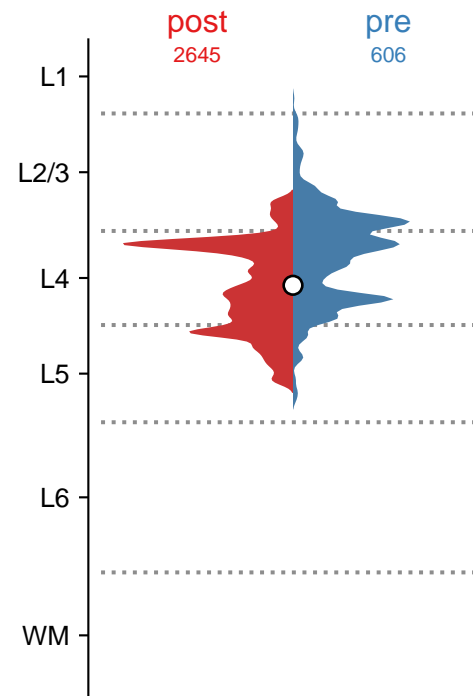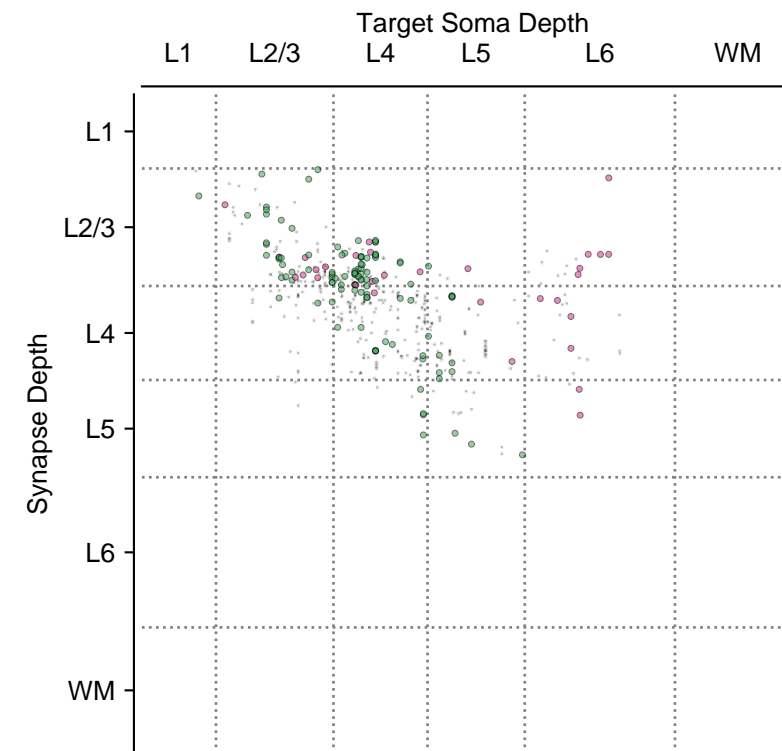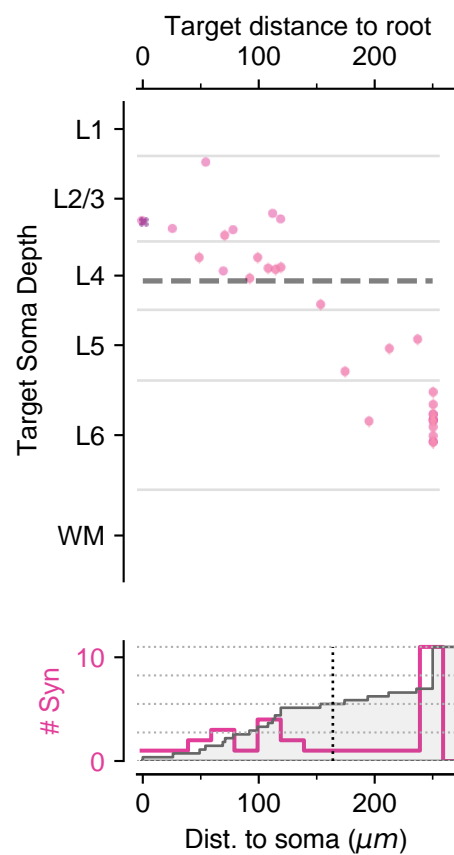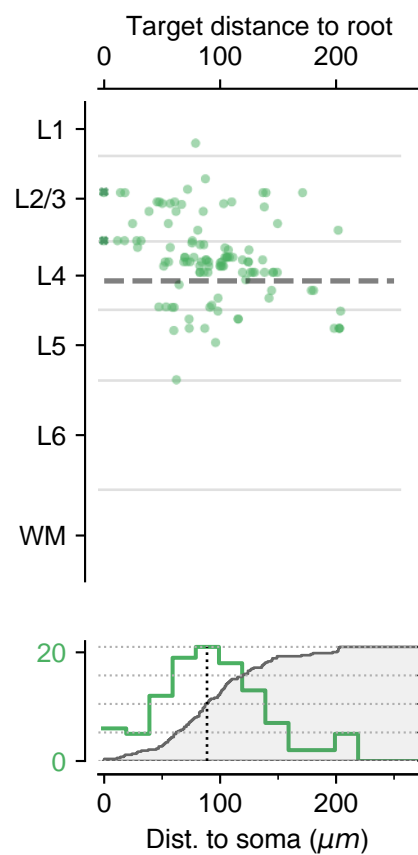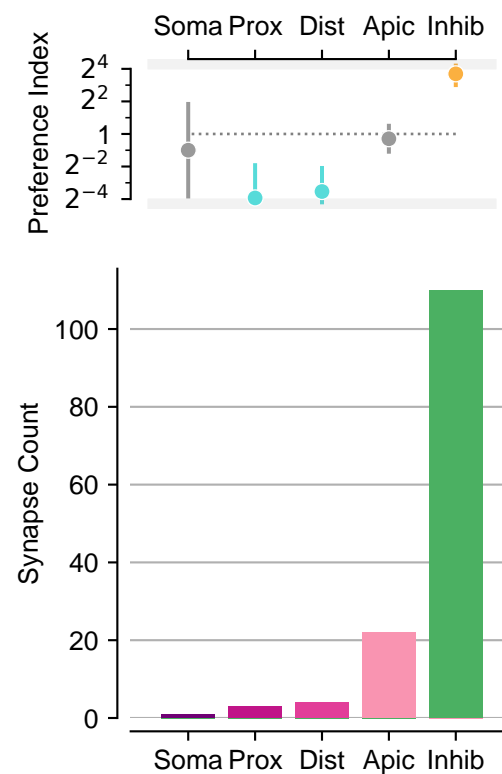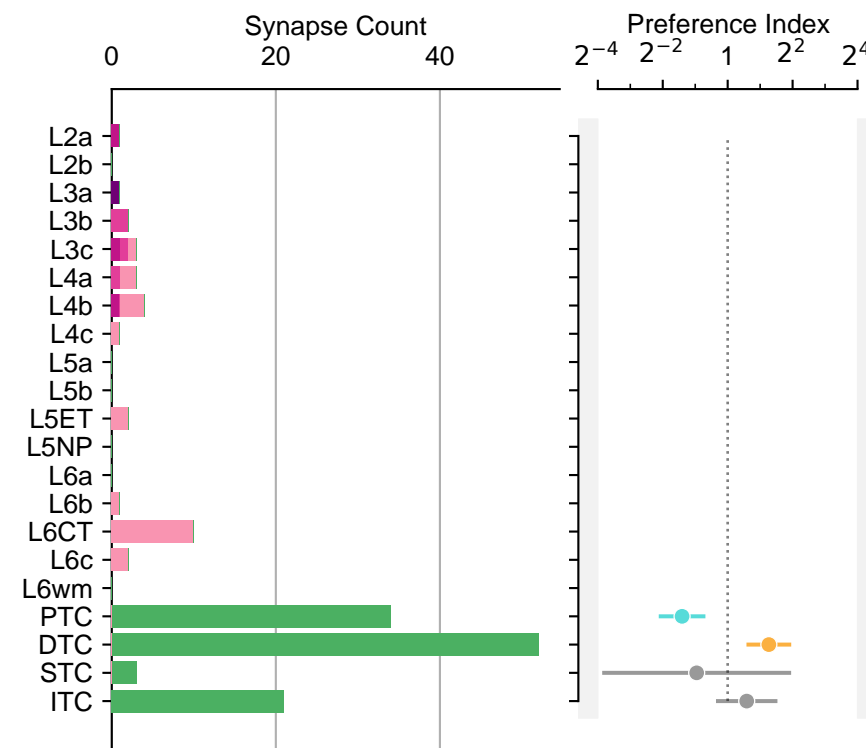

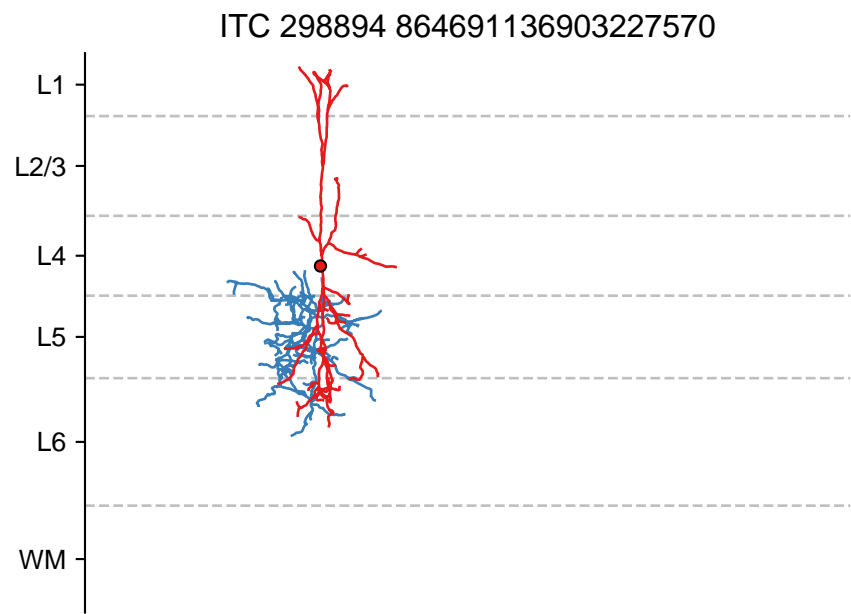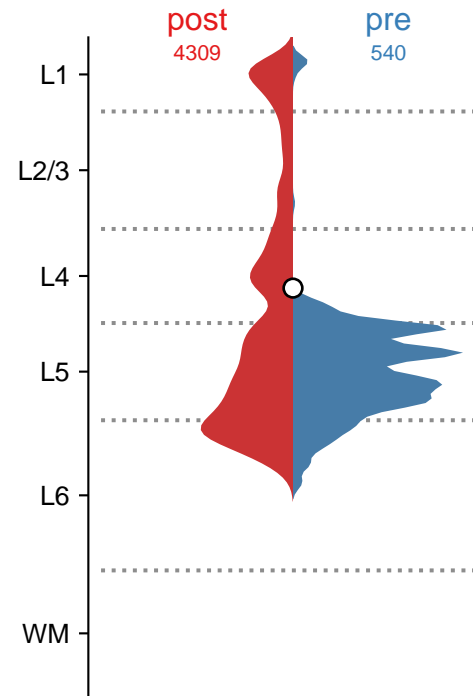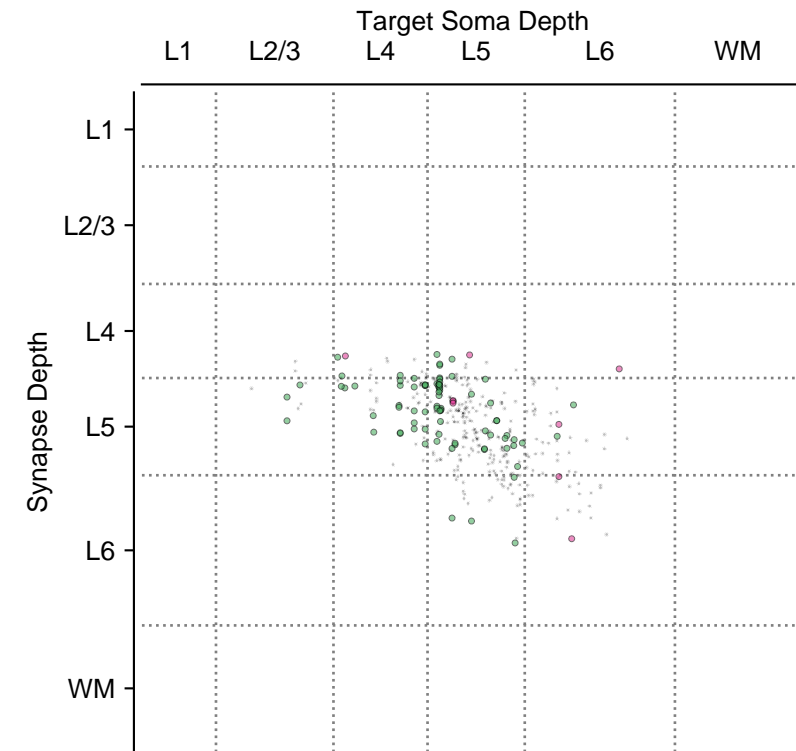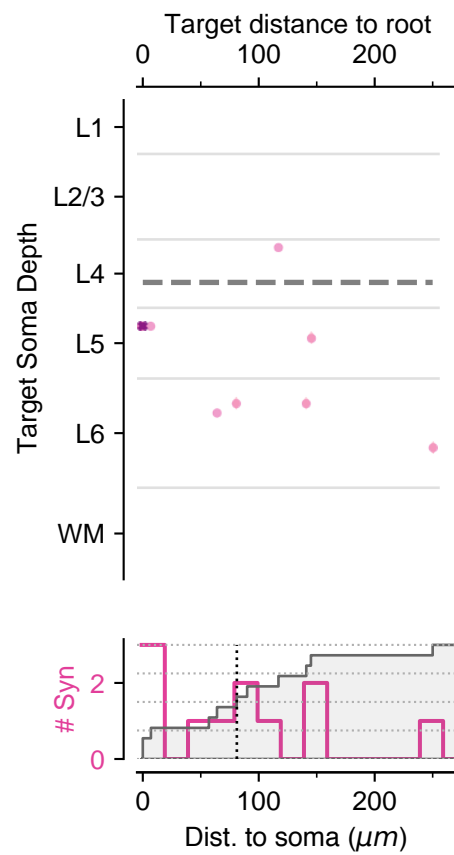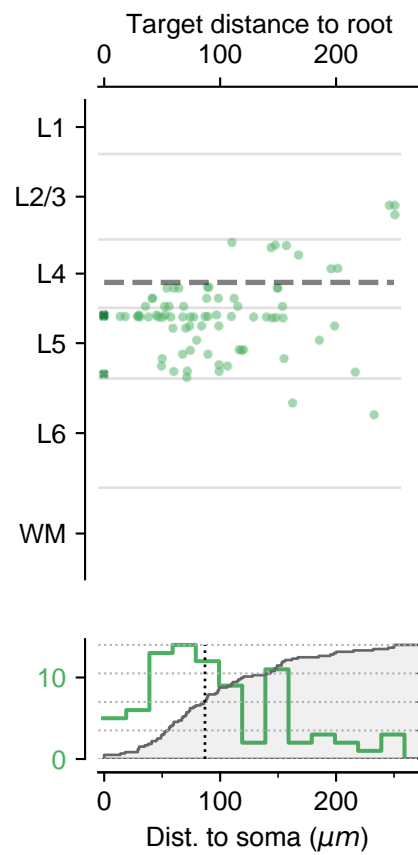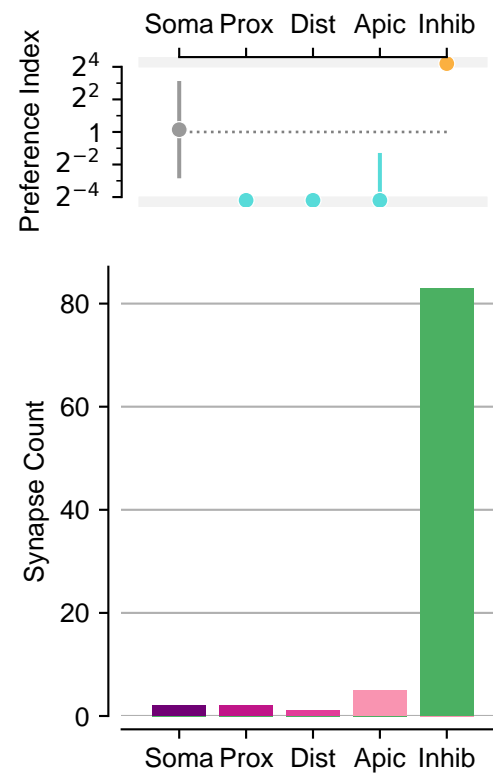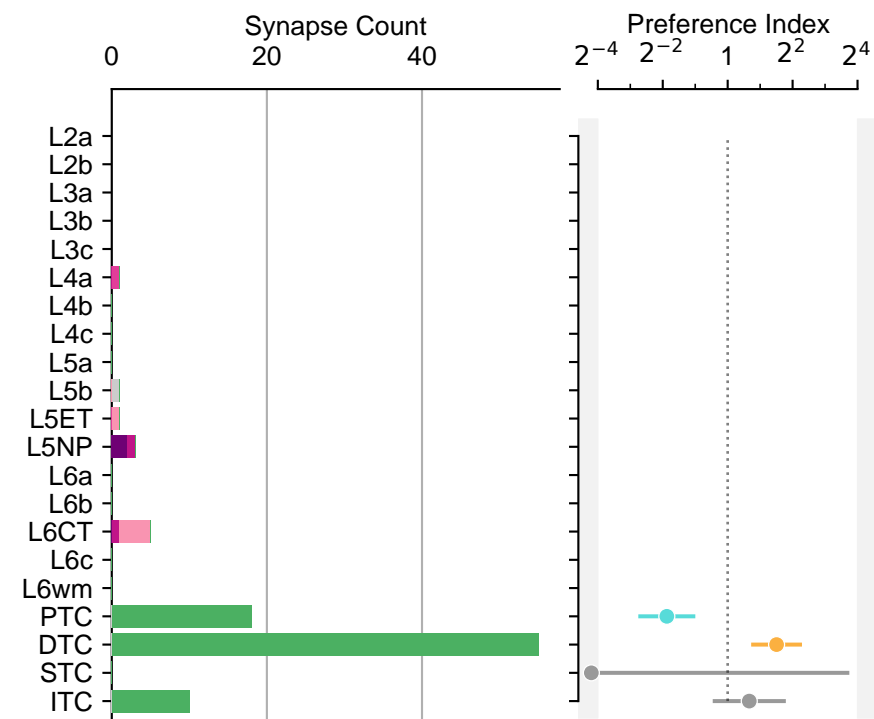

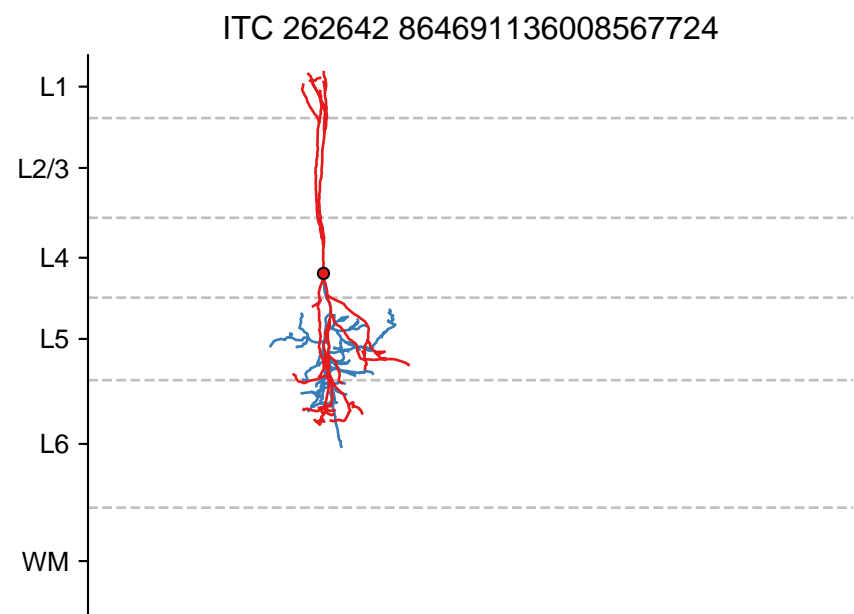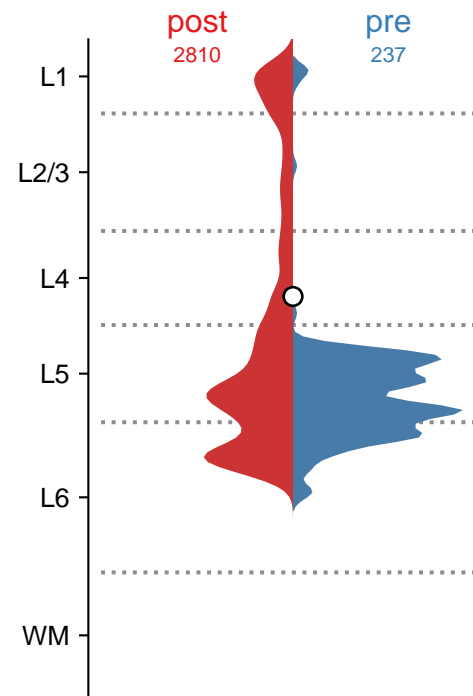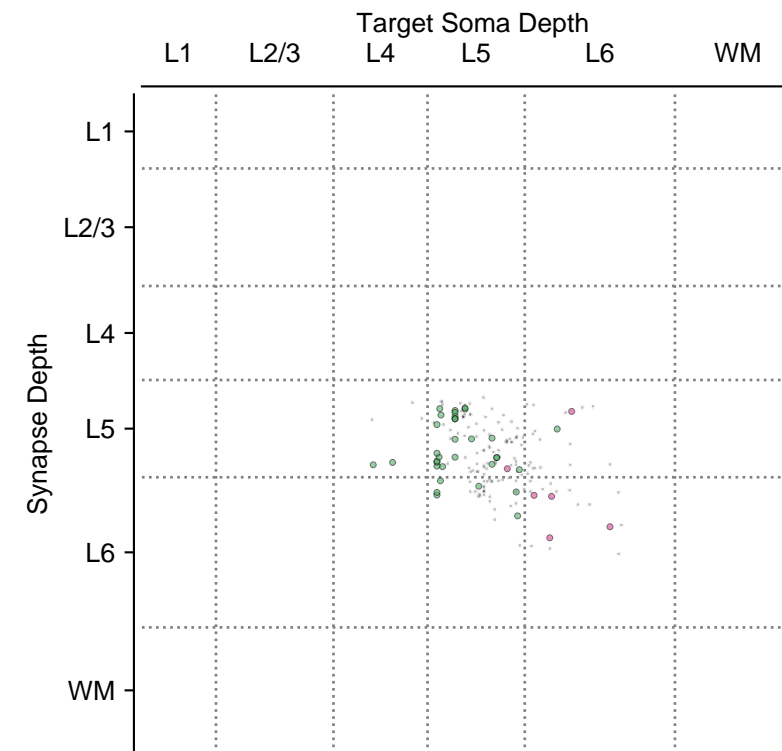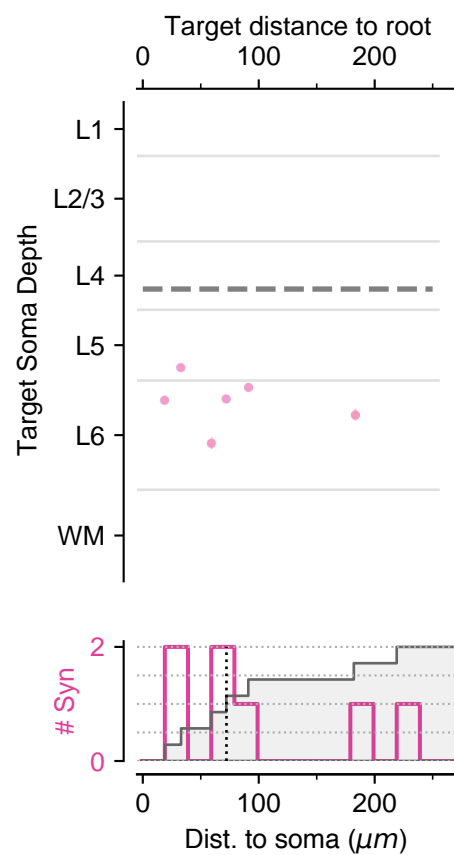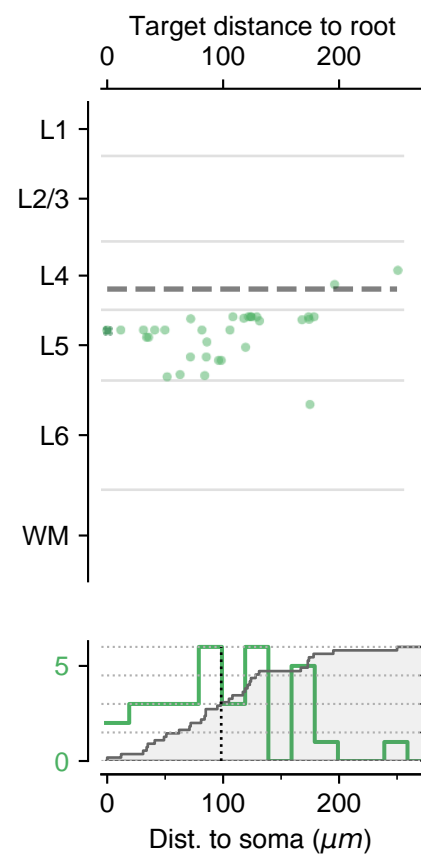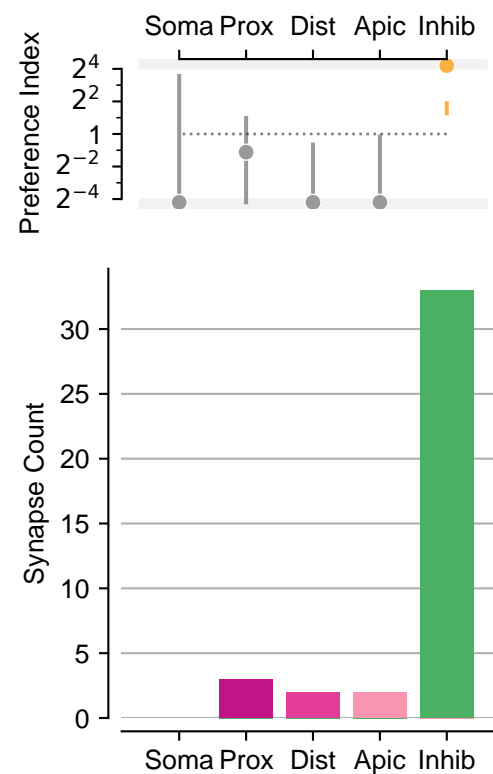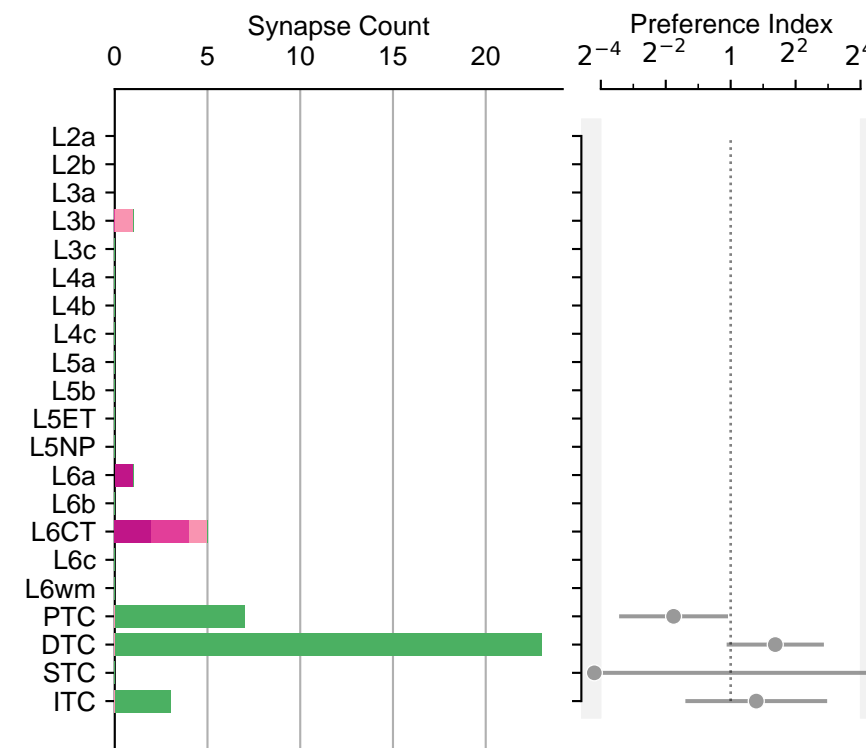



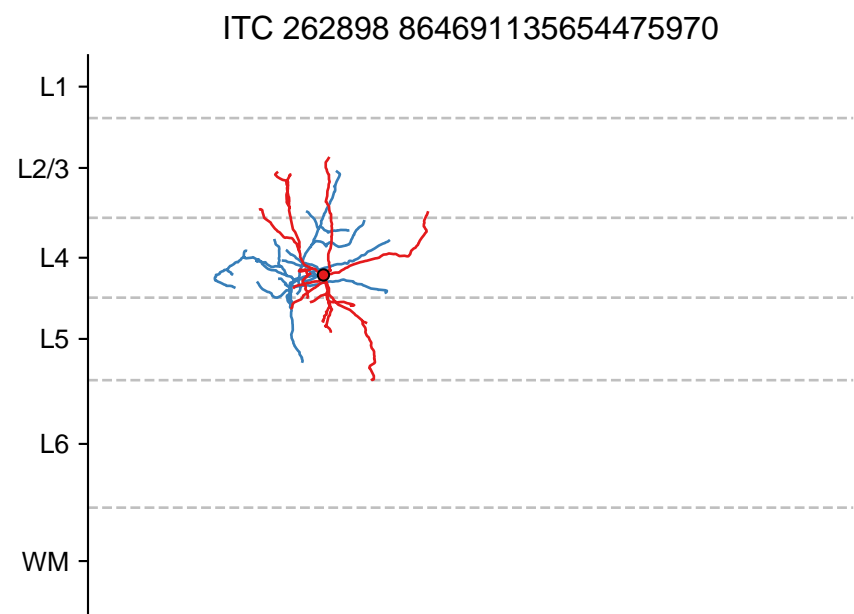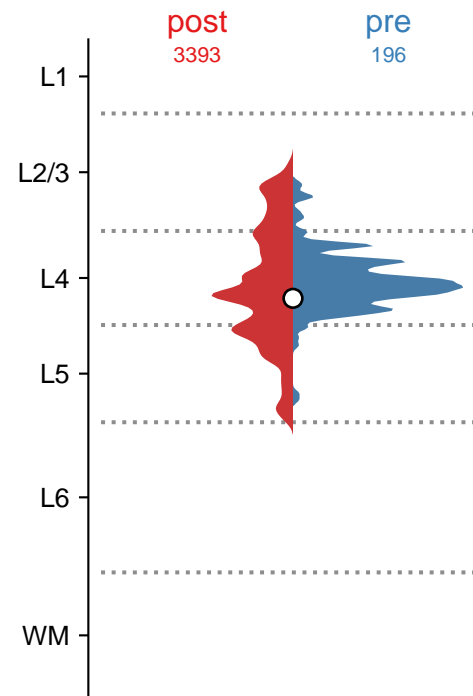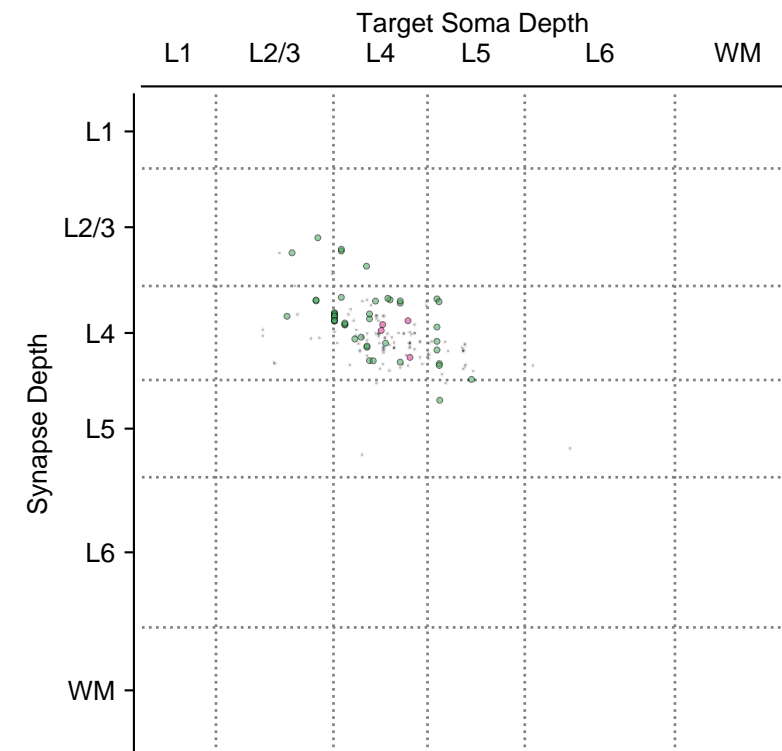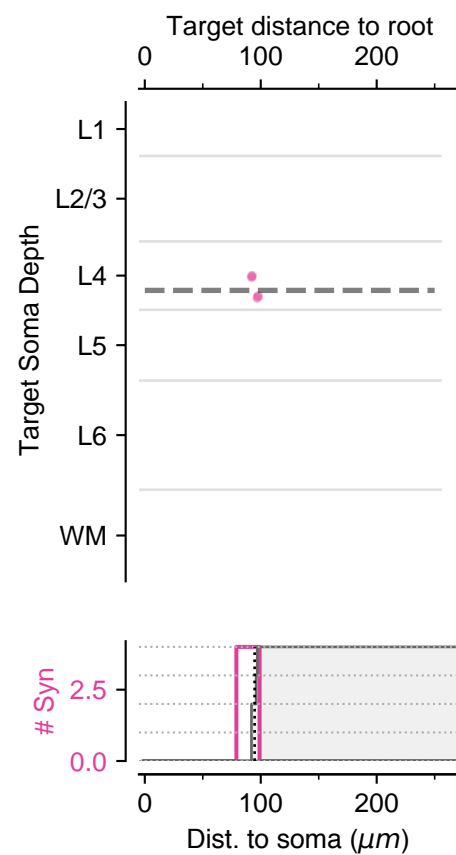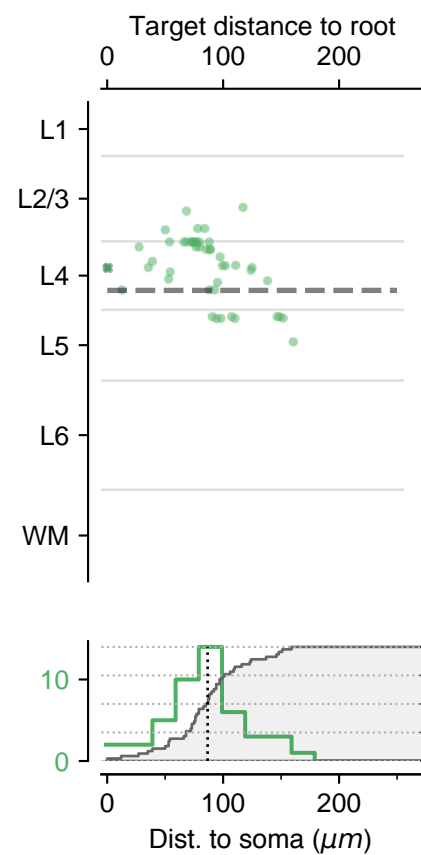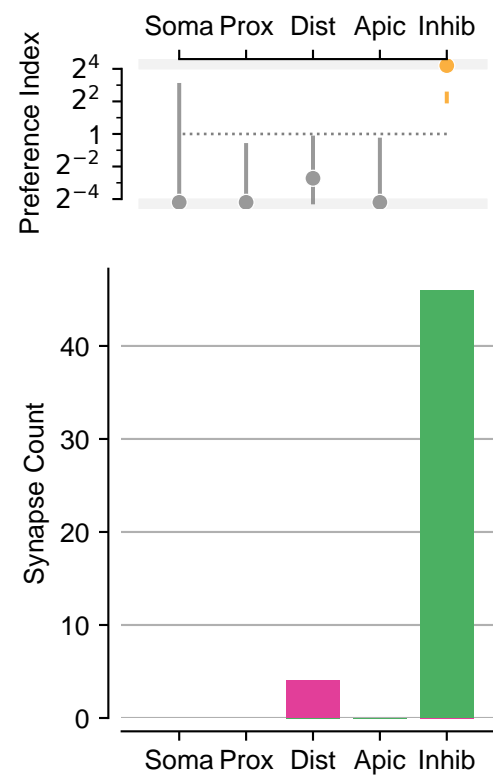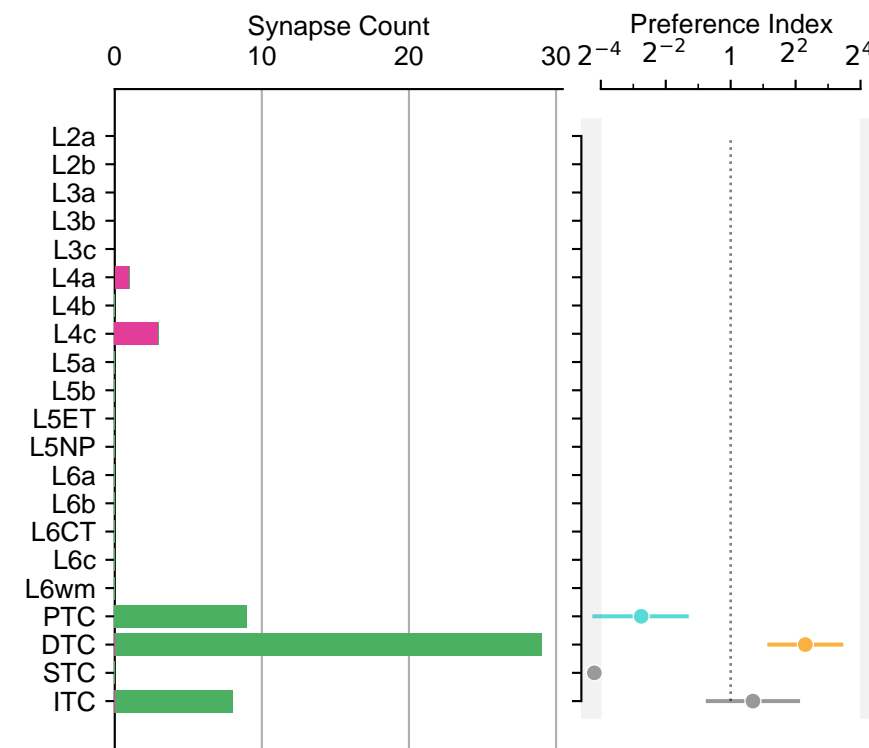

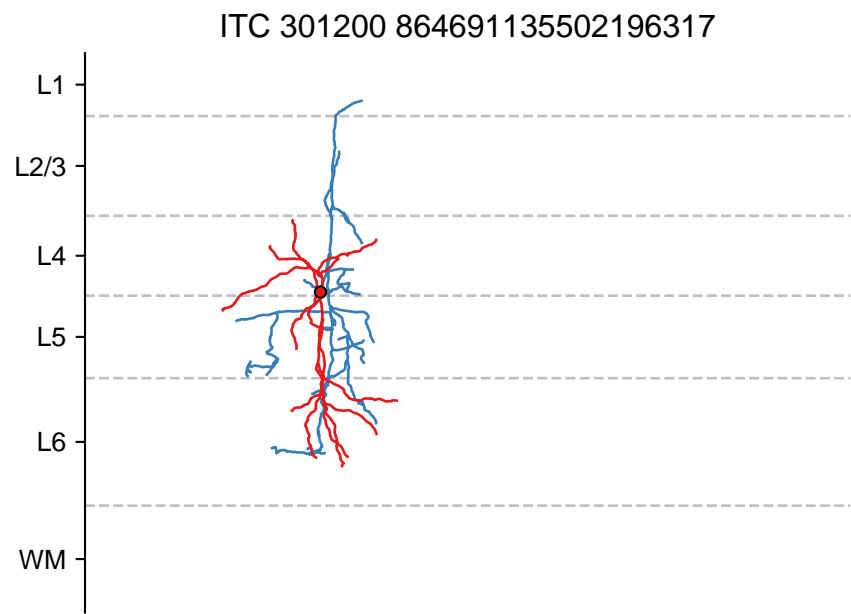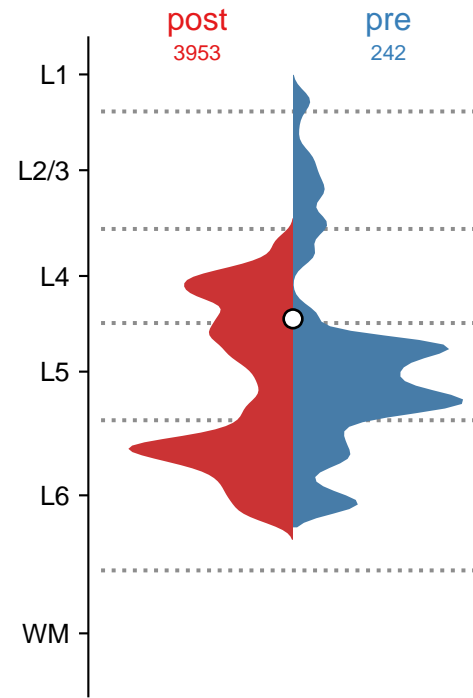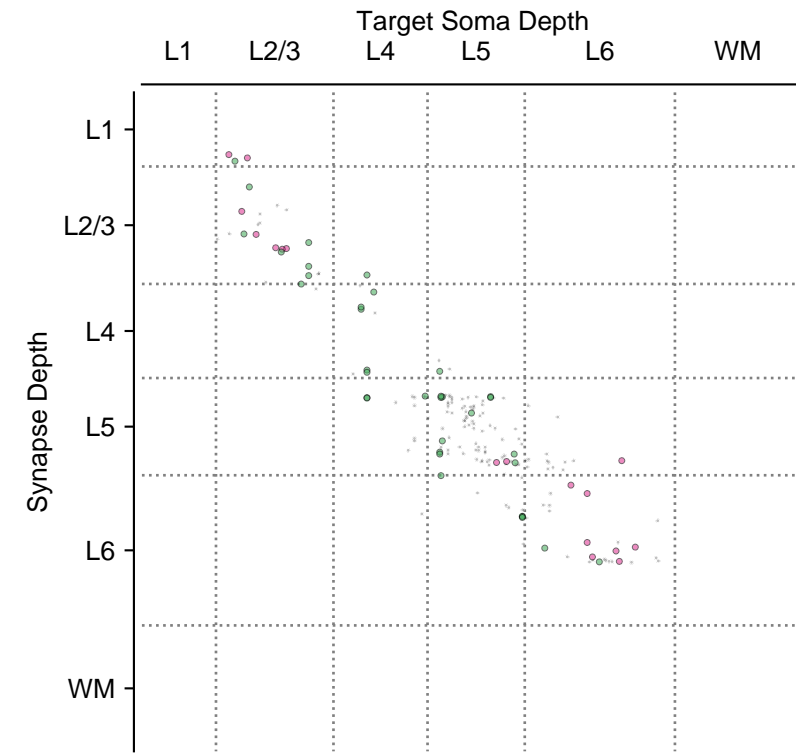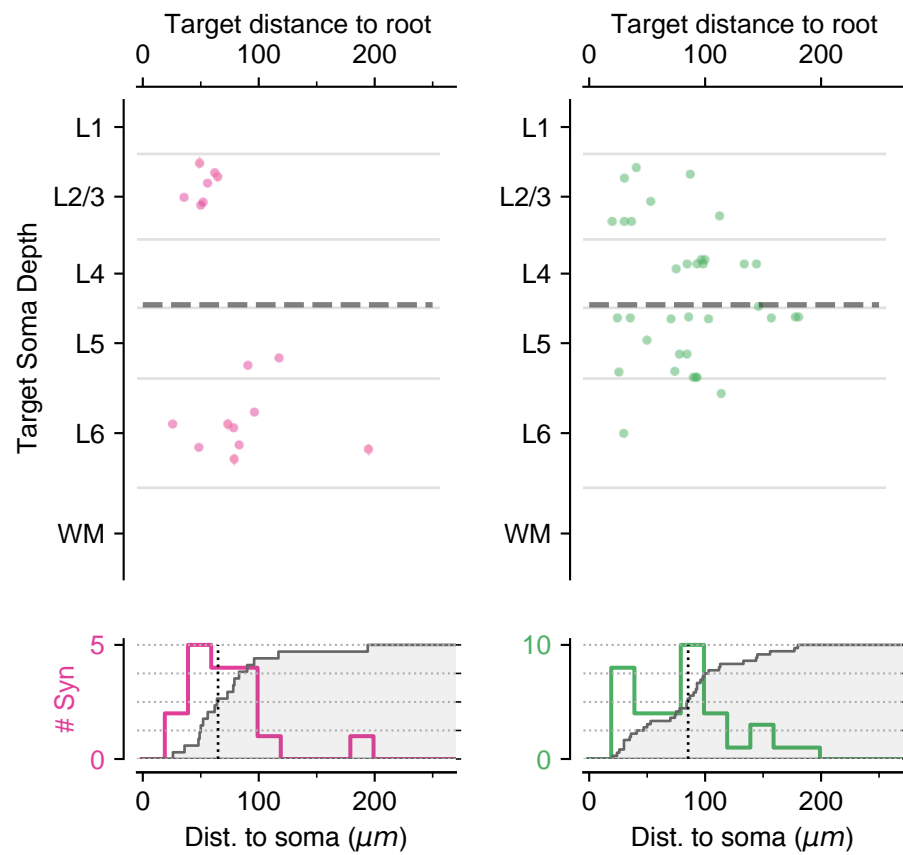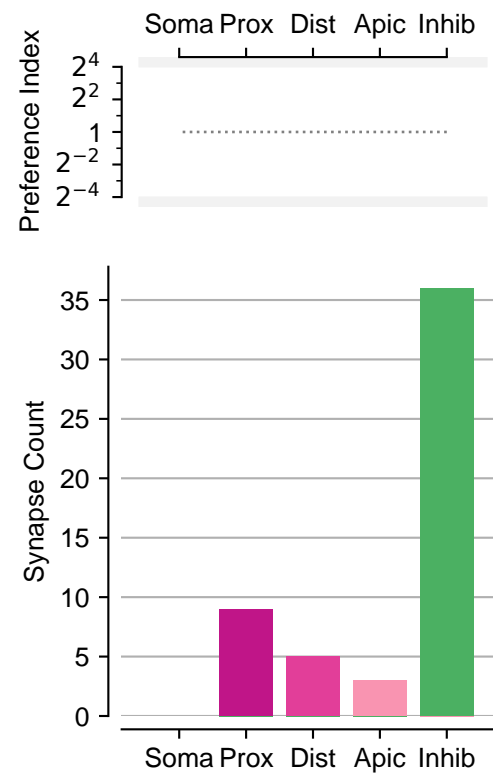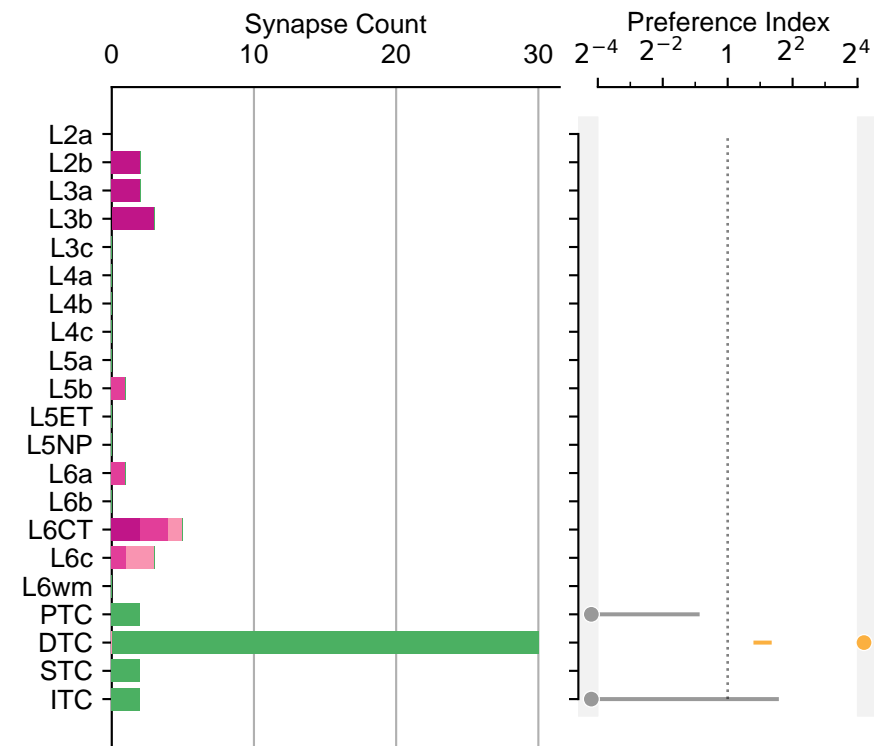

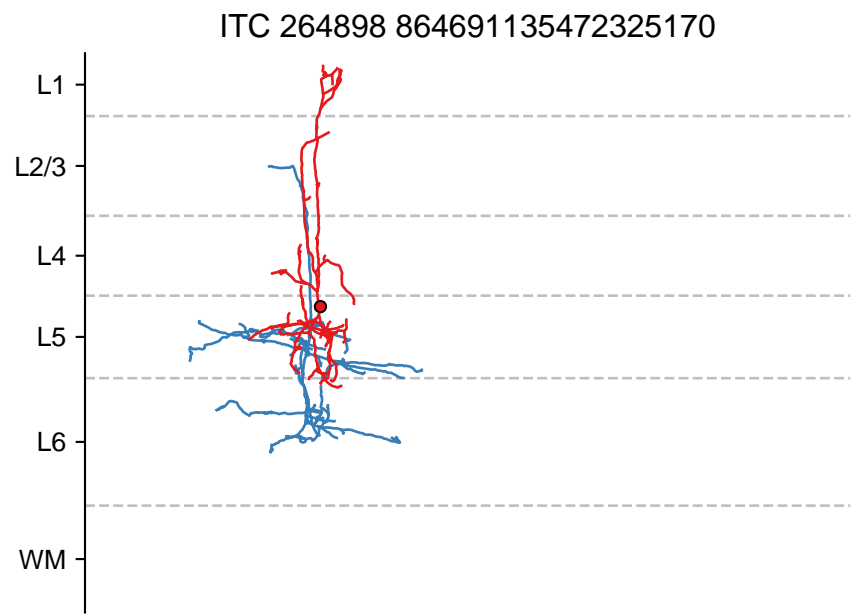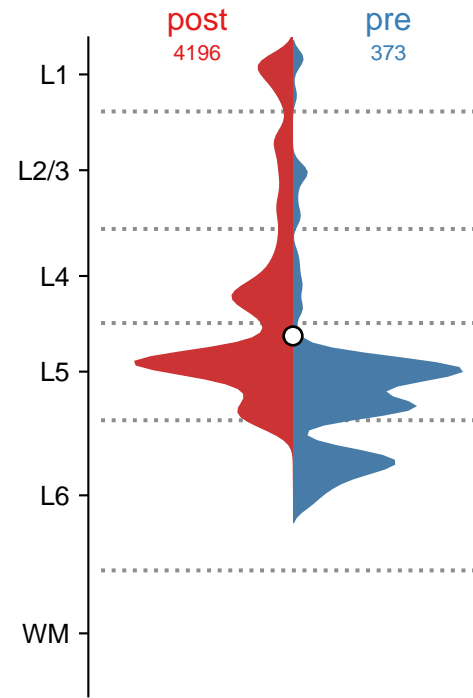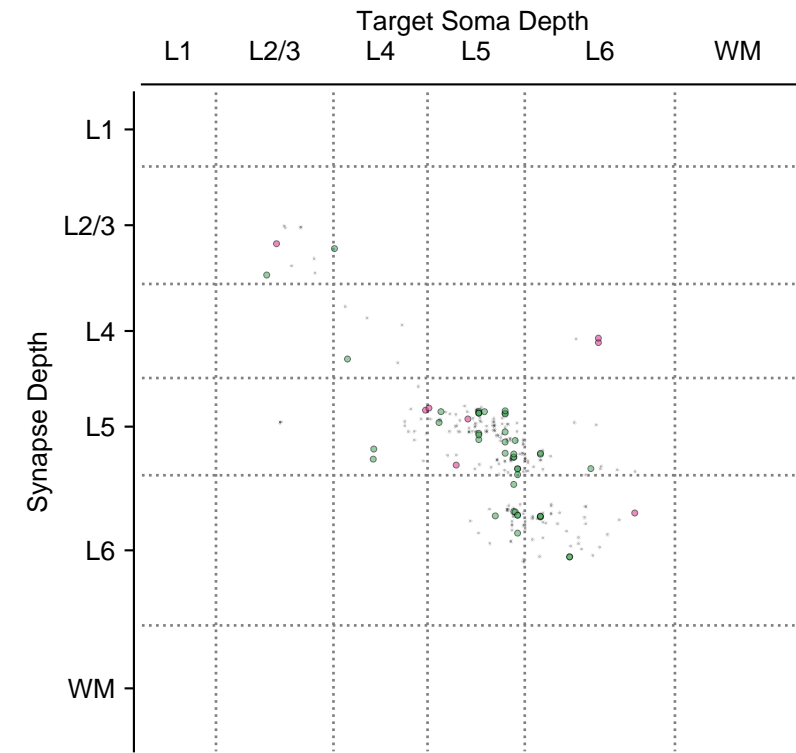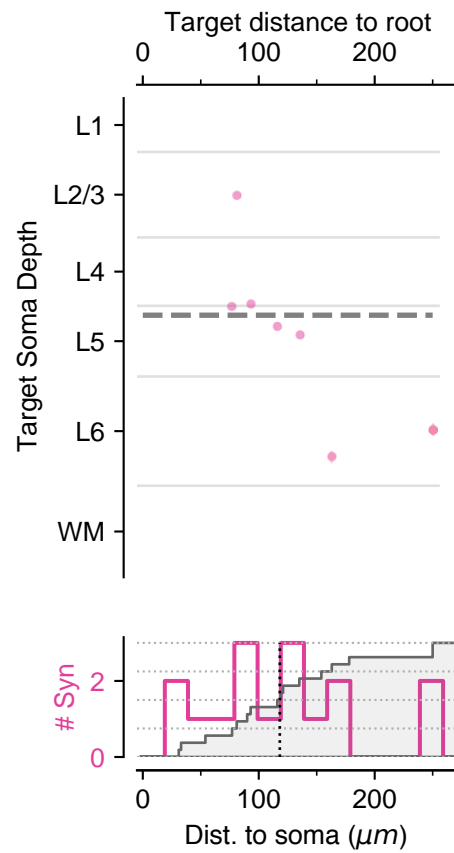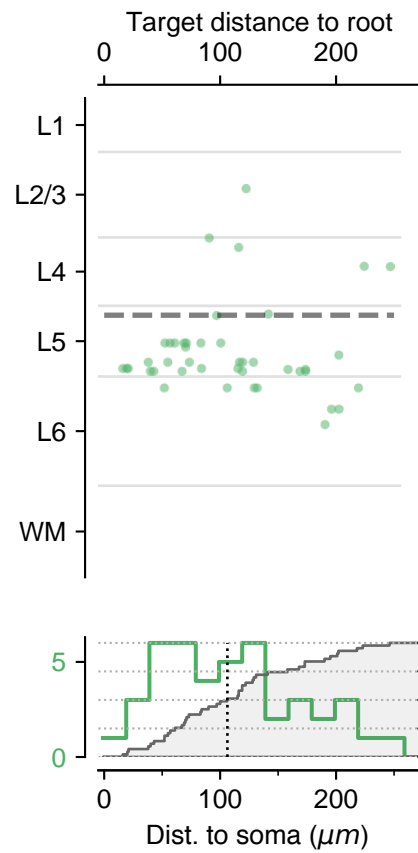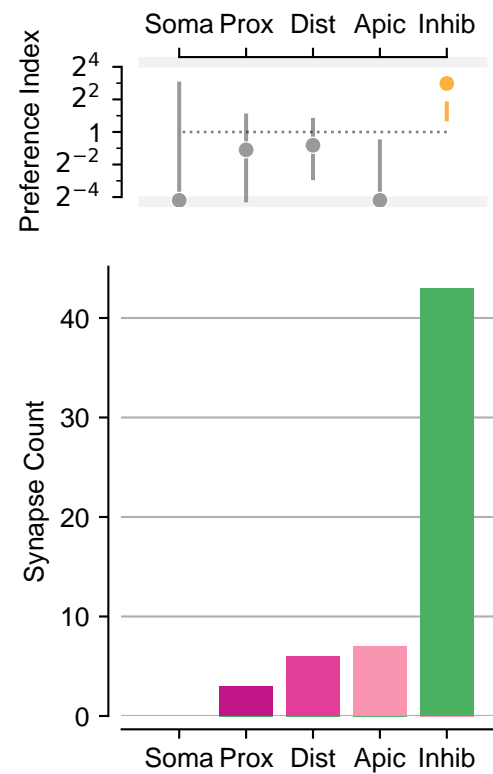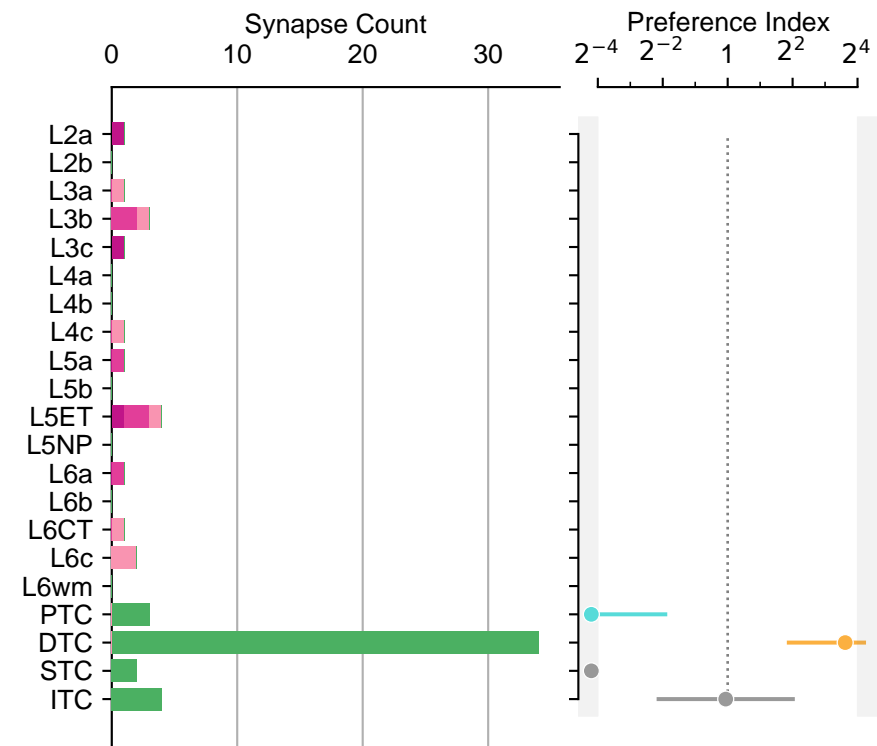

# Group 20 (InhTC<sup>prox</sup>)

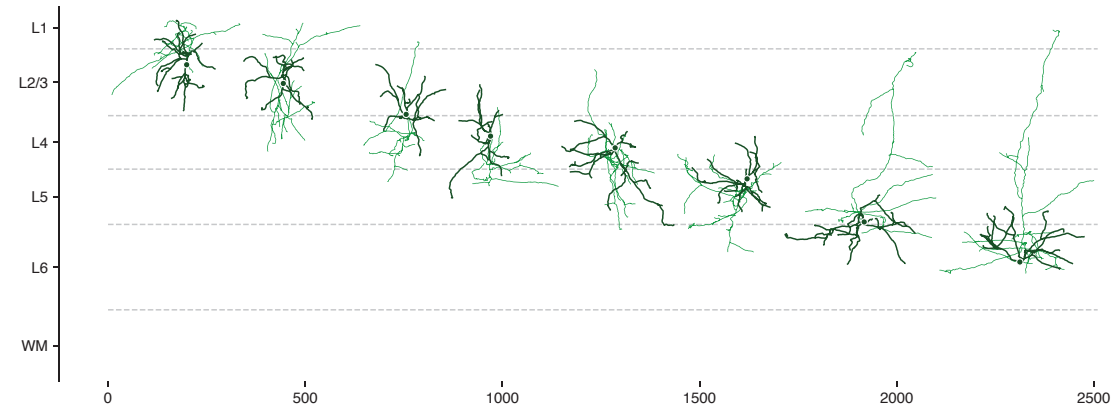

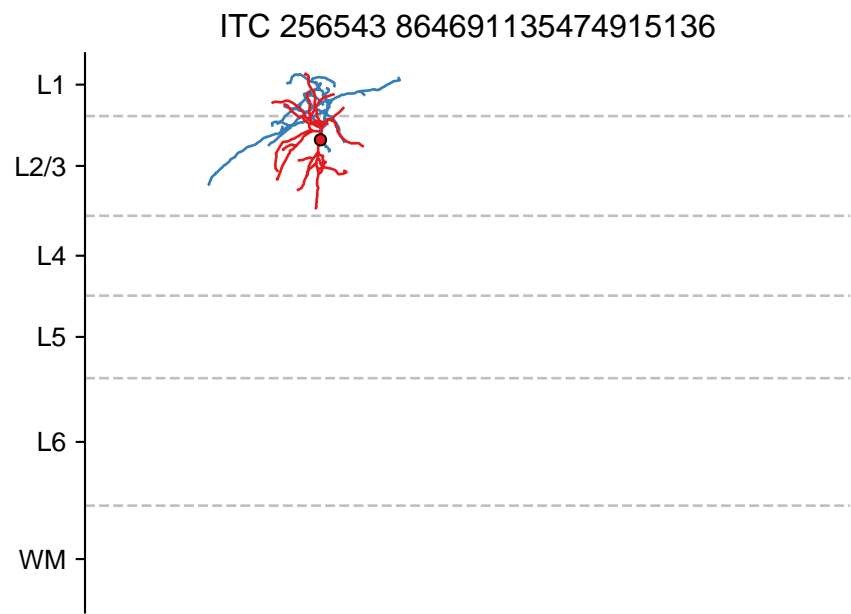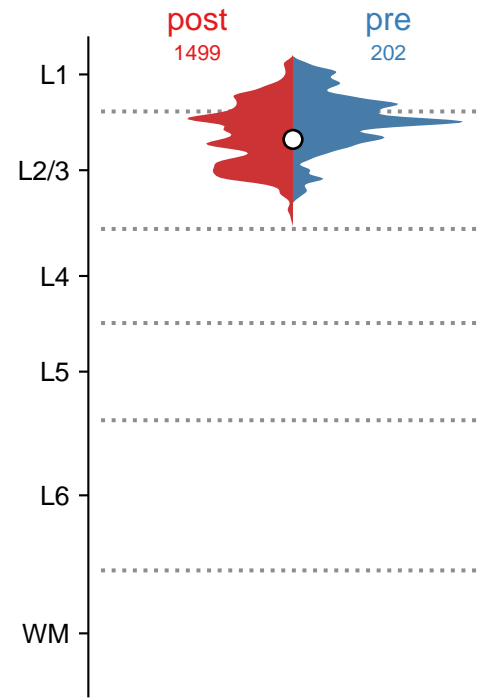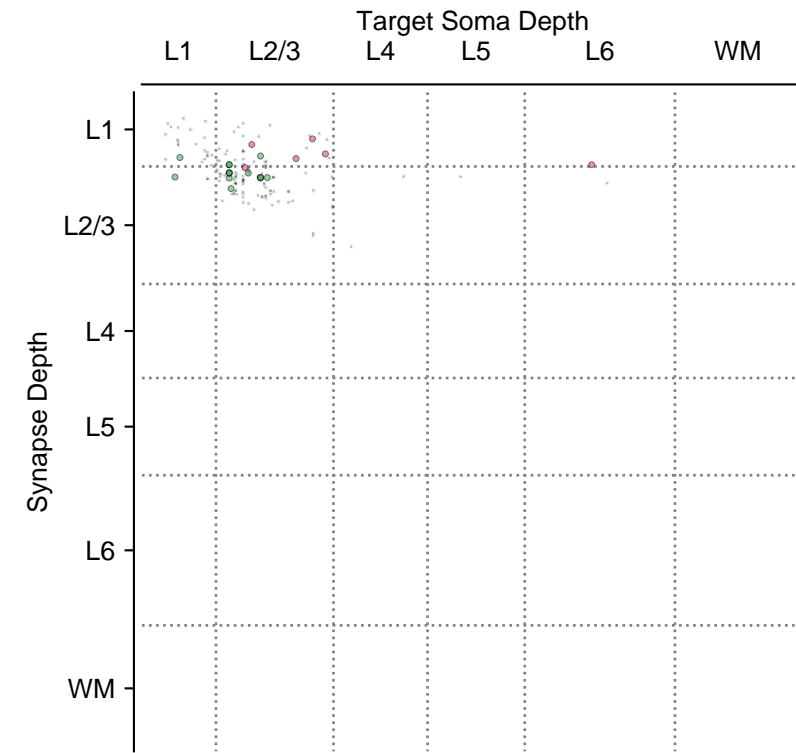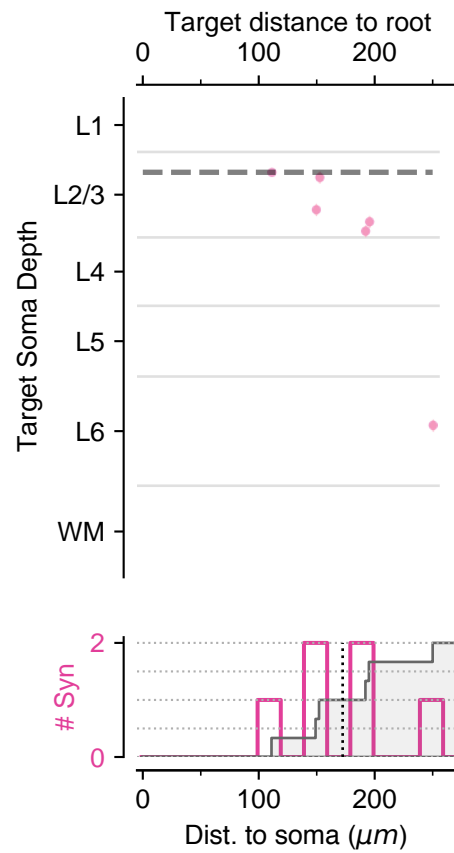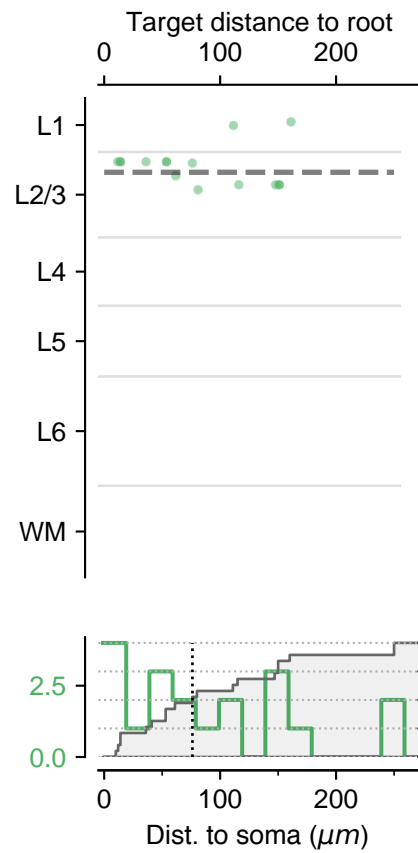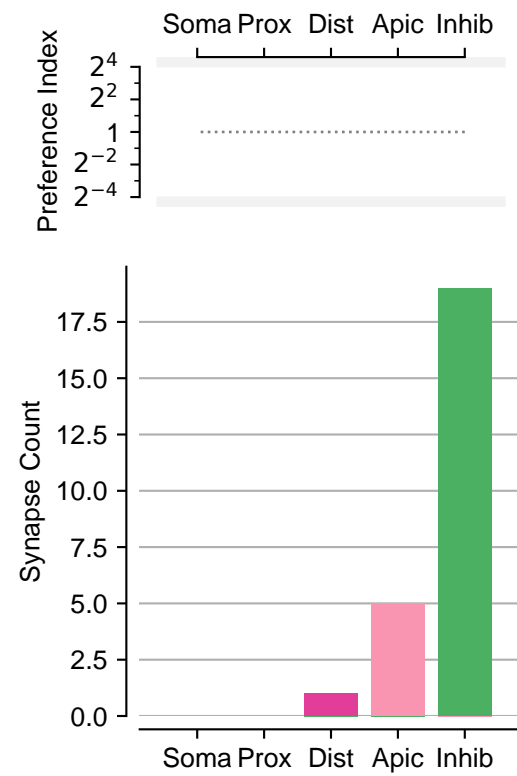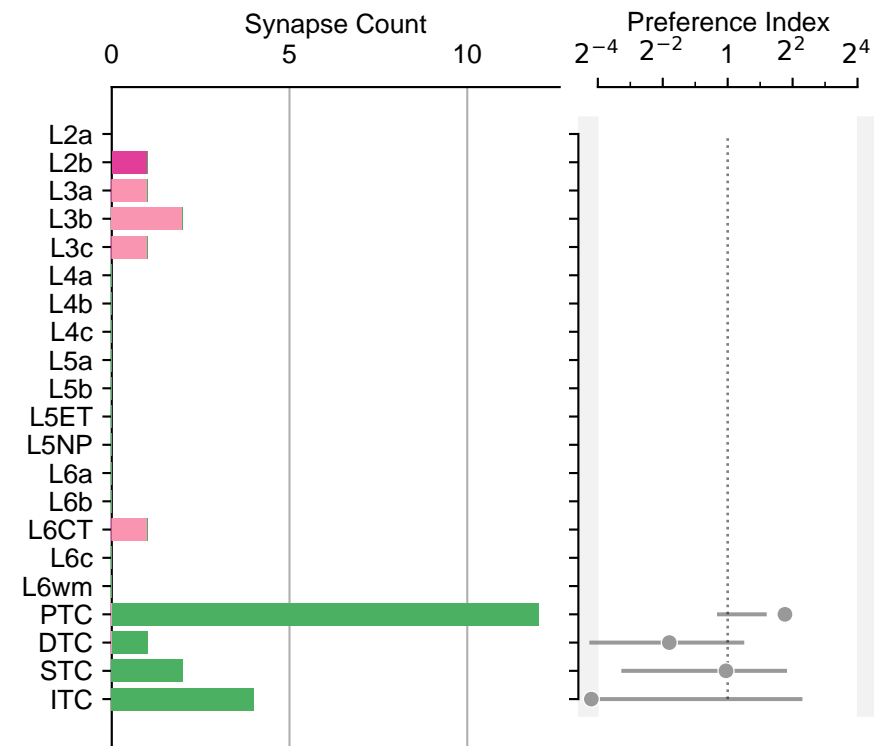

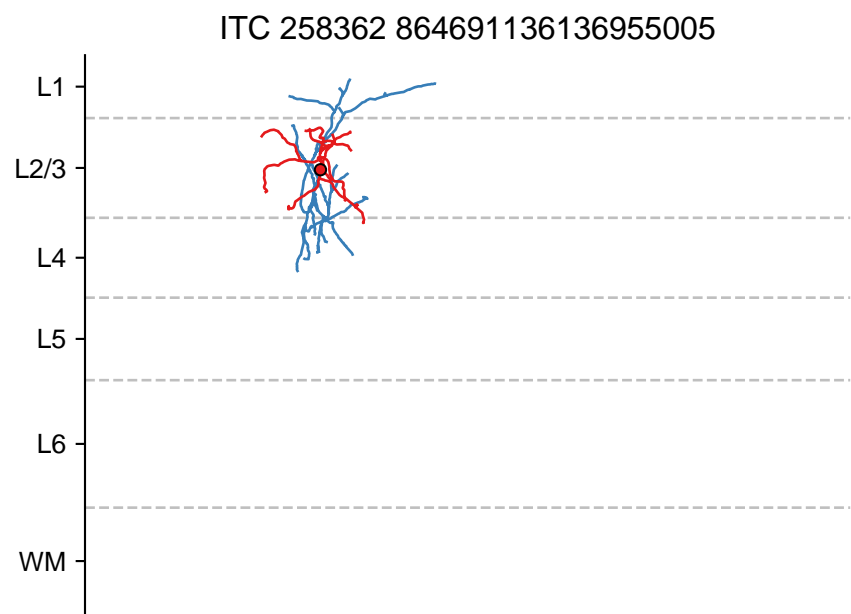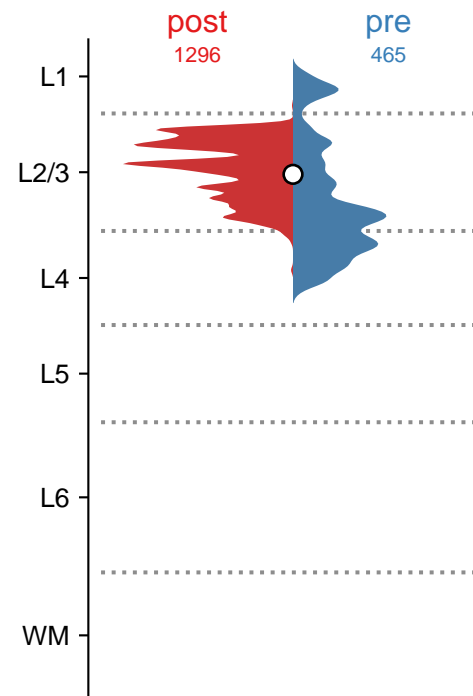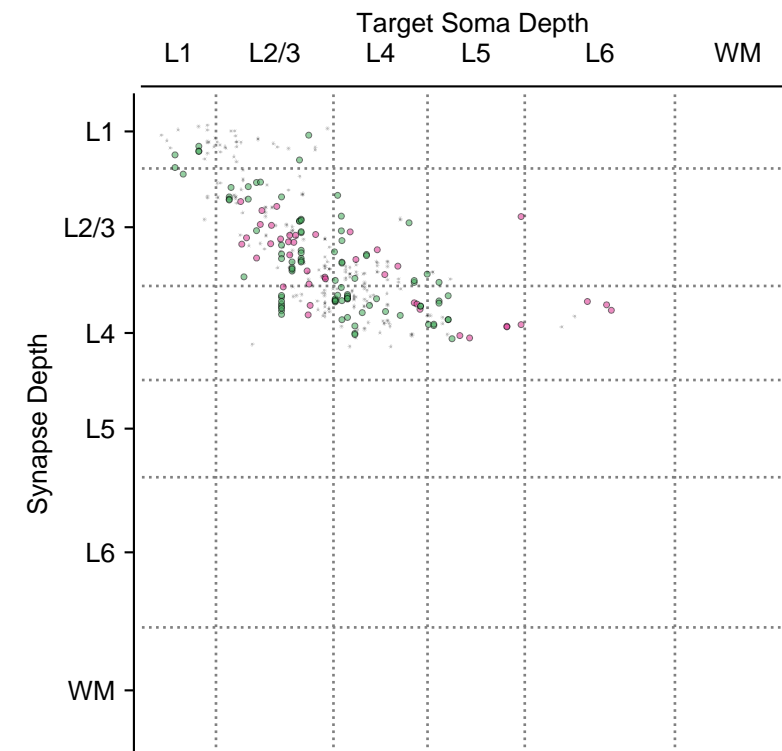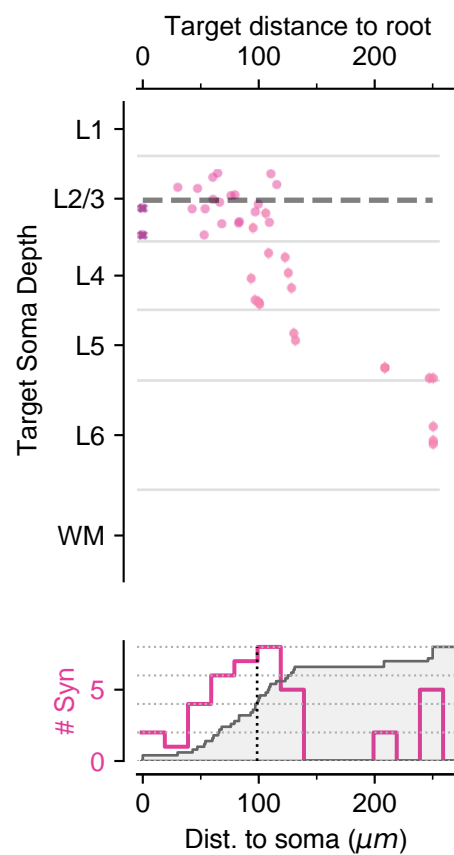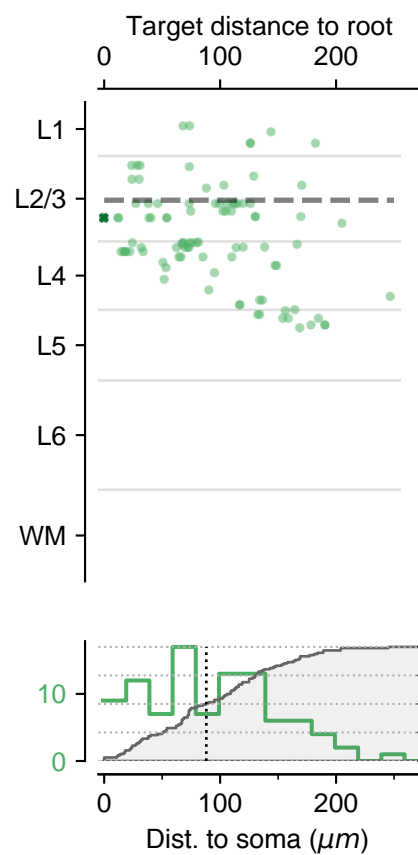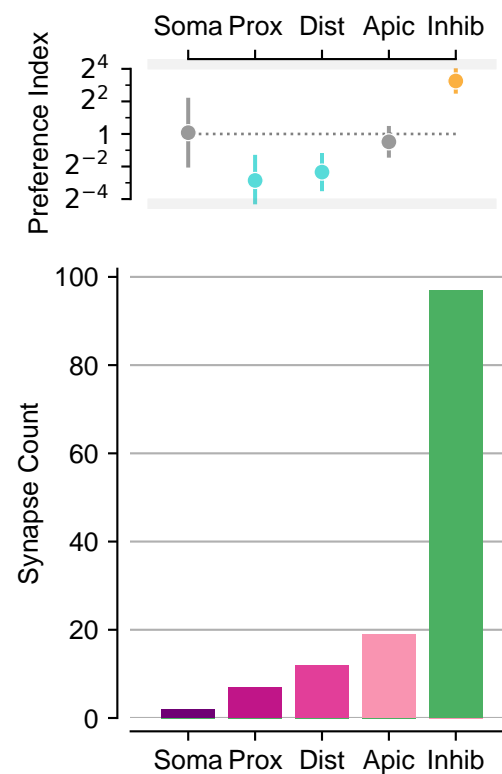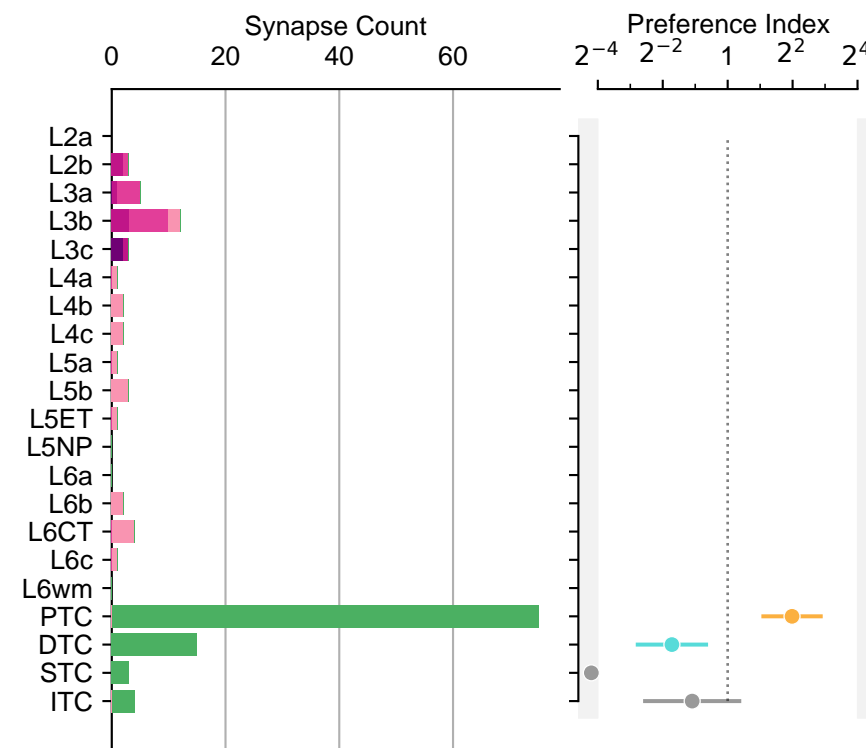

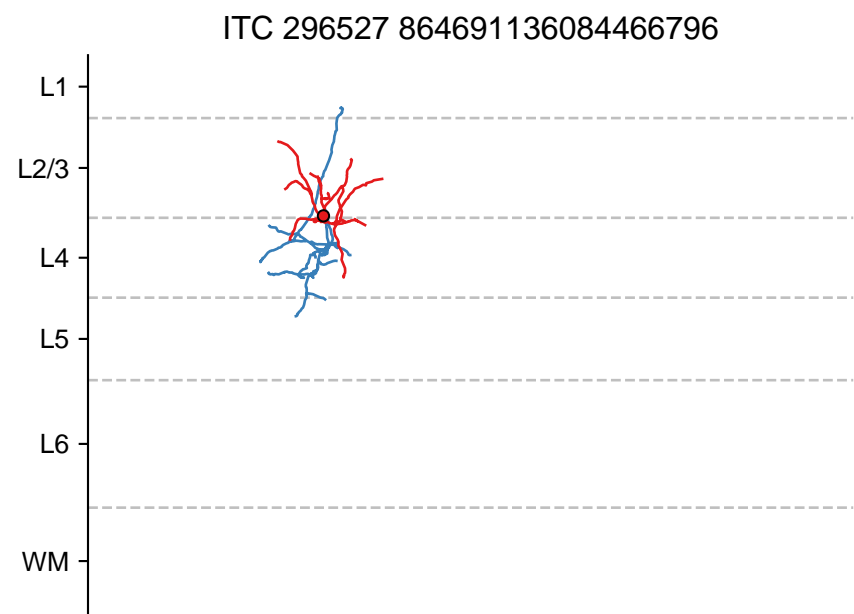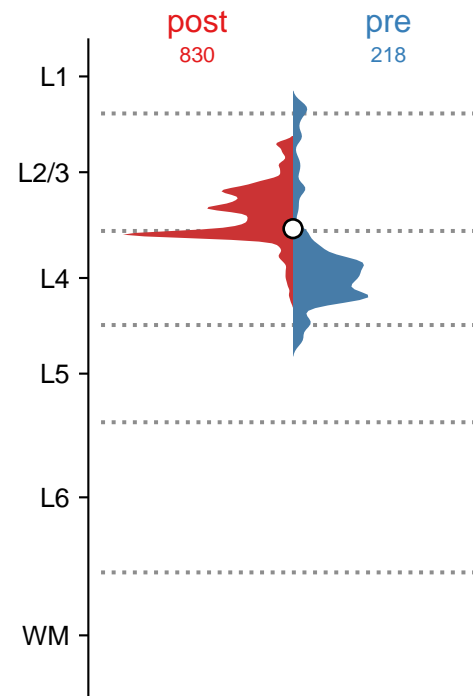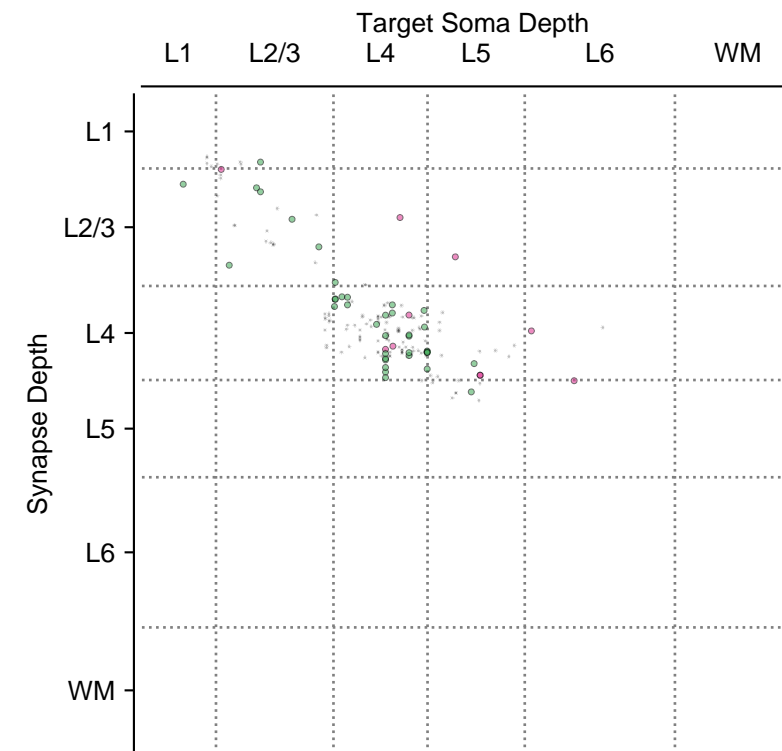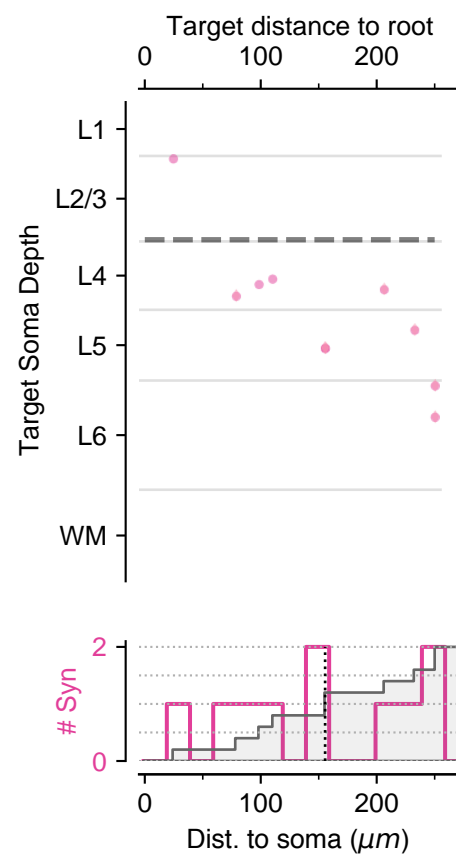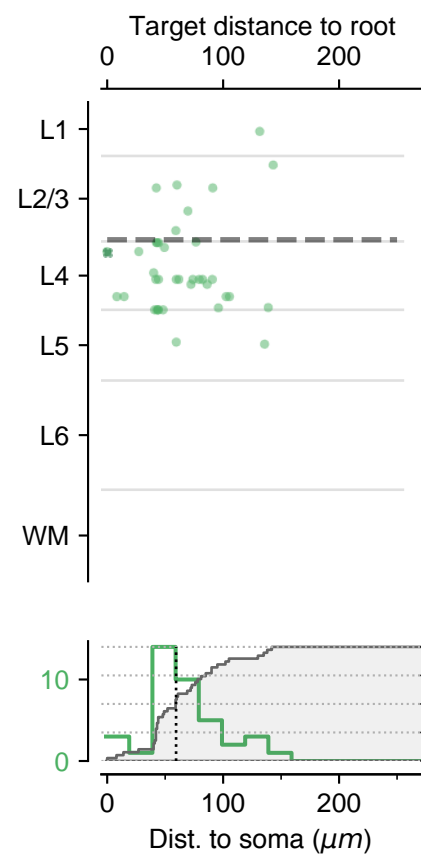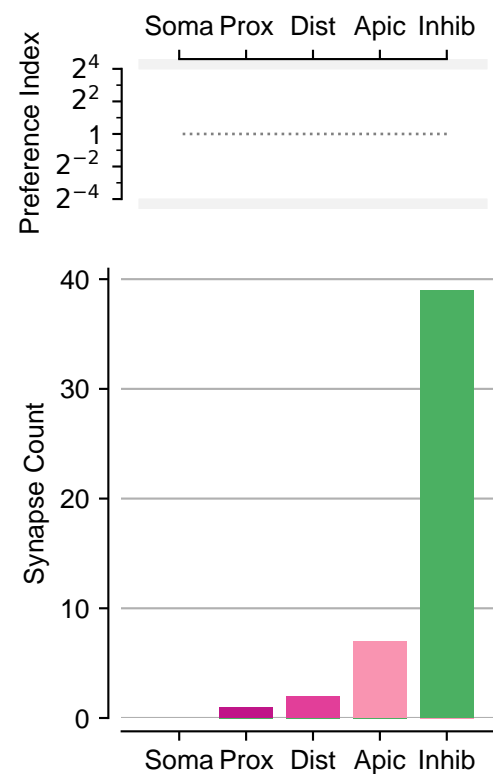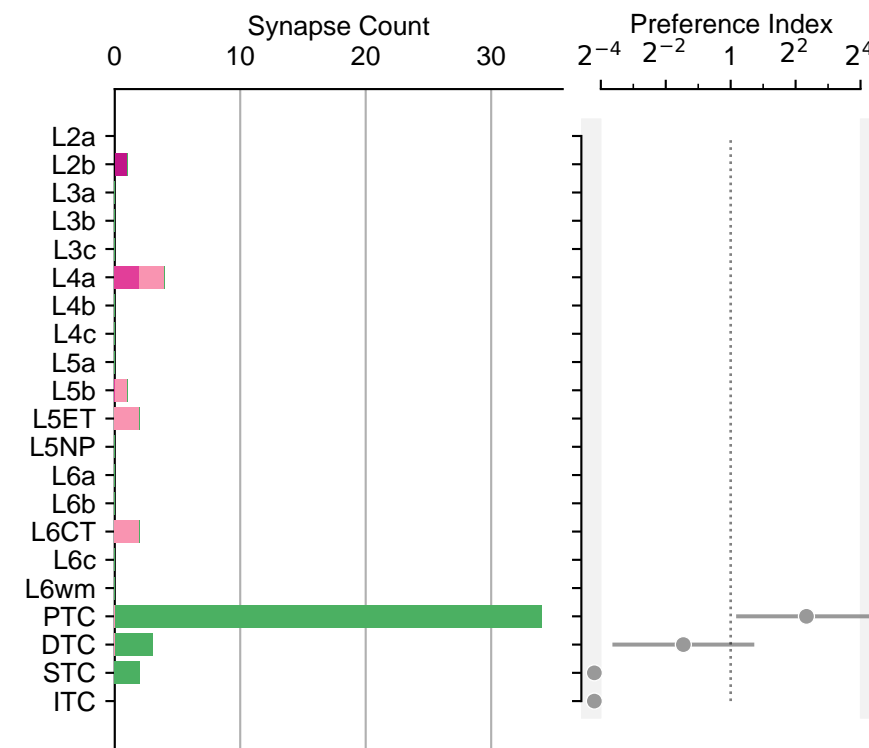

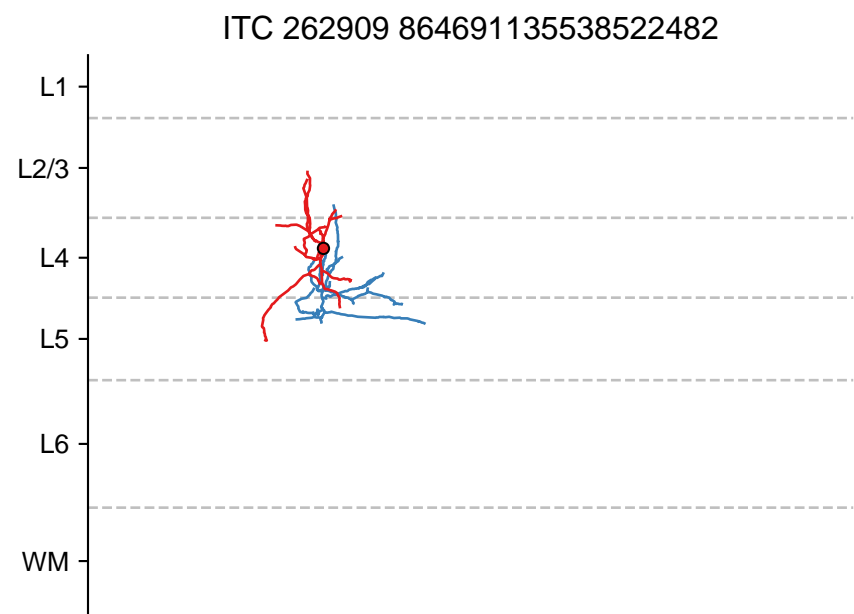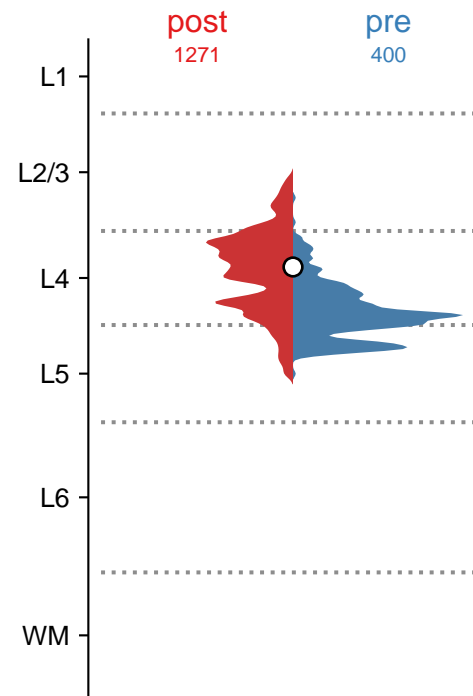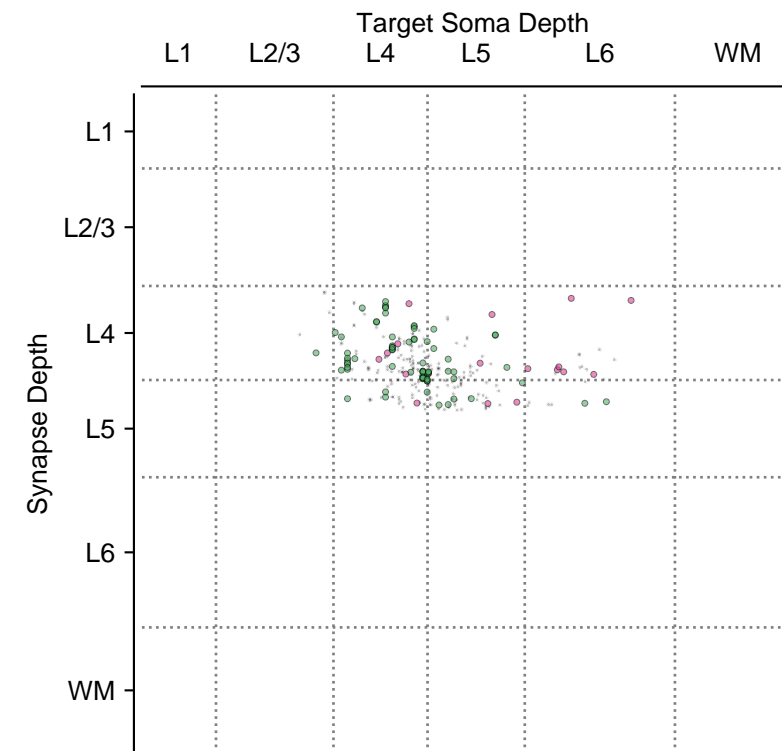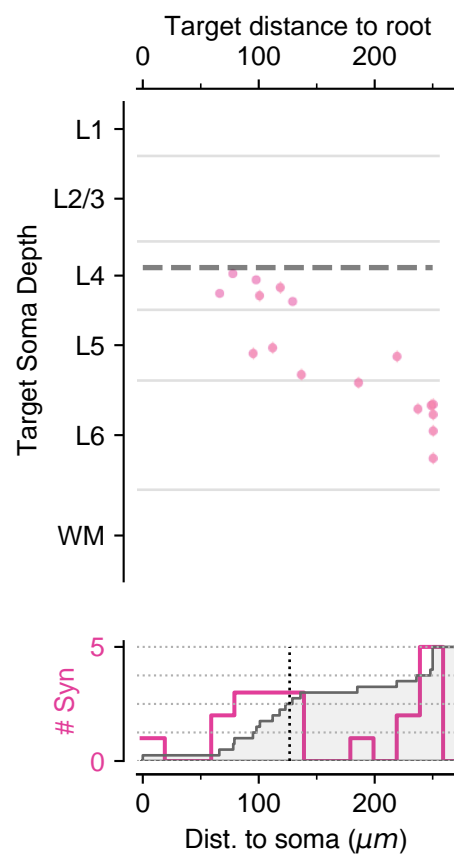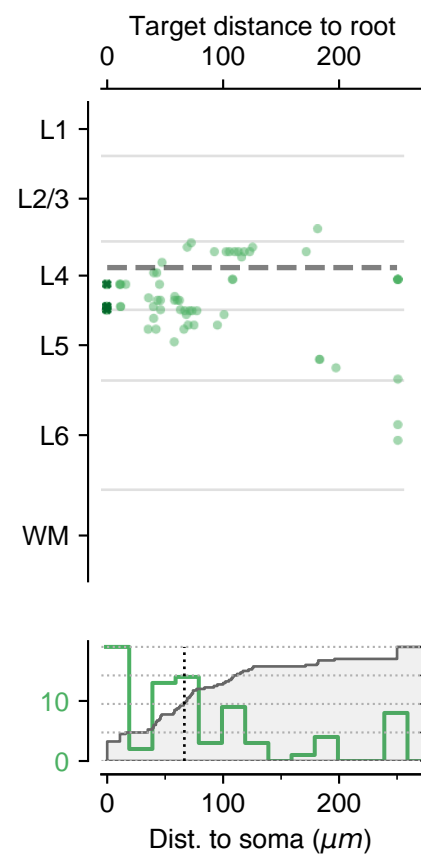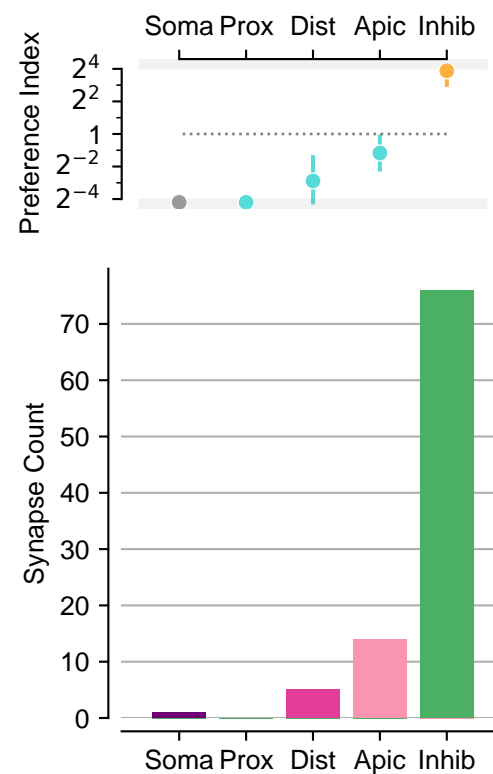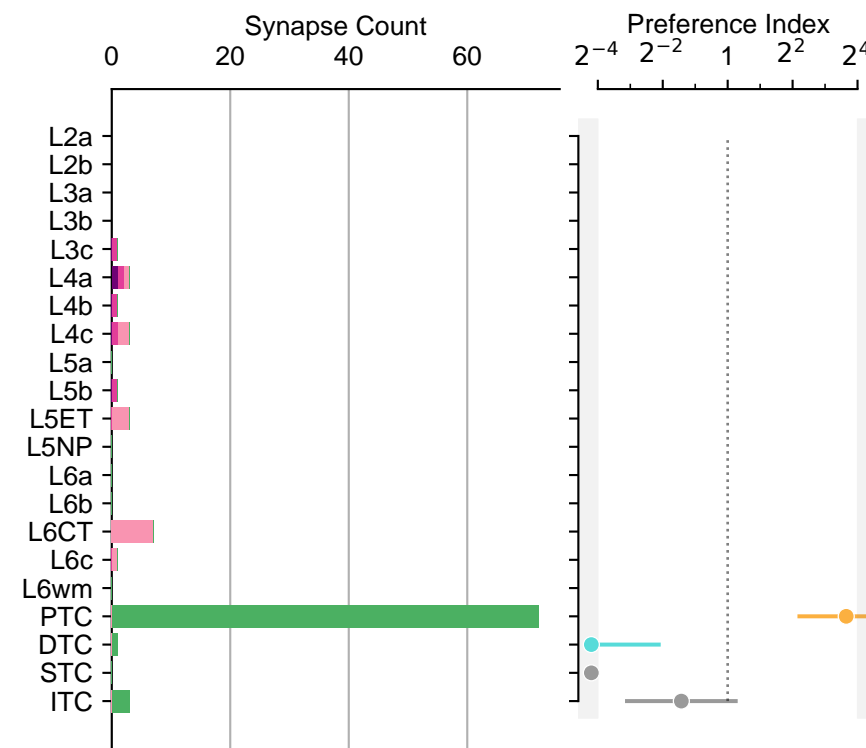



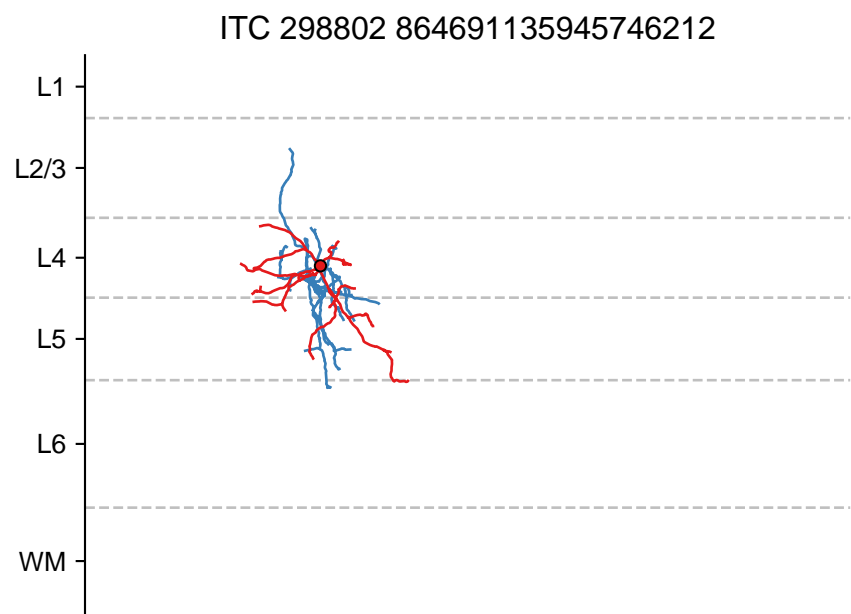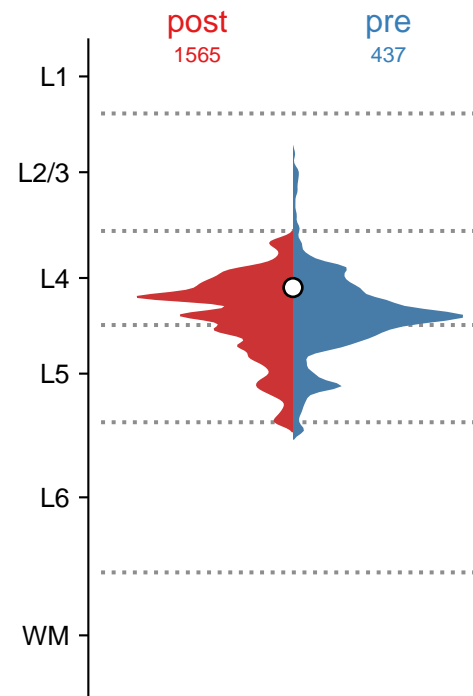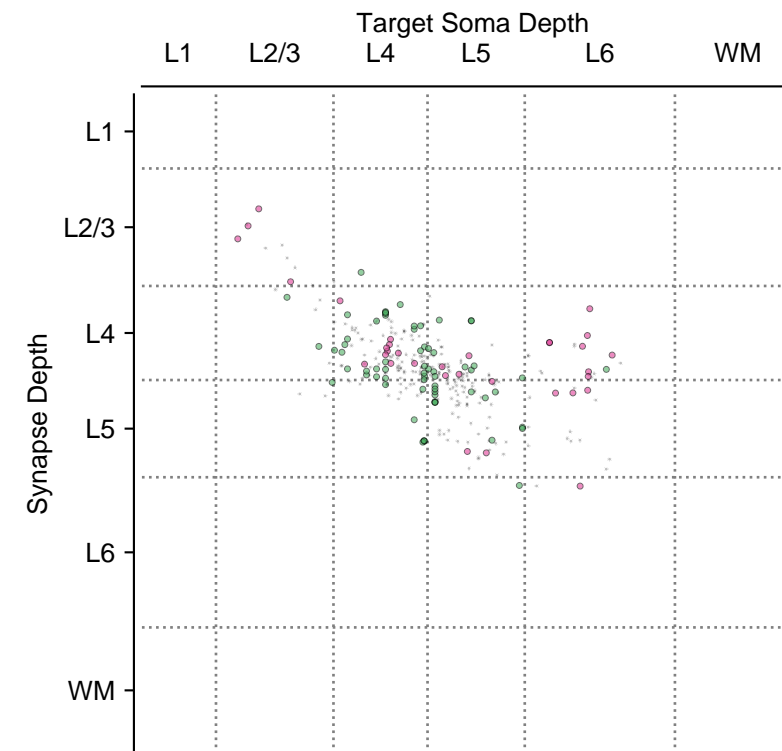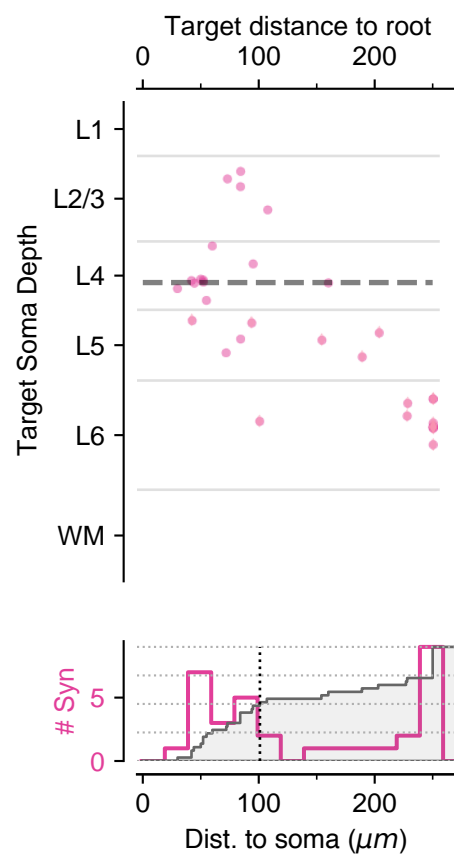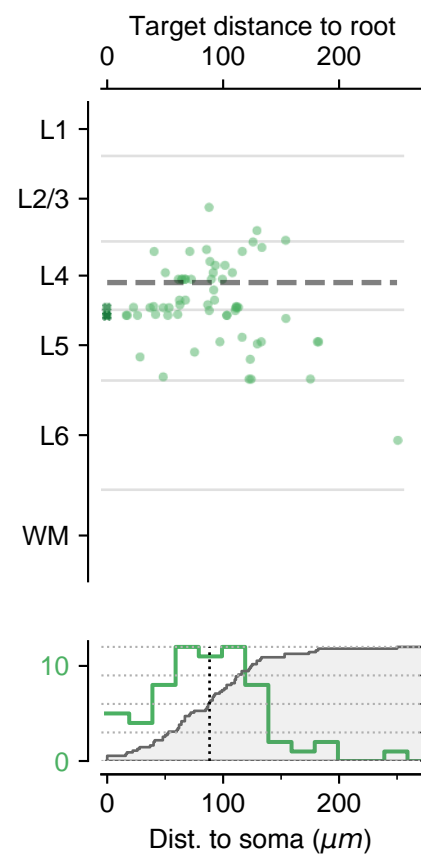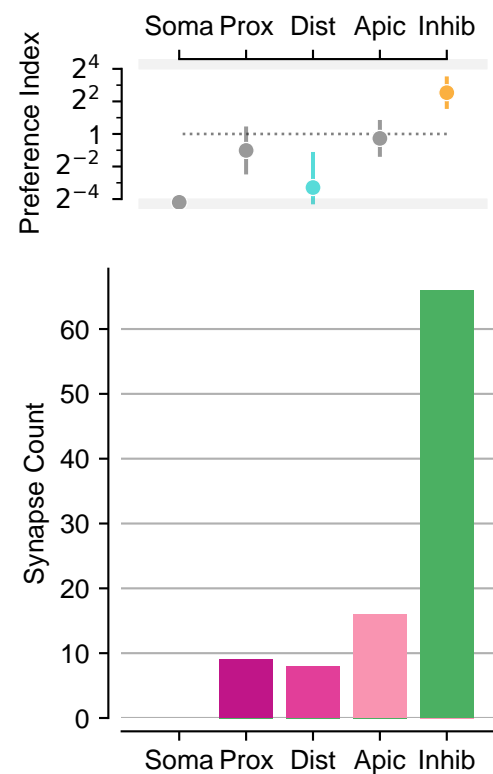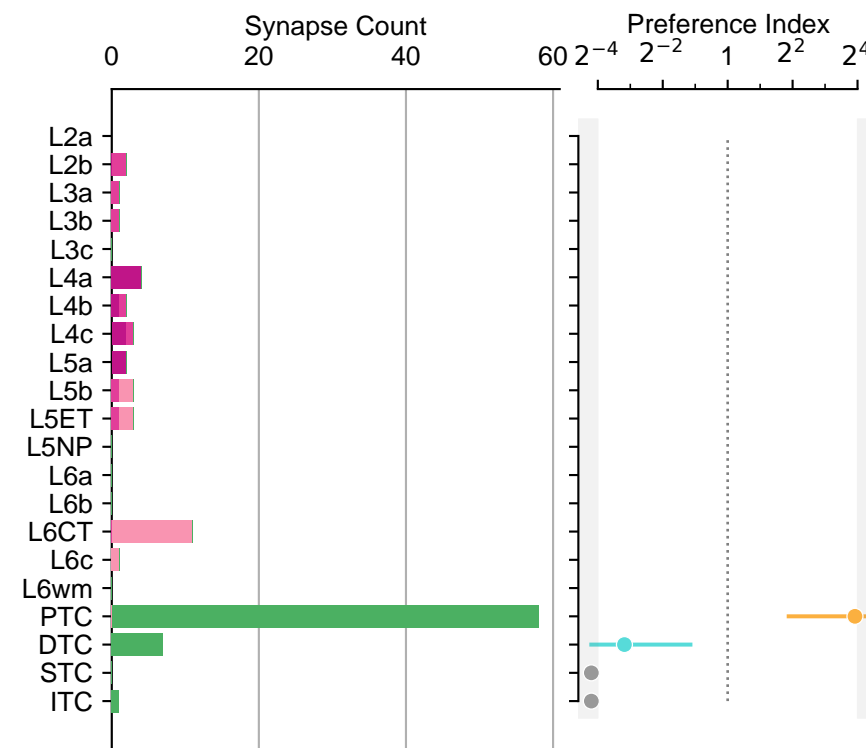

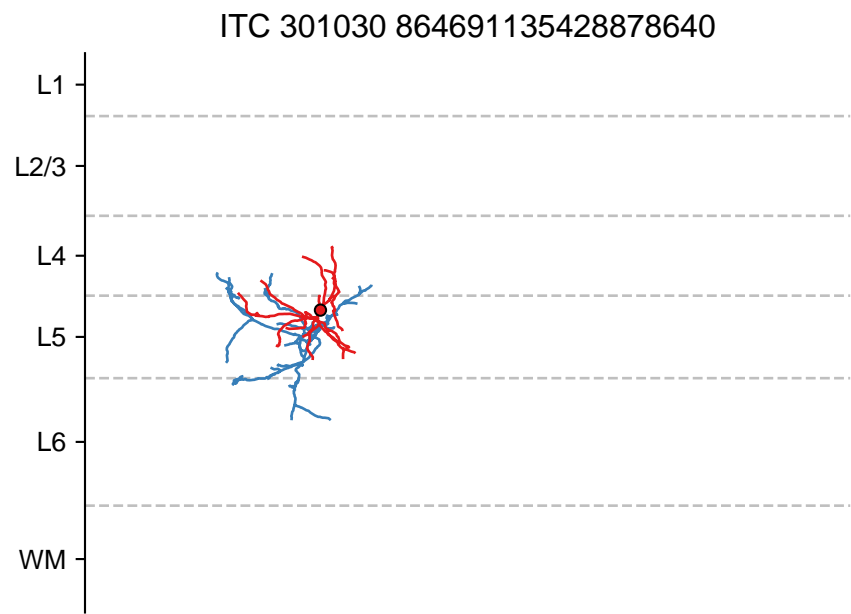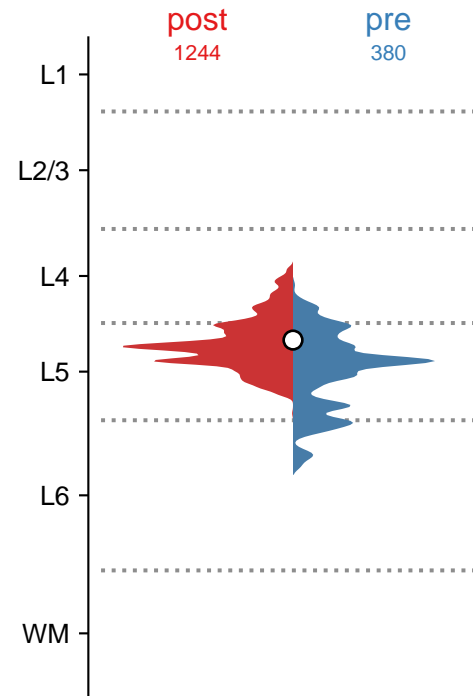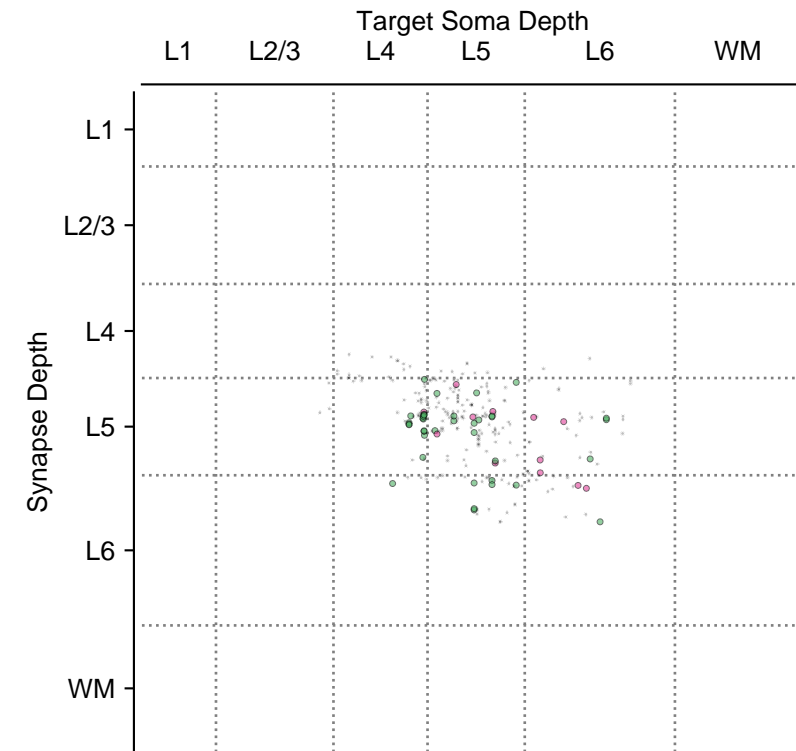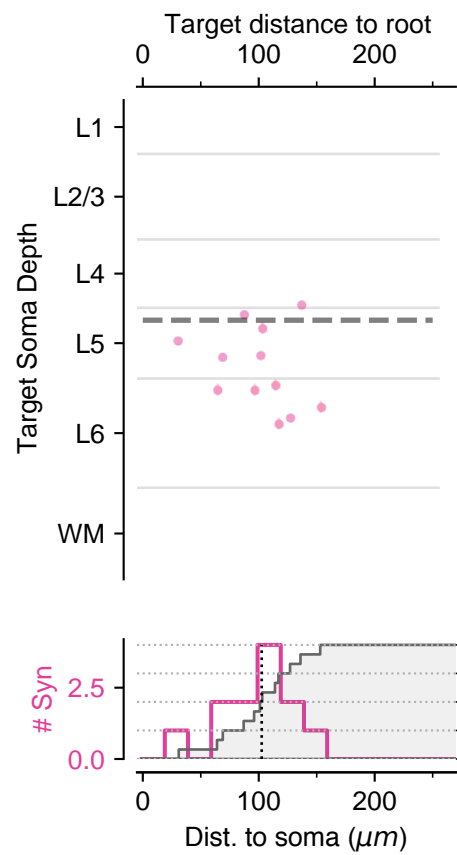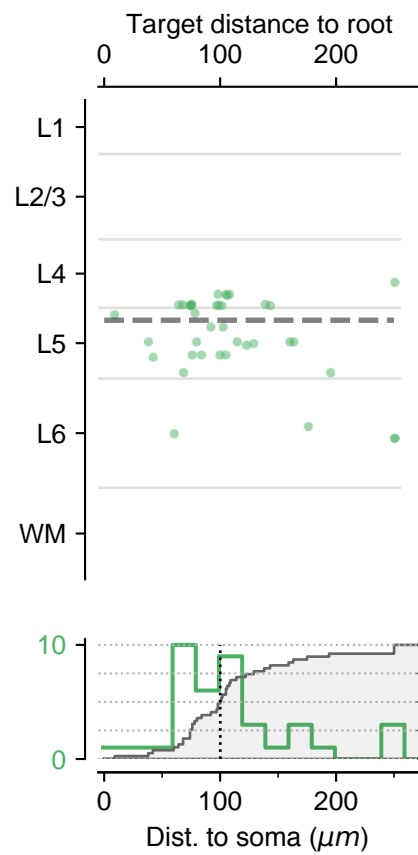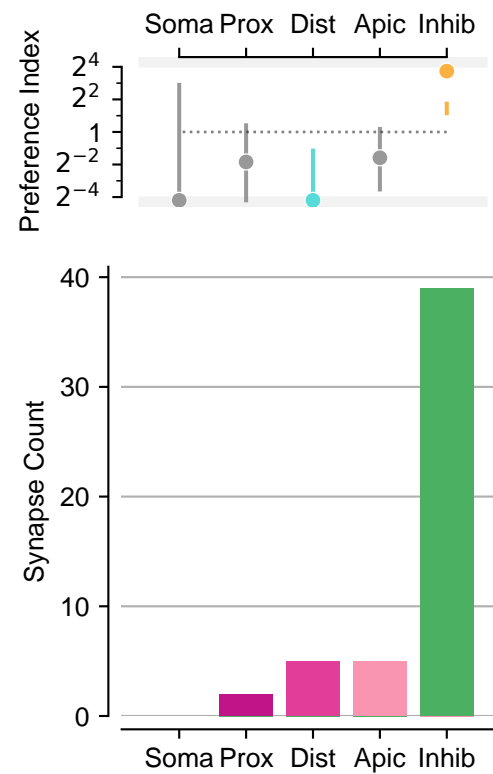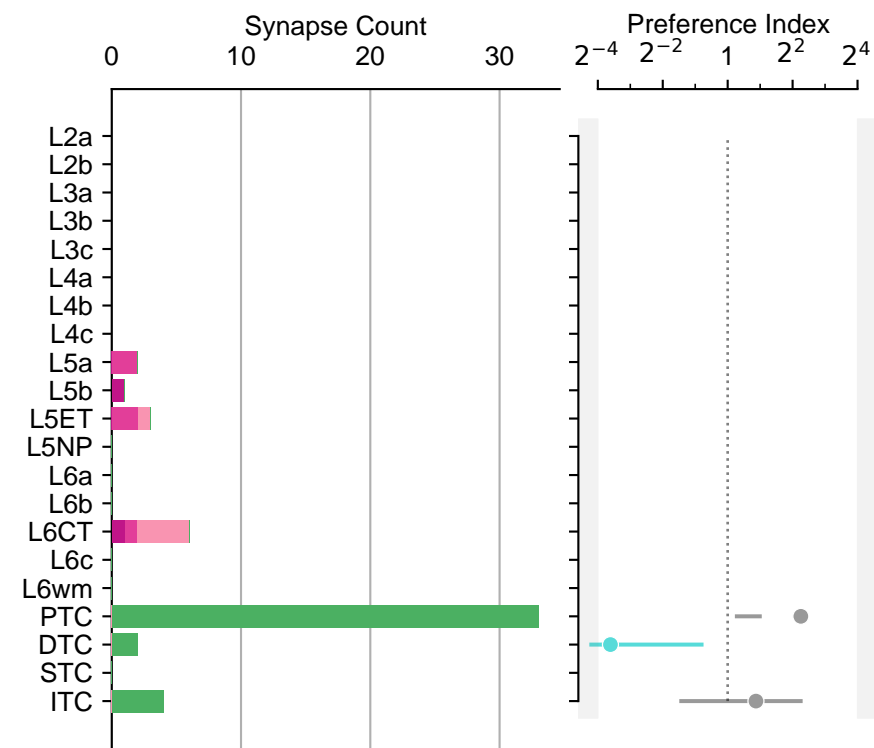

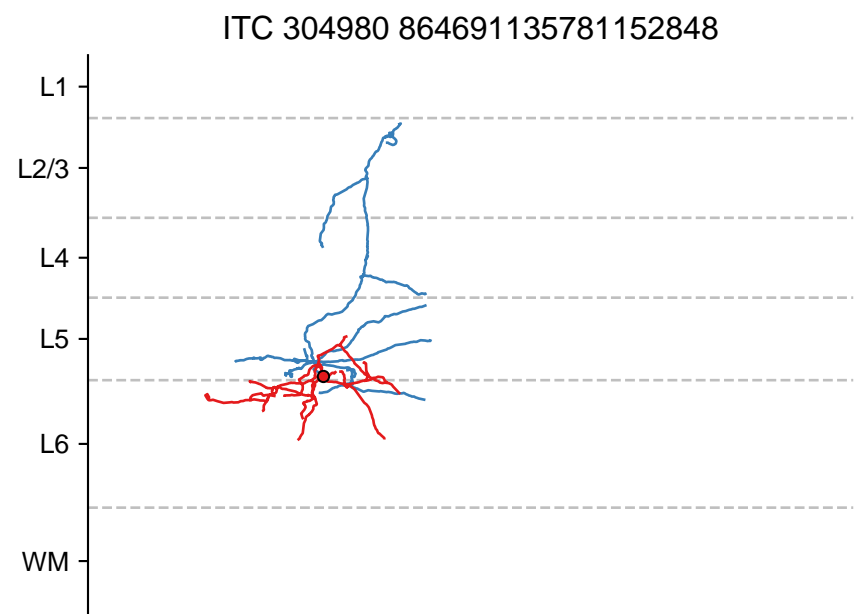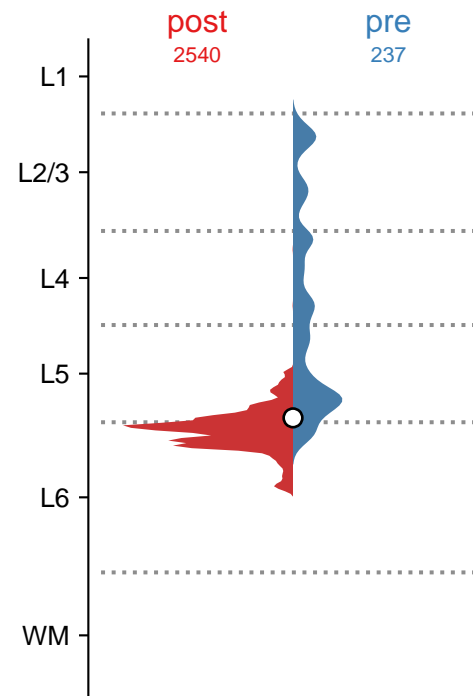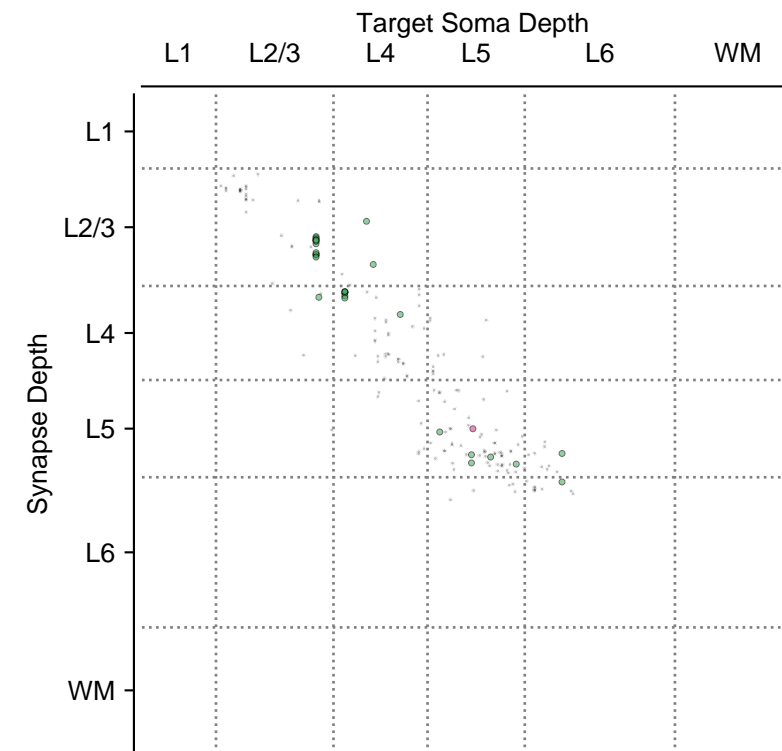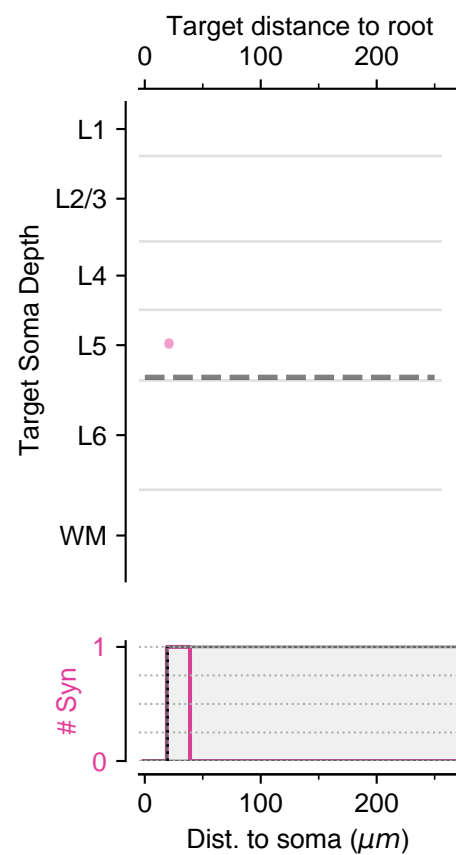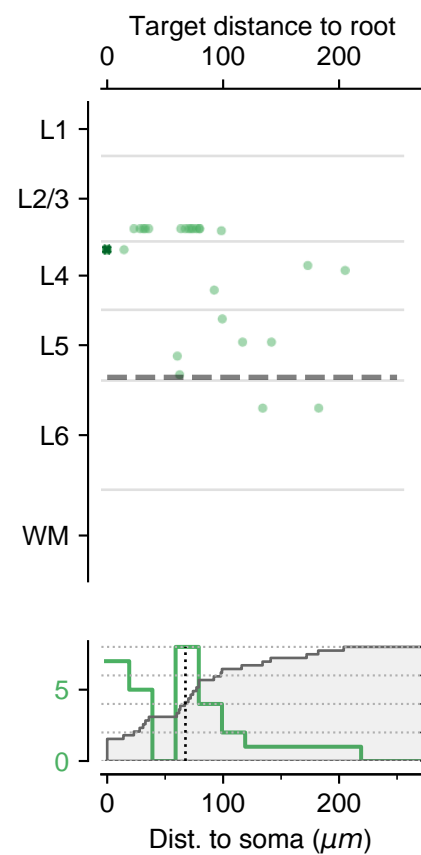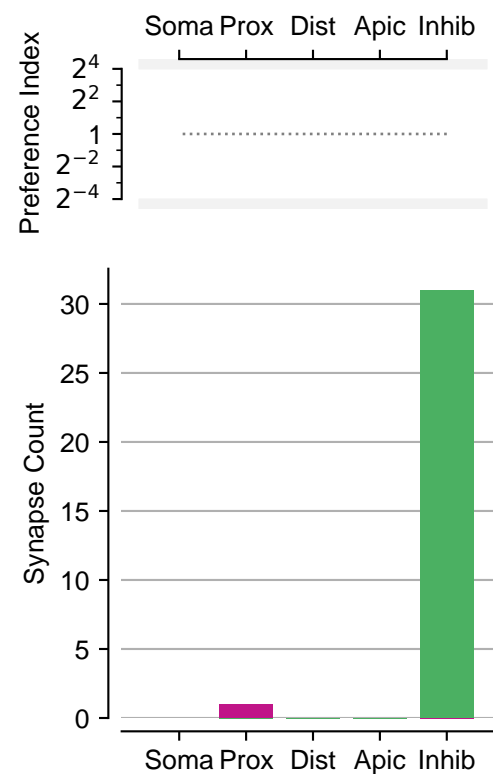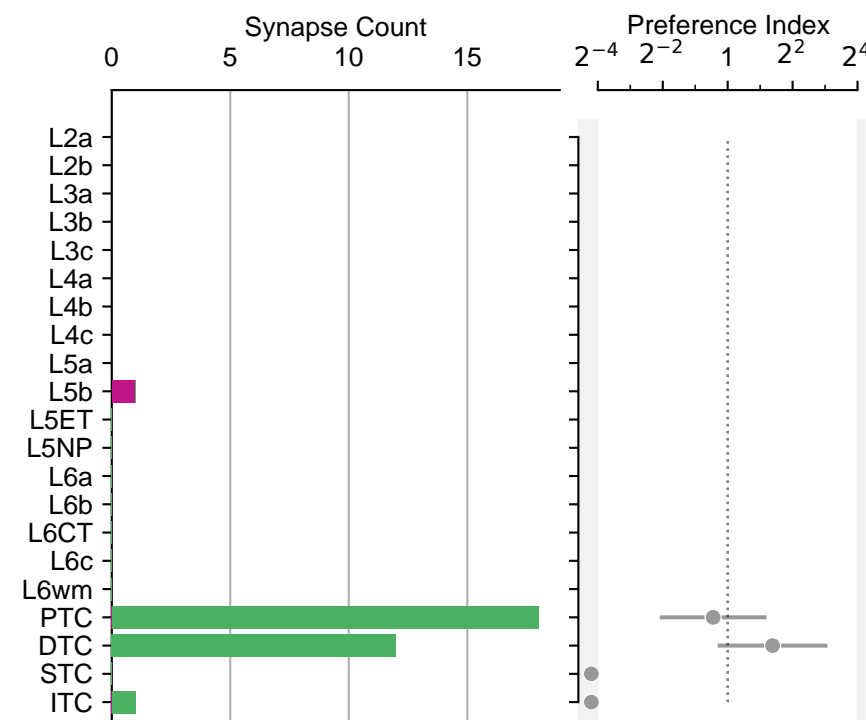

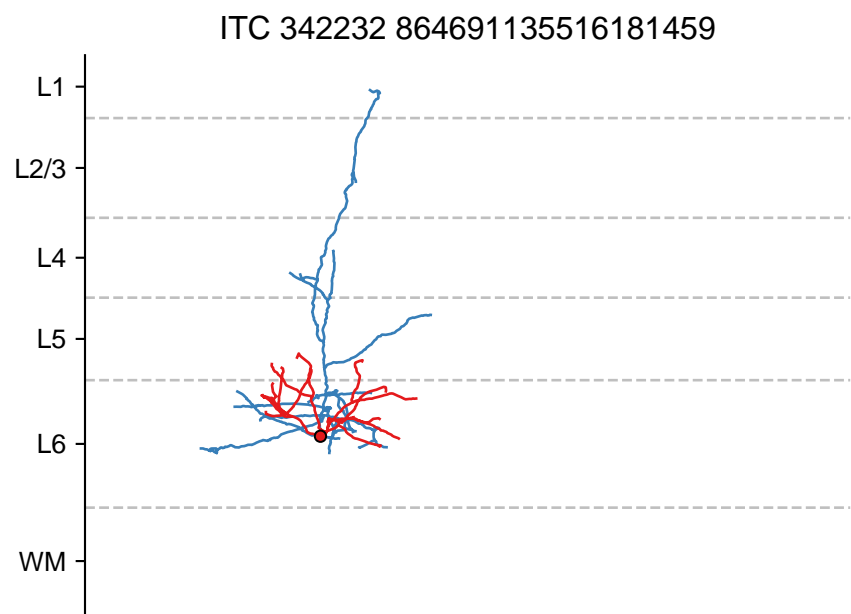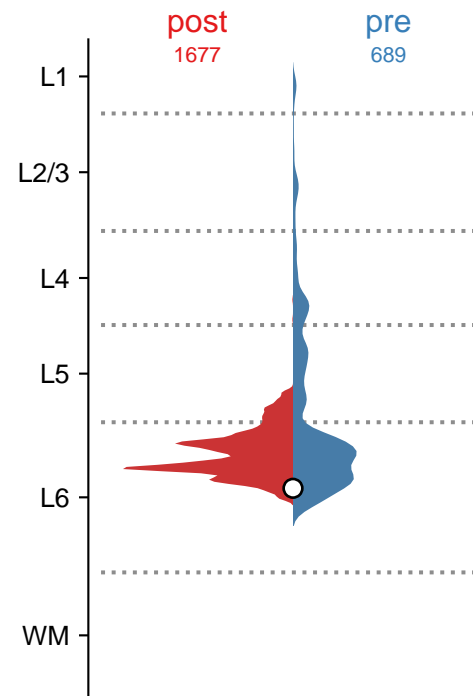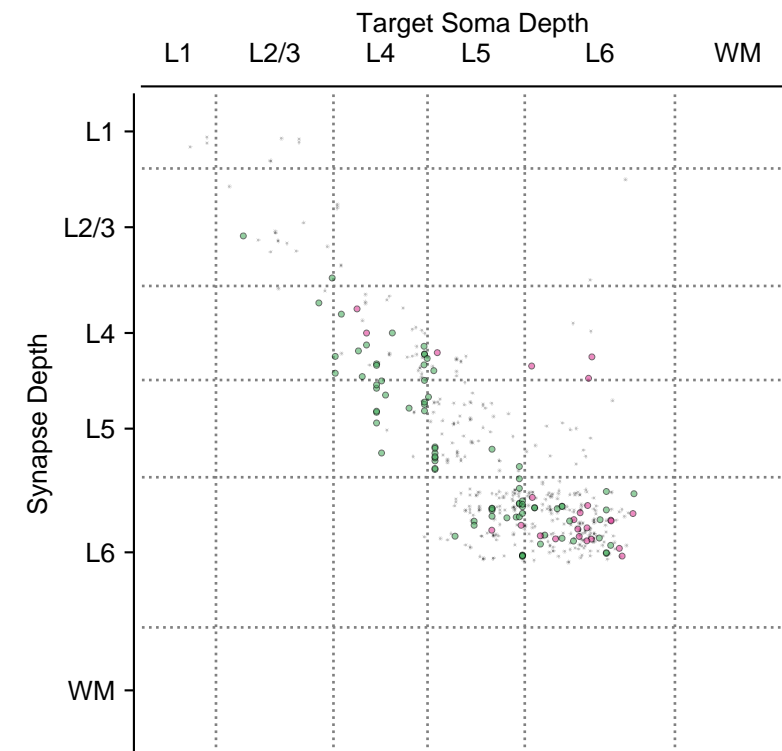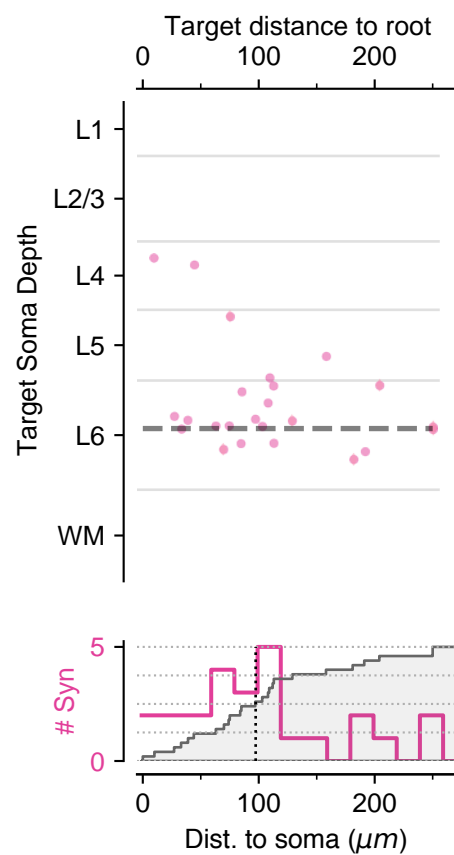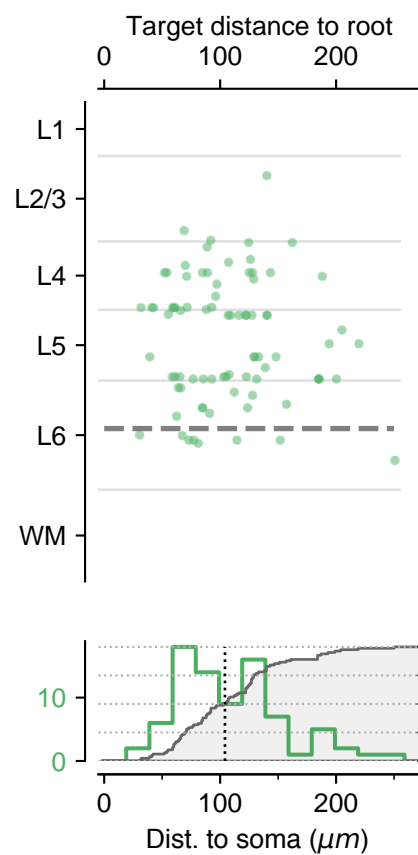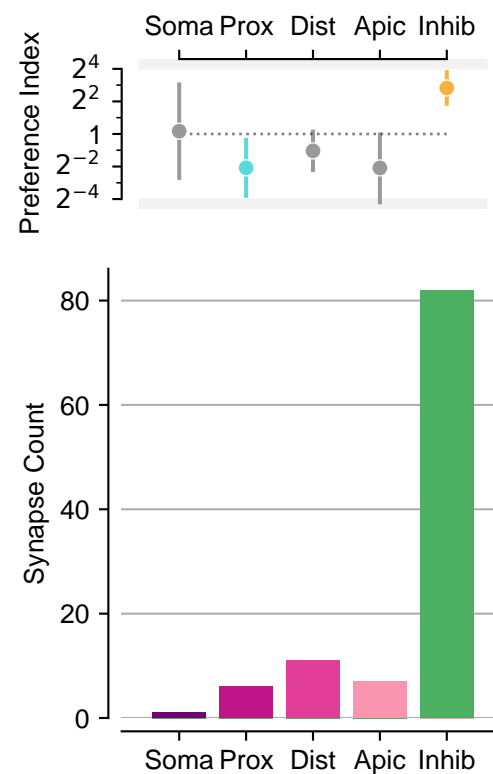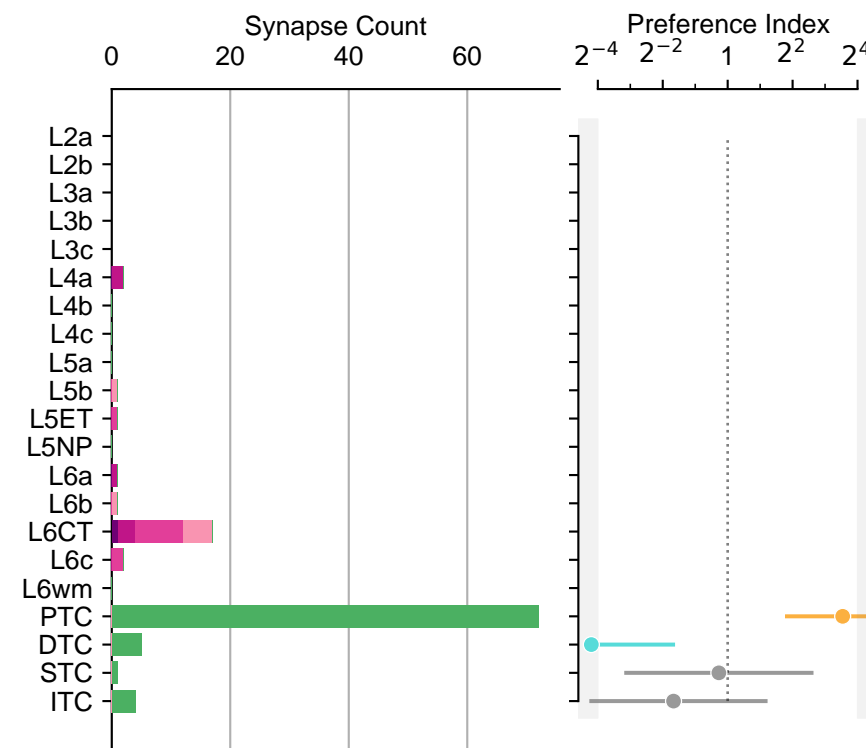

**Unclassified (too few synapses in column)**

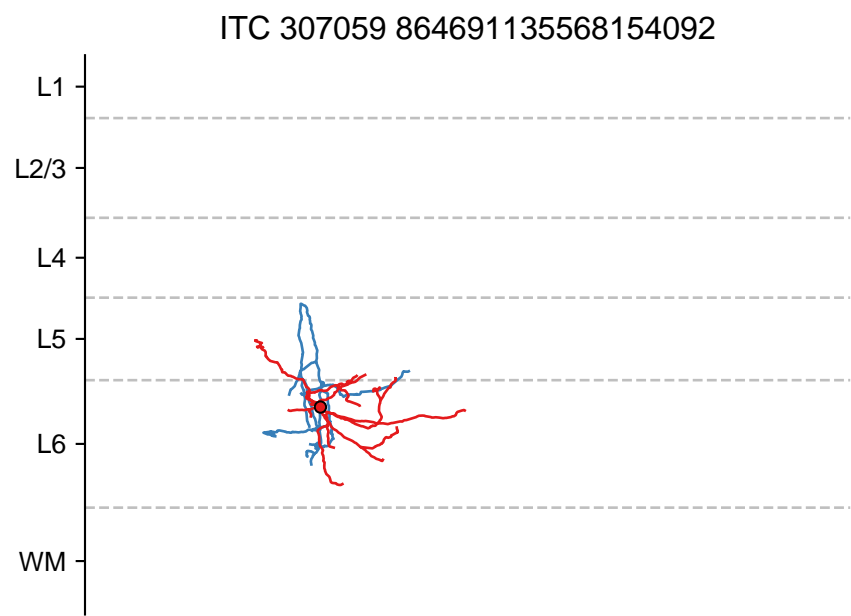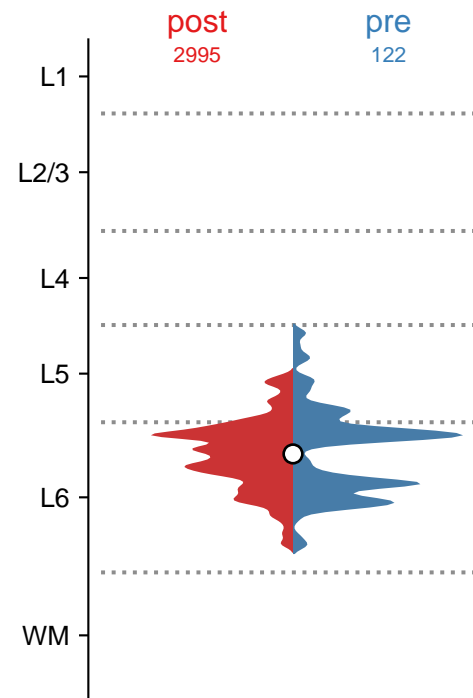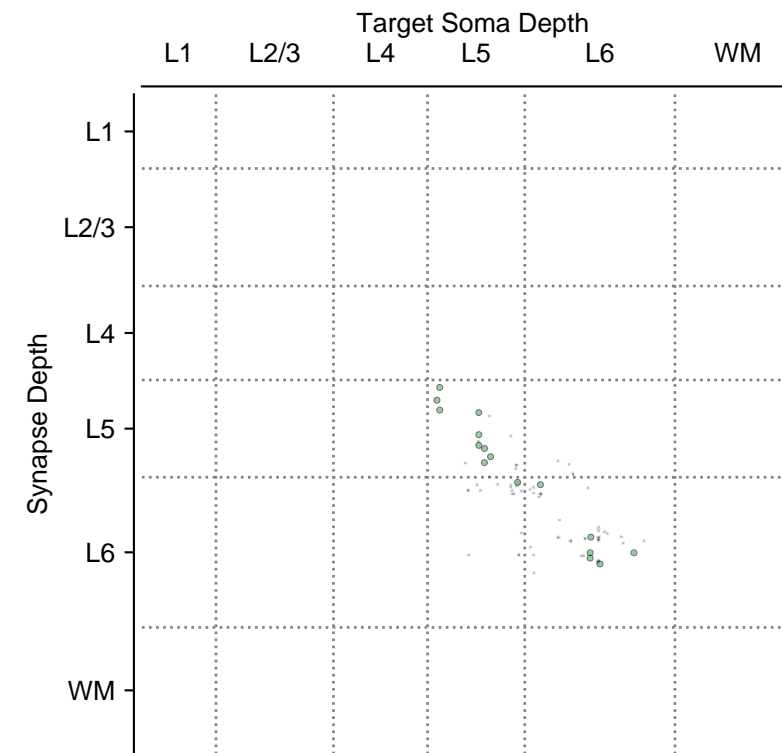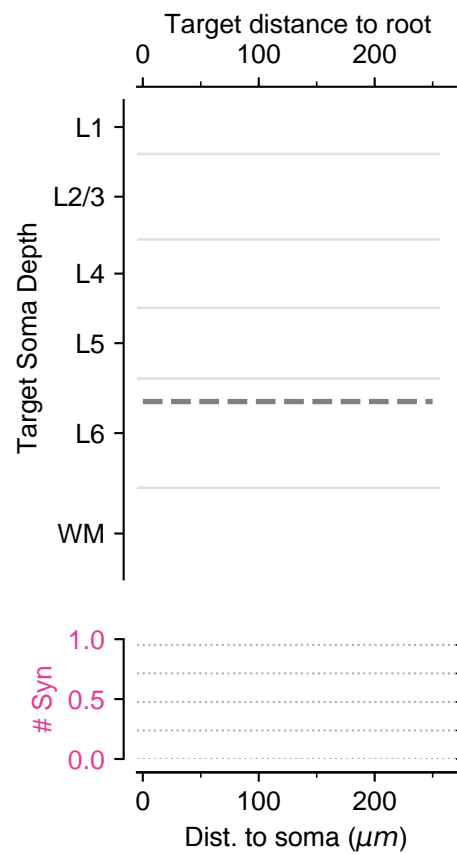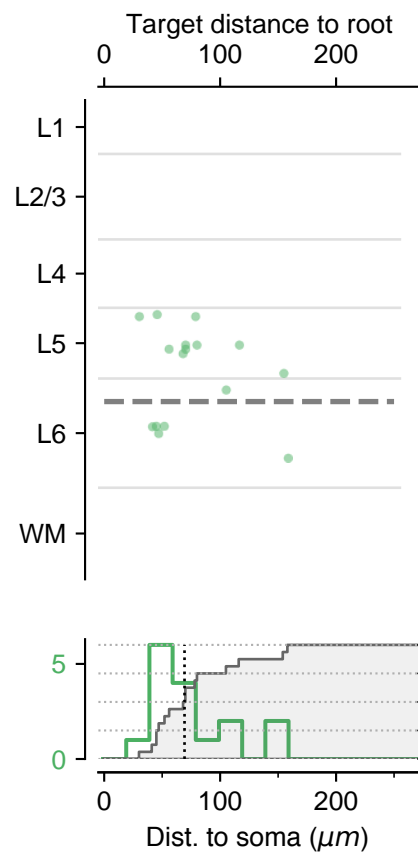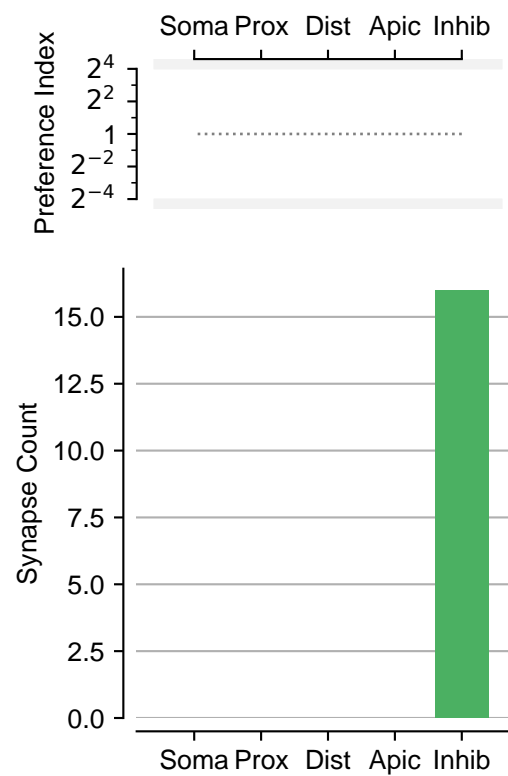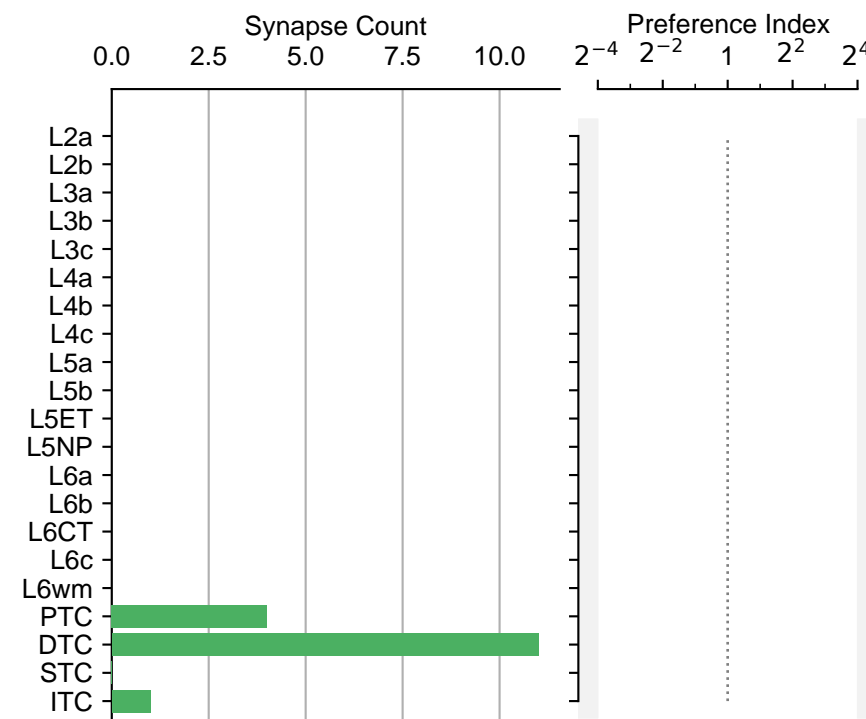

Supplement: media-1.pdf [file media-1.pdf]
